# Supplementary material
Source: PubMed Central journal article supplement (PMC6613210)

# Insets of Figures

Color bar of differential gene expression:

Knock\_out

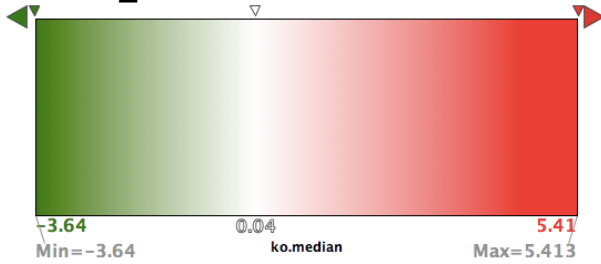

Topological classification:

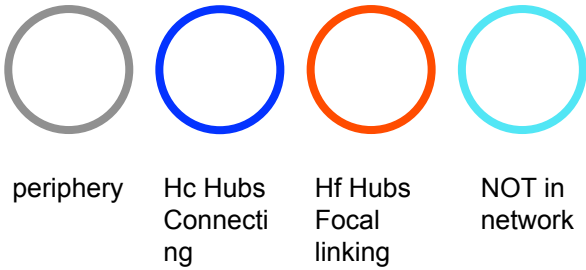

Wild type

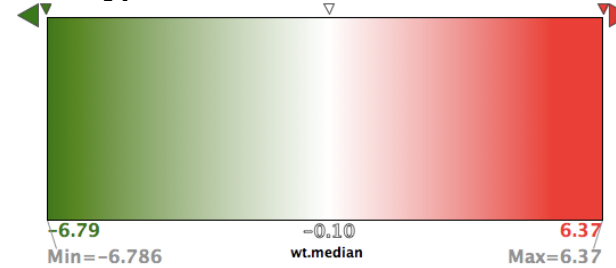

Co-expression shown statistically significant in different experimental groups:

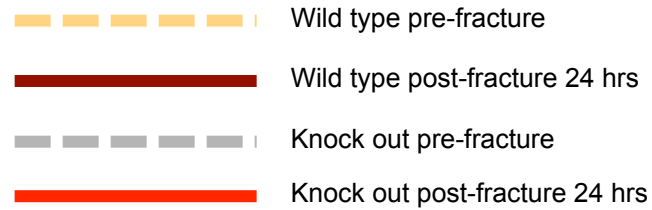

# Fig S1 Merged Differential Expression Networks – Wild Type

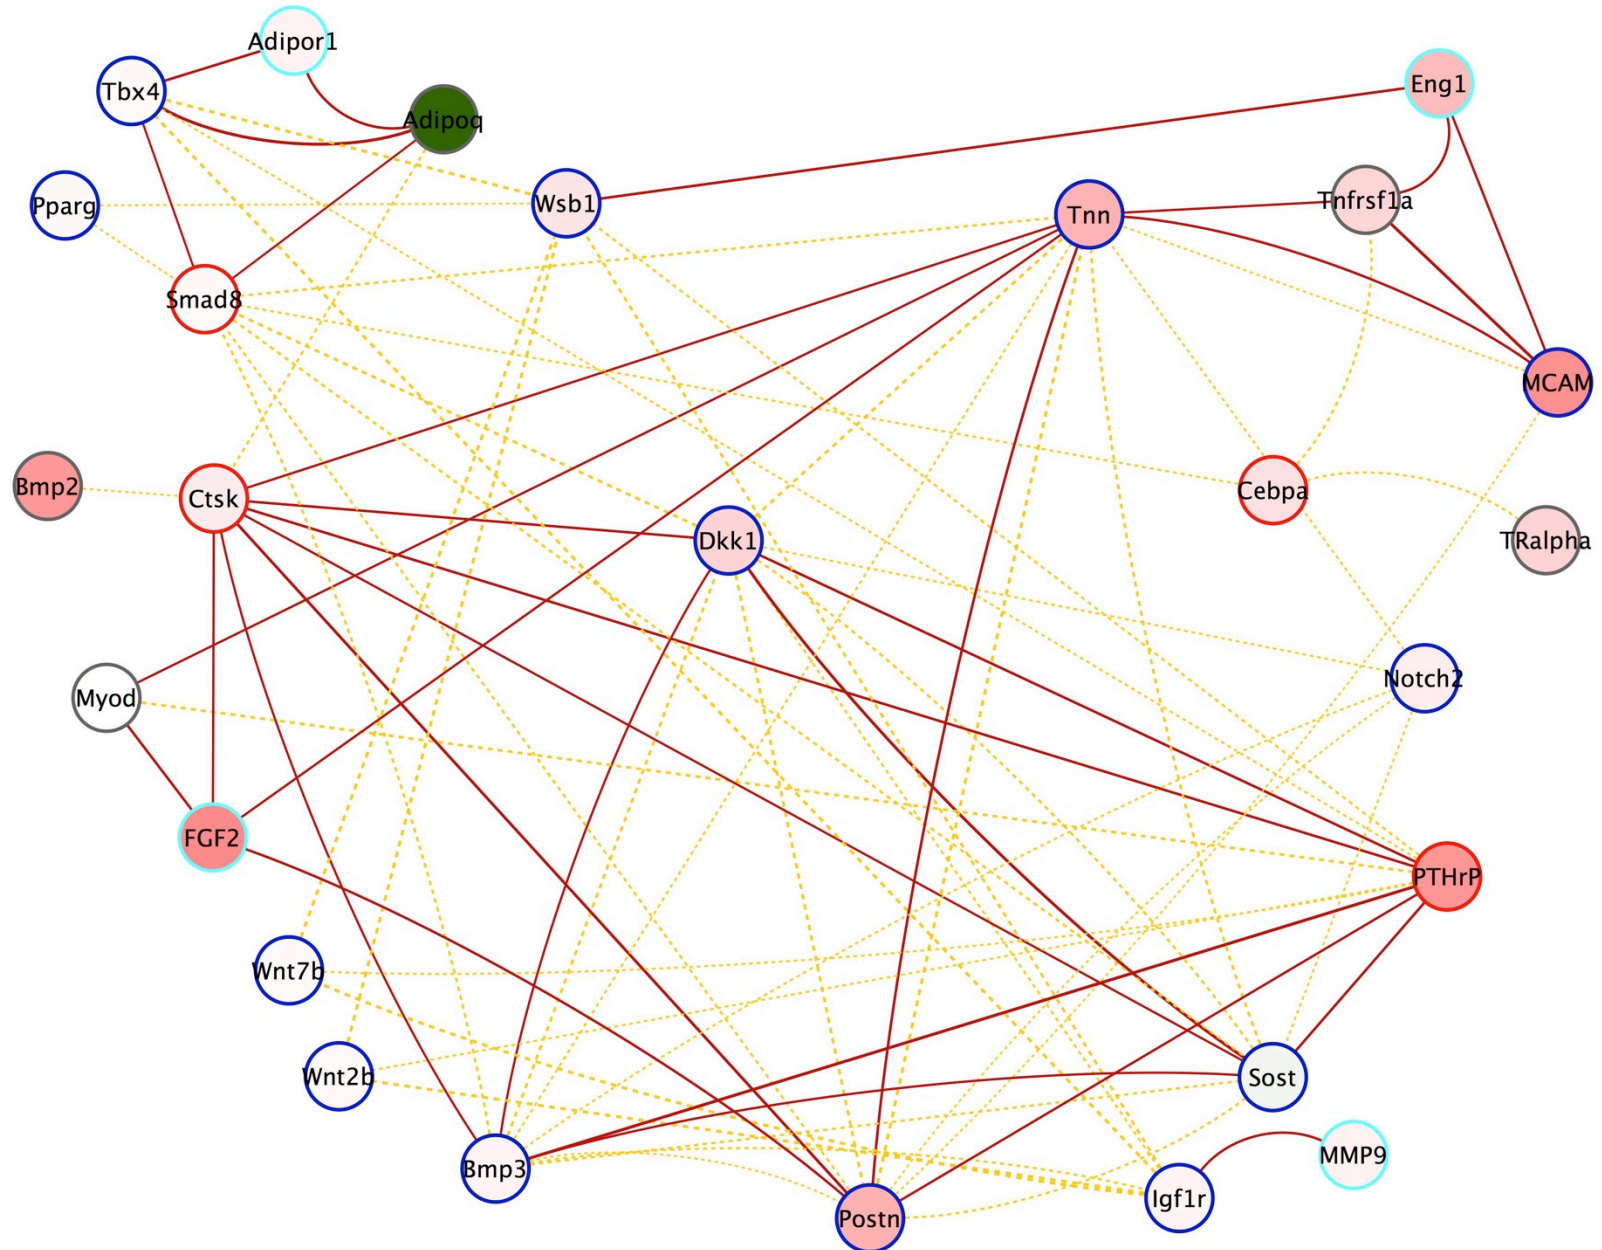

# Fig S2 Differential Expression Networks – Wild-type Pre-fracture

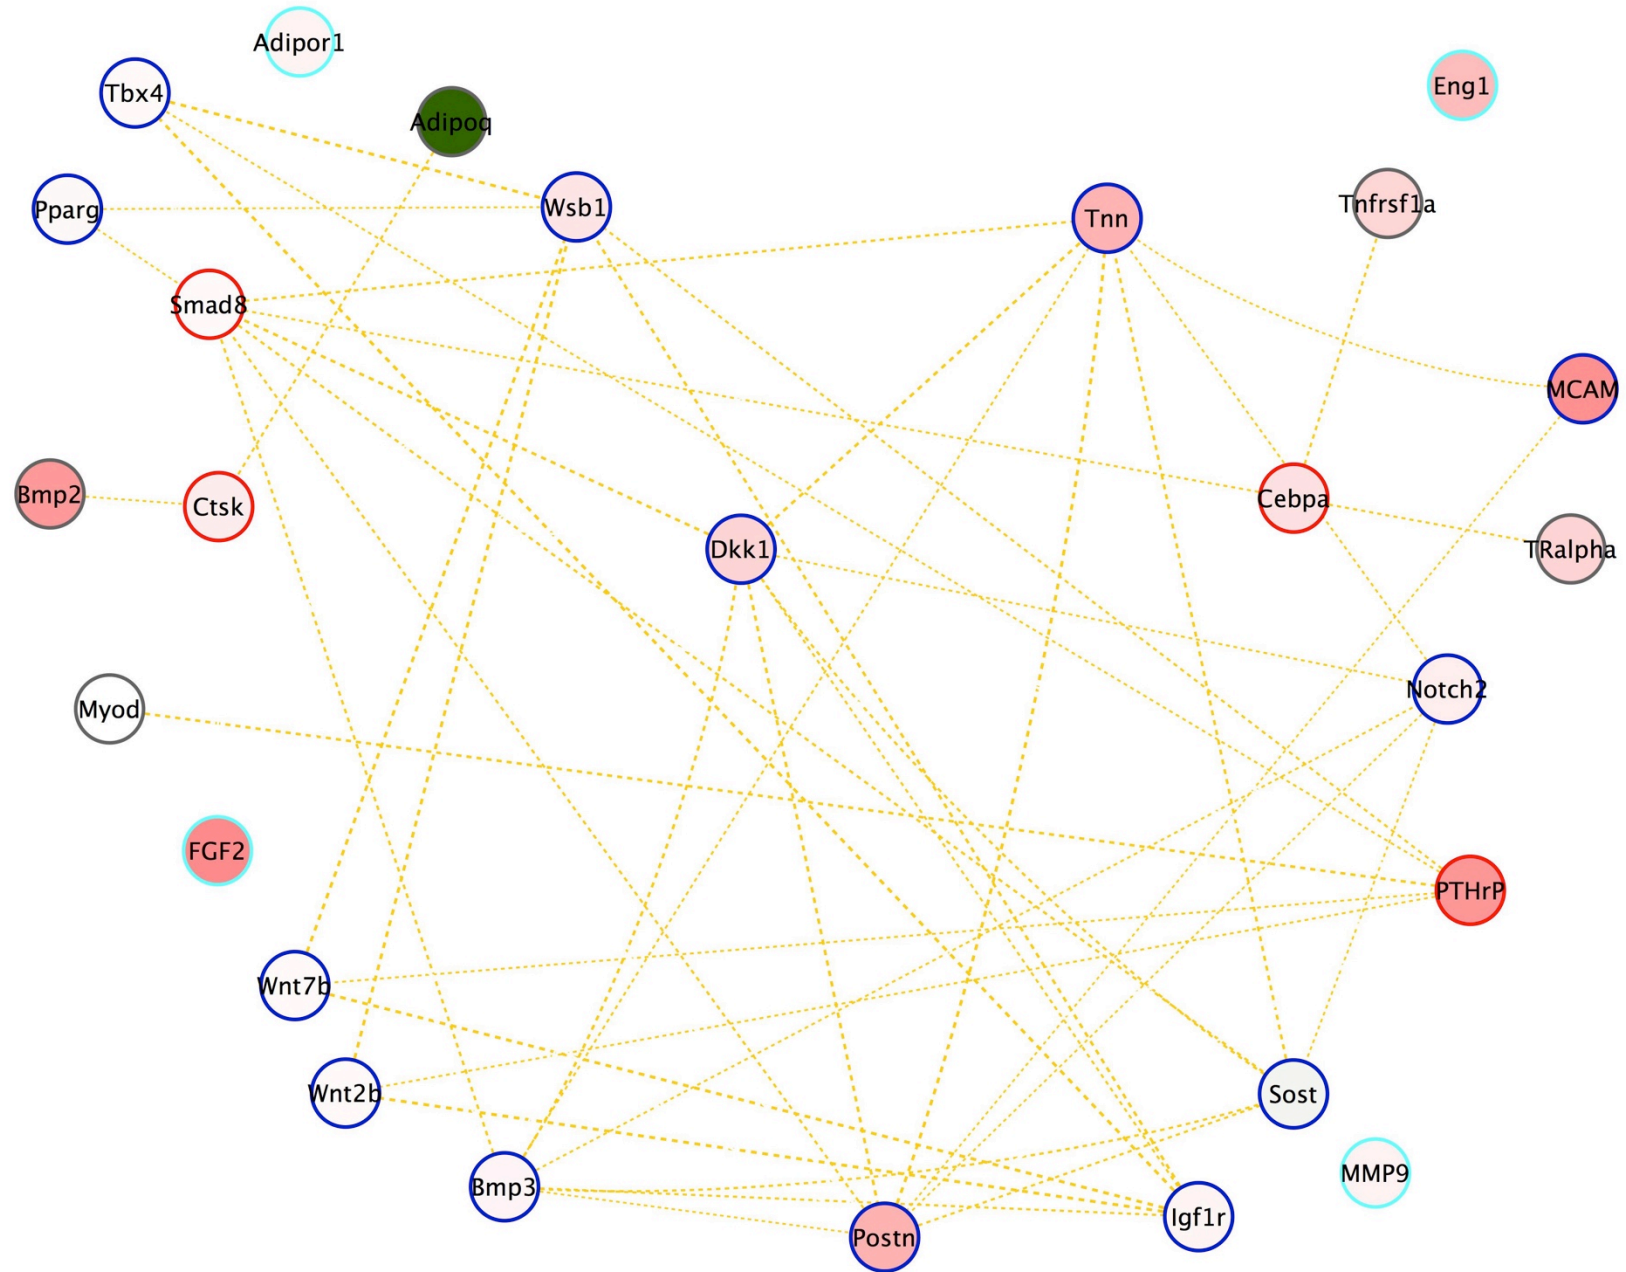

# Fig S3 Differential Expression Networks – Wild-type Post-fracture

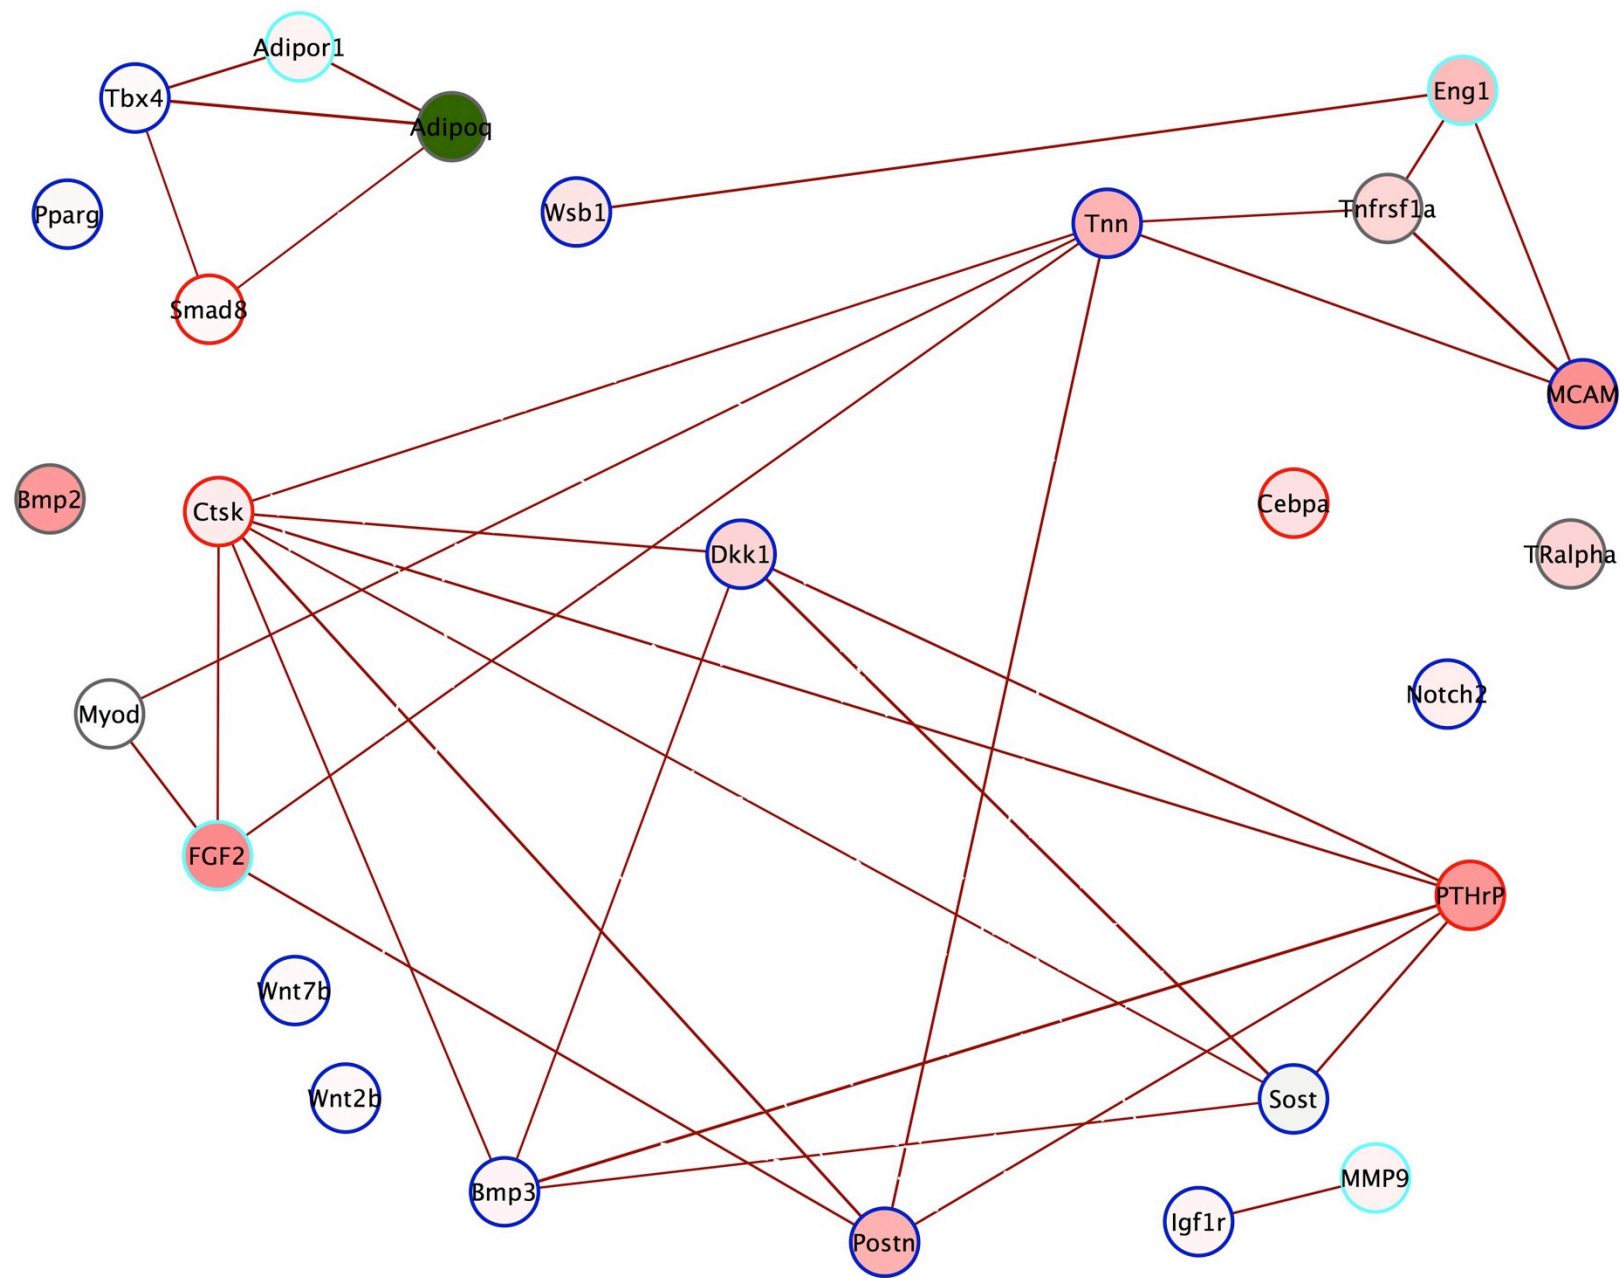

# Fig S4 Merged Differential Expression Networks – Knockout

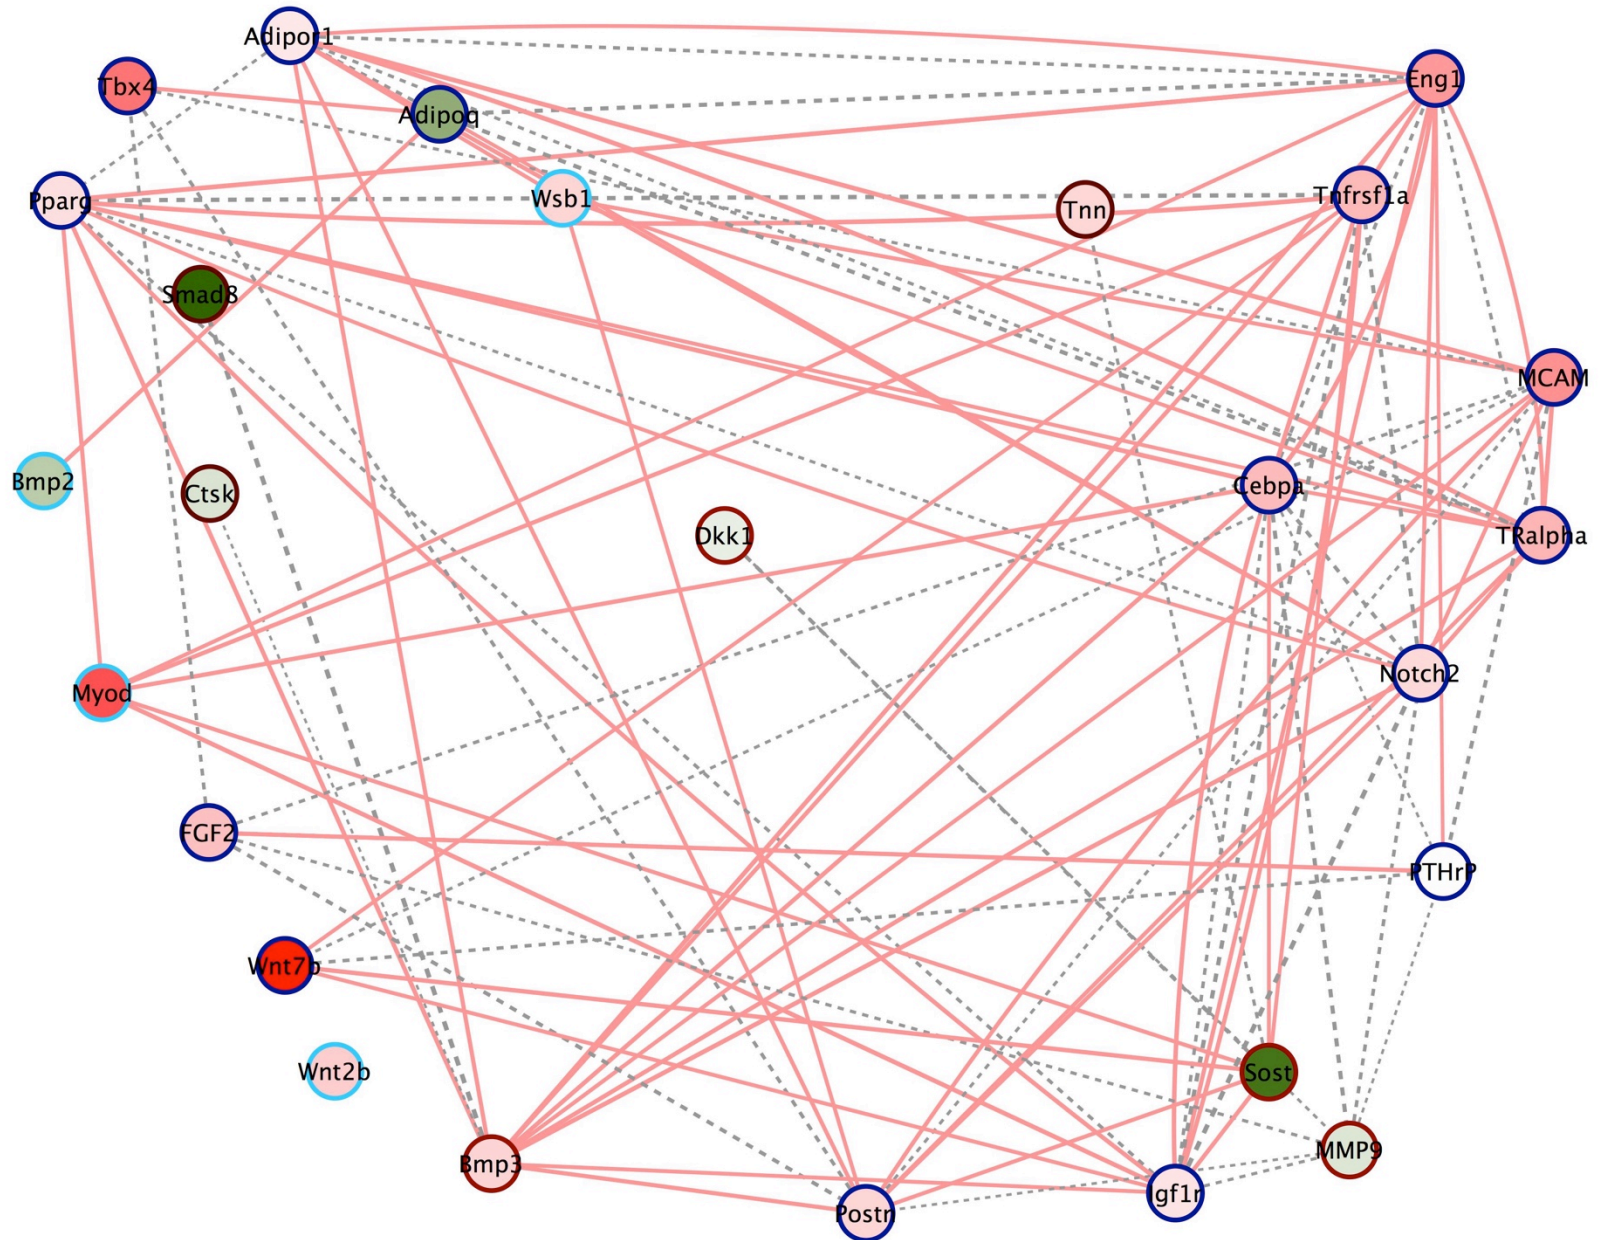

# Fig S5 Differential Expression Networks – Knockout Pre-facture

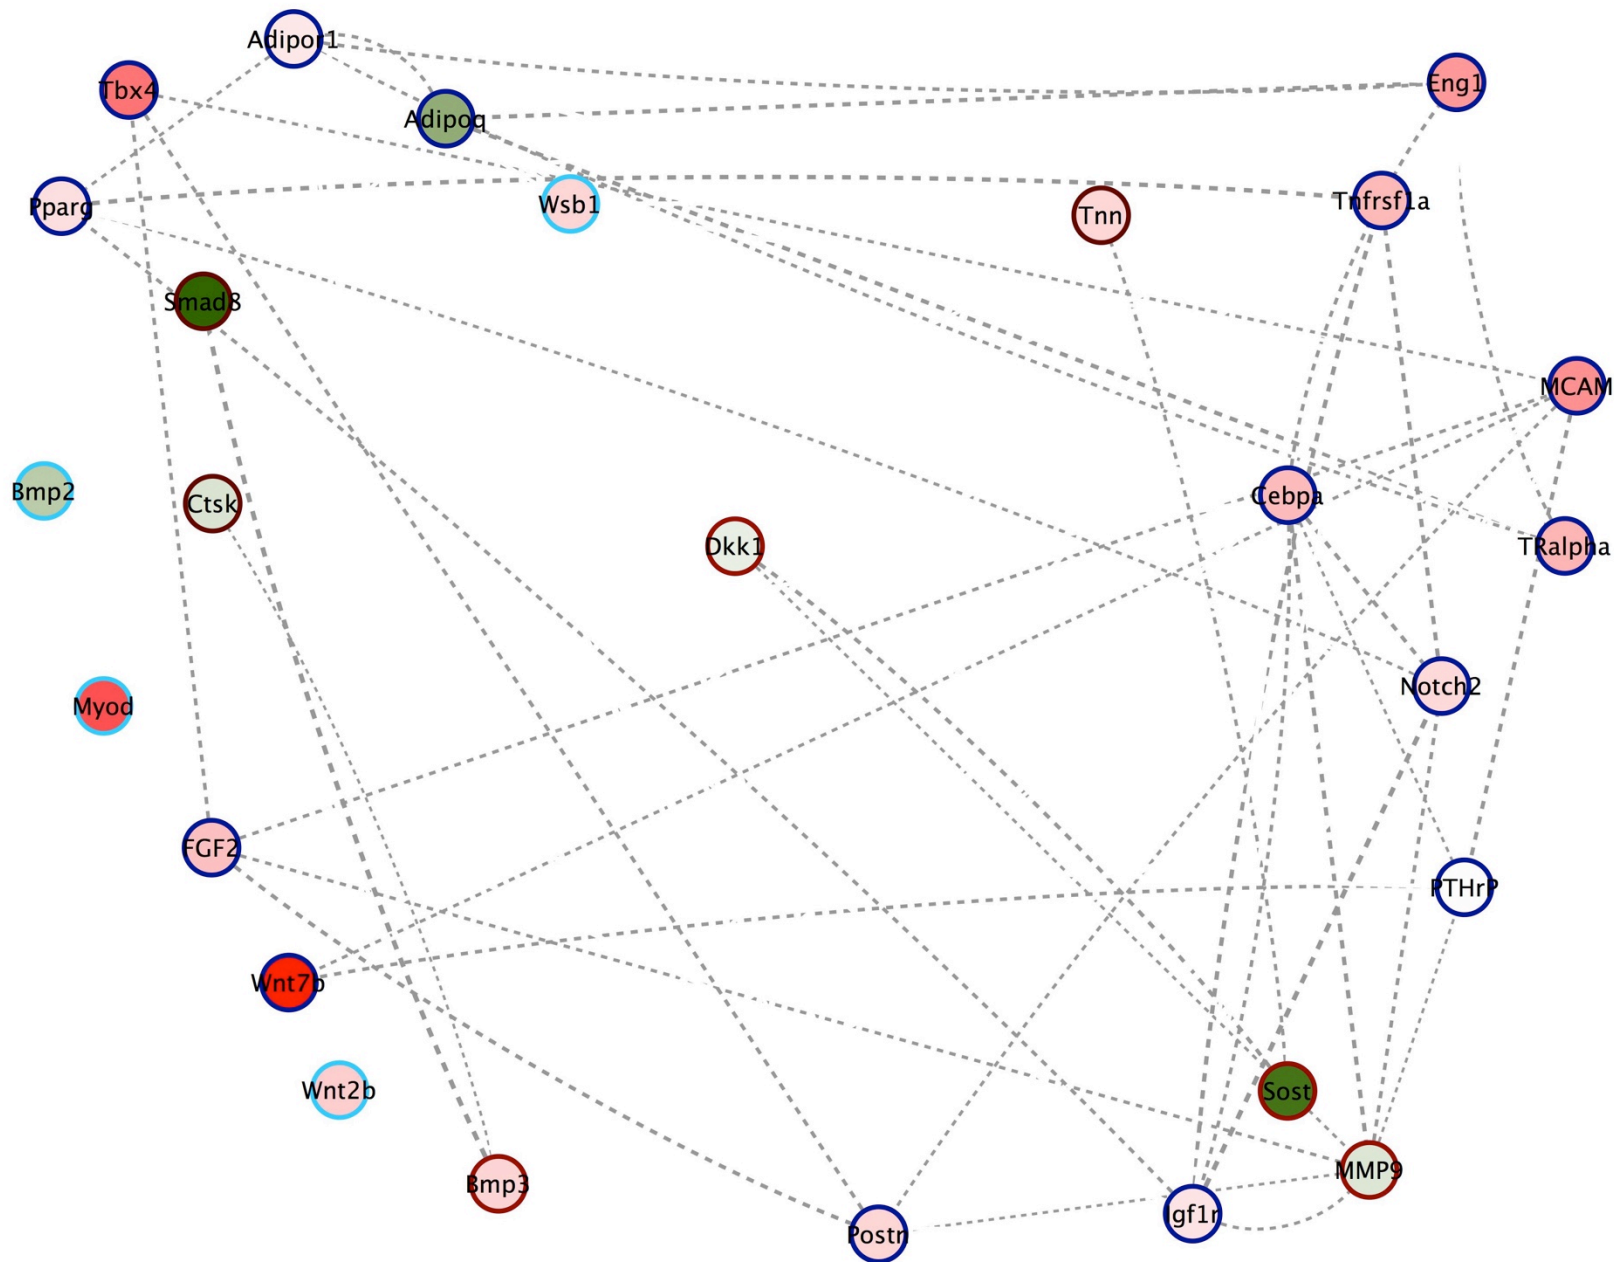

**Fig S6 Differential Expression Networks – Knockout Post-facture**

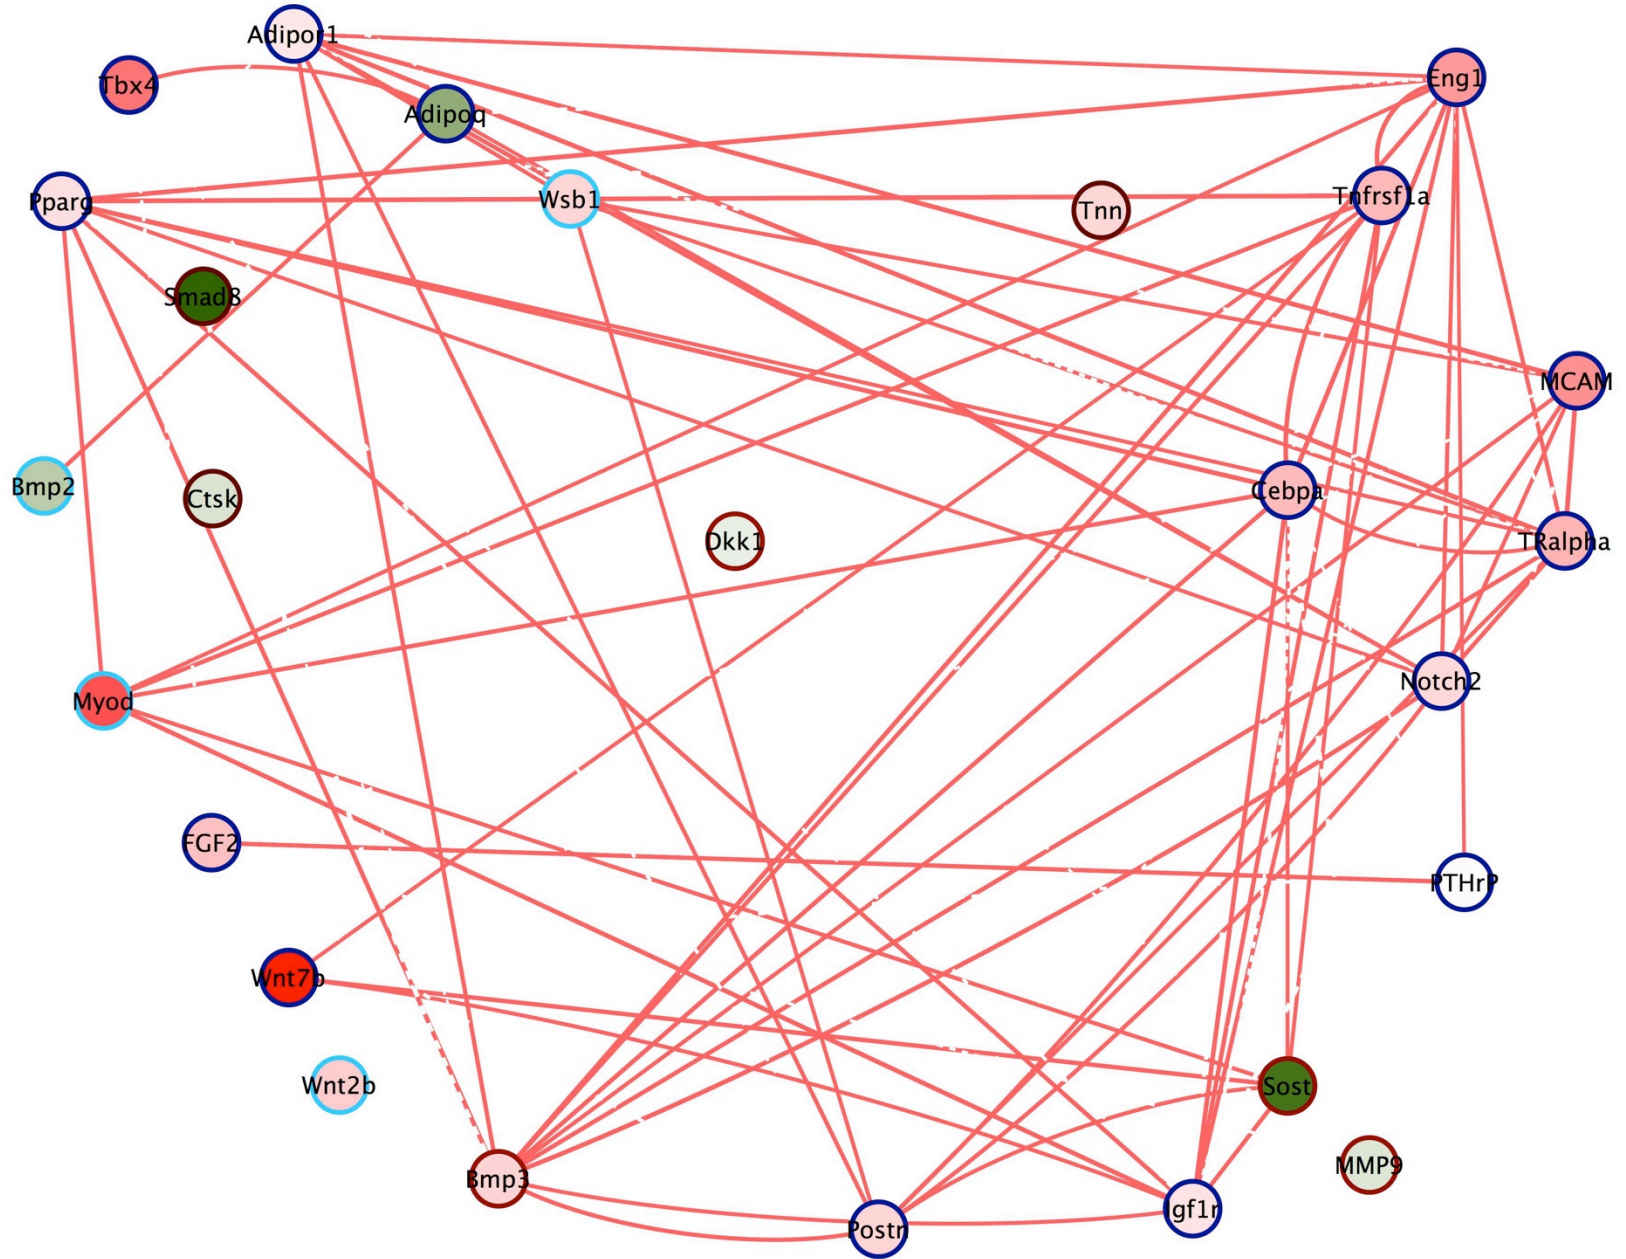





# Fig S8 Adipoq

pre pre post post

Differential Expression

Wild-type

Knockout

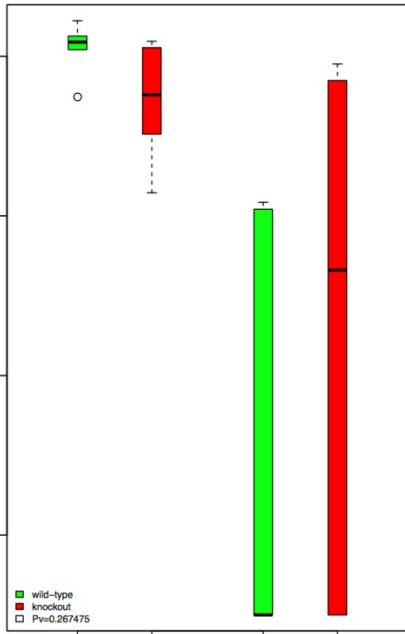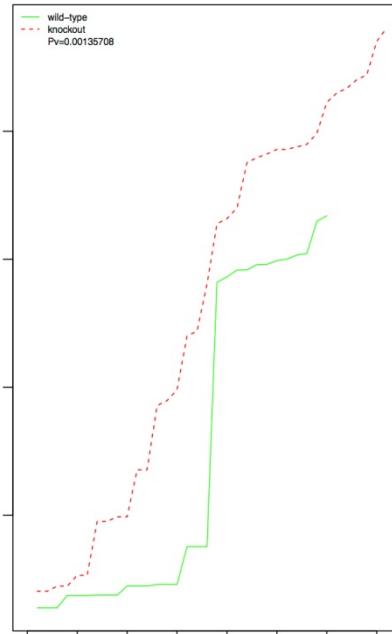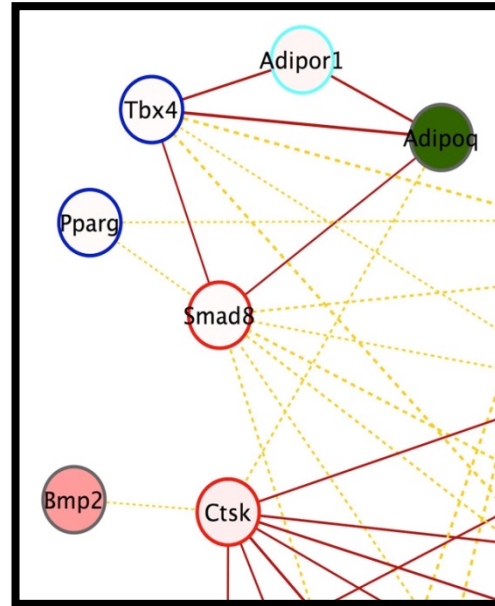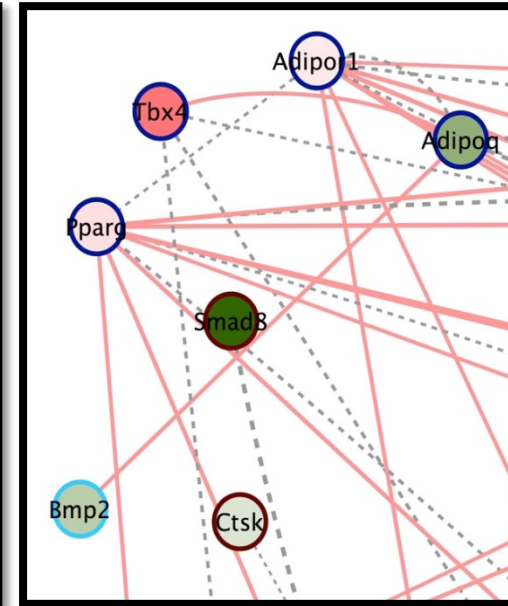

| Networks | Gene.a | Gene.b  | Corr  | P        |
|----------|--------|---------|-------|----------|
| wt_pre   | Adipoq | Ctsk    | 0.90  | 0.01     |
| wt_24hrs | Adipoq | Adipor1 | -0.93 | 0.02     |
| wt_24hrs | Adipoq | Smad8   | 0.88  | 0.047    |
| wt_24hrs | Adipoq | Tbx4    | 0.99  | 2.80E-09 |
| ko_pre   | Adipoq | Adipor1 | -0.88 | 0.02     |
| ko_pre   | Adipoq | Eng1    | -0.95 | 0.004    |
| ko_pre   | Adipoq | TRalpha | -0.94 | 0.005    |
| ko_24hrs | Adipoq | Bmp2    | 0.94  | 0.005    |
| ko_24hrs | Adipoq | Notch2  | -0.91 | 0.01     |
| ko_24hrs | Adipoq | Tbx4    | -0.94 | 0.005    |

# Fig S9 Adipor1

| Networks | Gene.a  | Gene.b  | Corr  | P       |
|----------|---------|---------|-------|---------|
| wt_pre   | NA      | NA      | NA    | NA      |
| wt_24hrs | Adipor1 | Tbx4    | -0.93 | 0.02    |
| wt_24hrs | Adipoq  | Adipor1 | -0.93 | 0.02    |
| ko_pre   | Adipor1 | Eng1    | 0.87  | 0.02    |
| ko_pre   | Adipor1 | Pparg   | -0.85 | 0.03    |
| ko_pre   | Adipor1 | TRalpha | 0.84  | 0.04    |
| ko_24hrs | Adipor1 | Bmp3    | 0.95  | 0.004   |
| ko_24hrs | Adipor1 | Eng1    | 0.91  | 0.01    |
| ko_24hrs | Adipor1 | MCAM    | 0.99  | 4.5E-05 |
| ko_24hrs | Adipor1 | Notch2  | 0.95  | 0.004   |
| ko_24hrs | Adipor1 | Postn   | 0.94  | 0.006   |
| ko_24hrs | Adipor1 | TRalpha | 0.997 | 1.2E-05 |
| ko_24hrs | Adipor1 | Wsb1    | 0.91  | 0.01    |

## Wild-type

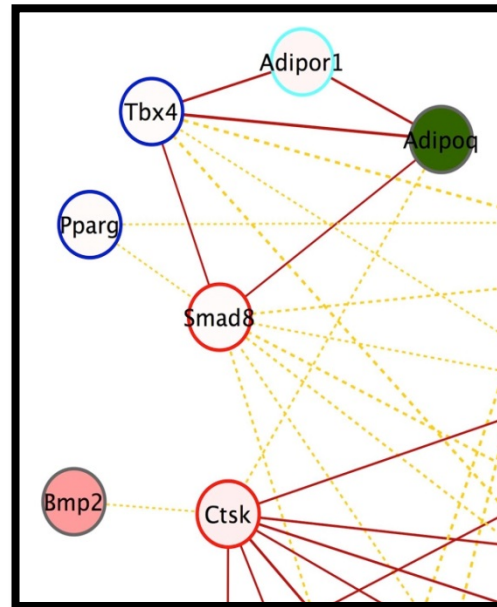

## Knockout

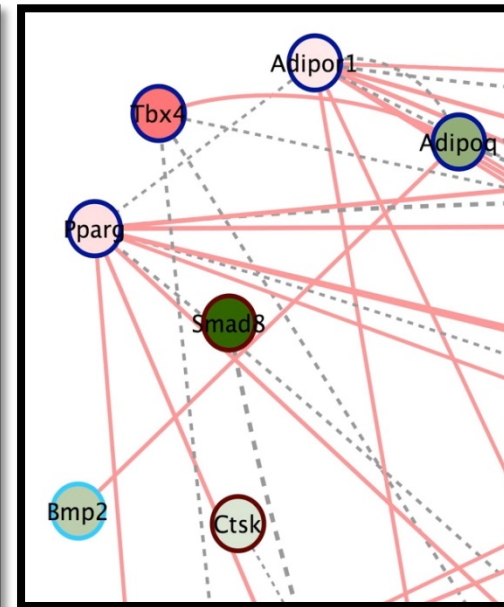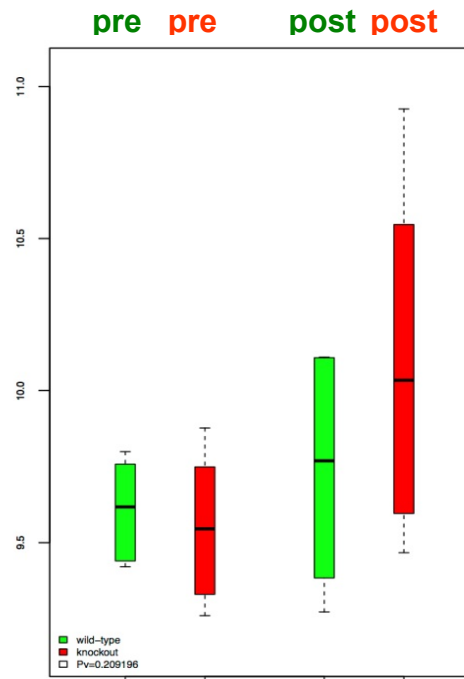

## Differential Expression

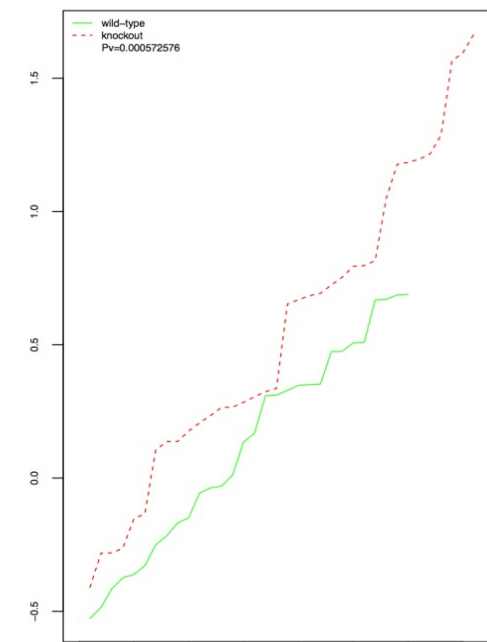

# Fig S10 Bmp2

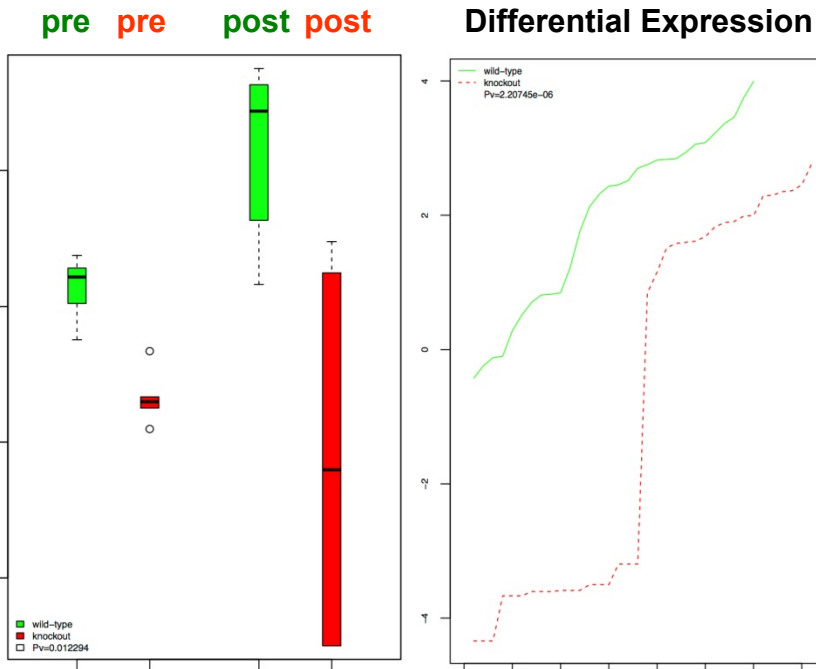

## Wild-type

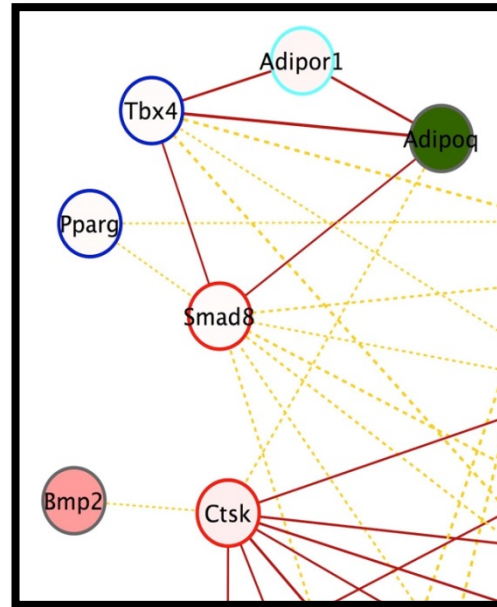

## Knockout

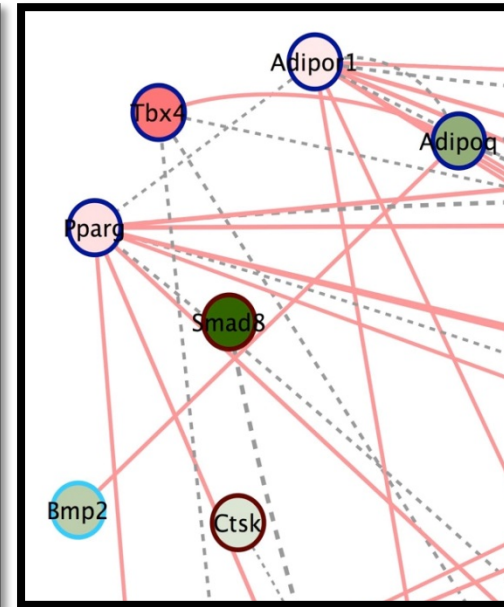

| Networks | Gene.a | Gene.b | Corr | <i>P</i> |
|----------|--------|--------|------|----------|
| wt_pre   | Bmp2   | Ctsk   | 0.85 | 0.03     |
| wt_24hrs | NA     | NA     | NA   | NA       |
| ko_pre   | NA     | NA     | NA   | NA       |
| ko_24hrs | Adipoq | Bmp2   | 0.94 | 0.005    |

# Fig S11 Bmp3

| Networks | Gene.a | Gene.b   | Corr   | P        |
|----------|--------|----------|--------|----------|
| wt_pre   | Bmp3   | Dkk1     | 0.95   | 0.004    |
| wt_pre   | Bmp3   | Igf1r    | -0.86  | 0.03     |
| wt_pre   | Bmp3   | Notch2   | -0.83  | 0.04     |
| wt_pre   | Bmp3   | Postn    | 0.84   | 0.04     |
| wt_pre   | Bmp3   | Smad8    | 0.92   | 0.01     |
| wt_pre   | Bmp3   | Sost     | 0.90   | 0.01     |
| wt_pre   | Bmp3   | Tnn      | 0.87   | 0.02     |
| wt_24hrs | Bmp3   | Ctsk     | 0.90   | 0.04     |
| wt_24hrs | Bmp3   | Dkk1     | 0.90   | 0.04     |
| wt_24hrs | Bmp3   | PTHrP    | -0.996 | 0.0002   |
| wt_24hrs | Bmp3   | Sost     | 0.91   | 0.03     |
| ko_pre   | Bmp3   | Ctsk     | -0.81  | 0.049    |
| ko_pre   | Bmp3   | Smad8    | 0.99   | 4.94E-05 |
| ko_24hrs | Bmp3   | Cebpa    | 0.97   | 0.002    |
| ko_24hrs | Bmp3   | Eng1     | 0.98   | 0.0006   |
| ko_24hrs | Bmp3   | Igf1r    | 0.91   | 0.01     |
| ko_24hrs | Bmp3   | MCAM     | 0.92   | 0.008    |
| ko_24hrs | Bmp3   | Notch2   | 0.98   | 0.0005   |
| ko_24hrs | Bmp3   | Postn    | 0.94   | 0.004    |
| ko_24hrs | Bmp3   | Pparg    | 0.97   | 0.002    |
| ko_24hrs | Bmp3   | Tnfrsf1a | 0.95   | 0.004    |
| ko_24hrs | Bmp3   | TRalpha  | 0.96   | 0.002    |

## Wild-type

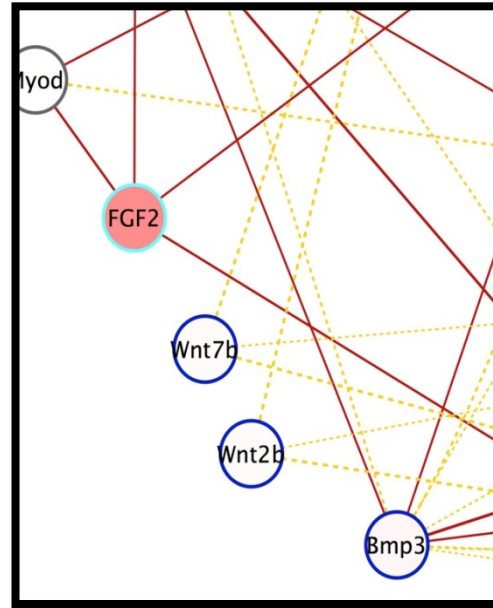

## Knockout

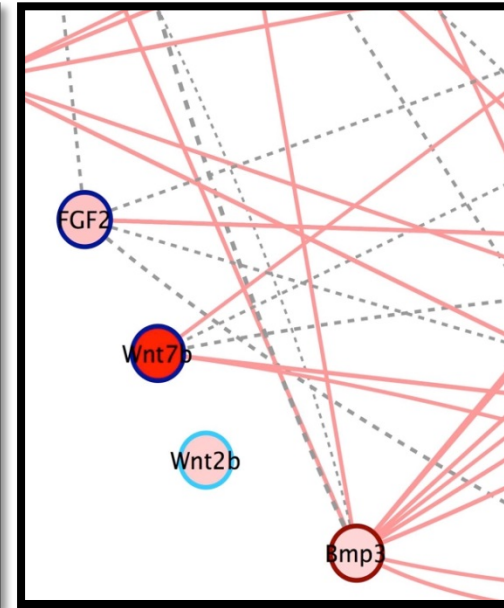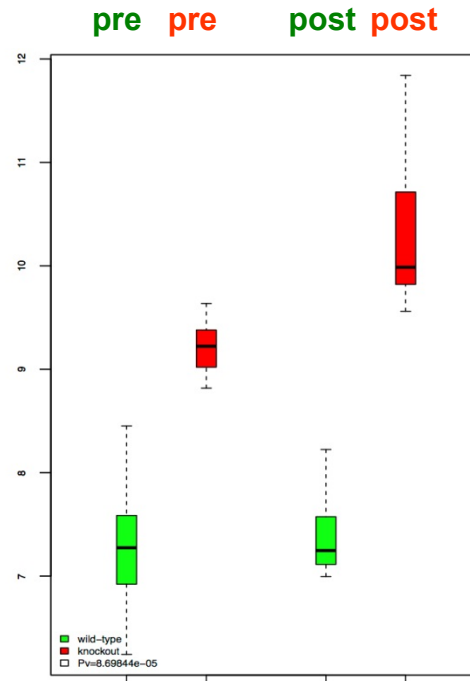

## Differential Expression

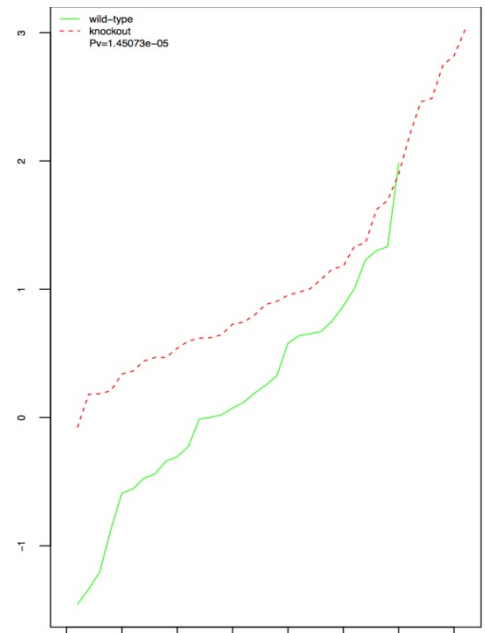

# Fig S12 Cebpa

| Networks | Gene.a | Gene.b   | Corr  | P        |
|----------|--------|----------|-------|----------|
| wt_pre   | Cebpa  | Smad8    | -0.85 | 0.03     |
| wt_pre   | Cebpa  | Tnfrsf1a | 0.90  | 0.01     |
| wt_pre   | Cebpa  | TRalpha  | 0.88  | 0.02     |
| wt_24hrs | NA     | NA       | NA    | NA       |
| ko_pre   | Cebpa  | Eng1     | 0.86  | 0.03     |
| ko_pre   | Cebpa  | Igf1r    | 0.86  | 0.03     |
| ko_pre   | Cebpa  | MMP9     | 0.94  | 0.006    |
| ko_pre   | Cebpa  | Notch2   | 0.89  | 0.02     |
| ko_pre   | Cebpa  | PTHrP    | -0.83 | 0.04     |
| ko_24hrs | Cebpa  | Eng1     | 0.99  | 0.0001   |
| ko_24hrs | Cebpa  | Igf1r    | 0.98  | 0.0008   |
| ko_24hrs | Cebpa  | Myod     | 0.96  | 0.003    |
| ko_24hrs | Cebpa  | Pparg    | 0.99  | 7.69E-05 |
| ko_24hrs | Cebpa  | Sost     | 0.91  | 0.01     |
| ko_24hrs | Cebpa  | Tnfrsf1a | 0.98  | 0.0006   |
| ko_24hrs | Cebpa  | TRalpha  | 0.91  | 0.01     |
| ko_24hrs | Bmp3   | Cebpa    | 0.97  | 0.002    |

## Wild-type

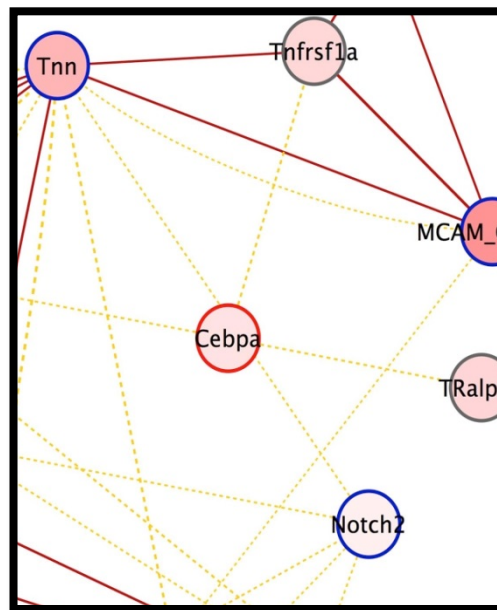

## Knockout

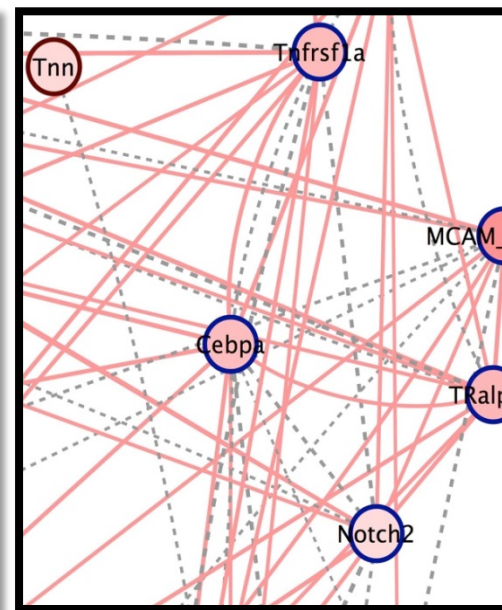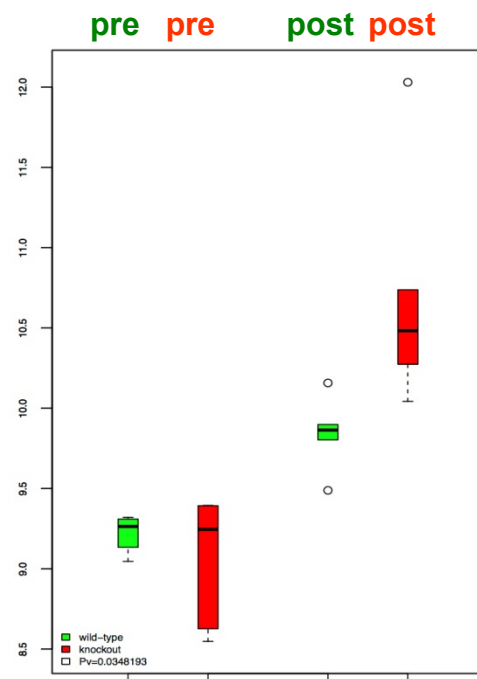

## Differential Expression

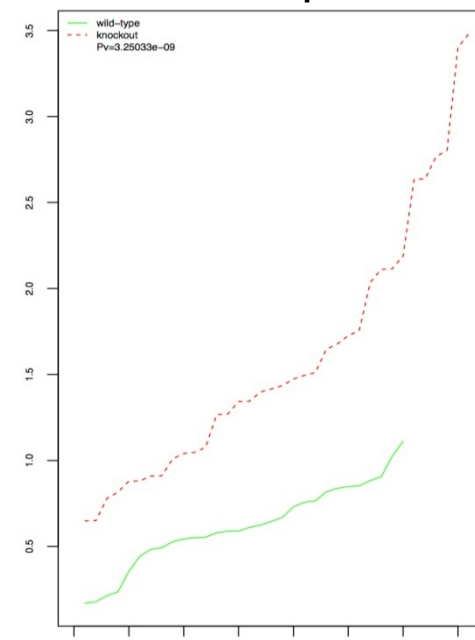

# Fig S13 Ctsk

| Networks | Gene.a | Gene.b | Corr  | P     |
|----------|--------|--------|-------|-------|
| wt_pre   | Adipoq | Ctsk   | 0.90  | 0.01  |
| wt_pre   | Bmp2   | Ctsk   | 0.85  | 0.03  |
| wt_24hrs | Ctsk   | Dkk1   | 0.93  | 0.02  |
| wt_24hrs | Ctsk   | FGF2   | -0.89 | 0.045 |
| wt_24hrs | Ctsk   | Postn  | 0.98  | 0.004 |
| wt_24hrs | Ctsk   | PTHrP  | -0.93 | 0.02  |
| wt_24hrs | Ctsk   | Sost   | 0.90  | 0.04  |
| wt_24hrs | Ctsk   | Tnn    | 0.91  | 0.03  |
| wt_24hrs | Bmp3   | Ctsk   | 0.90  | 0.04  |
| ko_pre   | Bmp3   | Ctsk   | -0.81 | 0.049 |
| ko_24hrs | NA     | NA     | NA    | NA    |

## Wild-type

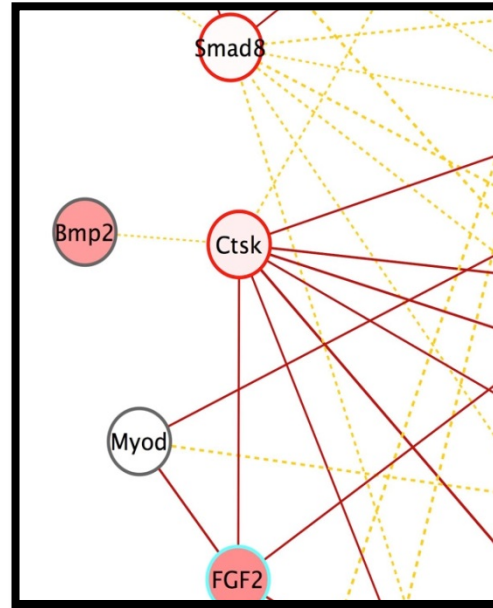

## Knockout

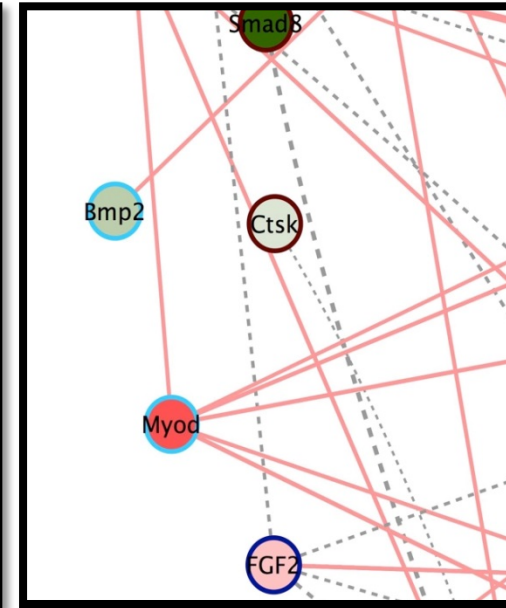

pre pre post post

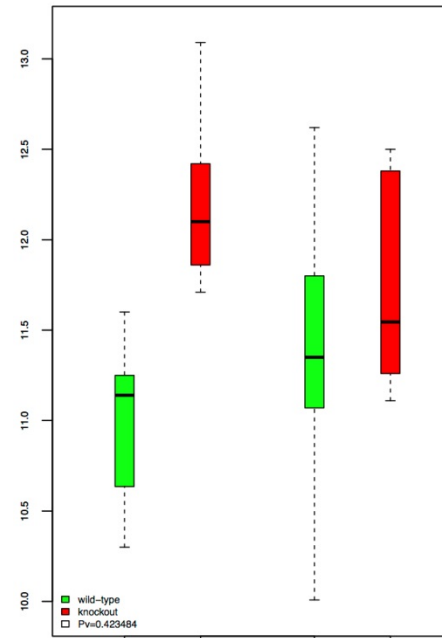

## Differential Expression

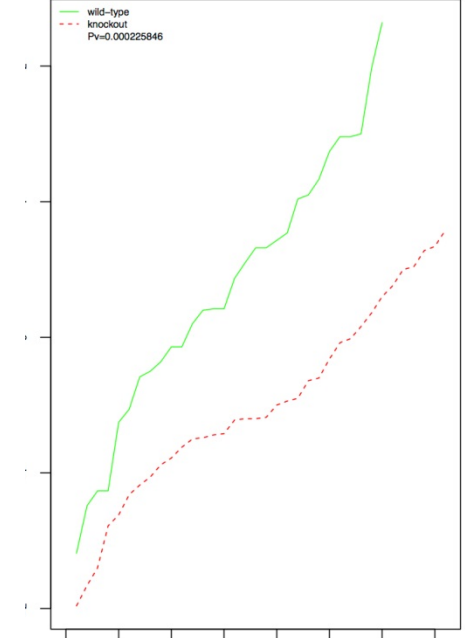

# Fig S14 Dkk1

| Networks | Gene.a | Gene.b | Corr  | P      |
|----------|--------|--------|-------|--------|
| wt_pre   | Dkk1   | Igf1r  | -0.86 | 0.03   |
| wt_pre   | Dkk1   | Notch2 | -0.84 | 0.04   |
| wt_pre   | Dkk1   | Postn  | 0.96  | 0.002  |
| wt_pre   | Dkk1   | Smad8  | 0.96  | 0.003  |
| wt_pre   | Dkk1   | Sost   | 0.91  | 0.01   |
| wt_pre   | Dkk1   | Tnn    | 0.96  | 0.002  |
| wt_pre   | Bmp3   | Dkk1   | 0.95  | 0.004  |
| wt_24hrs | Dkk1   | PTHrP  | -0.93 | 0.02   |
| wt_24hrs | Dkk1   | Sost   | 0.99  | 0.0008 |
| wt_24hrs | Bmp3   | Dkk1   | 0.90  | 0.04   |
| wt_24hrs | Ctsk   | Dkk1   | 0.93  | 0.02   |
| ko_pre   | Dkk1   | MMP9   | -0.83 | 0.04   |
| ko_pre   | Dkk1   | Sost   | 0.90  | 0.02   |
| ko_24hrs | NA     | NA     | NA    | NA     |

Wild-type

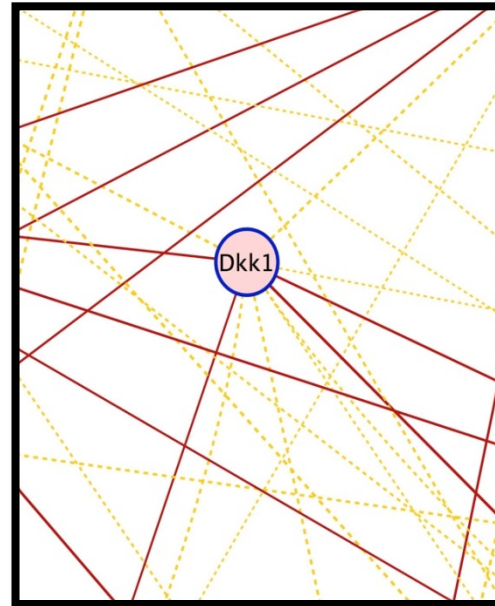

Knockout

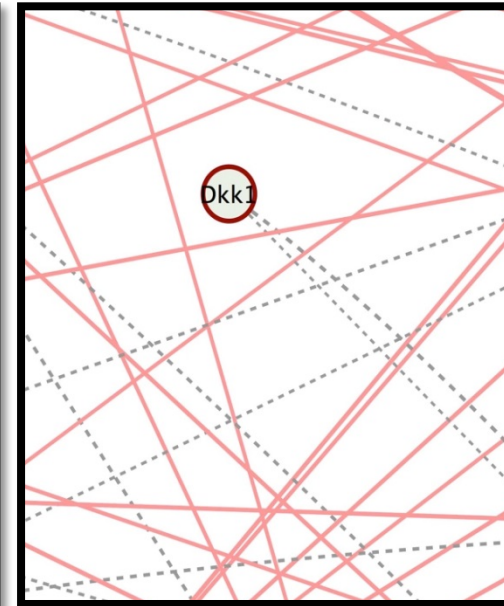

pre pre post post

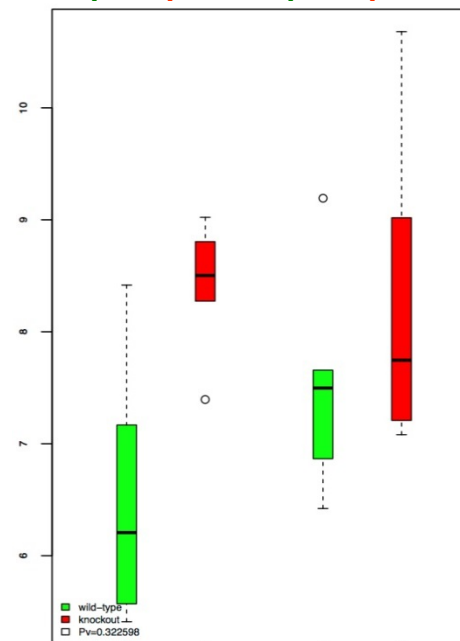

Differential Expression

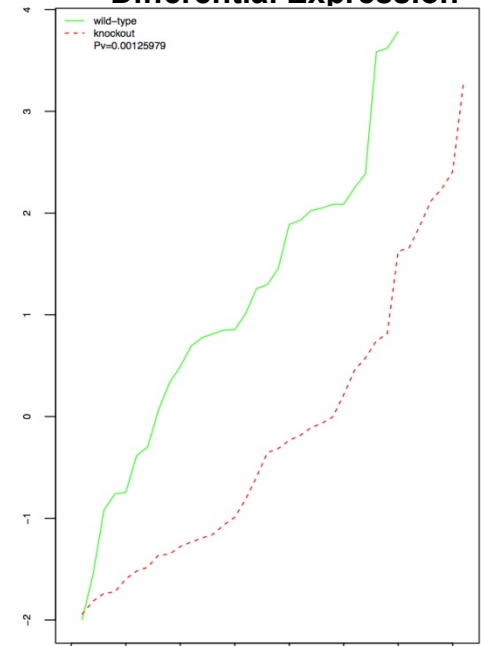

# Fig S15 Eng1

| Networks | Gene.a  | Gene.b   | Corr  | P        |
|----------|---------|----------|-------|----------|
| wt_pre   | NA      | NA       | NA    | NA       |
| wt_24hrs | Eng1    | MCAM     | 0.92  | 0.03     |
| wt_24hrs | Eng1    | Tnfrsf1a | 0.94  | 0.02     |
| wt_24hrs | Eng1    | Wsb1     | 0.95  | 0.01     |
| ko_pre   | Eng1    | TRalpha  | 0.85  | 0.03     |
| ko_pre   | Adipoq  | Eng1     | -0.95 | 0.004    |
| ko_pre   | Adipor1 | Eng1     | 0.87  | 0.02     |
| ko_pre   | Cebpa   | Eng1     | 0.86  | 0.03     |
| ko_24hrs | Eng1    | Igf1r    | 0.95  | 0.004    |
| ko_24hrs | Eng1    | Myod     | 0.92  | 0.01     |
| ko_24hrs | Eng1    | Notch2   | 0.93  | 0.008    |
| ko_24hrs | Eng1    | Pparg    | 0.995 | 3.39E-05 |
| ko_24hrs | Eng1    | PTHrP    | -0.90 | 0.01     |
| ko_24hrs | Eng1    | Tnfrsf1a | 0.98  | 0.0009   |
| ko_24hrs | Eng1    | TRalpha  | 0.93  | 0.007    |
| ko_24hrs | Adipor1 | Eng1     | 0.91  | 0.01     |
| ko_24hrs | Bmp3    | Eng1     | 0.98  | 0.0006   |
| ko_24hrs | Cebpa   | Eng1     | 0.99  | 0.0001   |

## Wild-type

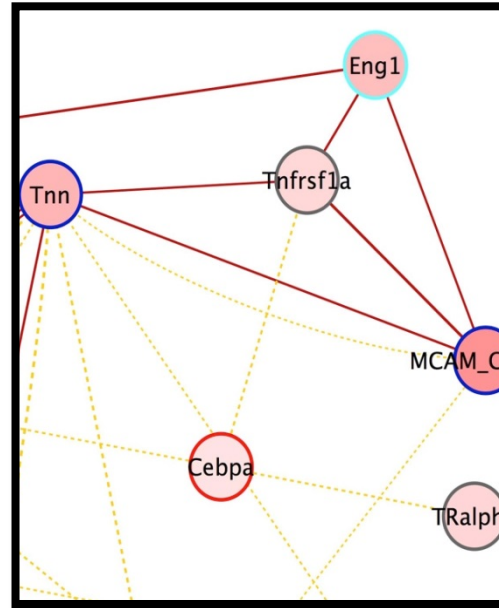

## Knockout

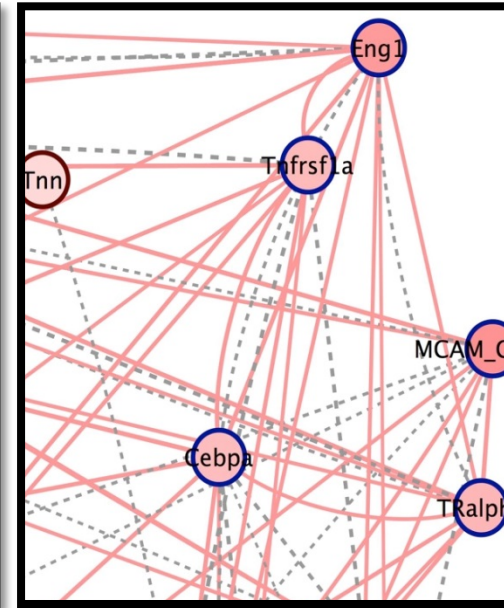

pre pre post post

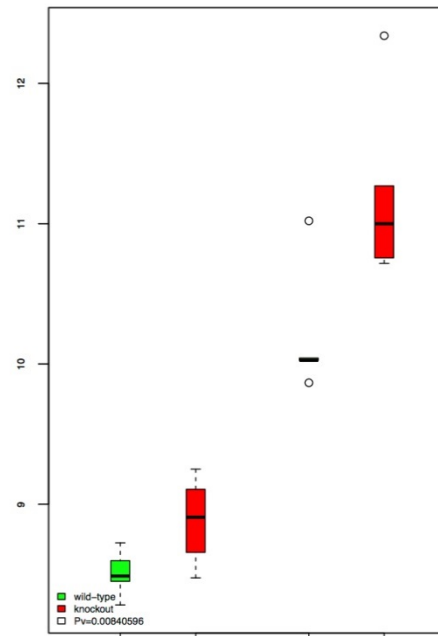

Differential Expression

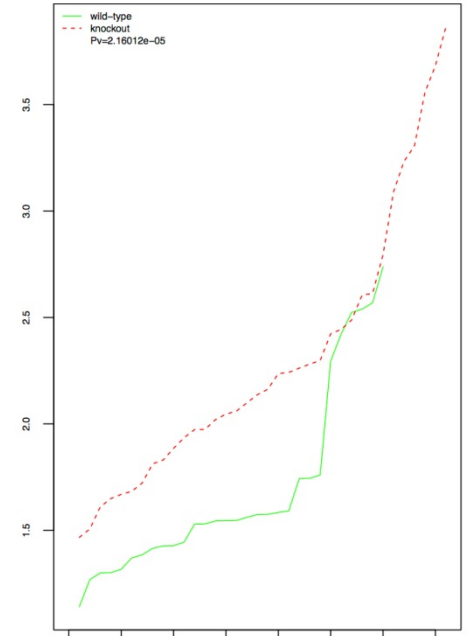



# Fig S16 Fgf2

| Networks | Gene.a | Gene.b | Corr  | P     |
|----------|--------|--------|-------|-------|
| wt_pre   | NA     | NA     | NA    | NA    |
| wt_24hrs | FGF2   | Myod   | 0.94  | 0.02  |
| wt_24hrs | FGF2   | Postn  | -0.92 | 0.03  |
| wt_24hrs | FGF2   | Tnn    | -0.89 | 0.04  |
| wt_24hrs | Ctsk   | FGF2   | -0.89 | 0.045 |
| ko_pre   | FGF2   | MCAM   | 0.85  | 0.03  |
| ko_pre   | FGF2   | MMP9   | -0.87 | 0.02  |
| ko_pre   | FGF2   | Postn  | 0.90  | 0.01  |
| ko_pre   | FGF2   | Tbx4   | 0.87  | 0.02  |
| ko_24hrs | FGF2   | PTHrP  | 0.96  | 0.003 |

## Wild-type

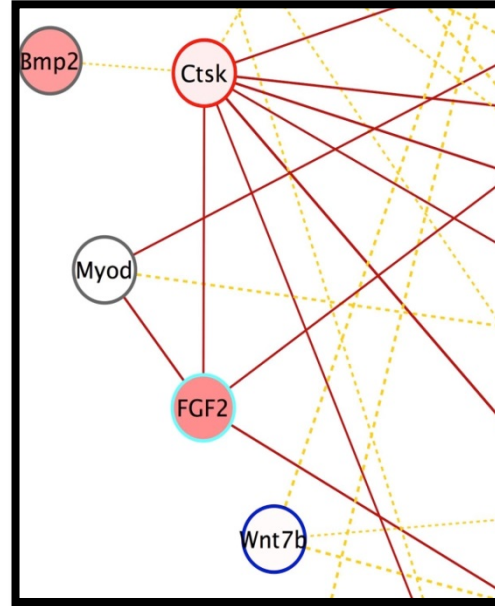

## Knockout

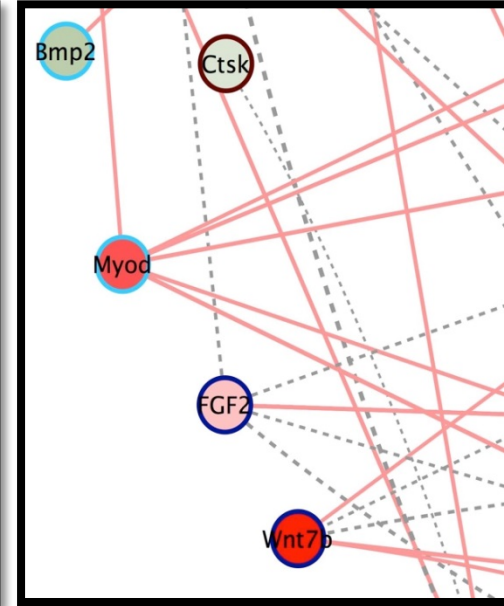

pre pre post post

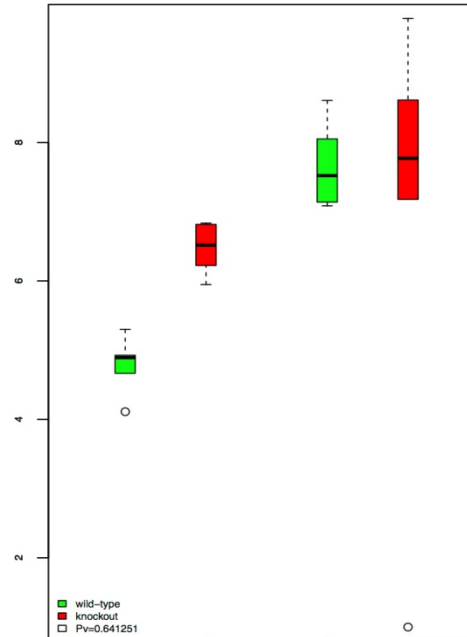

## Differential Expression

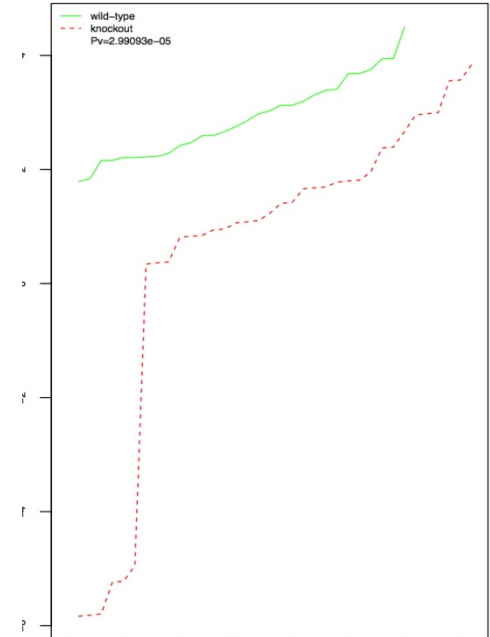

# Fig S17 Igf1r

| Networks | Gene.a | Gene.b   | Corr  | P        |
|----------|--------|----------|-------|----------|
| wt_pre   | Igf1r  | Tbx4     | -0.98 | 0.0008   |
| wt_pre   | Igf1r  | Wnt2b    | -0.98 | 0.0008   |
| wt_pre   | Igf1r  | Wnt7b    | -0.98 | 0.0008   |
| wt_pre   | Igf1r  | Wsb1     | 0.95  | 0.004    |
| wt_pre   | Bmp3   | Igf1r    | -0.86 | 0.03     |
| wt_pre   | Dkk1   | Igf1r    | -0.86 | 0.03     |
| wt_24hrs | Igf1r  | MMP9     | 0.93  | 0.02     |
| ko_pre   | Igf1r  | MMP9     | 0.82  | 0.045    |
| ko_pre   | Igf1r  | Notch2   | 0.99  | 7.55E-05 |
| ko_pre   | Igf1r  | Pparg    | -0.89 | 0.02     |
| ko_pre   | Igf1r  | Tnfrsf1a | 0.95  | 0.004    |
| ko_pre   | Cebpa  | Igf1r    | 0.86  | 0.03     |
| ko_24hrs | Igf1r  | Myod     | 0.98  | 0.0005   |
| ko_24hrs | Igf1r  | Pparg    | 0.96  | 0.002    |
| ko_24hrs | Igf1r  | Sost     | 0.95  | 0.004    |
| ko_24hrs | Igf1r  | Tnfrsf1a | 0.96  | 0.002    |
| ko_24hrs | Igf1r  | Wnt7b    | 0.92  | 0.01     |
| ko_24hrs | Bmp3   | Igf1r    | 0.91  | 0.01     |
| ko_24hrs | Cebpa  | Igf1r    | 0.98  | 0.0008   |
| ko_24hrs | Eng1   | Igf1r    | 0.95  | 0.004    |

## Wild-type

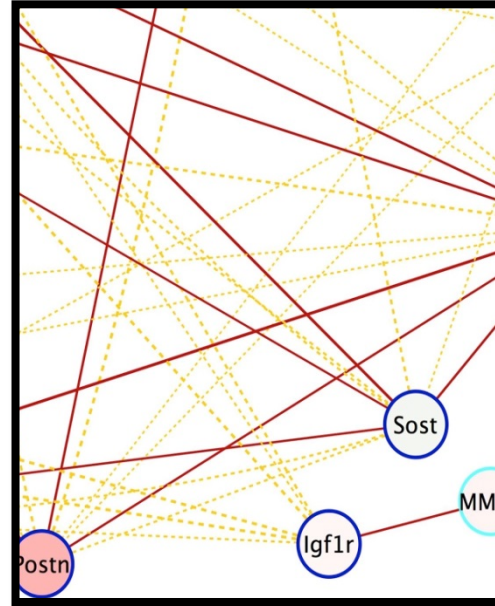

## Knockout

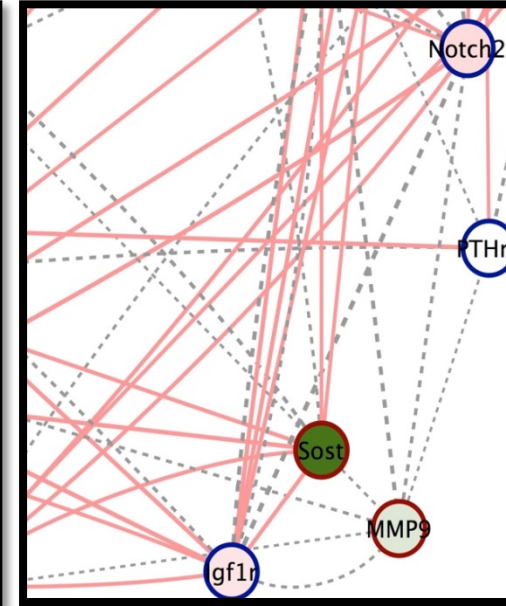

pre pre post post

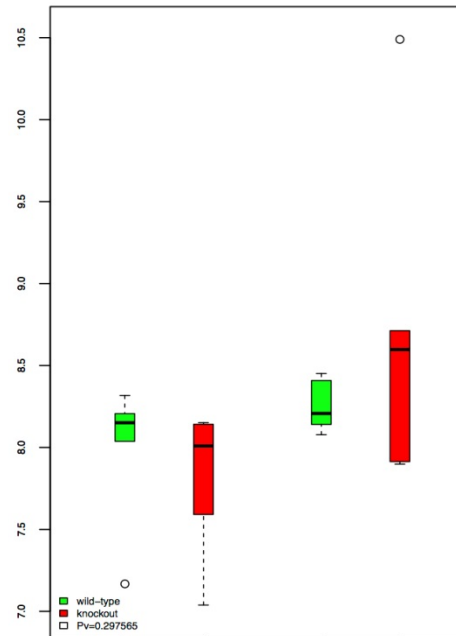

## Differential Expression

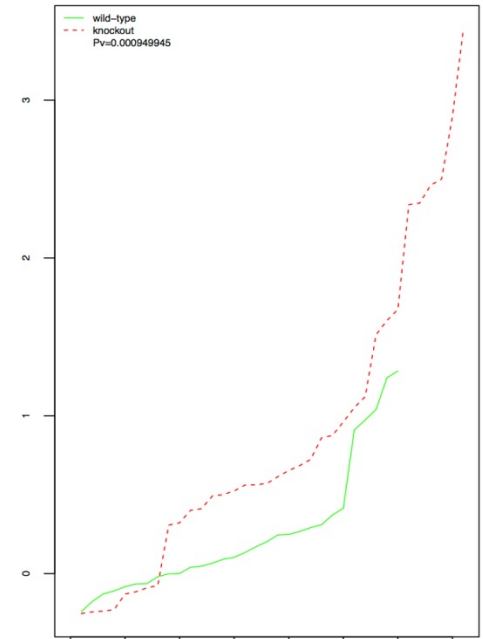

# Fig S18 MCAM

| Networks | Gene.a  | Gene.b   | Corr  | P        |
|----------|---------|----------|-------|----------|
| wt_pre   | MCAM    | Postn    | 0.84  | 0.04     |
| wt_pre   | MCAM    | Tnn      | 0.85  | 0.03     |
| wt_24hrs | MCAM    | Tnfrsf1a | 0.996 | 0.0003   |
| wt_24hrs | MCAM    | Tnn      | -0.91 | 0.03     |
| wt_24hrs | Eng1    | MCAM     | 0.92  | 0.03     |
| ko_pre   | MCAM    | Postn    | 0.81  | 0.049    |
| ko_pre   | MCAM    | PTHrP    | 0.91  | 0.01     |
| ko_pre   | MCAM    | Tbx4     | 0.82  | 0.04     |
| ko_pre   | MCAM    | Wnt7b    | 0.82  | 0.047    |
| ko_pre   | FGF2    | MCAM     | 0.85  | 0.03     |
| ko_24hrs | MCAM    | Notch2   | 0.92  | 0.008    |
| ko_24hrs | MCAM    | Postn    | 0.94  | 0.005    |
| ko_24hrs | MCAM    | TRalpha  | 0.99  | 0.0003   |
| ko_24hrs | MCAM    | Wsb1     | 0.92  | 0.009    |
| ko_24hrs | Adipor1 | MCAM     | 0.99  | 4.54E-05 |
| ko_24hrs | Bmp3    | MCAM     | 0.92  | 0.008    |

## Wild-type

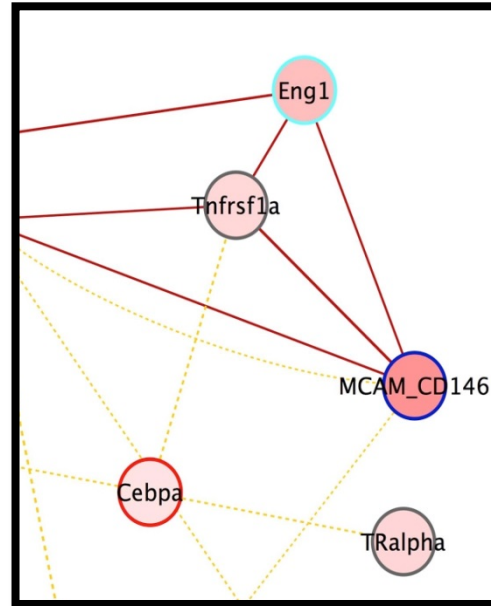

## Knockout

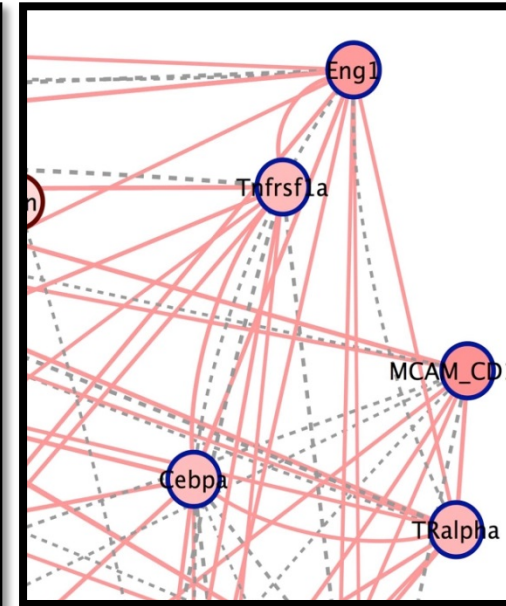

pre pre post post

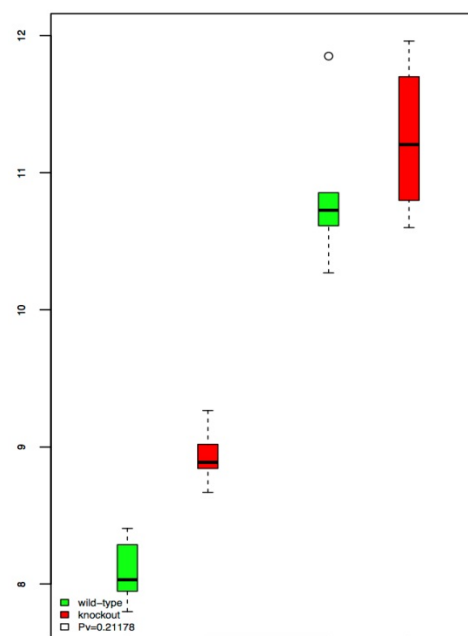

Differential Expression

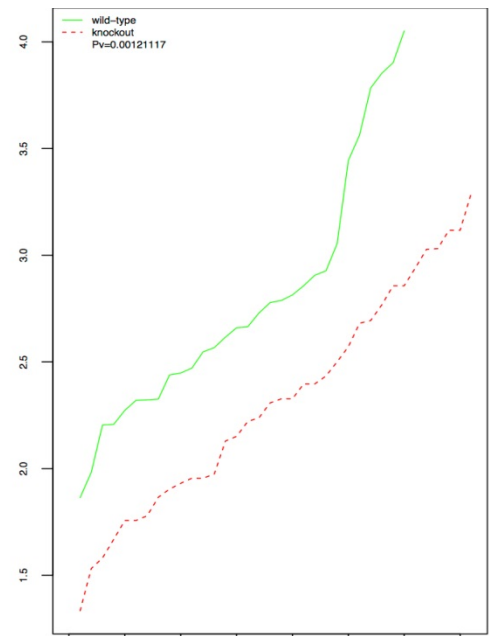

# Fig S19 MMP9

| Networks | Gene.a | Gene.b | Corr  | P     |
|----------|--------|--------|-------|-------|
| wt_pre   | NA     | NA     | NA    | NA    |
| wt_24hrs | Igf1r  | MMP9   | 0.93  | 0.02  |
| ko_pre   | MMP9   | Notch2 | 0.87  | 0.02  |
| ko_pre   | MMP9   | Postn  | -0.83 | 0.04  |
| ko_pre   | MMP9   | PTHrP  | -0.82 | 0.047 |
| ko_pre   | Cebpa  | MMP9   | 0.94  | 0.006 |
| ko_pre   | Dkk1   | MMP9   | -0.83 | 0.04  |
| ko_pre   | FGF2   | MMP9   | -0.87 | 0.02  |
| ko_pre   | Igf1r  | MMP9   | 0.82  | 0.045 |
| ko_24hrs | NA     | NA     | NA    | NA    |

Wild-type

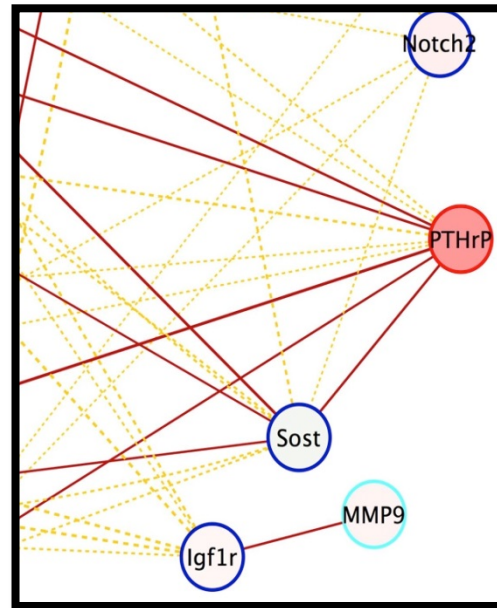

Knockout

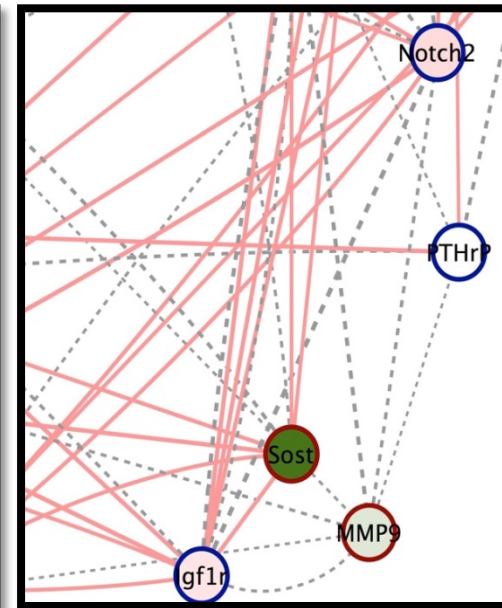

pre pre post post

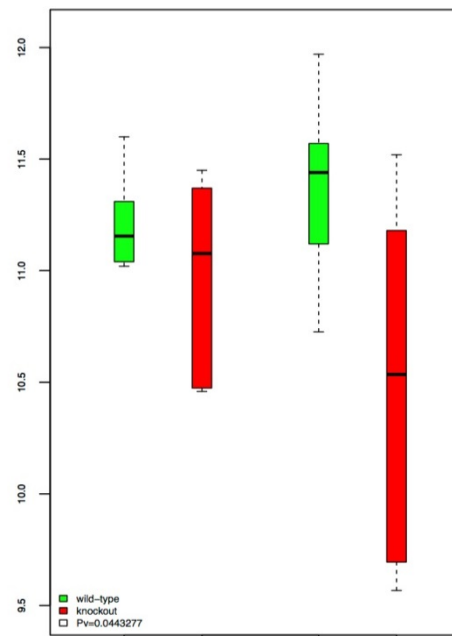

Differential Expression

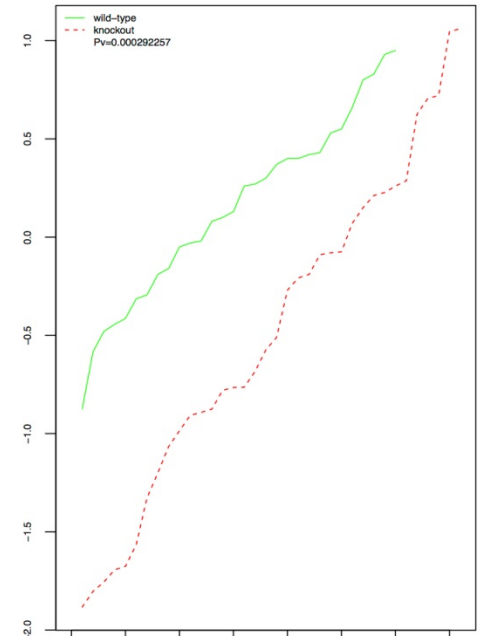

# Fig S20 Myod

| Networks | Gene.a | Gene.b   | Corr  | P      |
|----------|--------|----------|-------|--------|
| wt_pre   | Myod   | PTHrP    | 0.94  | 0.005  |
| wt_24hrs | Myod   | Tnn      | -0.89 | 0.046  |
| wt_24hrs | FGF2   | Myod     | 0.94  | 0.02   |
| ko_pre   | NA     | NA       | NA    | NA     |
| ko_24hrs | Myod   | Pparg    | 0.94  | 0.005  |
| ko_24hrs | Myod   | Sost     | 0.93  | 0.007  |
| ko_24hrs | Myod   | Tnfrsf1a | 0.96  | 0.003  |
| ko_24hrs | Igf1r  | Myod     | 0.98  | 0.0005 |
| ko_24hrs | Cebpa  | Myod     | 0.96  | 0.003  |
| ko_24hrs | Eng1   | Myod     | 0.92  | 0.01   |

## Wild-type

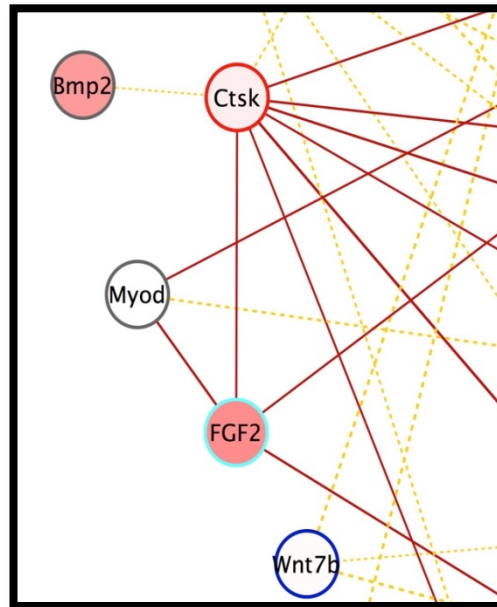

## Knockout

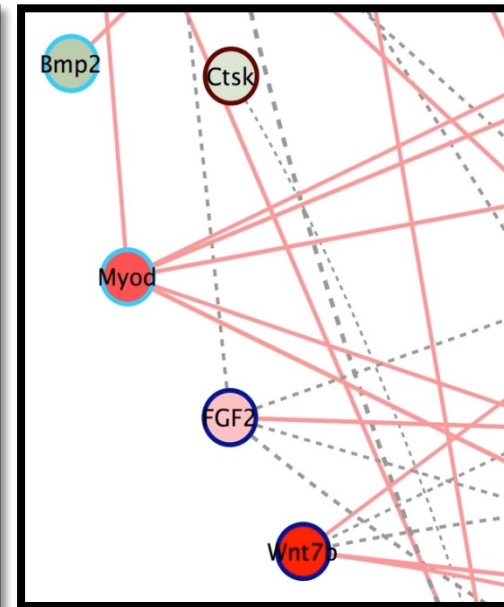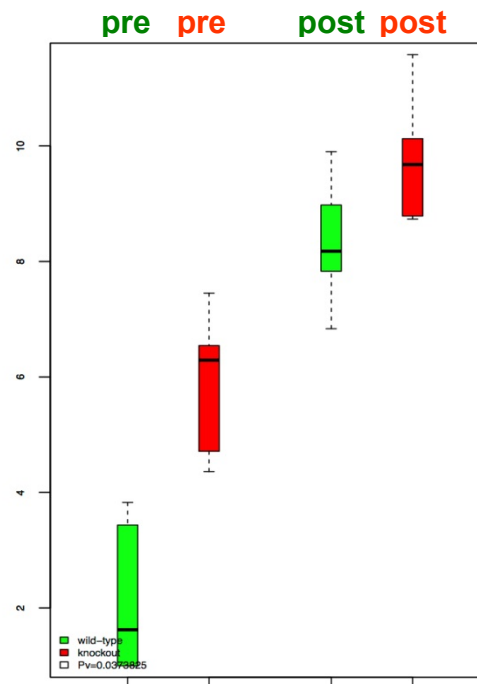

## Differential Expression

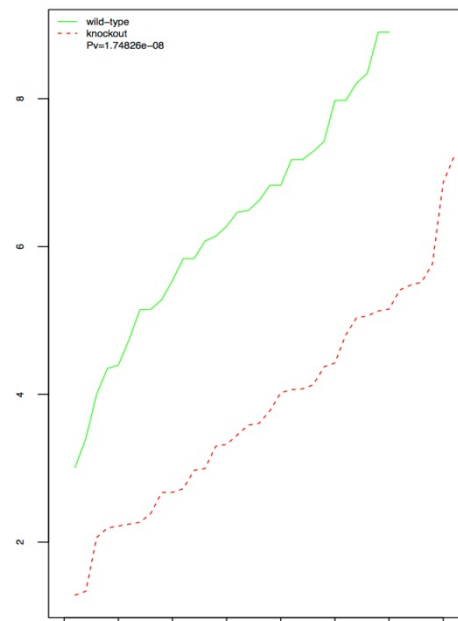

# Fig S21 Notch2

| Networks | Gene.a     | Gene.b   | Corr  | P        |
|----------|------------|----------|-------|----------|
| wt_pre   | Notch2     | Postn    | -0.81 | 0.048    |
| wt_pre   | Notch2     | Sost     | -0.83 | 0.04     |
| wt_pre   | Notch2     | Tnn      | -0.83 | 0.04     |
| wt_pre   | Bmp3       | Notch2   | -0.83 | 0.04     |
| wt_pre   | Dkk1       | Notch2   | -0.84 | 0.04     |
| wt_24hrs | NA         | NA       | NA    | NA       |
| ko_pre   | Notch2     | Pparg    | -0.85 | 0.03     |
| ko_pre   | Notch2     | Tnfrsf1a | 0.93  | 0.008    |
| ko_pre   | Cebpa      | Notch2   | 0.89  | 0.01     |
| ko_pre   | Igf1r      | Notch2   | 0.99  | 7.55E-05 |
| ko_pre   | MMP9       | Notch2   | 0.87  | 0.02     |
| ko_24hrs | Notch2     | Postn    | 0.94  | 0.005    |
| ko_24hrs | Notch2     | Pparg    | 0.91  | 0.01     |
| ko_24hrs | Notch2     | TRalpha  | 0.95  | 0.003    |
| ko_24hrs | Adipoq     | Notch2   | -0.91 | 0.01     |
| ko_24hrs | Adipor1    | Notch2   | 0.95  | 0.004    |
| ko_24hrs | Bmp3       | Notch2   | 0.98  | 0.0006   |
| ko_24hrs | Eng1       | Notch2   | 0.93  | 0.008    |
| ko_24hrs | MCAM_CD146 | Notch2   | 0.92  | 0.008    |

## Wild-type

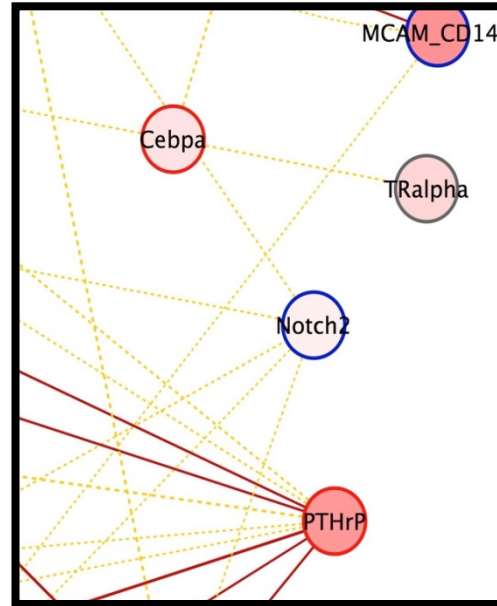

## Knockout

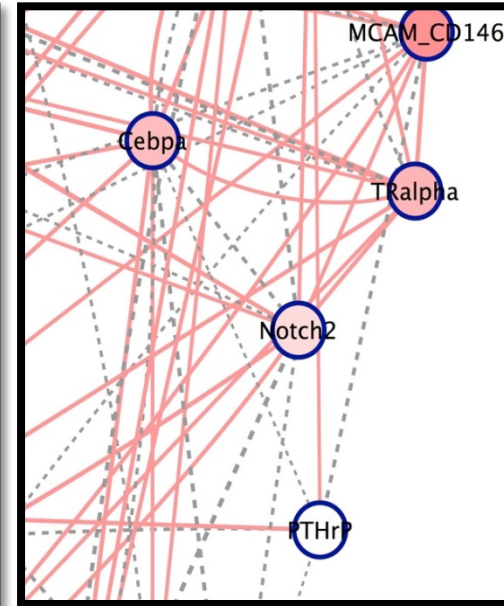

pre pre post post

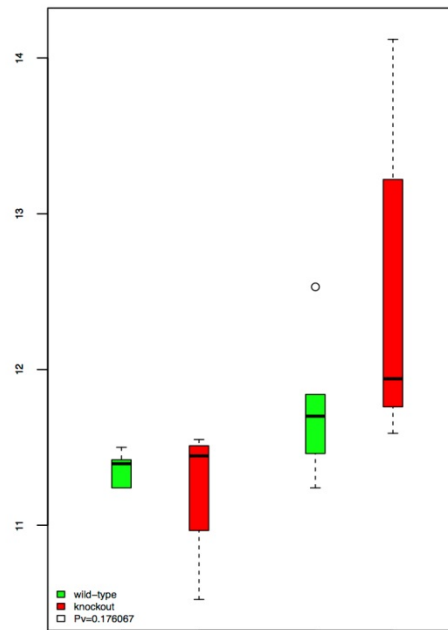

Differential Expression

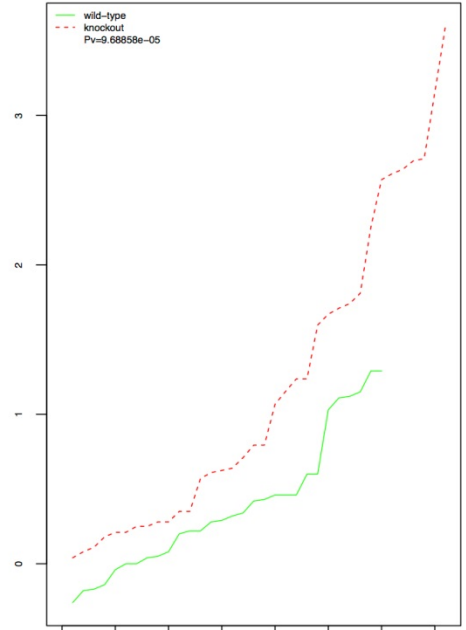

# Fig S22 Postn

| Networks | Gene.a  | Gene.b  | Corr  | P      |
|----------|---------|---------|-------|--------|
| wt_pre   | Postn   | Smad8   | 0.90  | 0.01   |
| wt_pre   | Postn   | Sost    | 0.89  | 0.02   |
| wt_pre   | Postn   | Tnn     | 0.99  | 0.0001 |
| wt_pre   | Bmp3    | Postn   | 0.84  | 0.04   |
| wt_pre   | Dkk1    | Postn   | 0.96  | 0.002  |
| wt_pre   | MCAM    | Postn   | 0.84  | 0.04   |
| wt_pre   | Notch2  | Postn   | -0.81 | 0.048  |
| wt_24hrs | Postn   | PTHrP   | -0.90 | 0.04   |
| wt_24hrs | Postn   | Tnn     | 0.95  | 0.01   |
| wt_24hrs | Ctsk    | Postn   | 0.98  | 0.004  |
| wt_24hrs | FGF2    | Postn   | -0.92 | 0.03   |
| ko_pre   | Postn   | Tbx4    | 0.87  | 0.02   |
| ko_pre   | FGF2    | Postn   | 0.90  | 0.01   |
| ko_pre   | MCAM    | Postn   | 0.81  | 0.048  |
| ko_pre   | MMP9    | Postn   | -0.83 | 0.04   |
| ko_24hrs | Postn   | Sost    | 0.92  | 0.008  |
| ko_24hrs | Postn   | TRAlpha | 0.93  | 0.008  |
| ko_24hrs | Postn   | Wsb1    | 0.91  | 0.01   |
| ko_24hrs | Adipor1 | Postn   | 0.94  | 0.006  |
| ko_24hrs | Bmp3    | Postn   | 0.95  | 0.004  |
| ko_24hrs | MCAM    | Postn   | 0.94  | 0.005  |
| ko_24hrs | Notch2  | Postn   | 0.94  | 0.005  |

## Wild-type

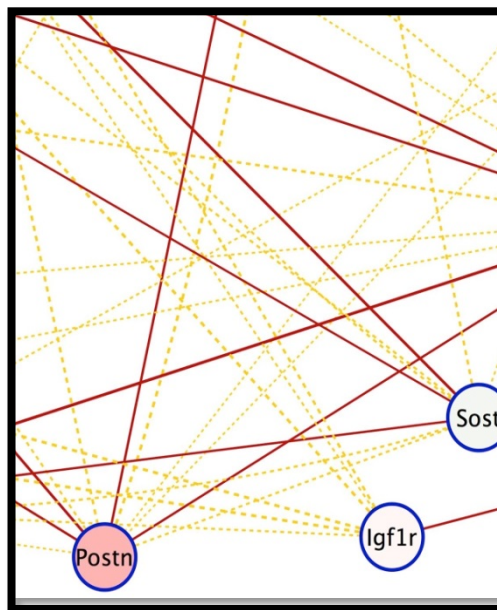

## Knockout

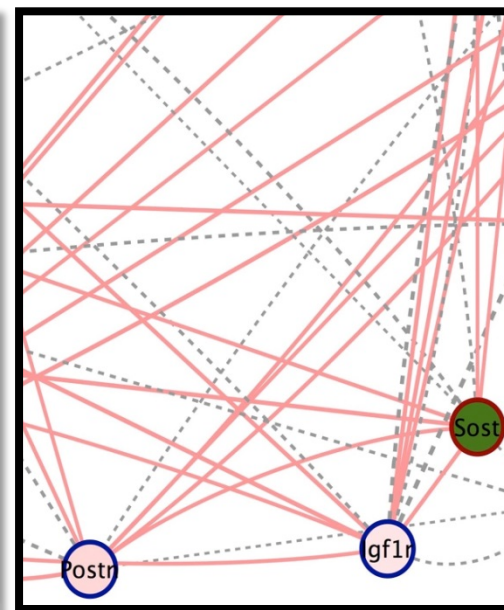

## pre pre post post

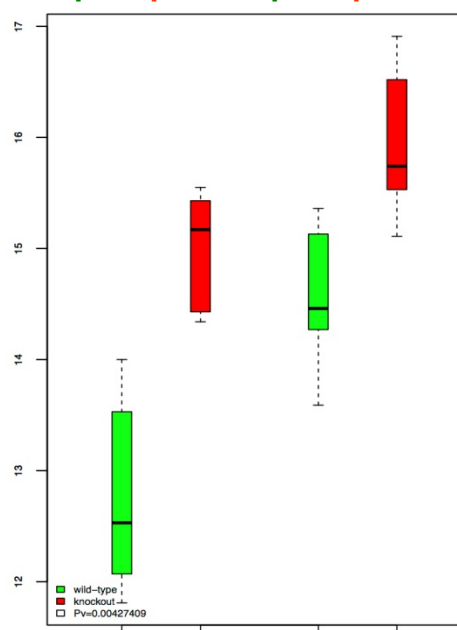

## Differential Expression

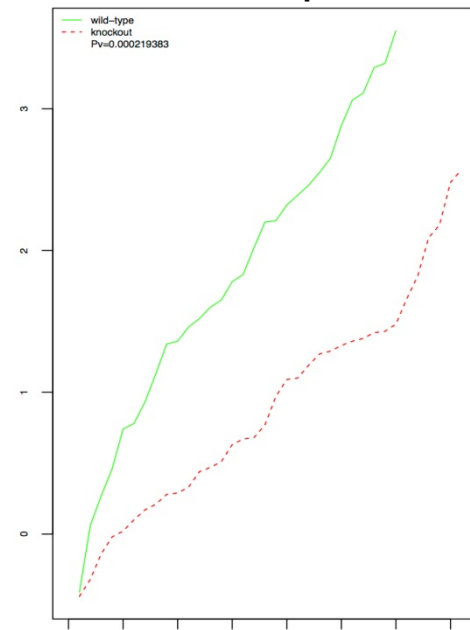

# Fig S23 Pparg

| Networks | Gene.a  | Gene.b   | Corr  | P        |
|----------|---------|----------|-------|----------|
| wt_pre   | Pparg   | Smad8    | 0.85  | 0.03     |
| wt_pre   | Pparg   | Wsb1     | -0.82 | 0.048    |
| wt_24hrs | NA      | NA       | NA    | NA       |
| ko_pre   | Pparg   | Tnfrsf1a | -0.96 | 0.002    |
| ko_pre   | Adipor1 | Pparg    | -0.85 | 0.03     |
| ko_pre   | Igf1r   | Pparg    | -0.89 | 0.02     |
| ko_pre   | Notch2  | Pparg    | -0.85 | 0.03     |
| ko_24hrs | Pparg   | Tnfrsf1a | 0.99  | 0.0001   |
| ko_24hrs | Pparg   | TRalpha  | 0.91  | 0.01     |
| ko_24hrs | Bmp3    | Pparg    | 0.97  | 0.002    |
| ko_24hrs | Cebpa   | Pparg    | 0.99  | 7.69E-05 |
| ko_24hrs | Eng1    | Pparg    | 0.995 | 3.39E-05 |
| ko_24hrs | Igf1r   | Pparg    | 0.96  | 0.002    |
| ko_24hrs | Myod    | Pparg    | 0.94  | 0.005    |
| ko_24hrs | Notch2  | Pparg    | 0.91  | 0.01     |

## Wild-type

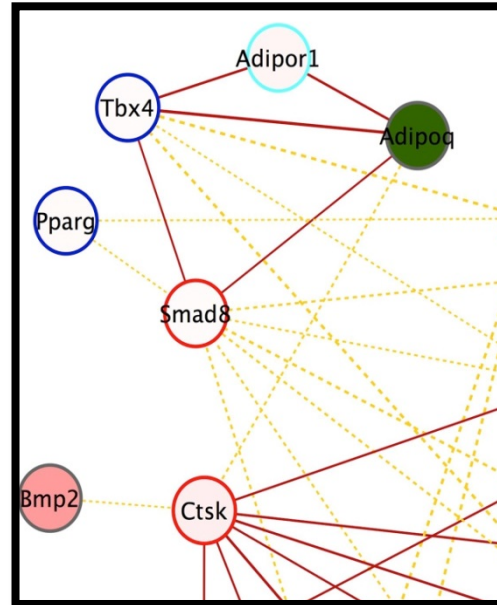

## Knockout

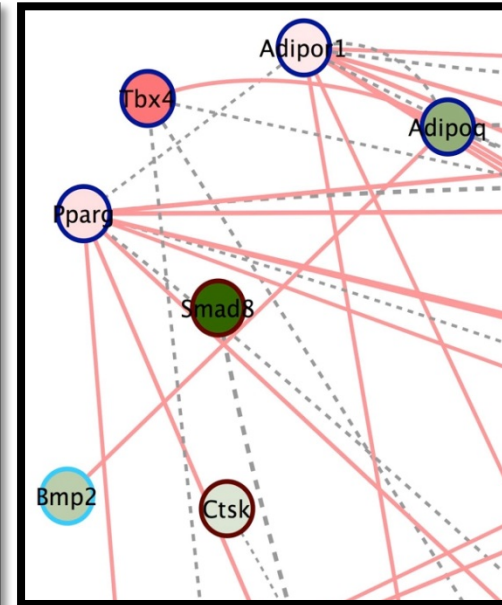

pre pre post post

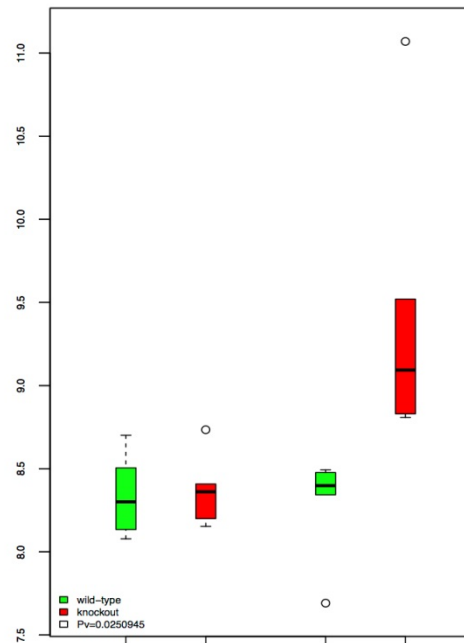

Differential Expression

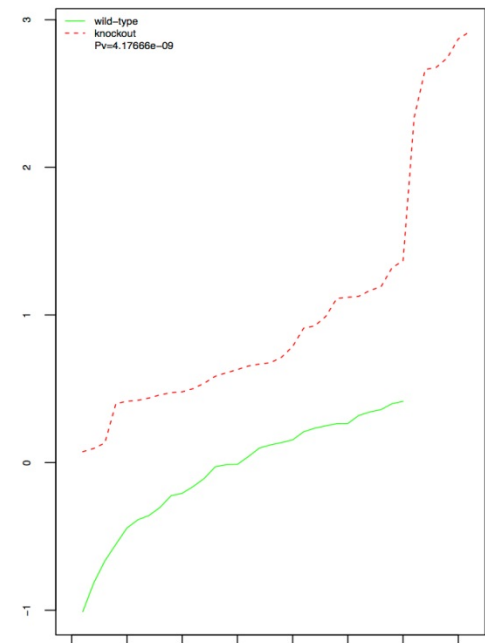



# Fig S24 PTHrP

| Networks | Gene.a | Gene.b | Corr   | P      |
|----------|--------|--------|--------|--------|
| wt_pre   | PTHrP  | Tbx4   | 0.86   | 0.03   |
| wt_pre   | PTHrP  | Wnt2b  | 0.86   | 0.03   |
| wt_pre   | PTHrP  | Wnt7b  | 0.86   | 0.03   |
| wt_pre   | PTHrP  | Wsb1   | -0.87  | 0.02   |
| wt_pre   | Myod   | PTHrP  | 0.94   | 0.005  |
| wt_24hrs | PTHrP  | Sost   | -0.93  | 0.02   |
| wt_24hrs | Bmp3   | PTHrP  | -0.997 | 0.0002 |
| wt_24hrs | Ctsk   | PTHrP  | -0.93  | 0.02   |
| wt_24hrs | Dkk1   | PTHrP  | -0.93  | 0.02   |
| wt_24hrs | Postn  | PTHrP  | -0.90  | 0.04   |
| ko_pre   | PTHrP  | Wnt7b  | 0.87   | 0.02   |
| ko_pre   | Cebpa  | PTHrP  | -0.83  | 0.04   |
| ko_pre   | MCAM   | PTHrP  | 0.91   | 0.01   |
| ko_pre   | MMP9   | PTHrP  | -0.82  | 0.047  |
| ko_24hrs | Eng1   | PTHrP  | -0.90  | 0.01   |
| ko_24hrs | FGF2   | PTHrP  | 0.96   | 0.003  |

## Wild-type

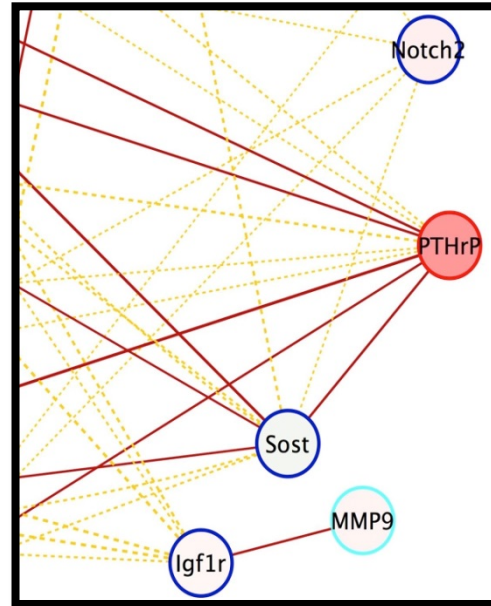

## Knockout

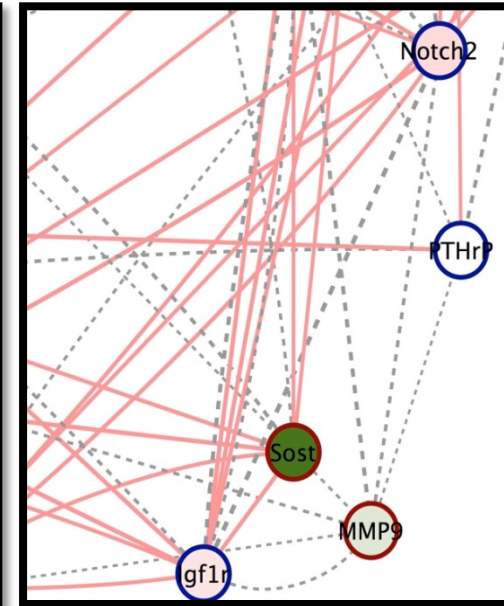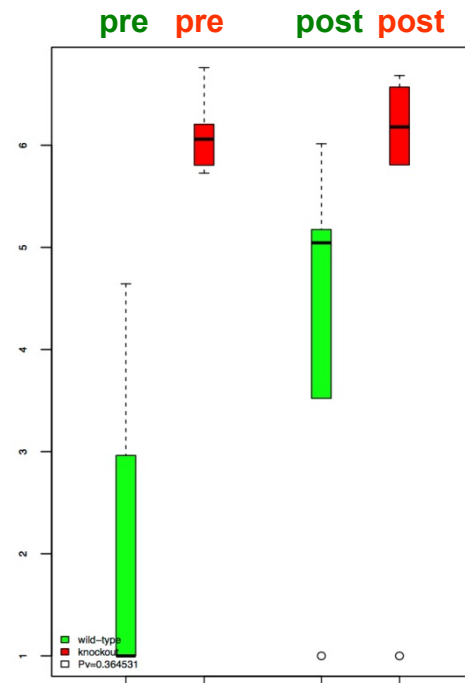

## Differential Expression

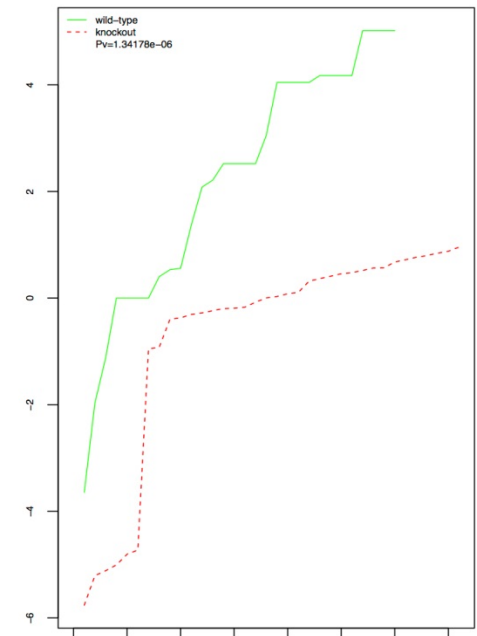

# Fig S25 Smad8

| Networks | Gene.a | Gene.b | Corr  | P        |
|----------|--------|--------|-------|----------|
| wt_pre   | Smad8  | Sost   | 0.91  | 0.01     |
| wt_pre   | Smad8  | Tnn    | 0.91  | 0.01     |
| wt_pre   | Bmp3   | Smad8  | 0.92  | 0.01     |
| wt_pre   | Cebpa  | Smad8  | -0.85 | 0.03     |
| wt_pre   | Dkk1   | Smad8  | 0.96  | 0.003    |
| wt_pre   | Postn  | Smad8  | 0.90  | 0.01     |
| wt_pre   | Pparg  | Smad8  | 0.85  | 0.03     |
| wt_24hrs | Smad8  | Tbx4   | 0.88  | 0.048    |
| wt_24hrs | Adipoq | Smad8  | 0.88  | 0.048    |
| ko_pre   | Bmp3   | Smad8  | 0.99  | 4.94E-05 |
| ko_24hrs | NA     | NA     | NA    | NA       |

## Wild-type

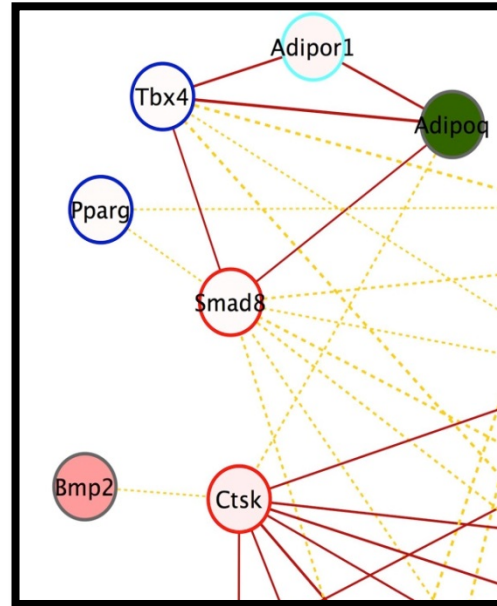

## Knockout

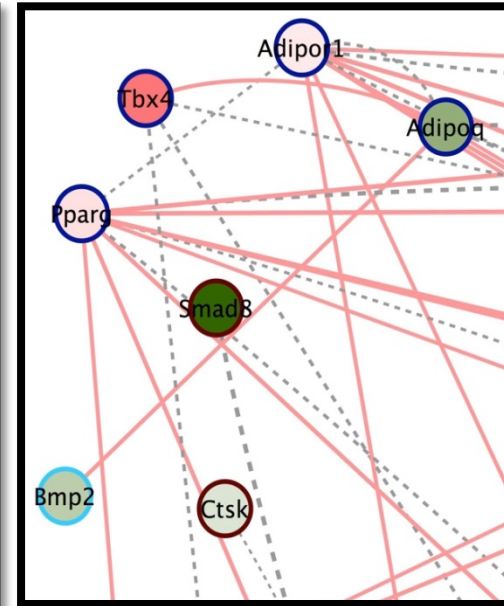

pre pre post post

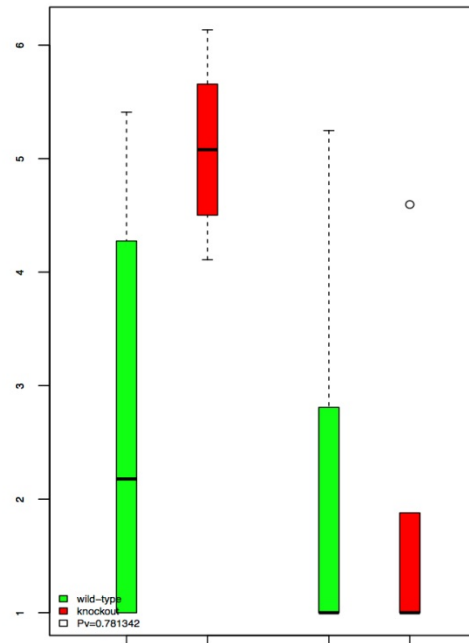

Differential Expression

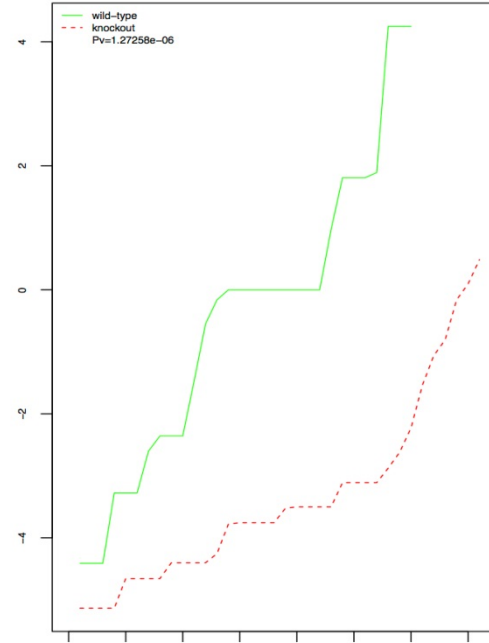

# Fig S26 Sost

| Networks | Gene.a | Gene.b   | Corr  | <i>P</i> |
|----------|--------|----------|-------|----------|
| wt_pre   | Sost   | Tnn      | 0.94  | 0.005    |
| wt_pre   | Bmp3   | Sost     | 0.90  | 0.01     |
| wt_pre   | Dkk1   | Sost     | 0.91  | 0.01     |
| wt_pre   | Notch2 | Sost     | -0.83 | 0.04     |
| wt_pre   | Postn  | Sost     | 0.89  | 0.02     |
| wt_pre   | Smad8  | Sost     | 0.91  | 0.01     |
| wt_24hrs | Bmp3   | Sost     | 0.91  | 0.03     |
| wt_24hrs | Ctsk   | Sost     | 0.90  | 0.04     |
| wt_24hrs | Dkk1   | Sost     | 0.99  | 0.0008   |
| wt_24hrs | PTHrP  | Sost     | -0.93 | 0.02     |
| ko_pre   | Sost   | Tnn      | 0.84  | 0.04     |
| ko_pre   | Dkk1   | Sost     | 0.90  | 0.02     |
| ko_24hrs | Sost   | Tnfrsf1a | 0.91  | 0.01     |
| ko_24hrs | Sost   | Wnt7b    | 0.96  | 0.002    |
| ko_24hrs | Cebpa  | Sost     | 0.91  | 0.01     |
| ko_24hrs | Igf1r  | Sost     | 0.95  | 0.004    |
| ko_24hrs | Myod   | Sost     | 0.93  | 0.007    |
| ko_24hrs | Postn  | Sost     | 0.92  | 0.008    |

## Wild-type

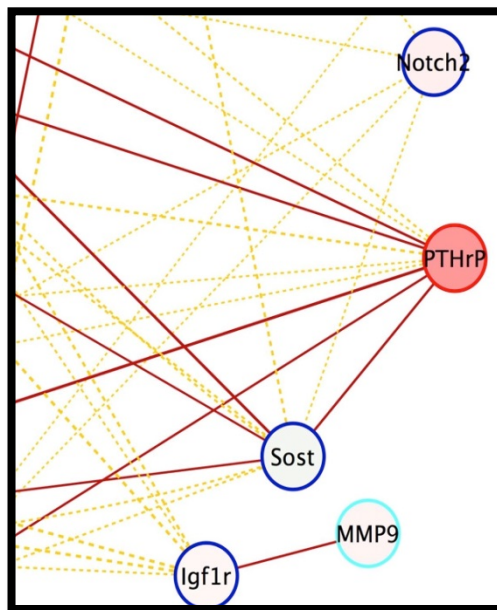

## Knockout

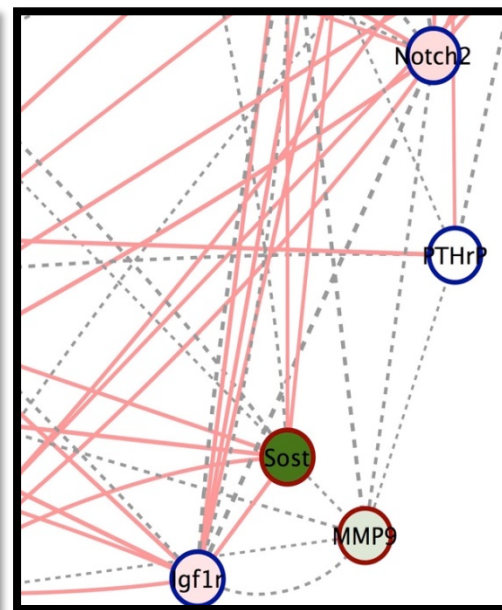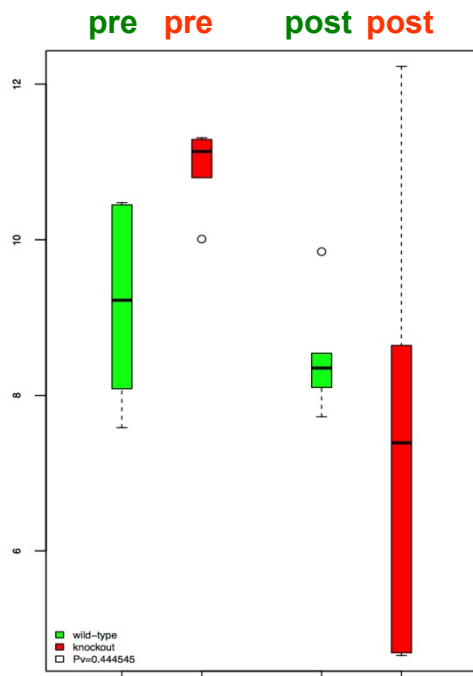

## Differential Expression

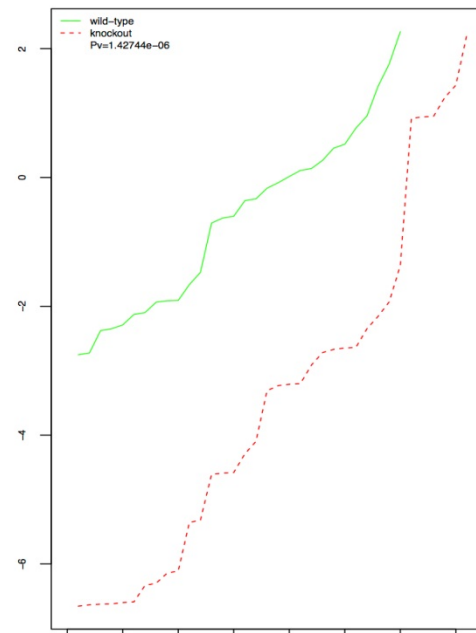

# Fig S27 Tbx4

| Networks | Gene.a  | Gene.b | Corr  | P        |
|----------|---------|--------|-------|----------|
| wt_pre   | Tbx4    | Wsb1   | -0.98 | 0.0008   |
| wt_pre   | Igf1r   | Tbx4   | -0.98 | 0.0008   |
| wt_pre   | PTHrP   | Tbx4   | 0.86  | 0.03     |
| wt_24hrs | Adipoq  | Tbx4   | 1     | 2.80E-09 |
| wt_24hrs | Adipor1 | Tbx4   | -0.93 | 0.0214   |
| wt_24hrs | Smad8   | Tbx4   | 0.88  | 0.0482   |
| ko_pre   | FGF2    | Tbx4   | 0.87  | 0.0246   |
| ko_pre   | MCAM    | Tbx4   | 0.82  | 0.0436   |
| ko_pre   | Postn   | Tbx4   | 0.87  | 0.0233   |
| ko_24hrs | Adipoq  | Tbx4   | -0.94 | 0.005    |

## Wild-type

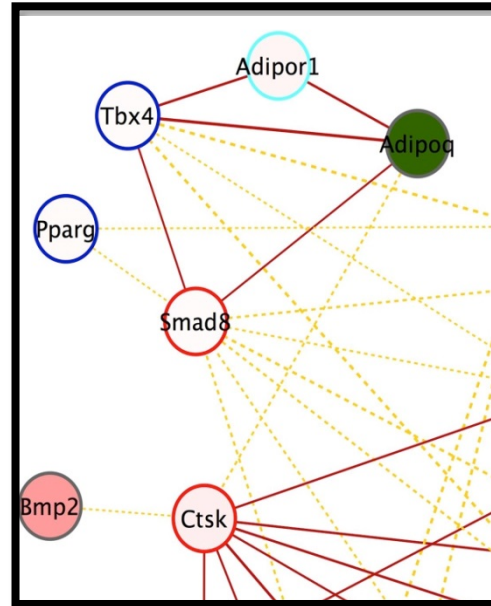

## Knockout

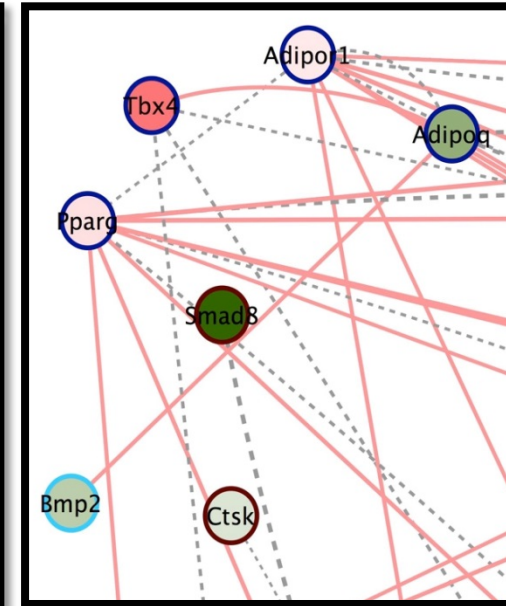

## pre pre post post

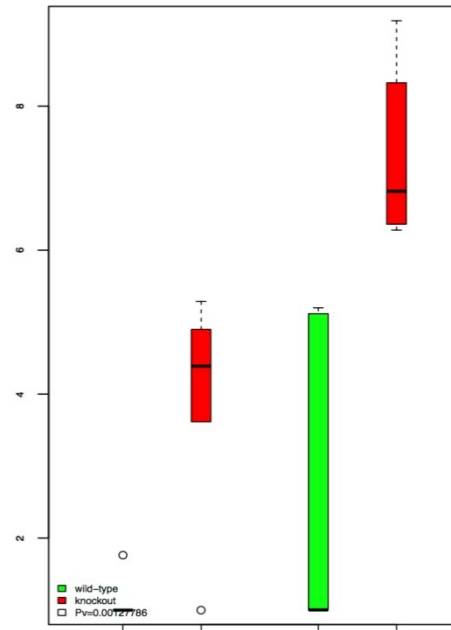

## Differential Expression

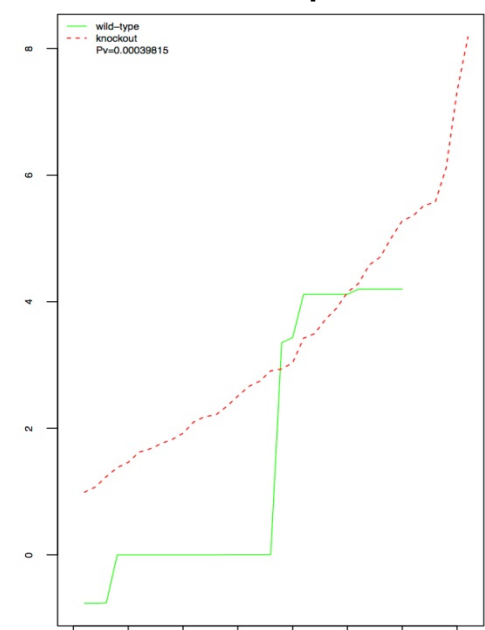

# Fig S28 Tnfrsf1a

| Networks | Gene.a   | Gene.b   | Corr  | P      |
|----------|----------|----------|-------|--------|
| wt_pre   | Cebpa    | Tnfrsf1a | 0.90  | 0.01   |
| wt_24hrs | Eng1     | Tnfrsf1a | 0.94  | 0.02   |
| wt_24hrs | MCAM     | Tnfrsf1a | 0.996 | 0.0003 |
| wt_24hrs | Tnfrsf1a | Tnn      | -0.89 | 0.04   |
| ko_pre   | Igf1r    | Tnfrsf1a | 0.95  | 0.004  |
| ko_pre   | Notch2   | Tnfrsf1a | 0.93  | 0.008  |
| ko_pre   | Pparg    | Tnfrsf1a | -0.96 | 0.002  |
| ko_24hrs | Tnfrsf1a | Wnt7b    | 0.91  | 0.01   |
| ko_24hrs | Bmp3     | Tnfrsf1a | 0.95  | 0.004  |
| ko_24hrs | Cebpa    | Tnfrsf1a | 0.98  | 0.0006 |
| ko_24hrs | Eng1     | Tnfrsf1a | 0.98  | 0.0009 |
| ko_24hrs | Igf1r    | Tnfrsf1a | 0.96  | 0.002  |
| ko_24hrs | Myod     | Tnfrsf1a | 0.96  | 0.003  |
| ko_24hrs | Pparg    | Tnfrsf1a | 0.99  | 0.0001 |
| ko_24hrs | Sost     | Tnfrsf1a | 0.91  | 0.01   |

## Wild-type

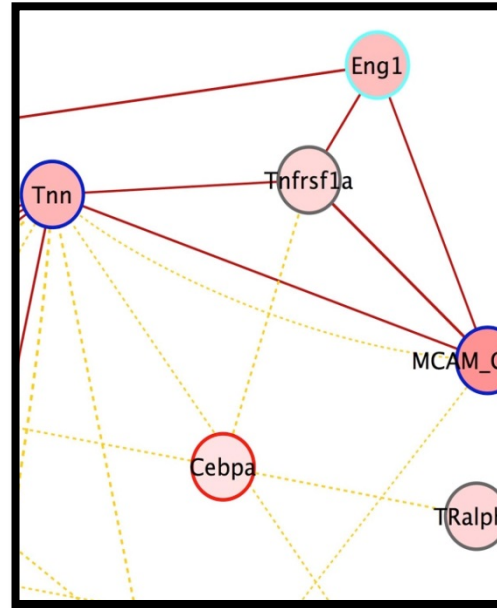

## Knockout

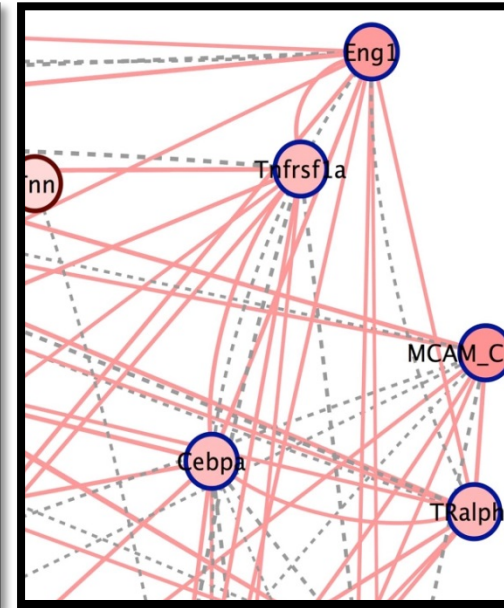

pre pre post post

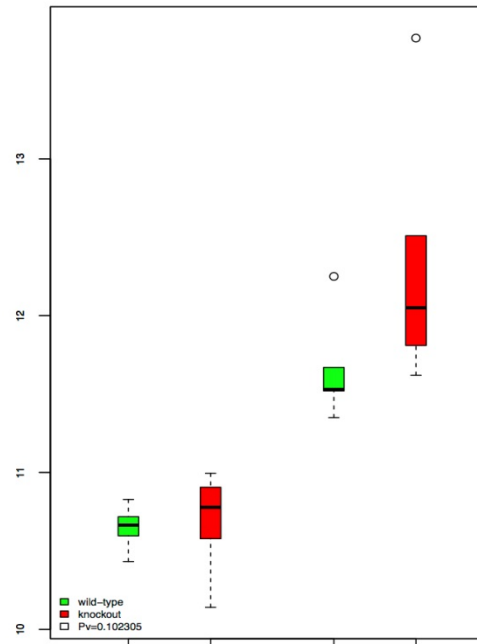

Differential Expression

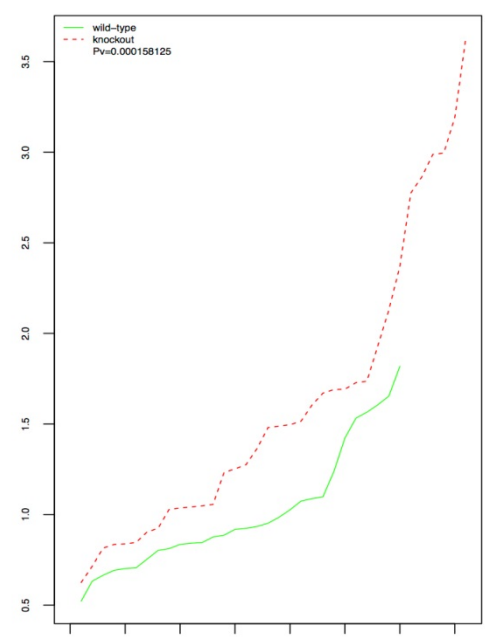

# Fig S29 Tnn

| Networks | Gene.a   | Gene.b | Corr  | P      |
|----------|----------|--------|-------|--------|
| wt_pre   | Bmp3     | Tnn    | 0.87  | 0.02   |
| wt_pre   | Dkk1     | Tnn    | 0.96  | 0.002  |
| wt_pre   | MCAM     | Tnn    | 0.85  | 0.03   |
| wt_pre   | Notch2   | Tnn    | -0.83 | 0.04   |
| wt_pre   | Postn    | Tnn    | 0.99  | 0.0001 |
| wt_pre   | Smad8    | Tnn    | 0.91  | 0.01   |
| wt_pre   | Sost     | Tnn    | 0.94  | 0.005  |
| wt_24hrs | Ctsk     | Tnn    | 0.91  | 0.03   |
| wt_24hrs | FGF2     | Tnn    | -0.89 | 0.04   |
| wt_24hrs | MCAM     | Tnn    | -0.91 | 0.03   |
| wt_24hrs | Myod     | Tnn    | -0.89 | 0.046  |
| wt_24hrs | Postn    | Tnn    | 0.95  | 0.01   |
| wt_24hrs | Tnfrsf1a | Tnn    | -0.89 | 0.04   |
| ko_pre   | Sost     | Tnn    | 0.84  | 0.04   |
| ko_24hrs | NA       | NA     | NA    | NA     |

## Wild-type

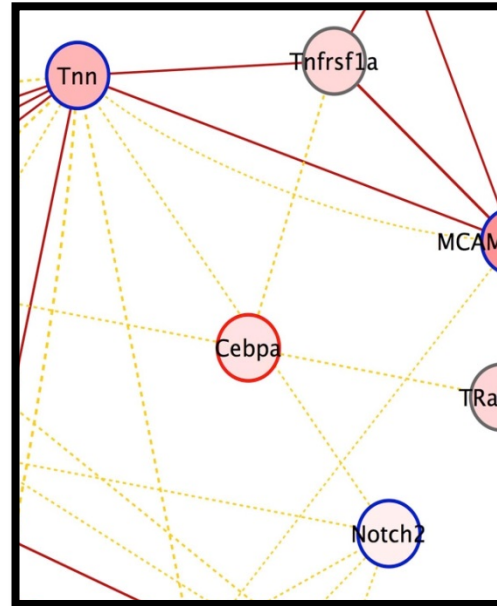

## Knockout

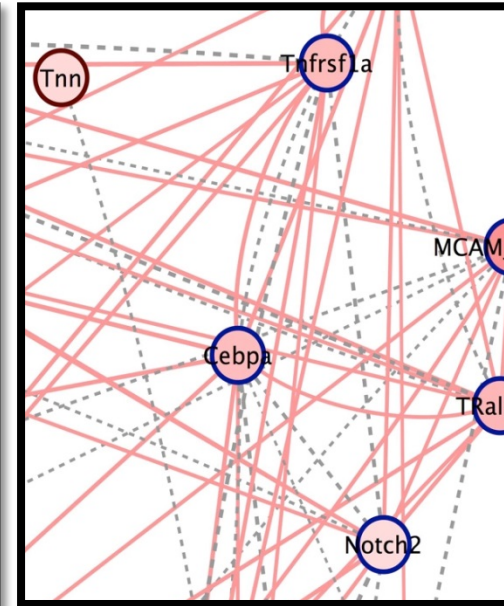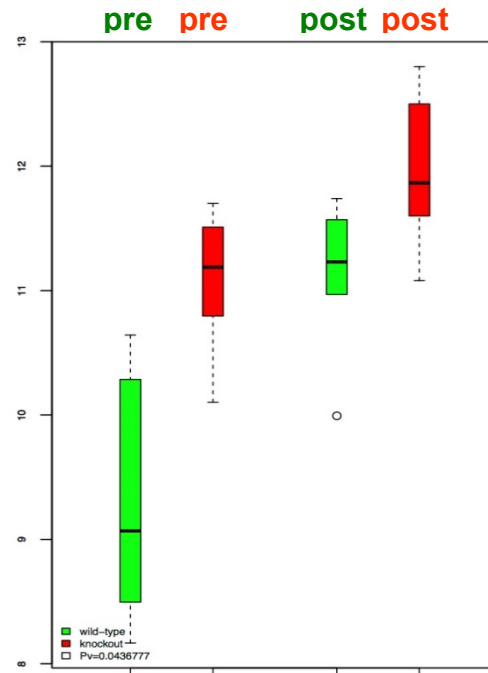

## Differential Expression

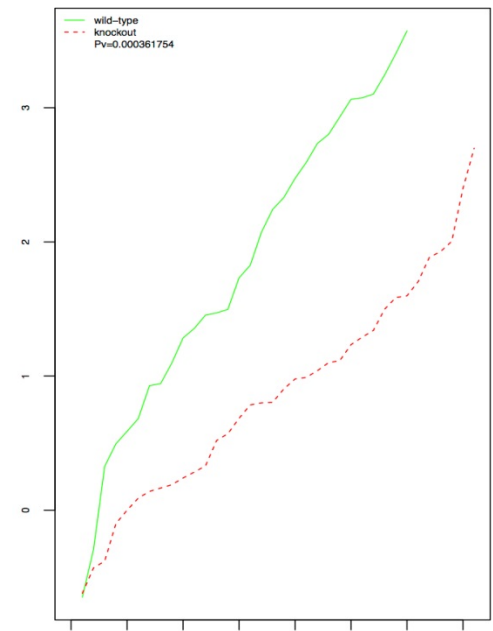

# Fig S30 TRalpha

| Networks | Gene.a  | Gene.b  | Corr  | P       |
|----------|---------|---------|-------|---------|
| wt_pre   | Cebpa   | TRalpha | 0.88  | 0.02    |
| wt_24hrs | NA      | NA      | NA    | NA      |
| ko_pre   | Adipoq  | TRalpha | -0.94 | 0.005   |
| ko_pre   | Adipor1 | TRalpha | 0.84  | 0.04    |
| ko_pre   | Eng1    | TRalpha | 0.85  | 0.03    |
| ko_24hrs | TRalpha | Wsb1    | 0.90  | 0.01    |
| ko_24hrs | Adipor1 | TRalpha | 0.997 | 1.2E-05 |
| ko_24hrs | Bmp3    | TRalpha | 0.96  | 0.002   |
| ko_24hrs | Cebpa   | TRalpha | 0.91  | 0.01    |
| ko_24hrs | Eng1    | TRalpha | 0.93  | 0.007   |
| ko_24hrs | MCAM    | TRalpha | 0.99  | 0.0003  |
| ko_24hrs | Notch2  | TRalpha | 0.95  | 0.003   |
| ko_24hrs | Postn   | TRalpha | 0.93  | 0.008   |
| ko_24hrs | Pparg   | TRalpha | 0.91  | 0.01    |

## Wild-type

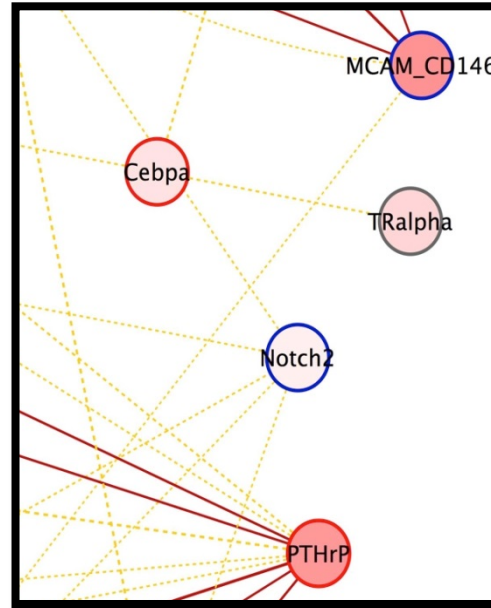

## Knockout

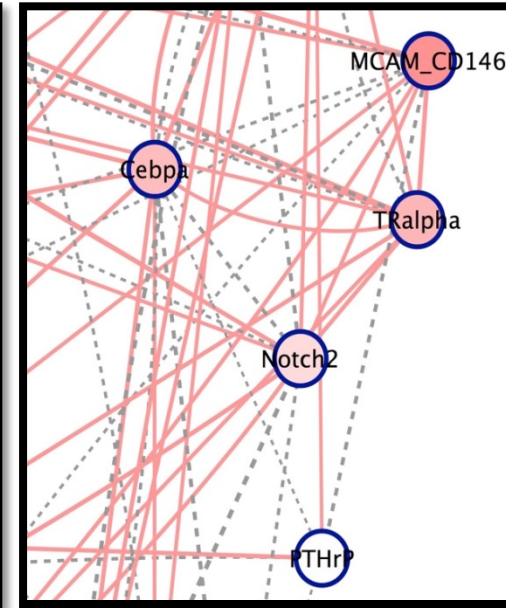

pre pre post post

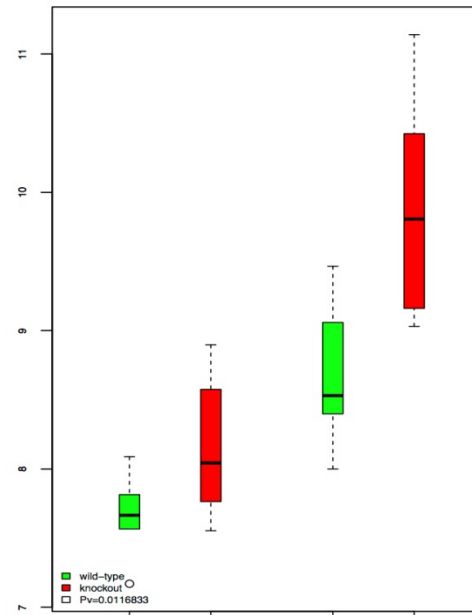

Differential Expression

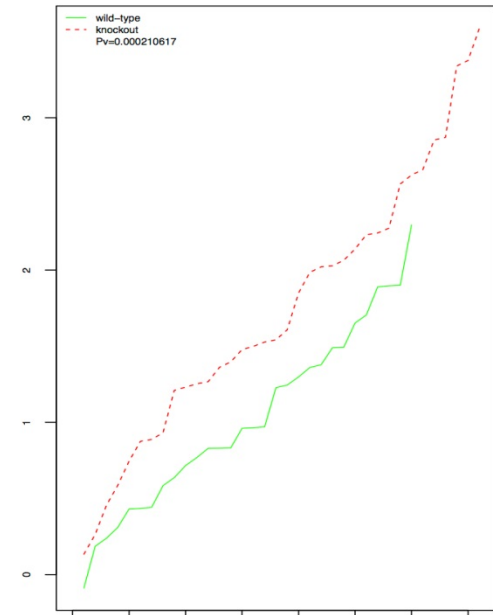

# Fig S31 Wnt2b

| Networks | Gene.a | Gene.b | Corr  | P      |
|----------|--------|--------|-------|--------|
| wt_pre   | Wnt2b  | Wsb1   | -0.98 | 0.0008 |
| wt_pre   | Igf1r  | Wnt2b  | -0.98 | 0.0008 |
| wt_pre   | PTHrP  | Wnt2b  | 0.86  | 0.03   |
| wt_24hrs | NA     | NA     | NA    | NA     |
| ko_pre   | NA     | NA     | NA    | NA     |
| ko_24hrs | NA     | NA     | NA    | NA     |

## Wild-type

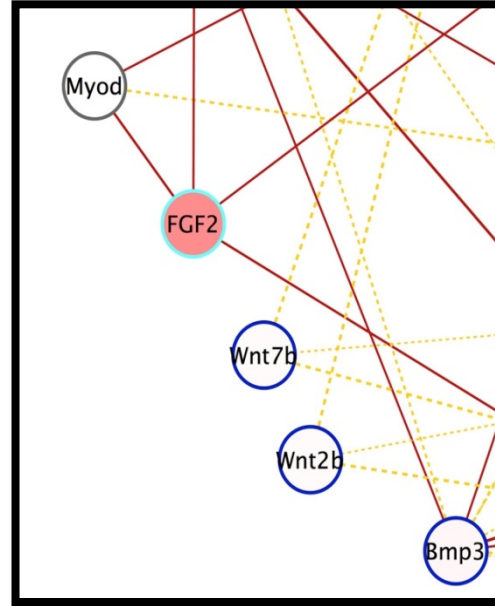

## Knockout

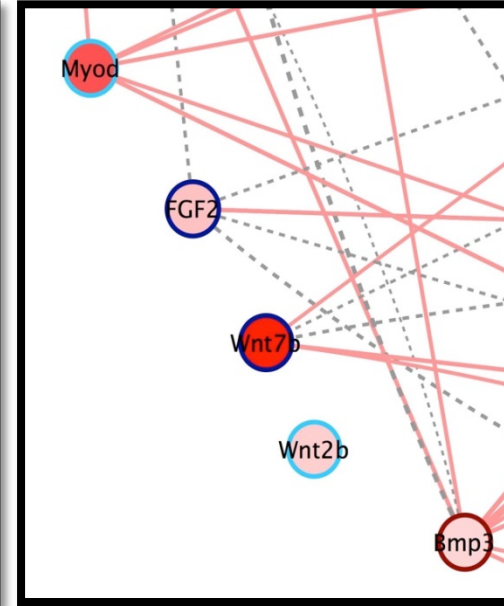

pre pre post post

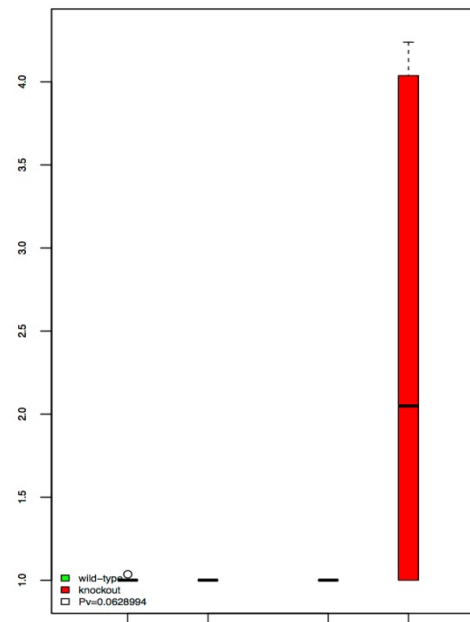

Differential Expression

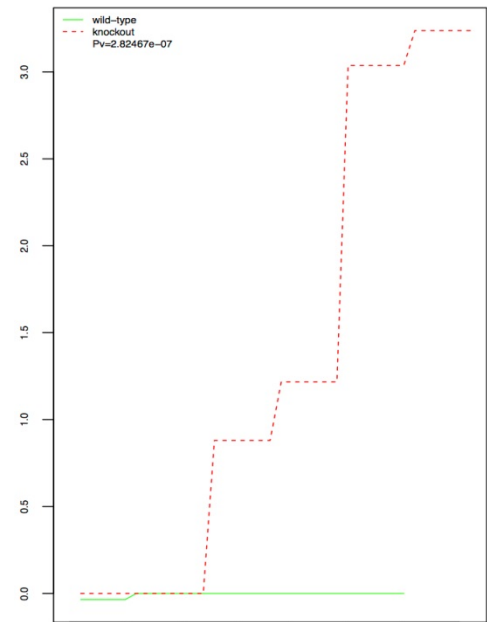



# Fig S32 Wnt7b

| Networks | Gene.a   | Gene.b | Corr  | P      |
|----------|----------|--------|-------|--------|
| wt_pre   | Wnt7b    | Wsb1   | -0.98 | 0.0008 |
| wt_pre   | Igf1r    | Wnt7b  | -0.98 | 0.0008 |
| wt_pre   | PTHrP    | Wnt7b  | 0.86  | 0.03   |
| wt_24hrs | NA       | NA     | NA    | NA     |
| ko_pre   | MCAM     | Wnt7b  | 0.82  | 0.047  |
| ko_pre   | PTHrP    | Wnt7b  | 0.87  | 0.03   |
| ko_24hrs | Igf1r    | Wnt7b  | 0.92  | 0.01   |
| ko_24hrs | Sost     | Wnt7b  | 0.96  | 0.002  |
| ko_24hrs | Tnfrsf1a | Wnt7b  | 0.91  | 0.01   |

## Wild-type

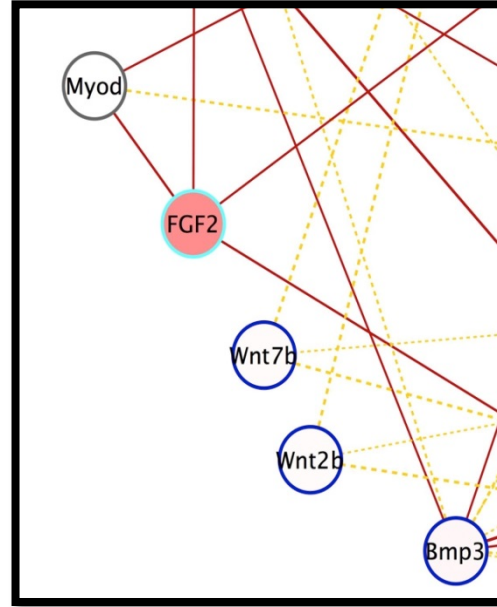

## Knockout

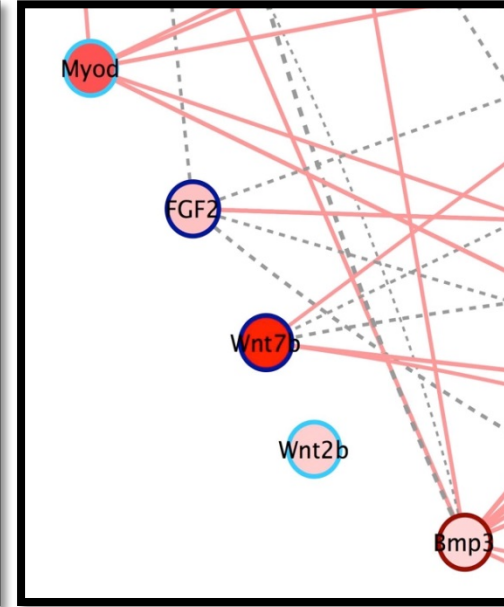

pre pre post post

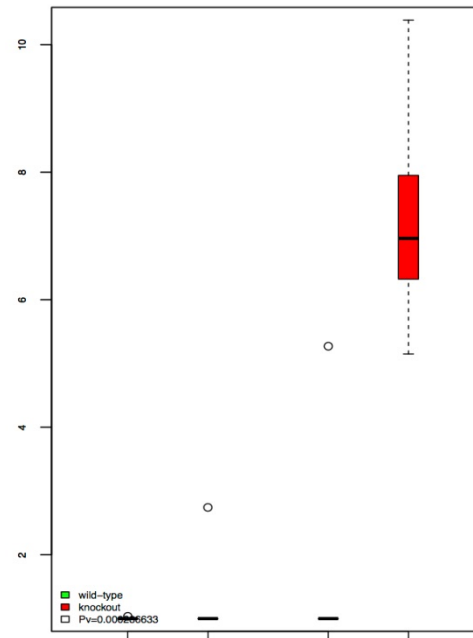

### Differential Expression

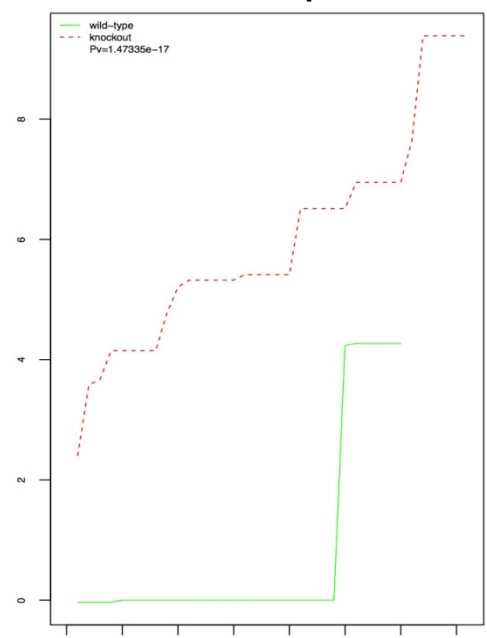

# Fig S33 Wsb1

| Networks | Gene.a  | Gene.b | Corr  | P      |
|----------|---------|--------|-------|--------|
| wt_pre   | Wnt7b   | Wsb1   | -0.98 | 0.0008 |
| wt_pre   | Wnt2b   | Wsb1   | -0.98 | 0.0008 |
| wt_pre   | Igf1r   | Wsb1   | 0.95  | 0.004  |
| wt_pre   | Pparg   | Wsb1   | -0.82 | 0.048  |
| wt_pre   | PTHrP   | Wsb1   | -0.87 | 0.02   |
| wt_pre   | Tbx4    | Wsb1   | -0.98 | 0.0008 |
| wt_24hrs | TRalpha | Wsb1   | 0.90  | 0.01   |
| ko_pre   | NA      | NA     | NA    | NA     |
| ko_24hrs | Adipor1 | Wsb1   | 0.91  | 0.01   |
| ko_24hrs | MCAM    | Wsb1   | 0.92  | 0.009  |
| ko_24hrs | Postn   | Wsb1   | 0.91  | 0.01   |
| ko_24hrs | TRalpha | Wsb1   | 0.90  | 0.01   |

## Wild-type

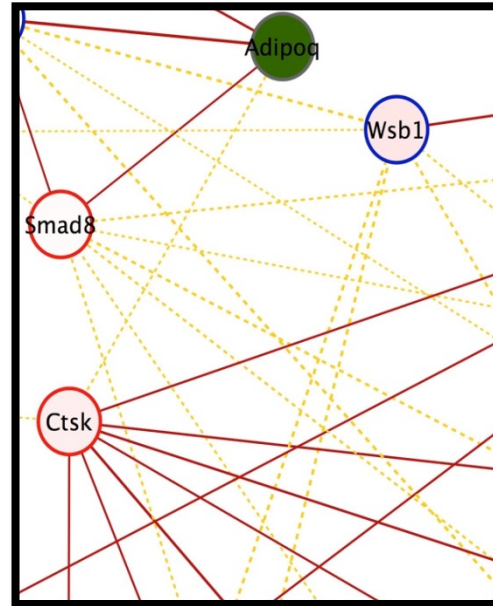

## Knockout

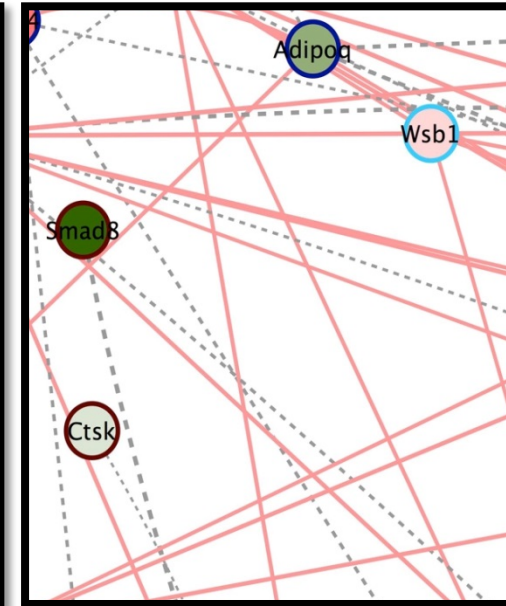

pre pre post post

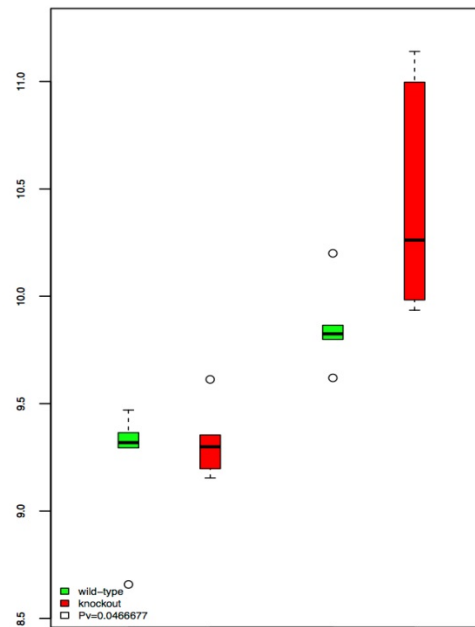

Differential Expression

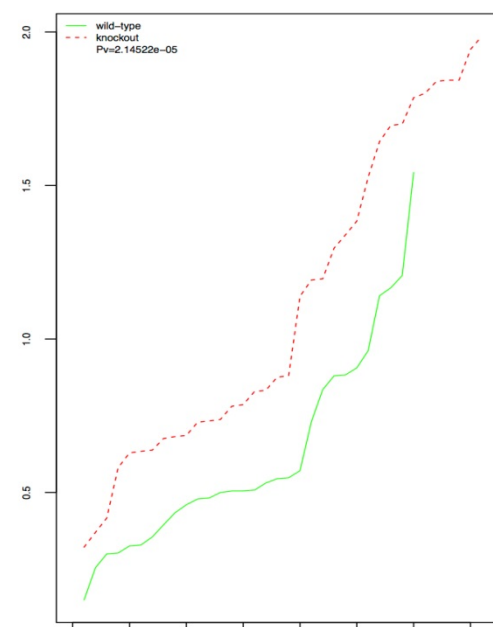

### Actr2b(Acvr2b)

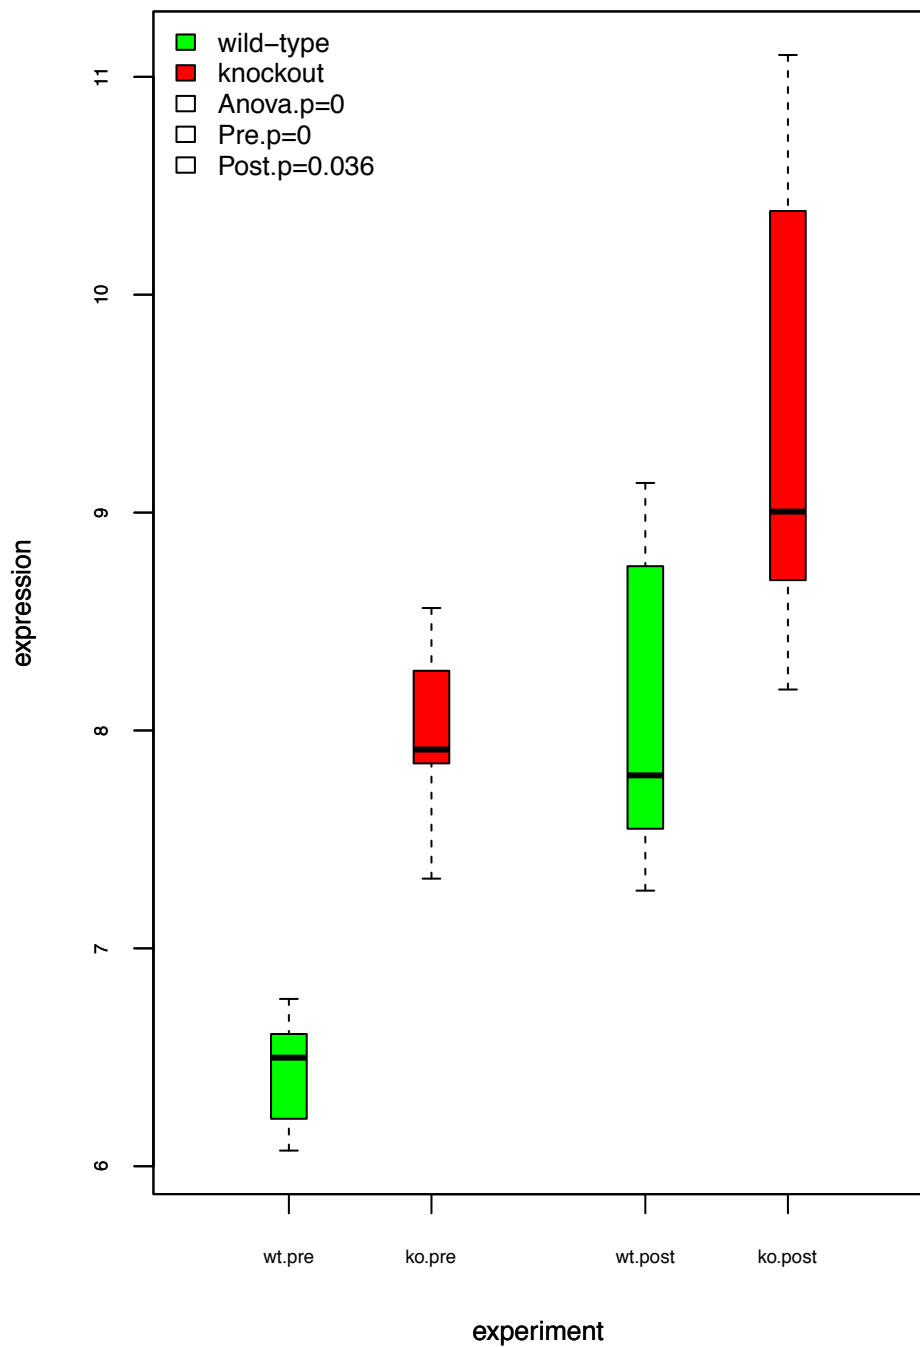

### Actr2b(Acvr2b)

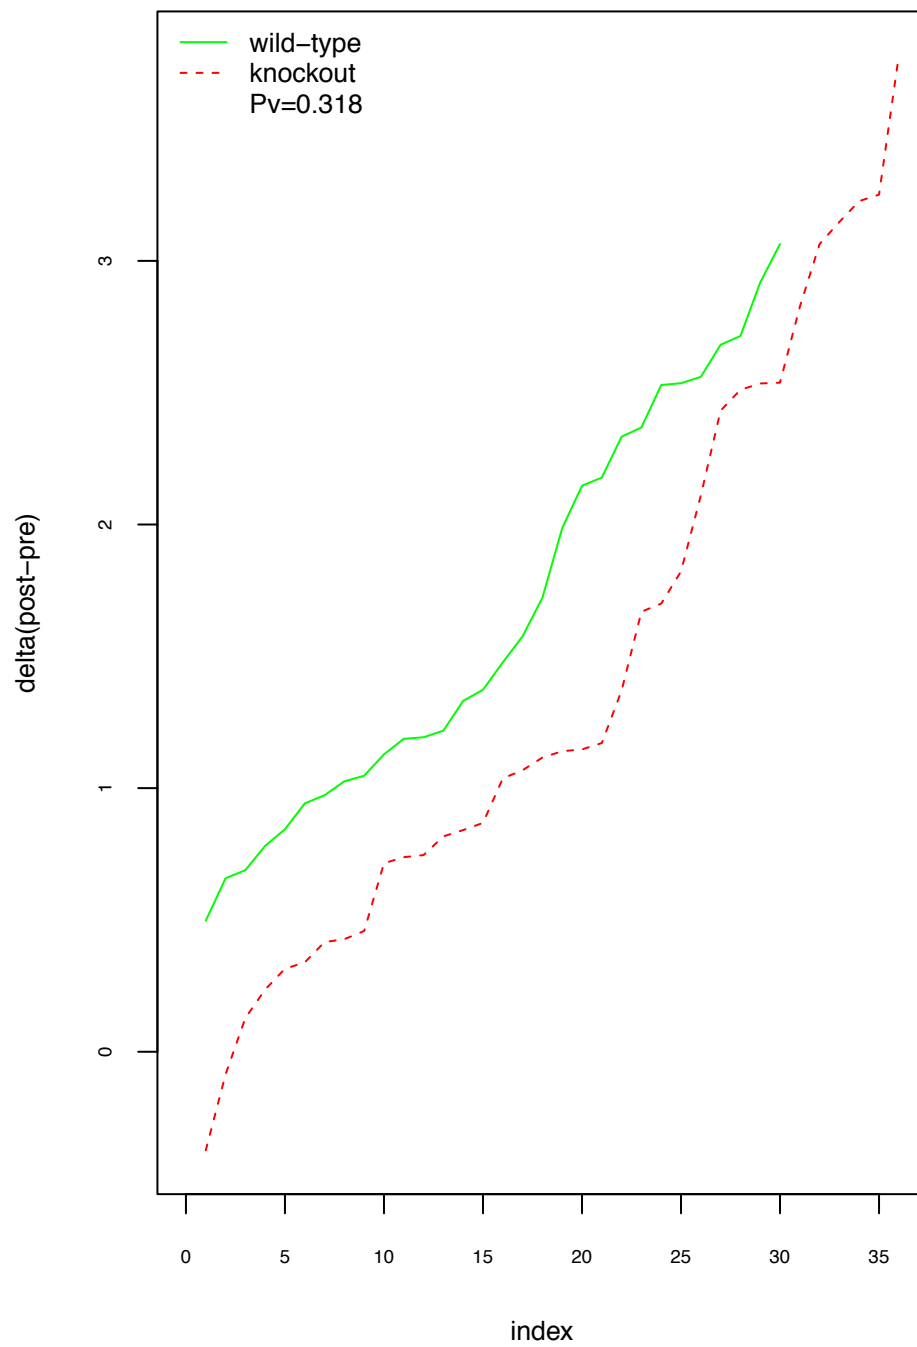

### Actr2a(Acvr2a)

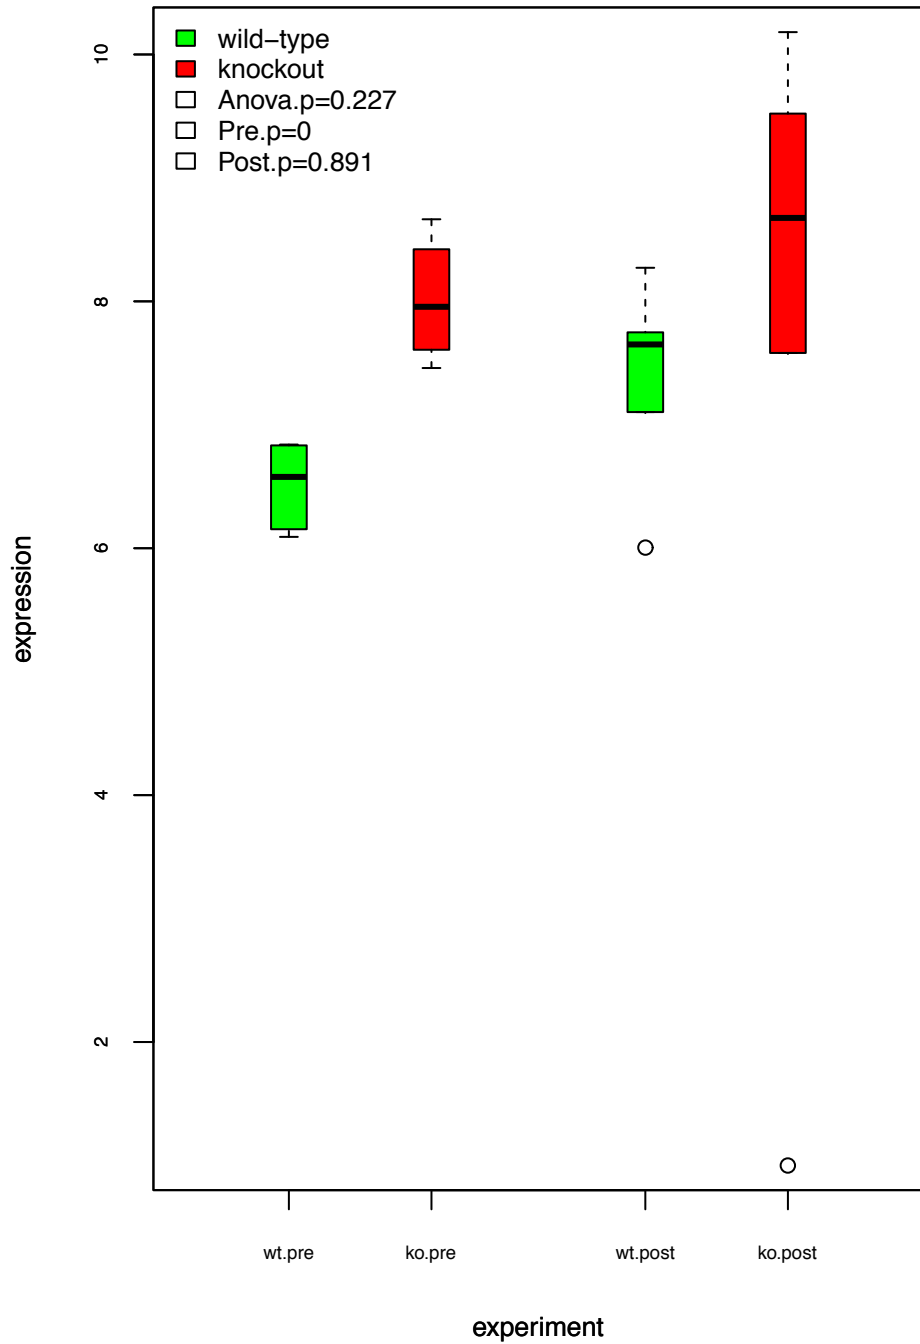

### Actr2a(Acvr2a)

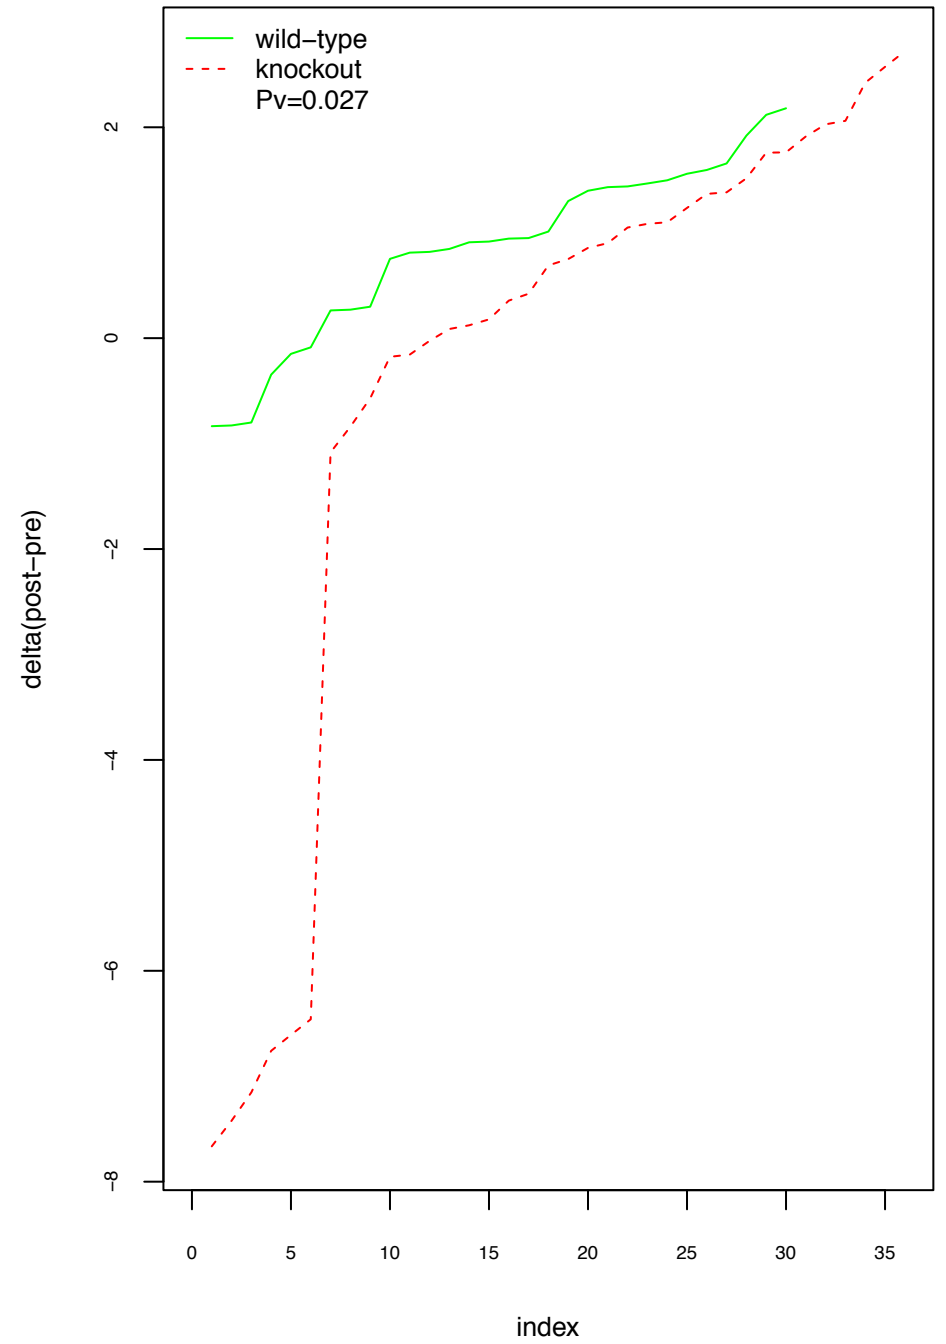

### ActivinB

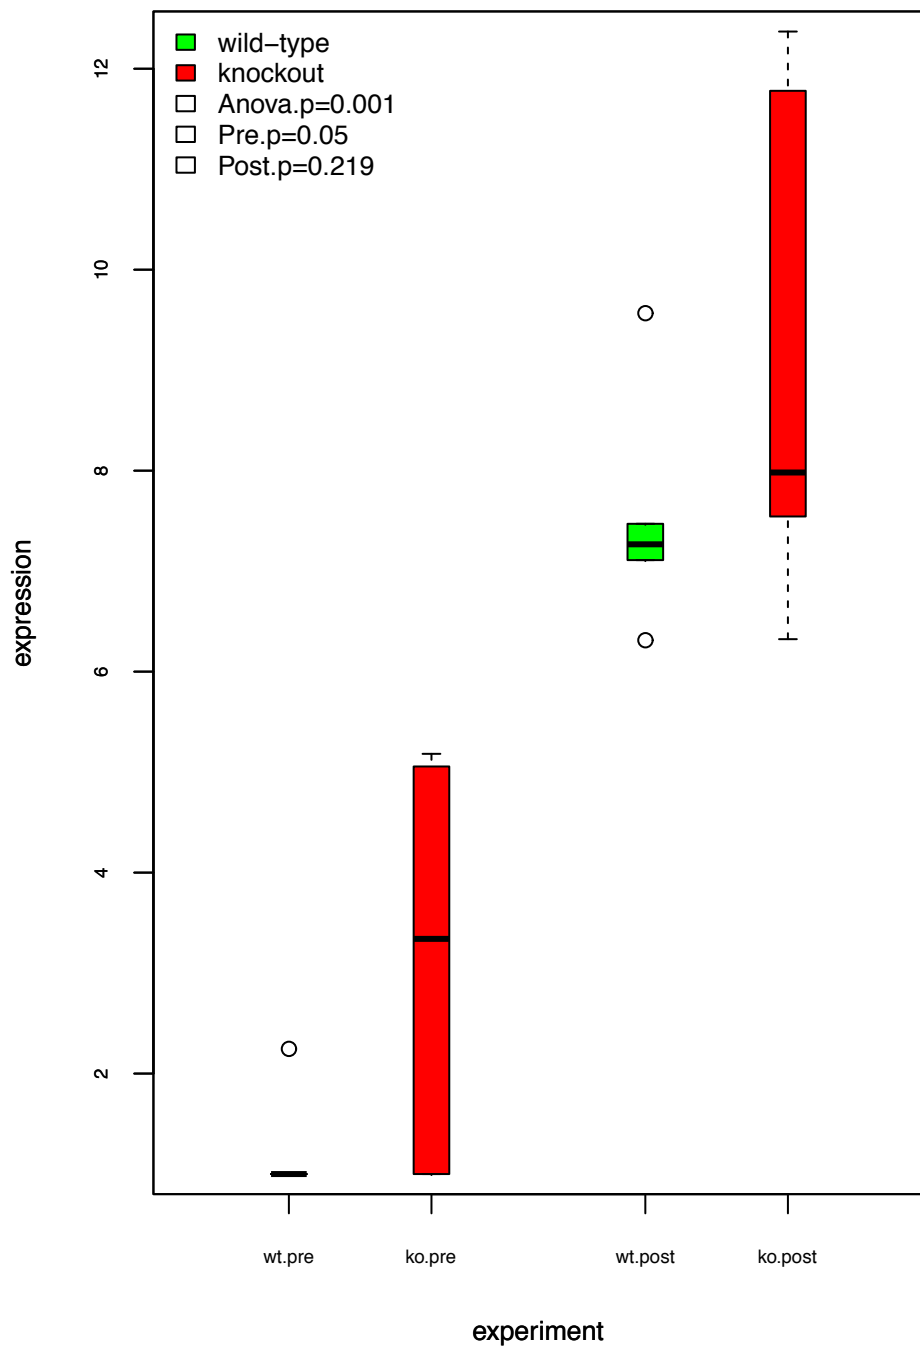

### ActivinB

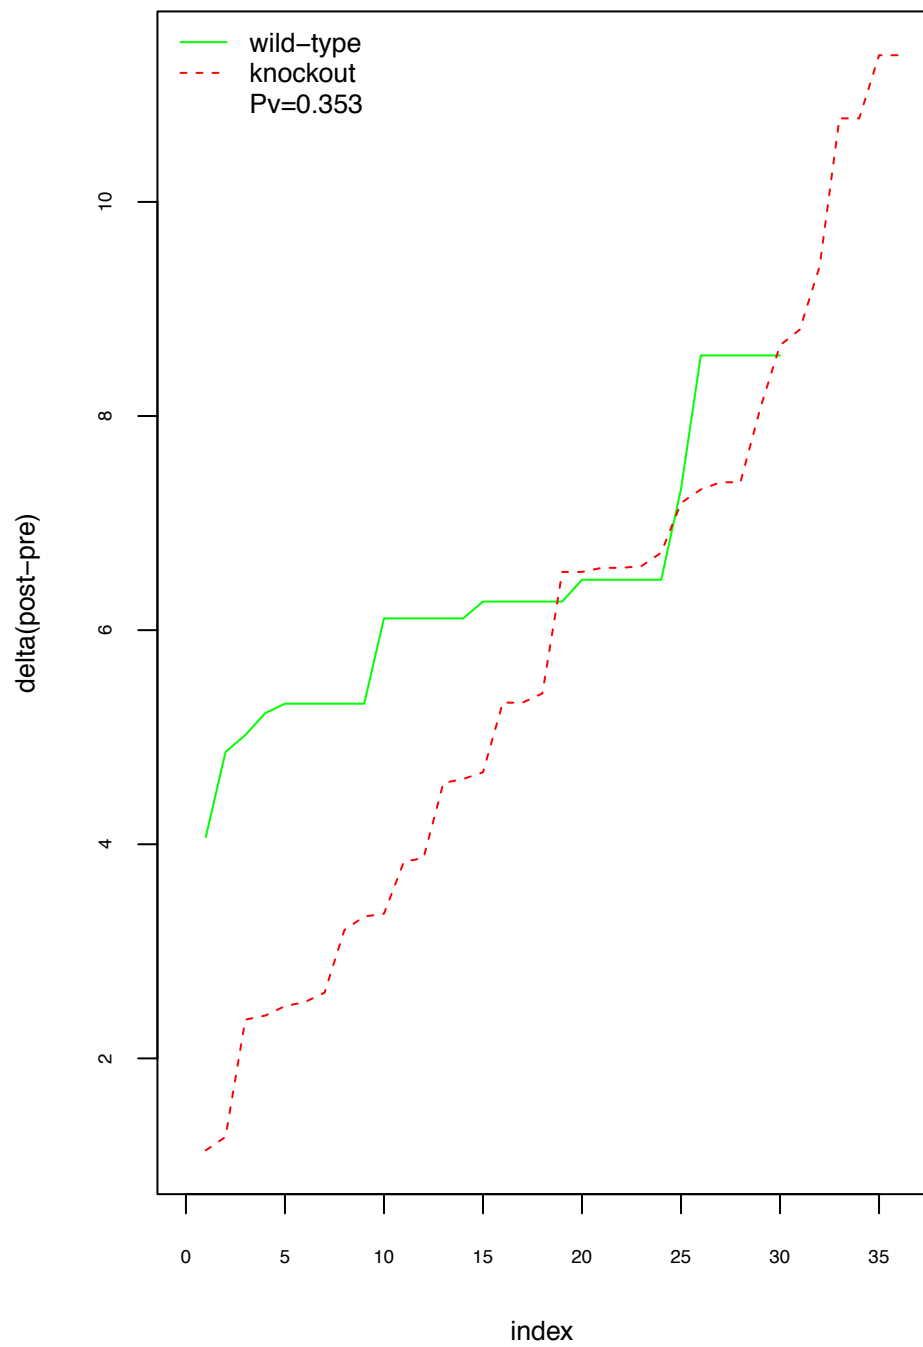

### ActivinA

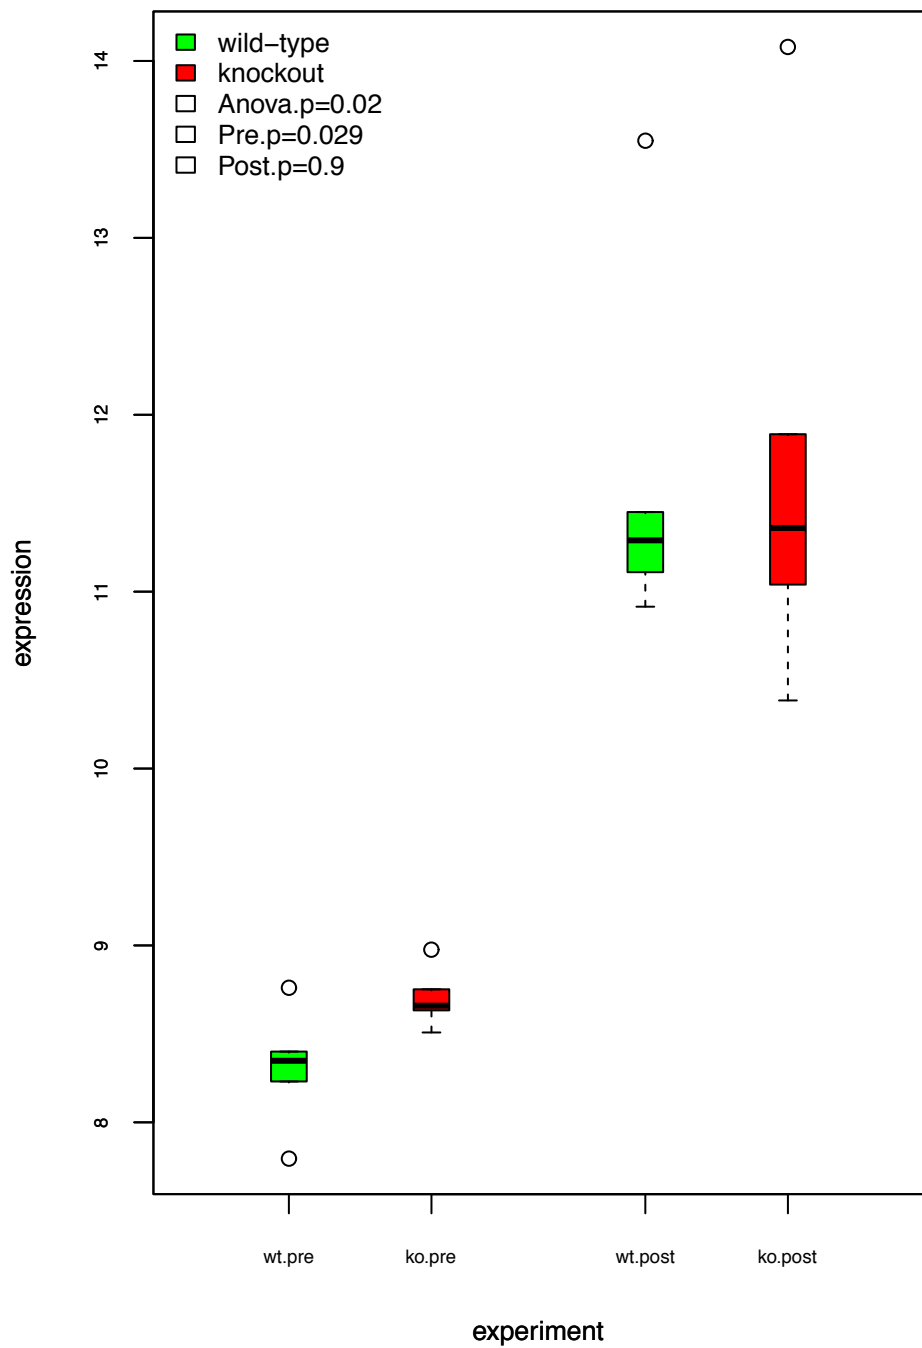

### ActivinA

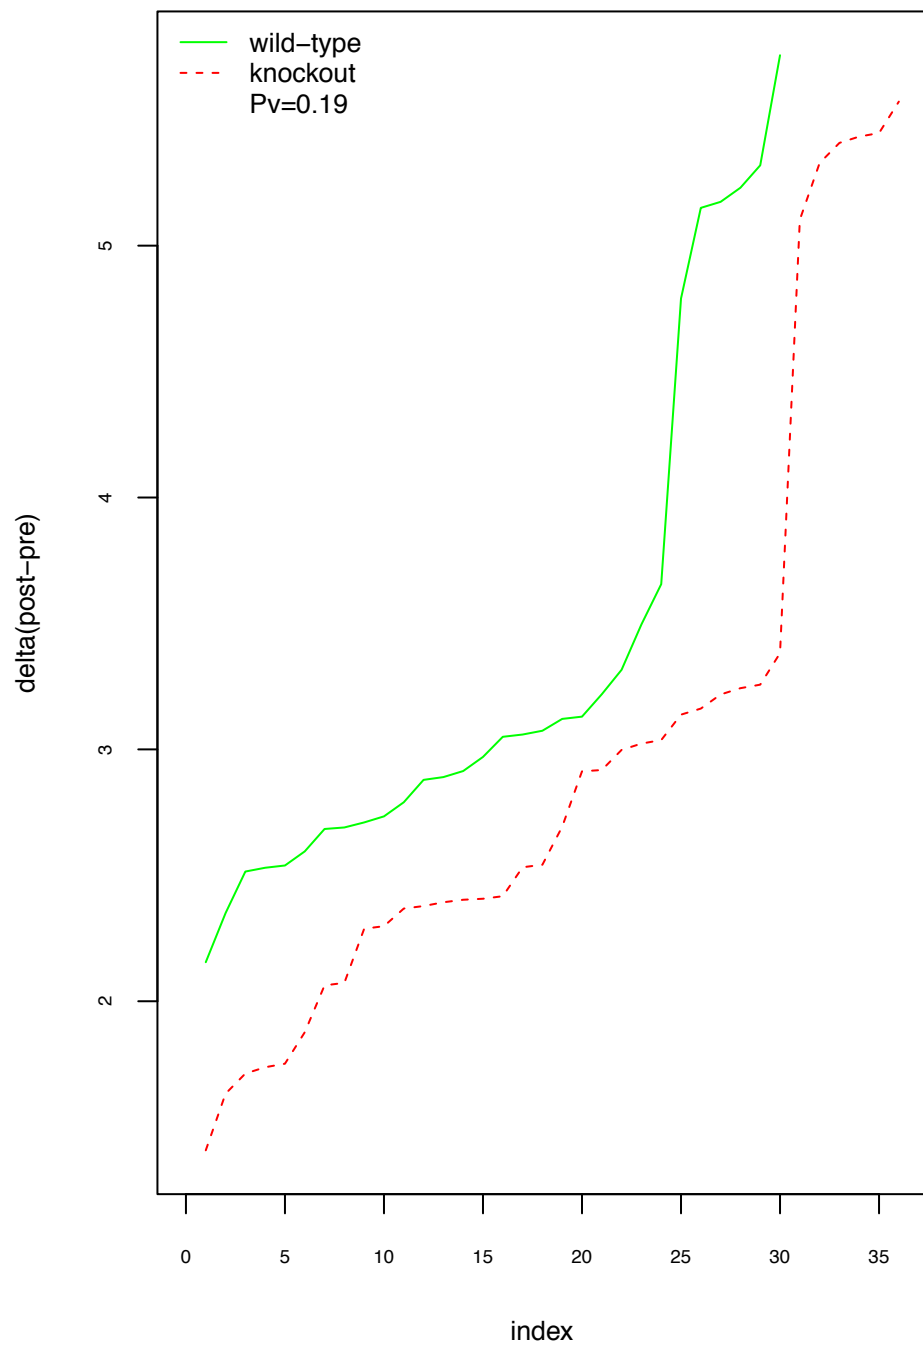

### Acp5(TRAP)

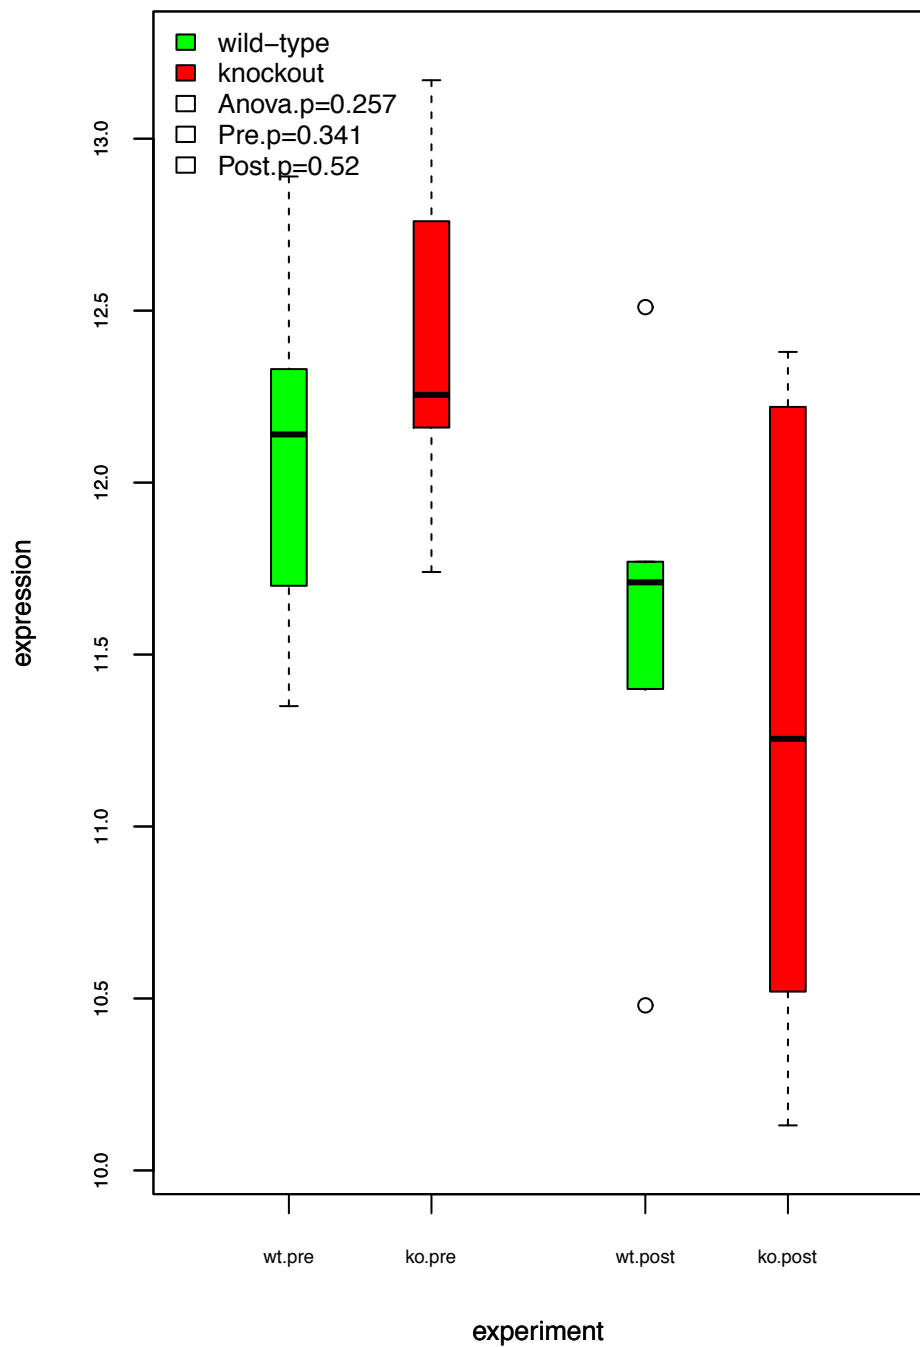

### Acp5(TRAP)

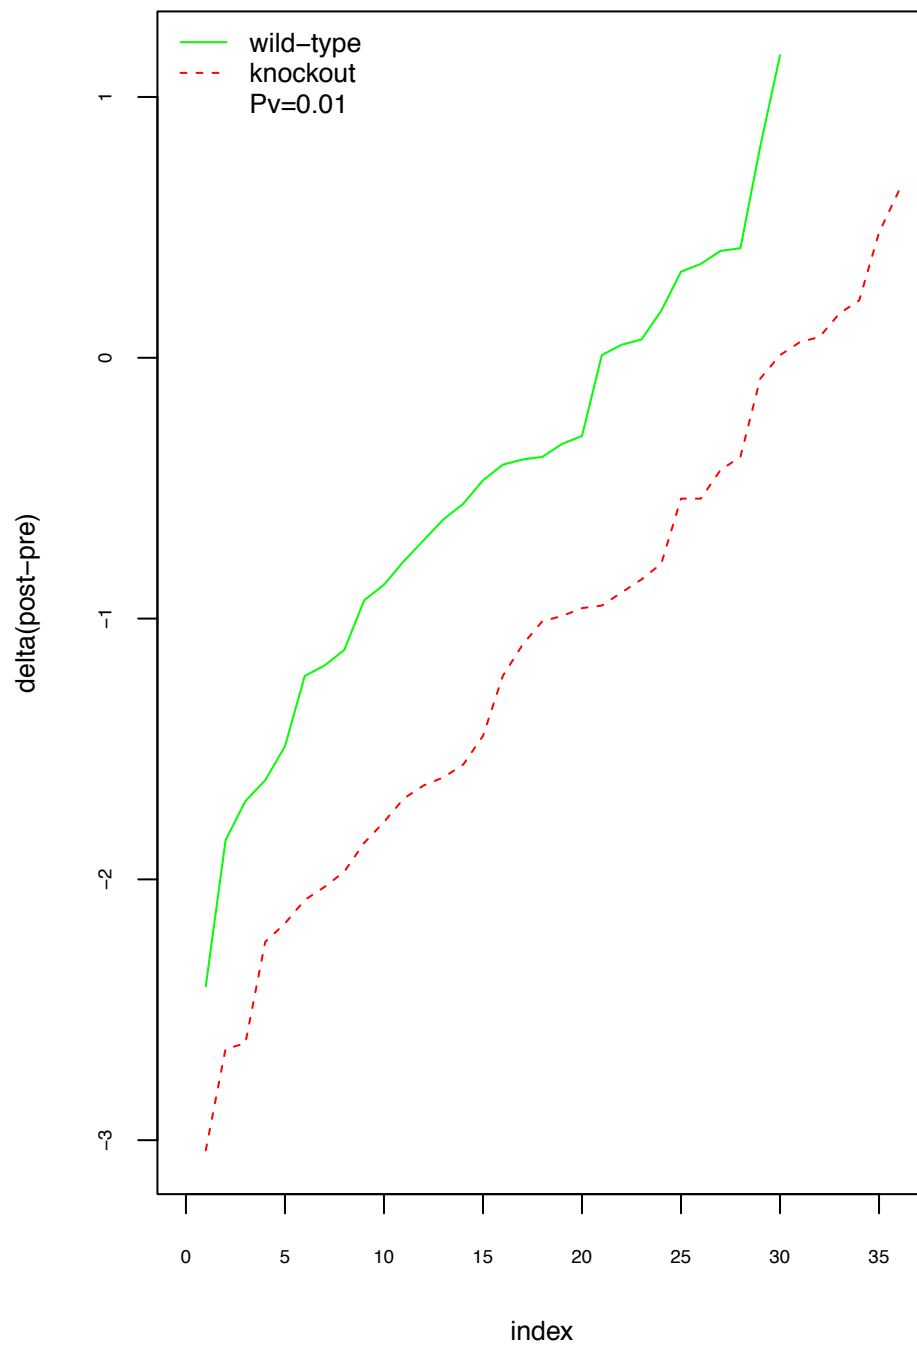

## Axin2

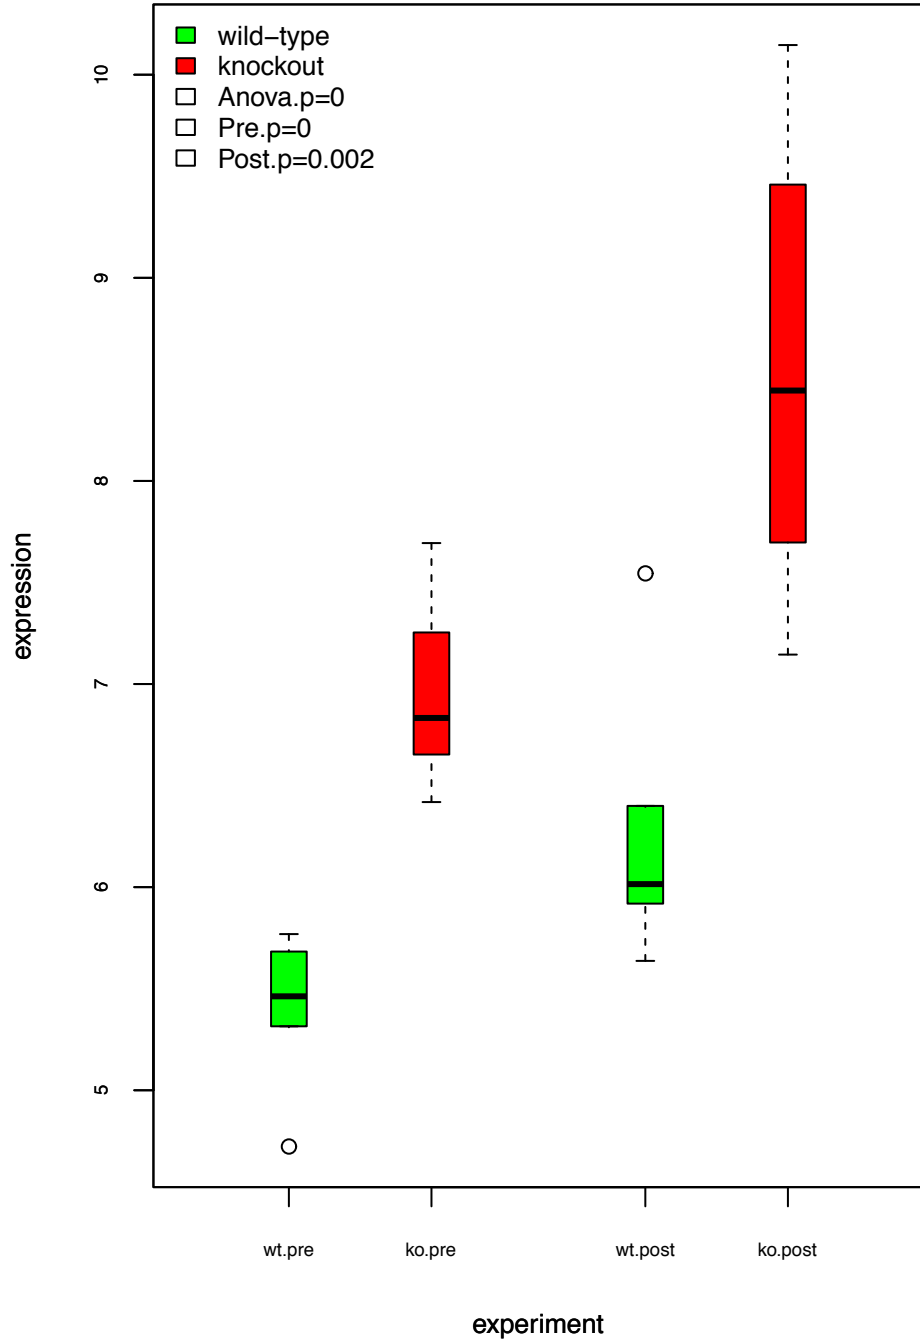

## Axin2

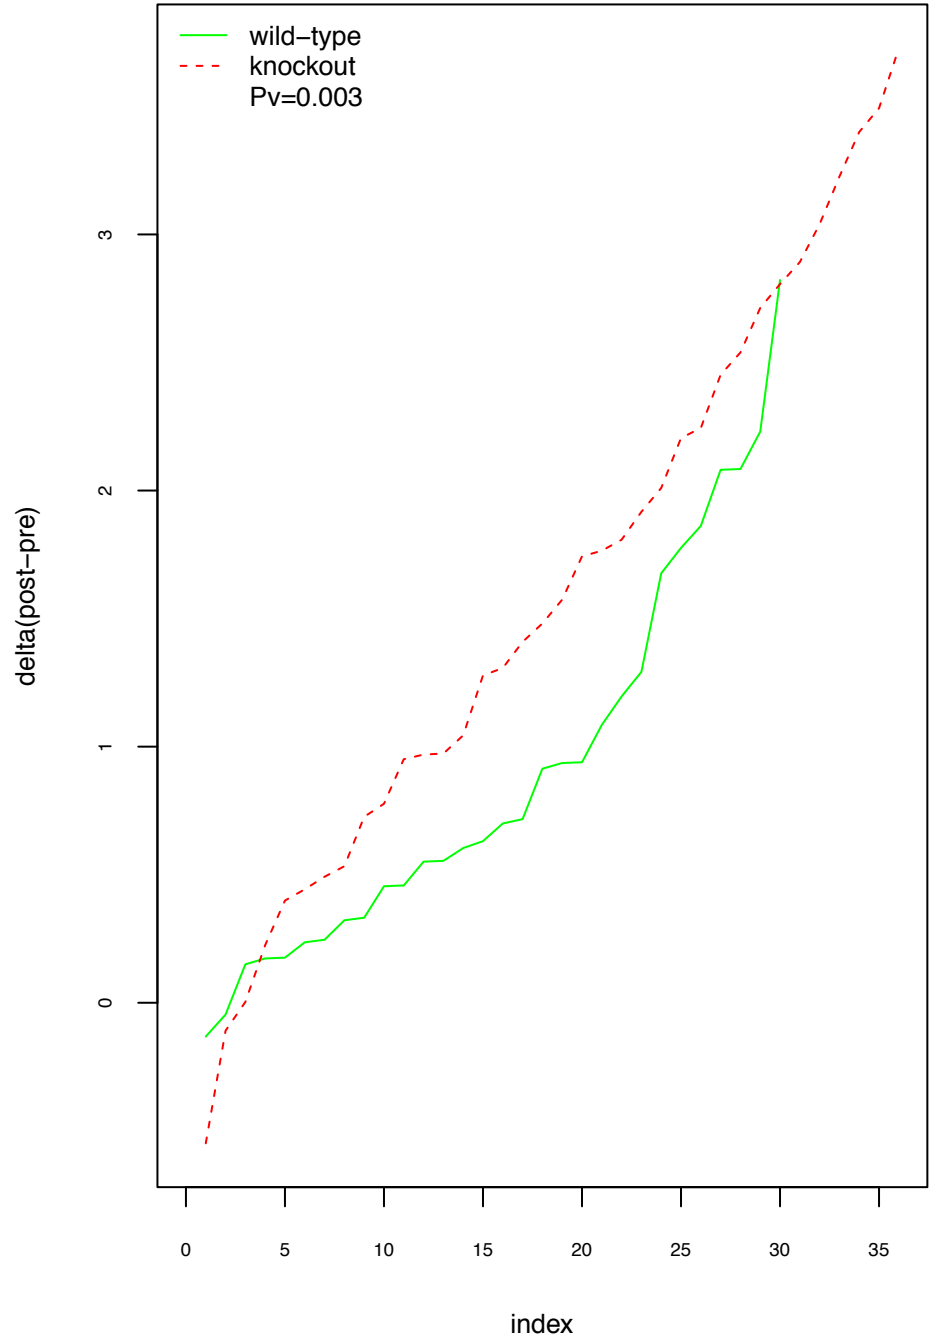



### AlkPhos(Akp2)

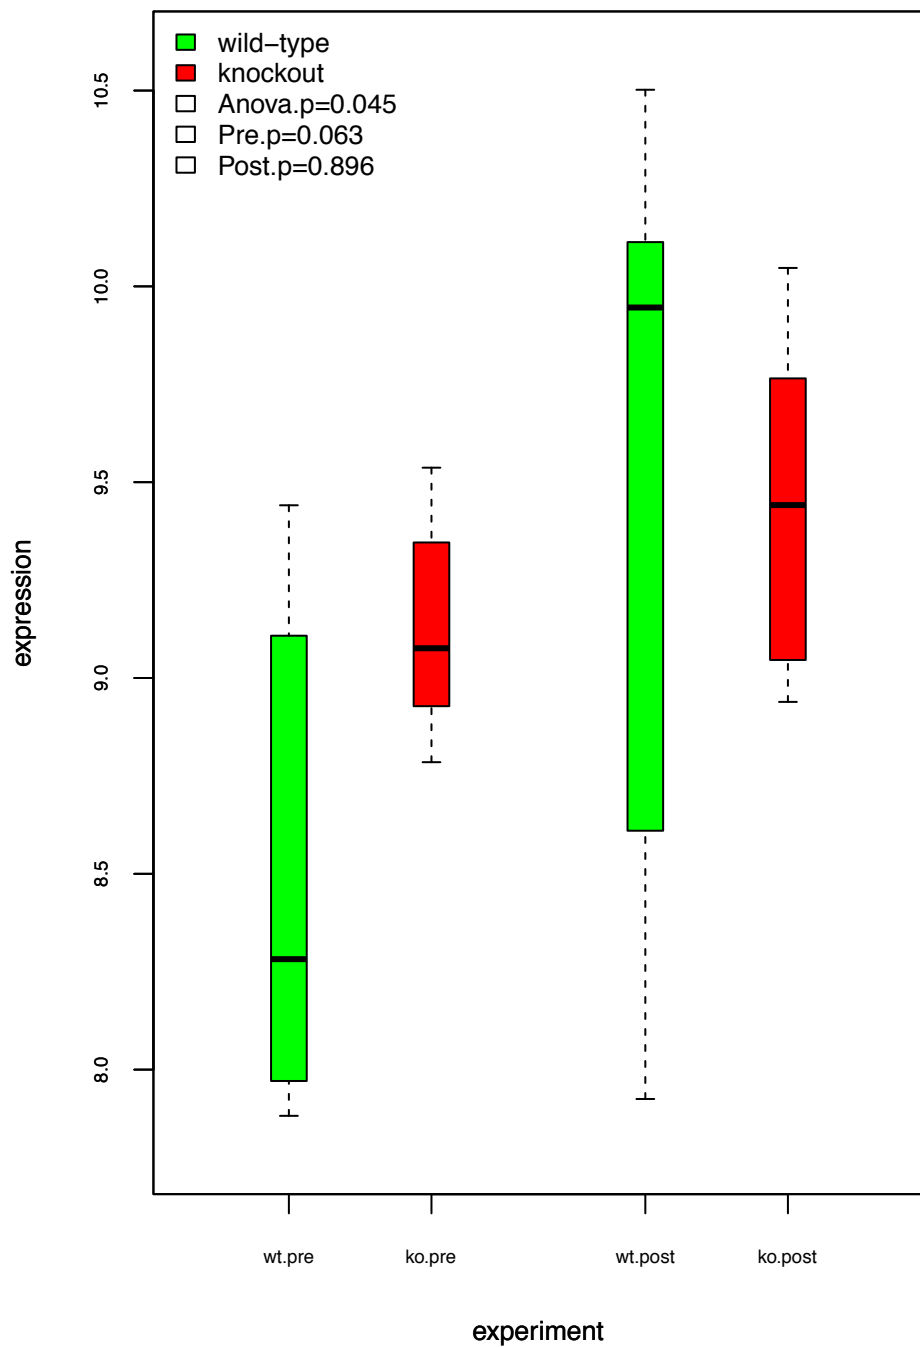

### AlkPhos(Akp2)

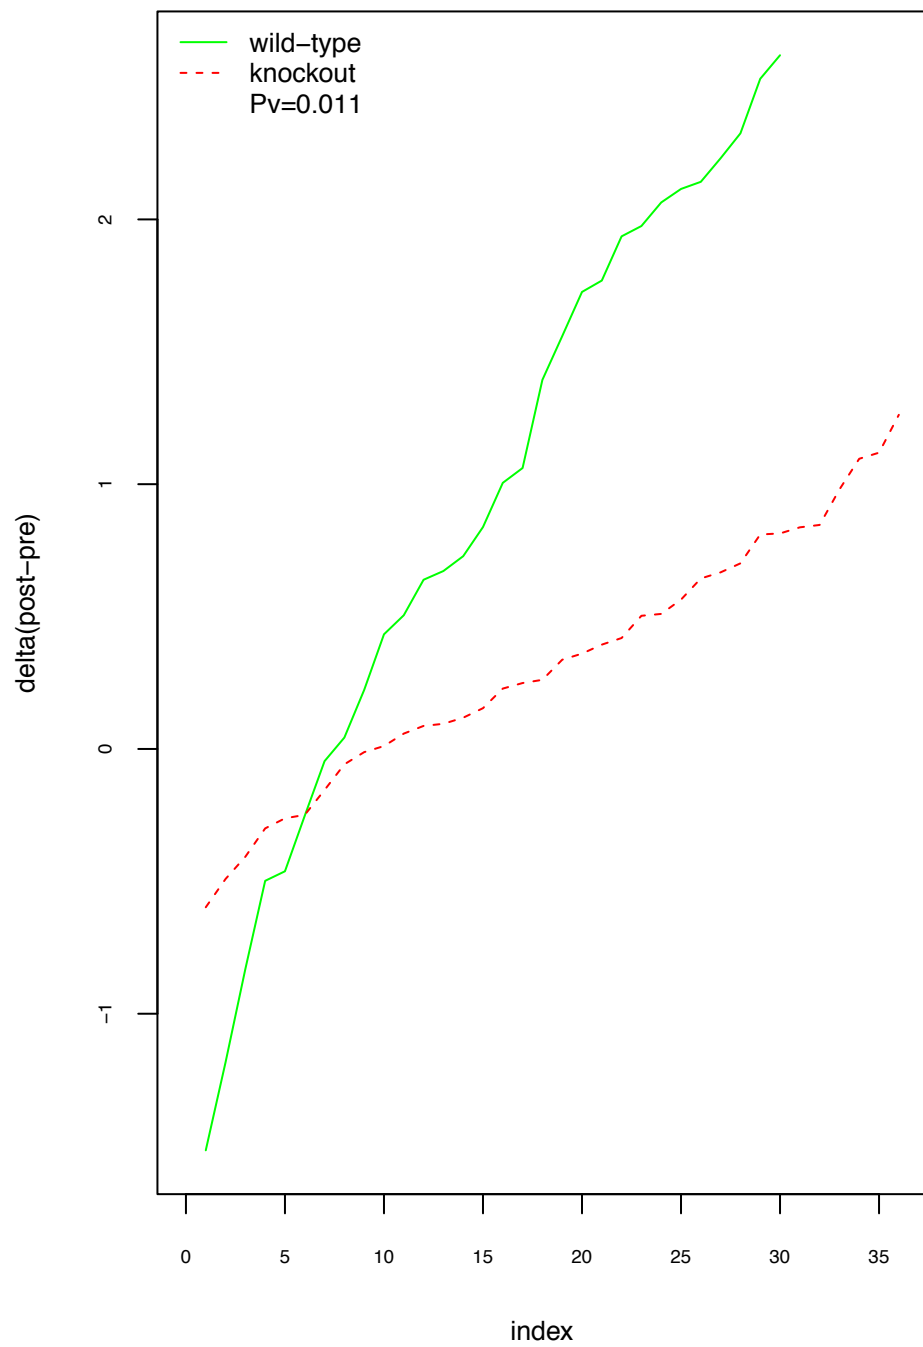

### ALK7(Acvr1c)

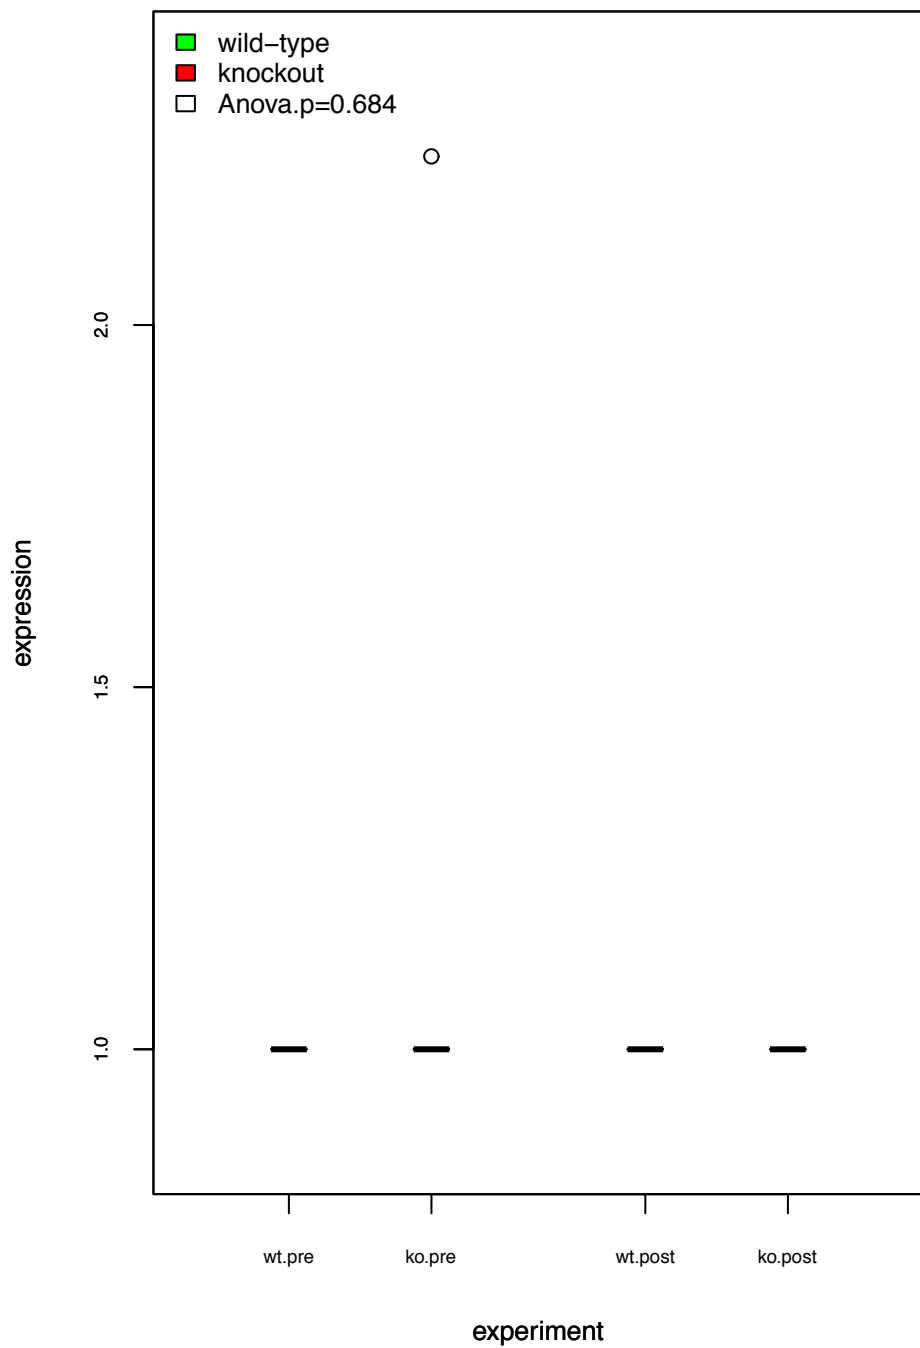

### ALK7(Acvr1c)

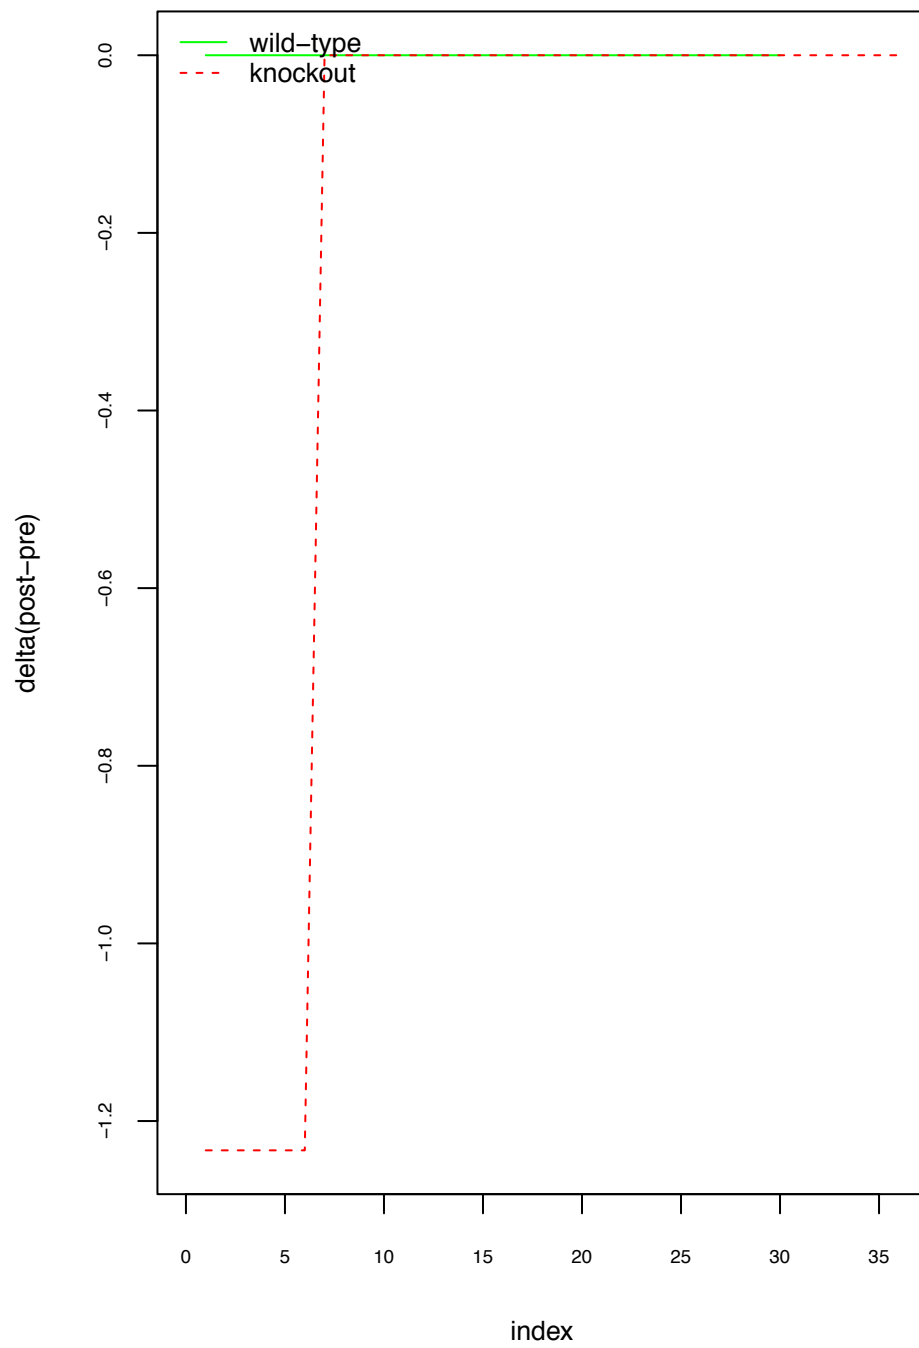

### ALK6(Bmpr1b)

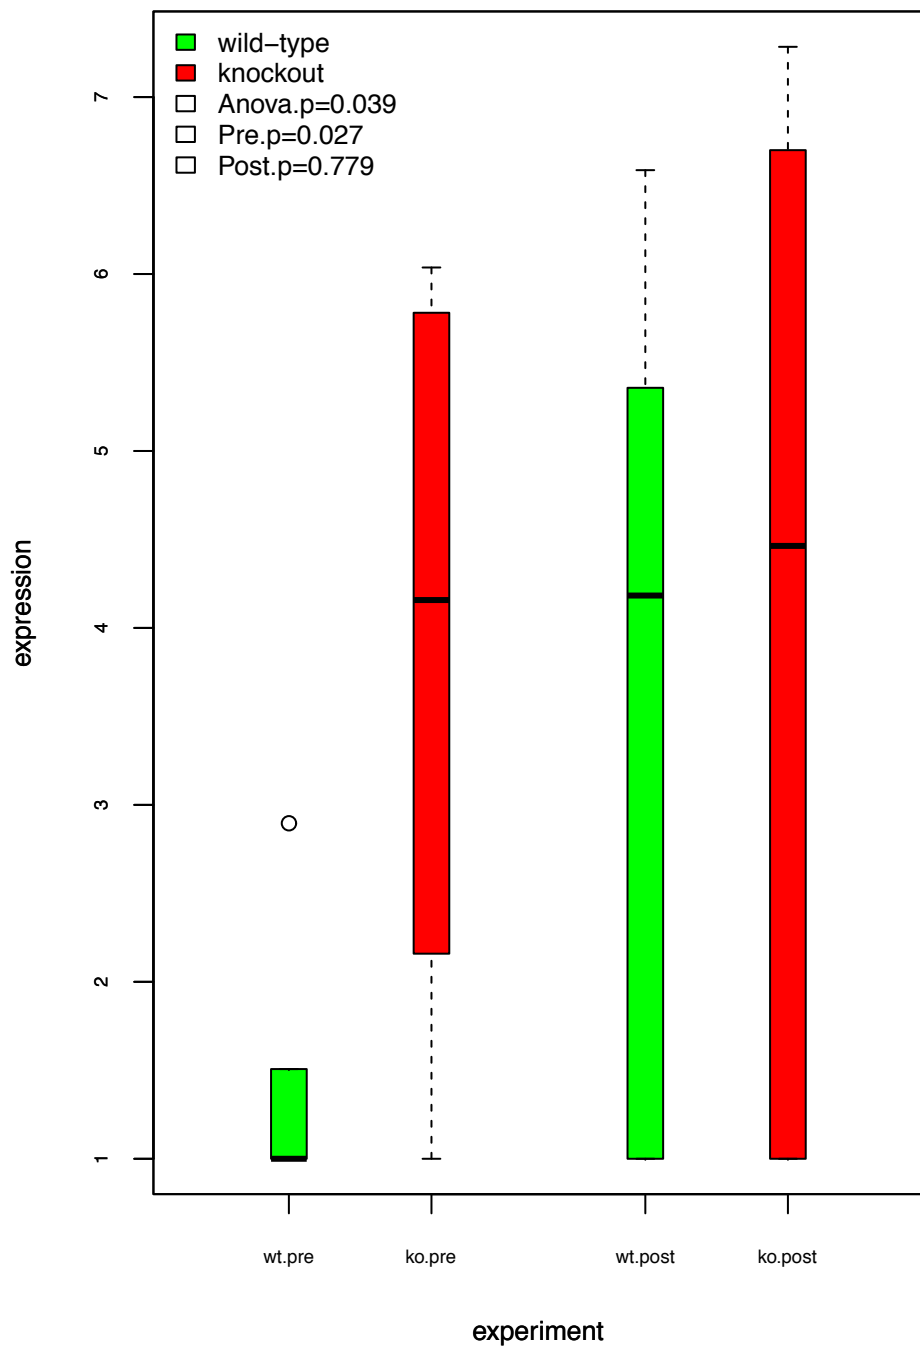

### ALK6(Bmpr1b)

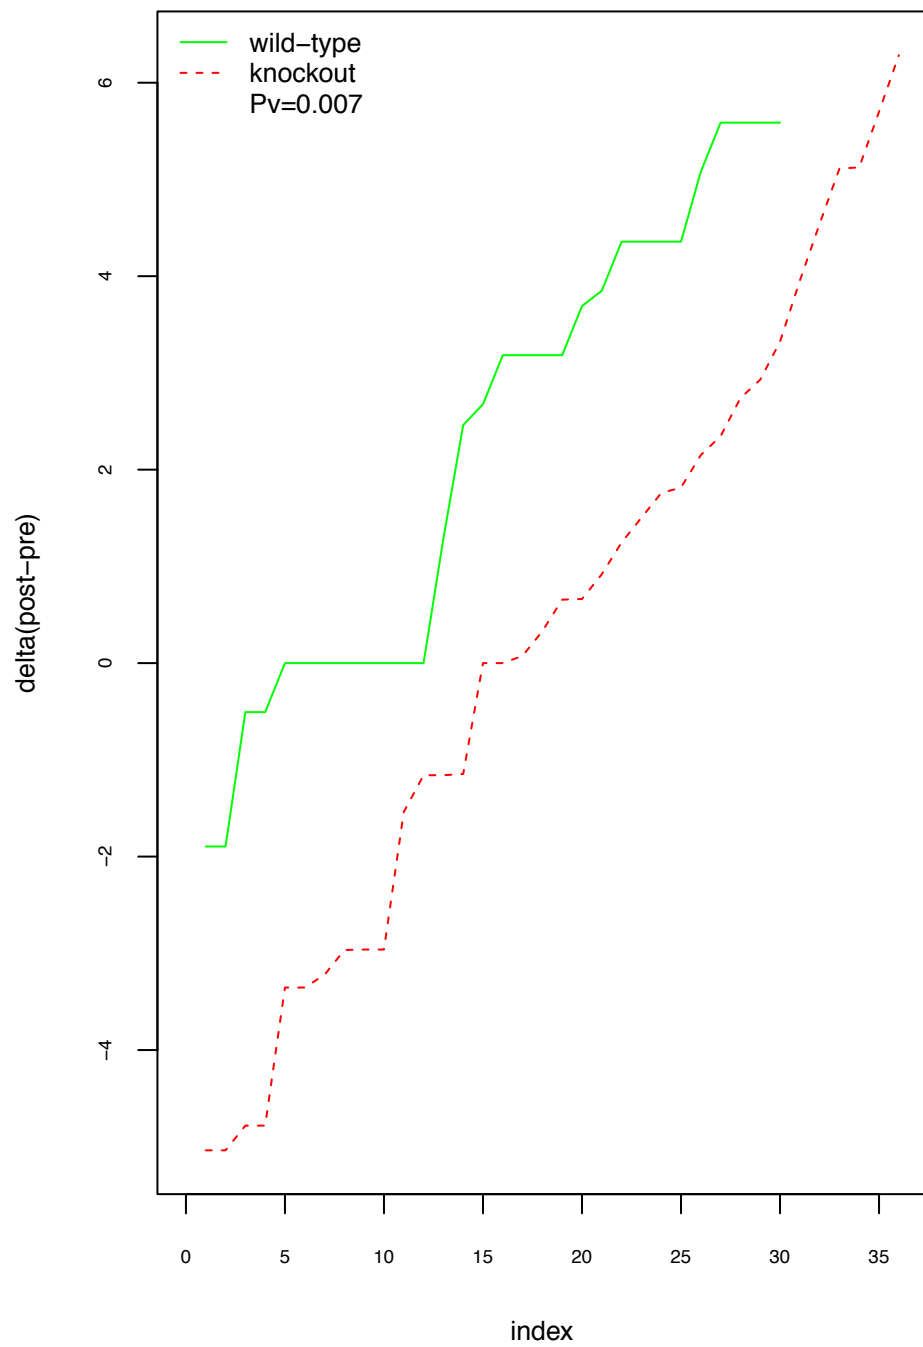

### ALK5(Tgfbr1)

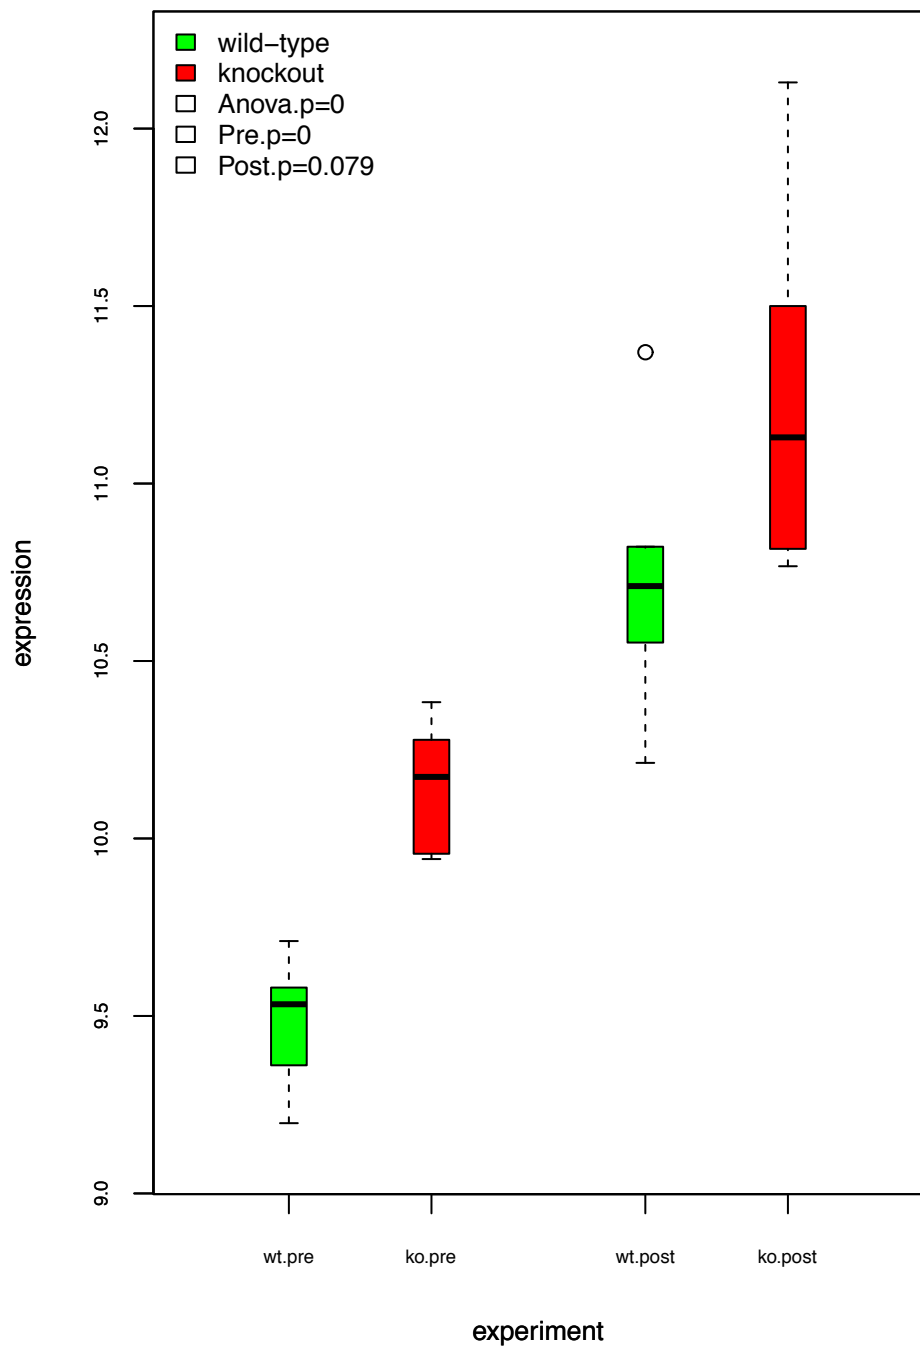

### ALK5(Tgfbr1)

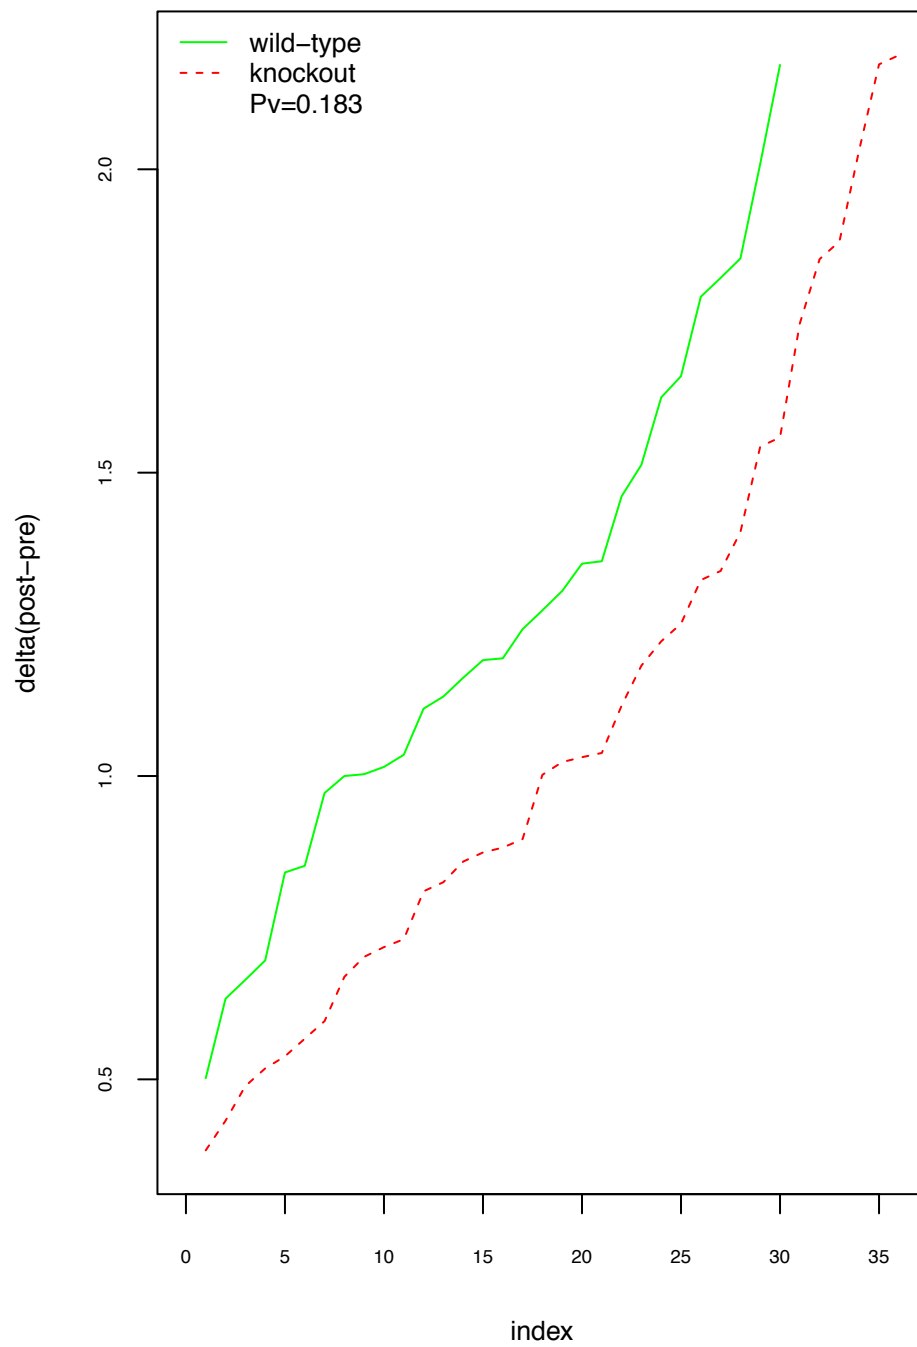

### ALK4(Acvr1b)

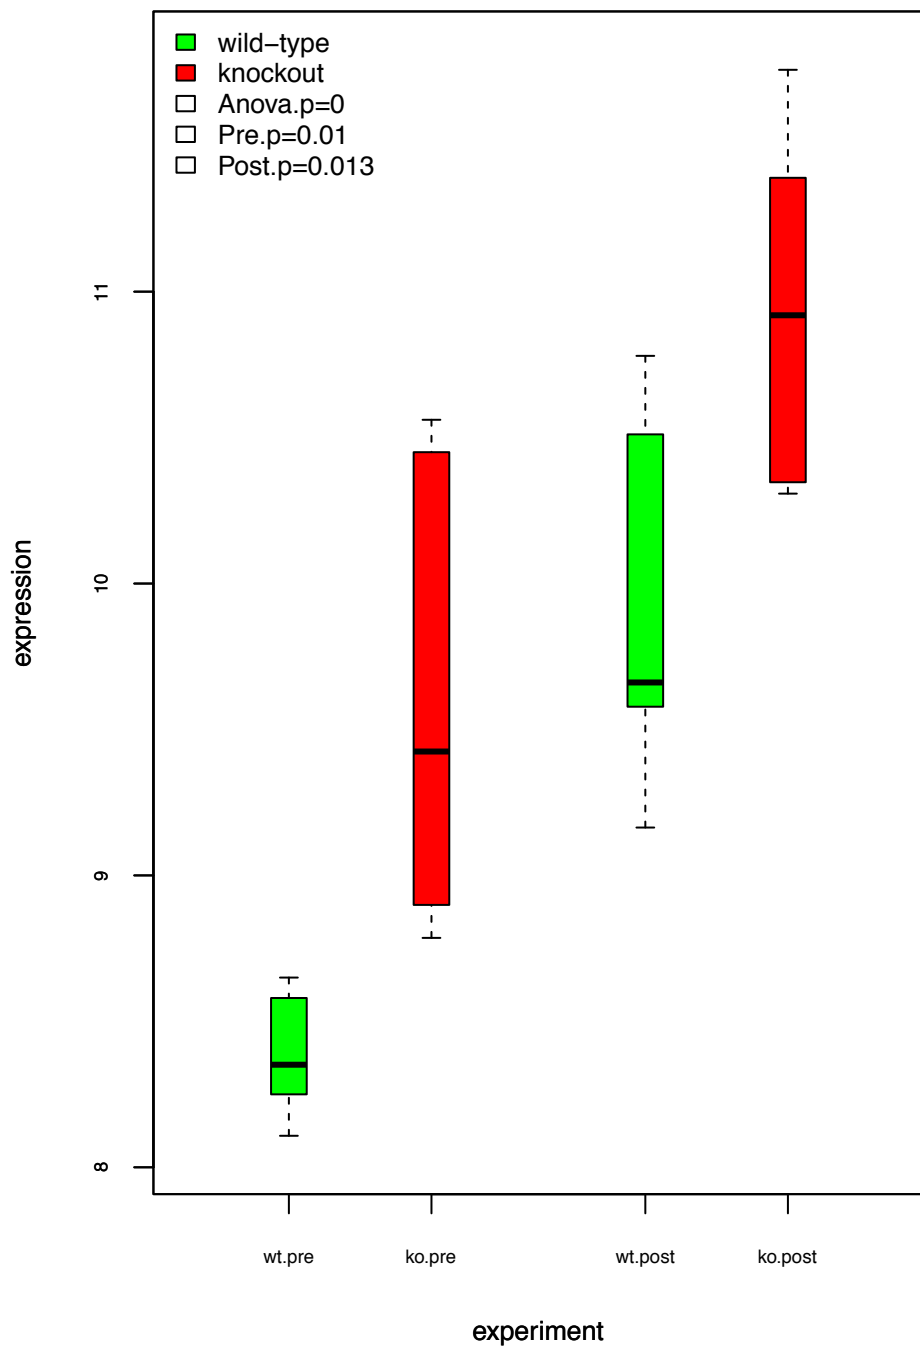

### ALK4(Acvr1b)

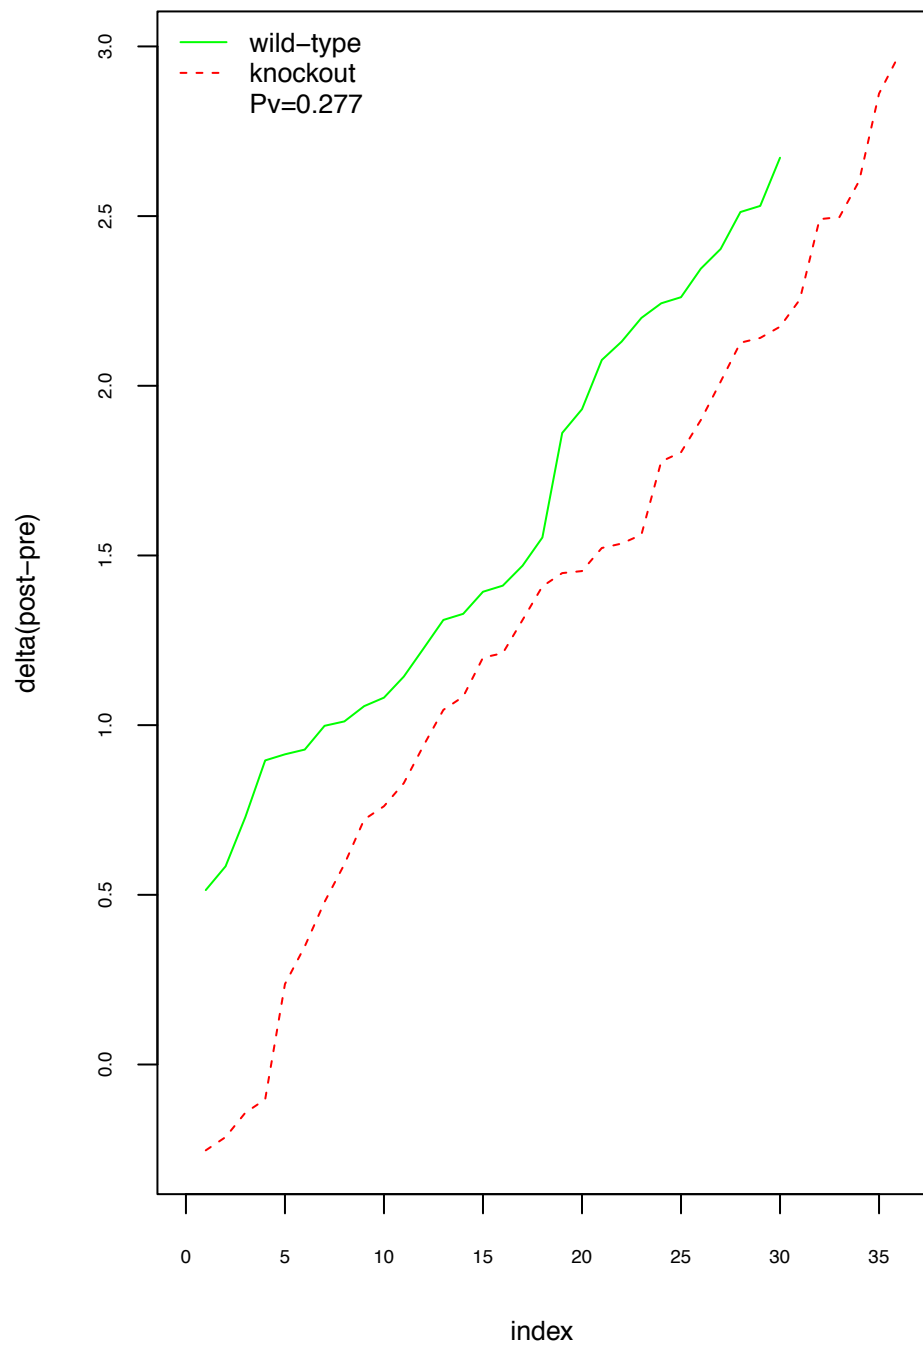

### ALK3(Bmpr1a)

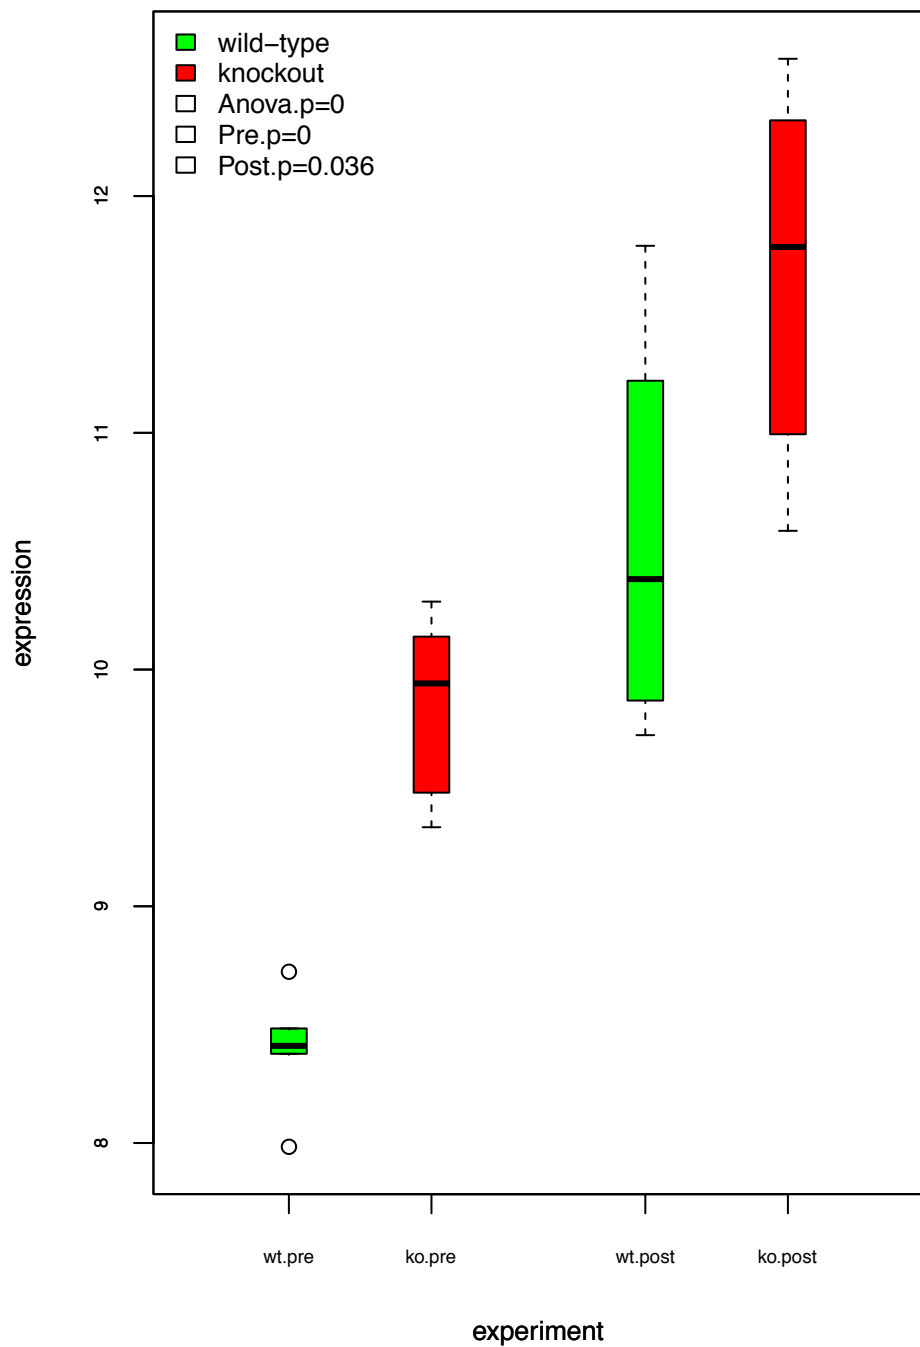

### ALK3(Bmpr1a)

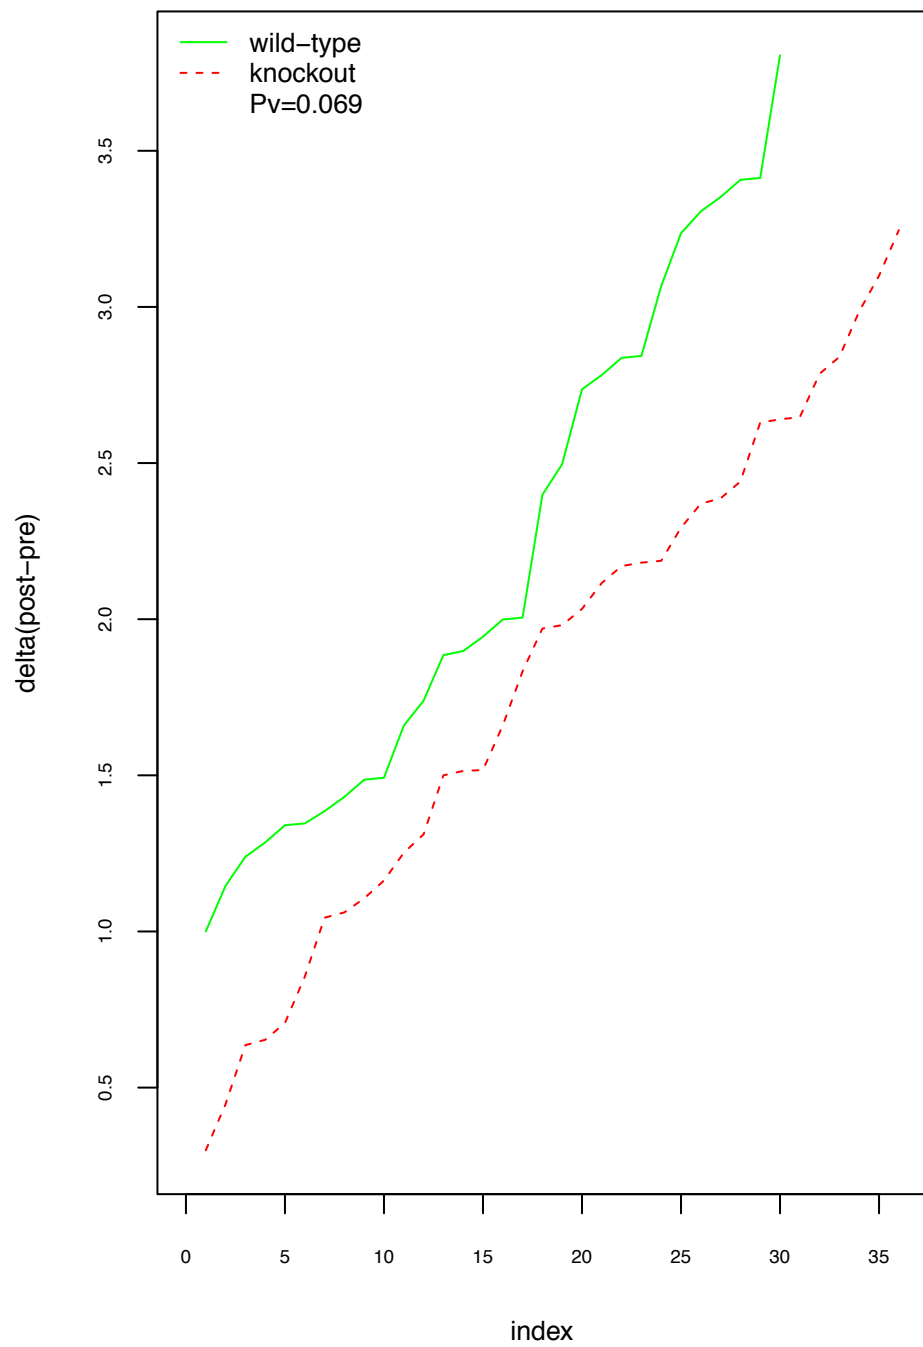

### ALK2(Acvr1)

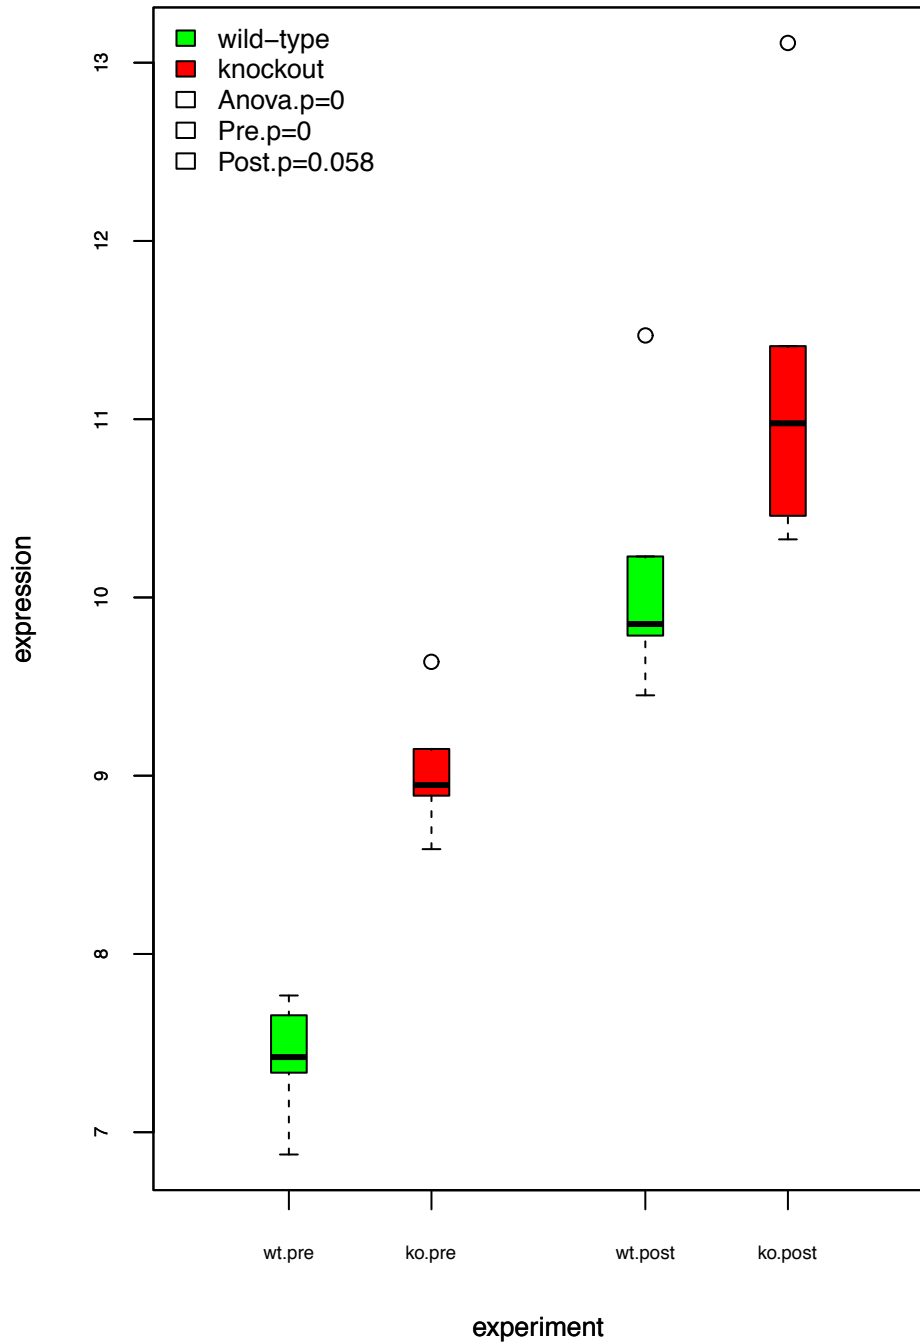

### ALK2(Acvr1)

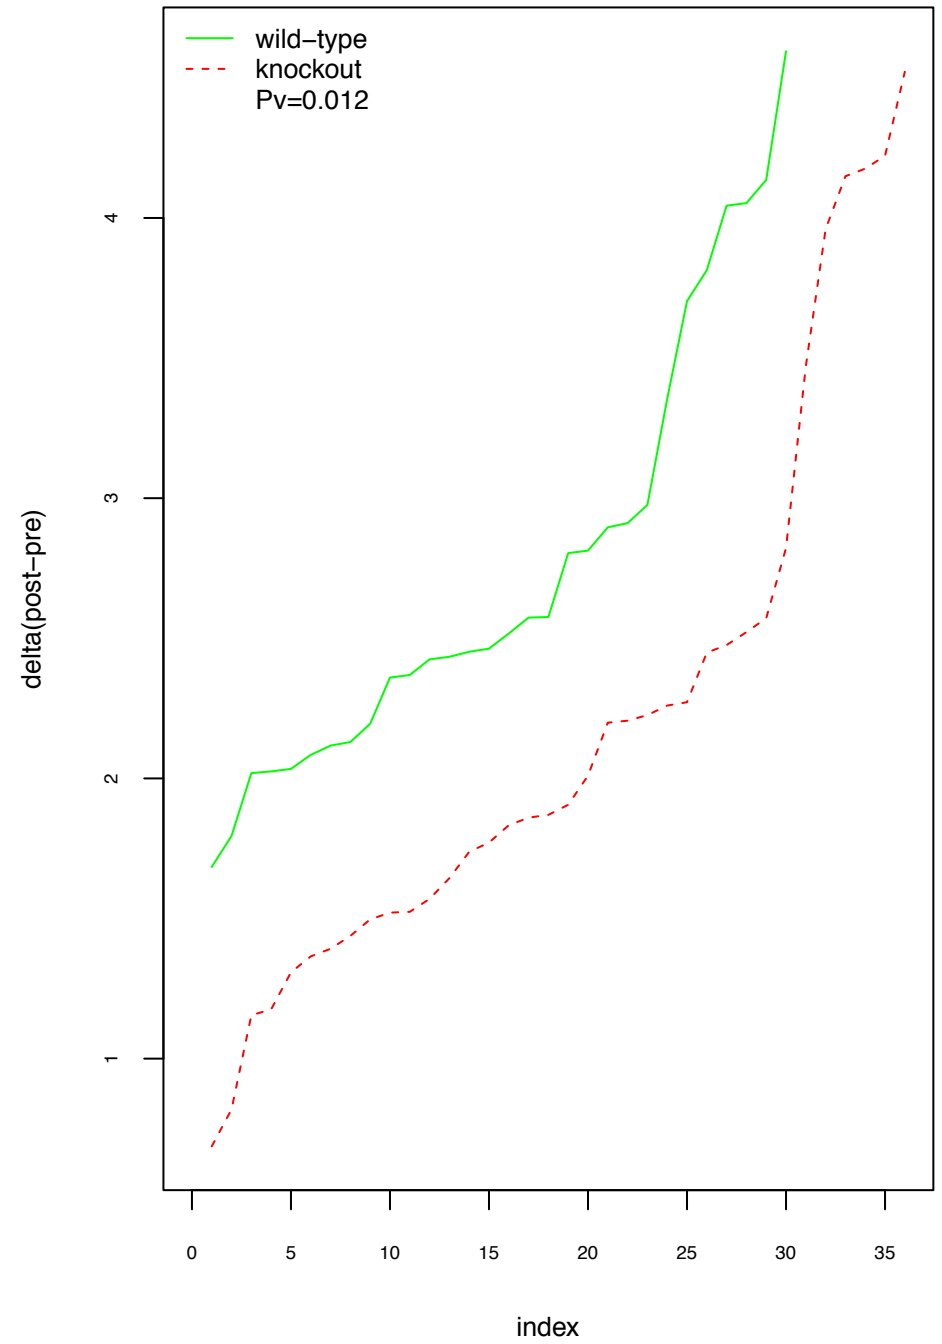

# ALK1(Acvrl1)

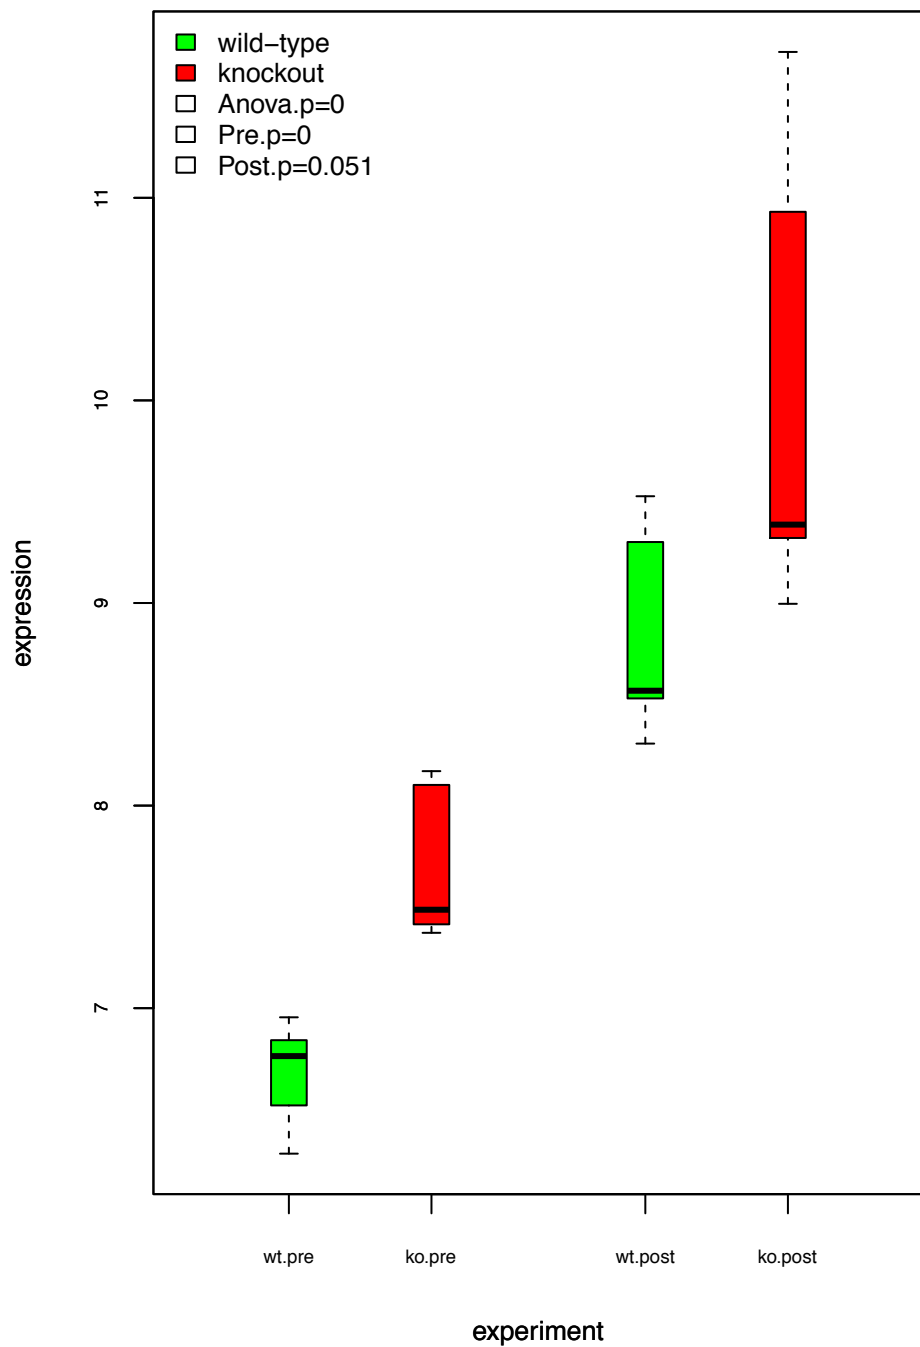

# ALK1(Acvrl1)

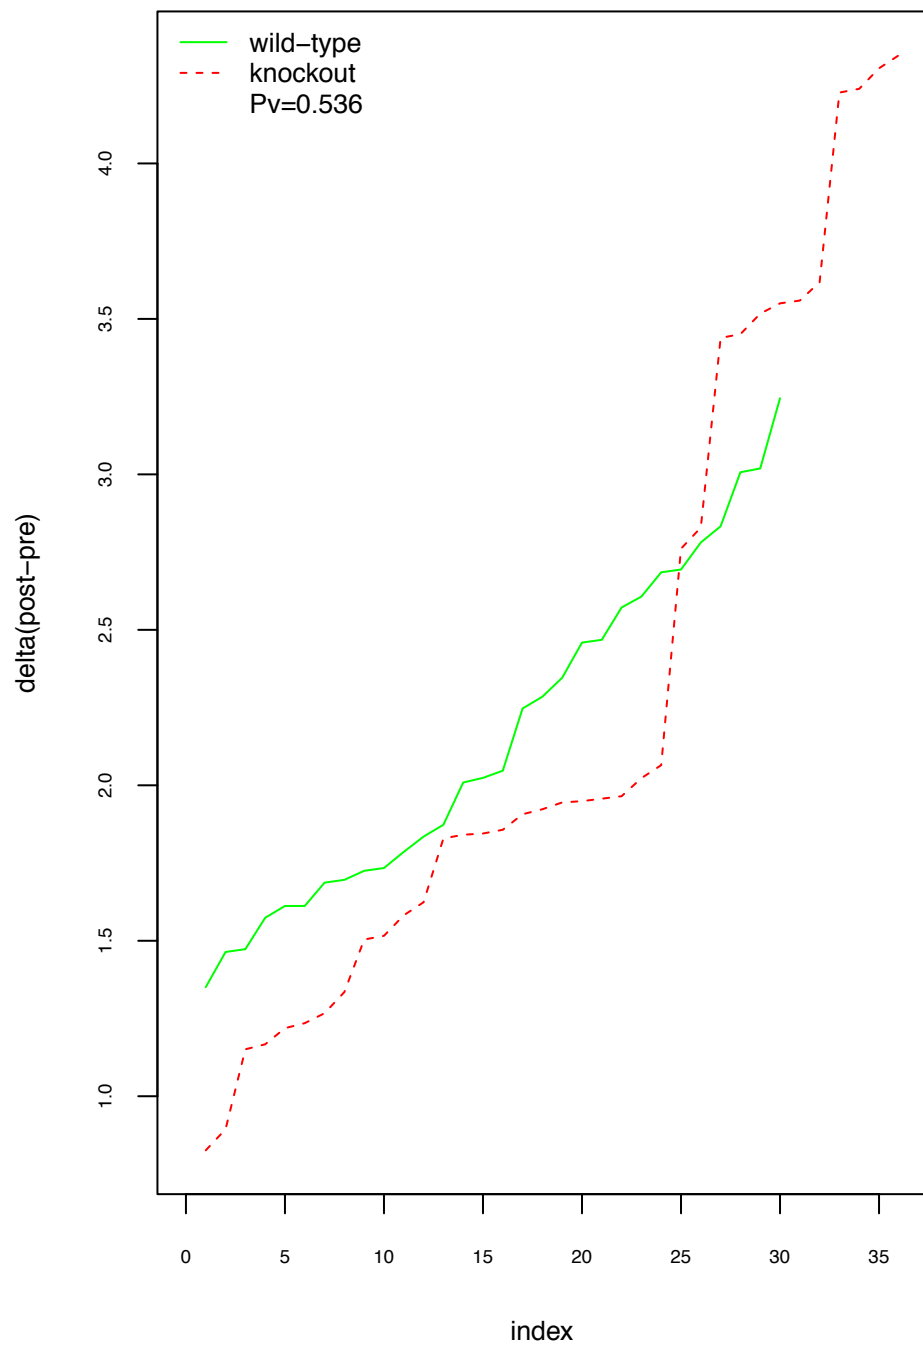



## Adipor2

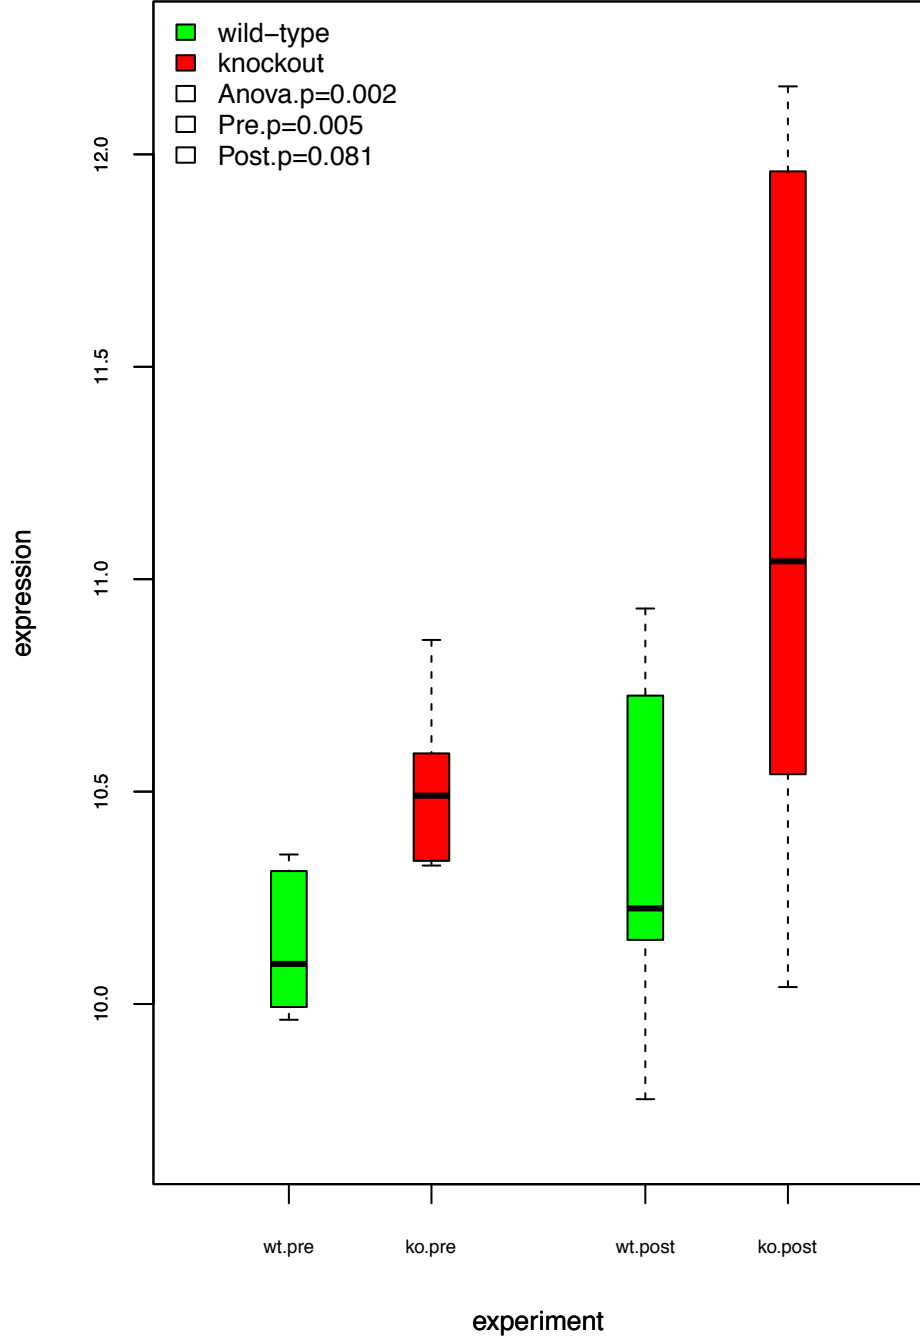

## Adipor2

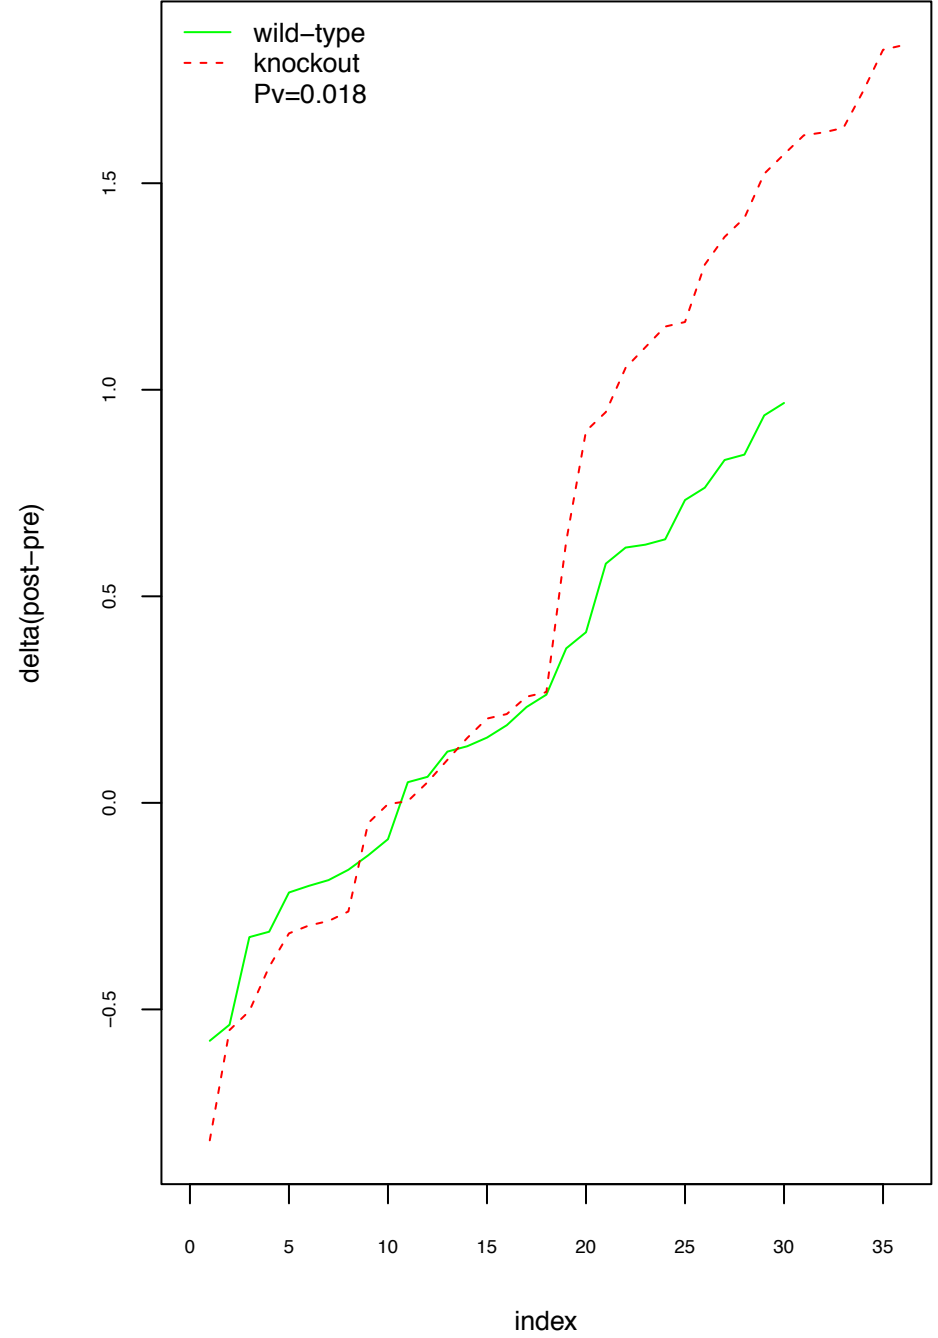

# Adipor1

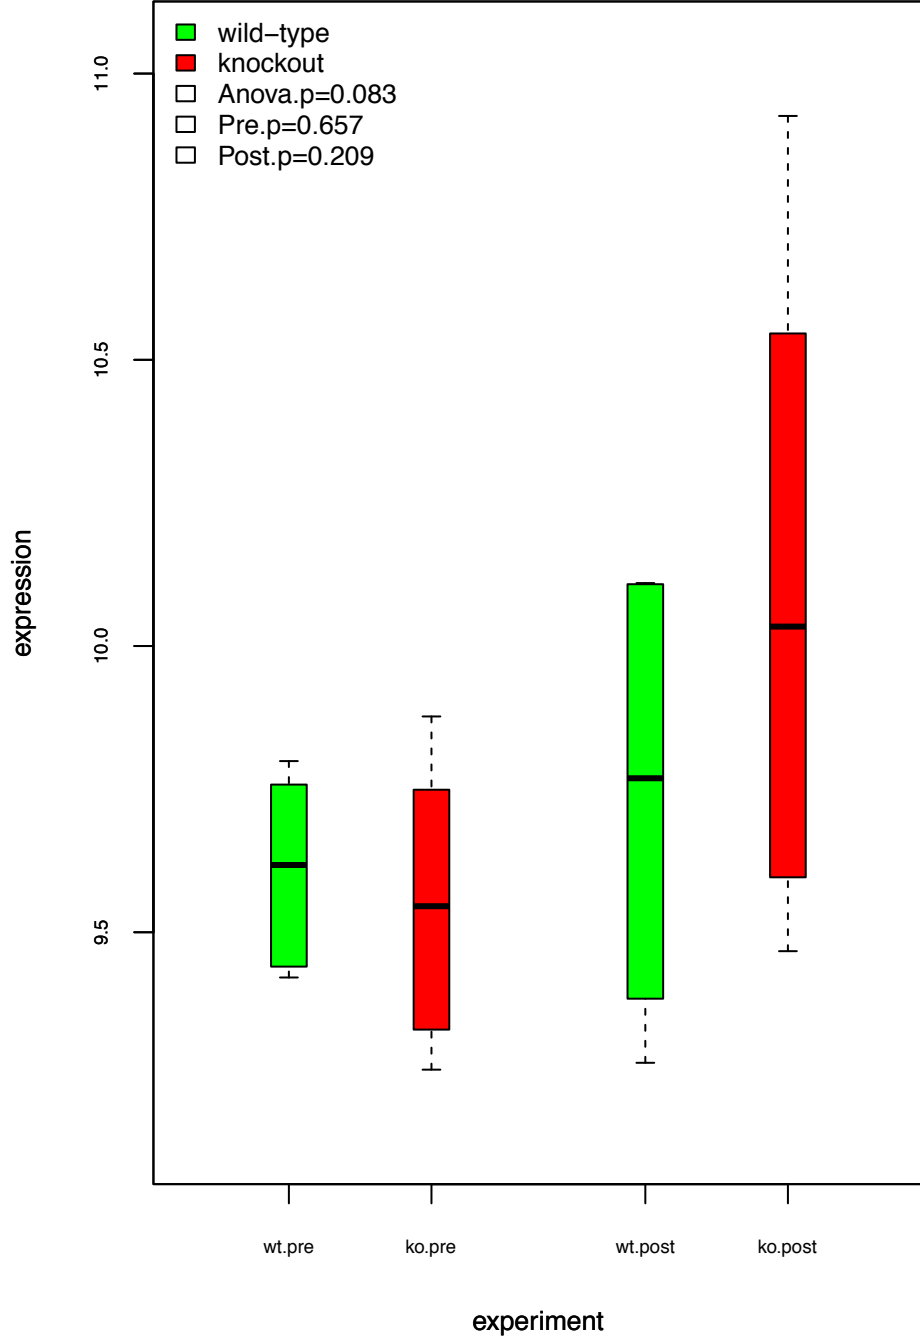

# Adipor1

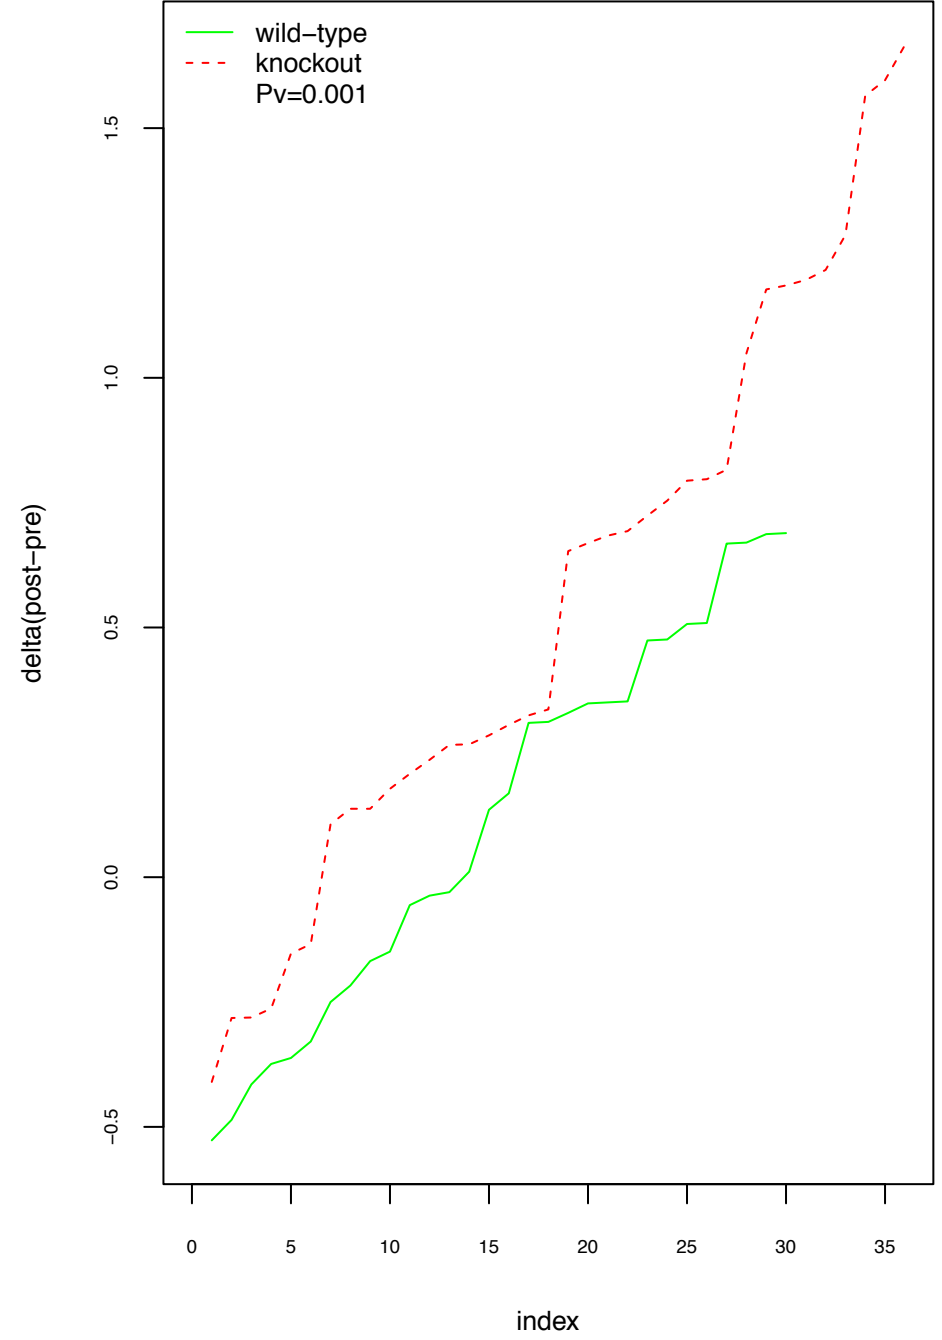

# Adipoq

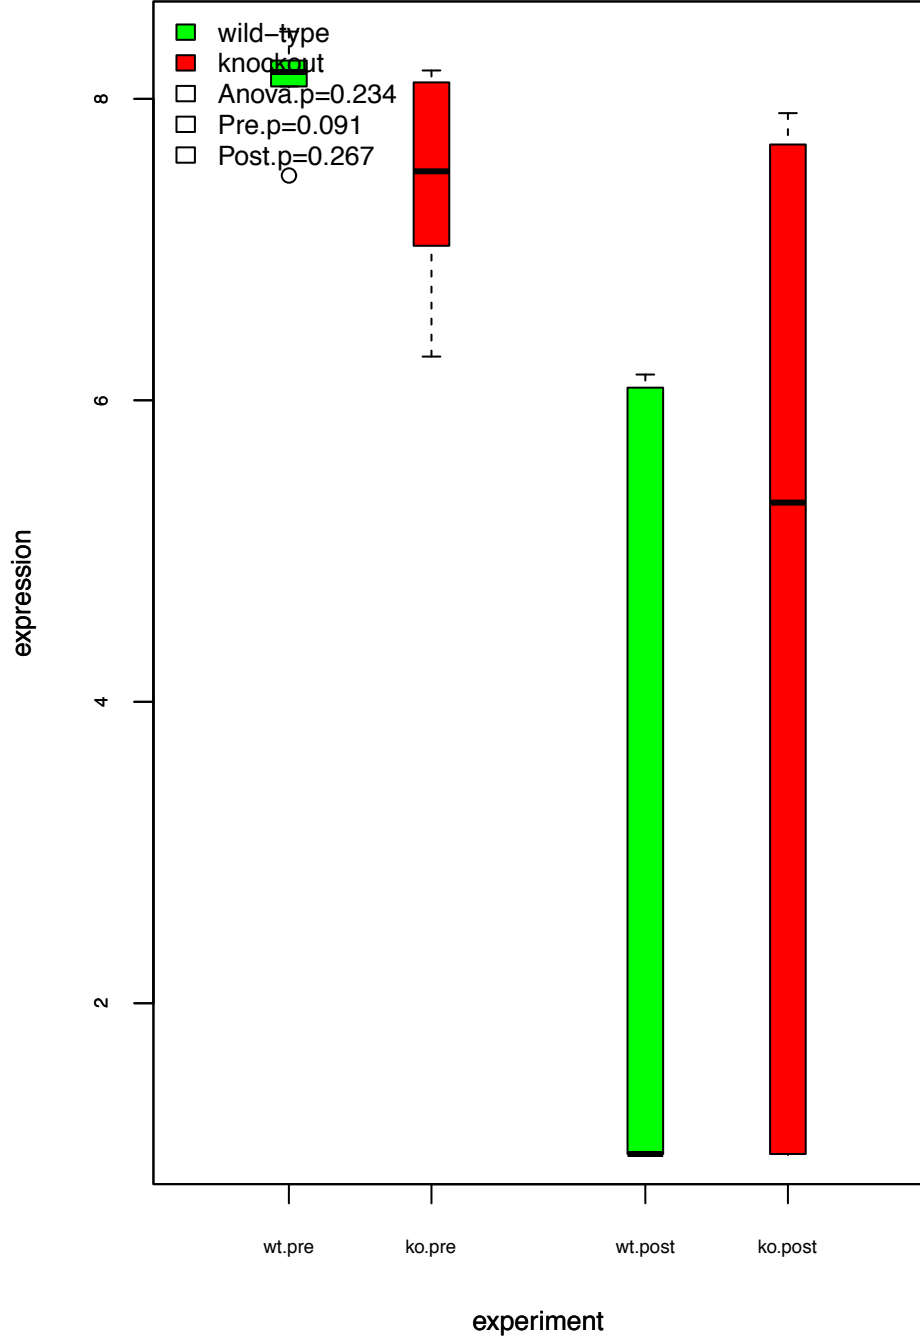

# Adipoq

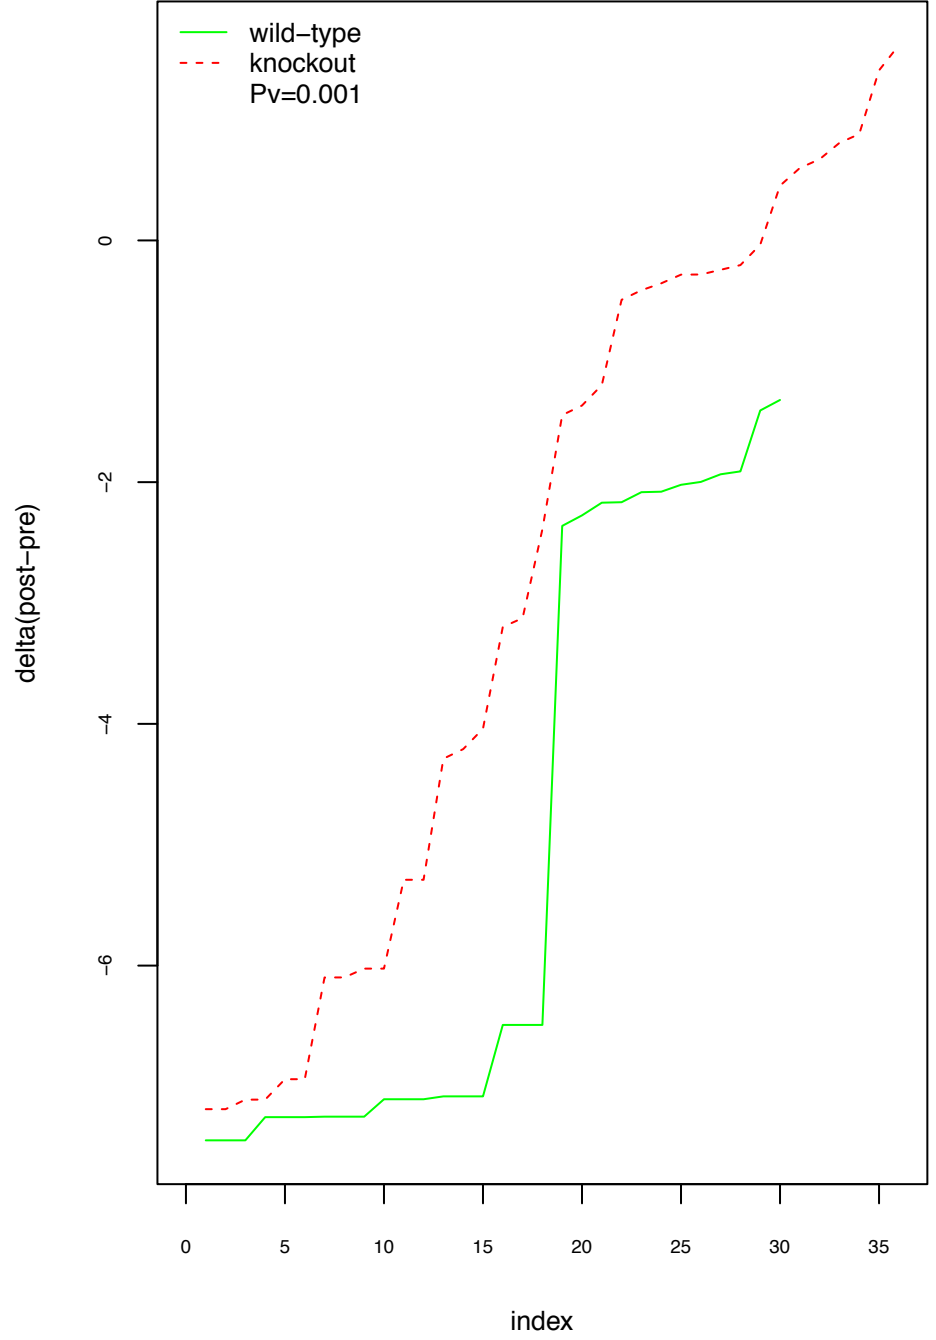

### BSP(lbsp)

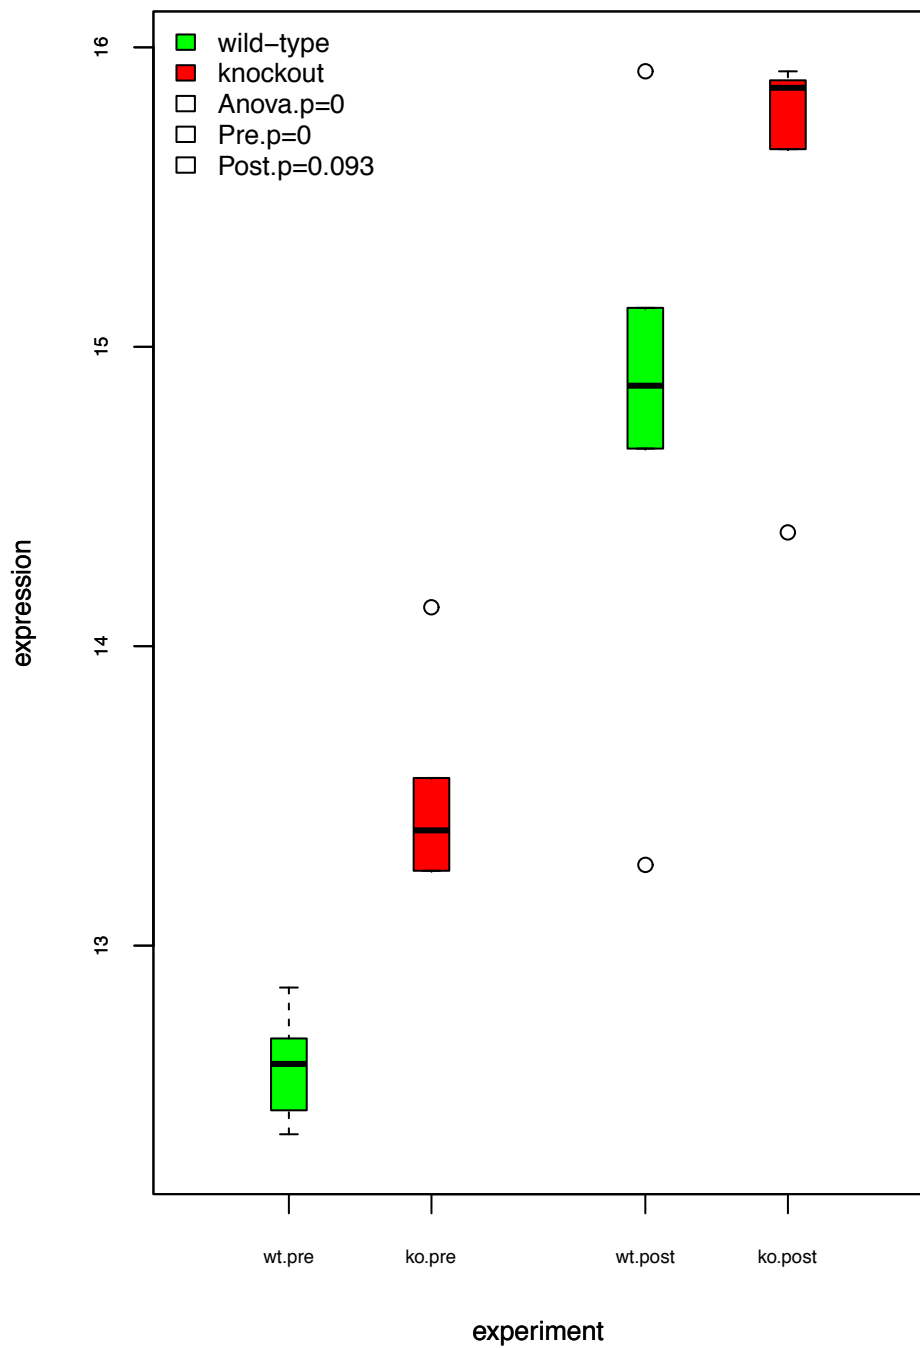

### BSP(lbsp)

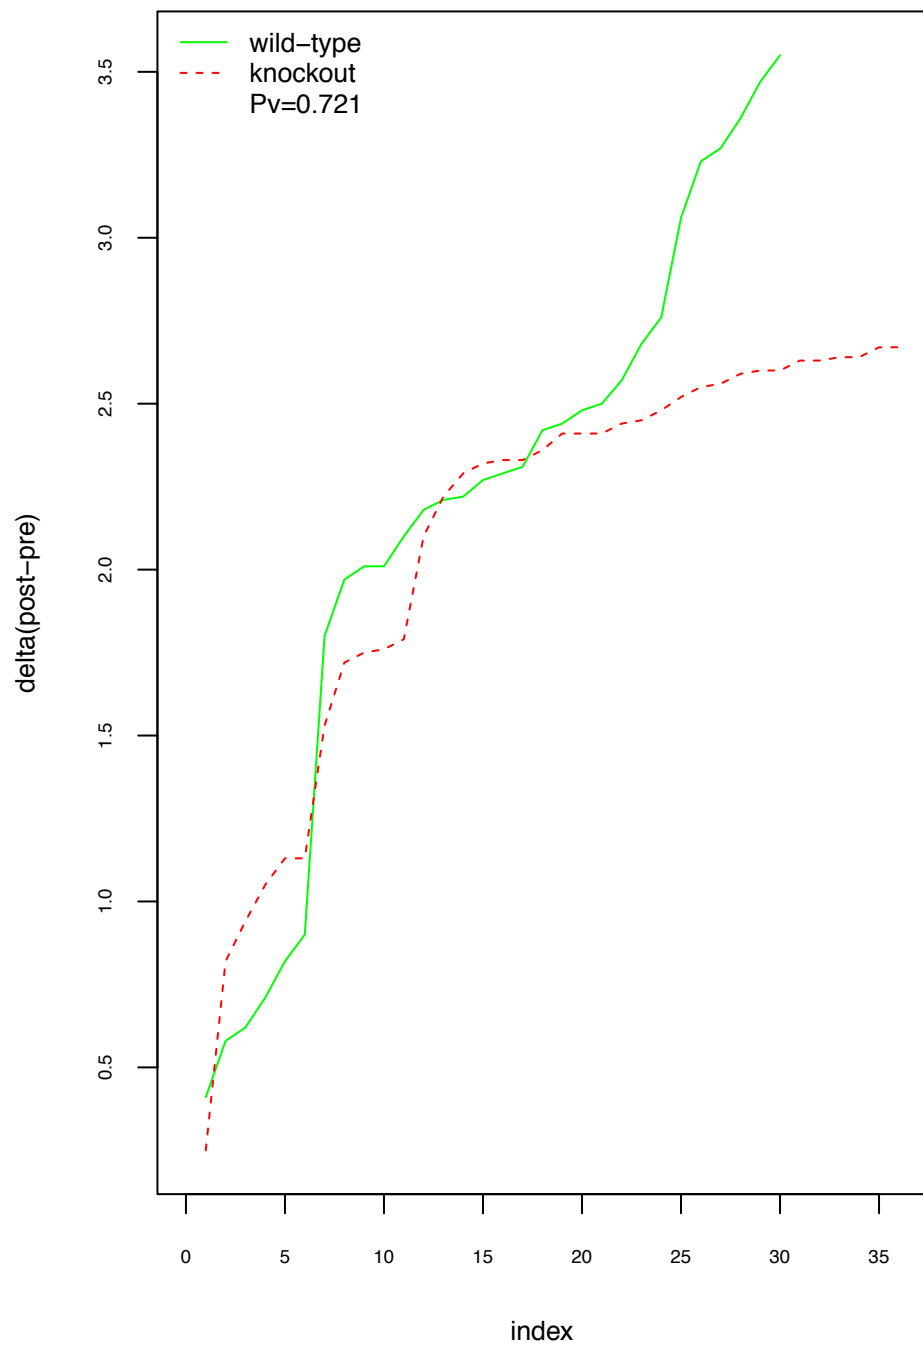

## Bmpr2

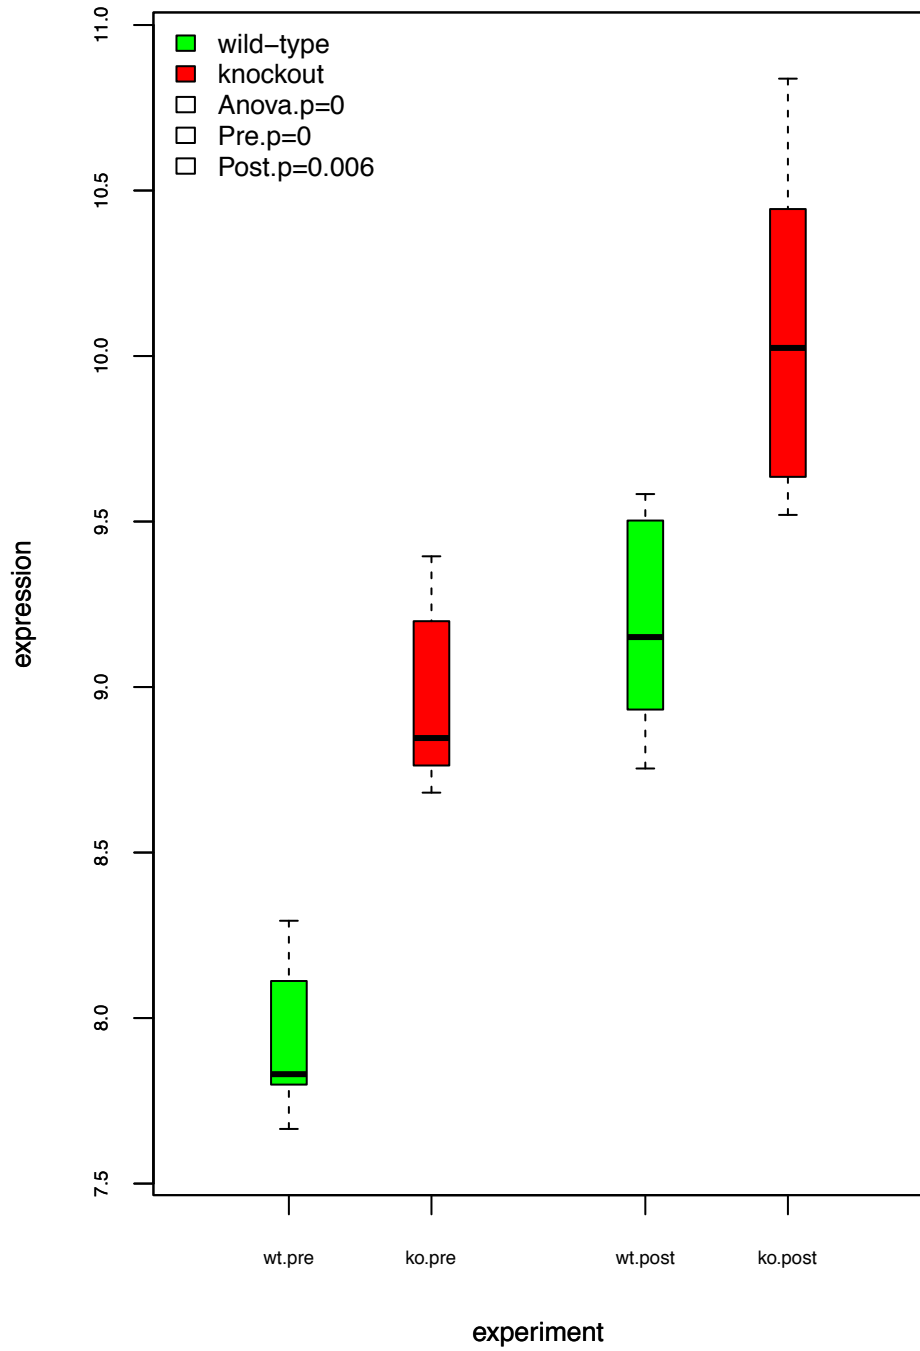

## Bmpr2

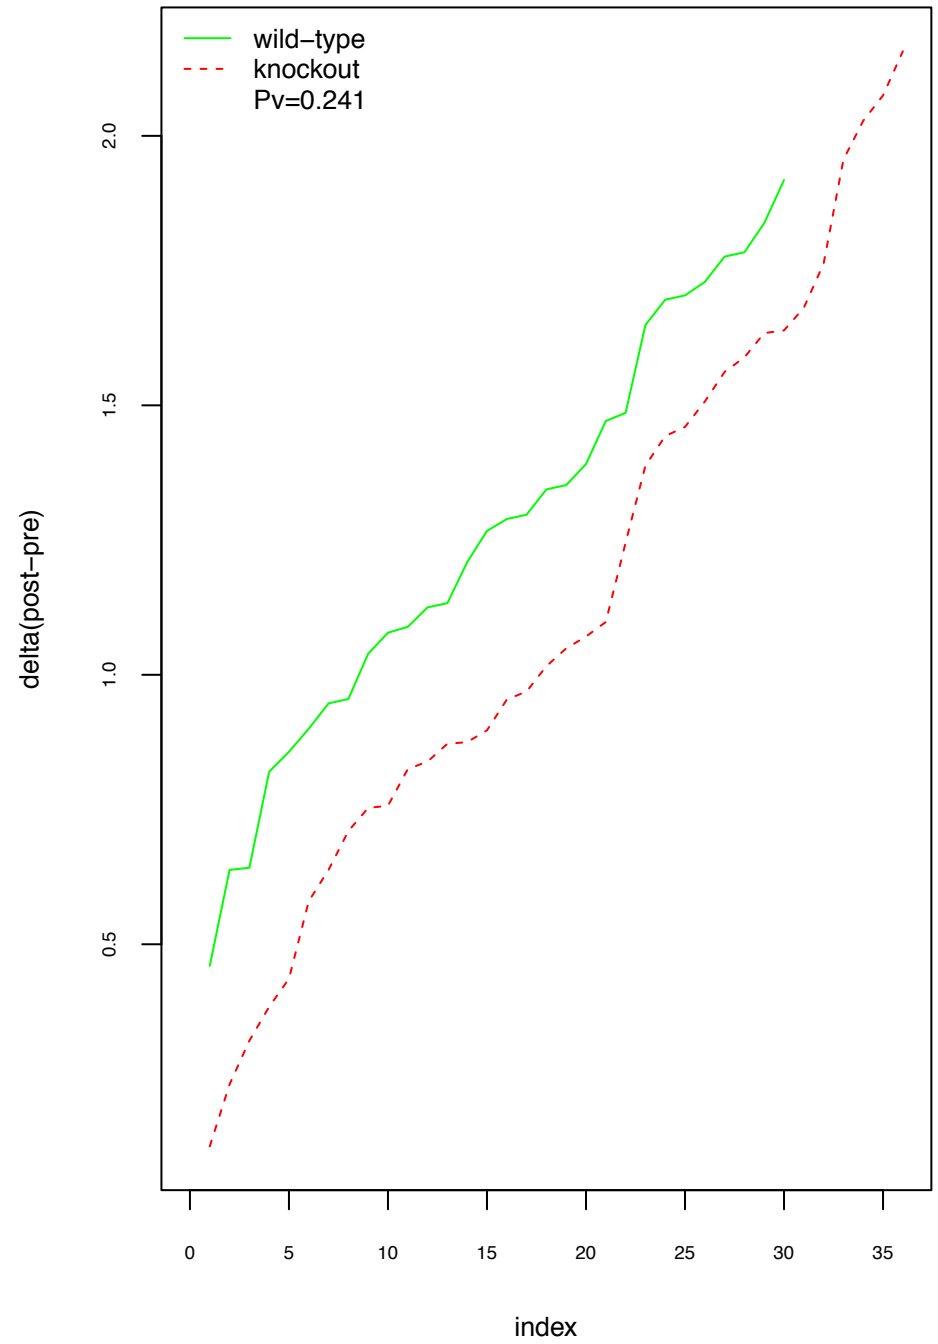

### Bmp7

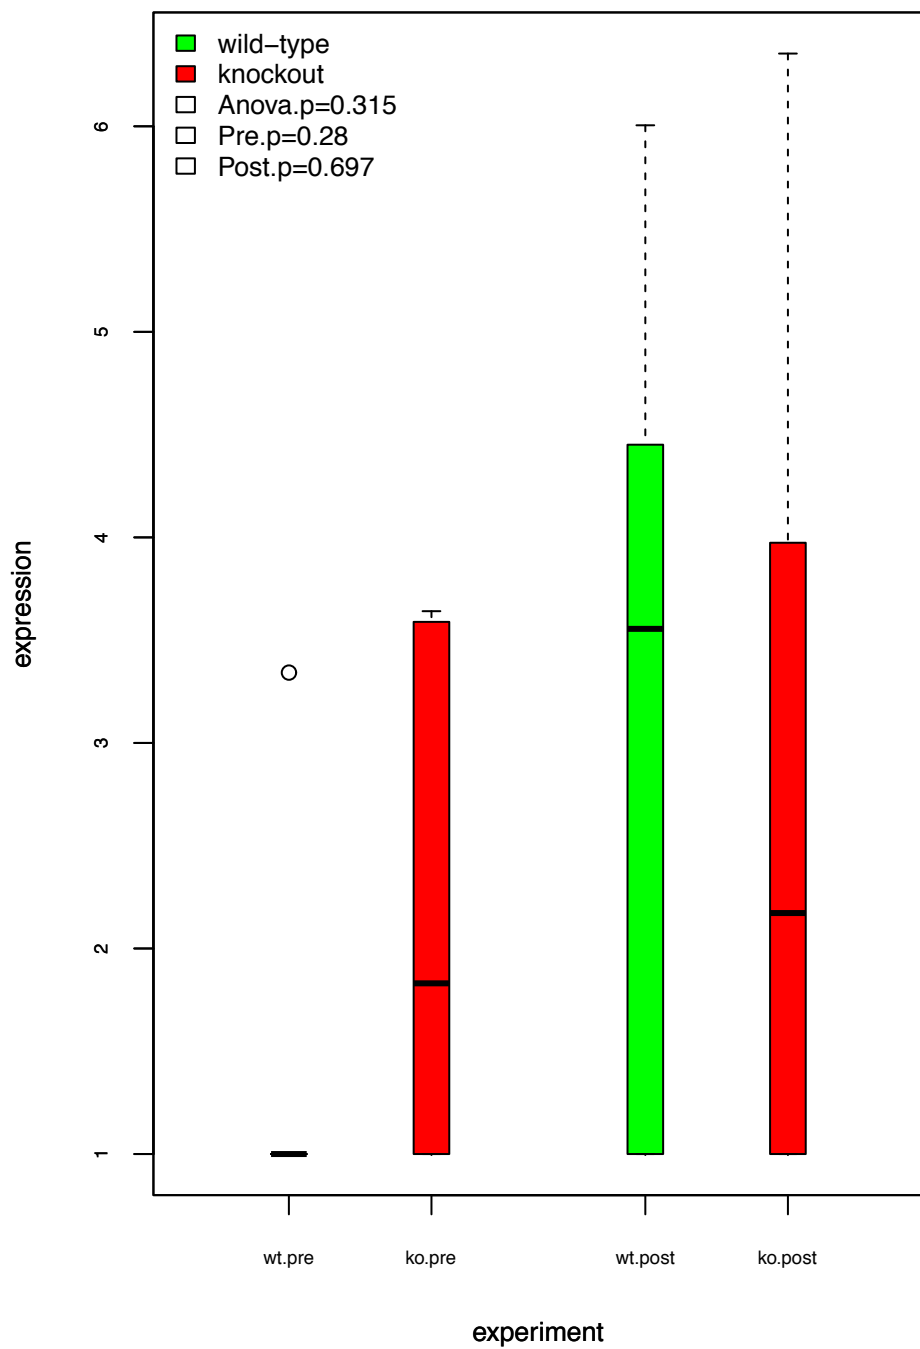

### Bmp7

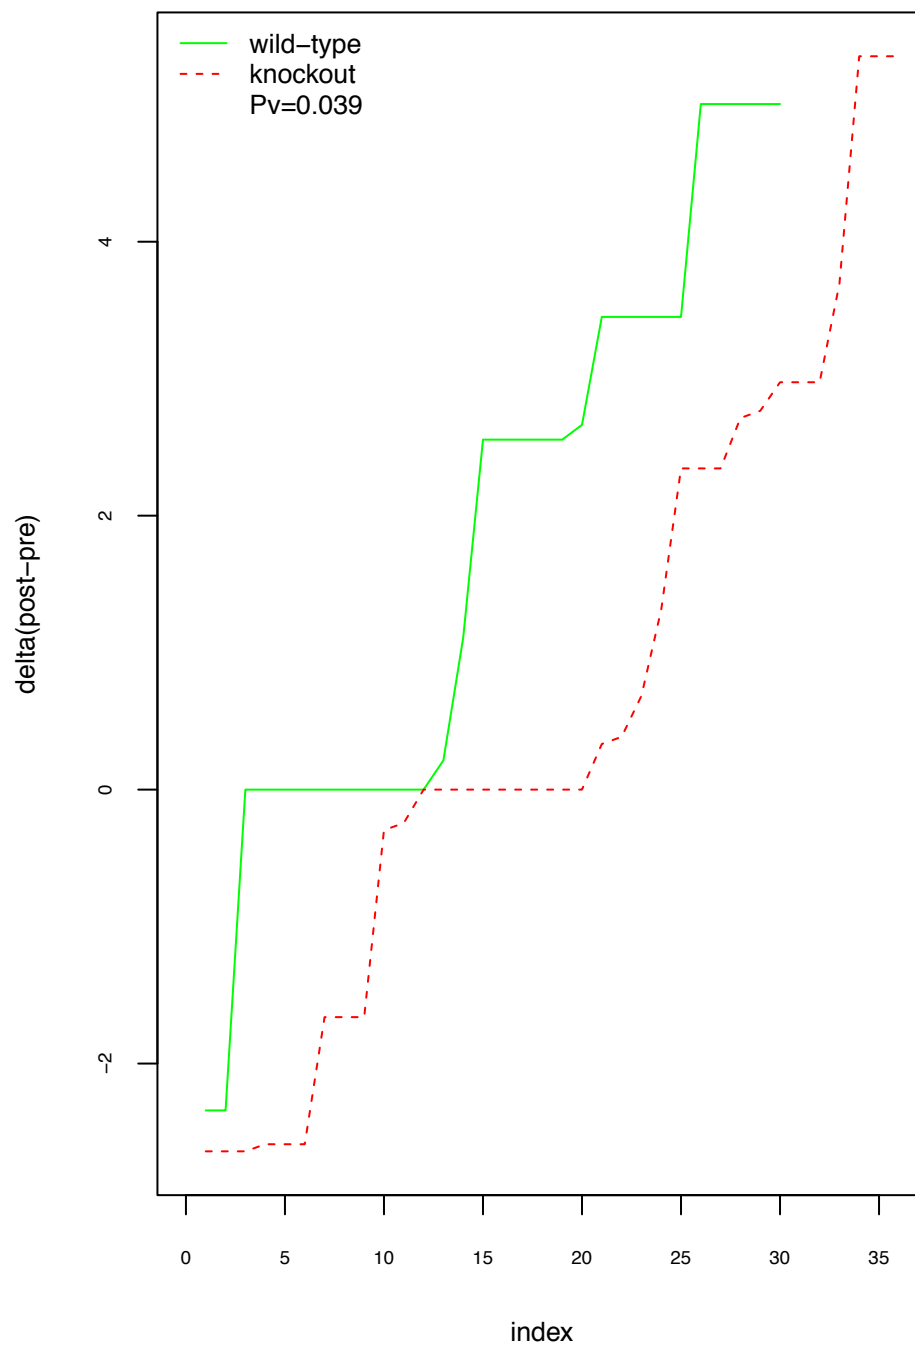

## Bmp5

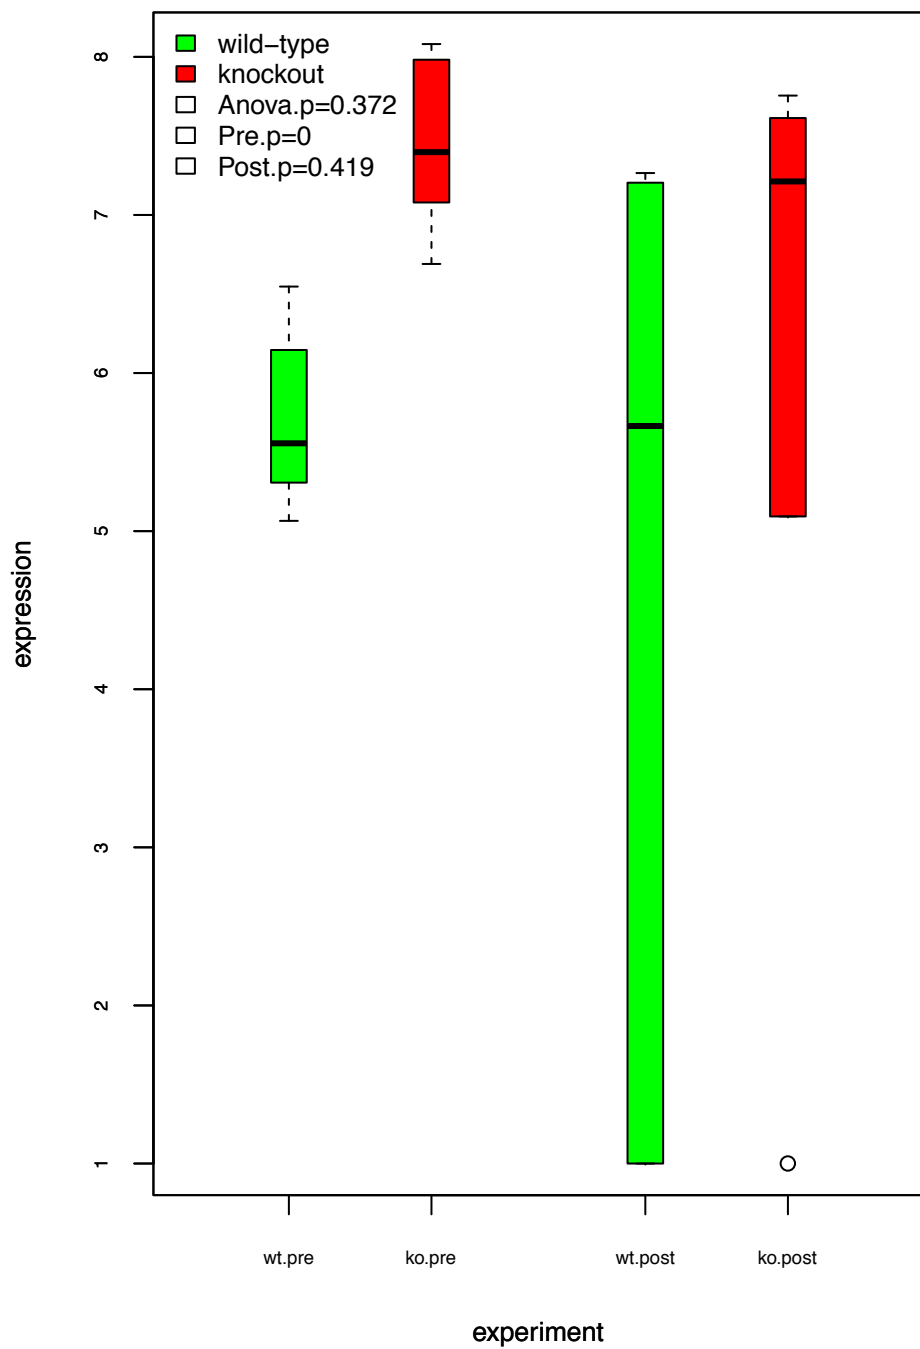

## Bmp5

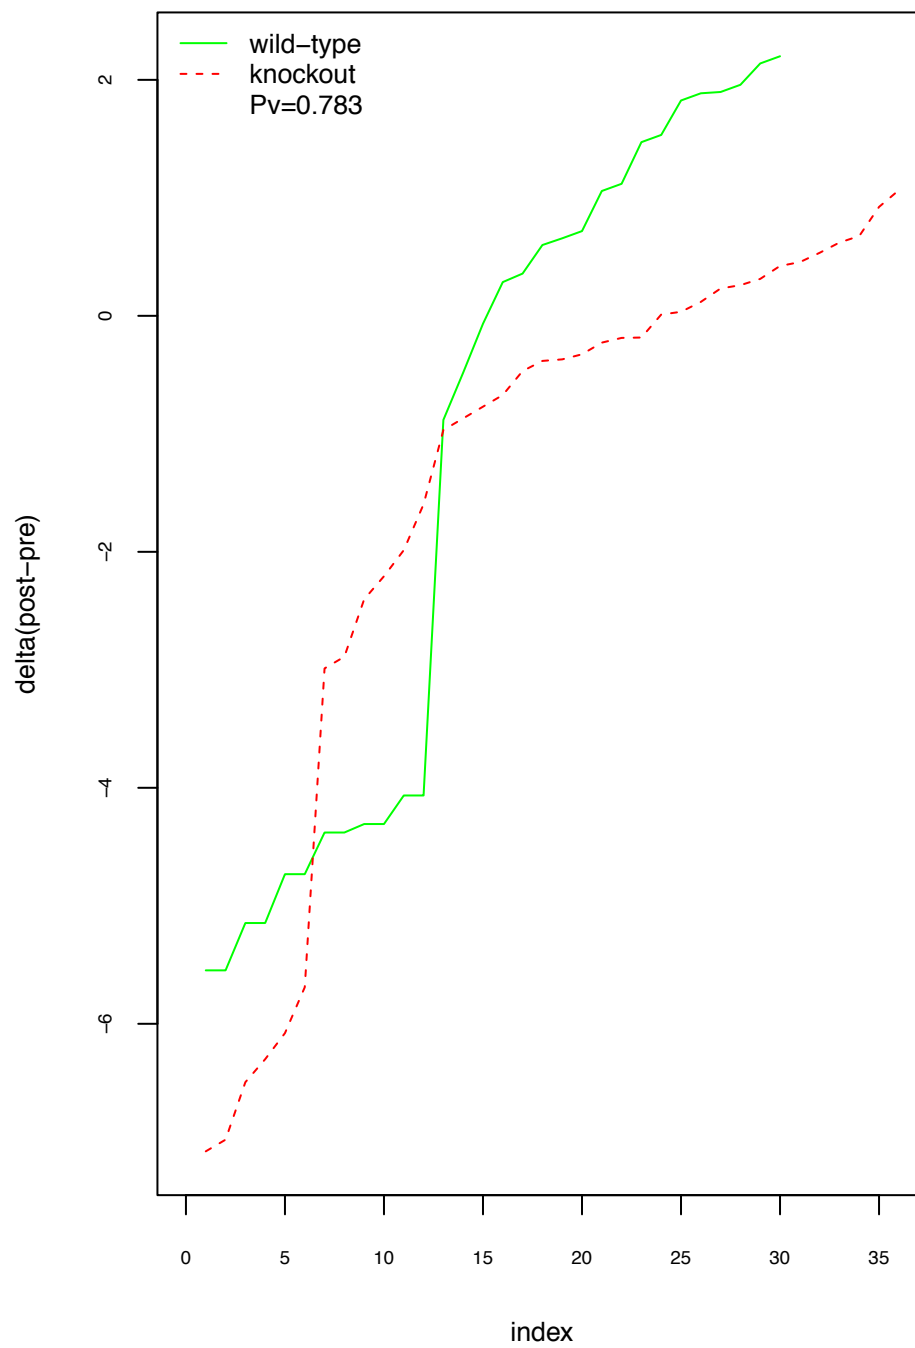

### Bmp4

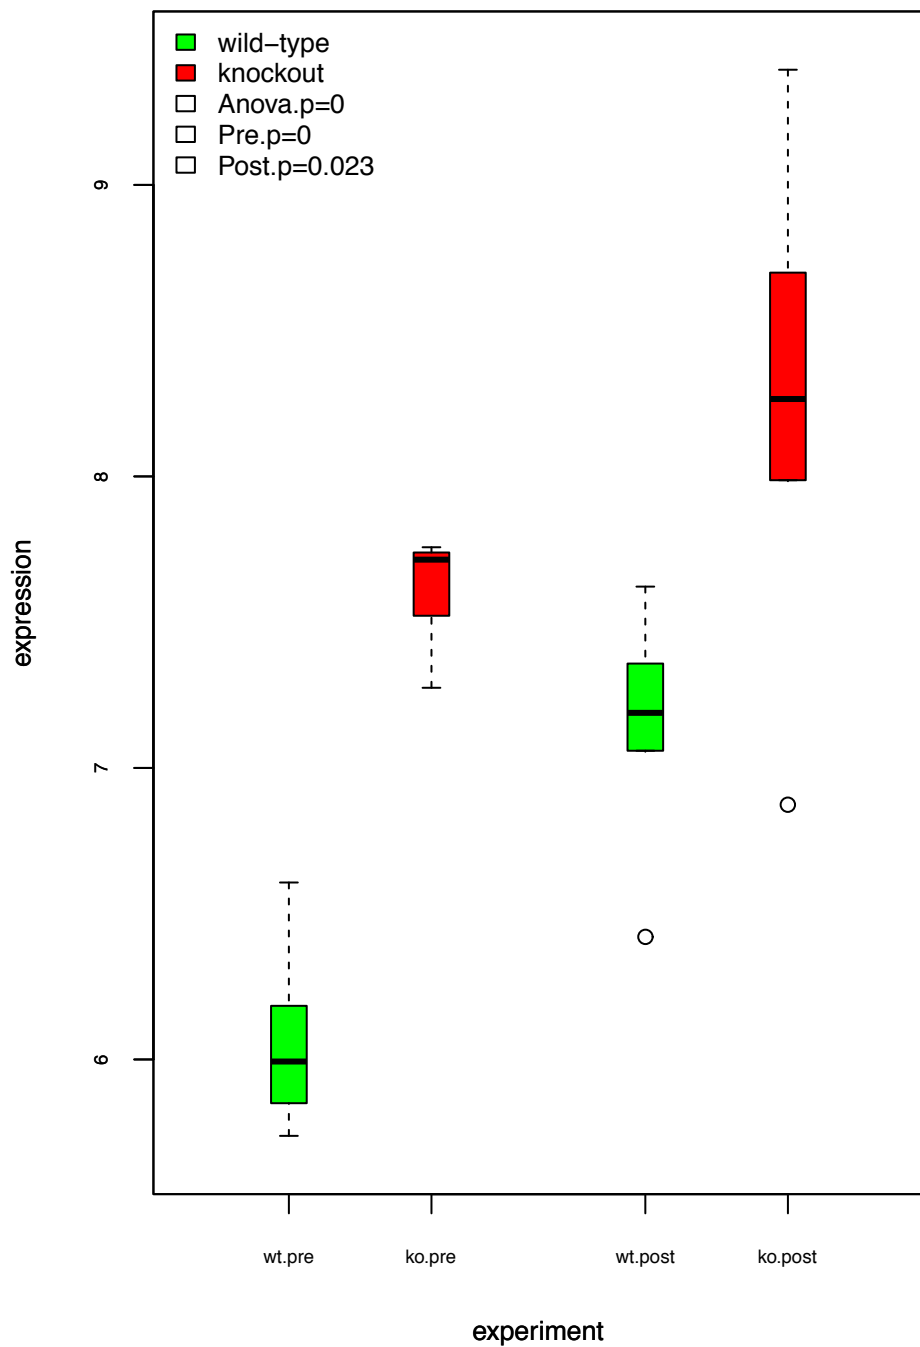

### Bmp4

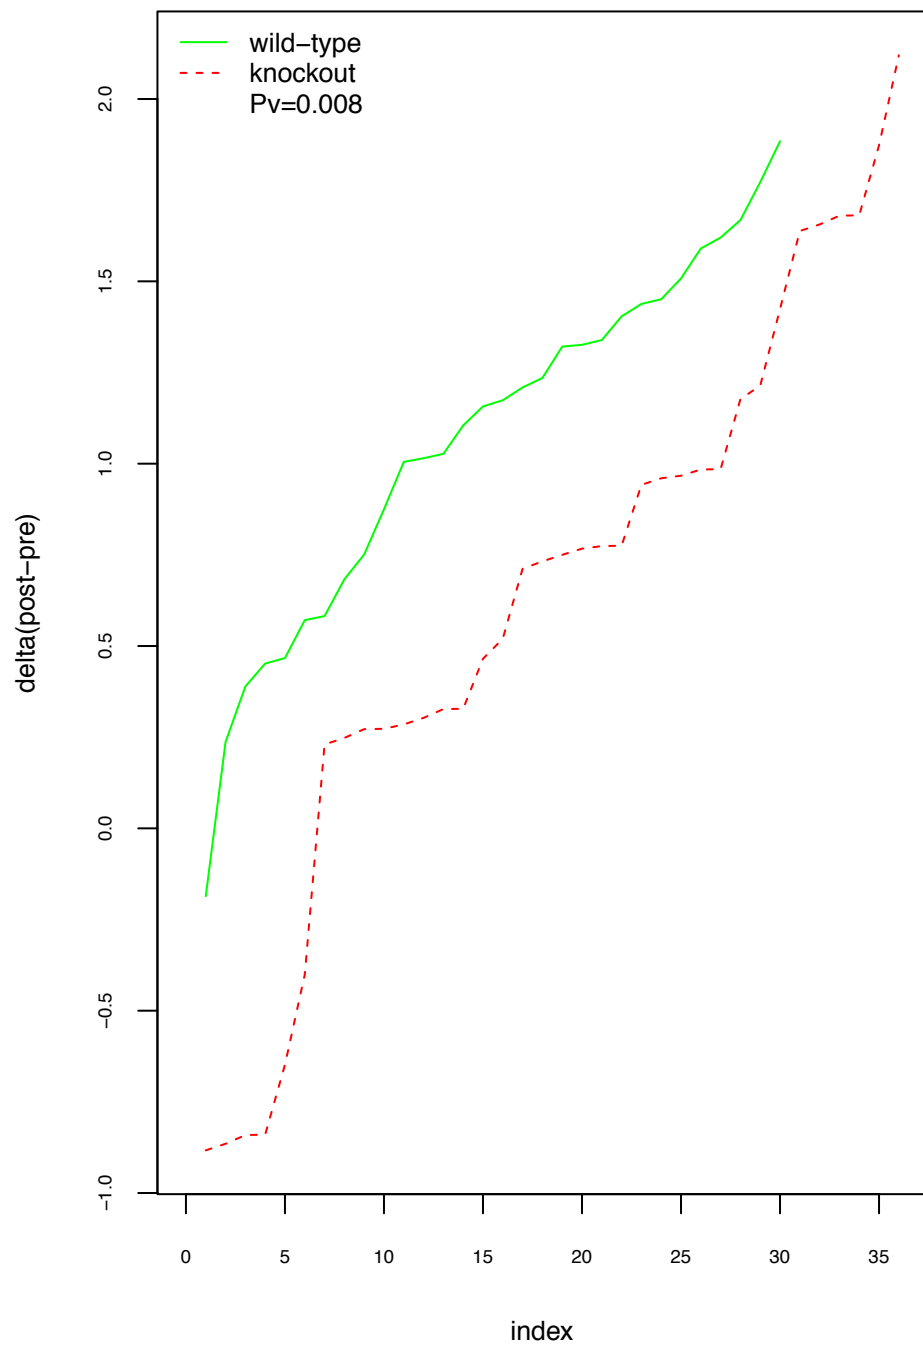



### Bmp3

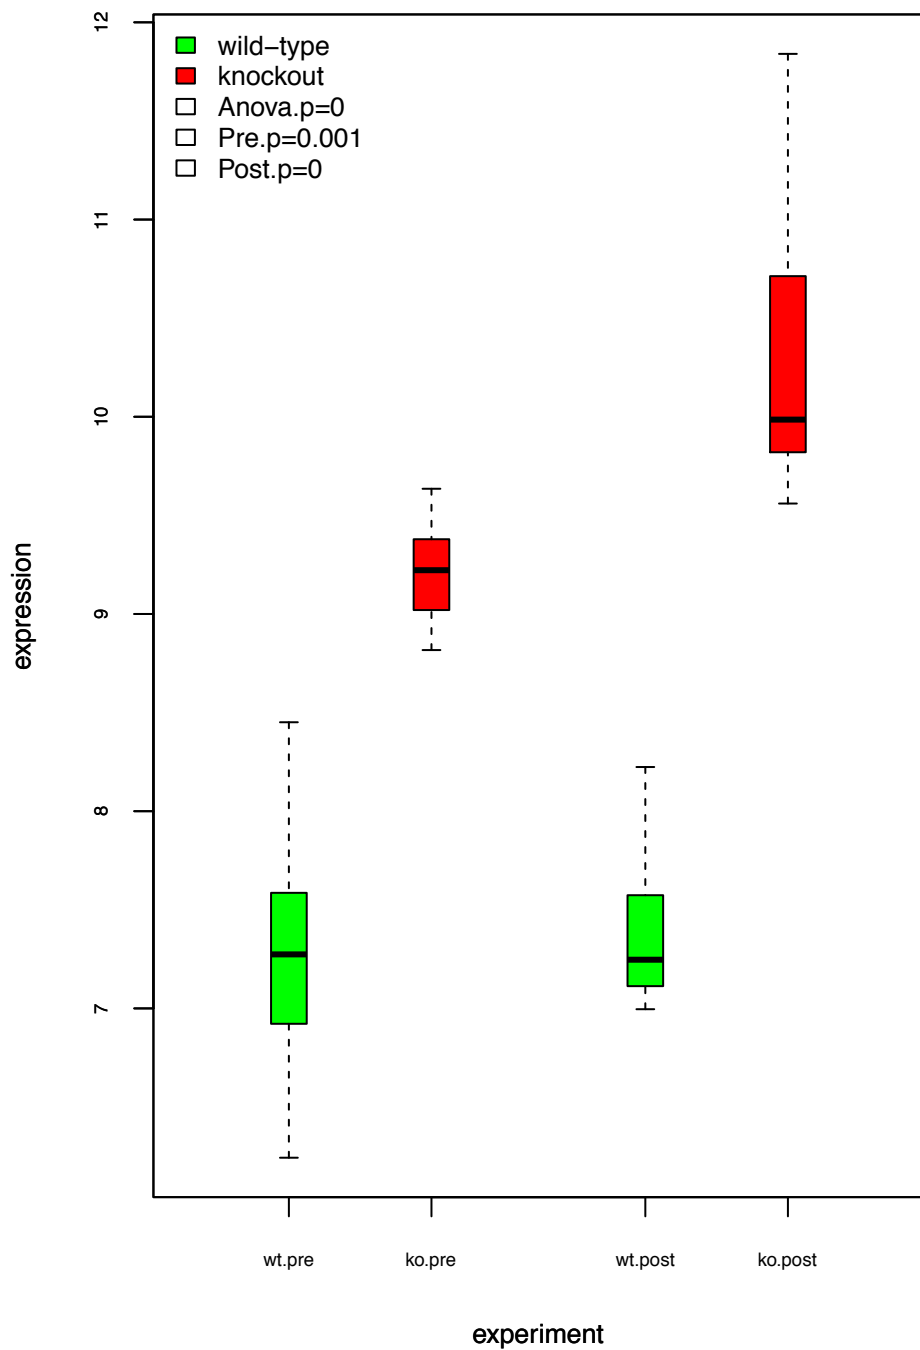

### Bmp3

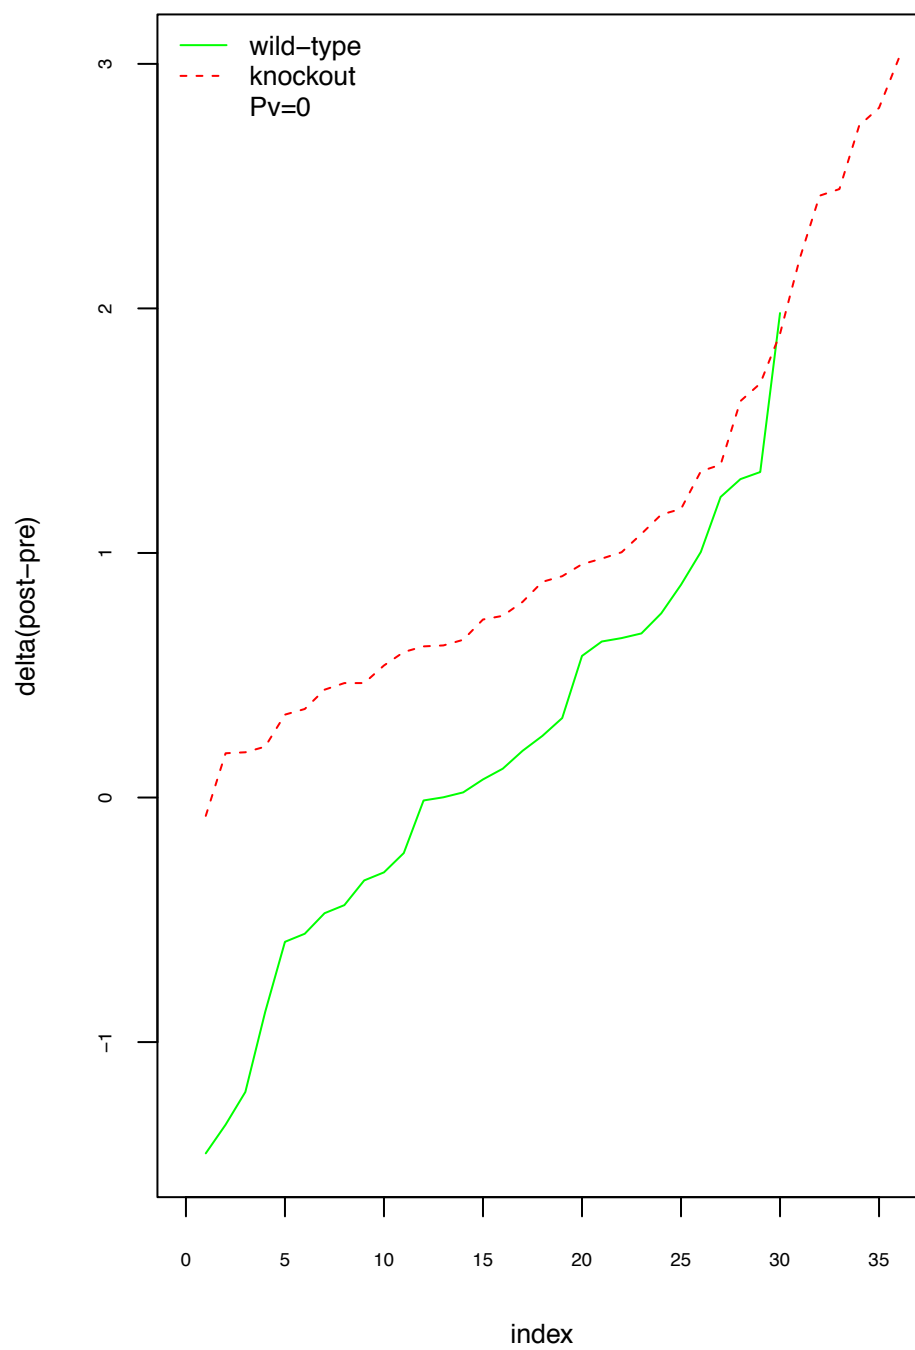

### Bmp2

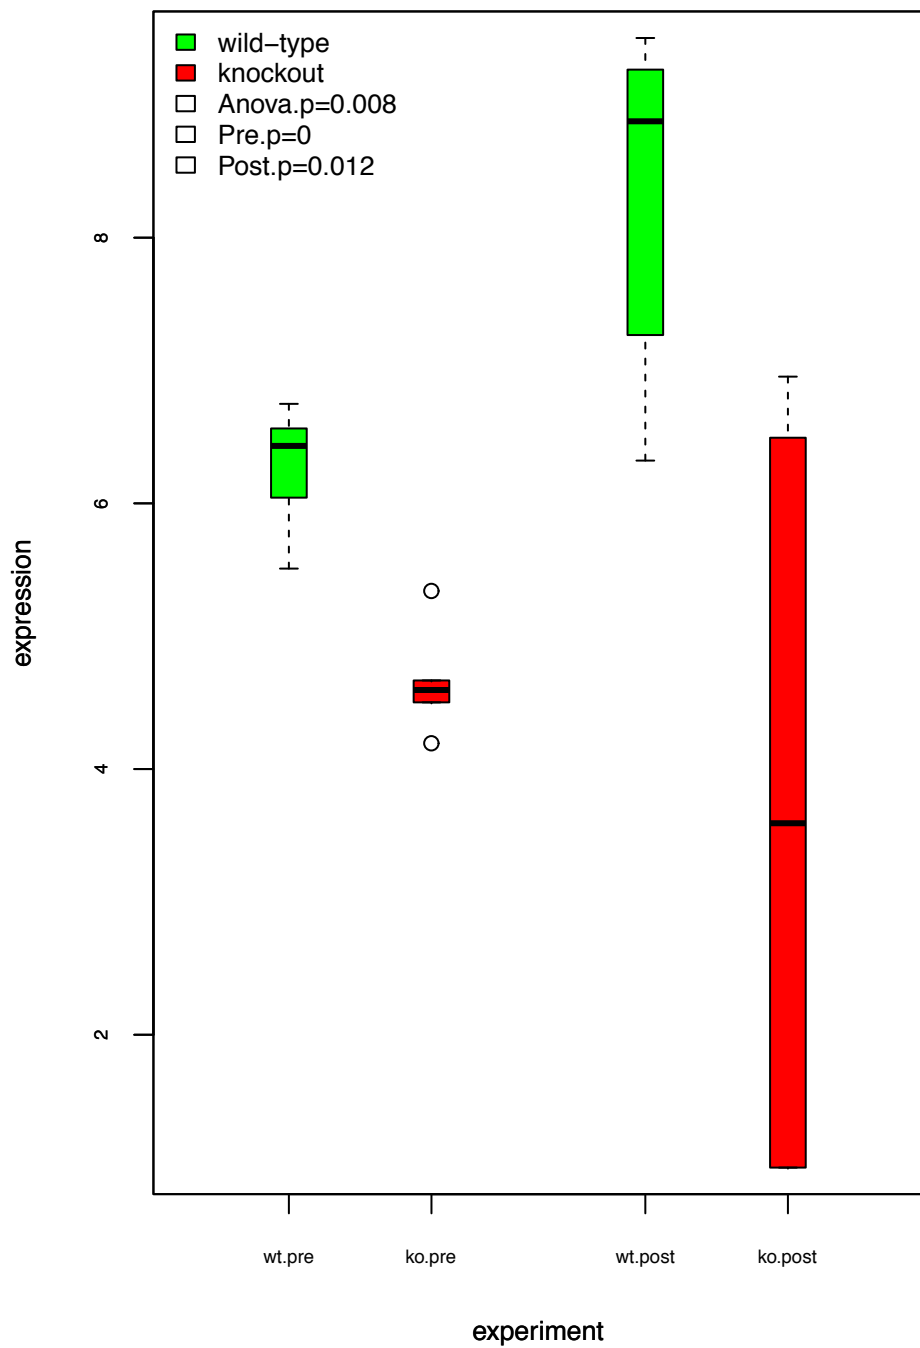

### Bmp2

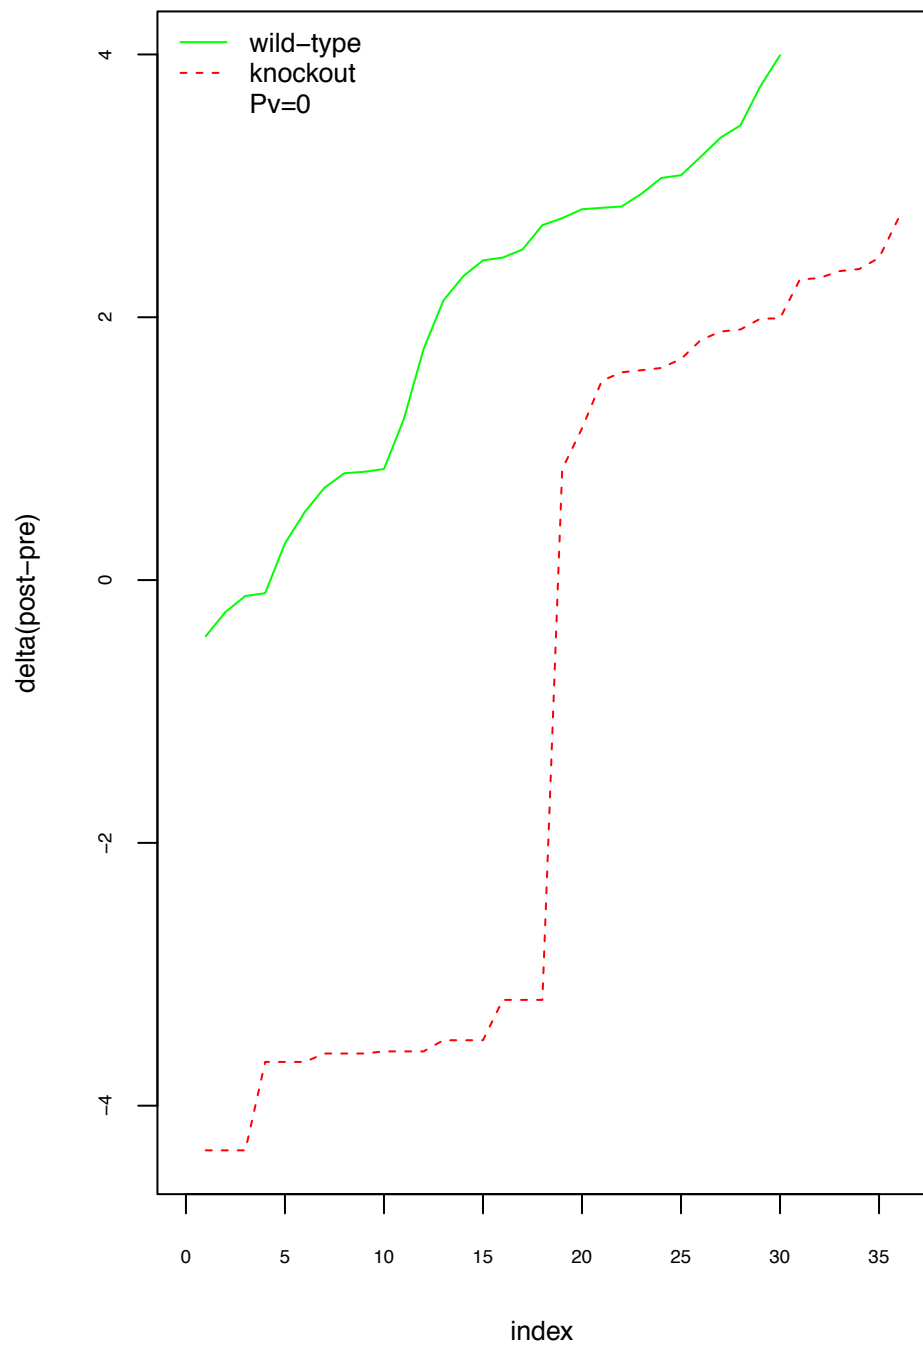

### Bmp1

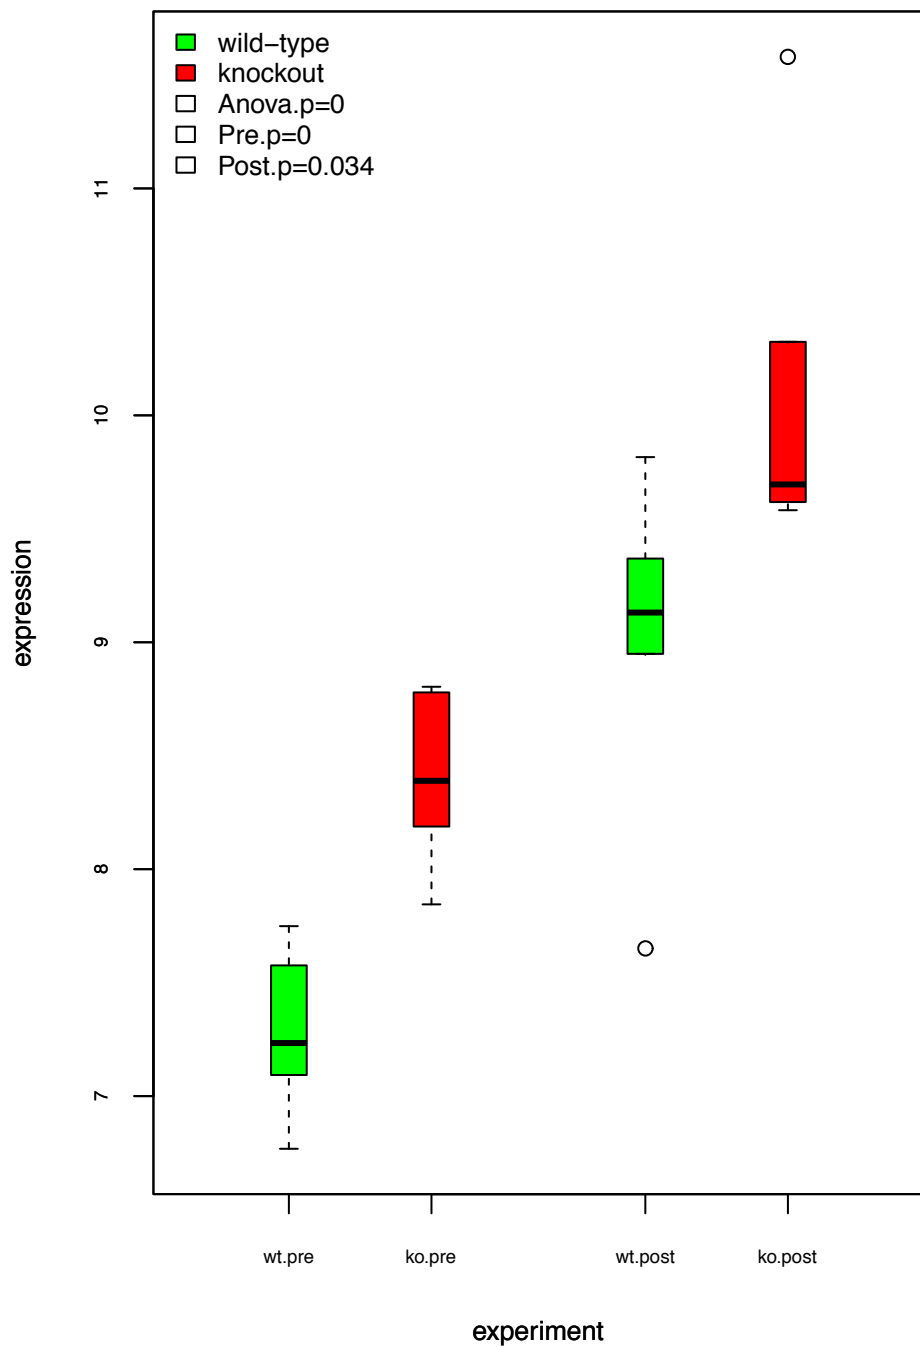

### Bmp1

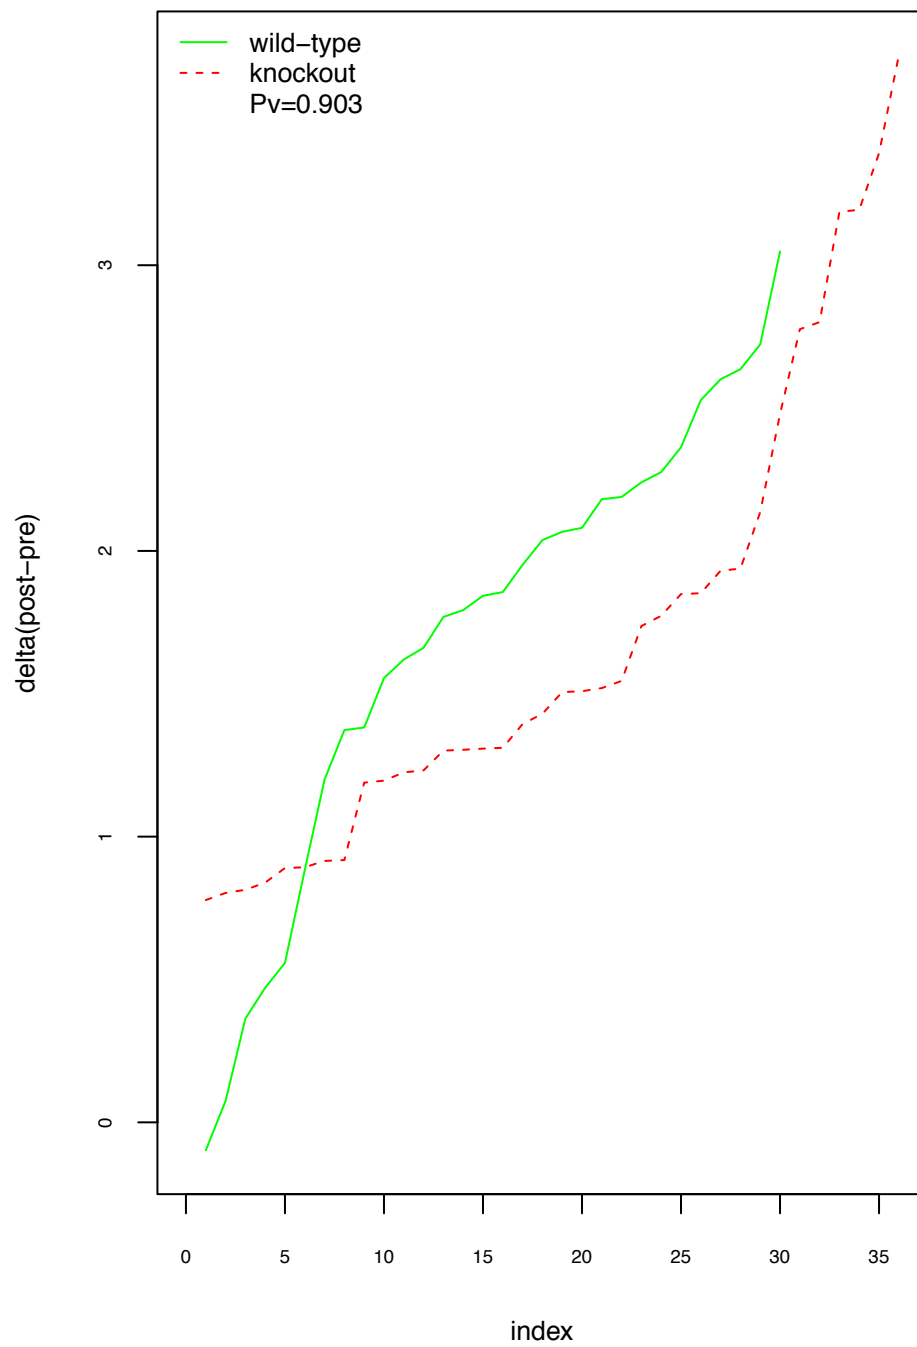

## Bglap2

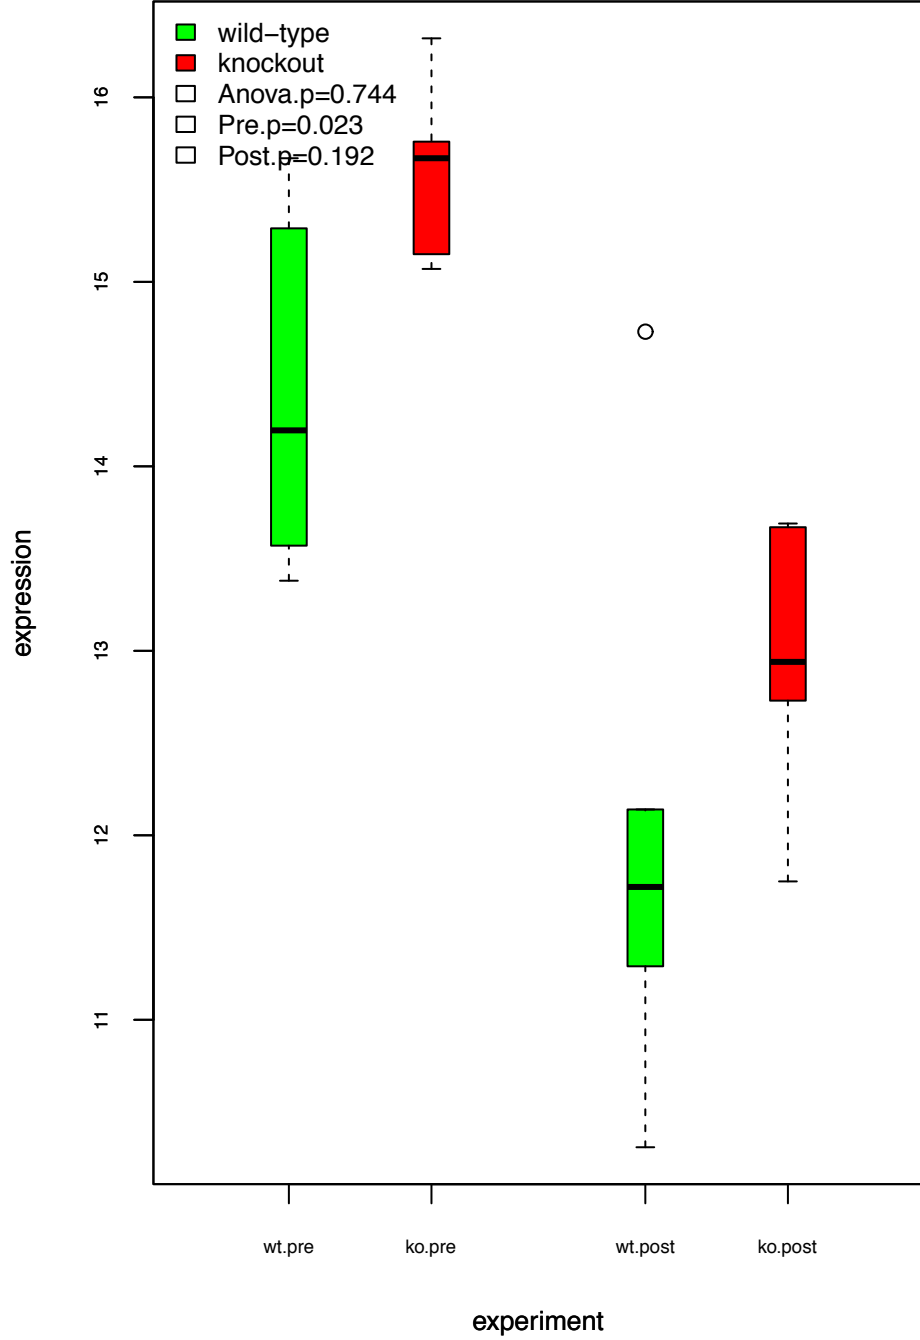

## Bglap2

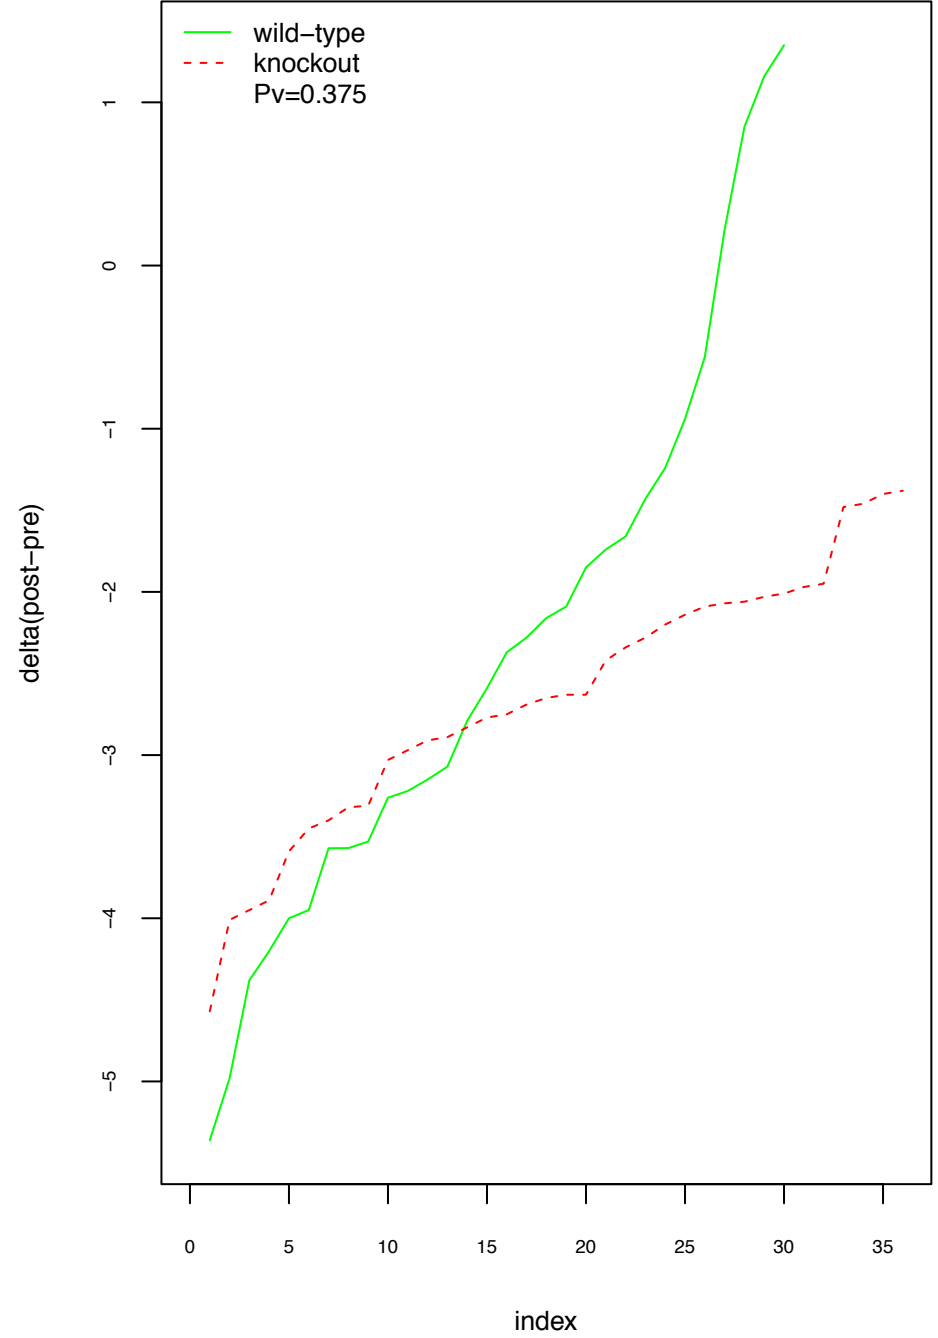

**beta-cat(Ctnnb1)**

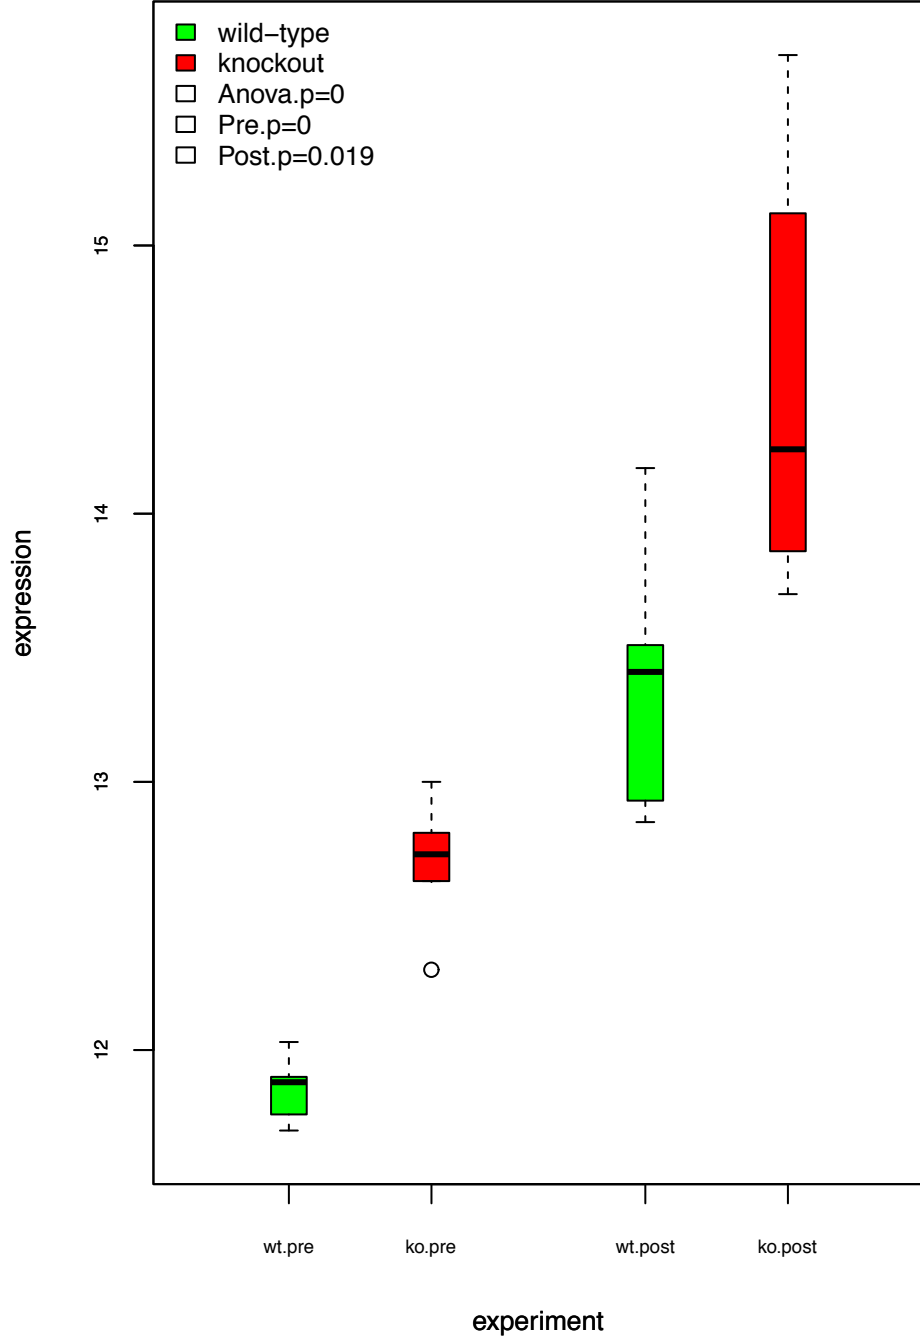

**beta-cat(Ctnnb1)**

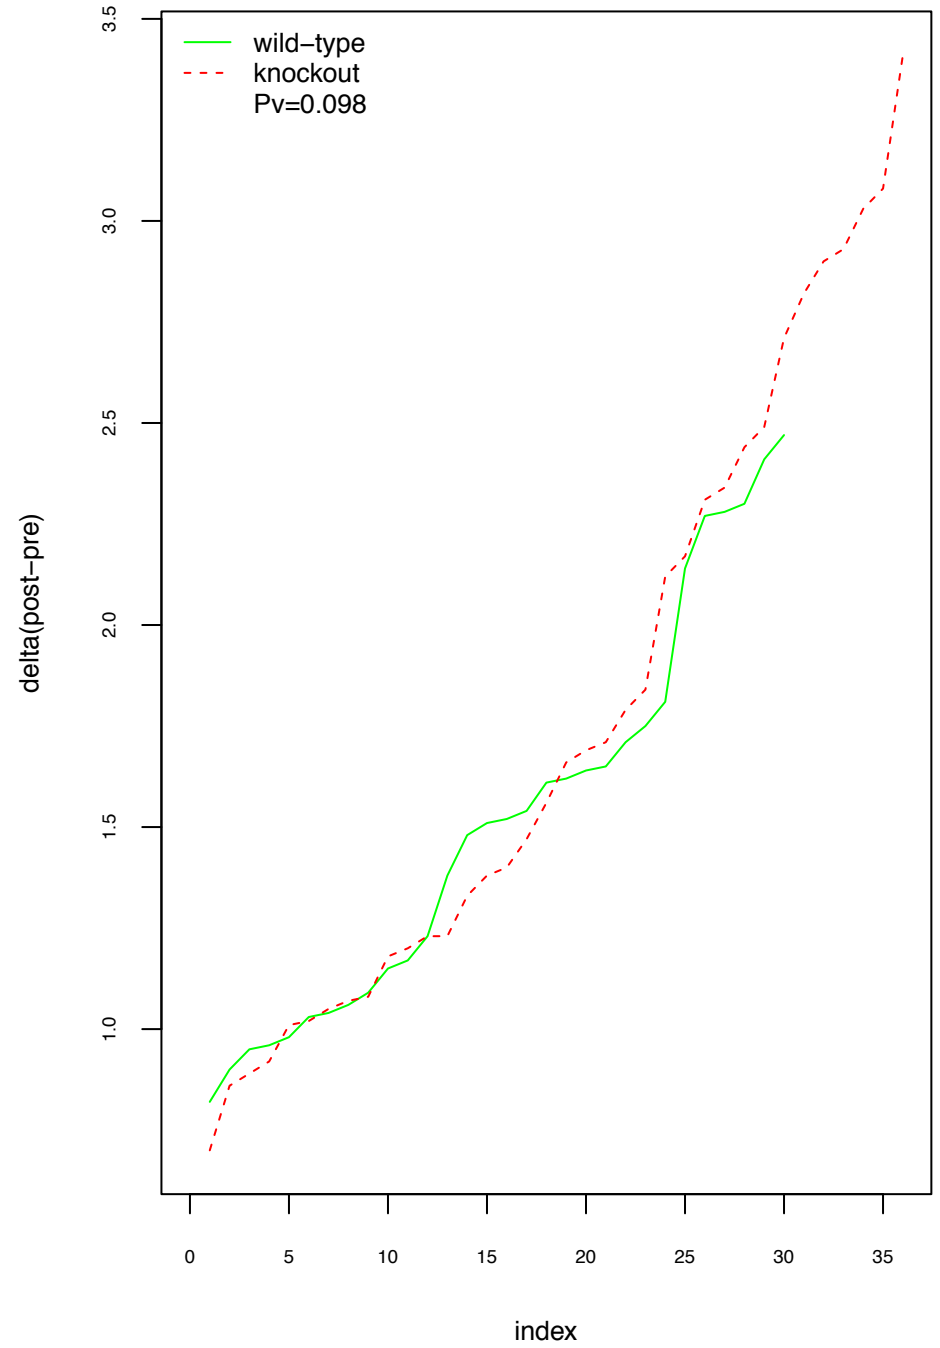

**Beta-actin**

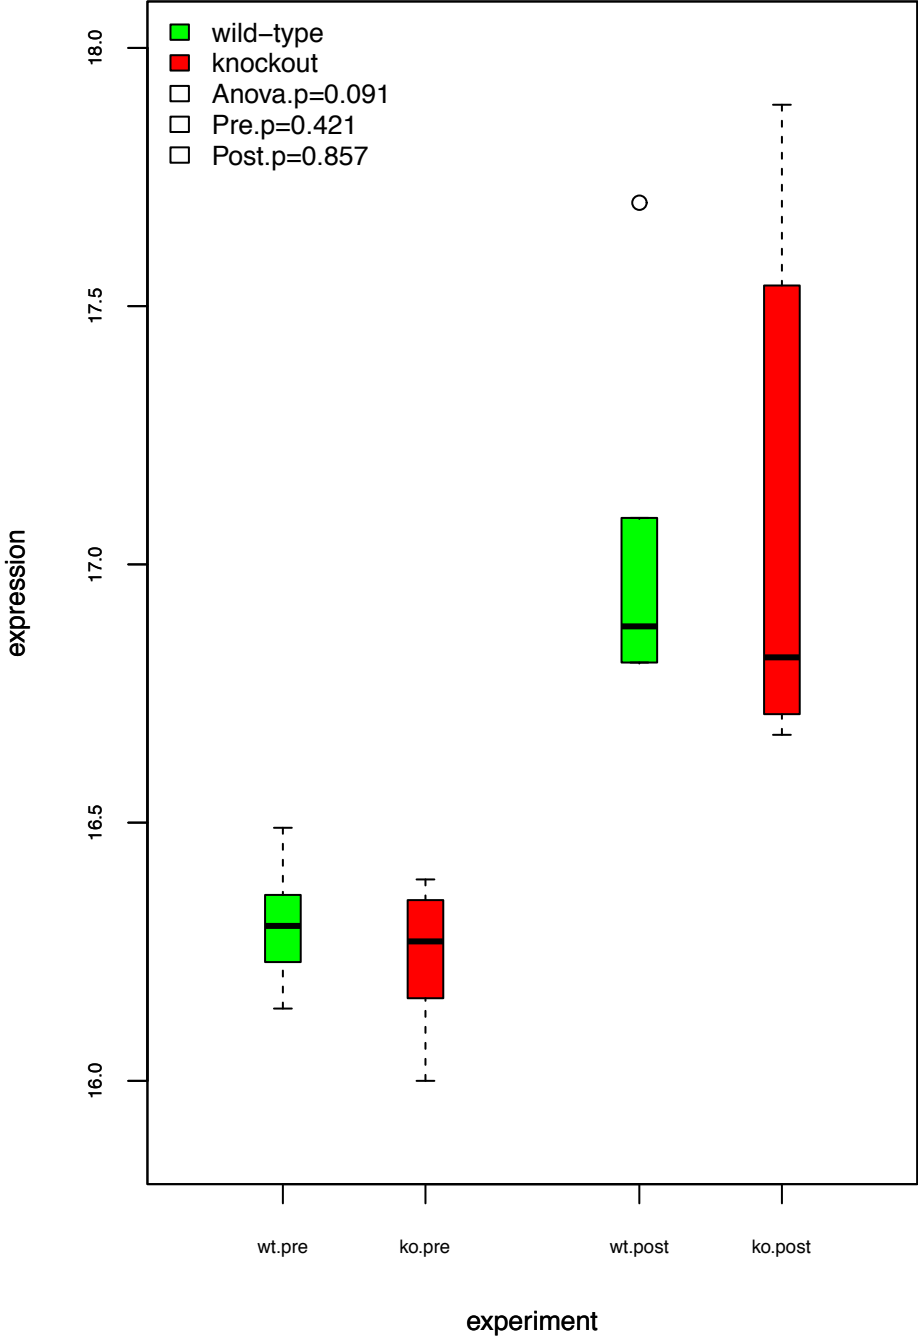

**Beta-actin**

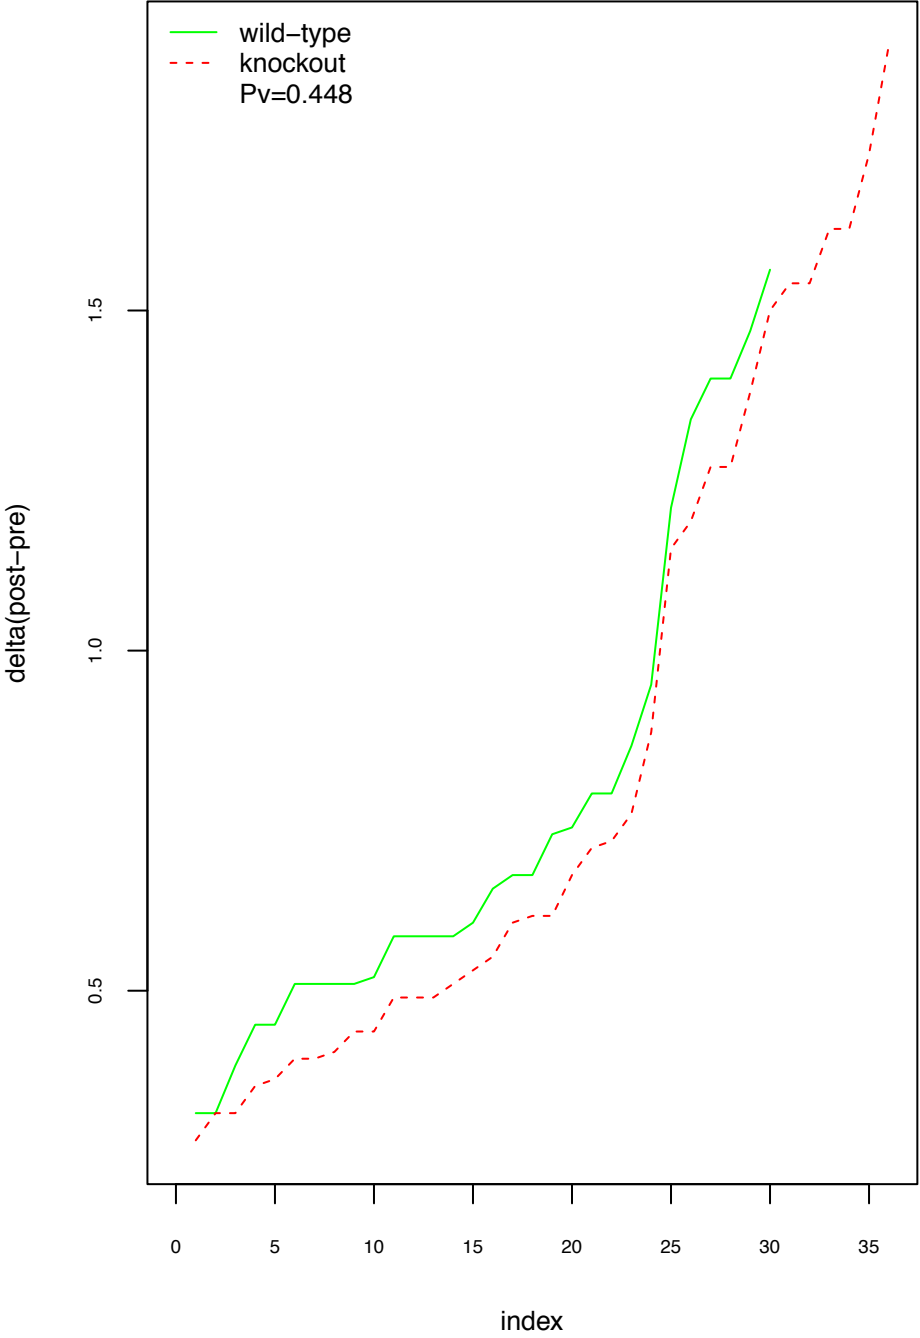

### Bcl2

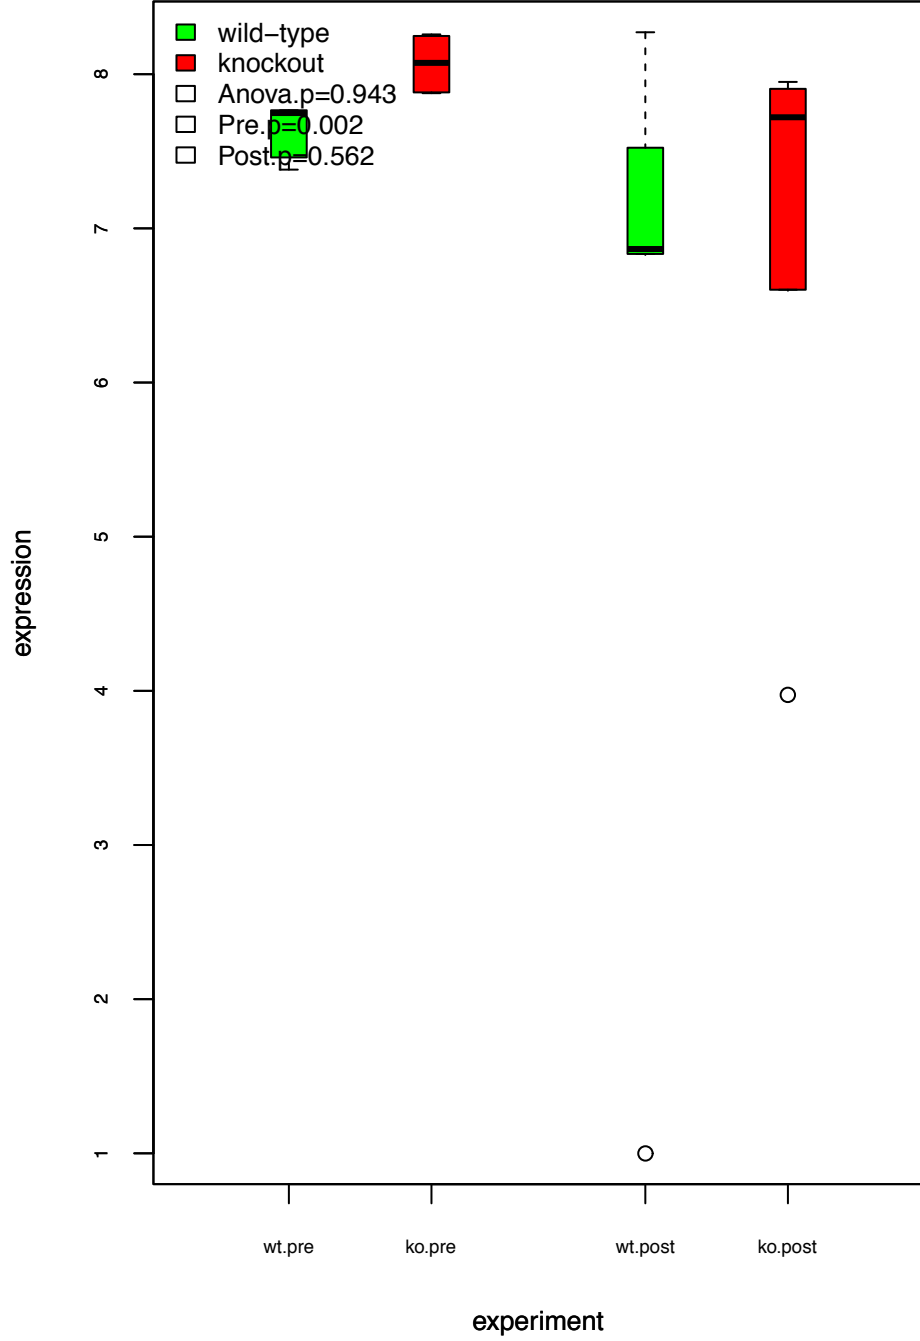

### Bcl2

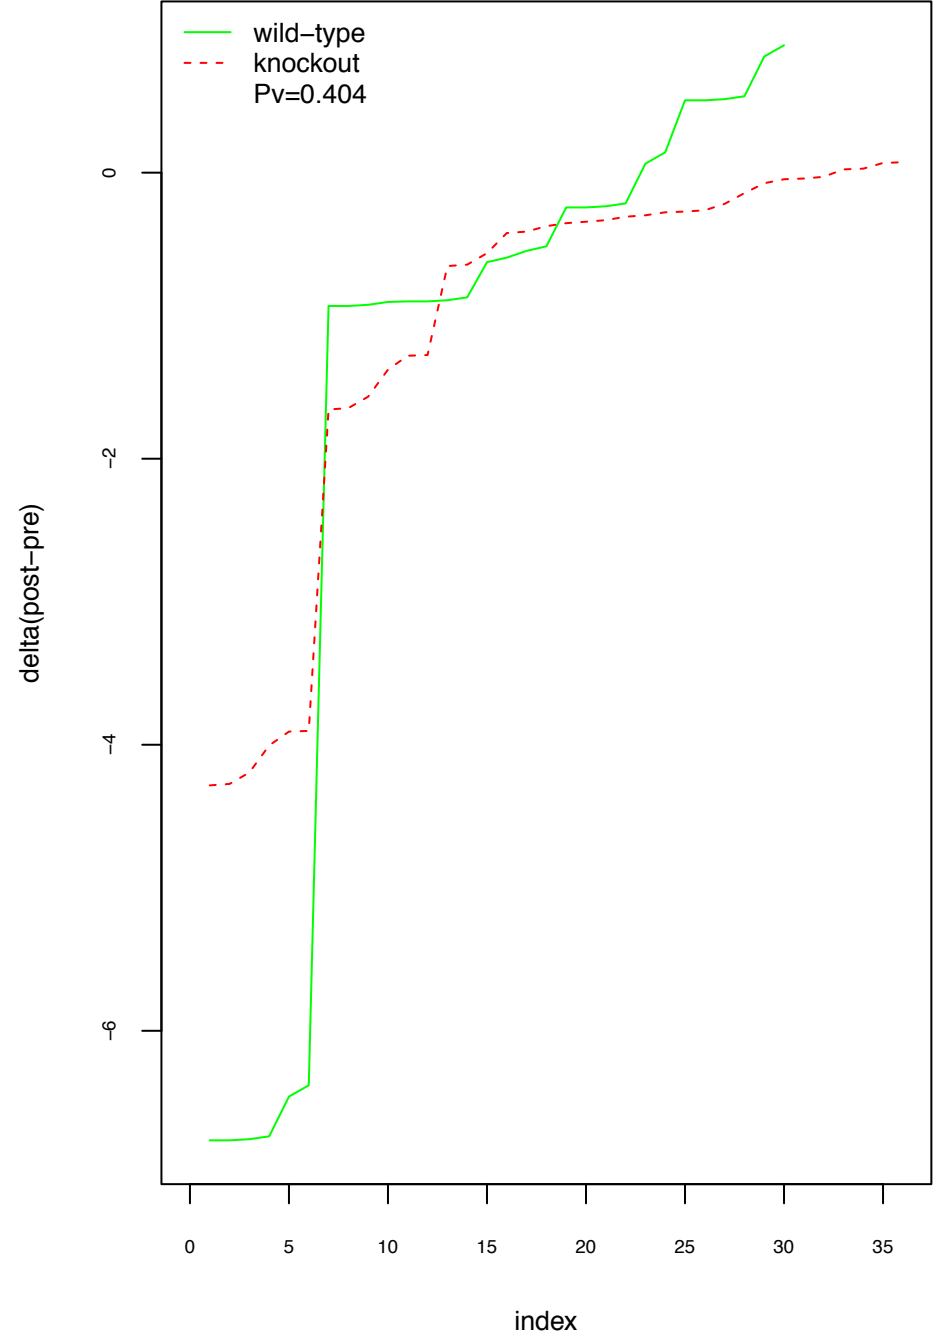

### Bax

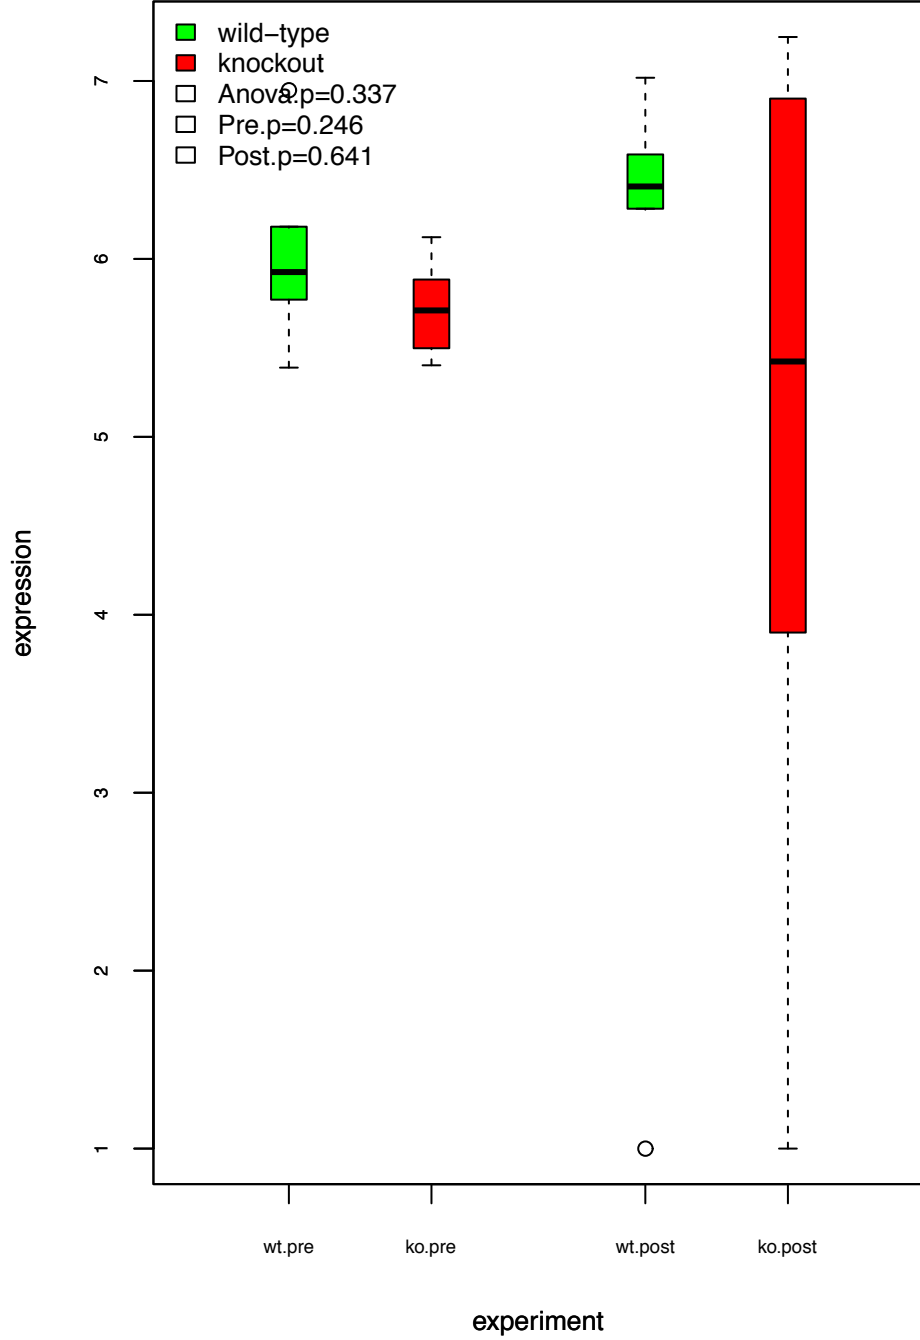

### Bax

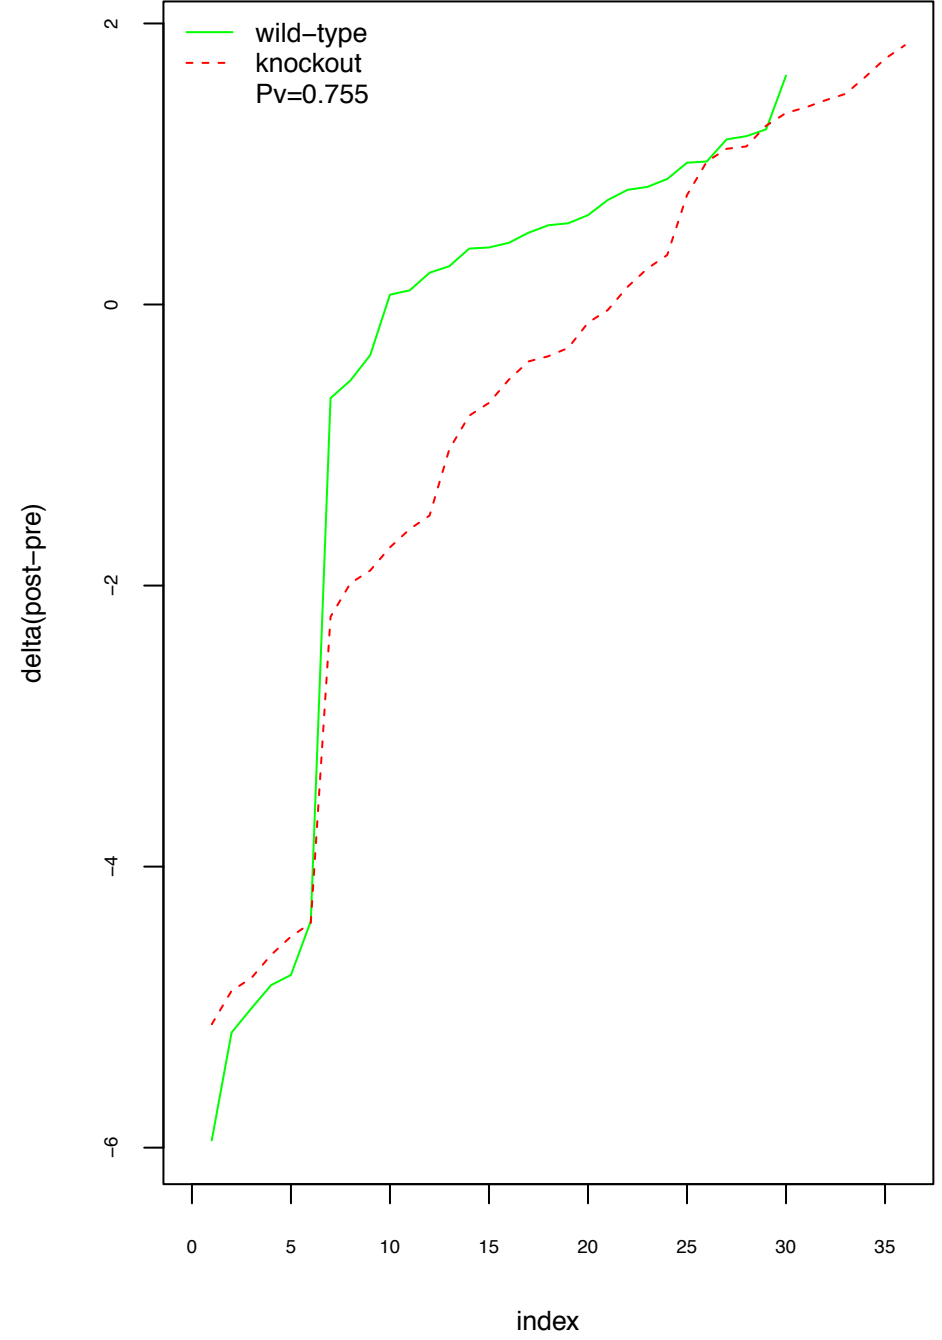



# Ctsk

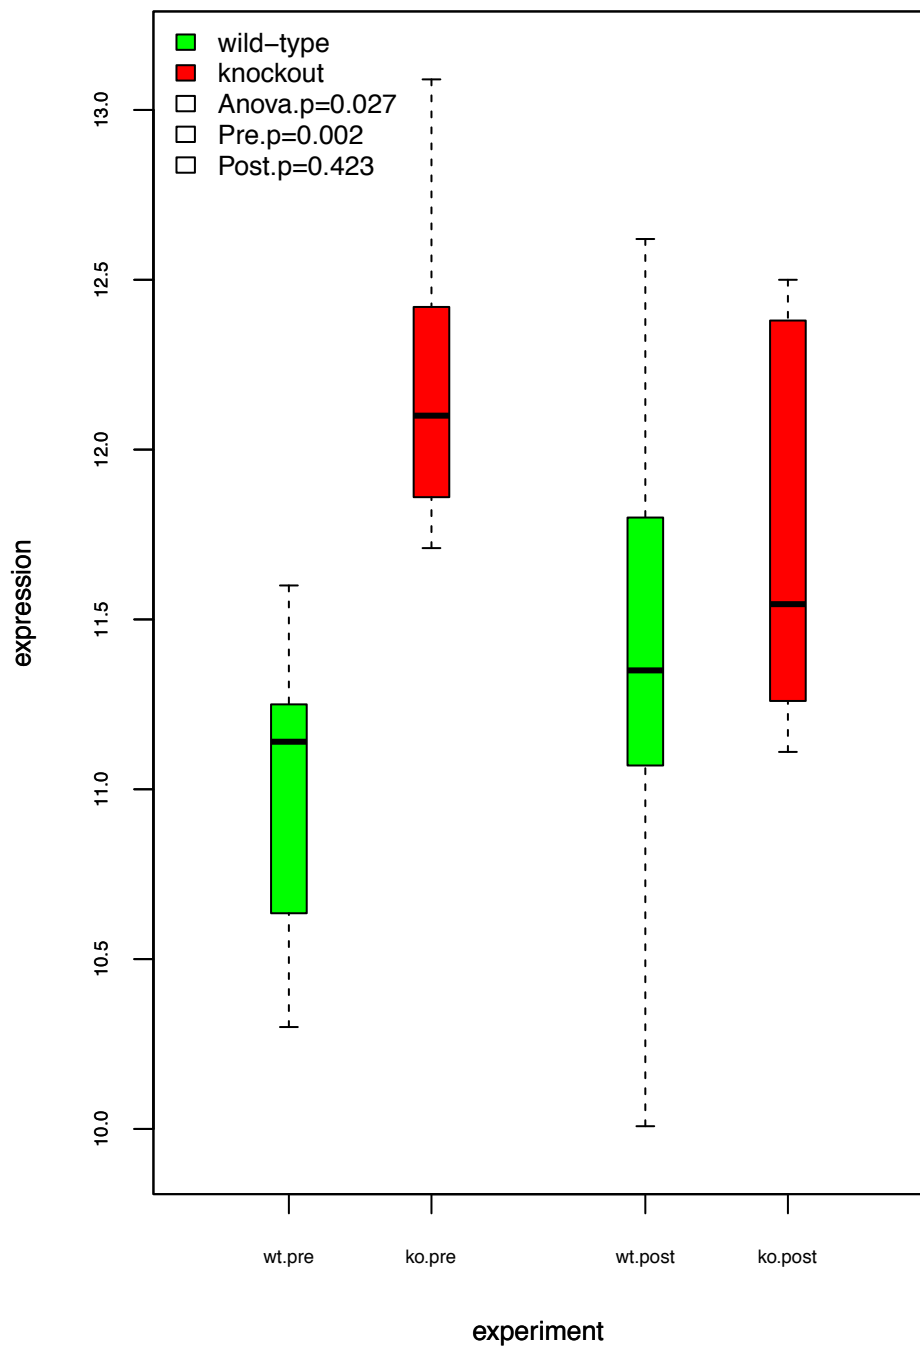

# Ctsk

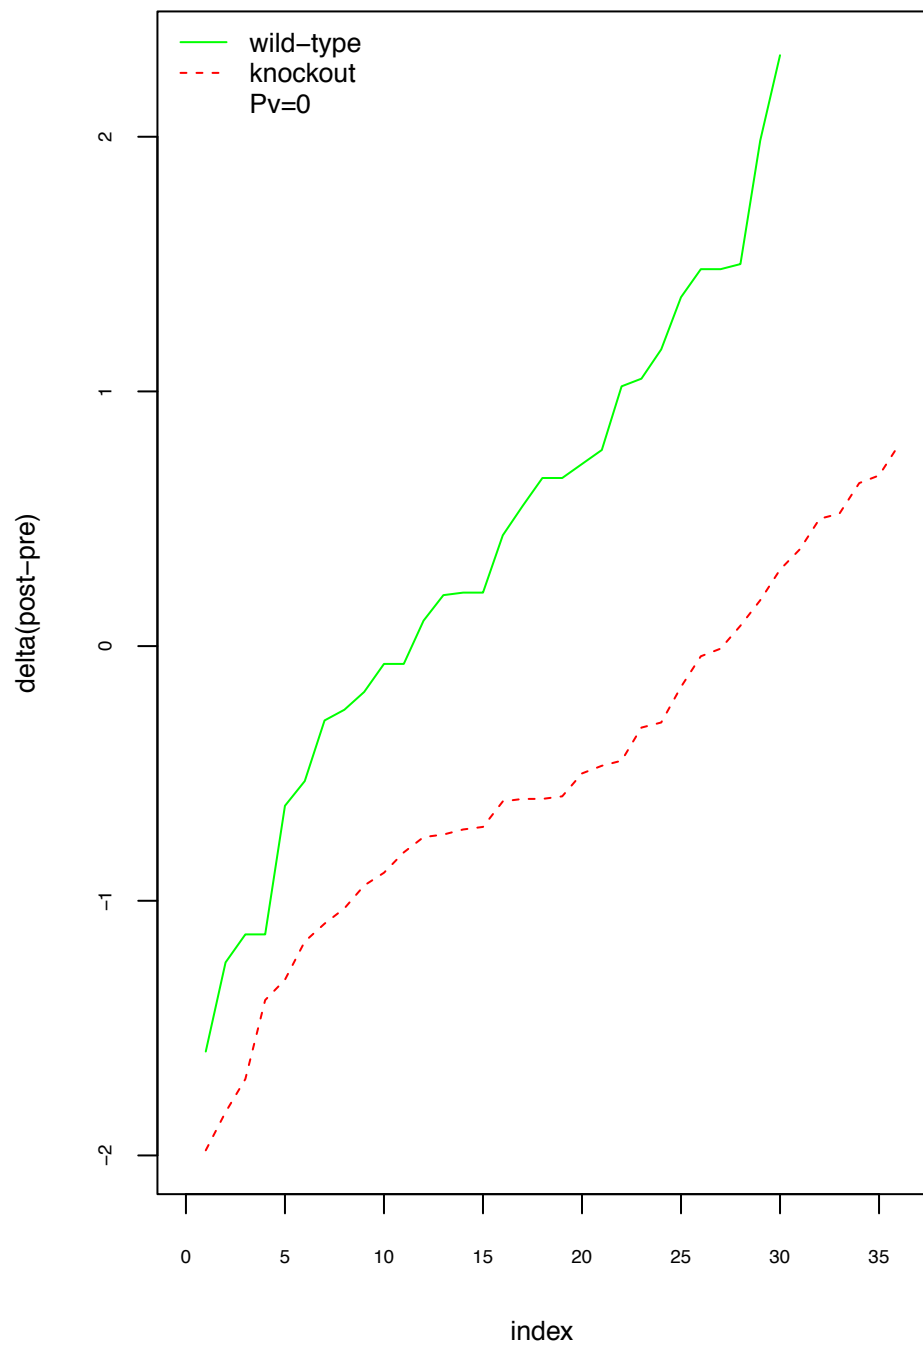

### Ctgf

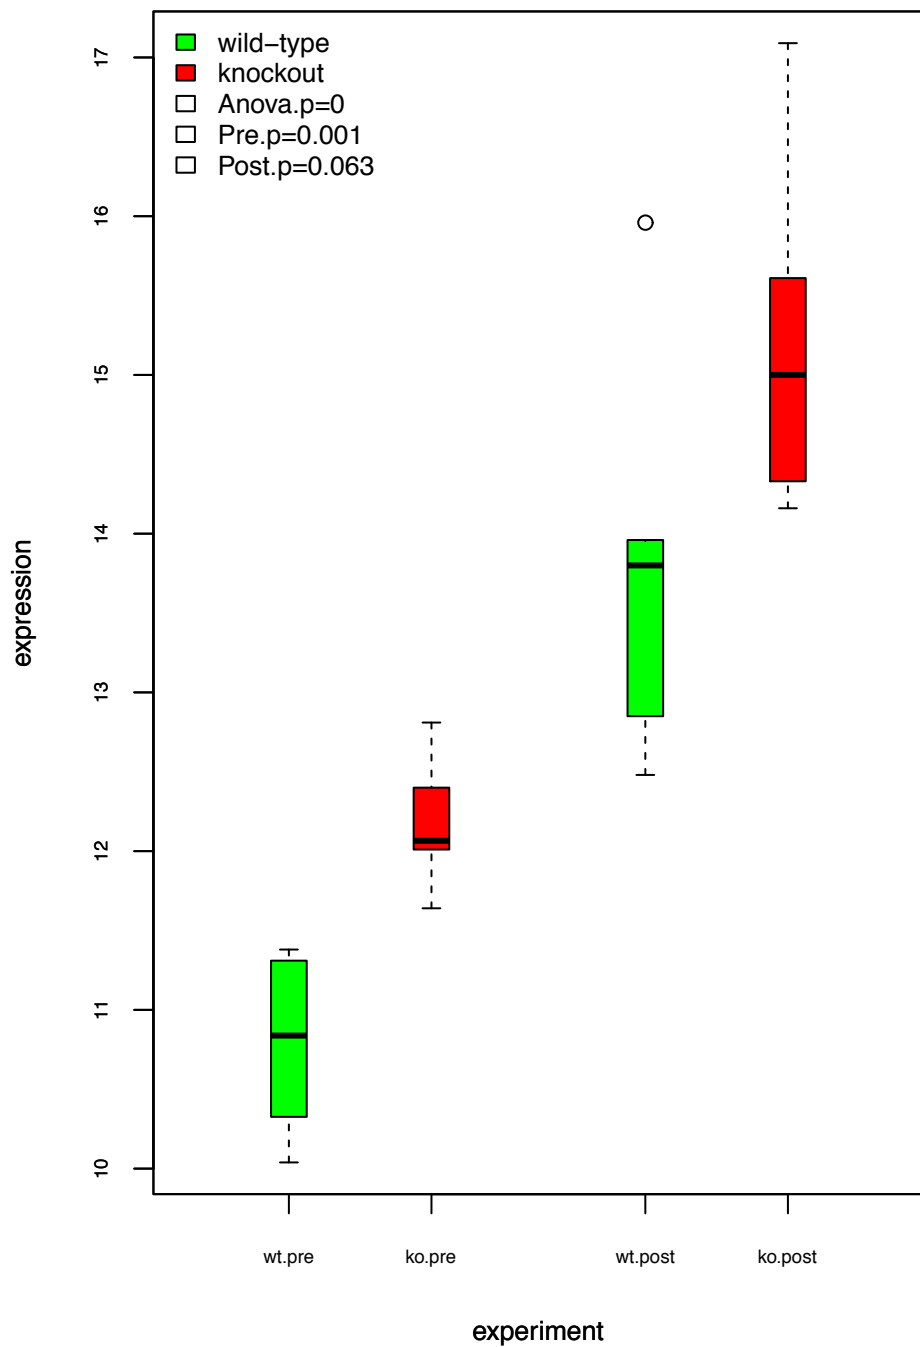

### Ctgf

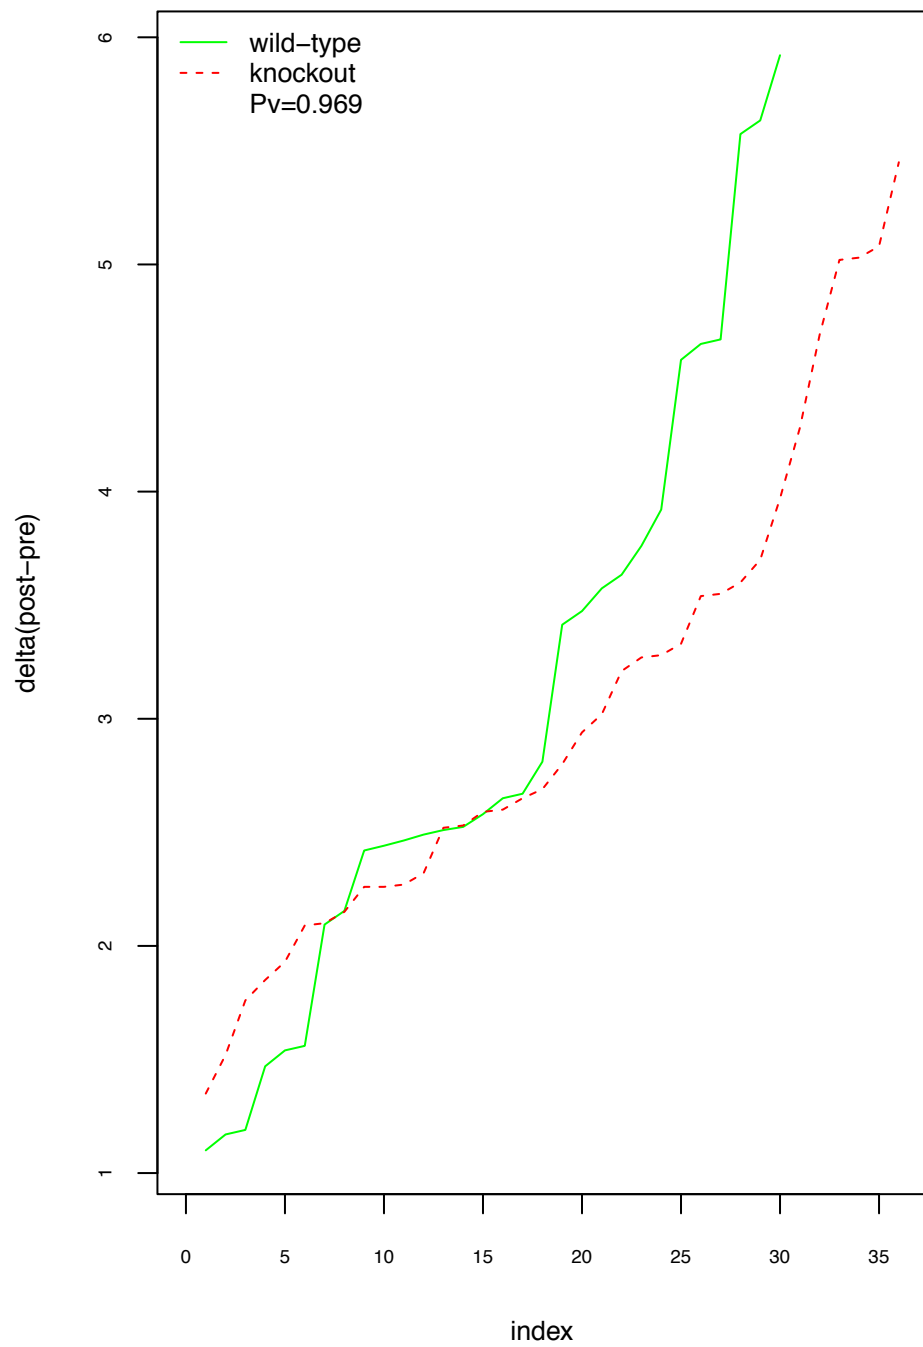

### Col10a1

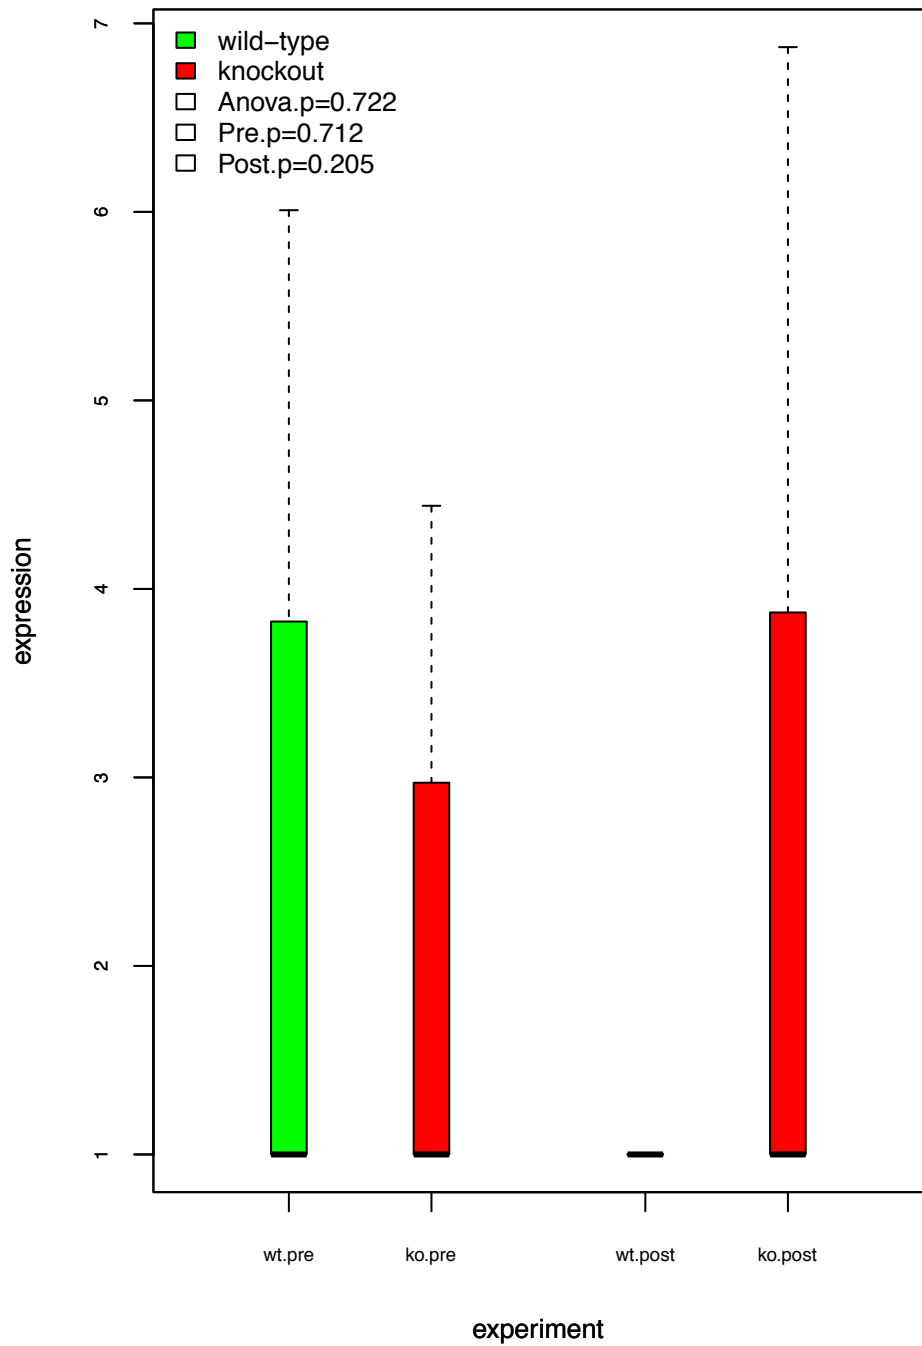

### Col10a1

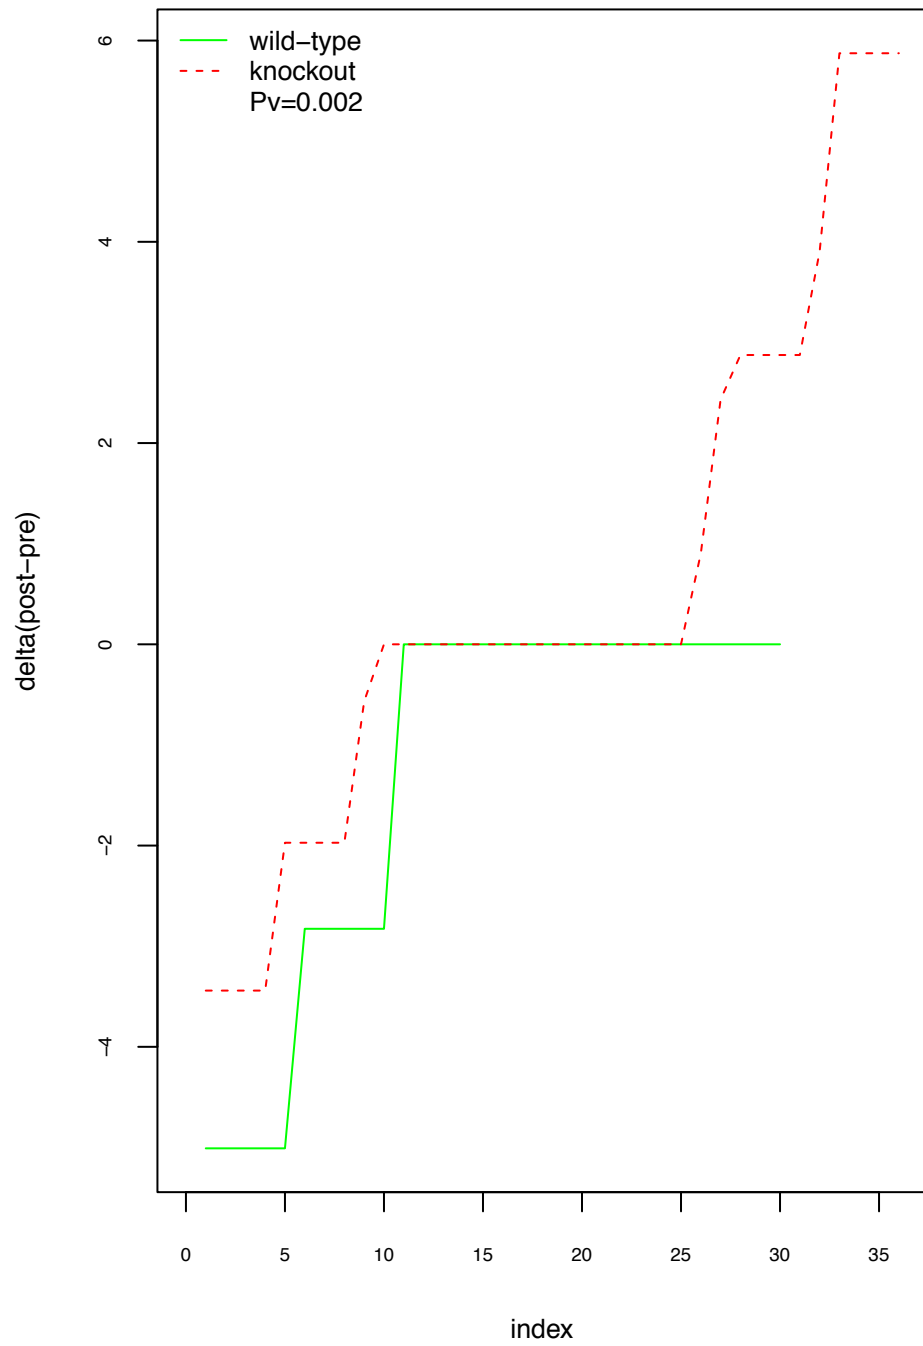

### Col2a1

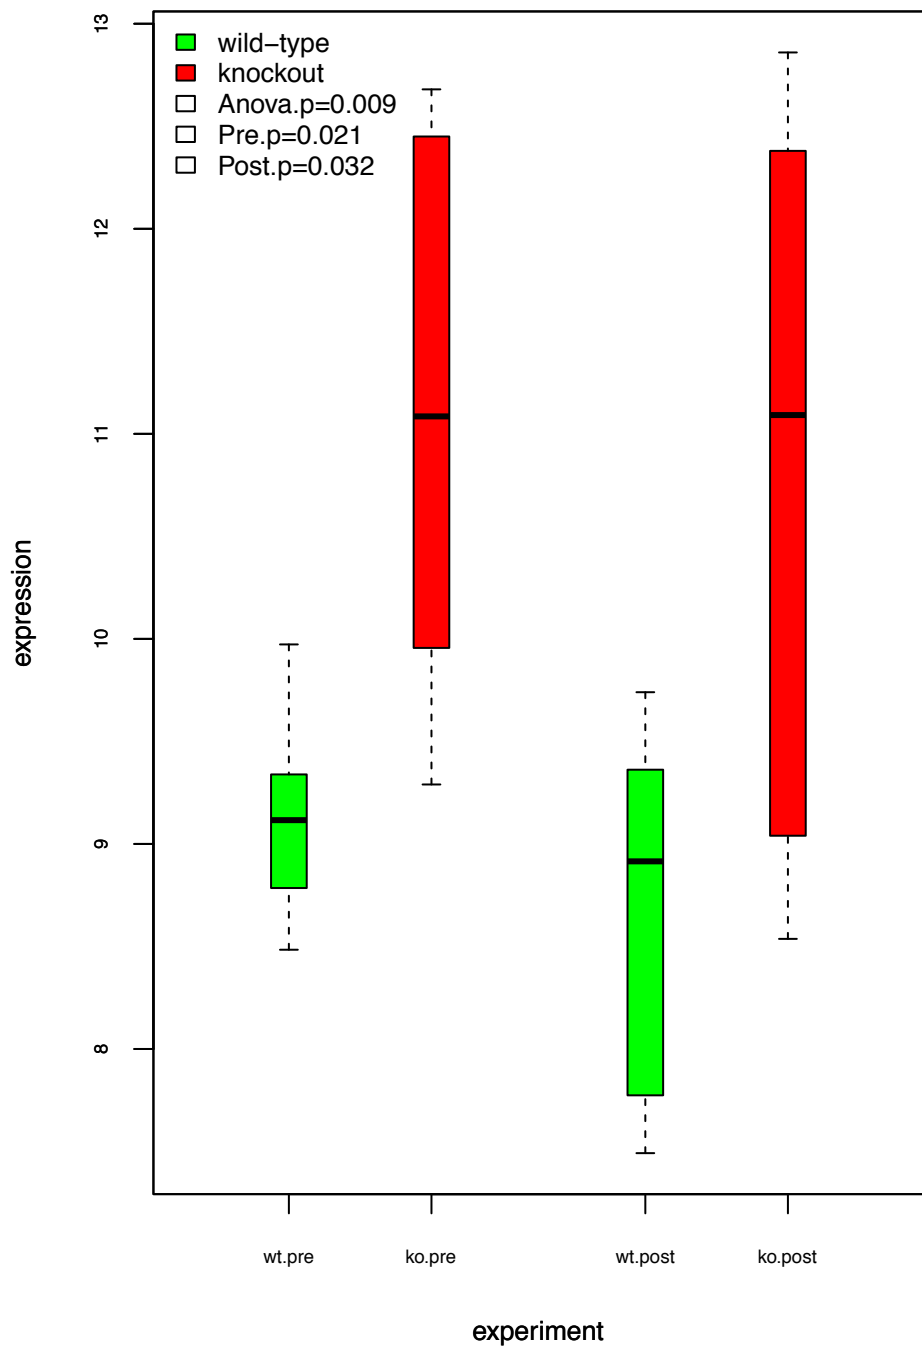

### Col2a1

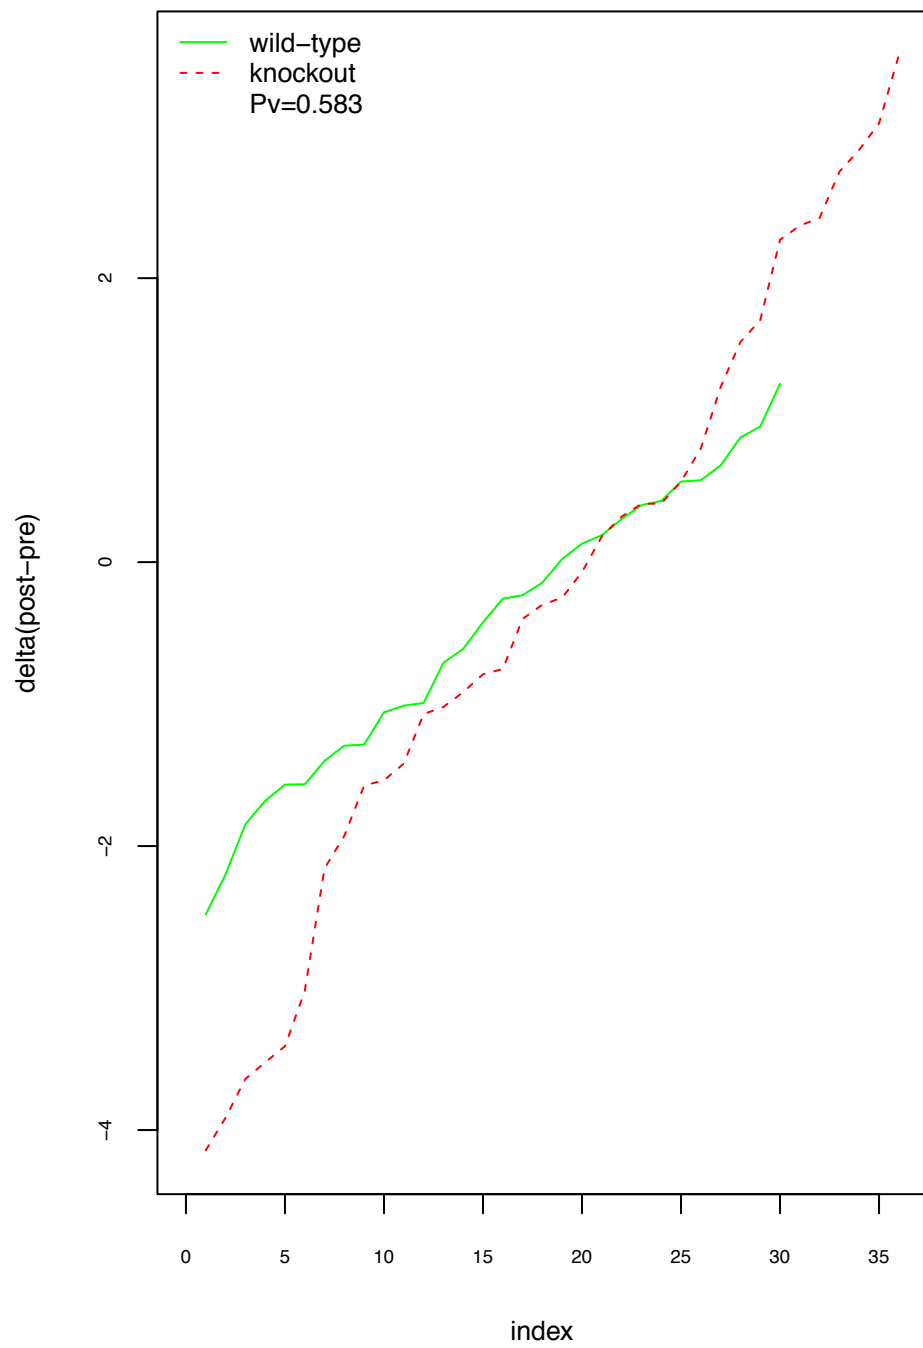

# Col1a1

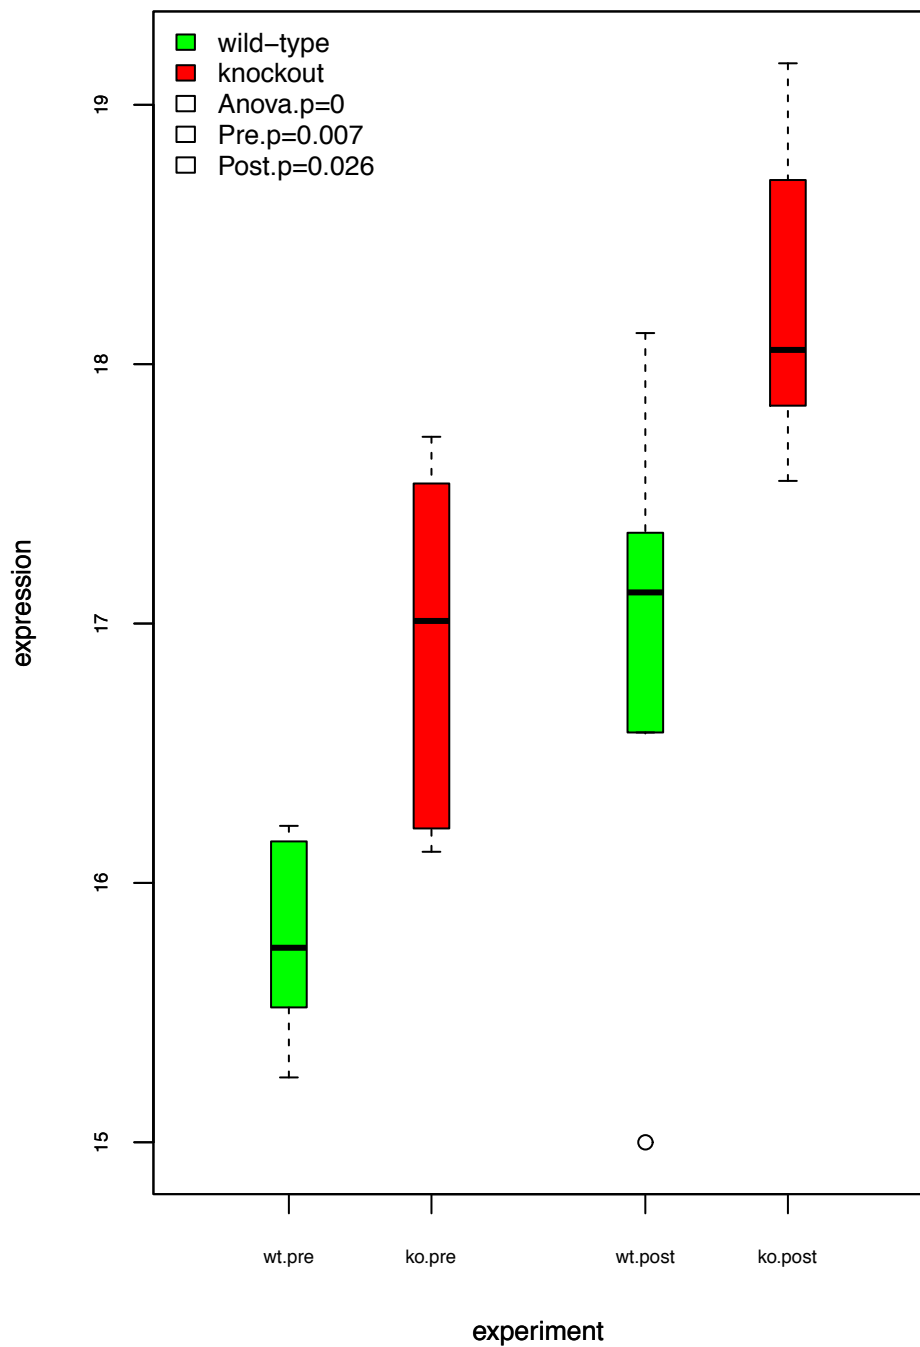

# Col1a1

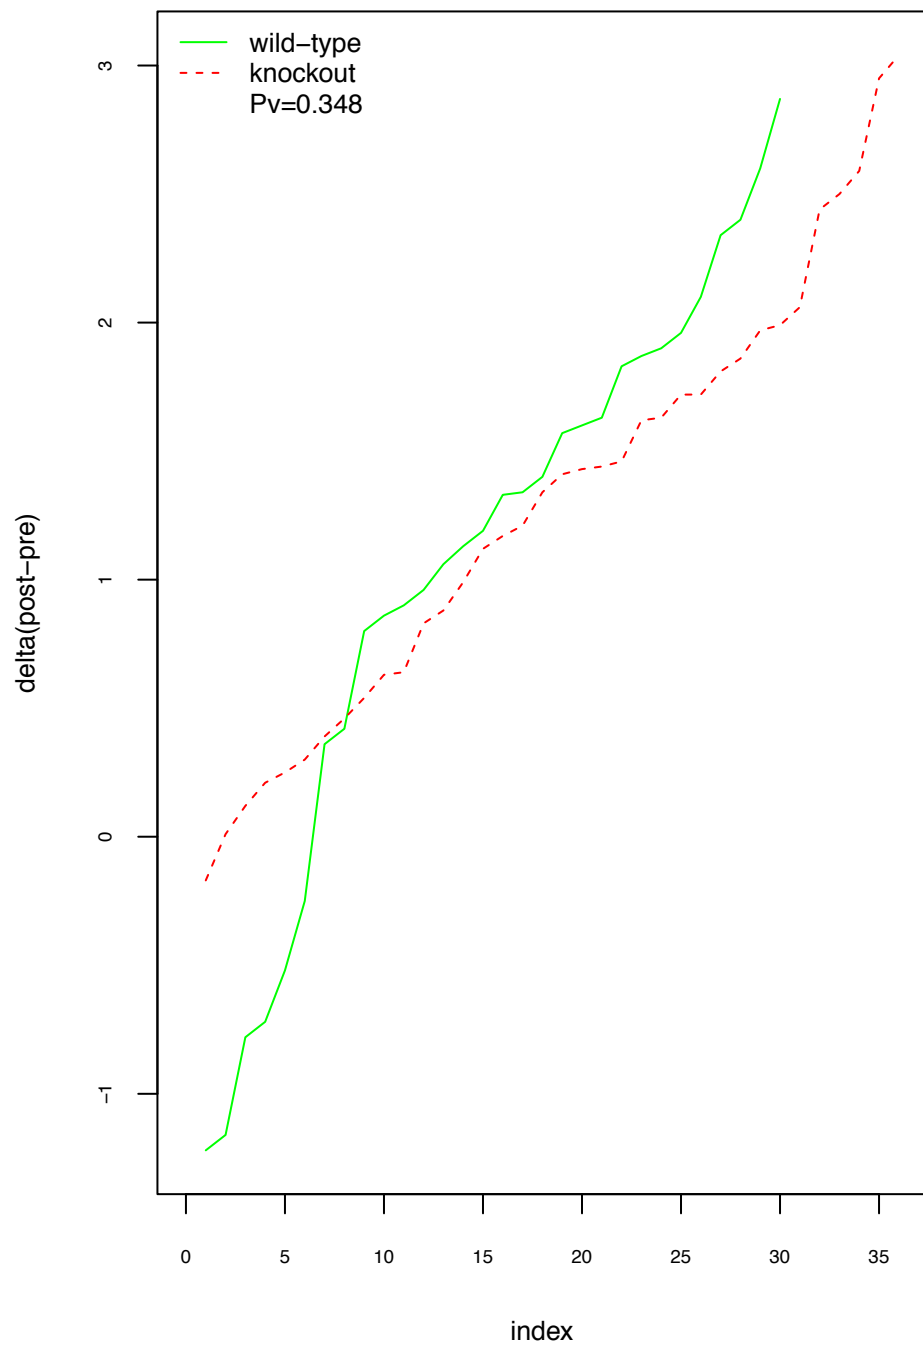

### Chrd

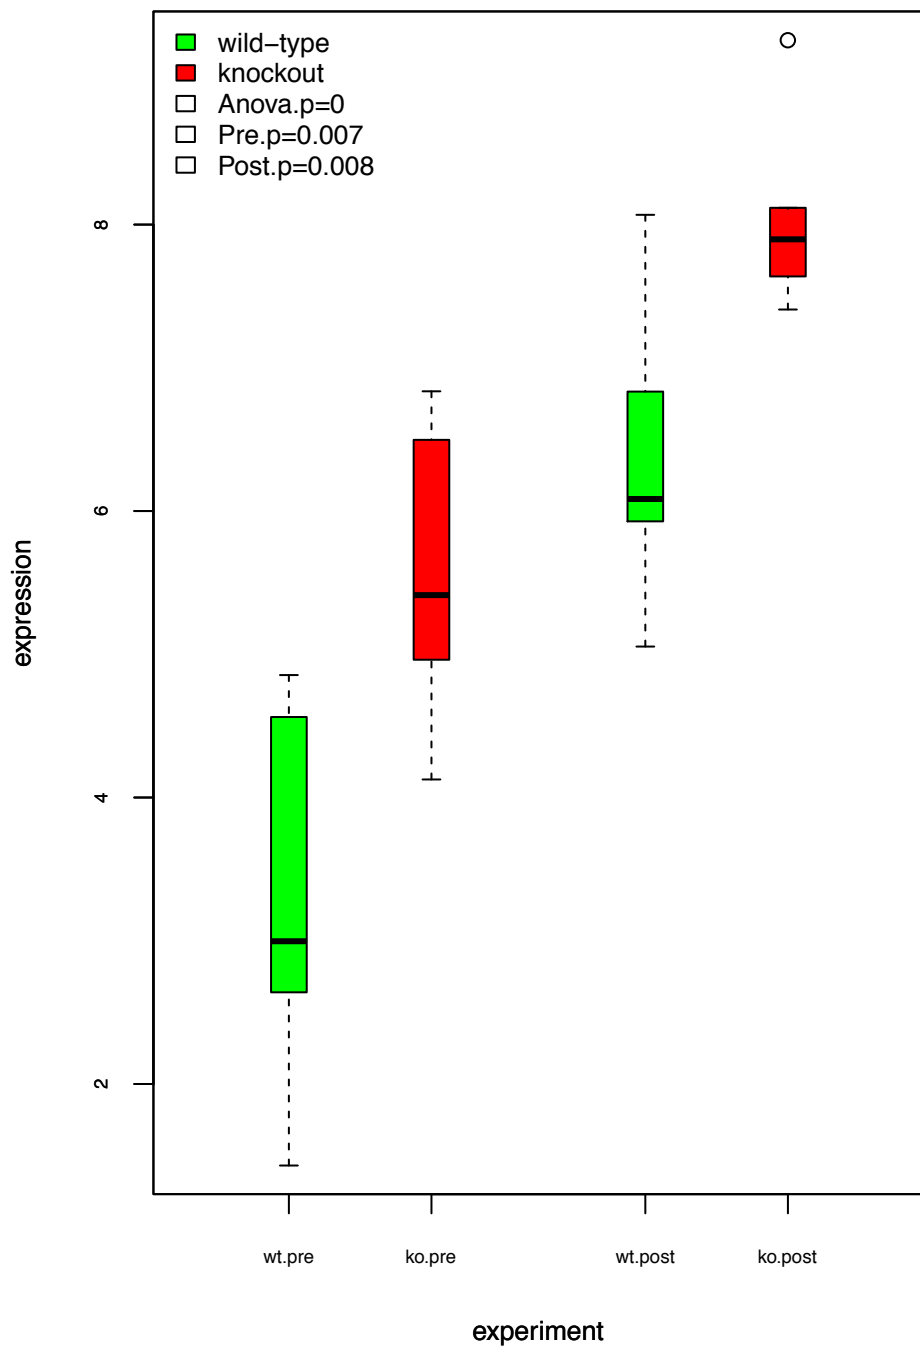

### Chrd

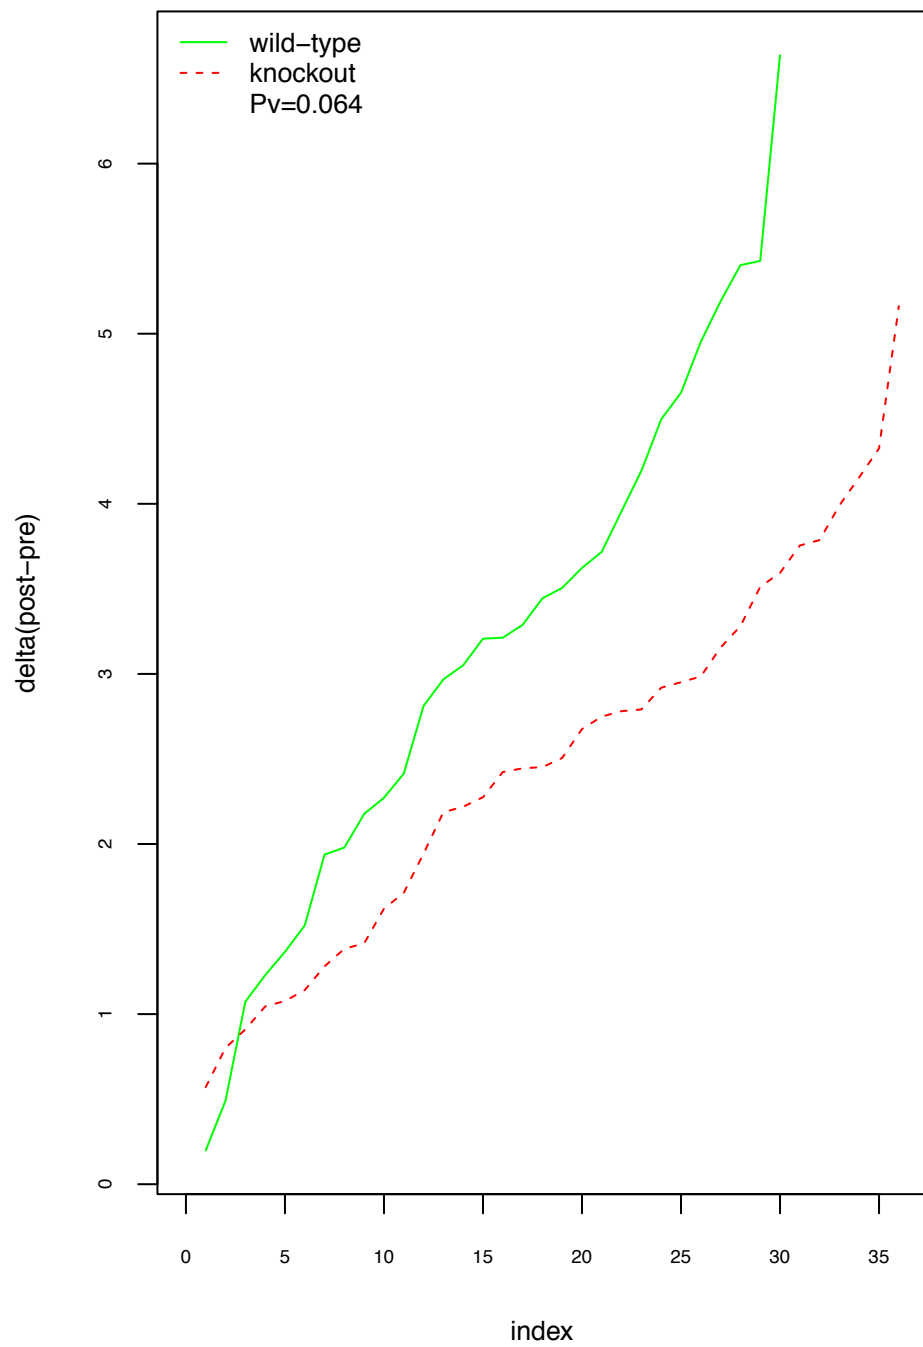

## Cebpa

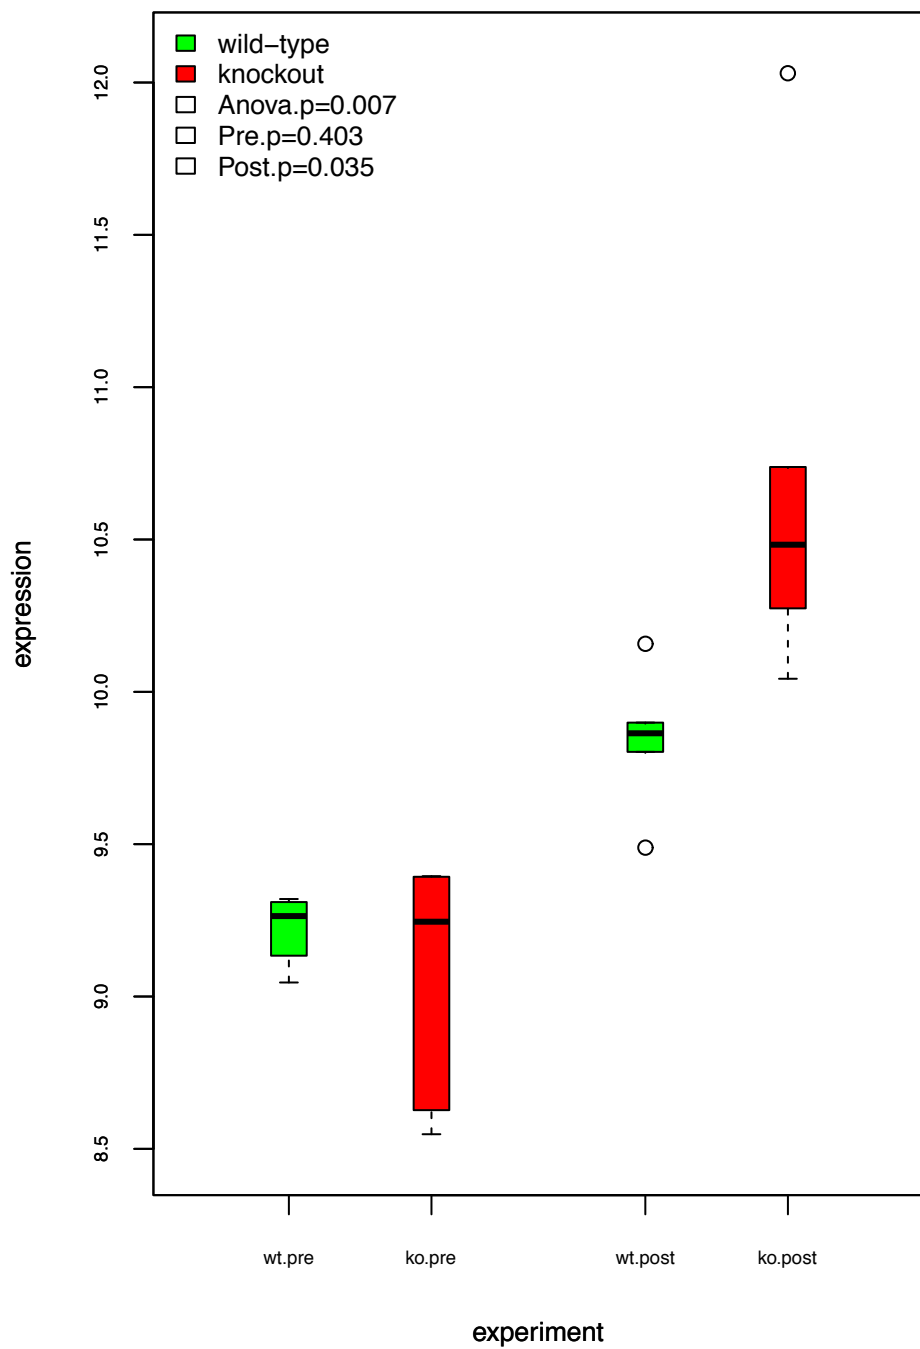

## Cebpa

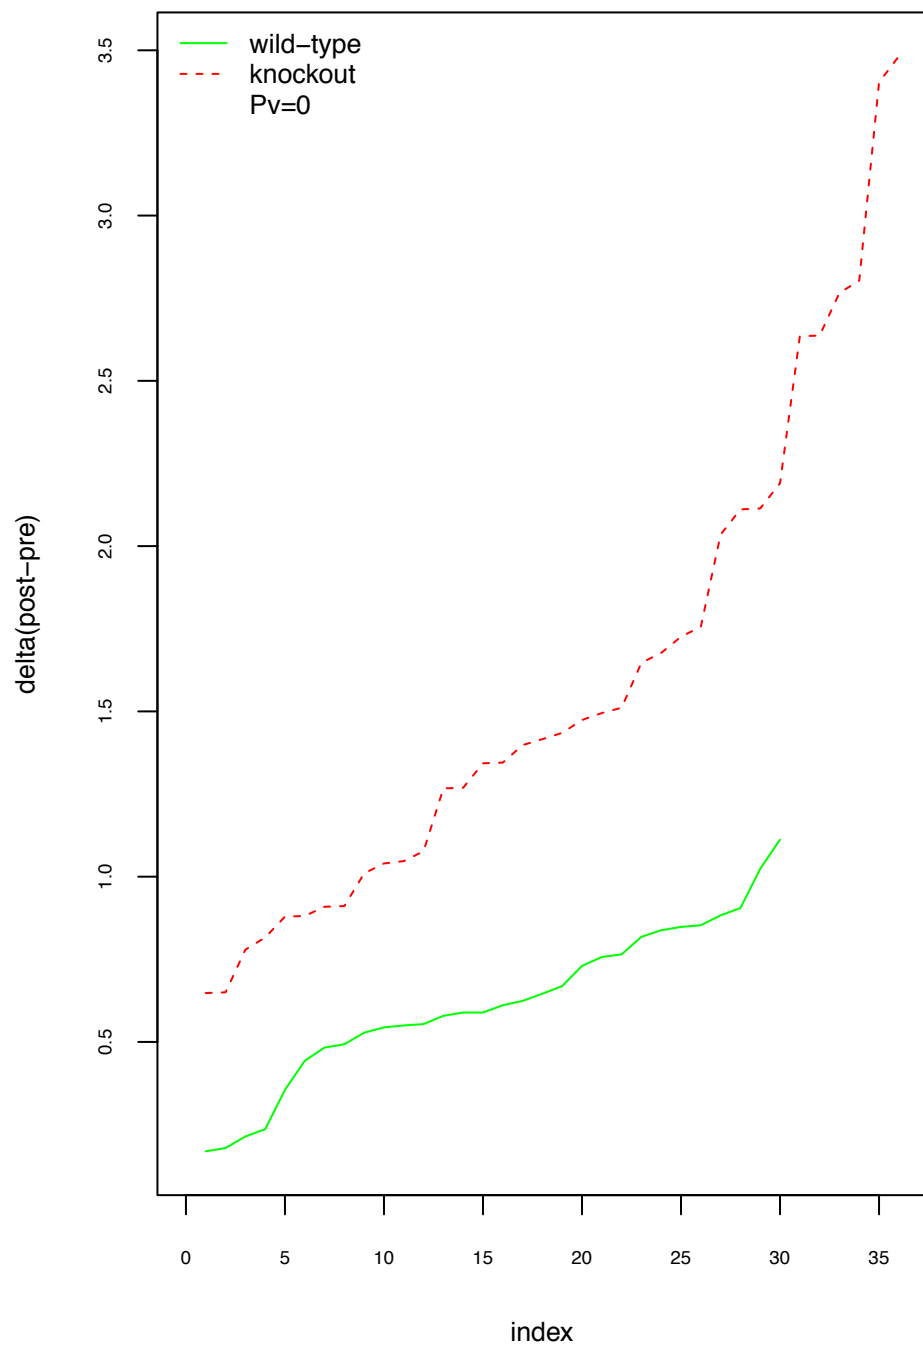

### Ccne1

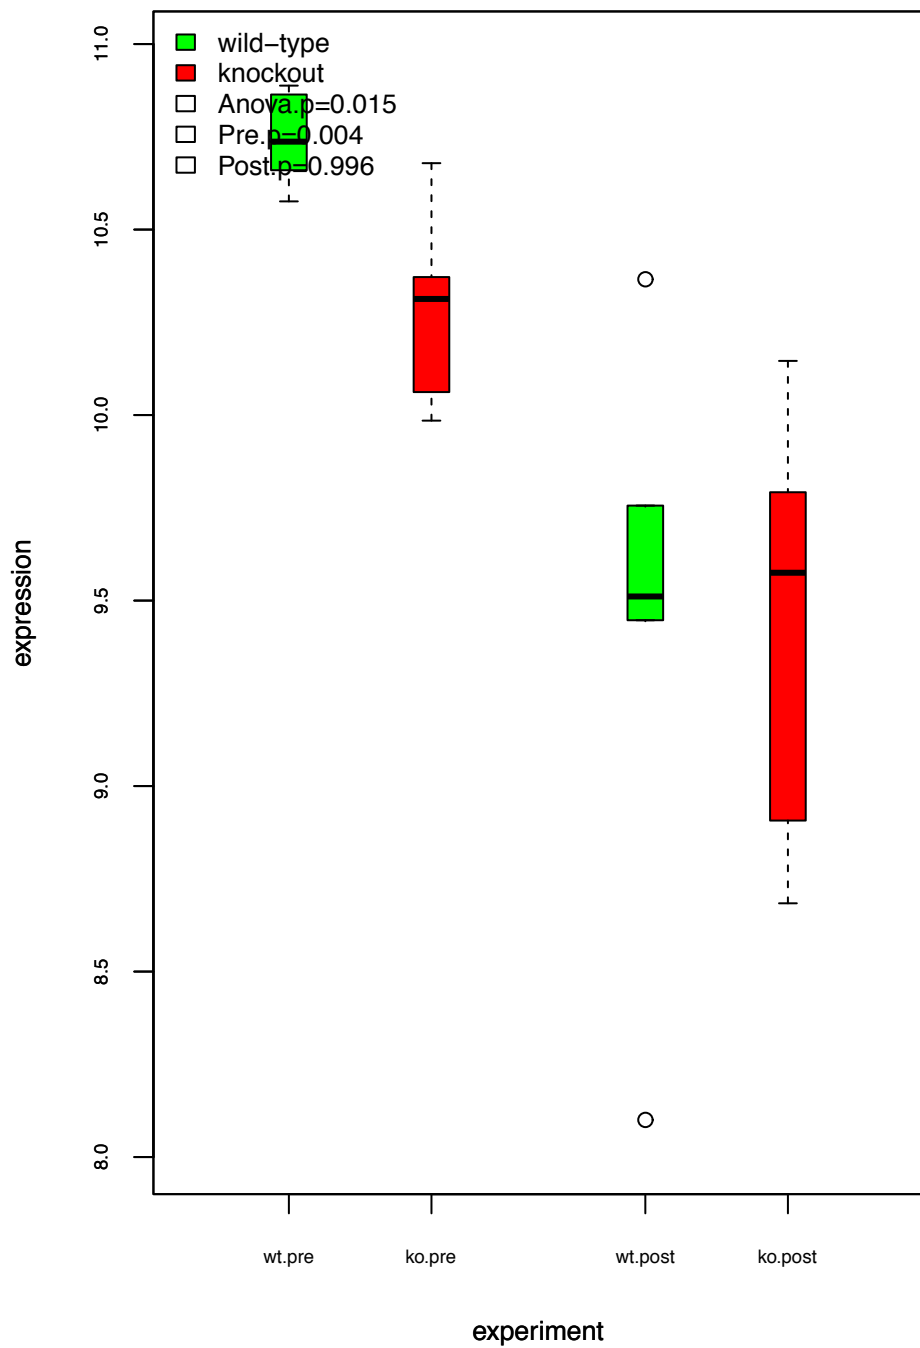

### Ccne1

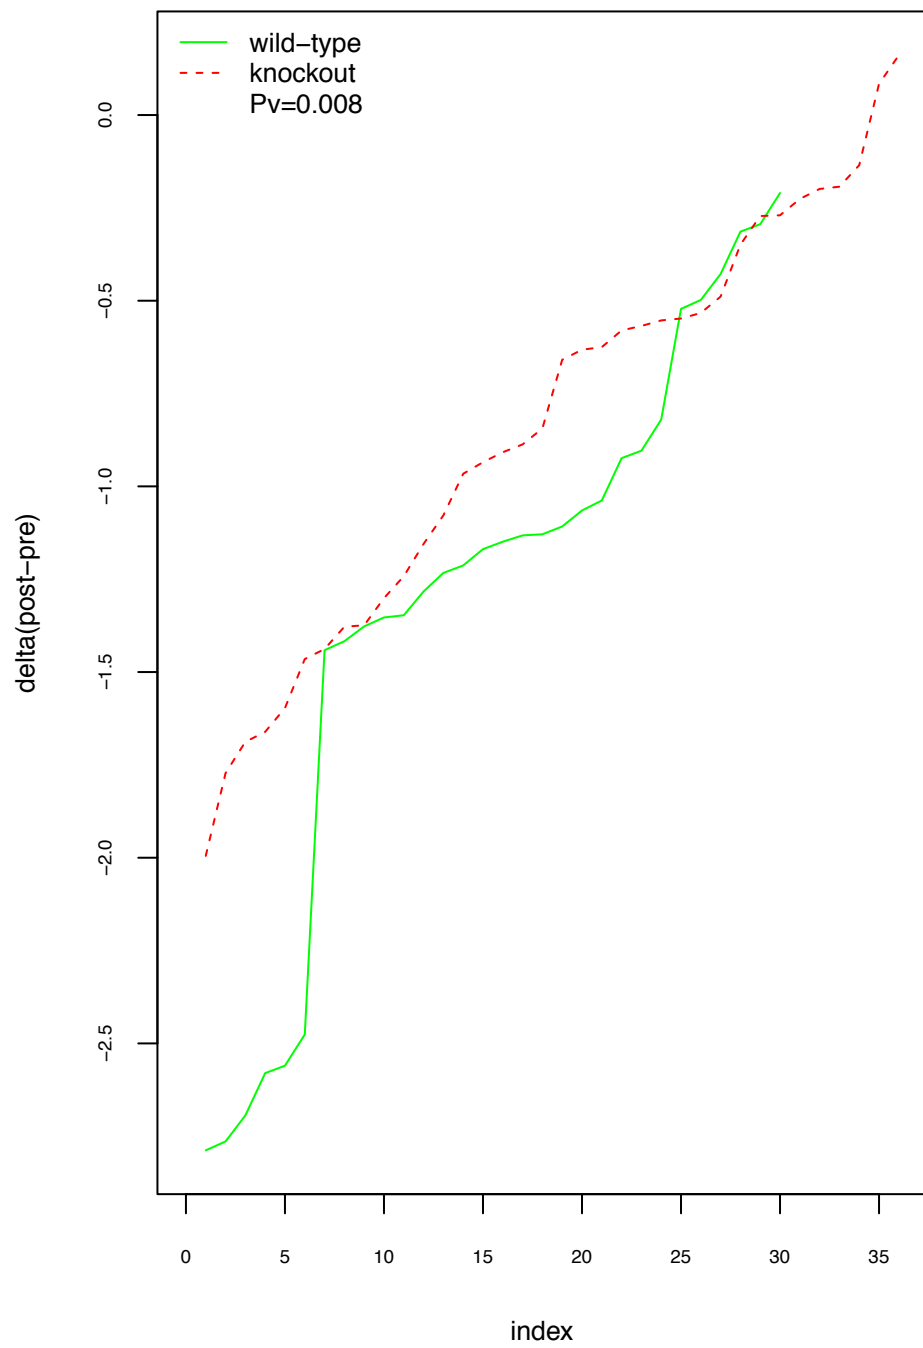



## Ccnd2

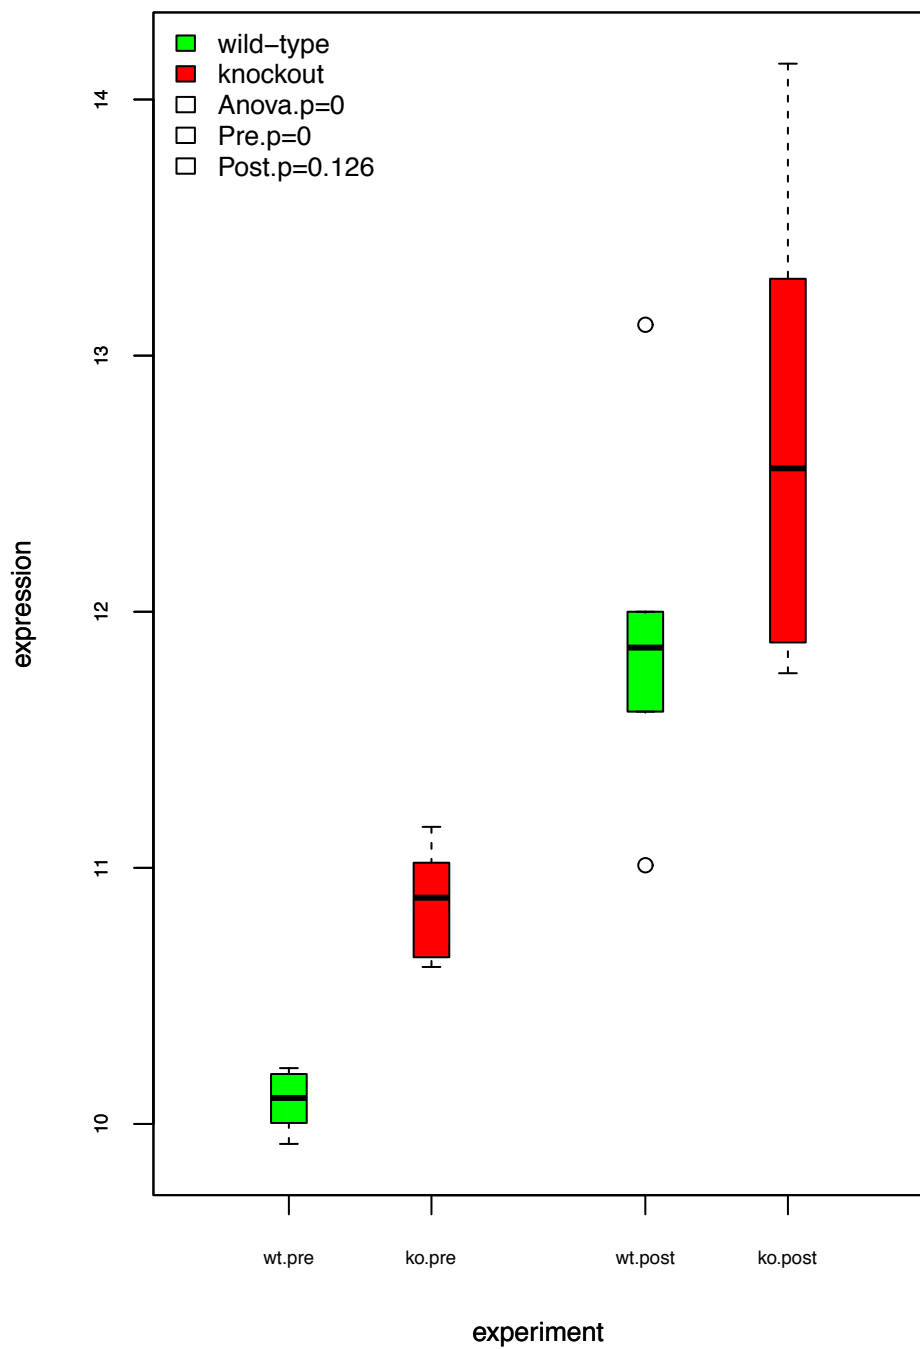

## Ccnd2

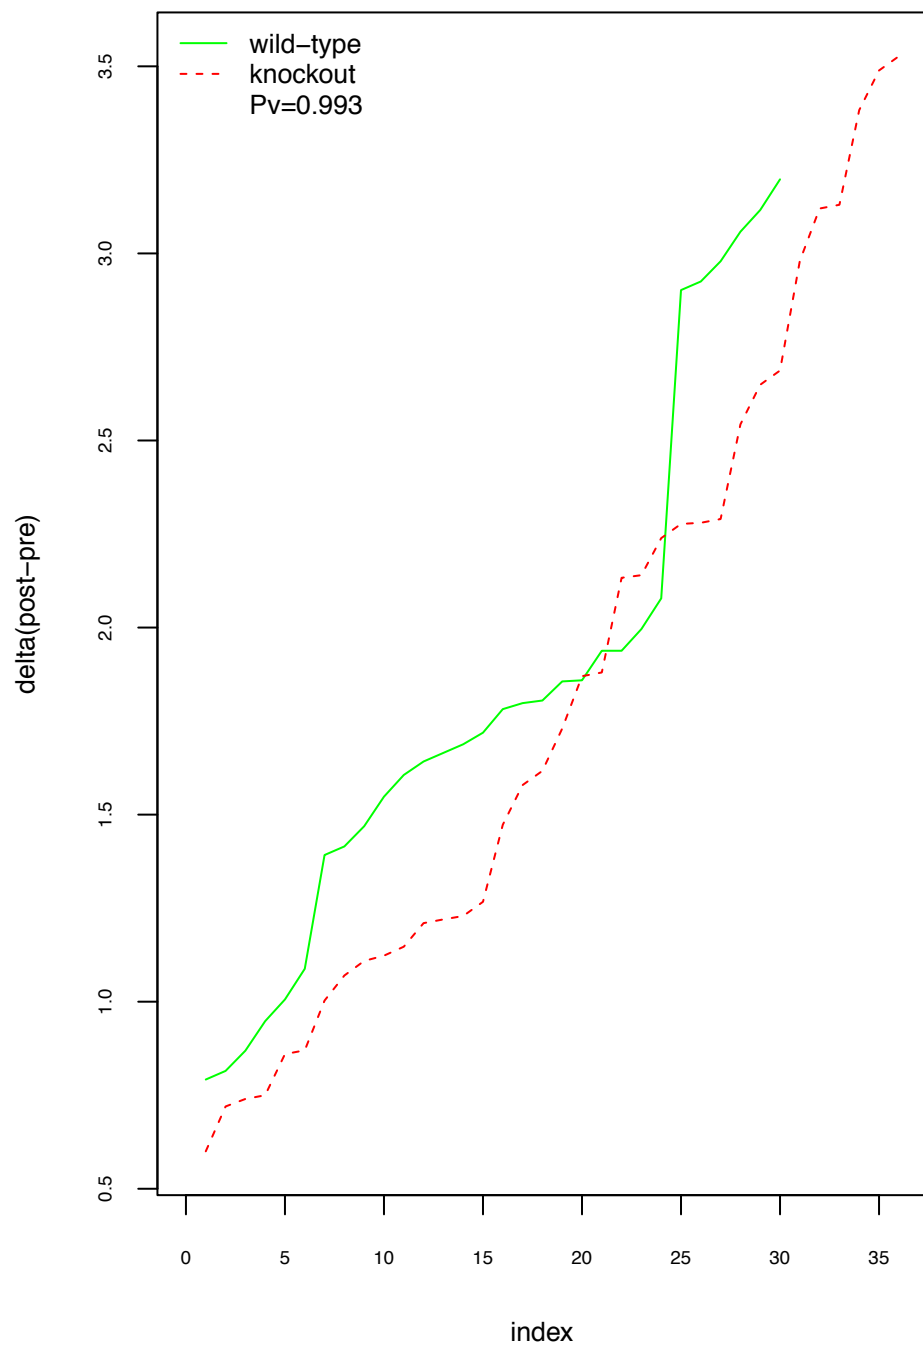

## Ccnd1

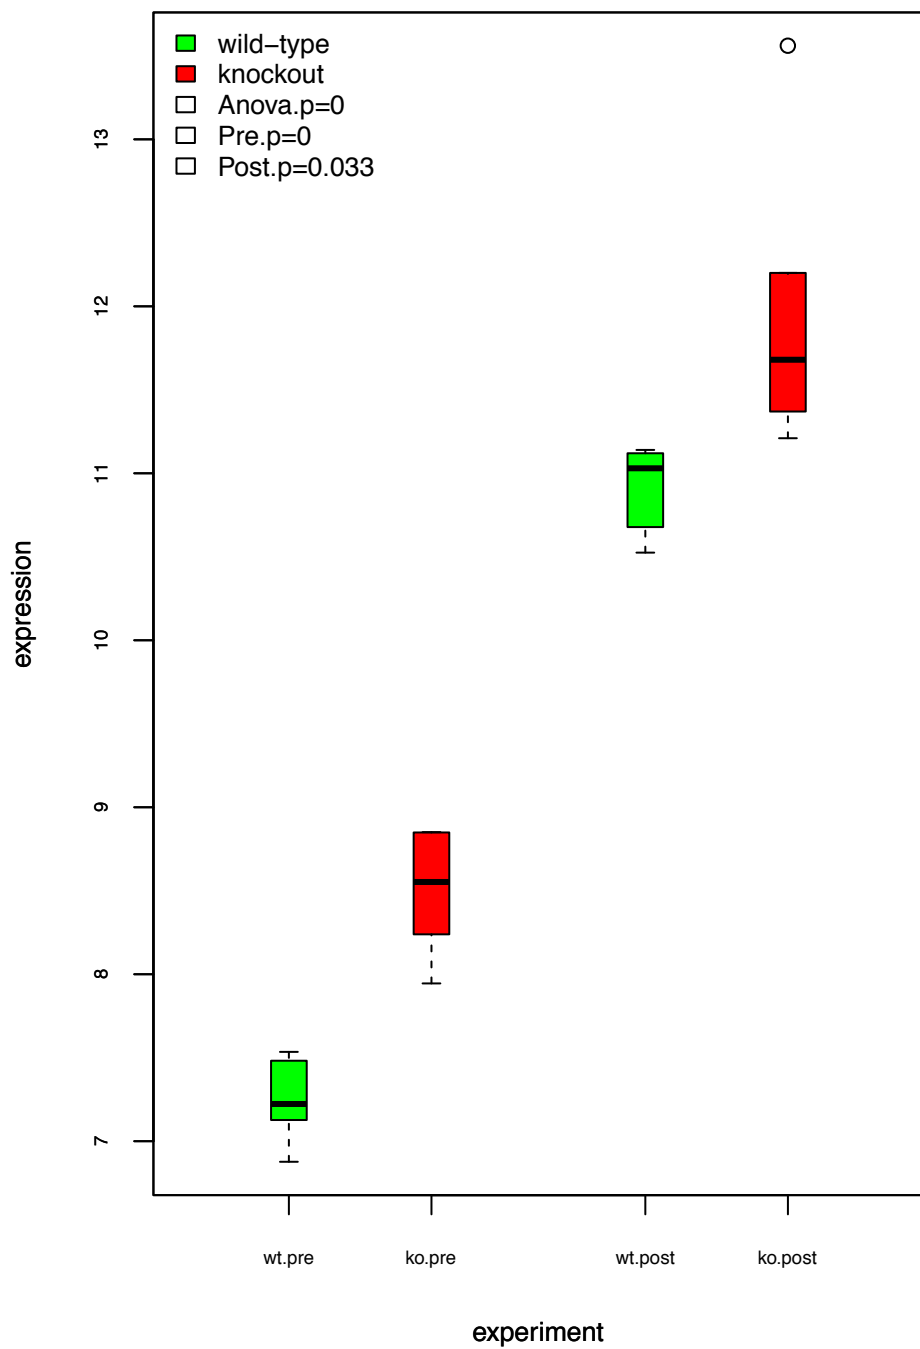

## Ccnd1

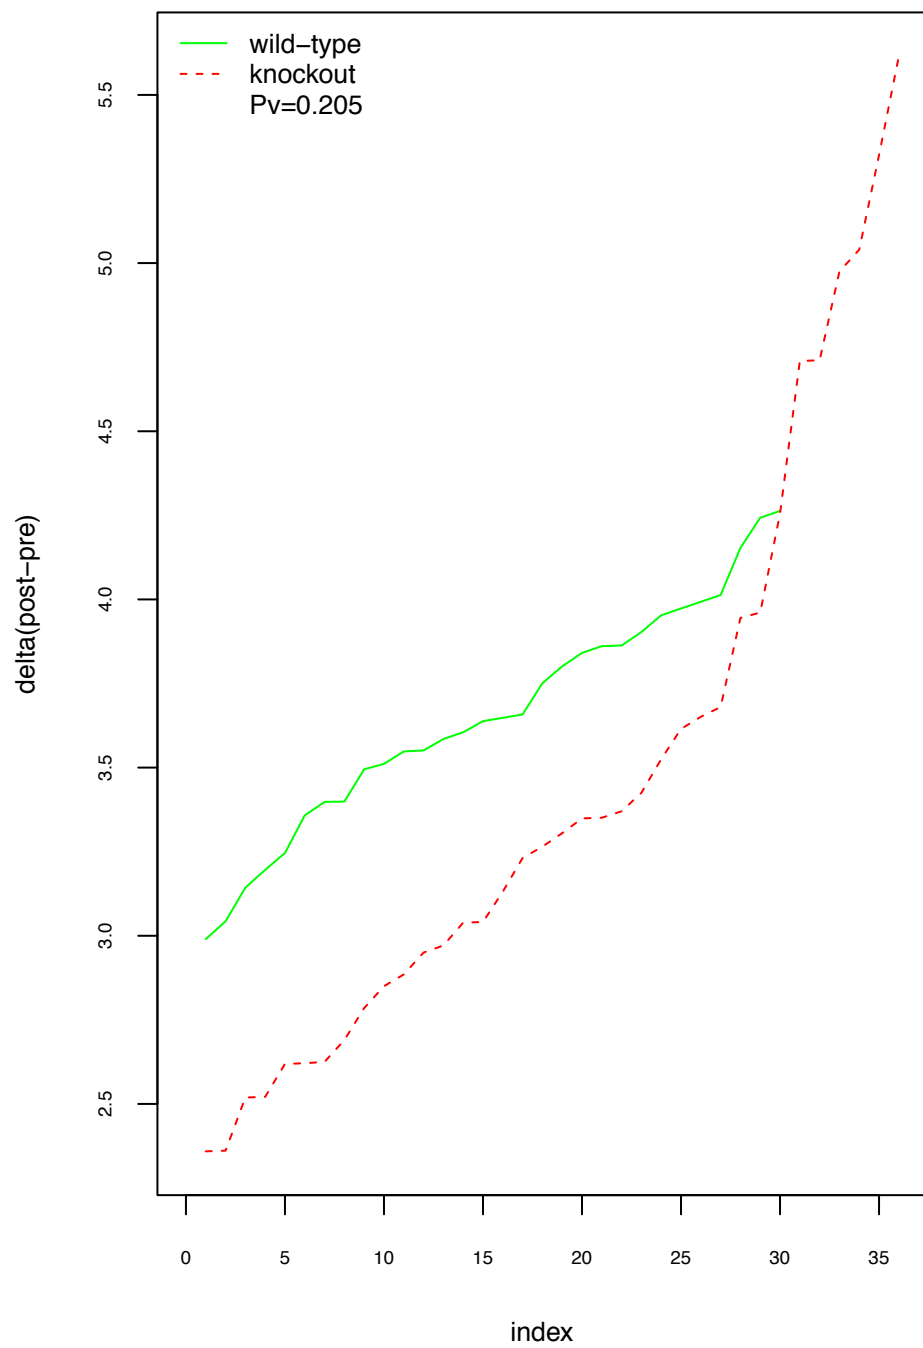

# Ccnb1

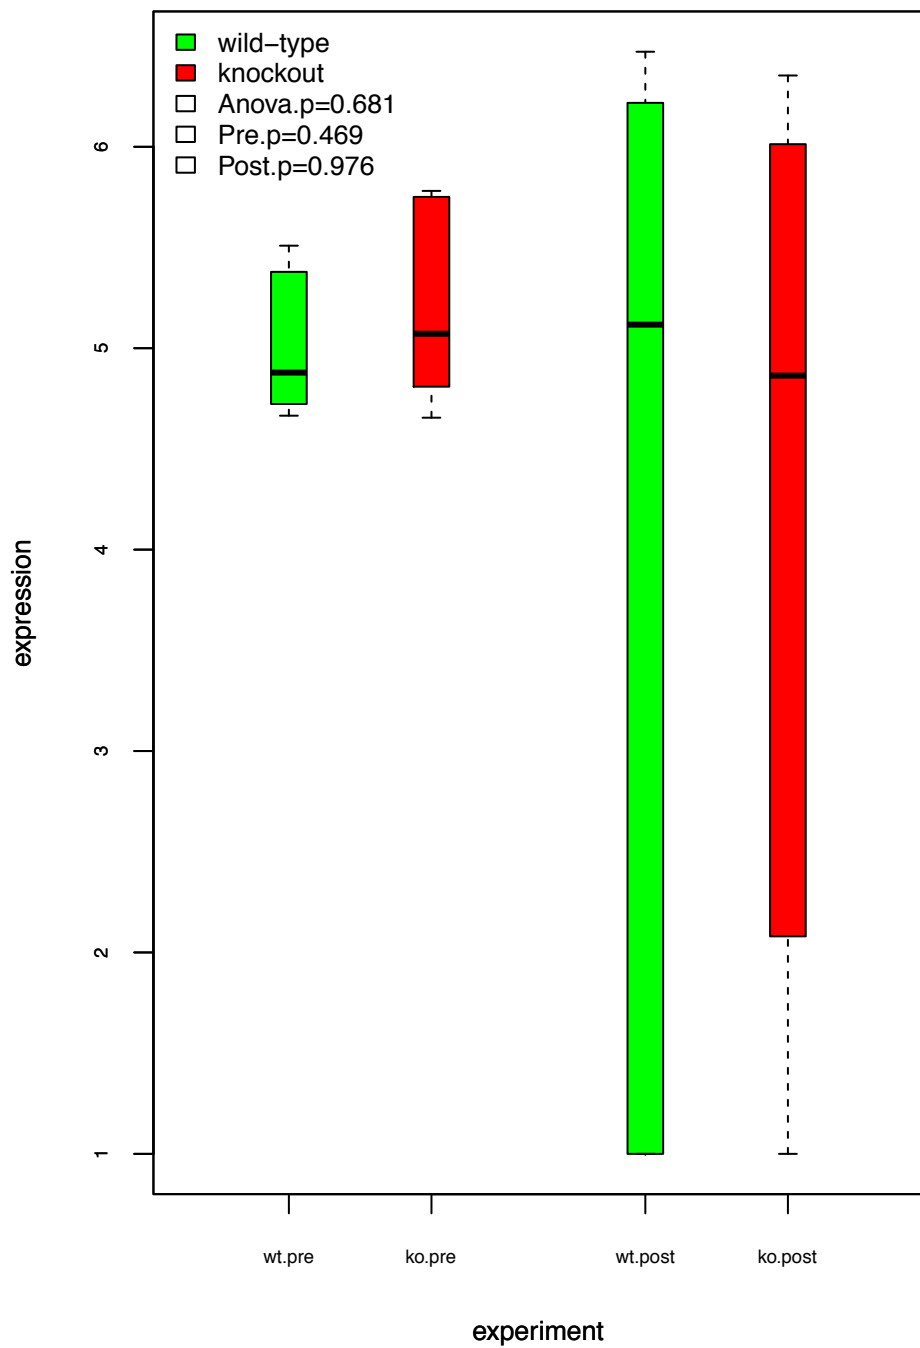

# Ccnb1

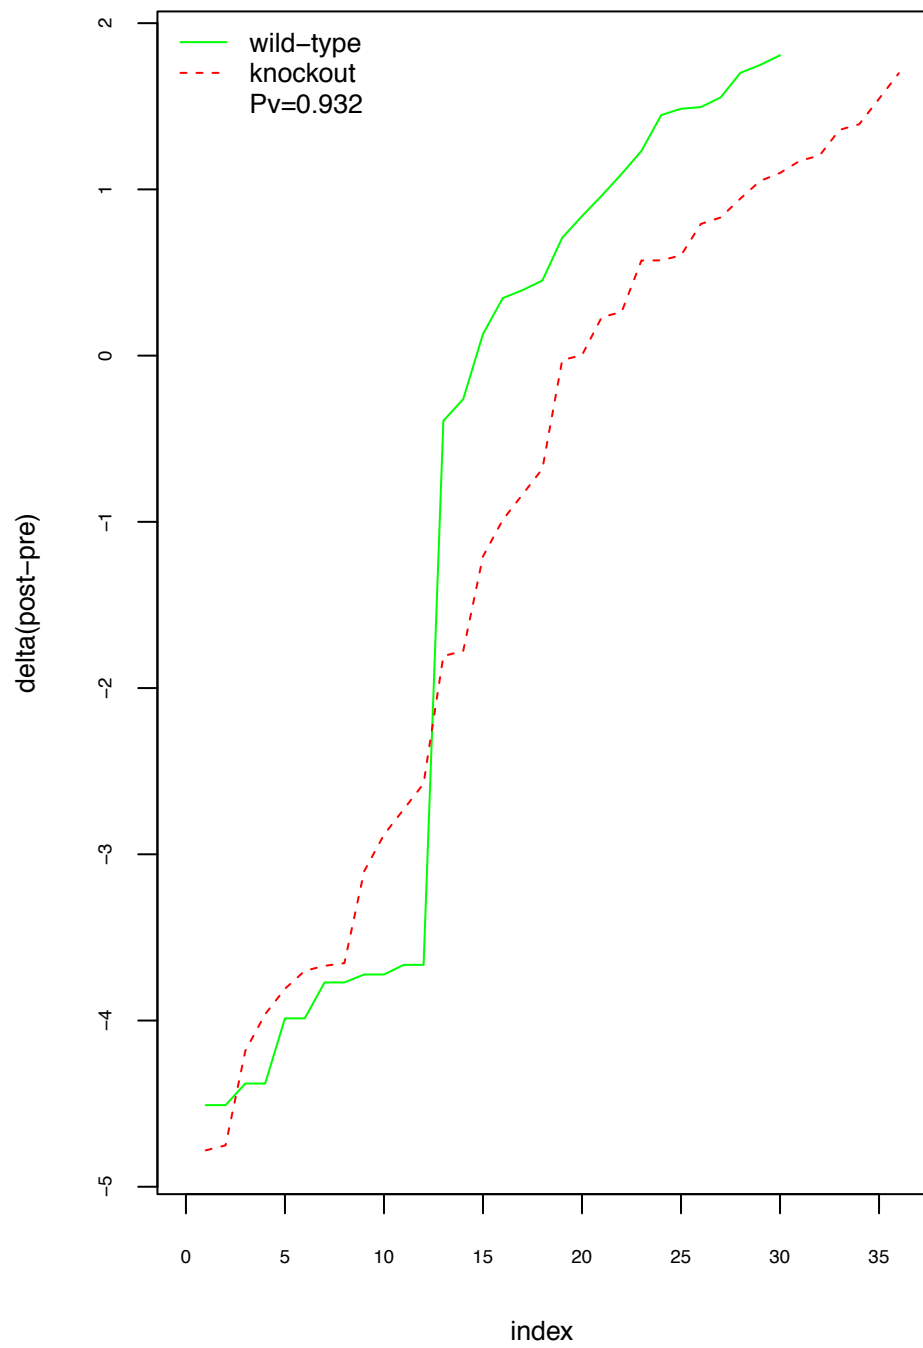

# Dmp1

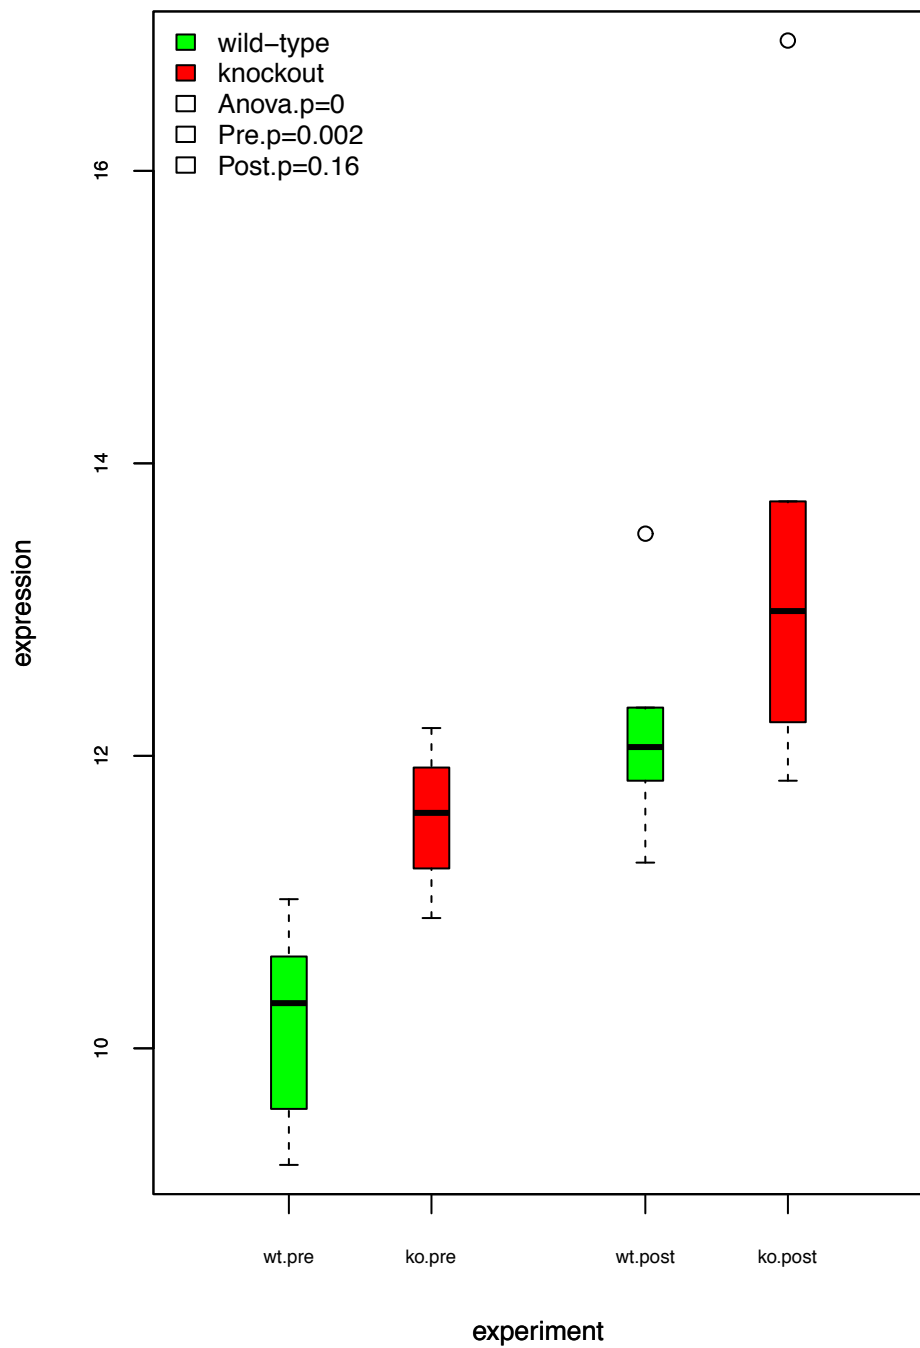

# Dmp1

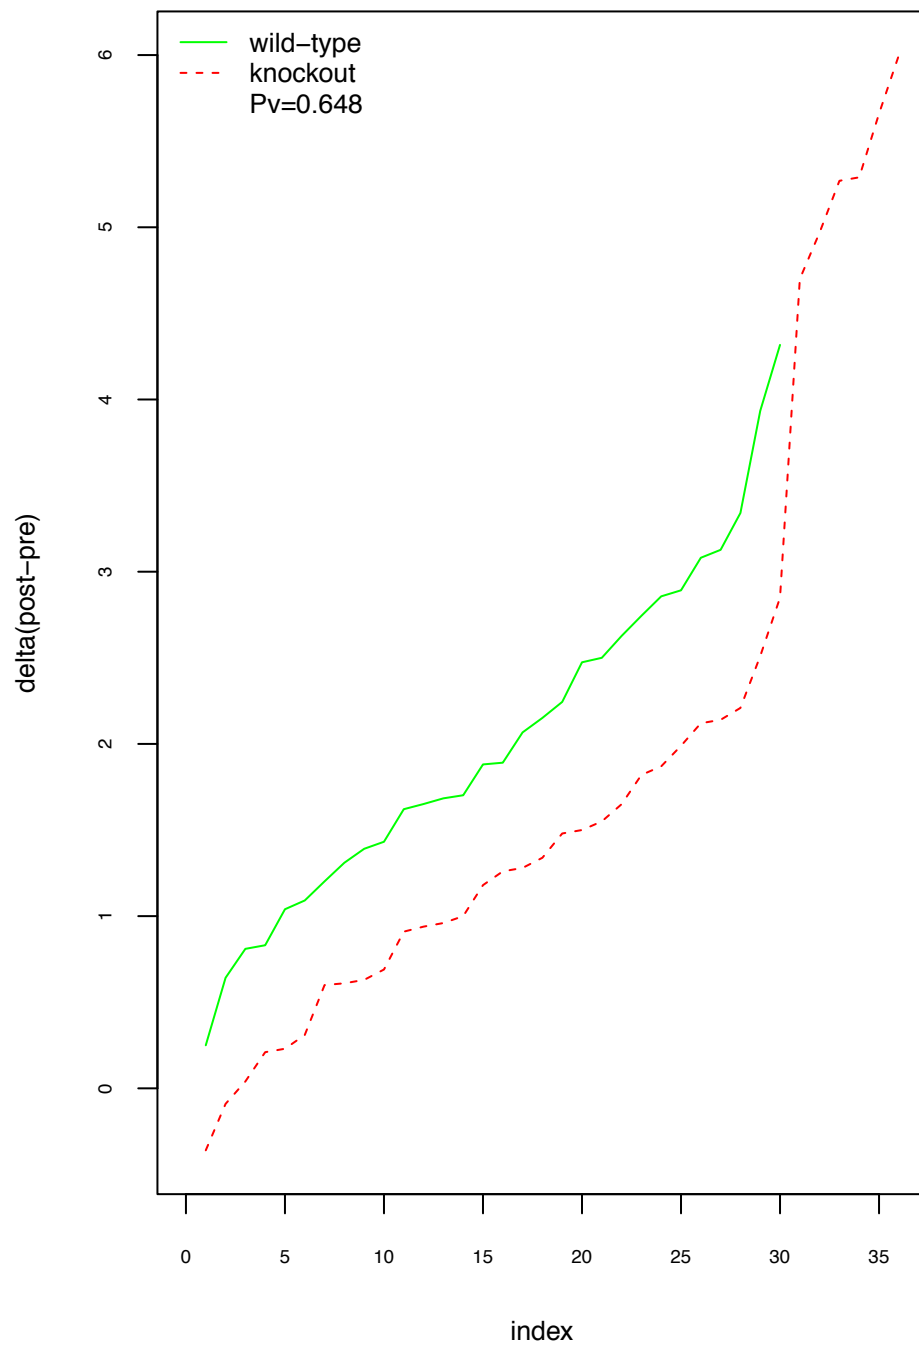

### Dlx5

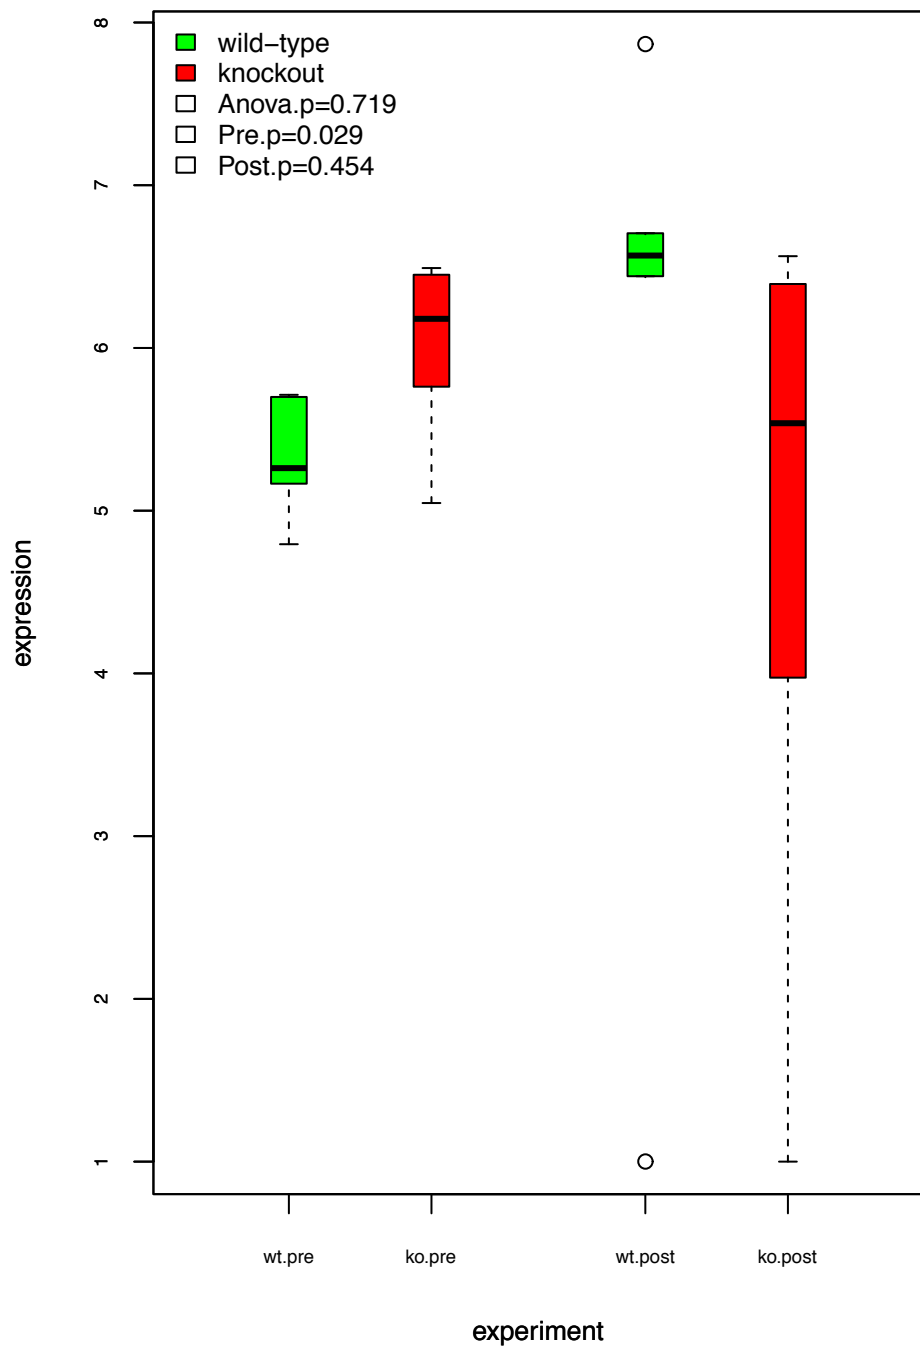

### Dlx5

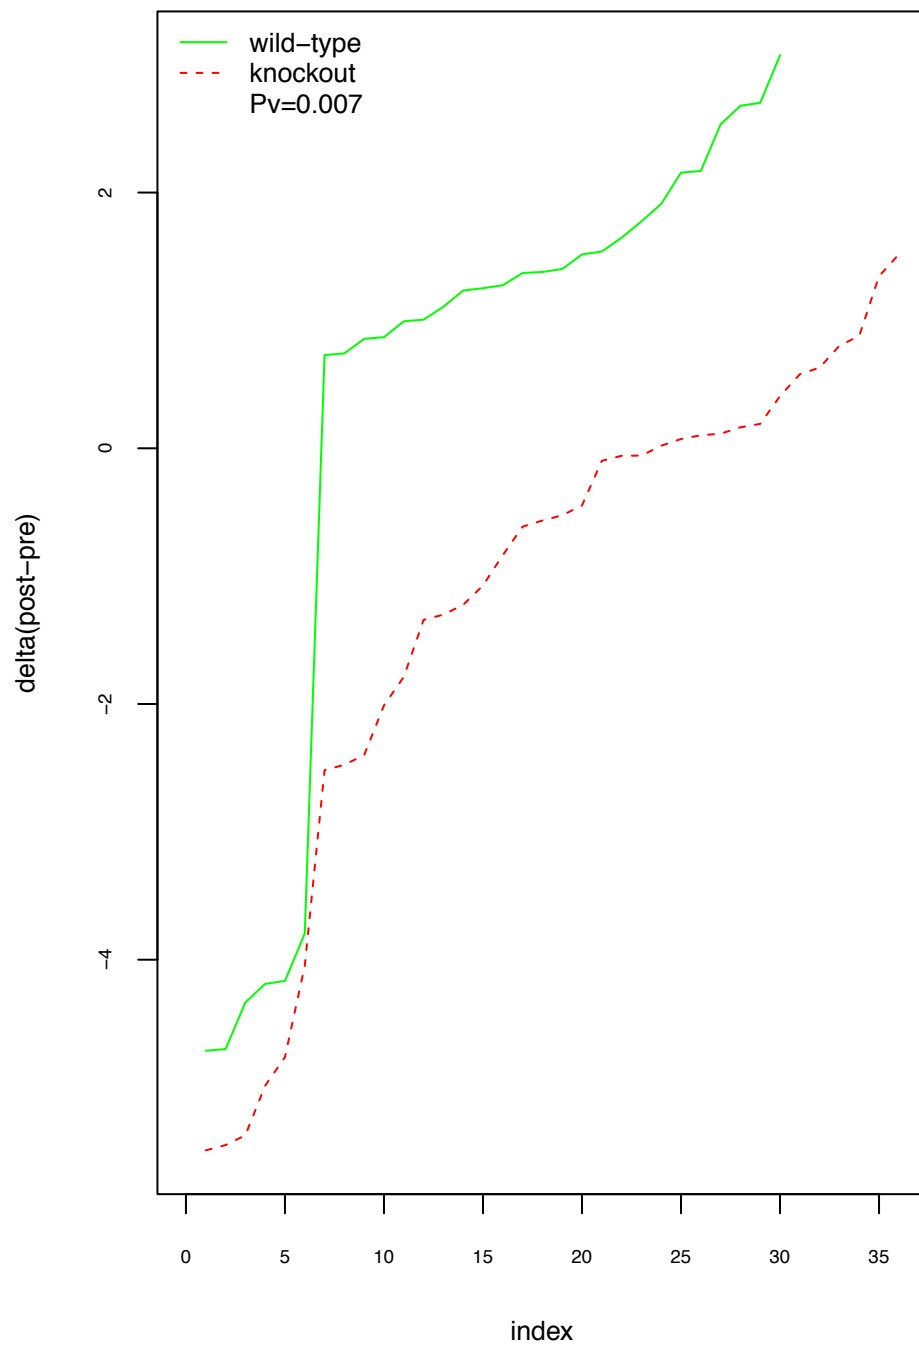

## Dlx2

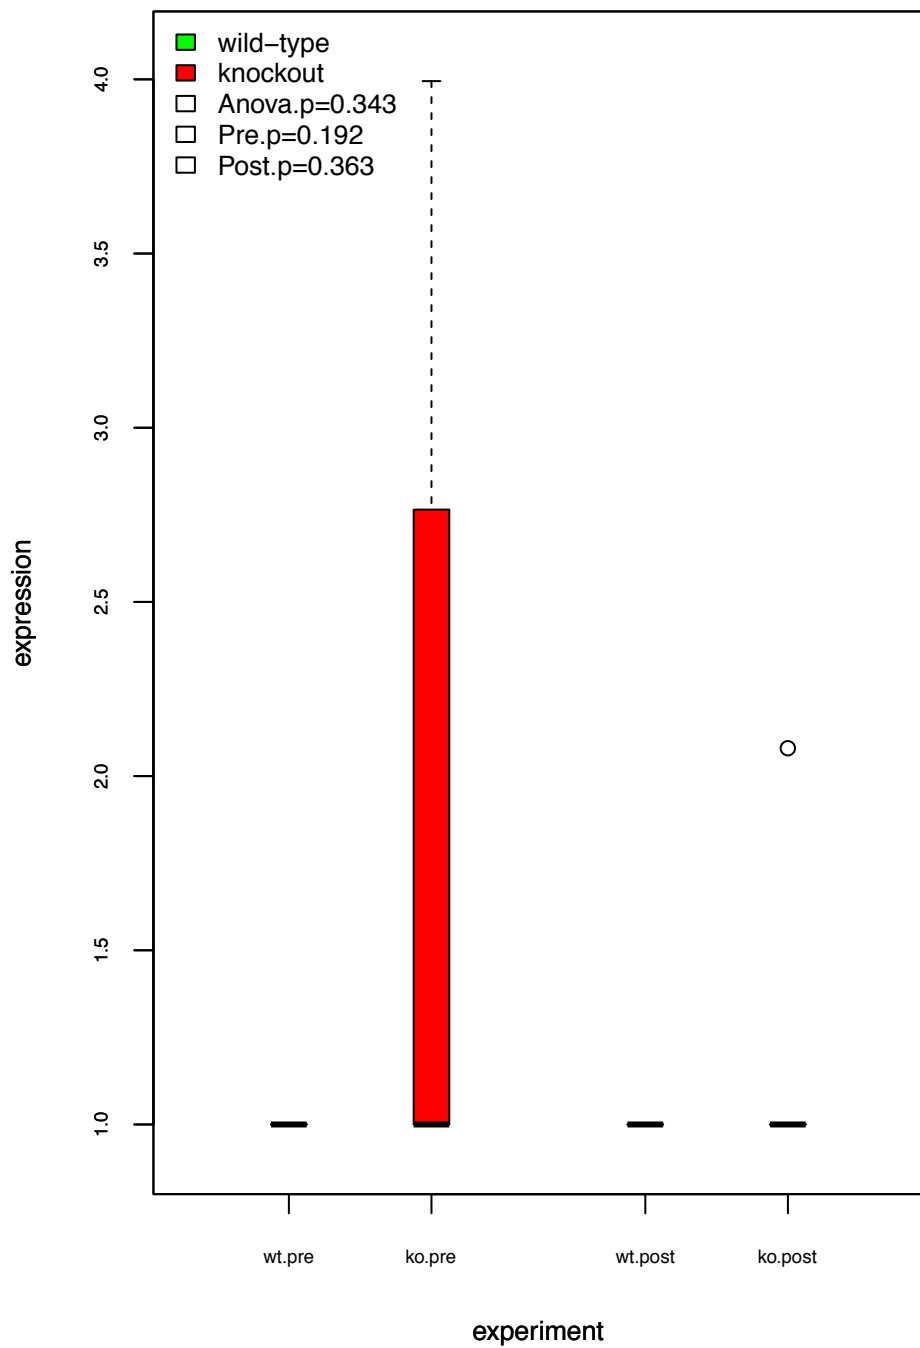

## Dlx2

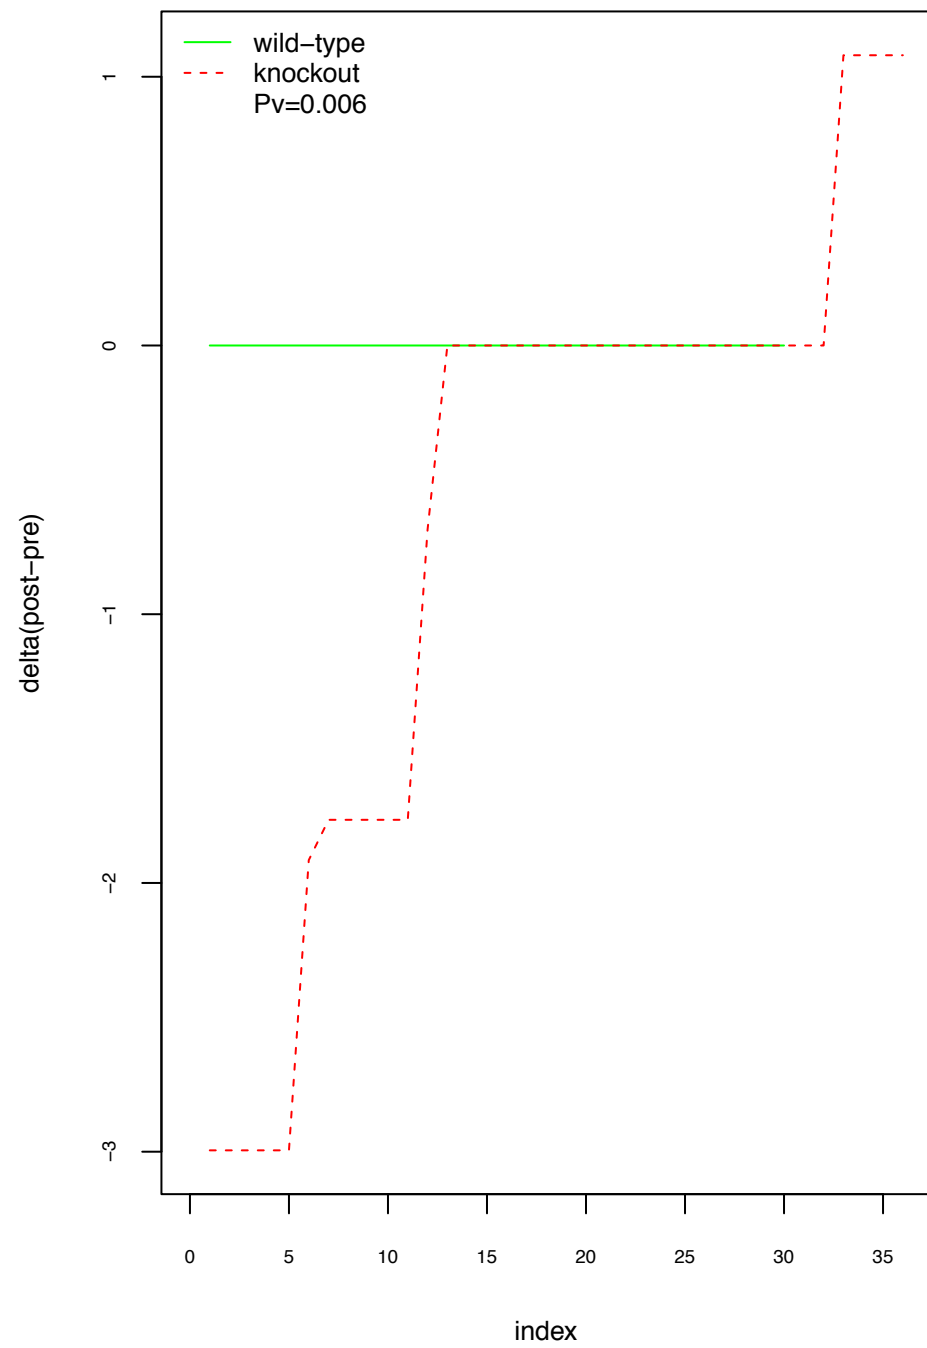

# DII1

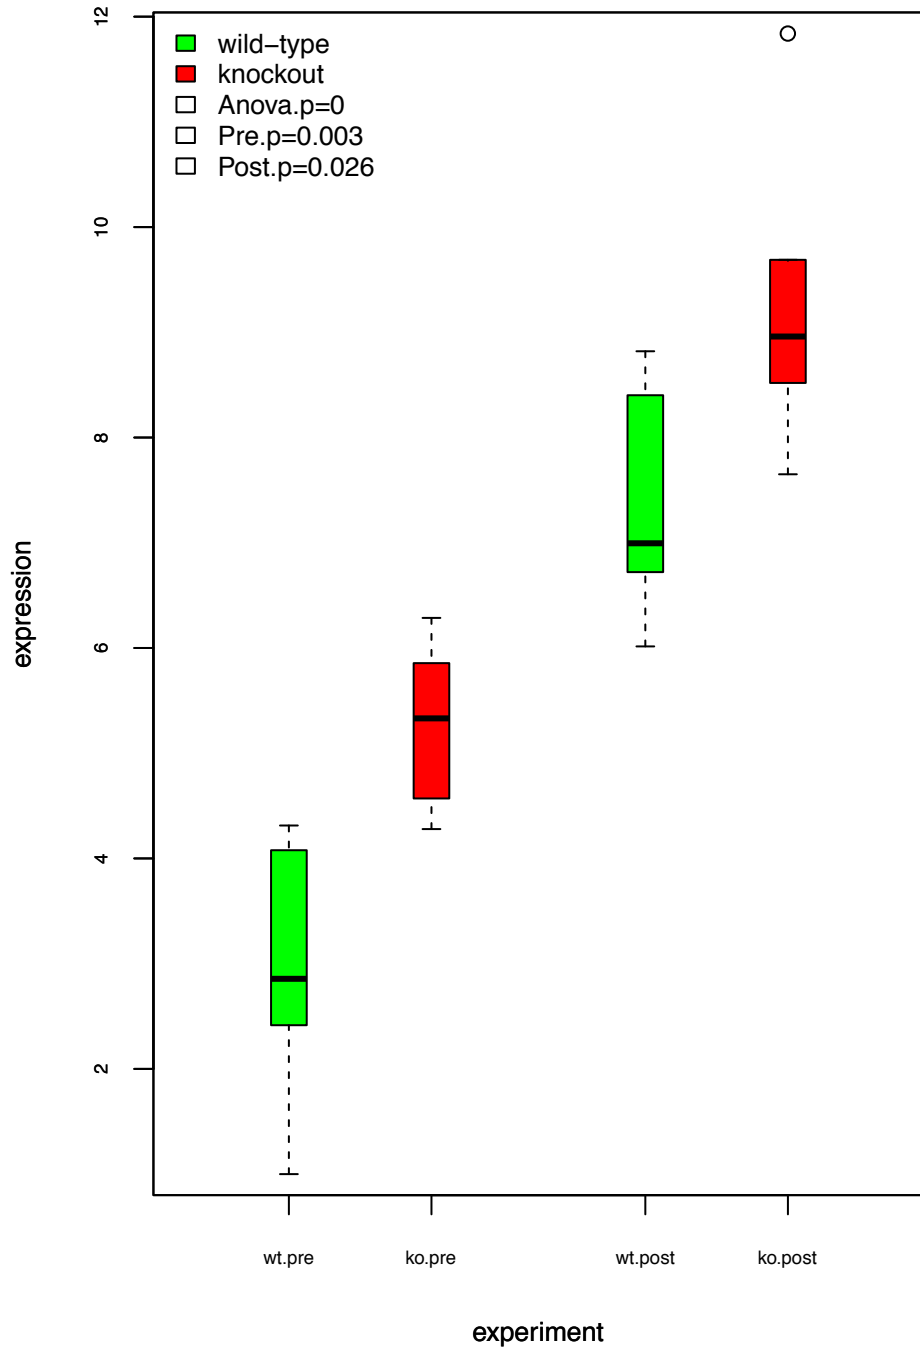

# DII1

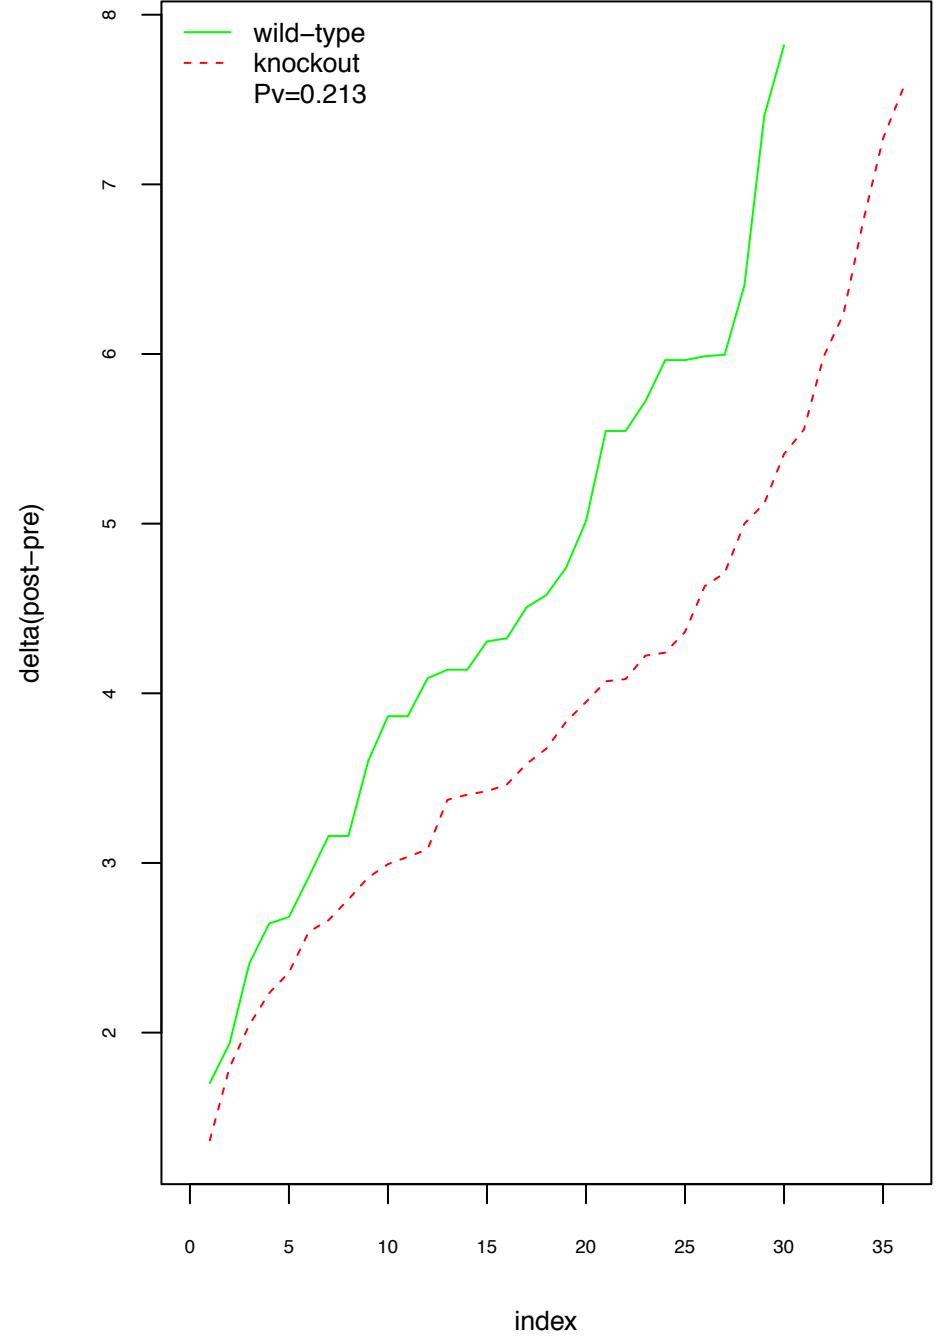

# Dkk1

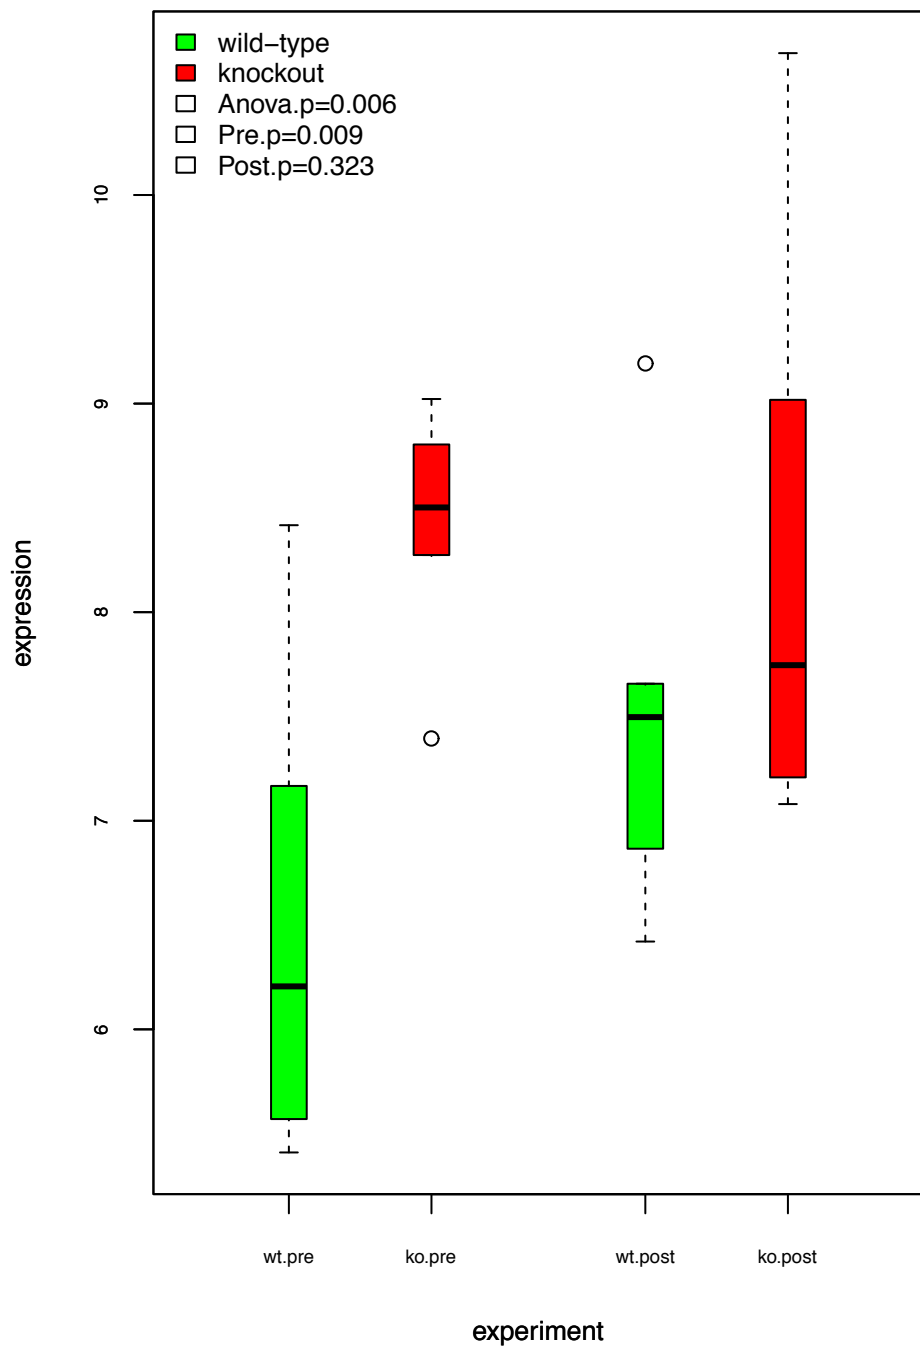

# Dkk1

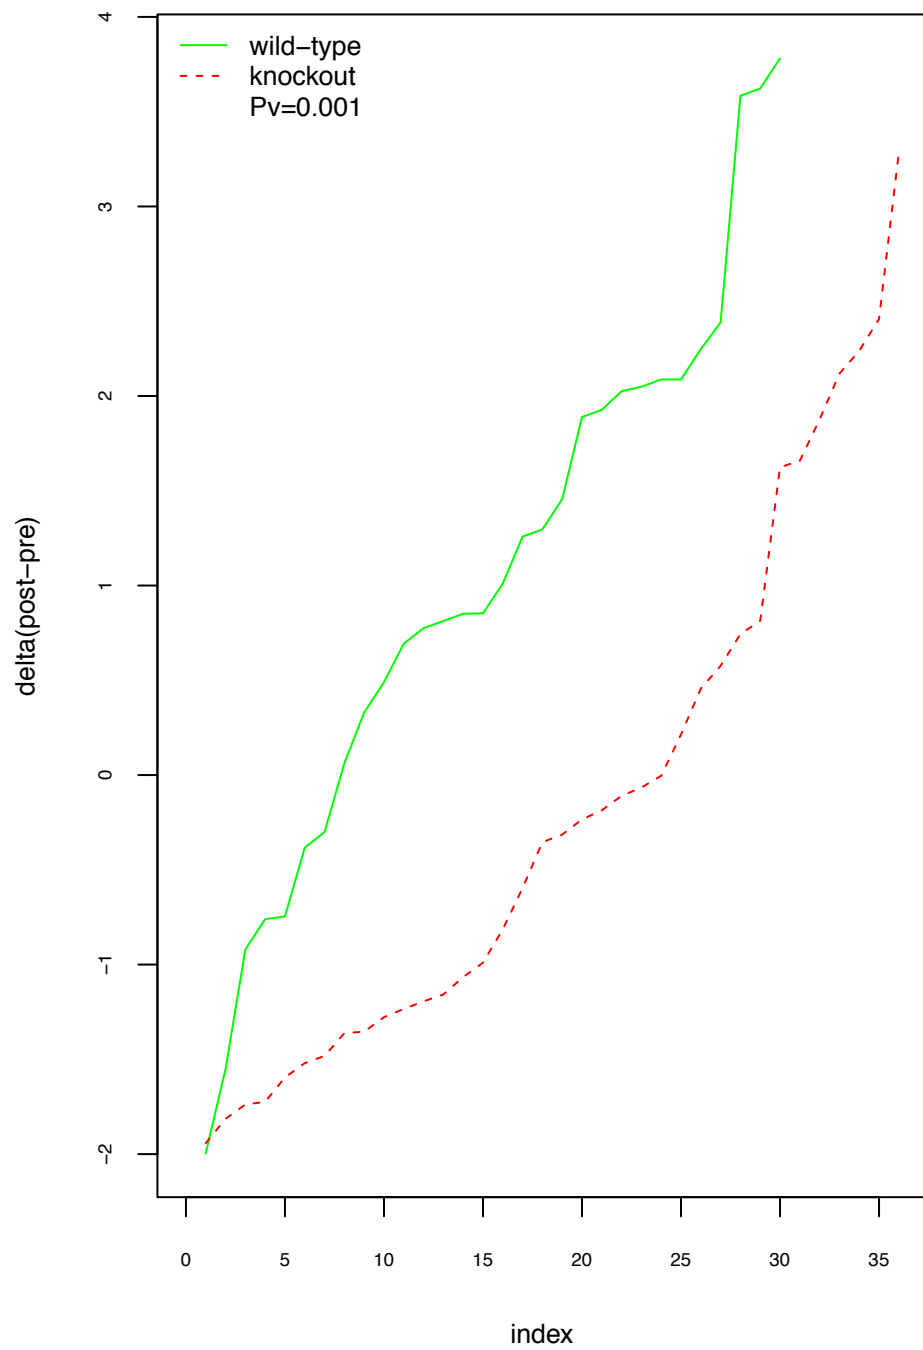



## Ddr2

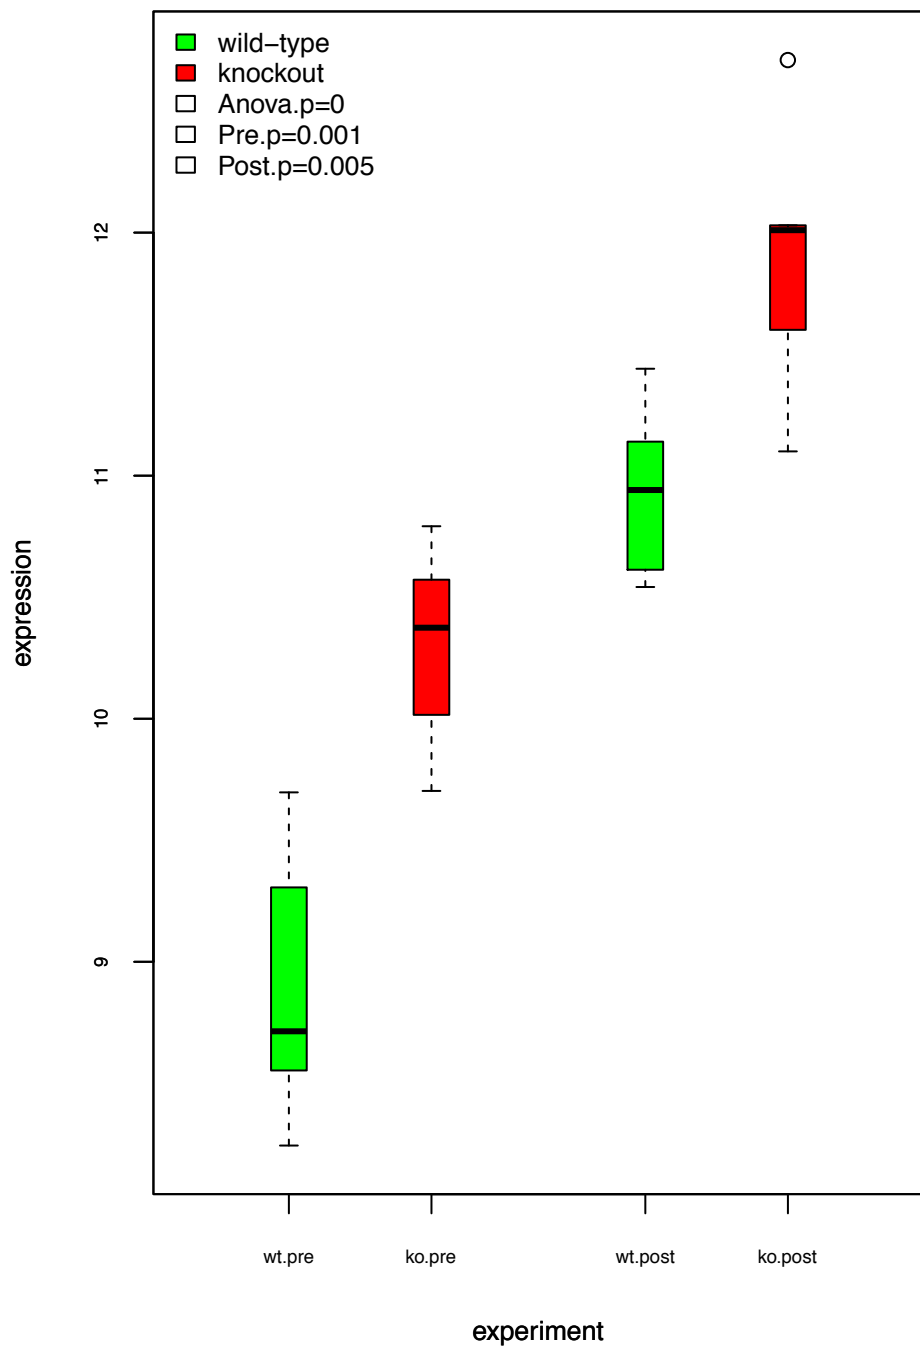

## Ddr2

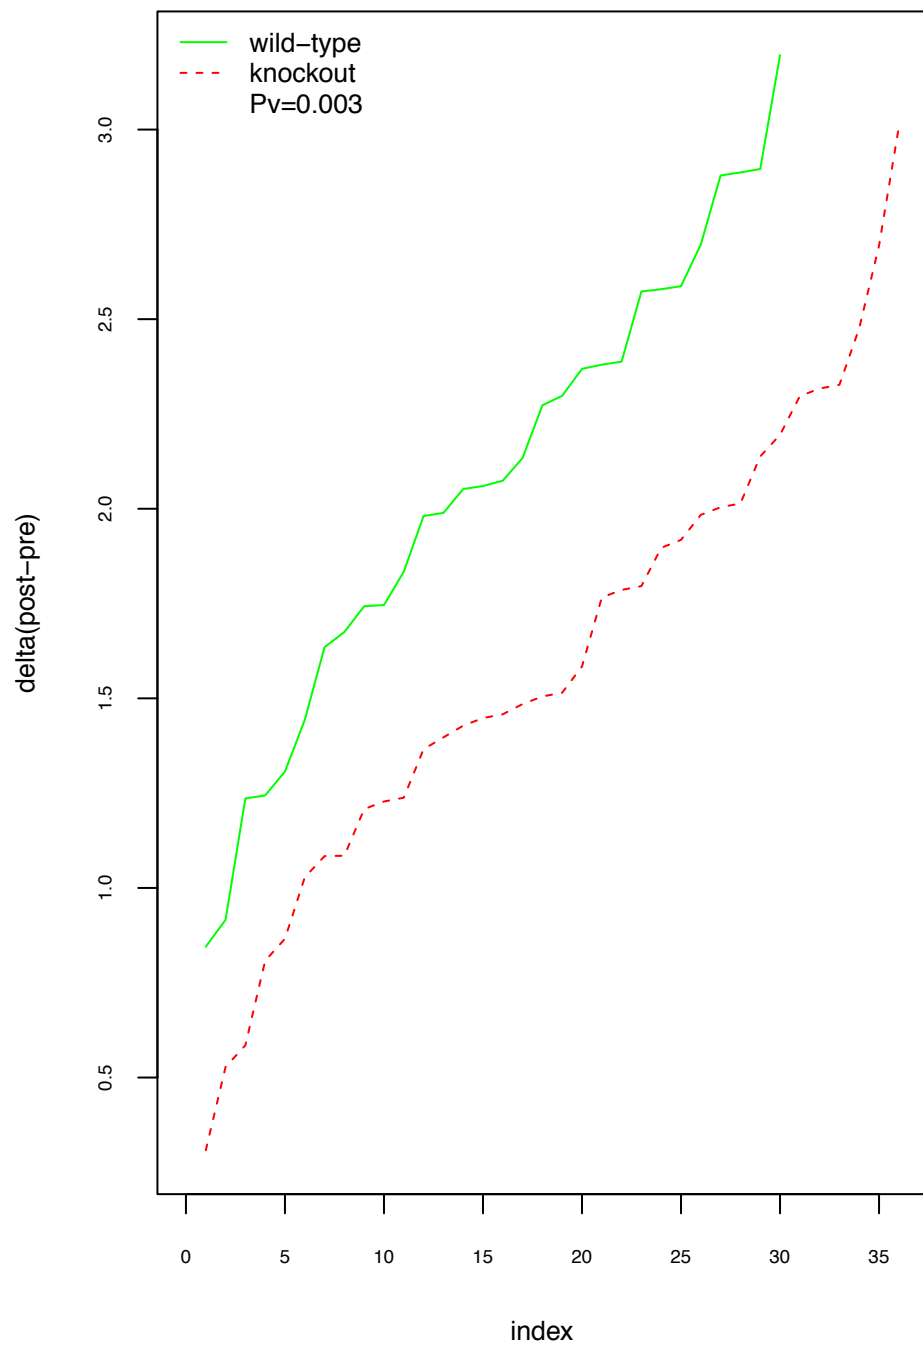

### Esr1

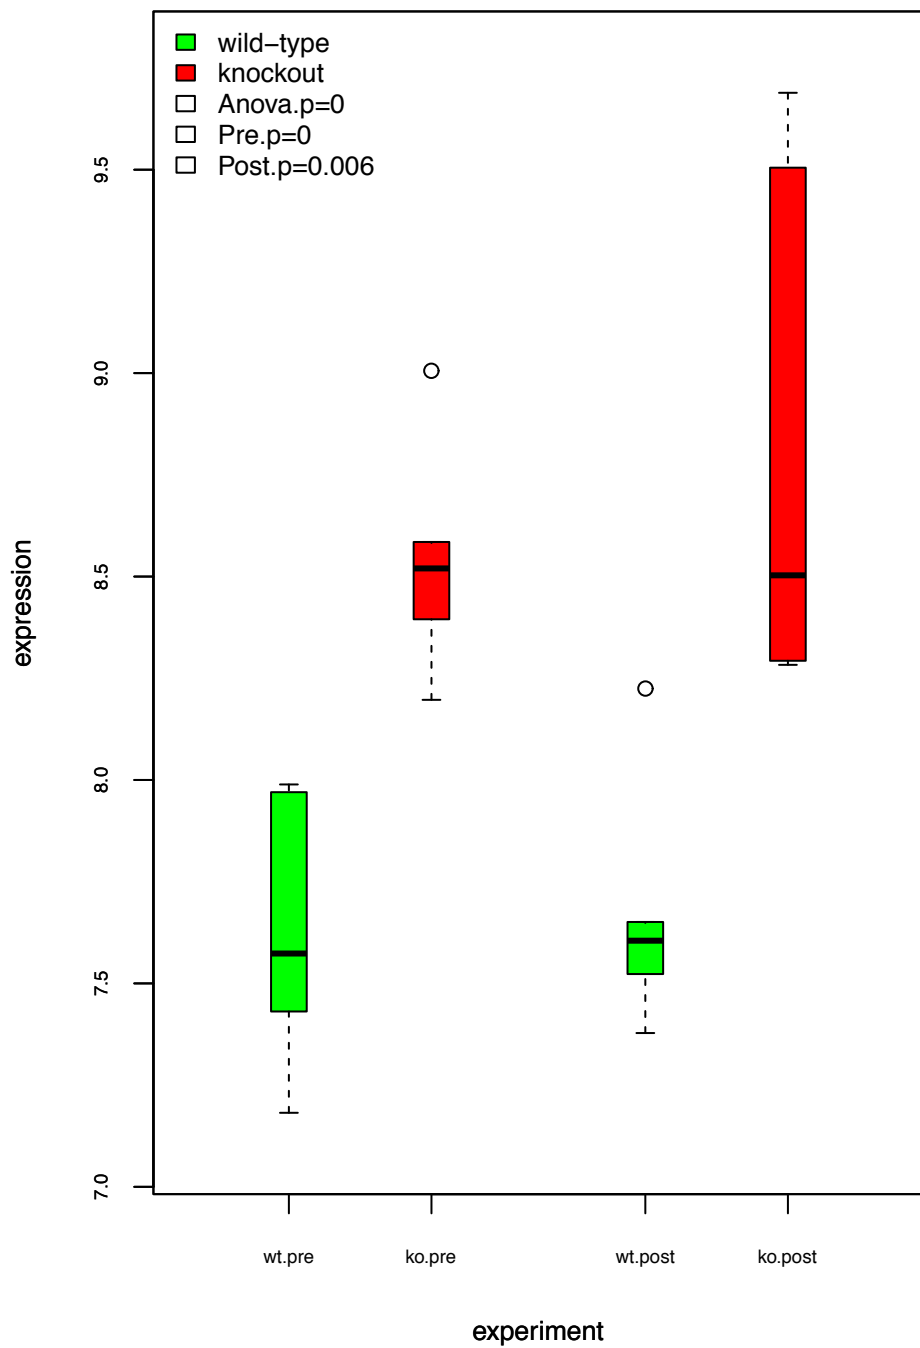

### Esr1

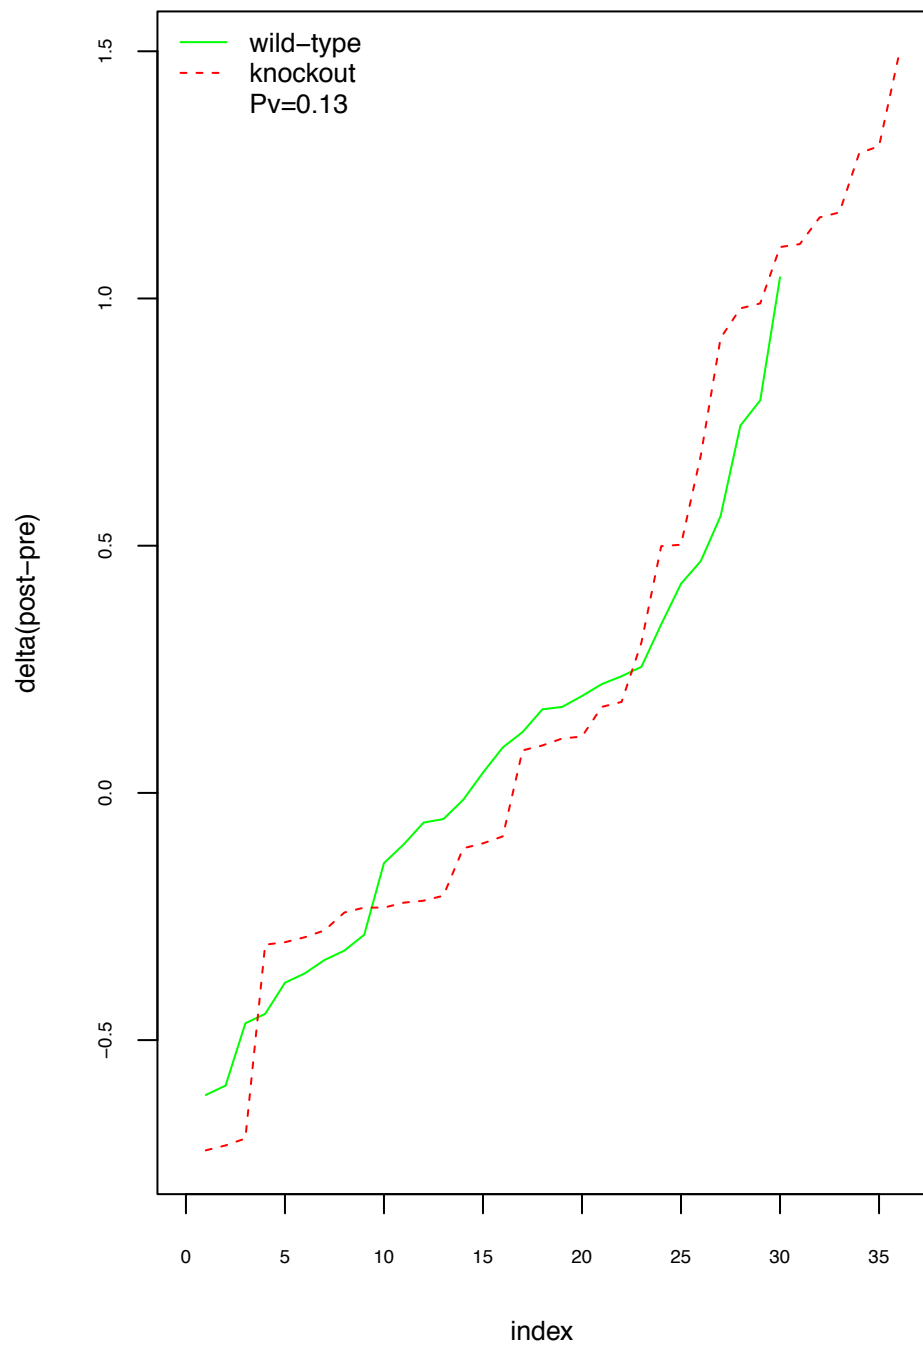

# Erg

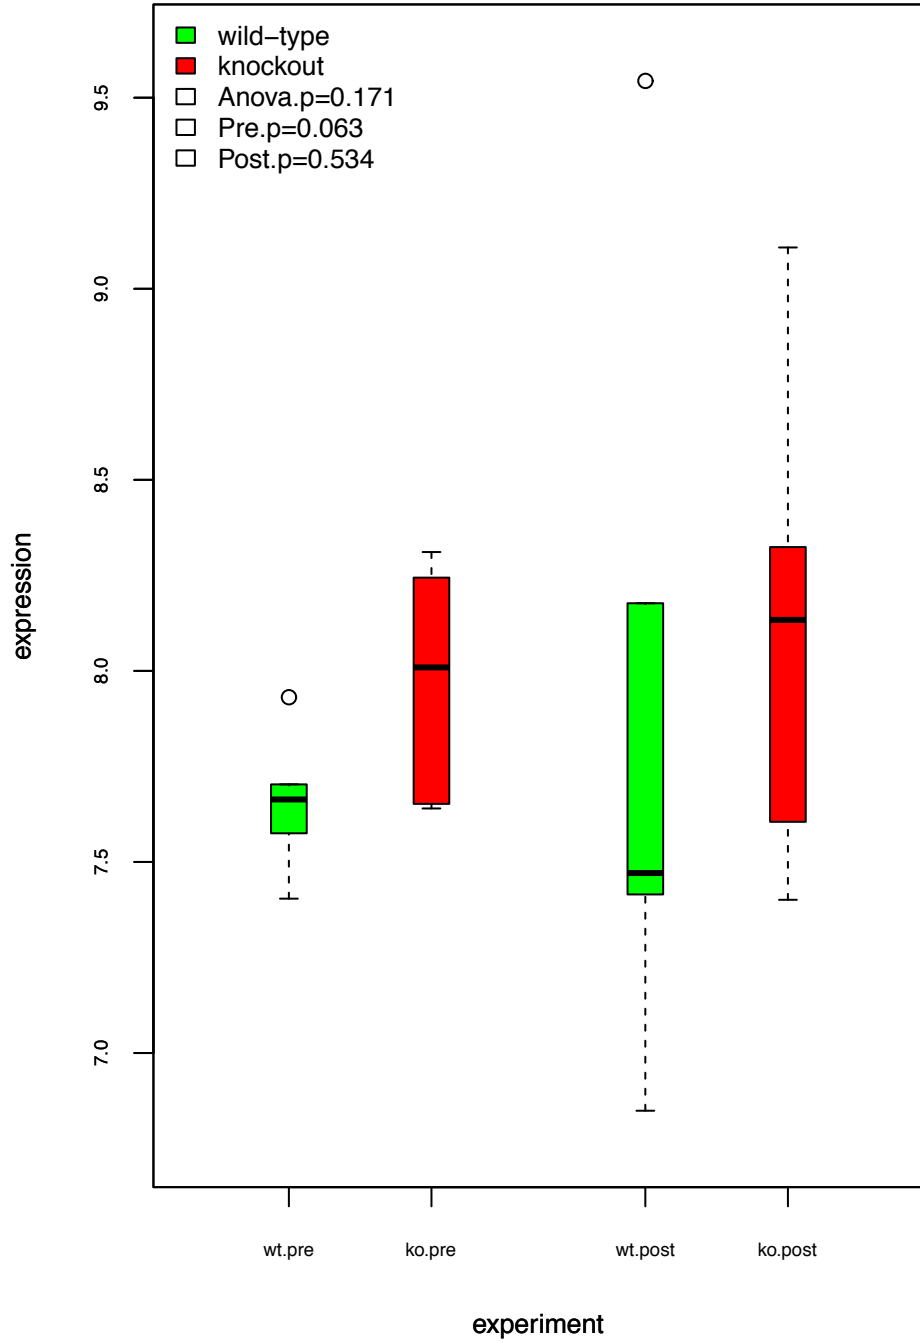

# Erg

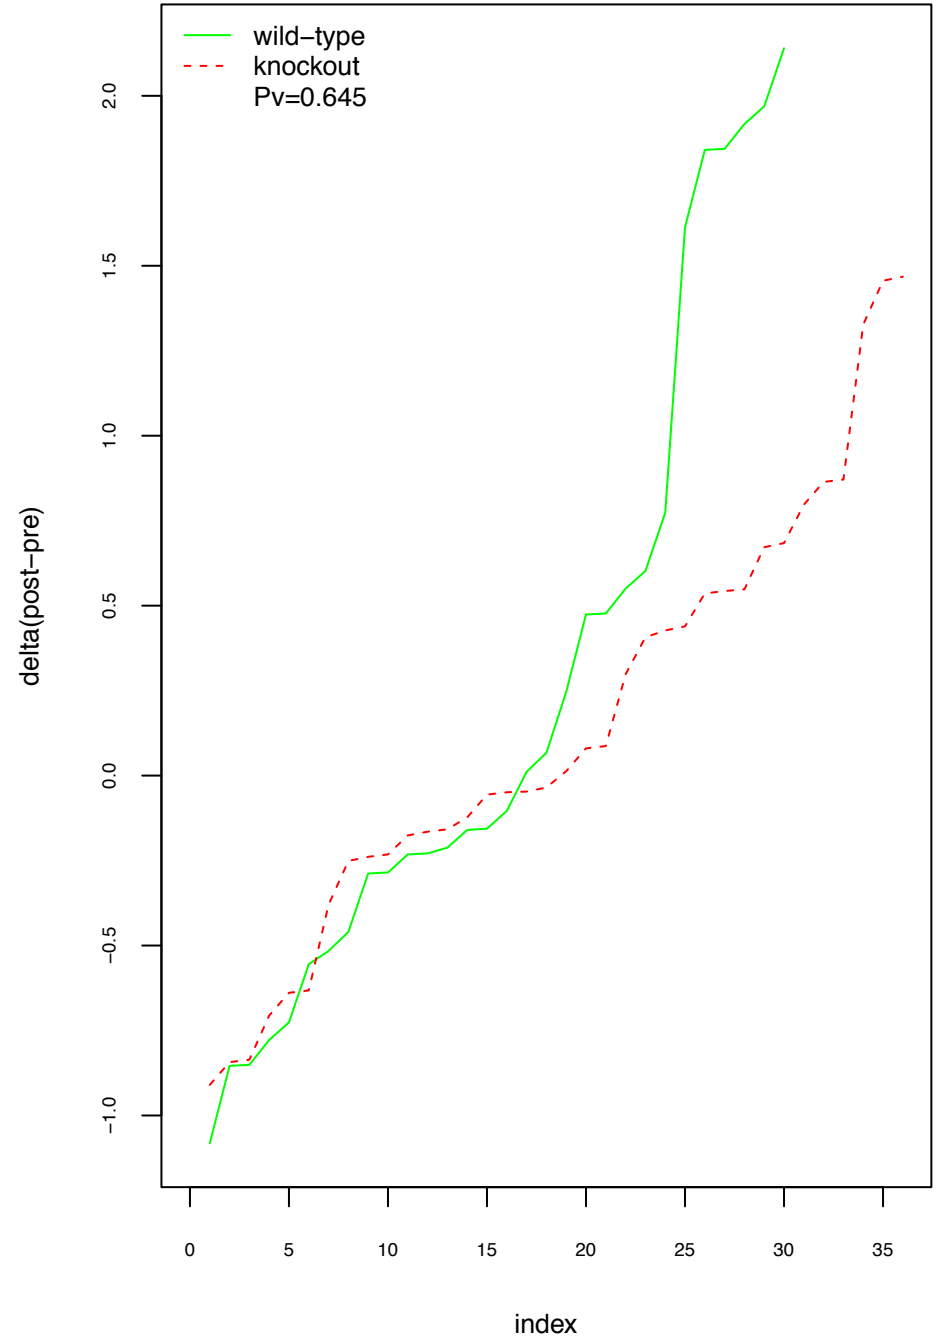

### Eng1

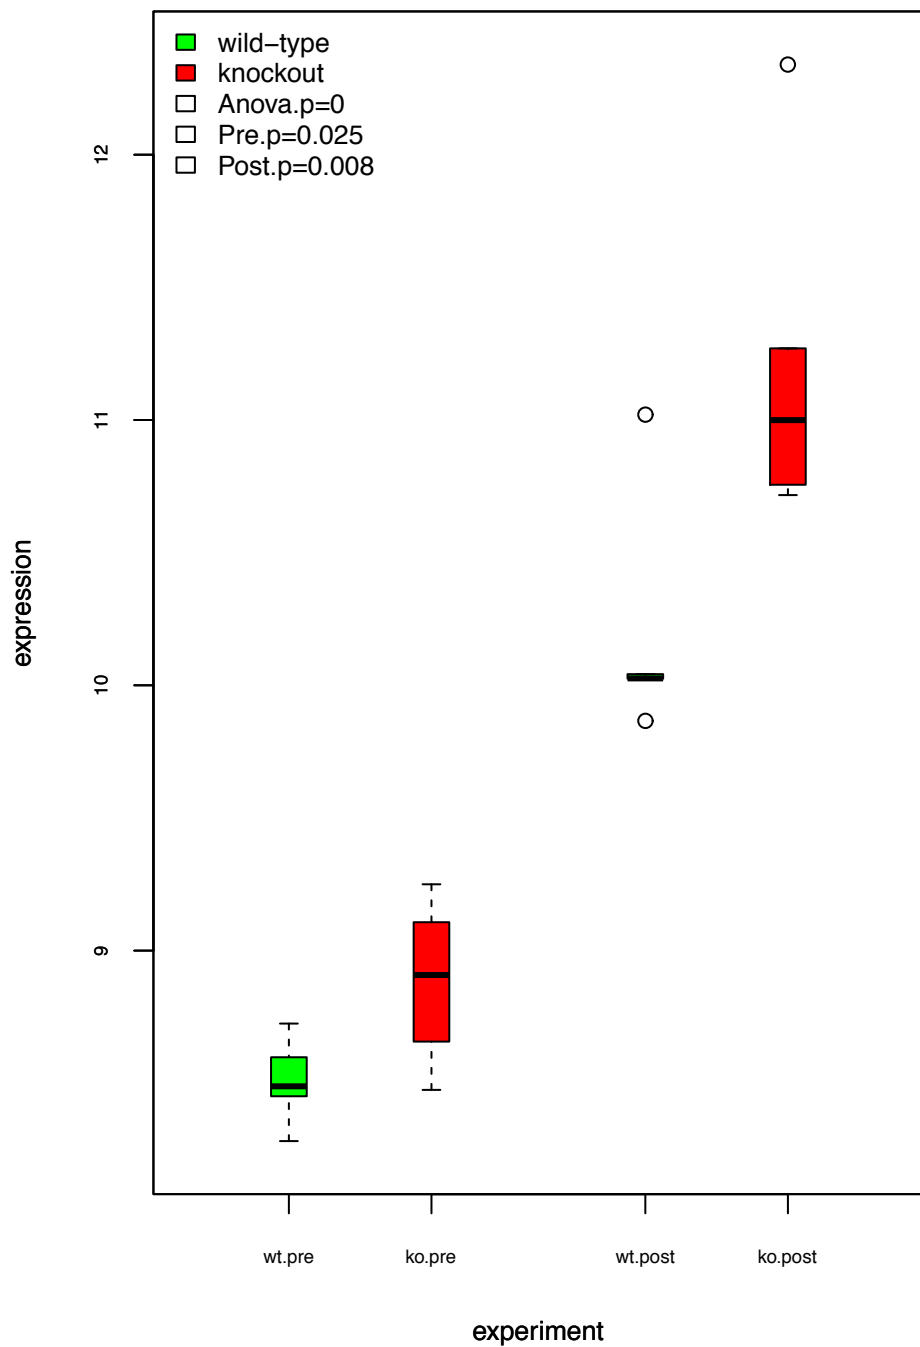

### Eng1

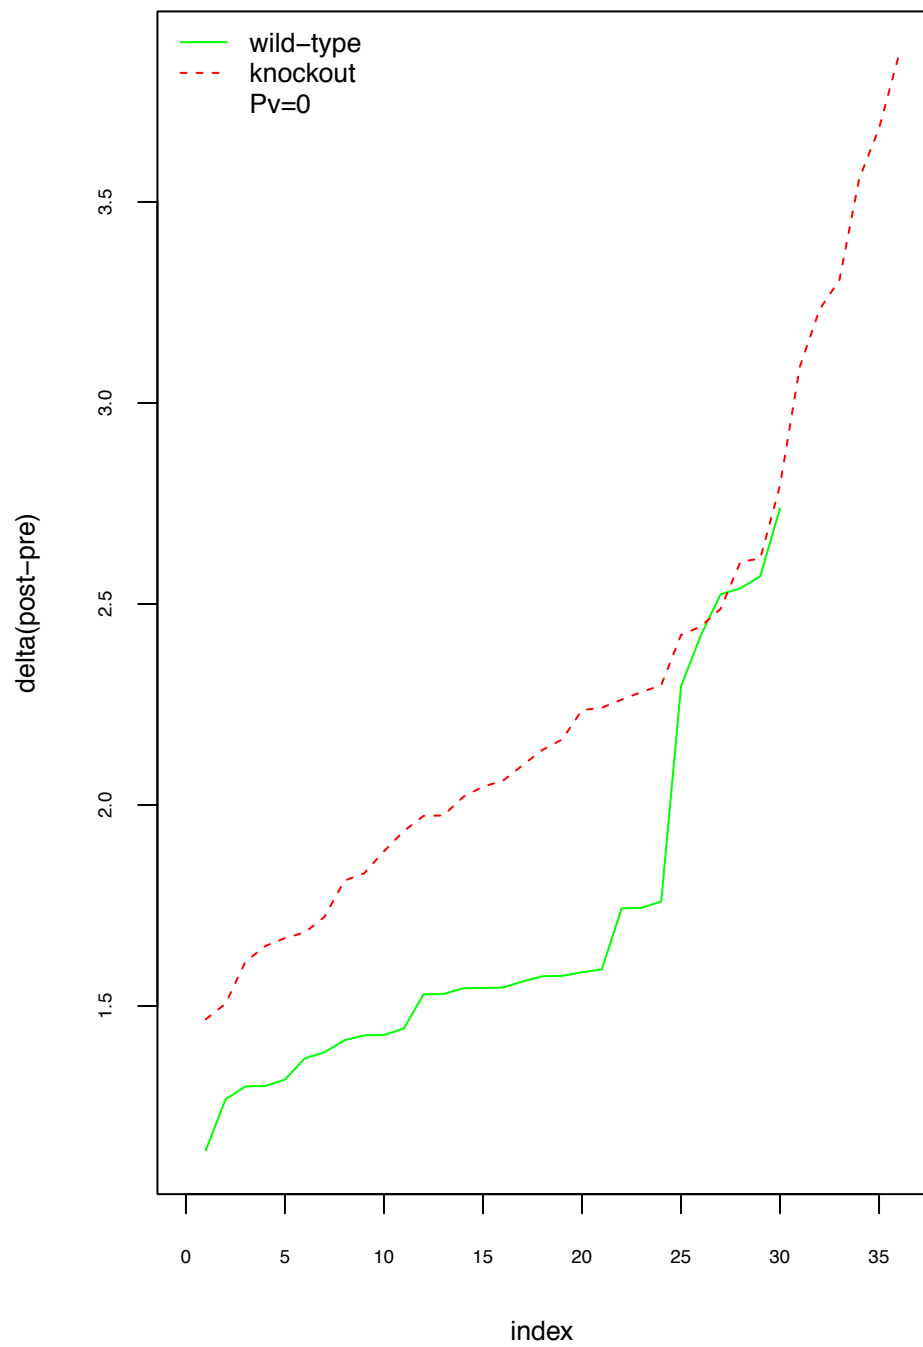

### Fzd7

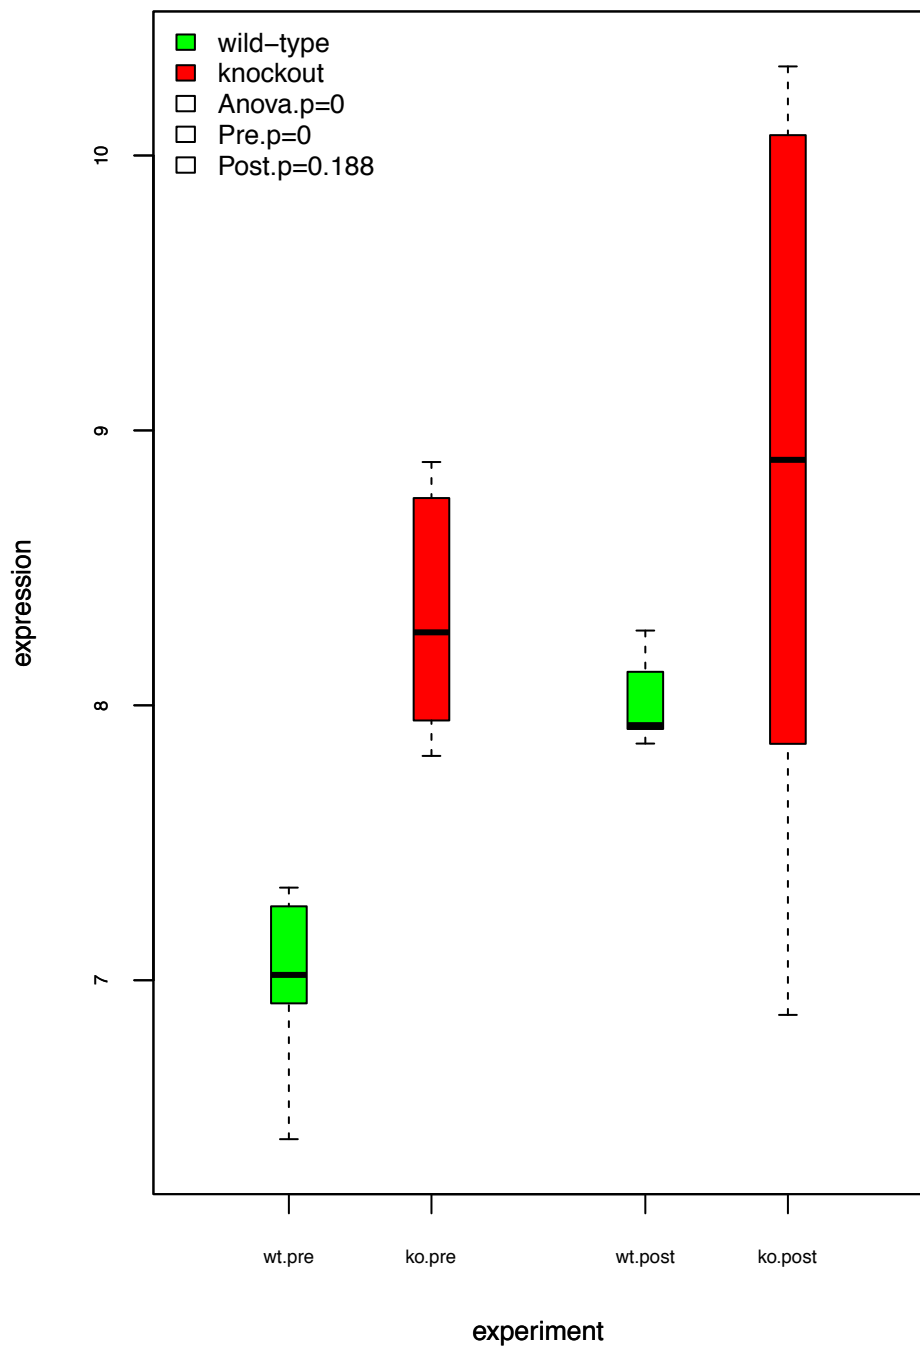

### Fzd7

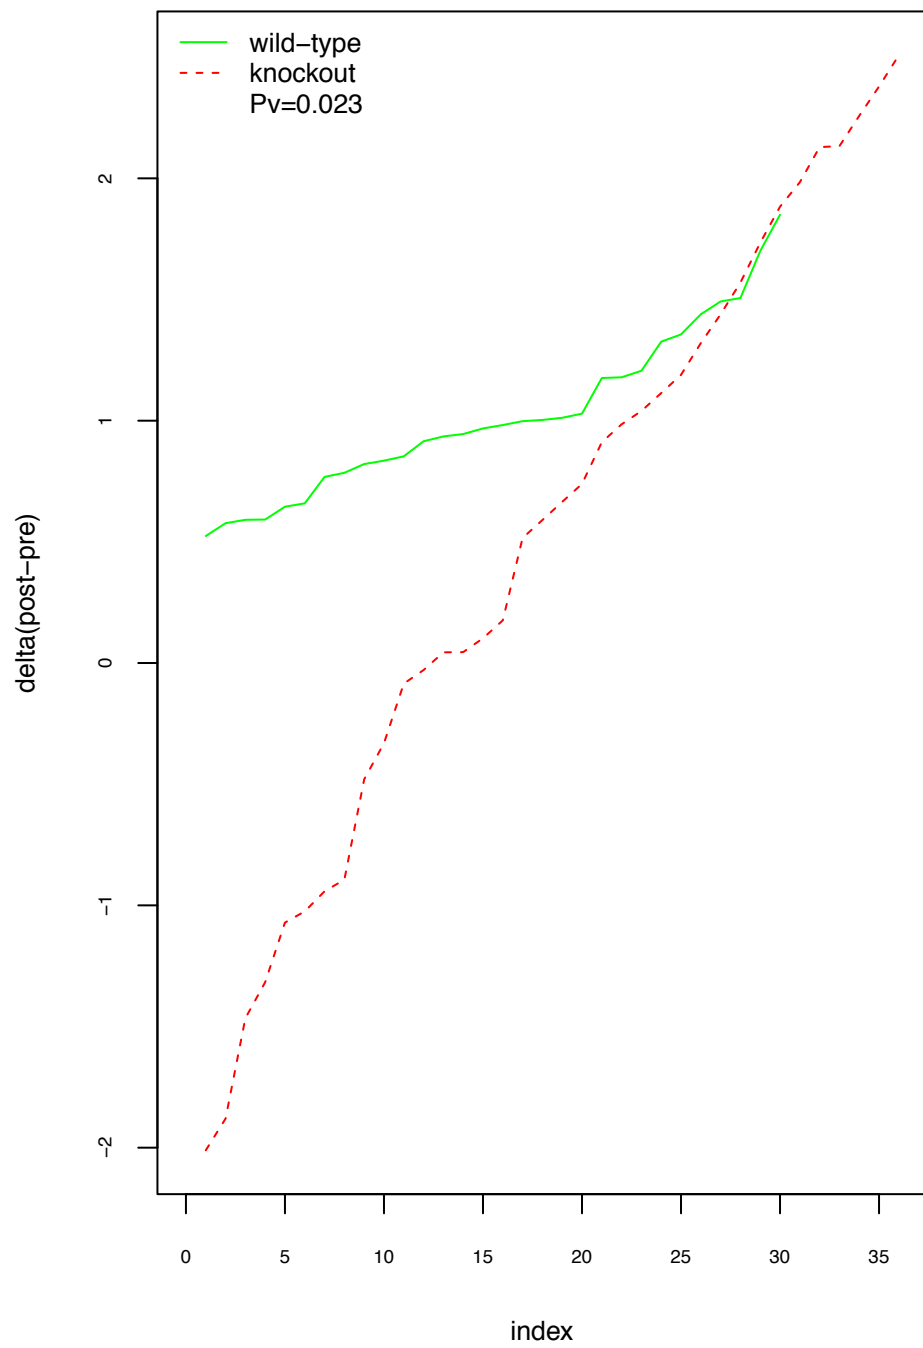

# FrzB

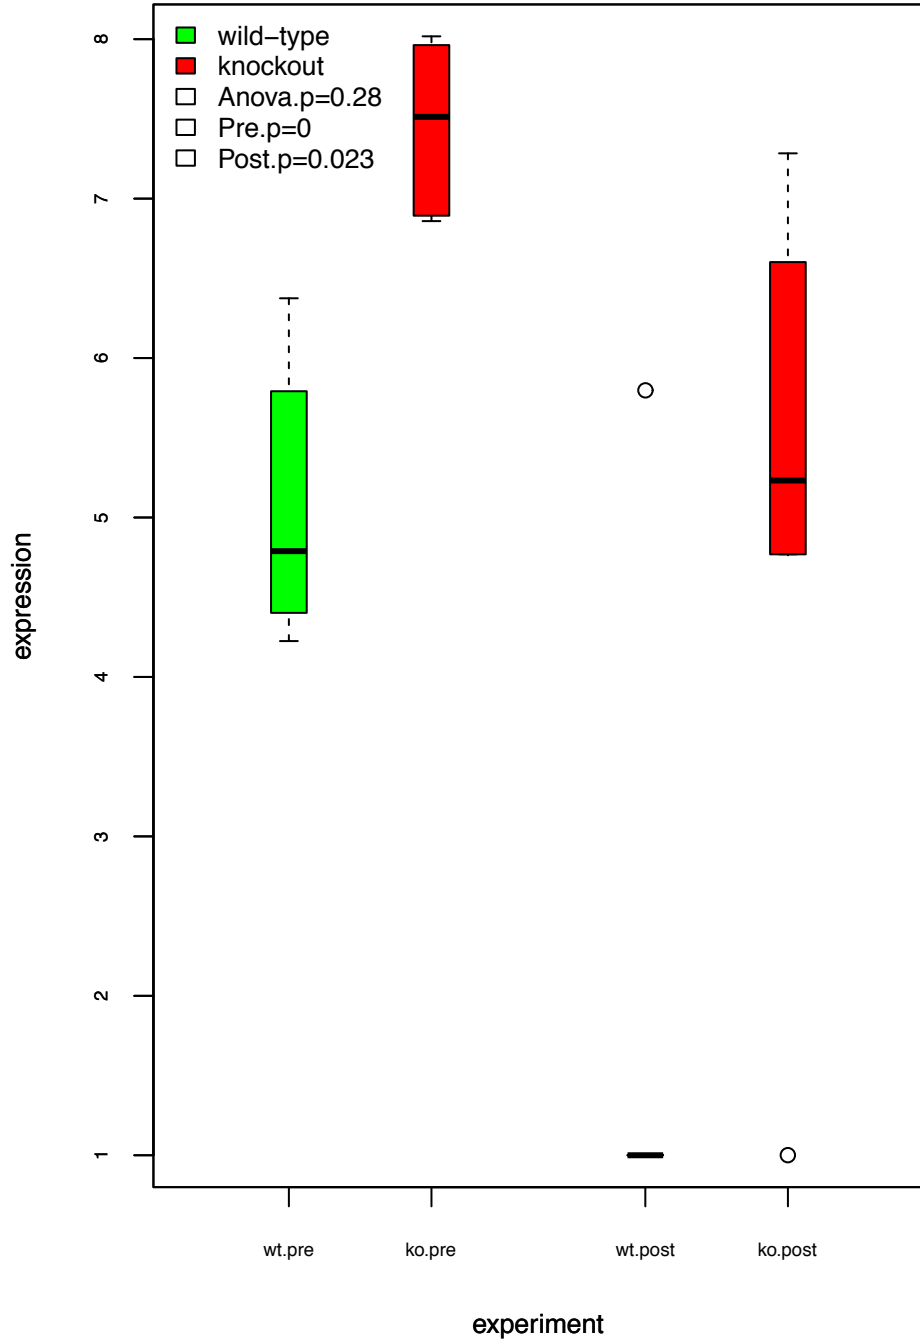

# FrzB

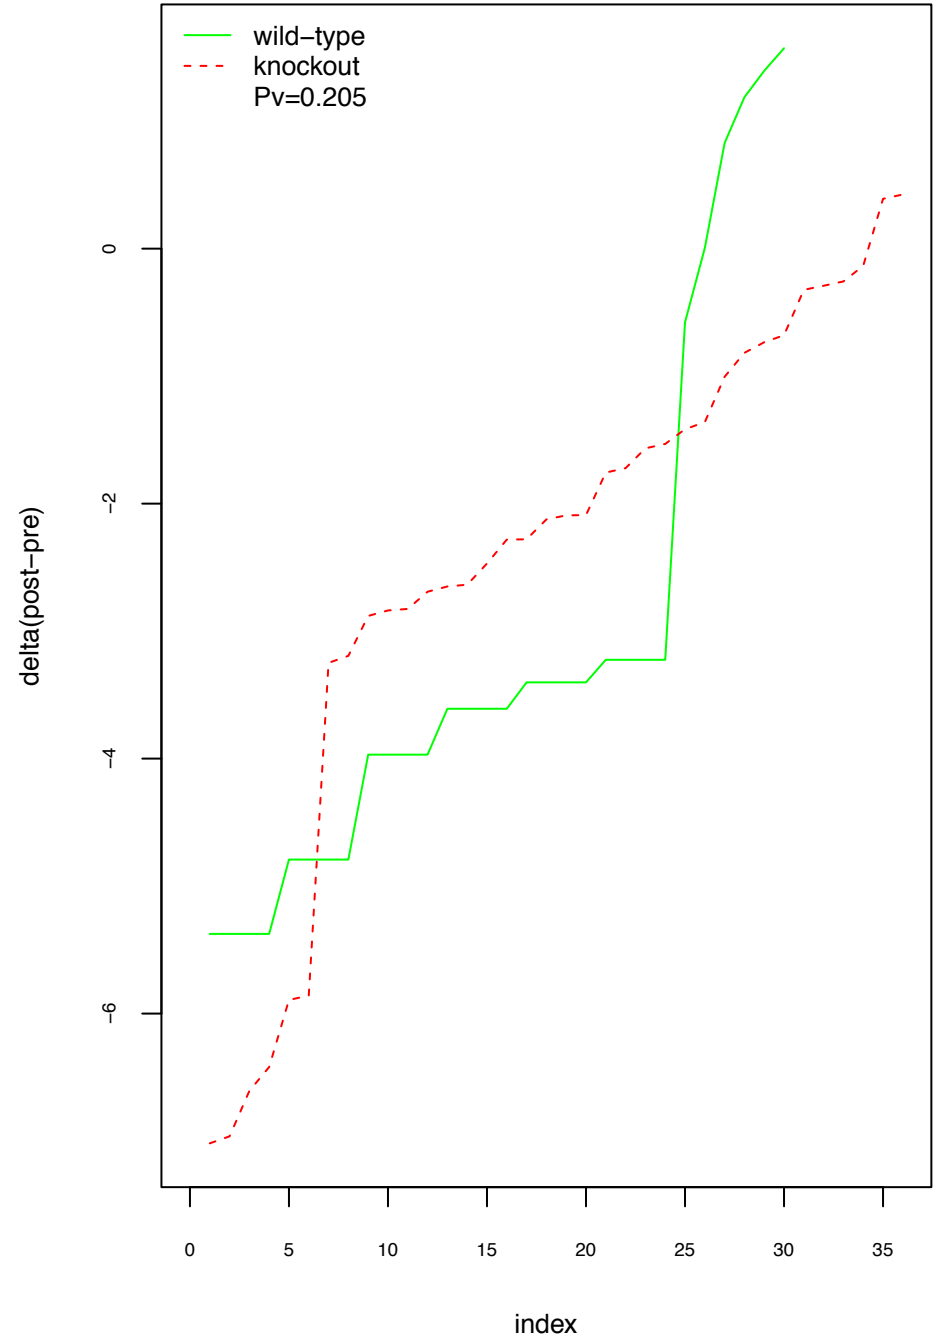

### Fgfr3

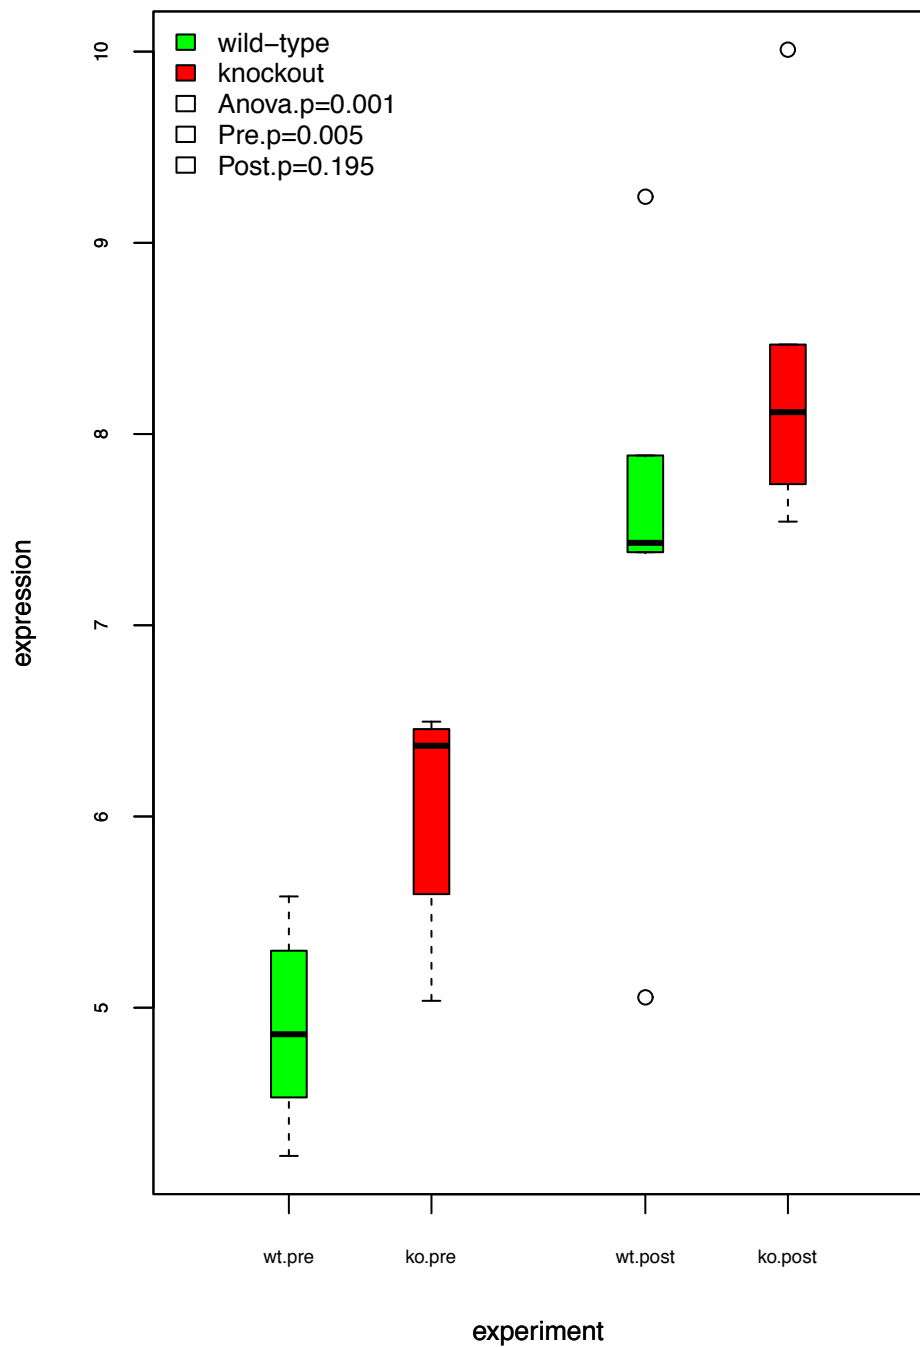

### Fgfr3

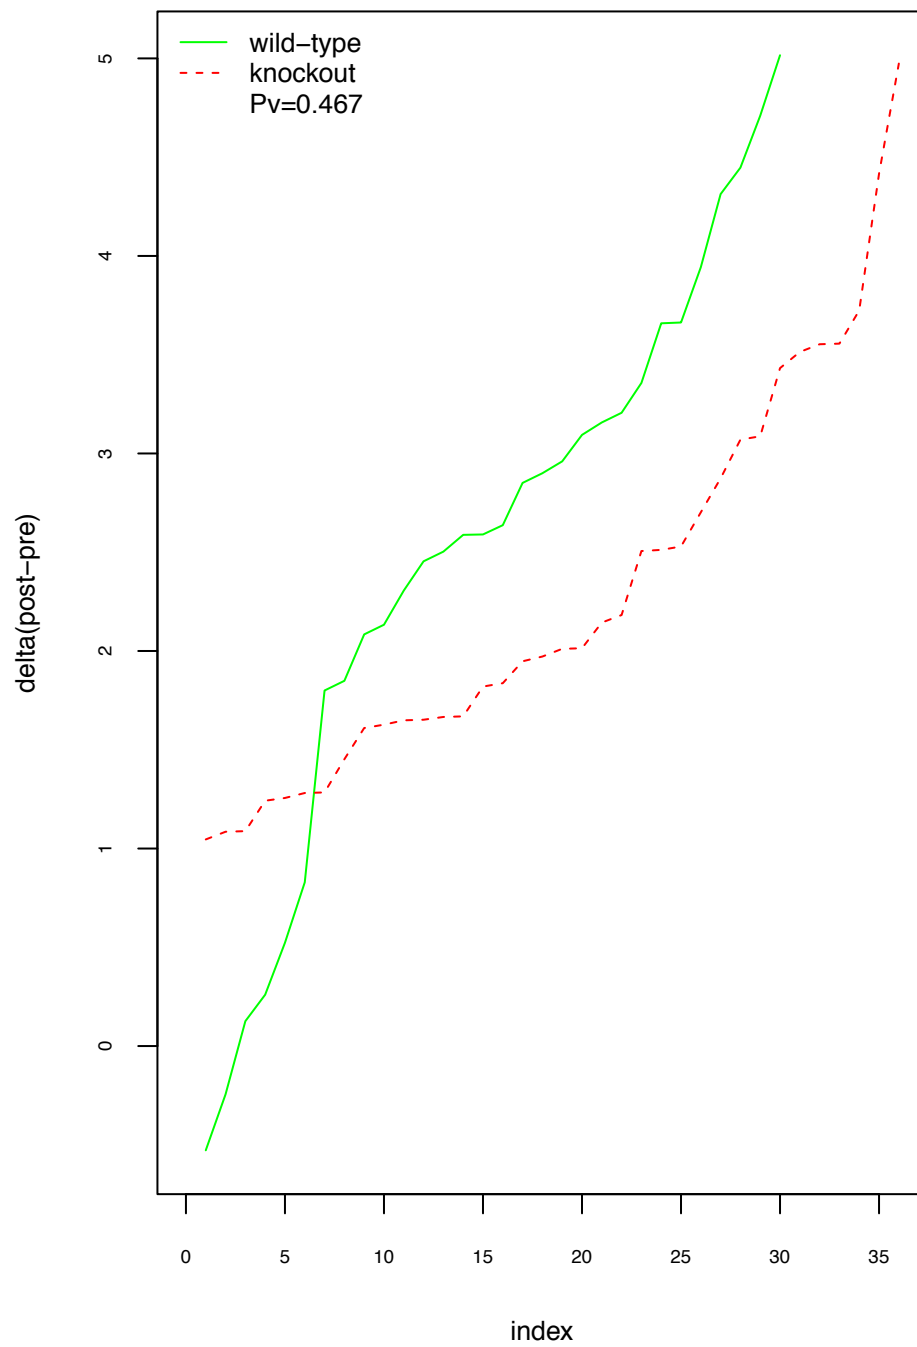

### Fgfr2

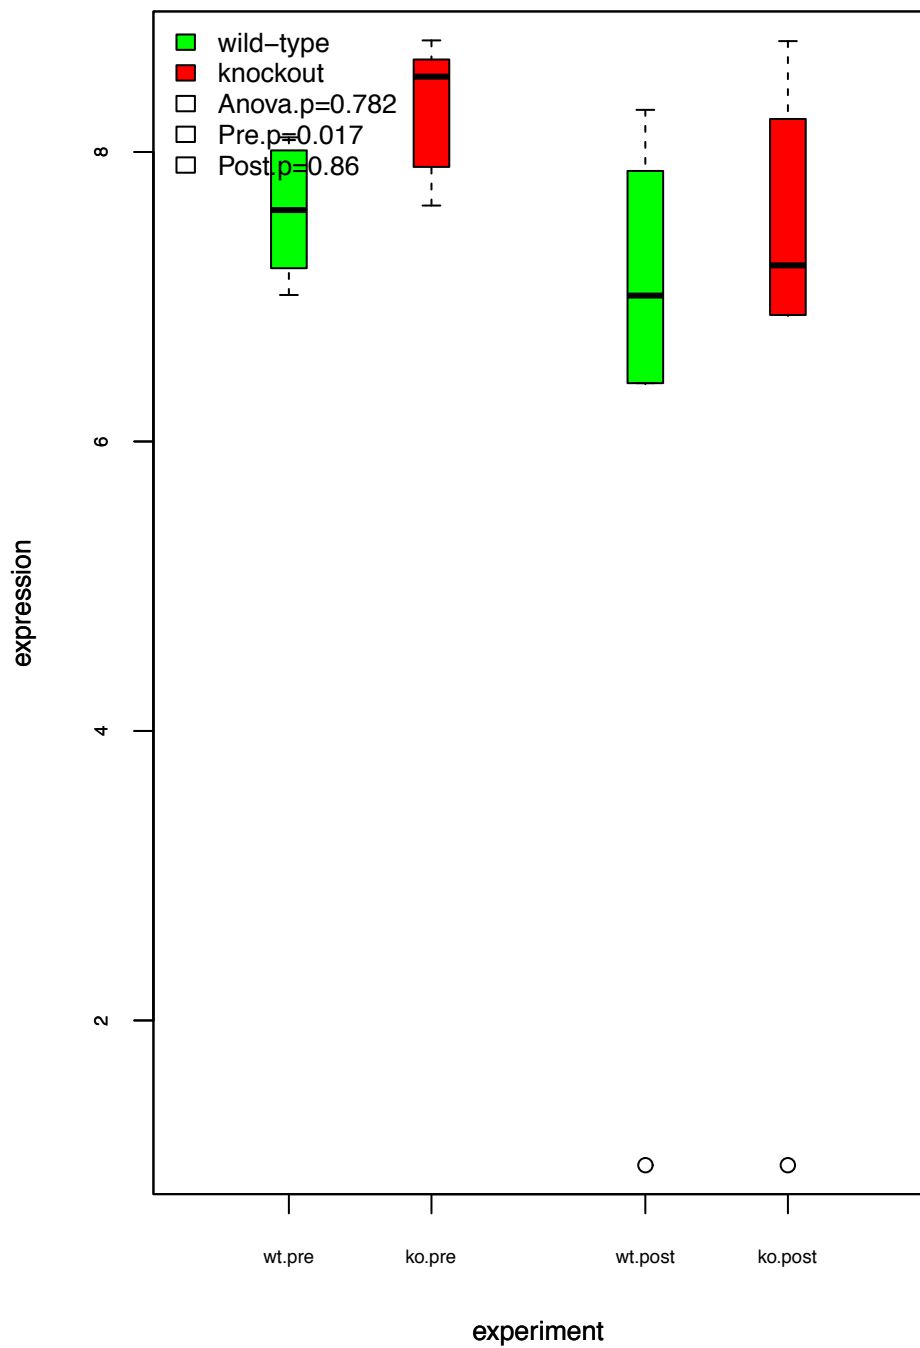

### Fgfr2

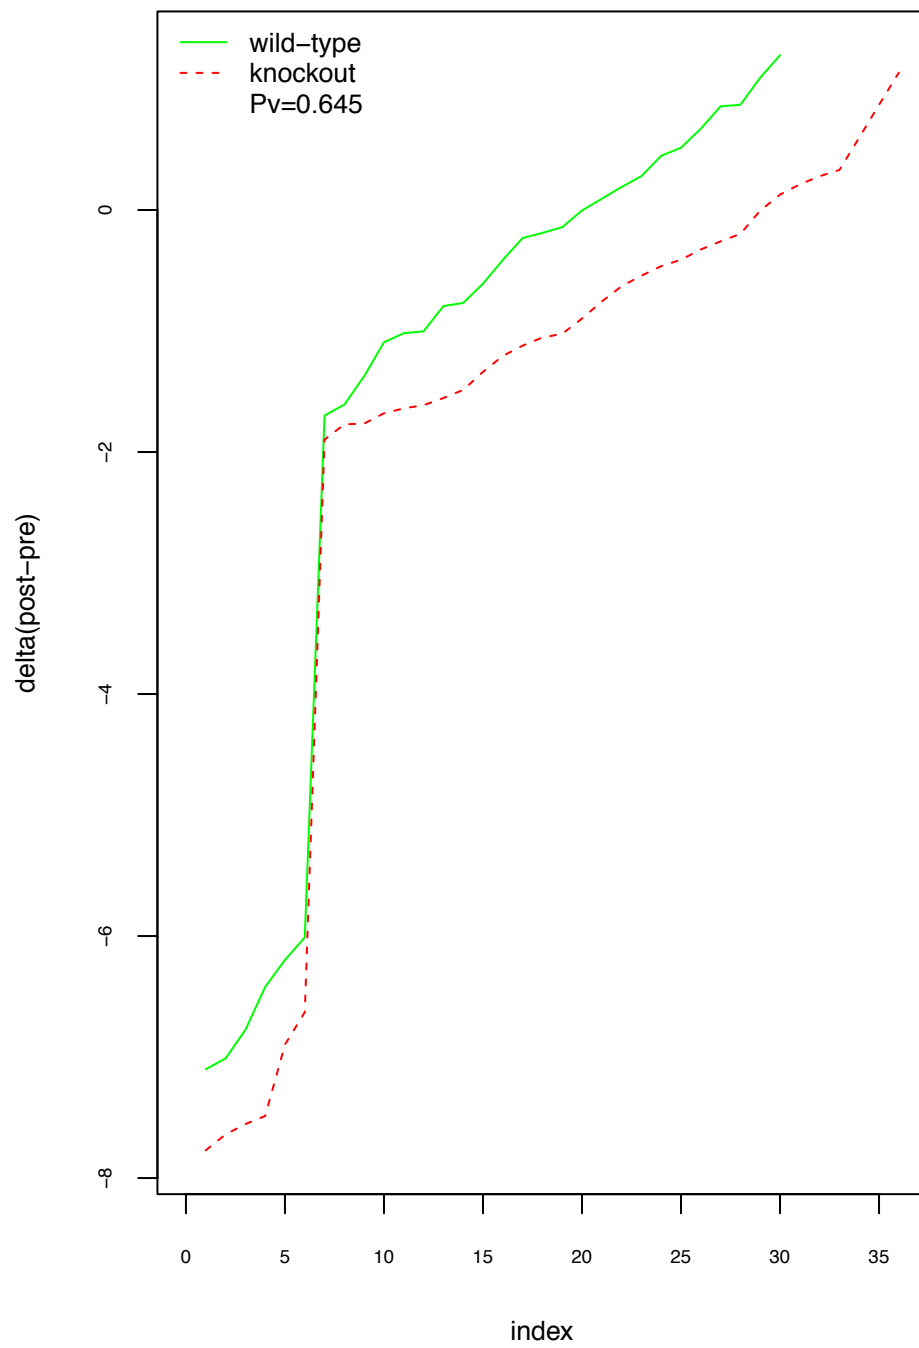



### Fgfr1

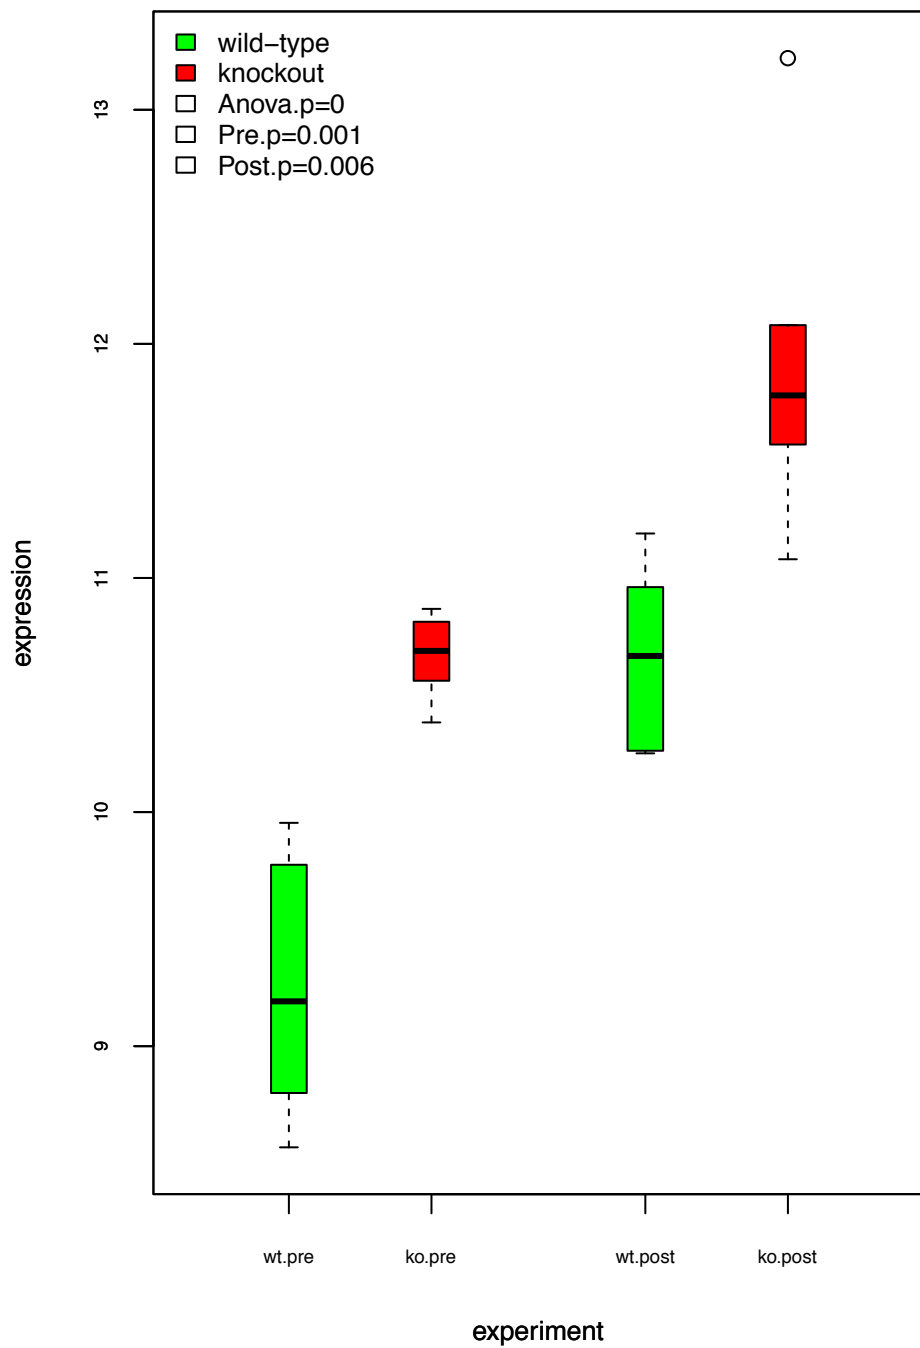

### Fgfr1

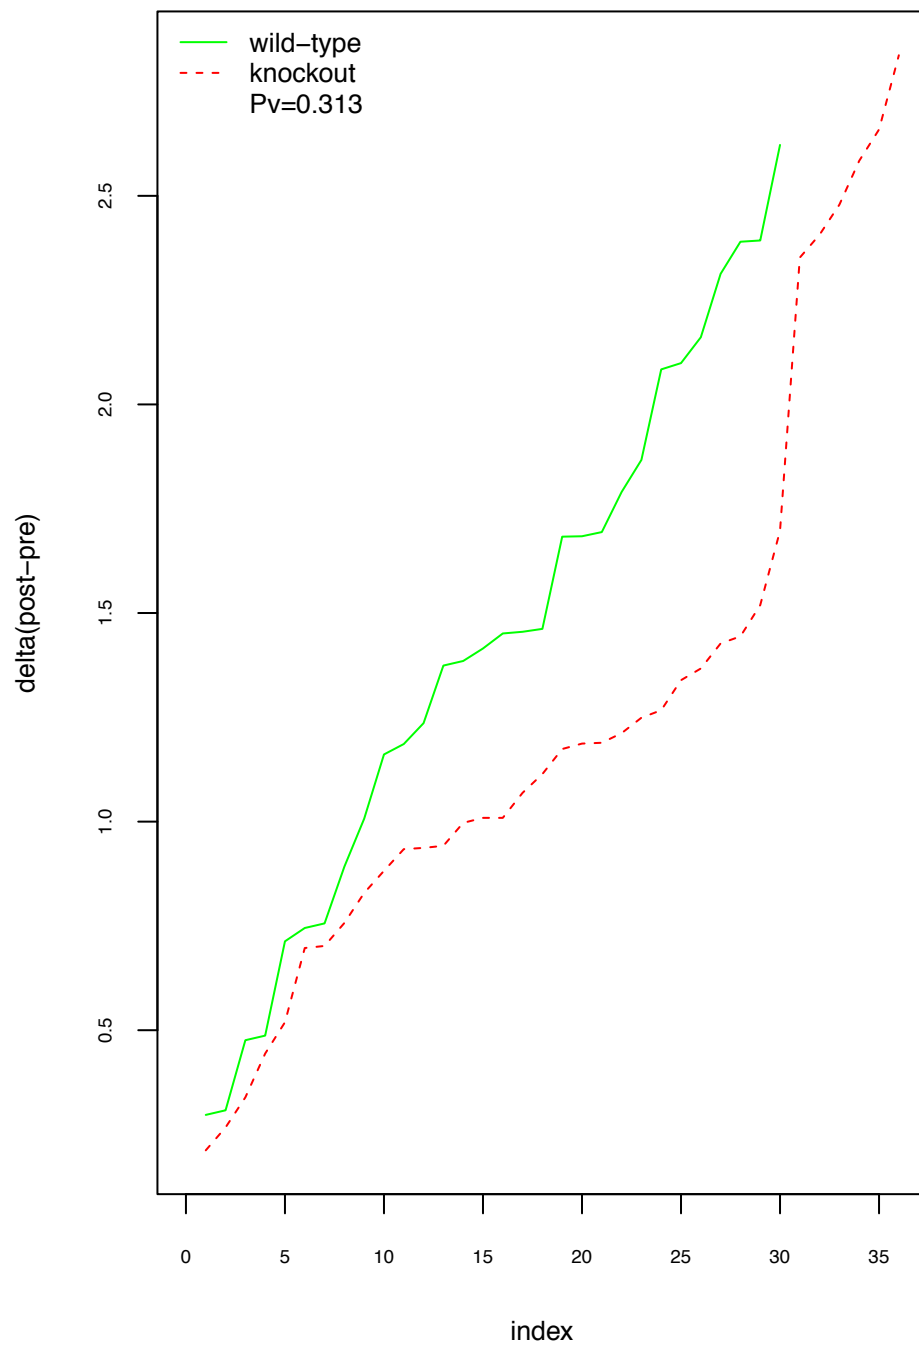

### Fgf23

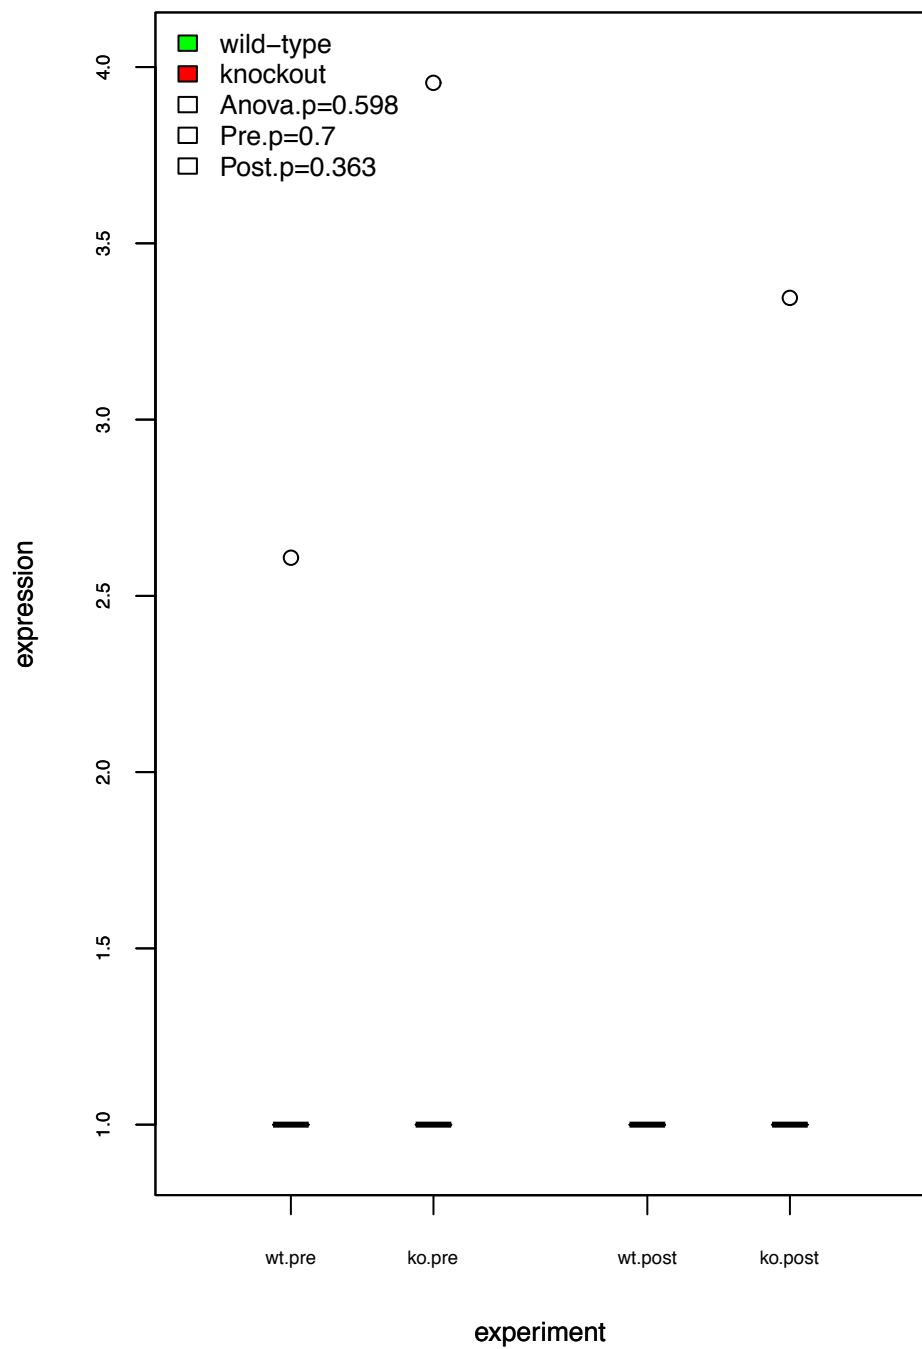

### Fgf23

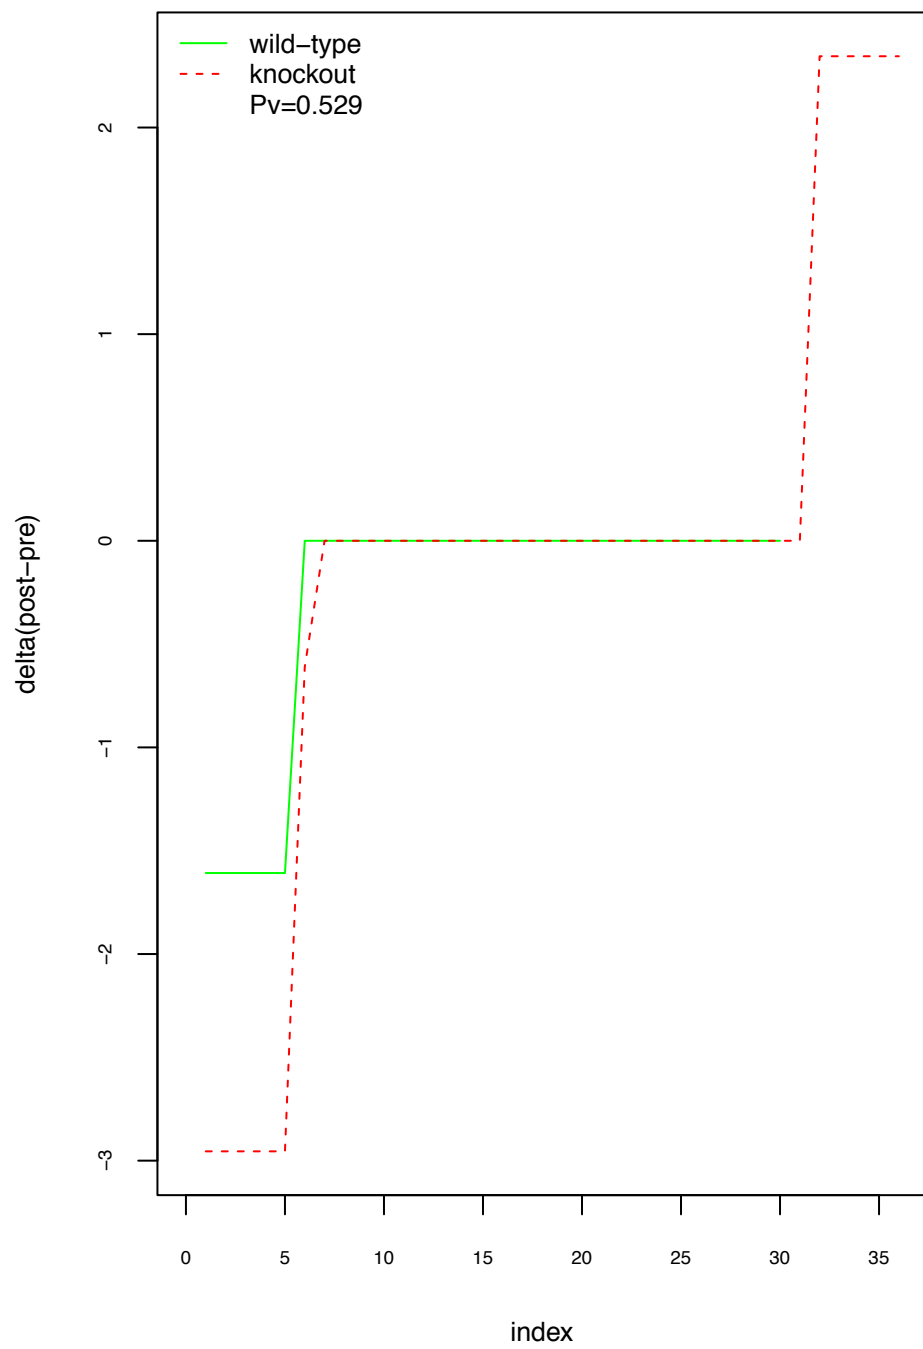

### Fgf18

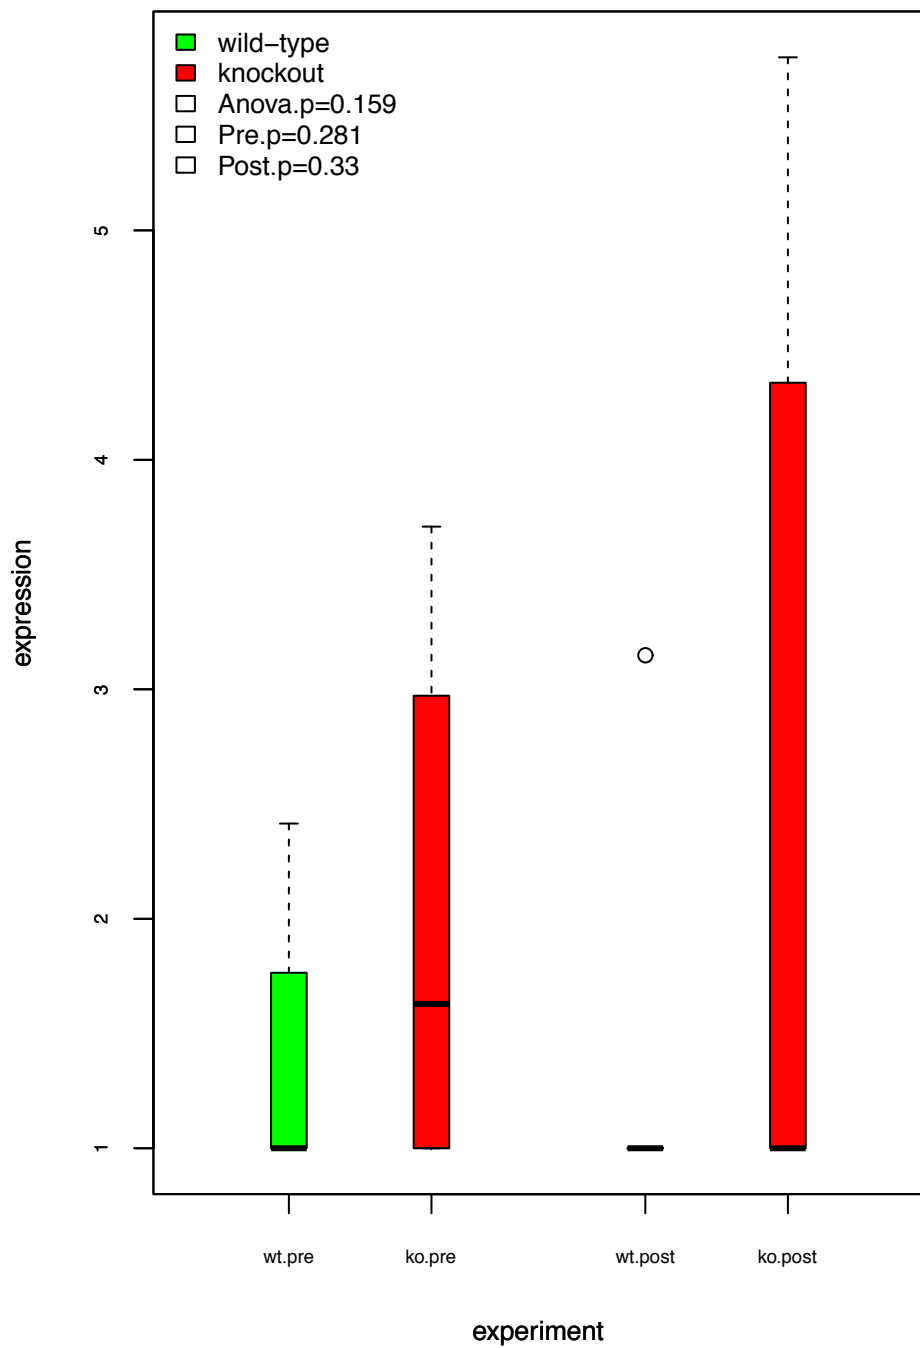

### Fgf18

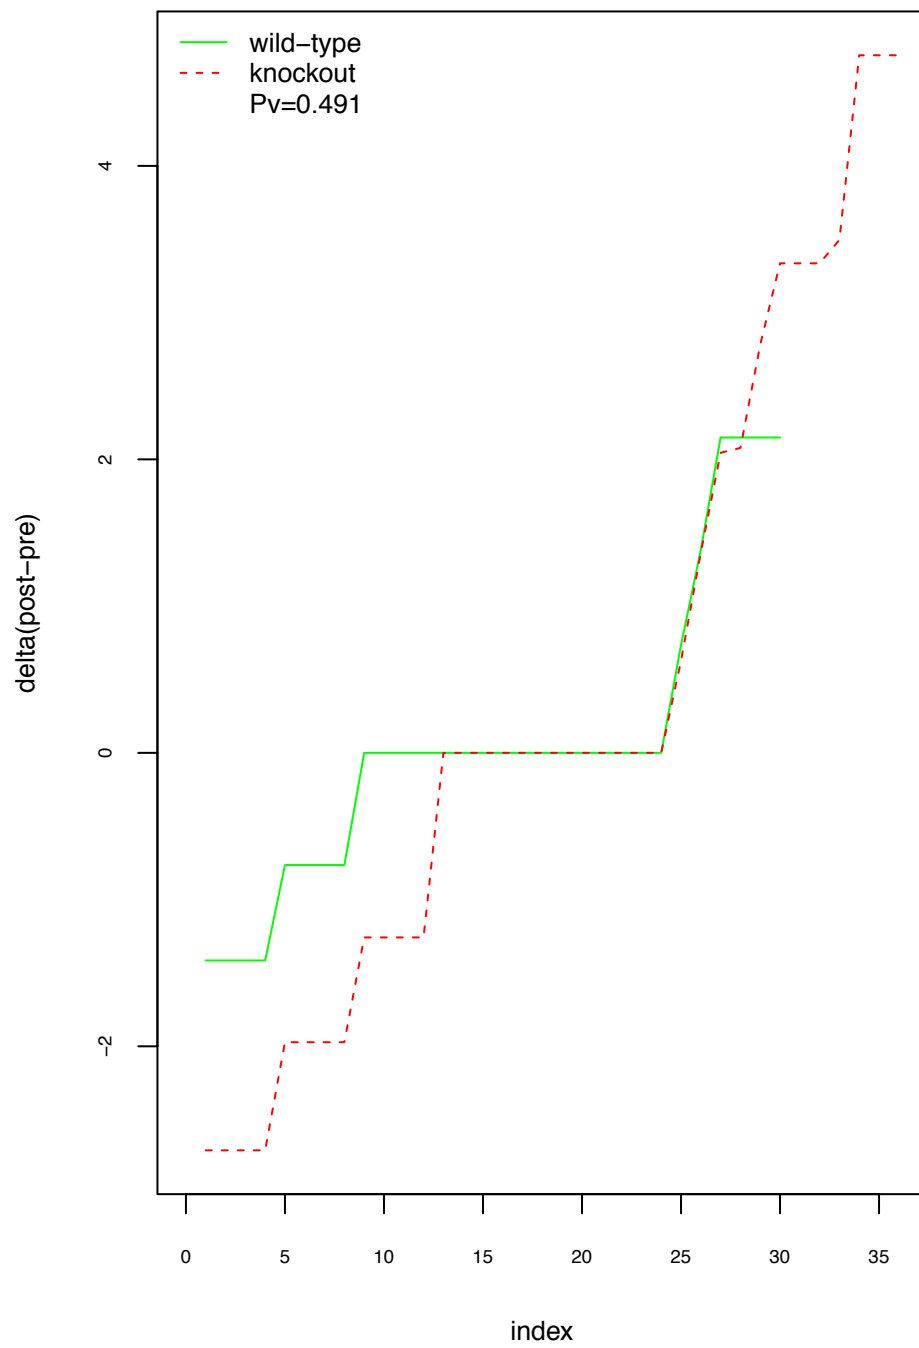

## FGF2

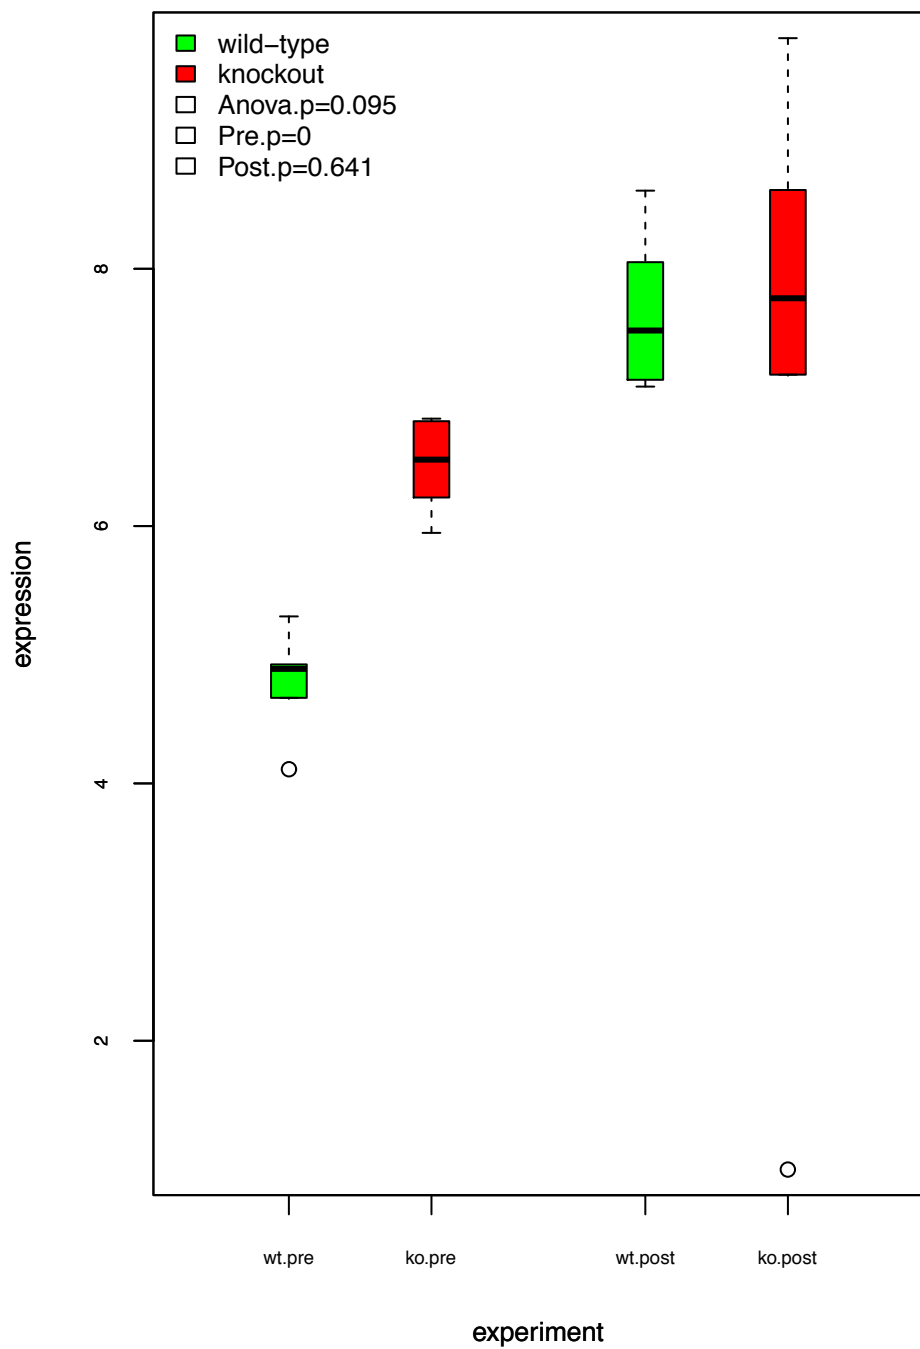

## FGF2

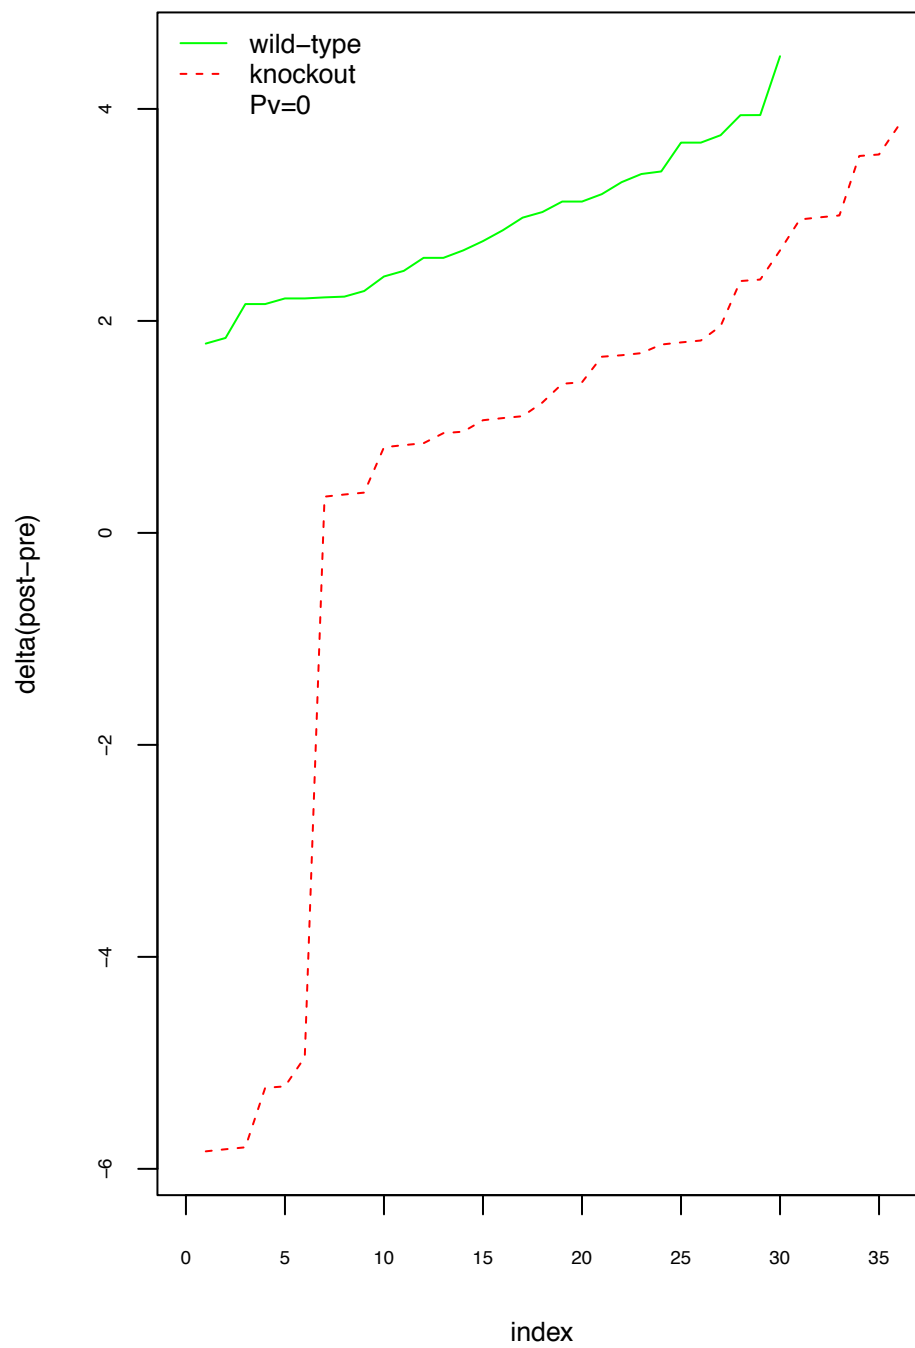

### Grem2

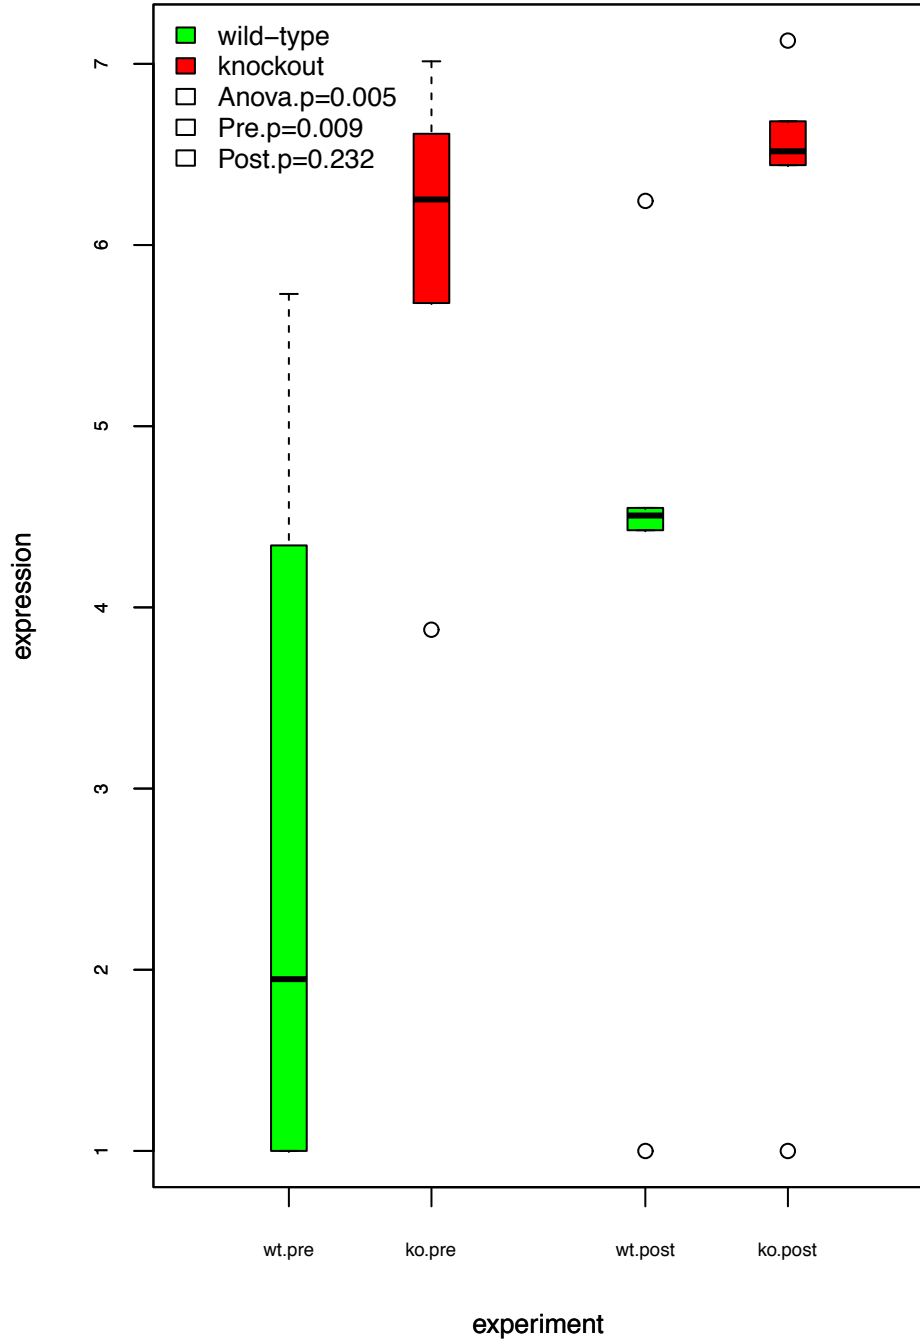

### Grem2

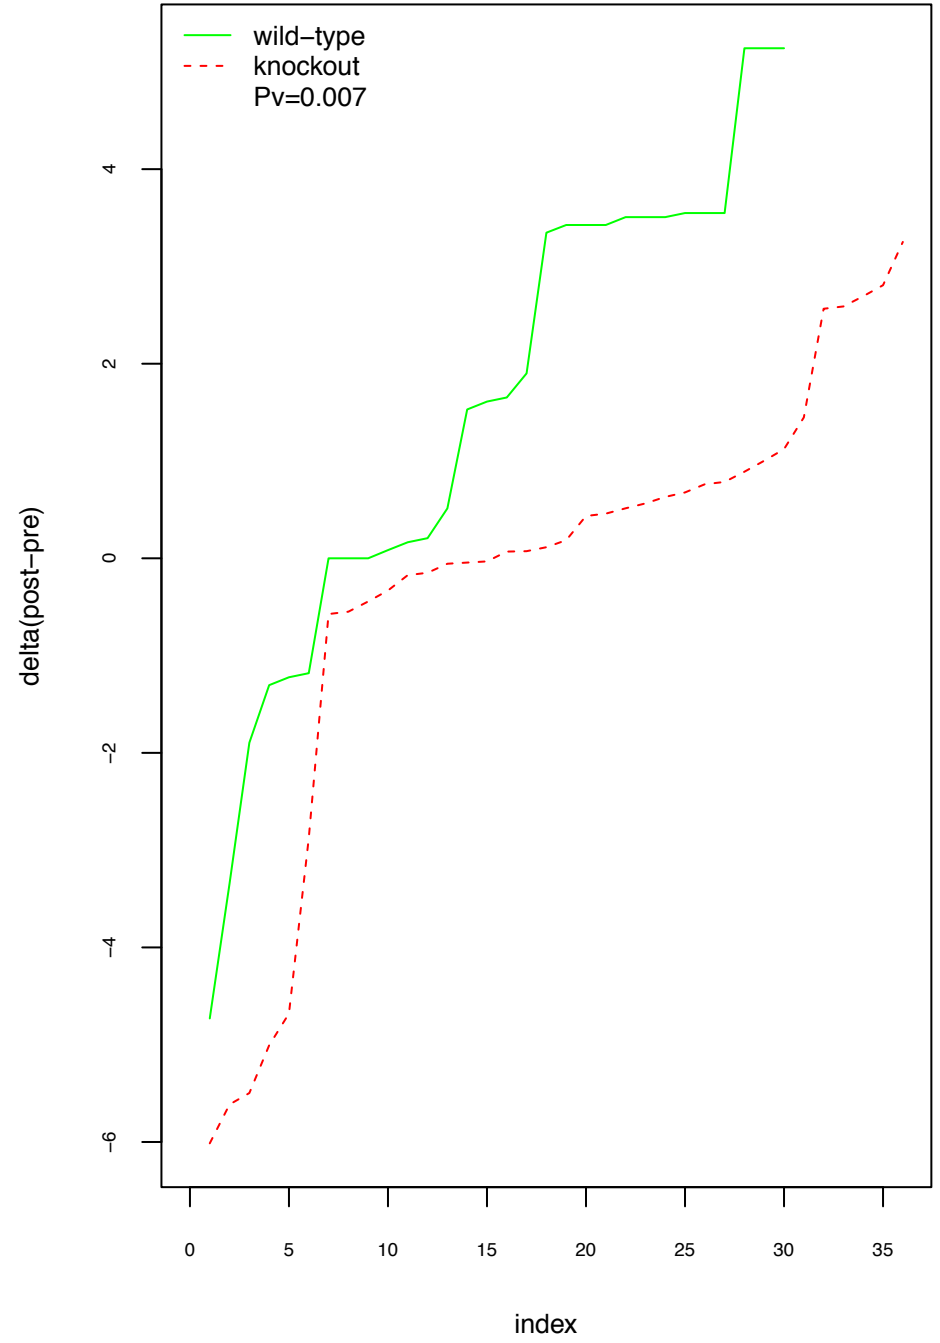

## Grem1

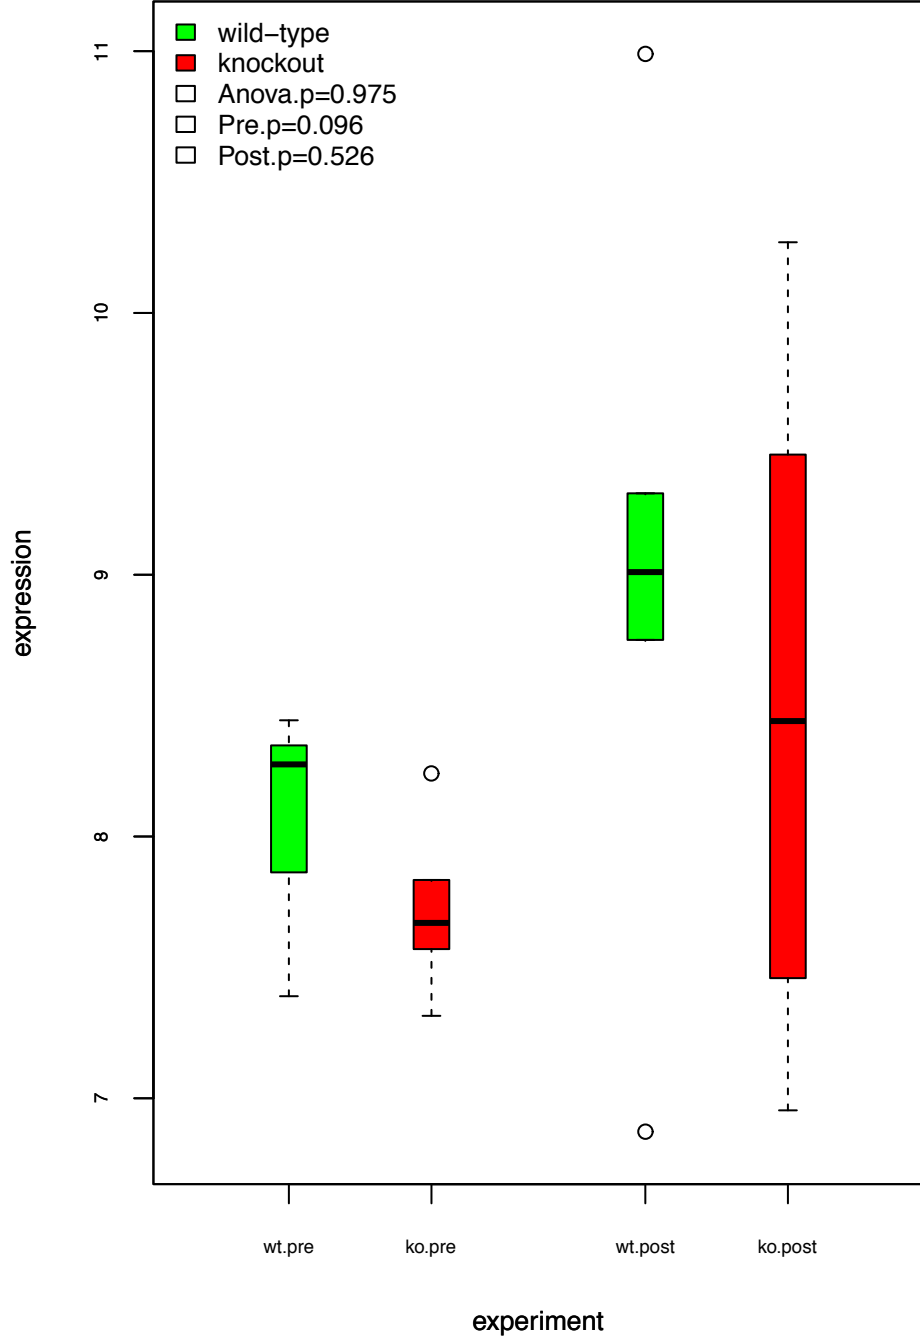

## Grem1

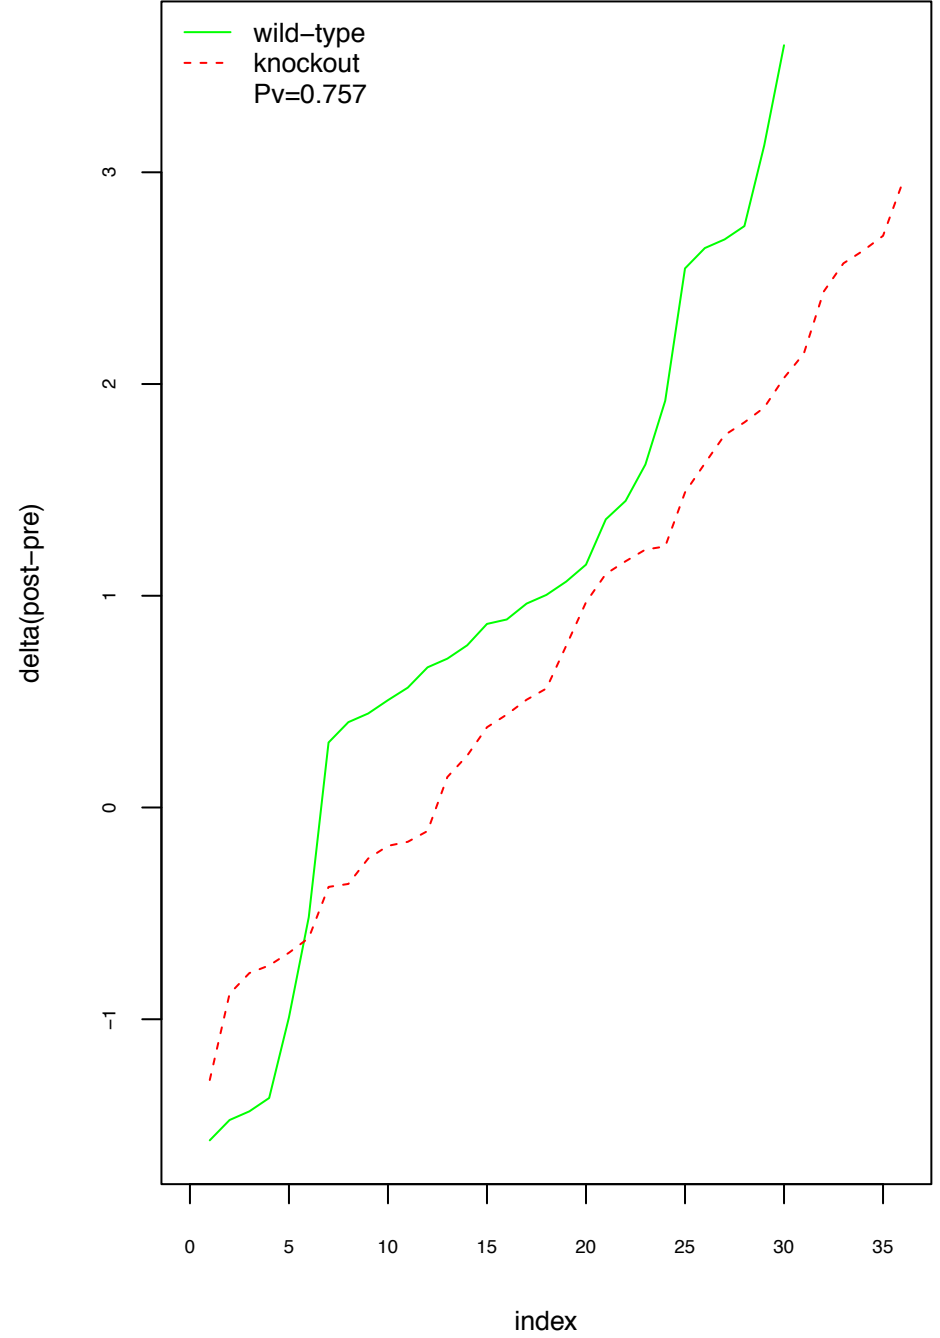

# Gli2

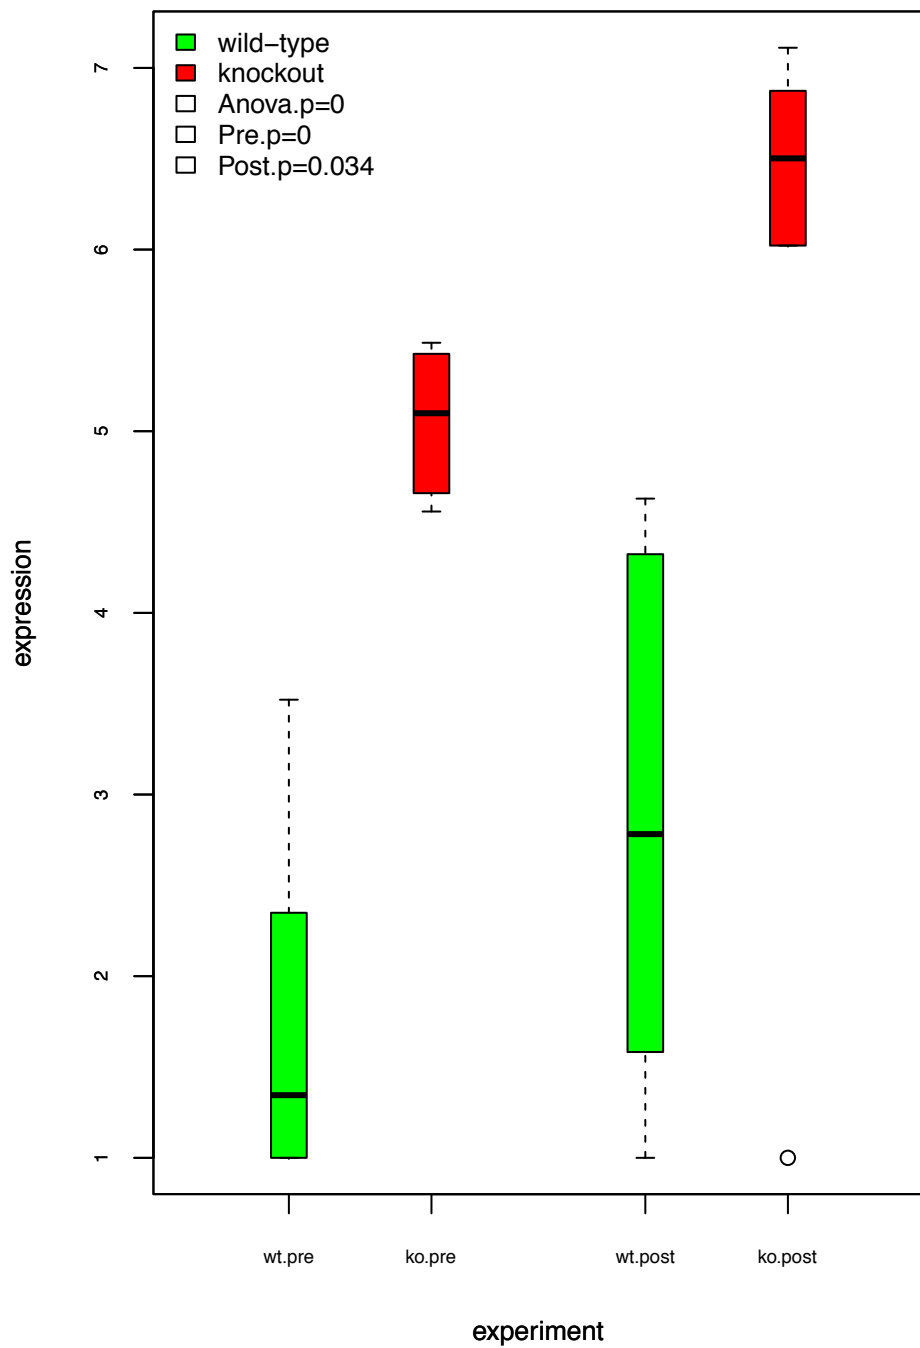

# Gli2

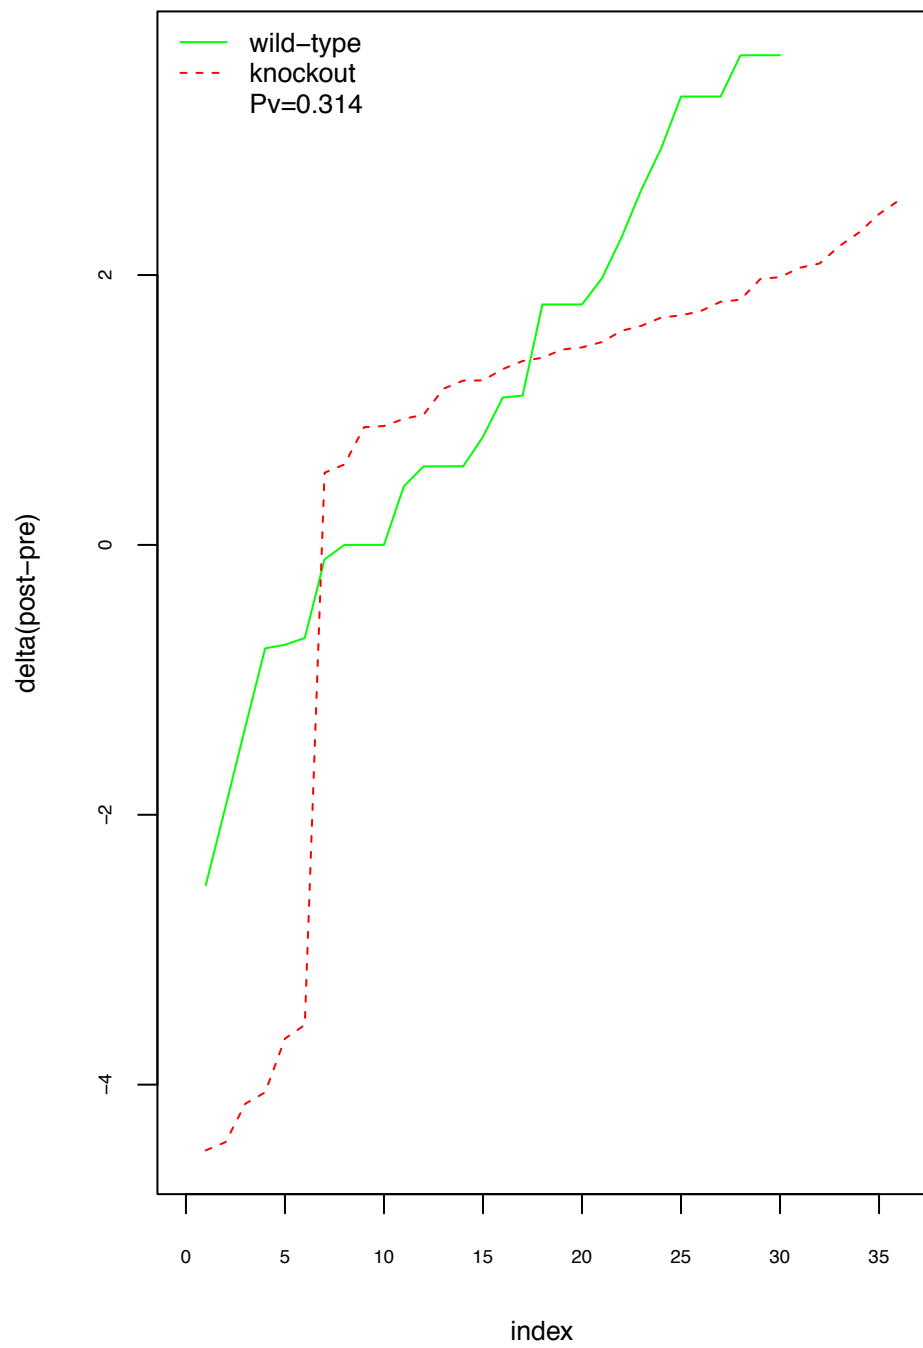

# Gli1

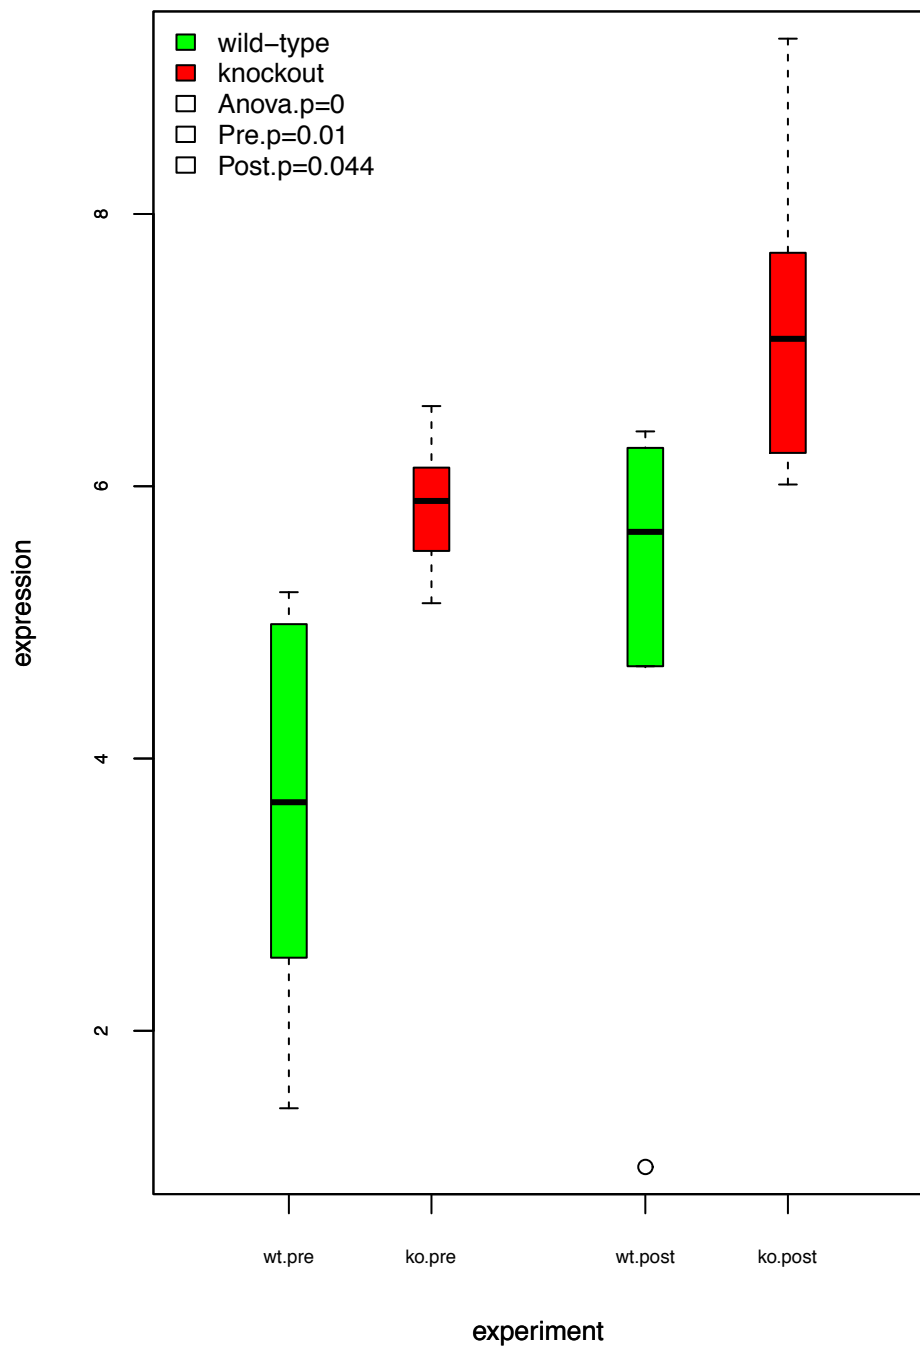

# Gli1

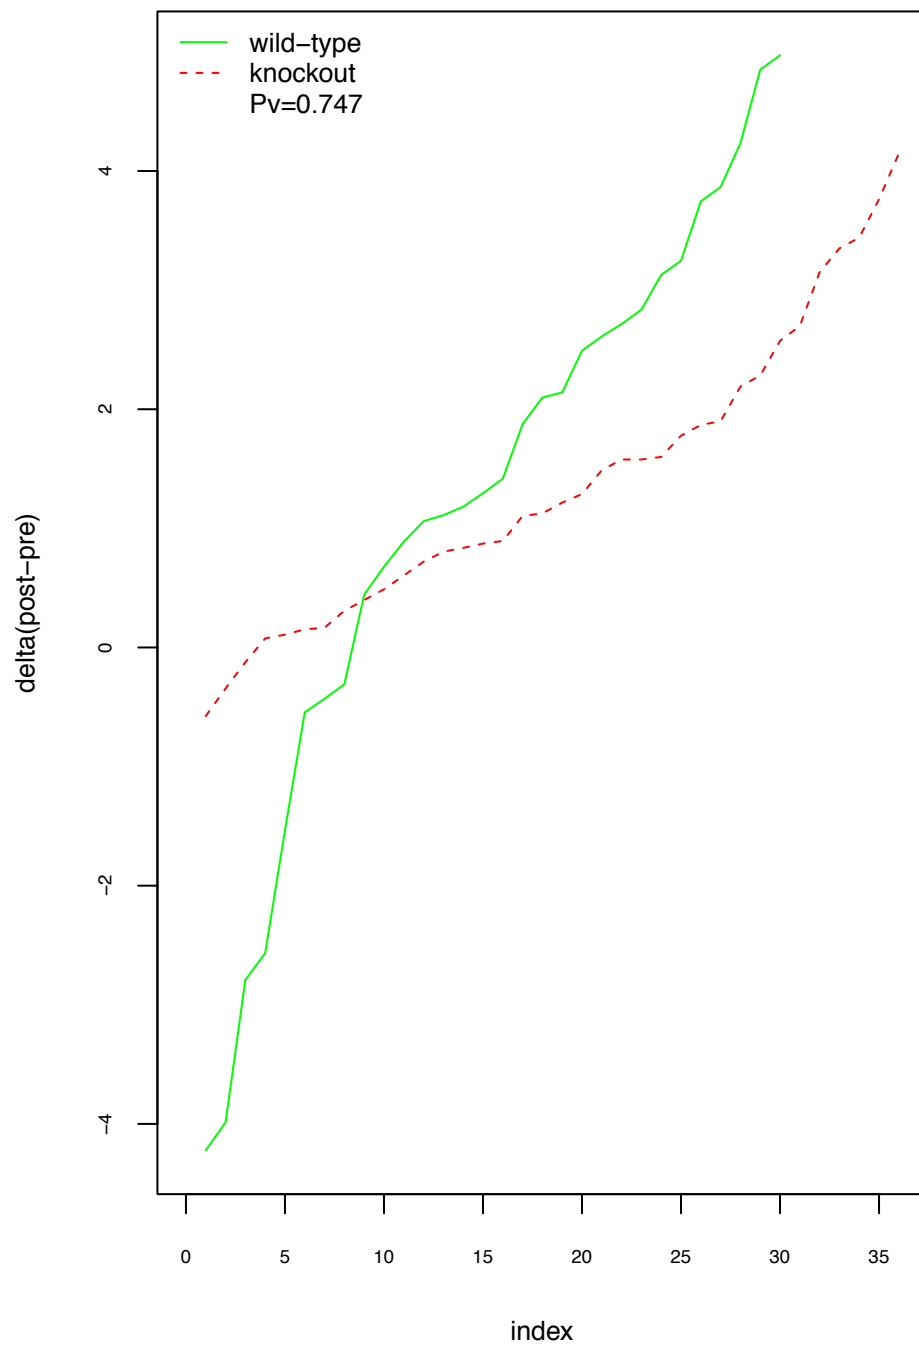



# Ghr

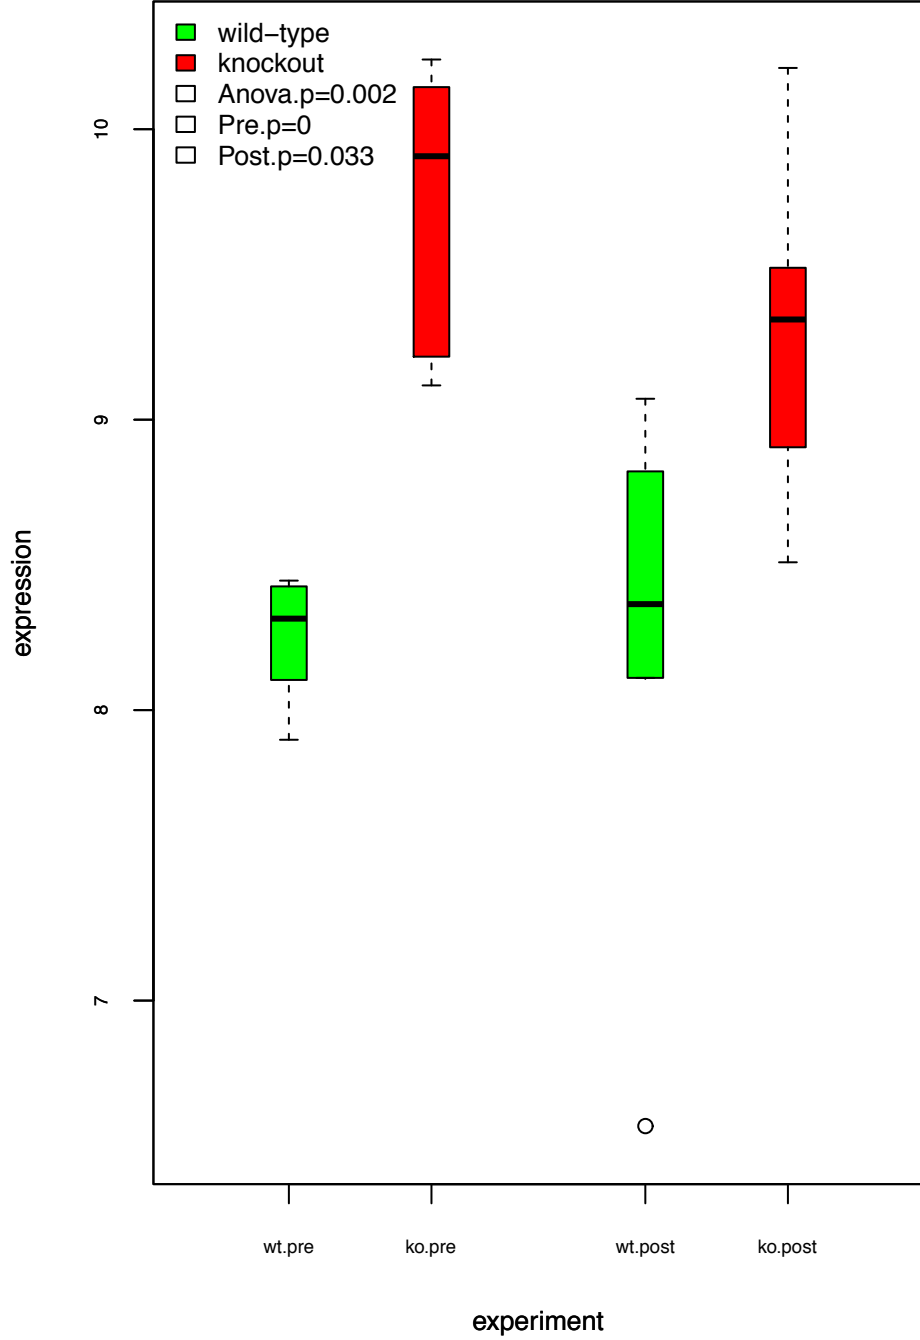

# Ghr

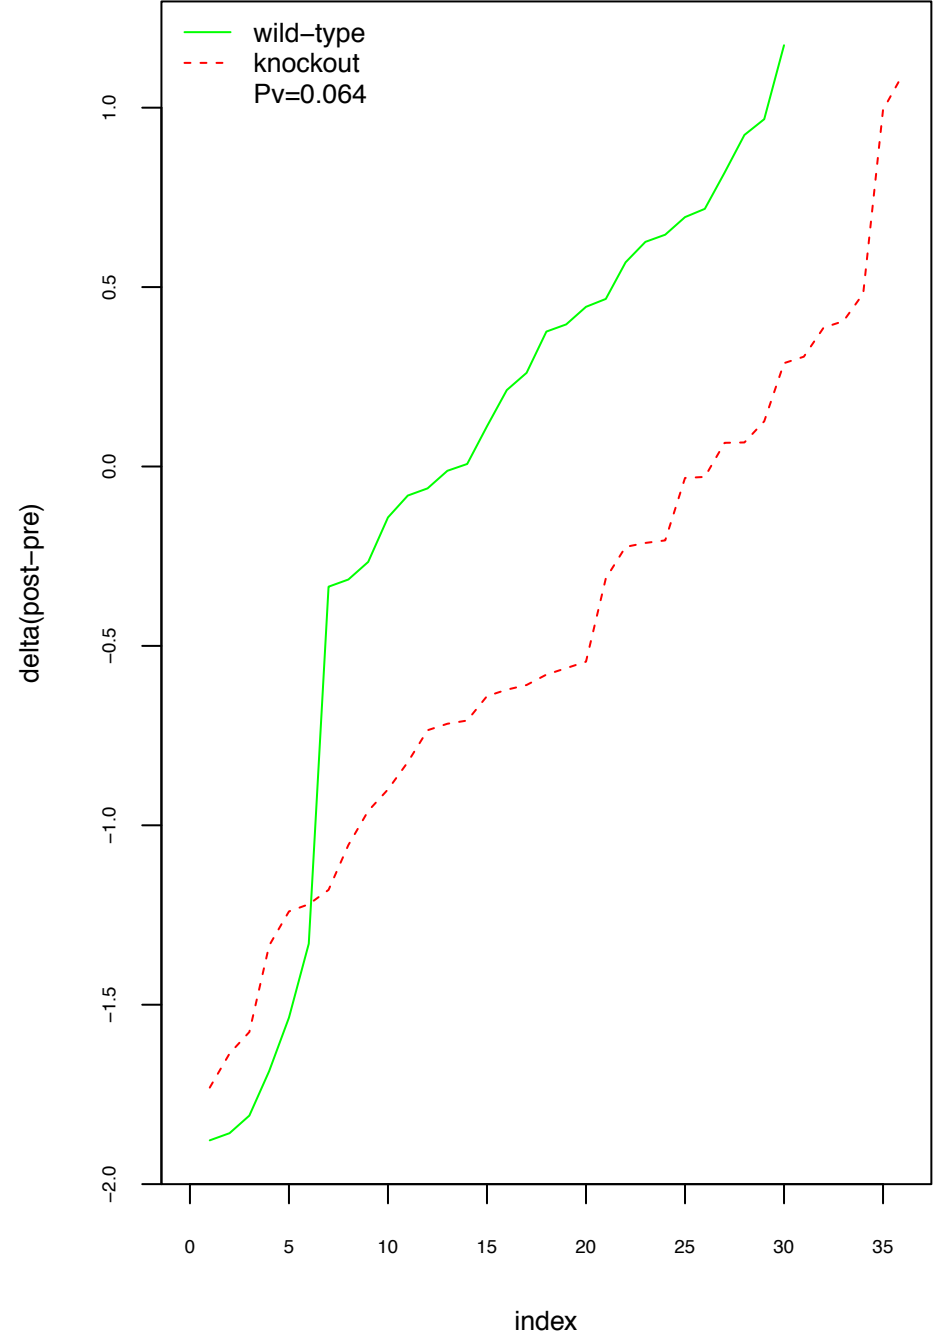

### Gdf6

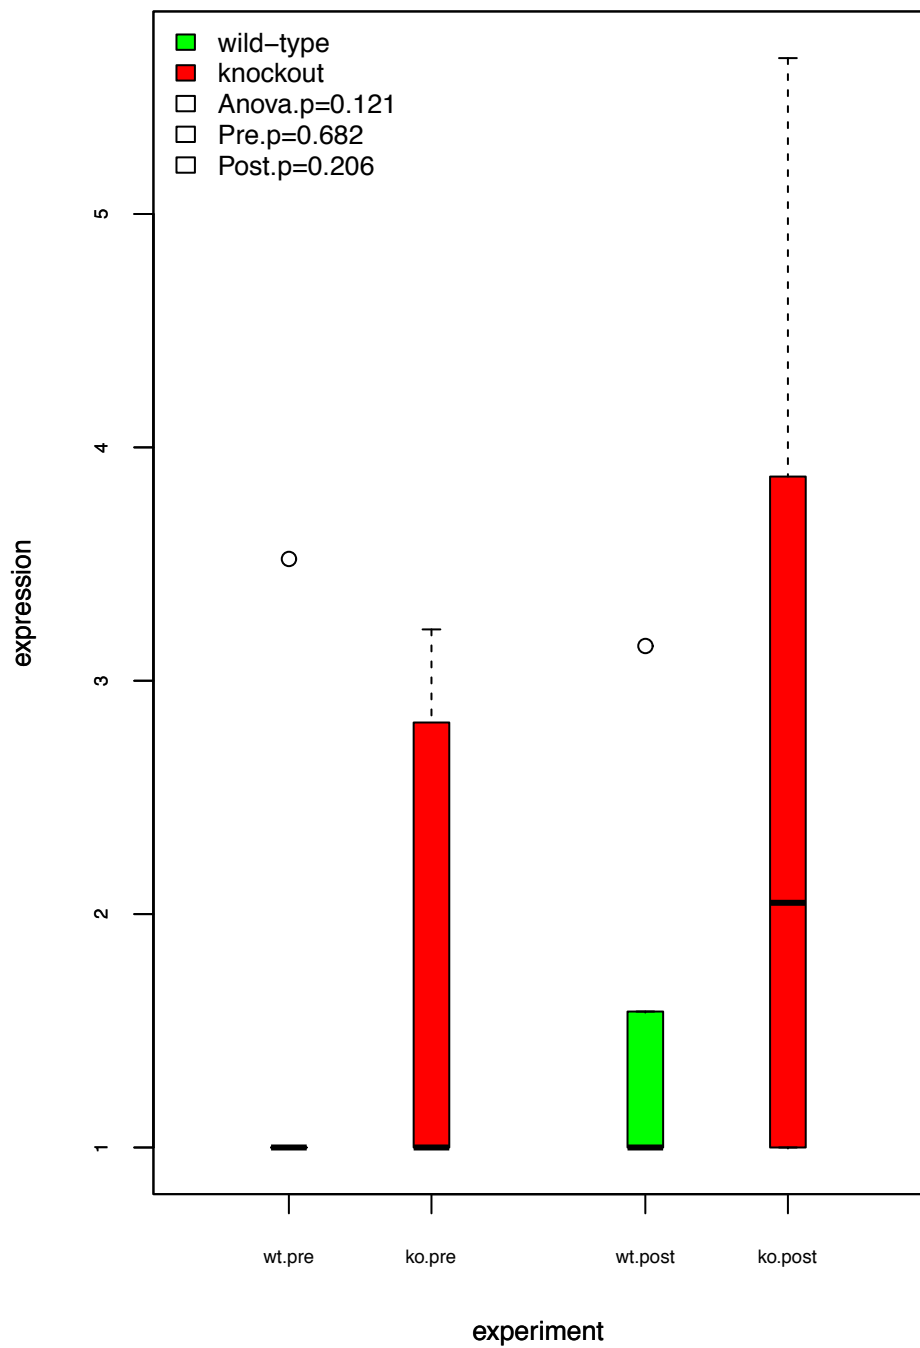

### Gdf6

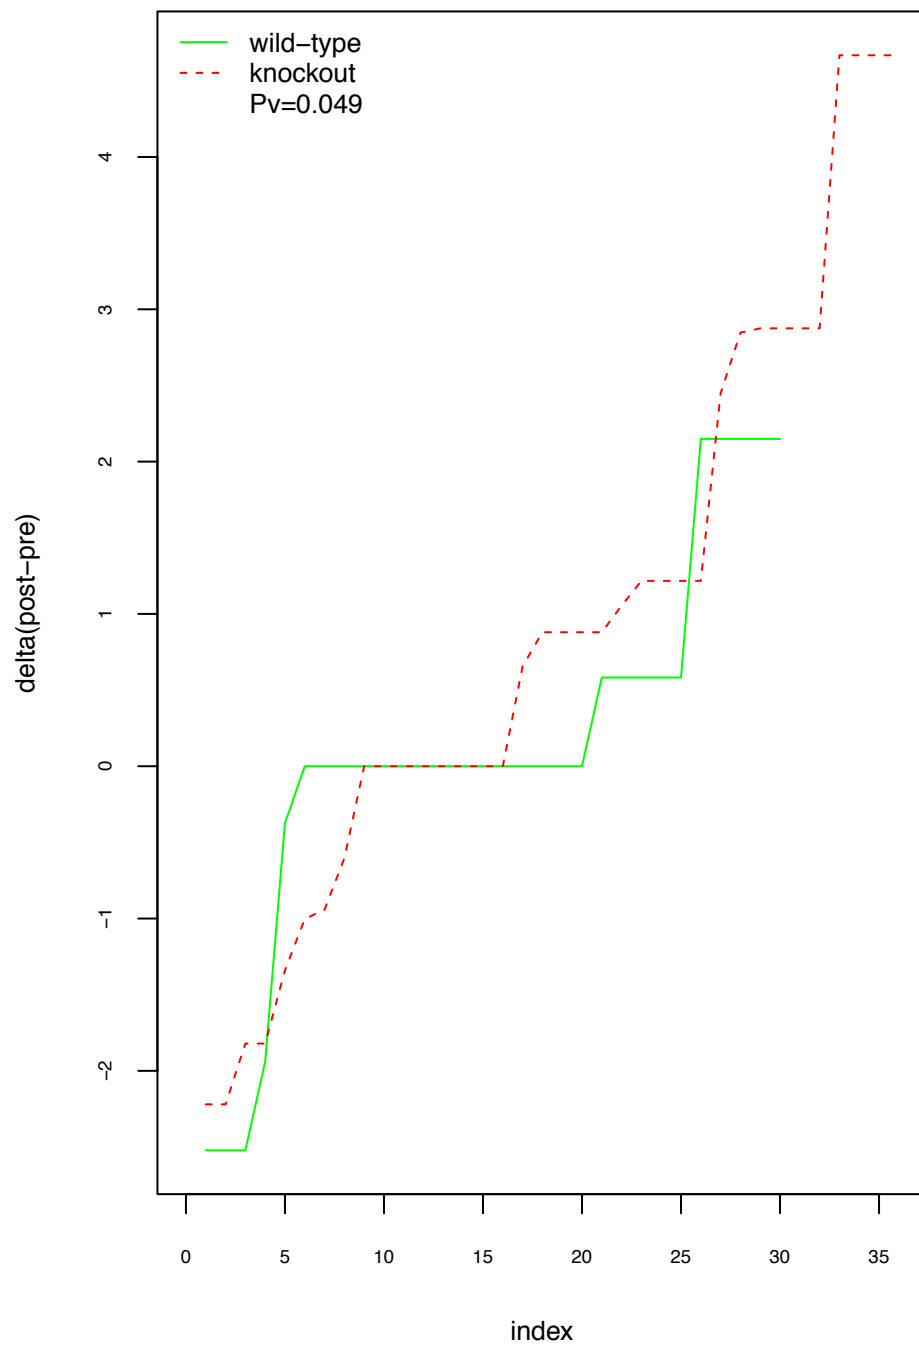

### Gdf5

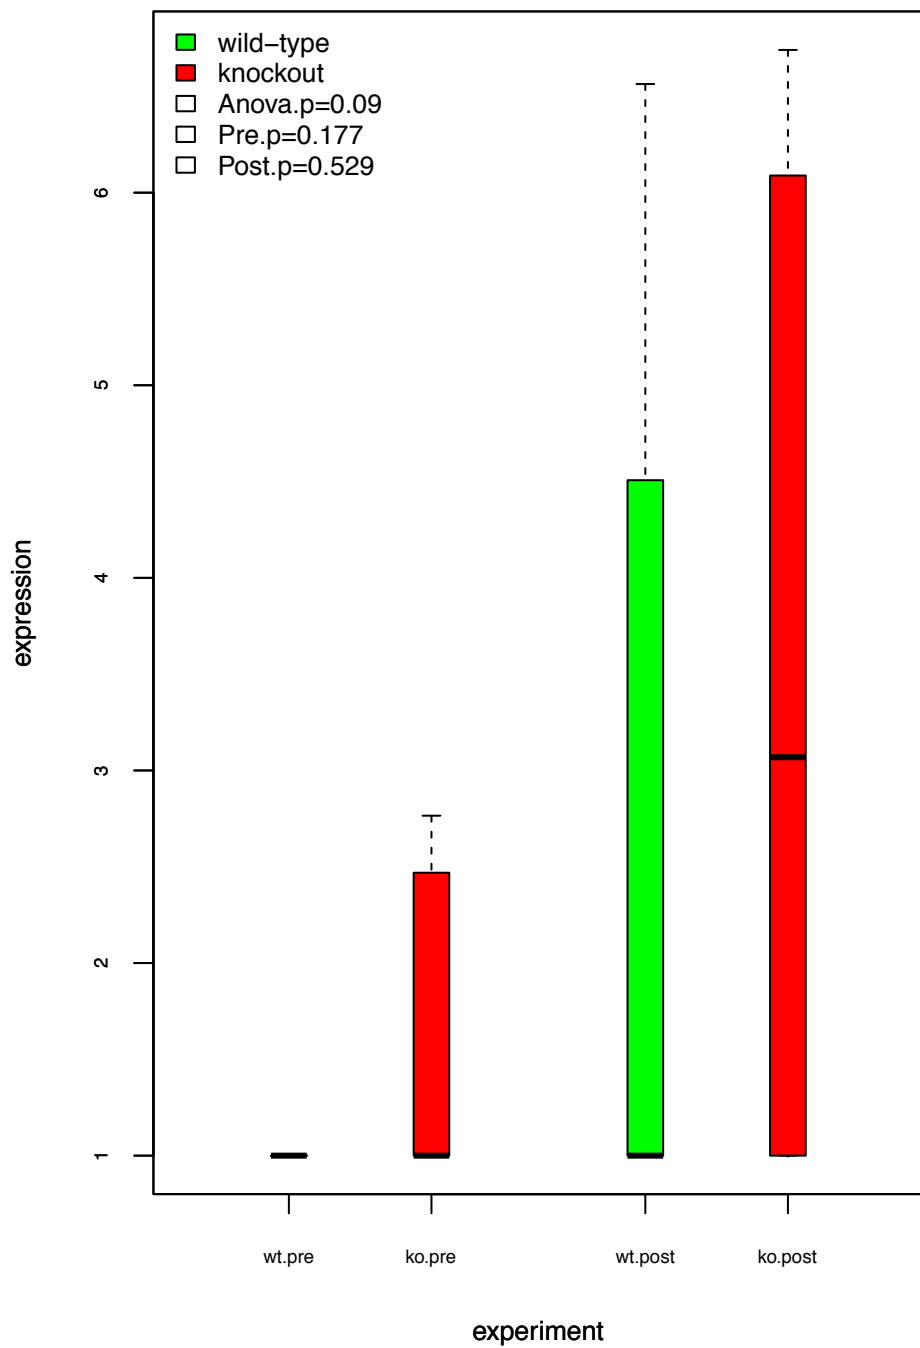

### Gdf5

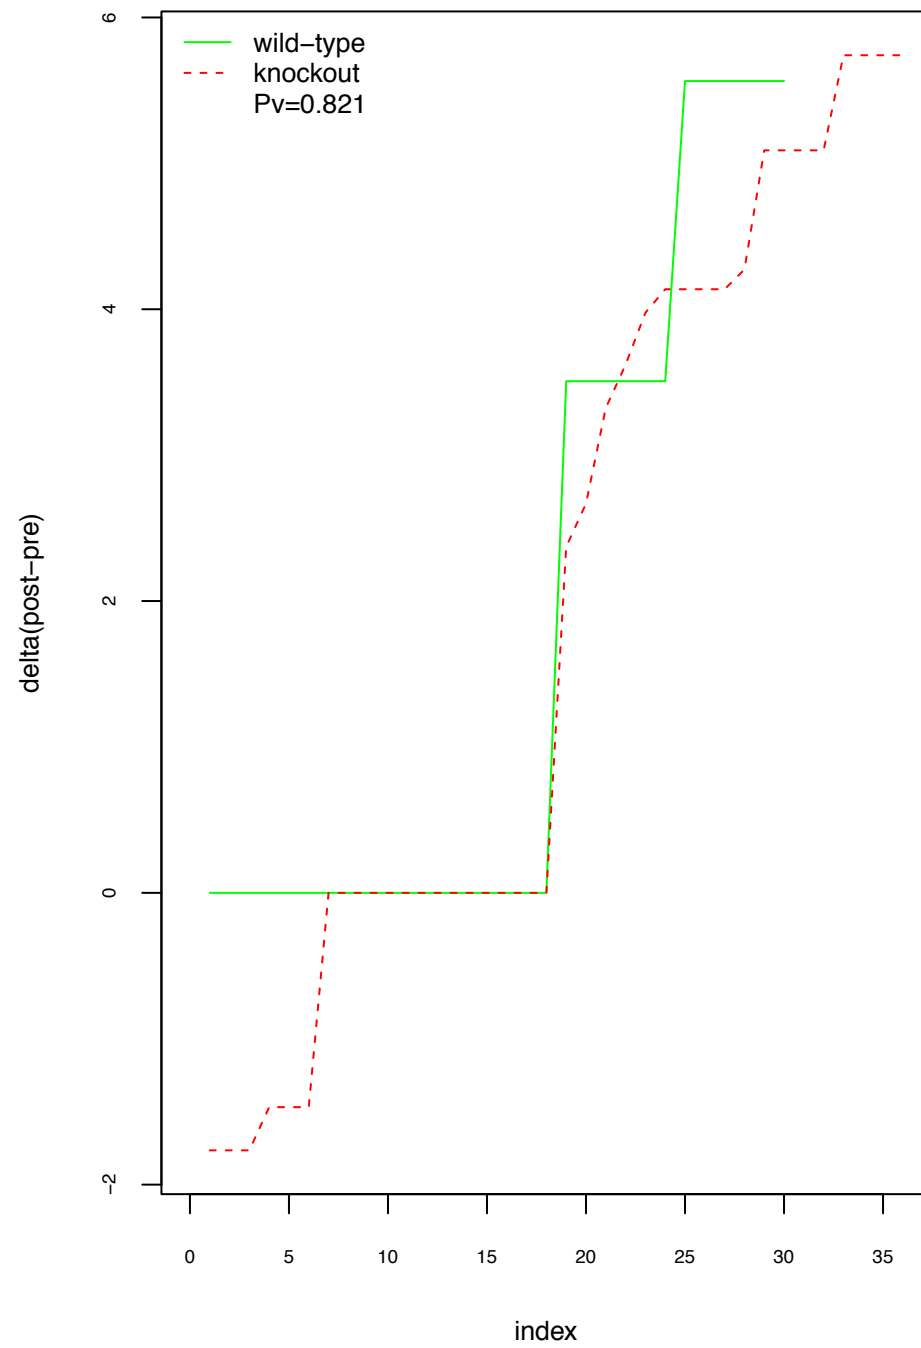

### Gata2

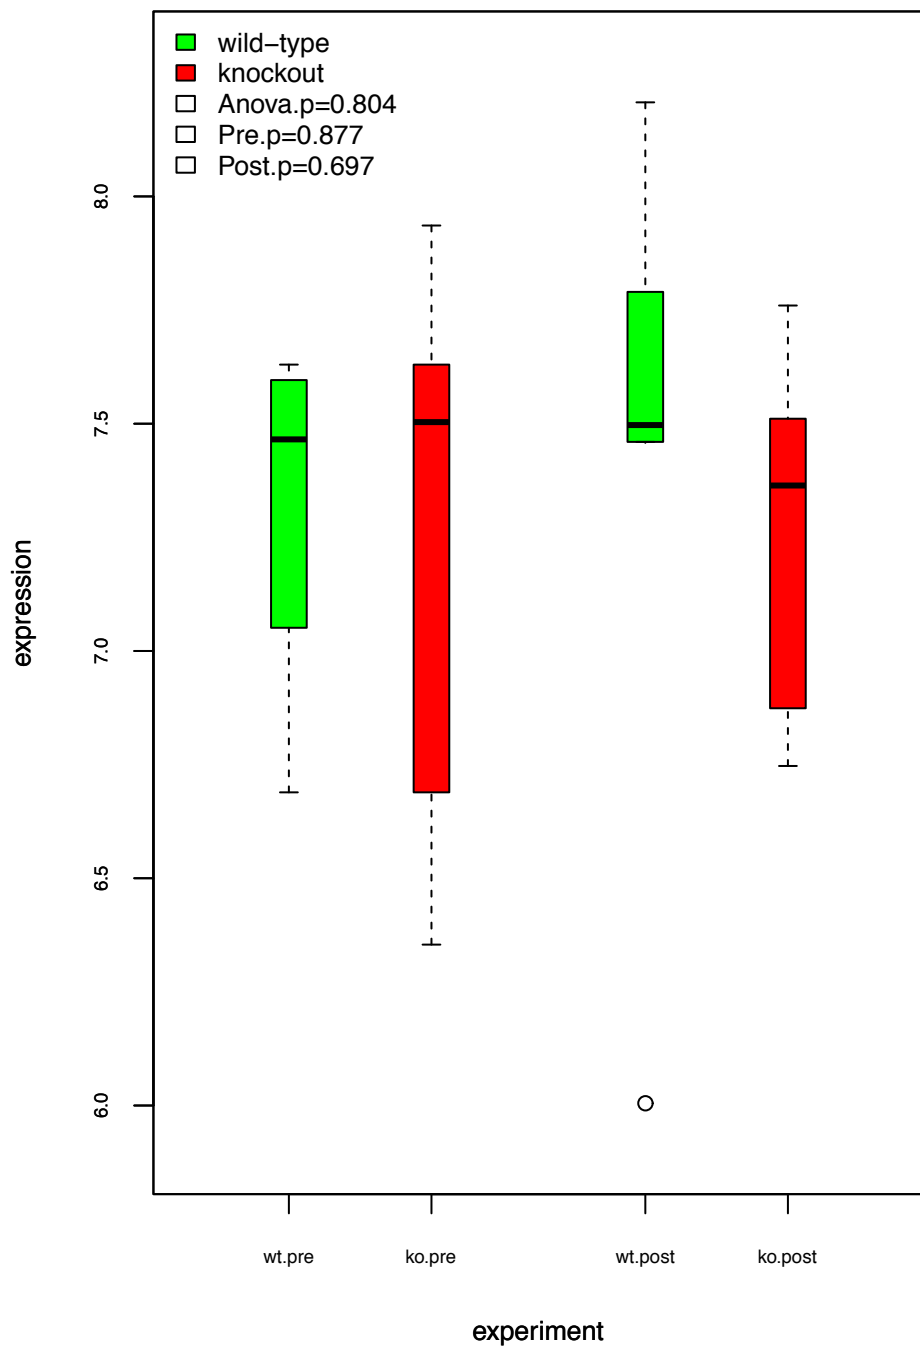

### Gata2

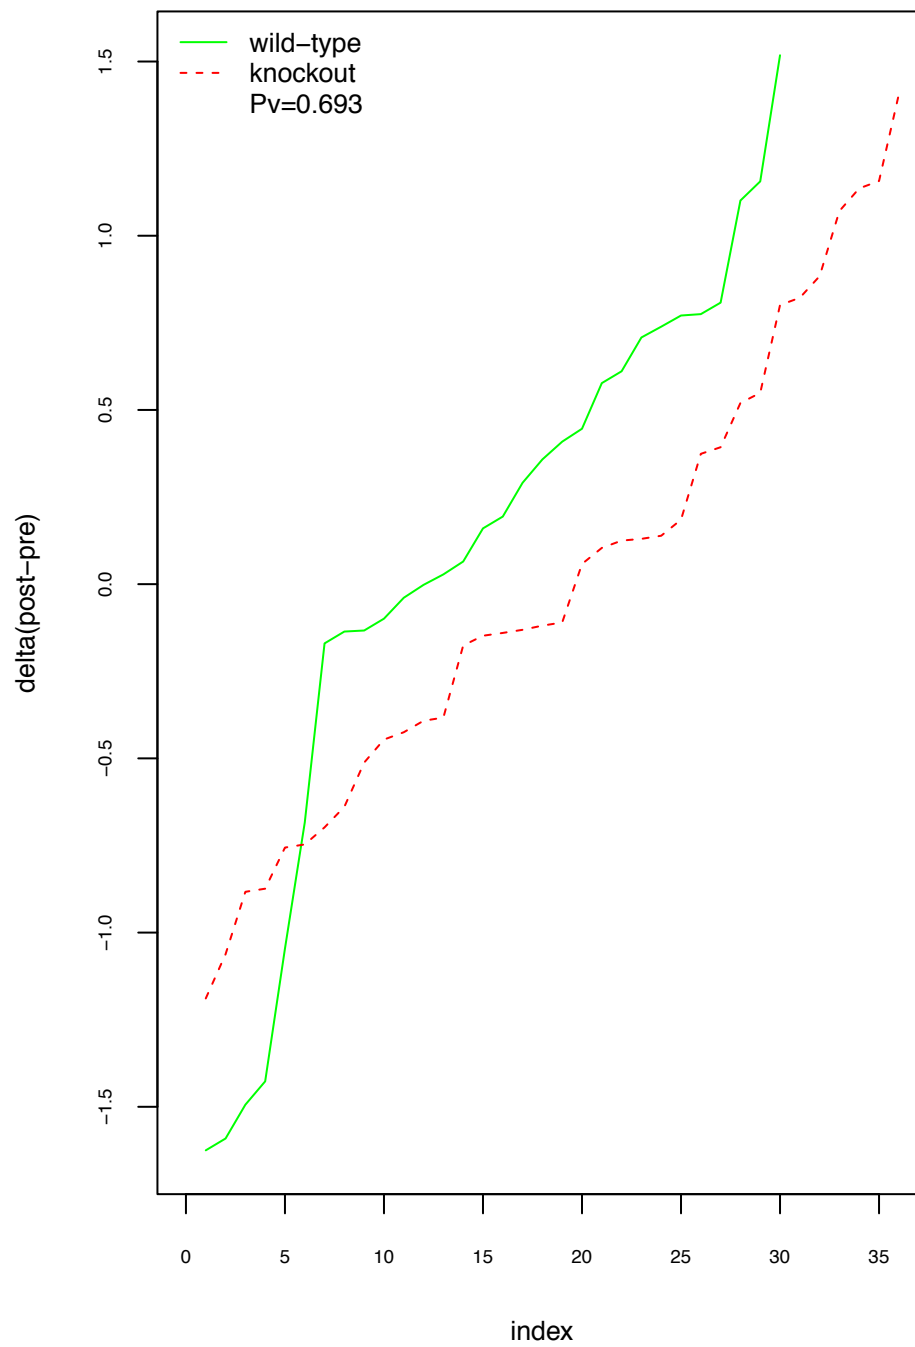

## Hnf1a

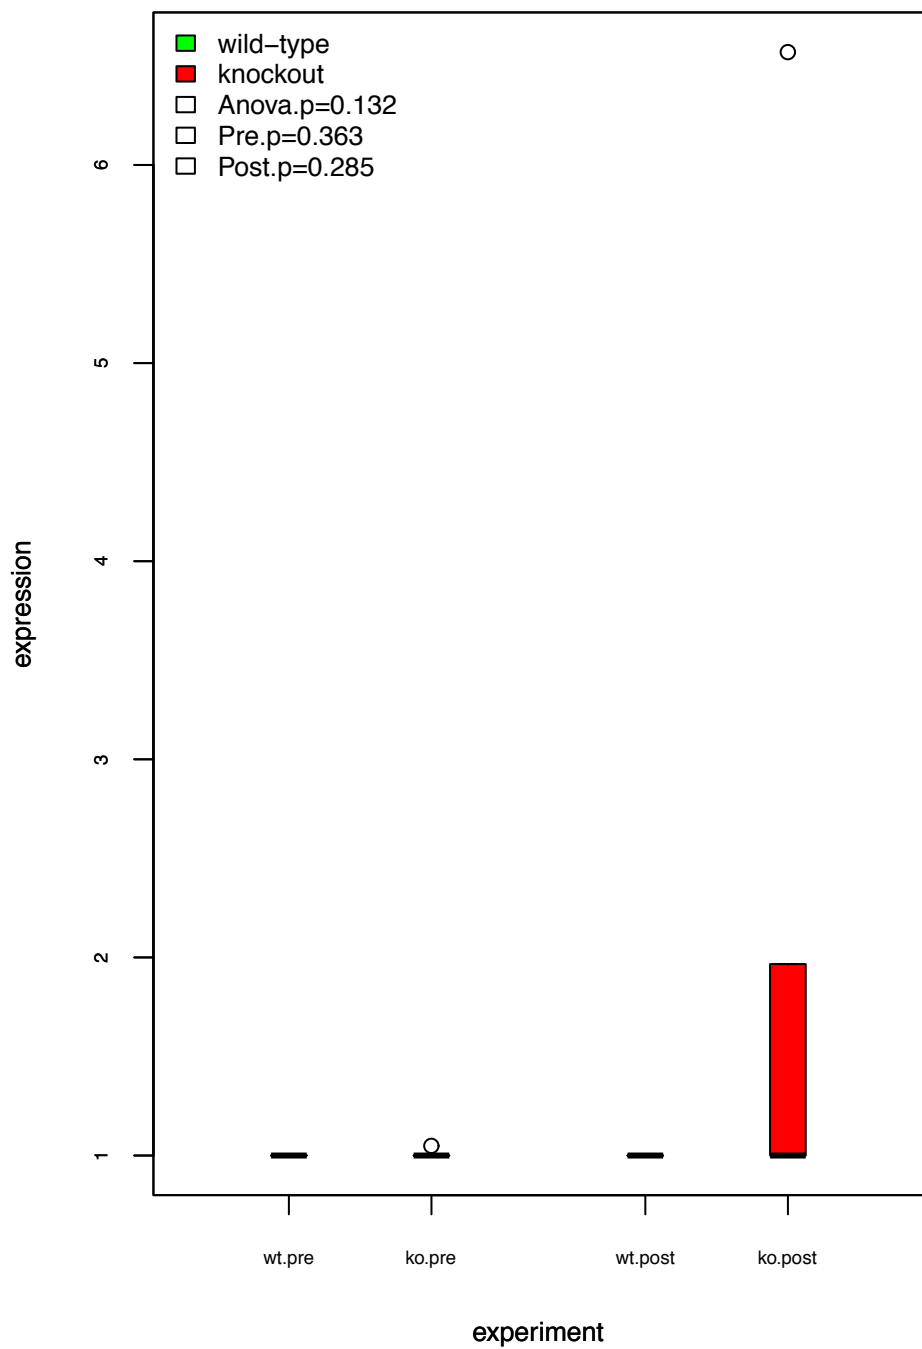

## Hnf1a

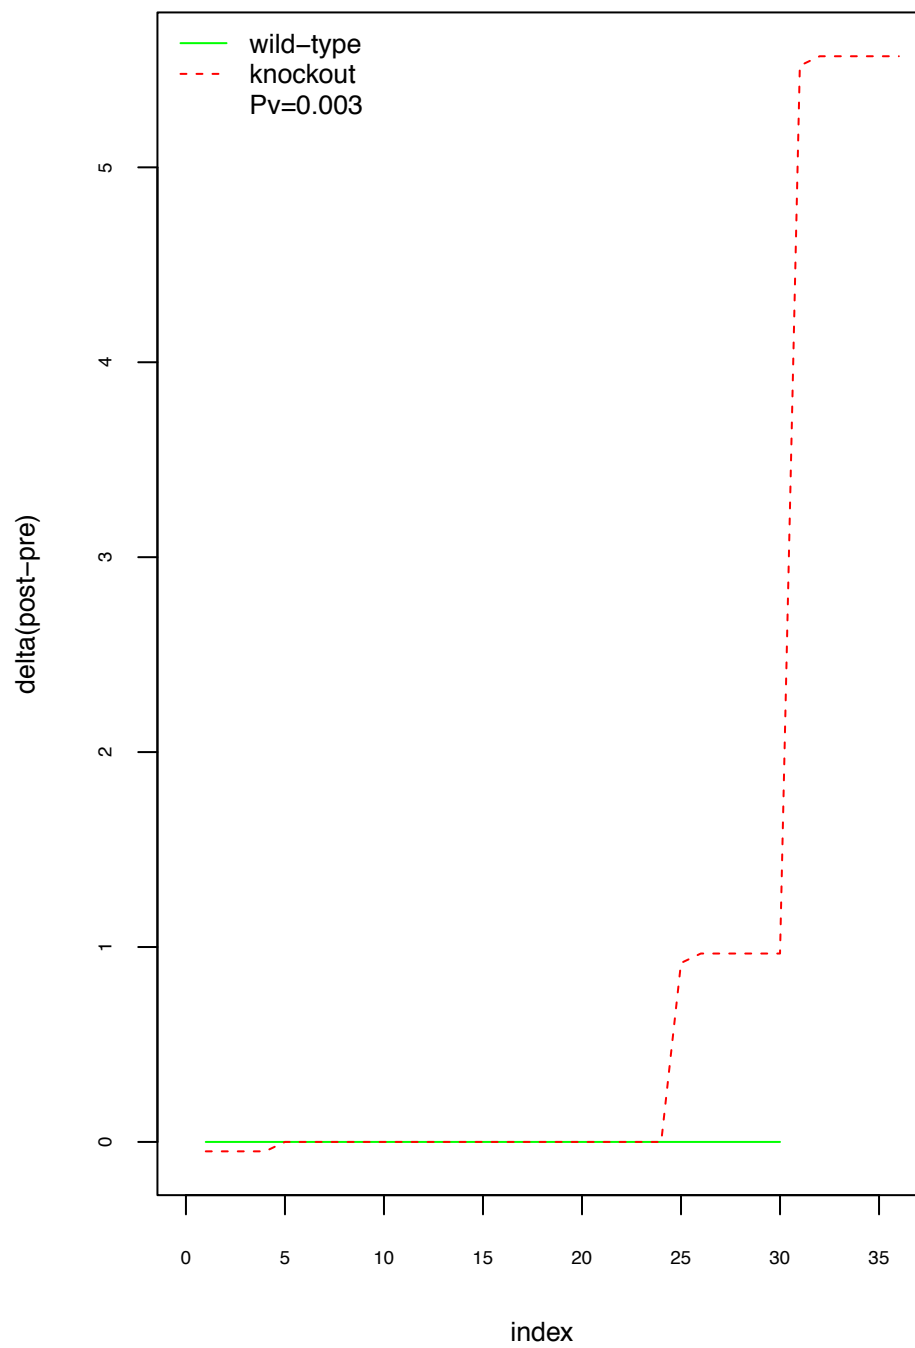

# Ihh

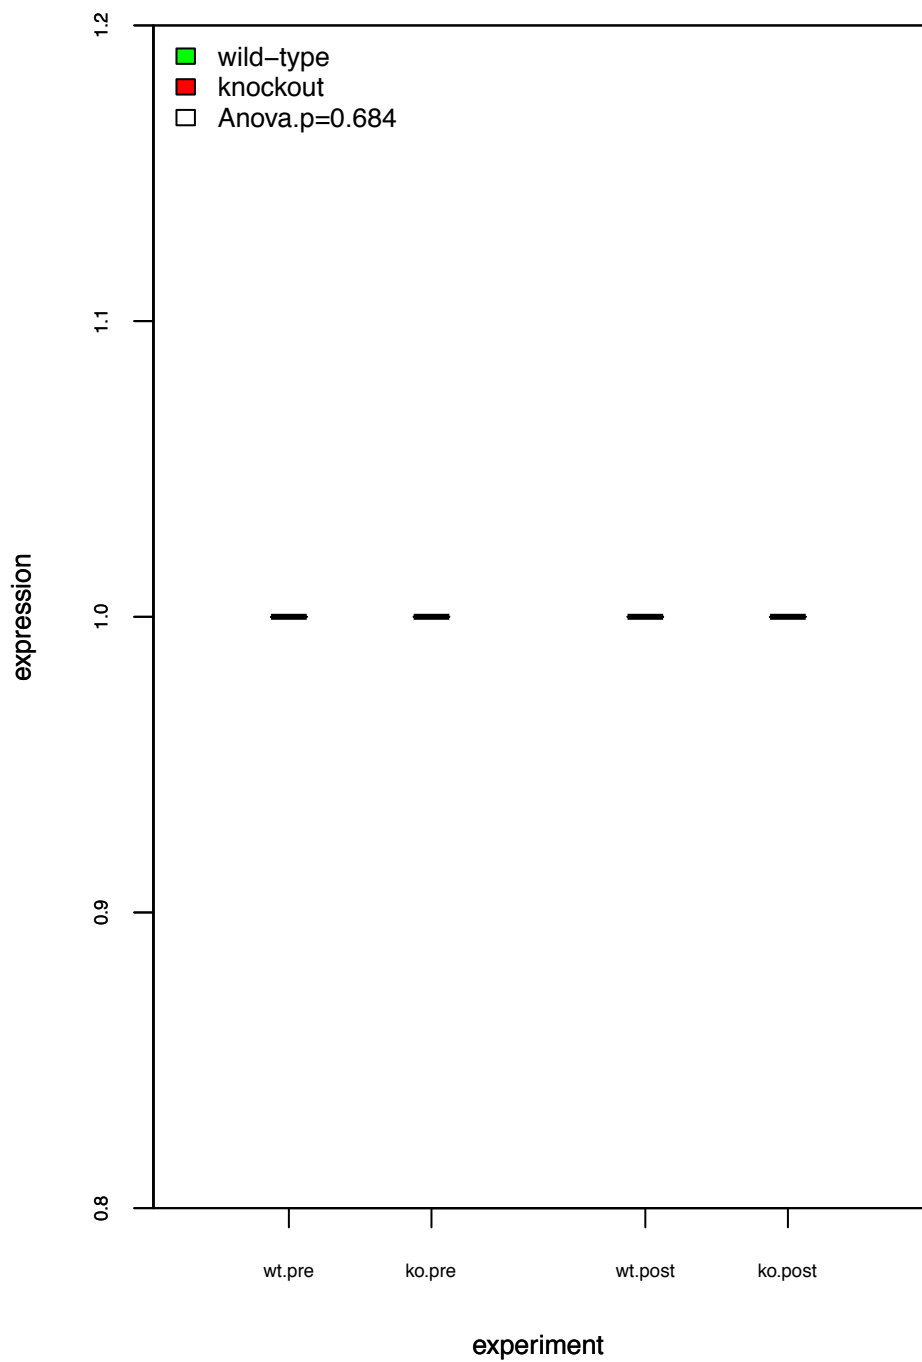

# Ihh

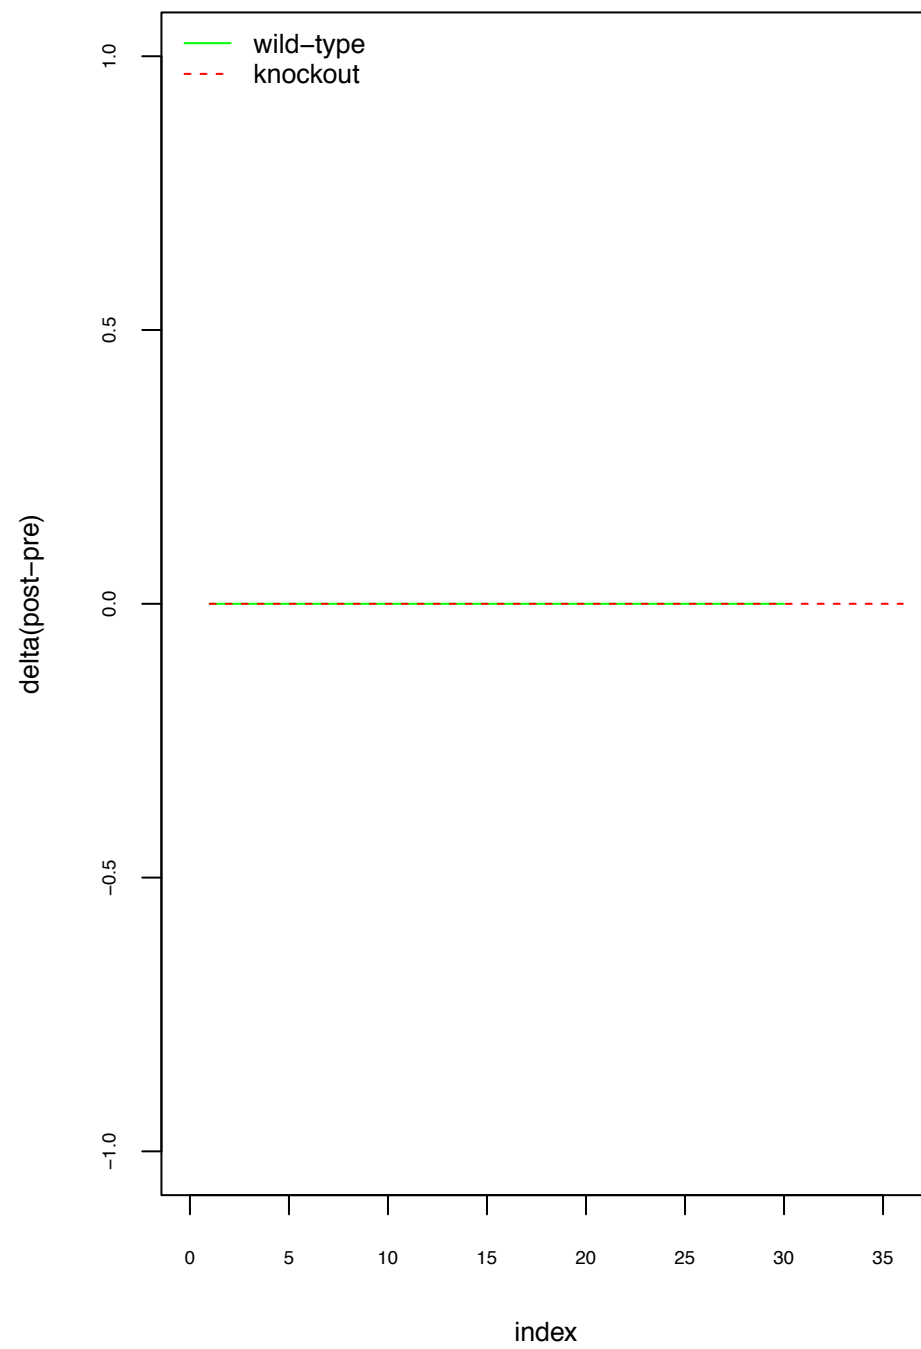

# Igf2r

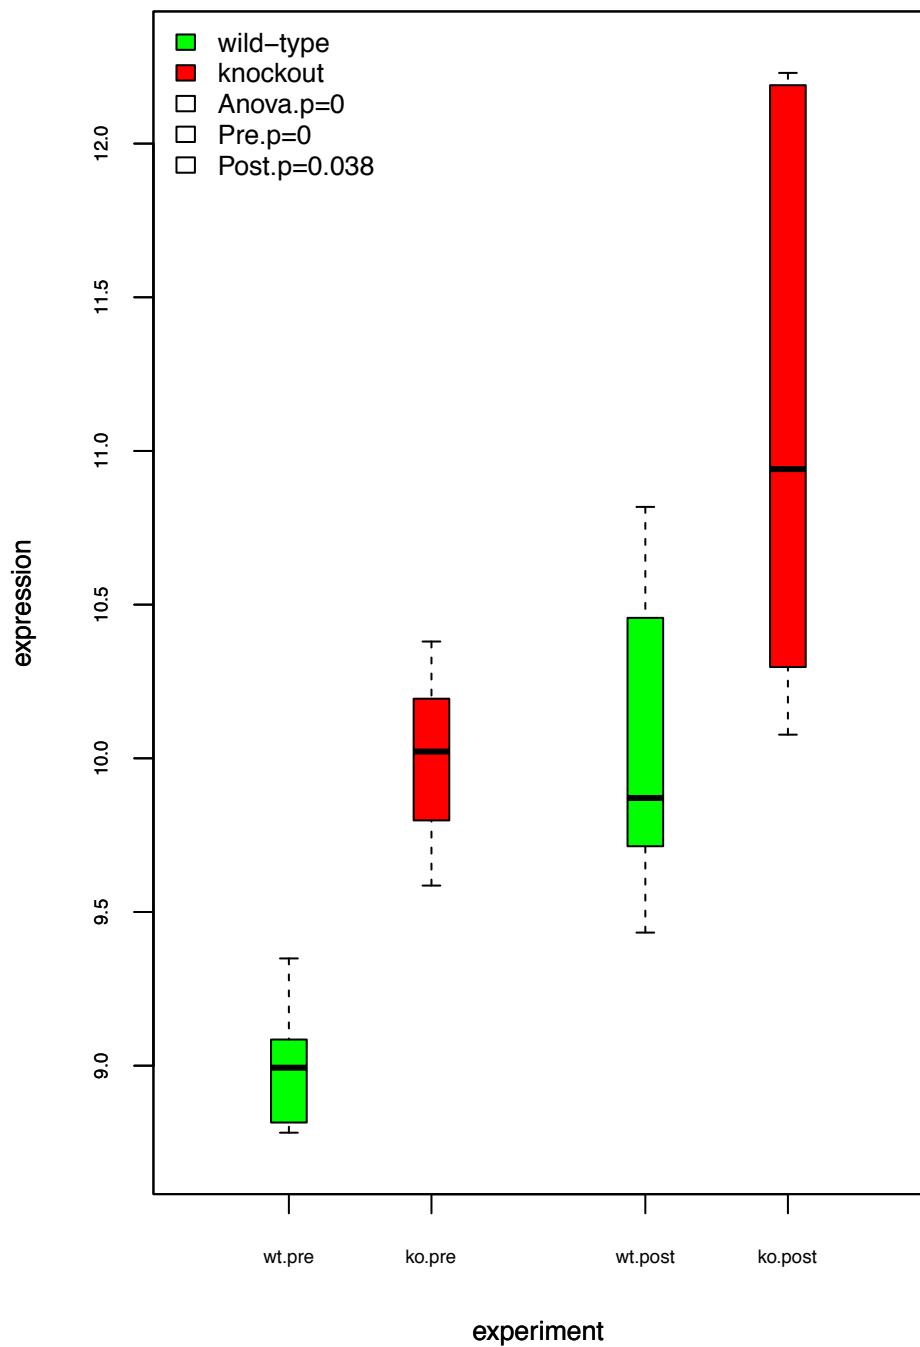

# Igf2r

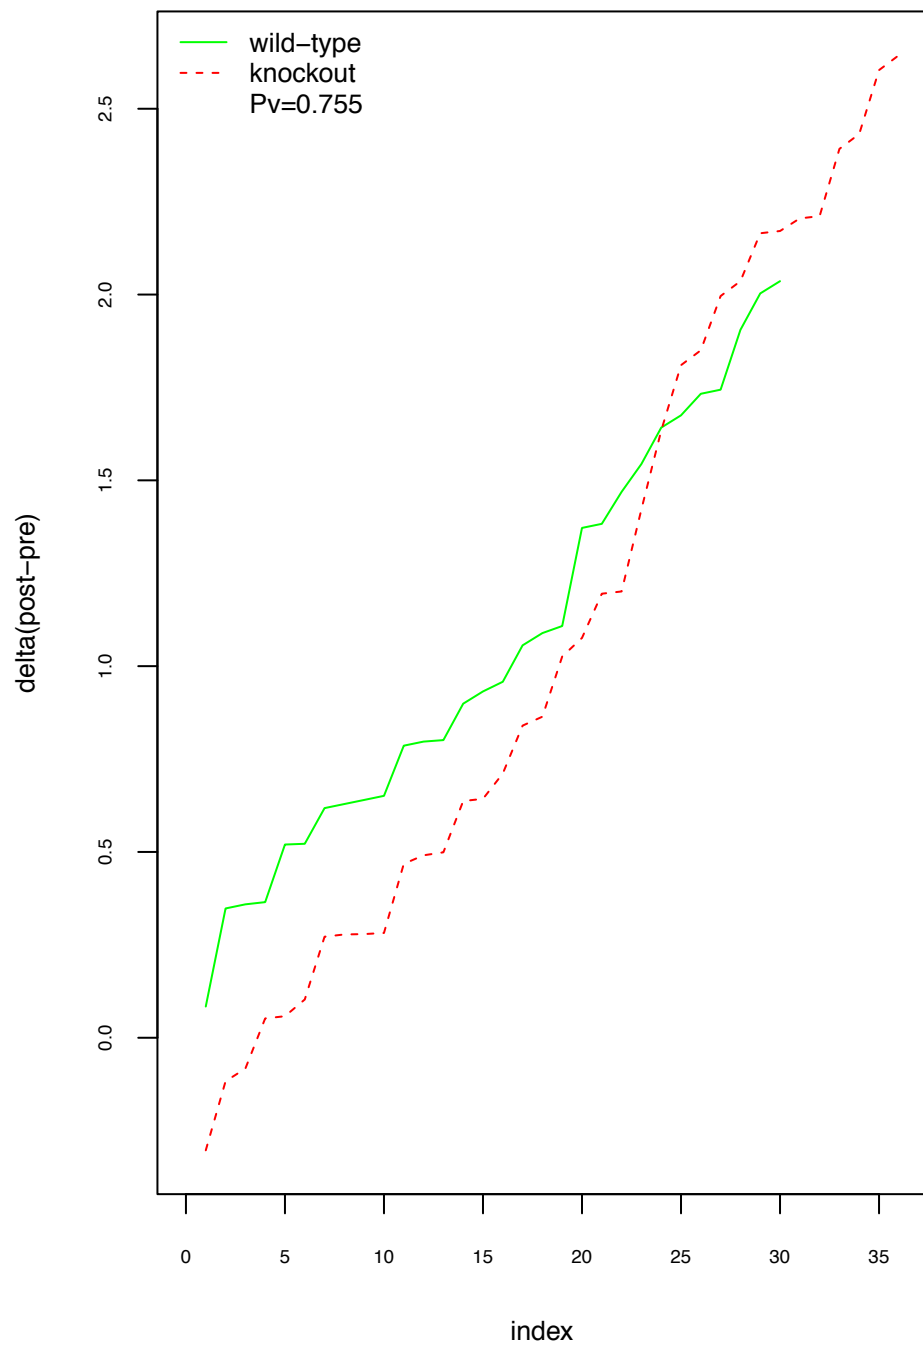

# Igf1r

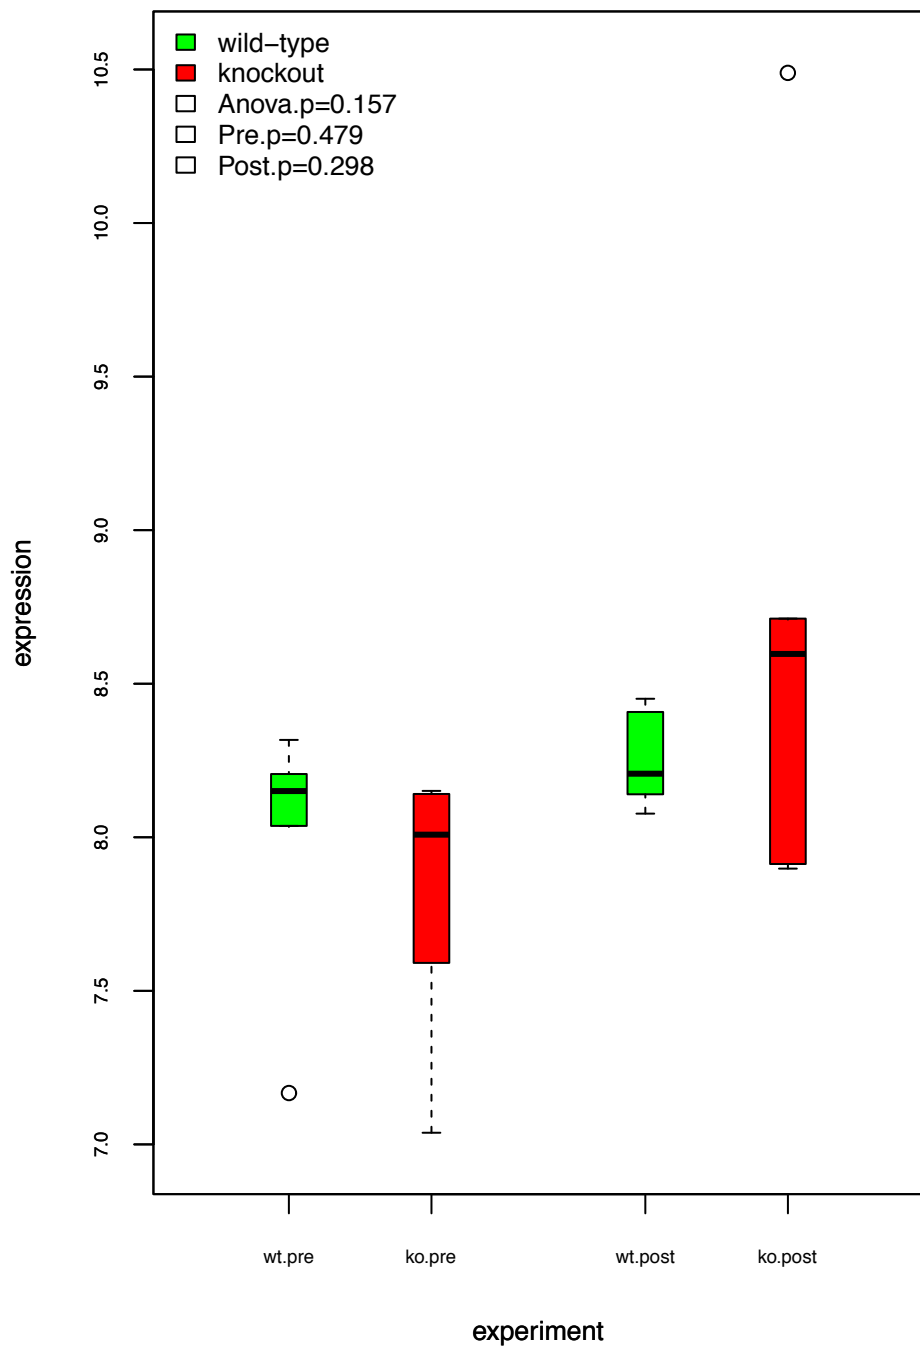

# Igf1r

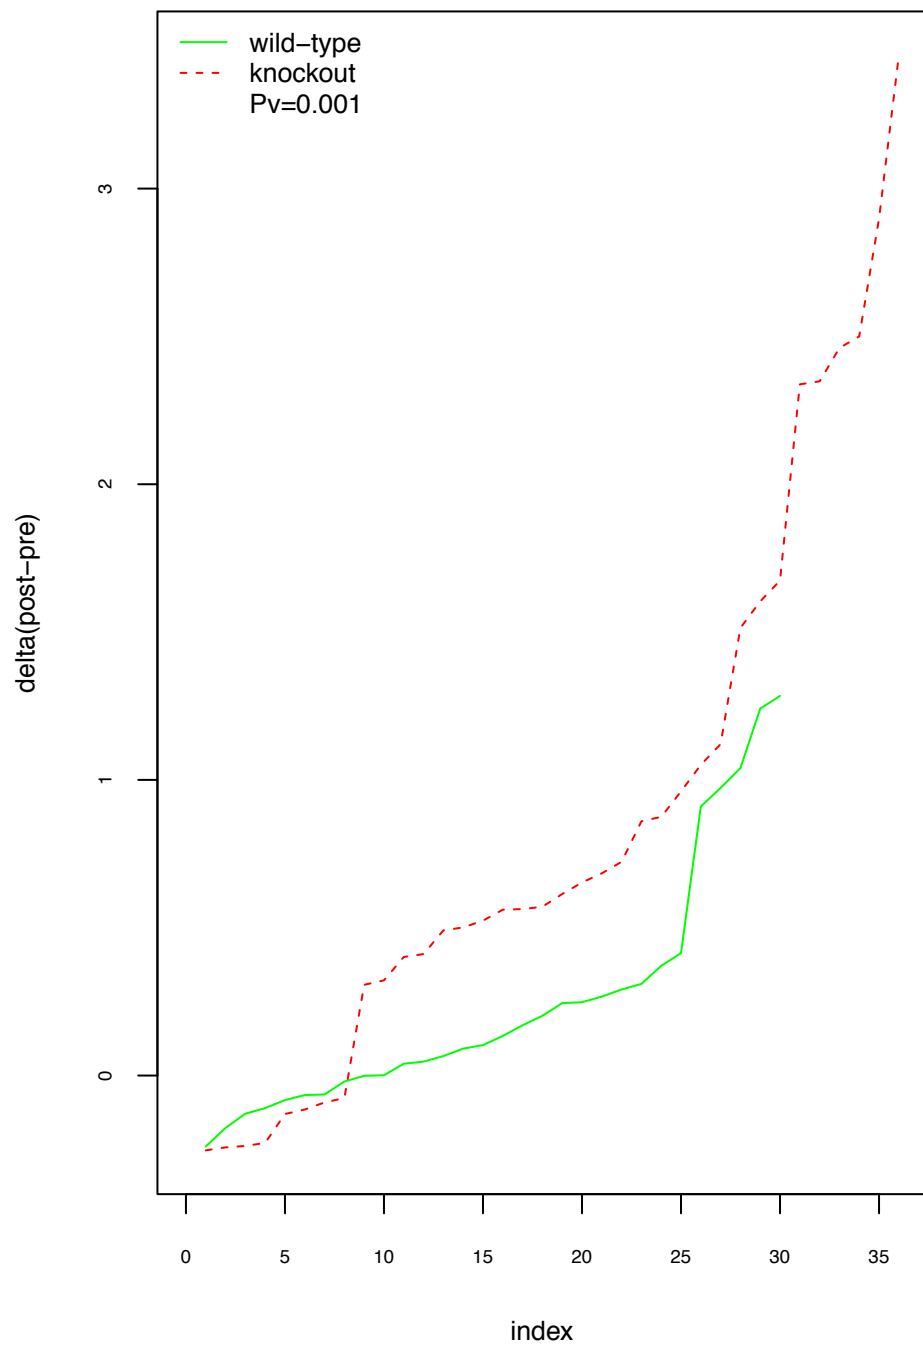



# Igf1

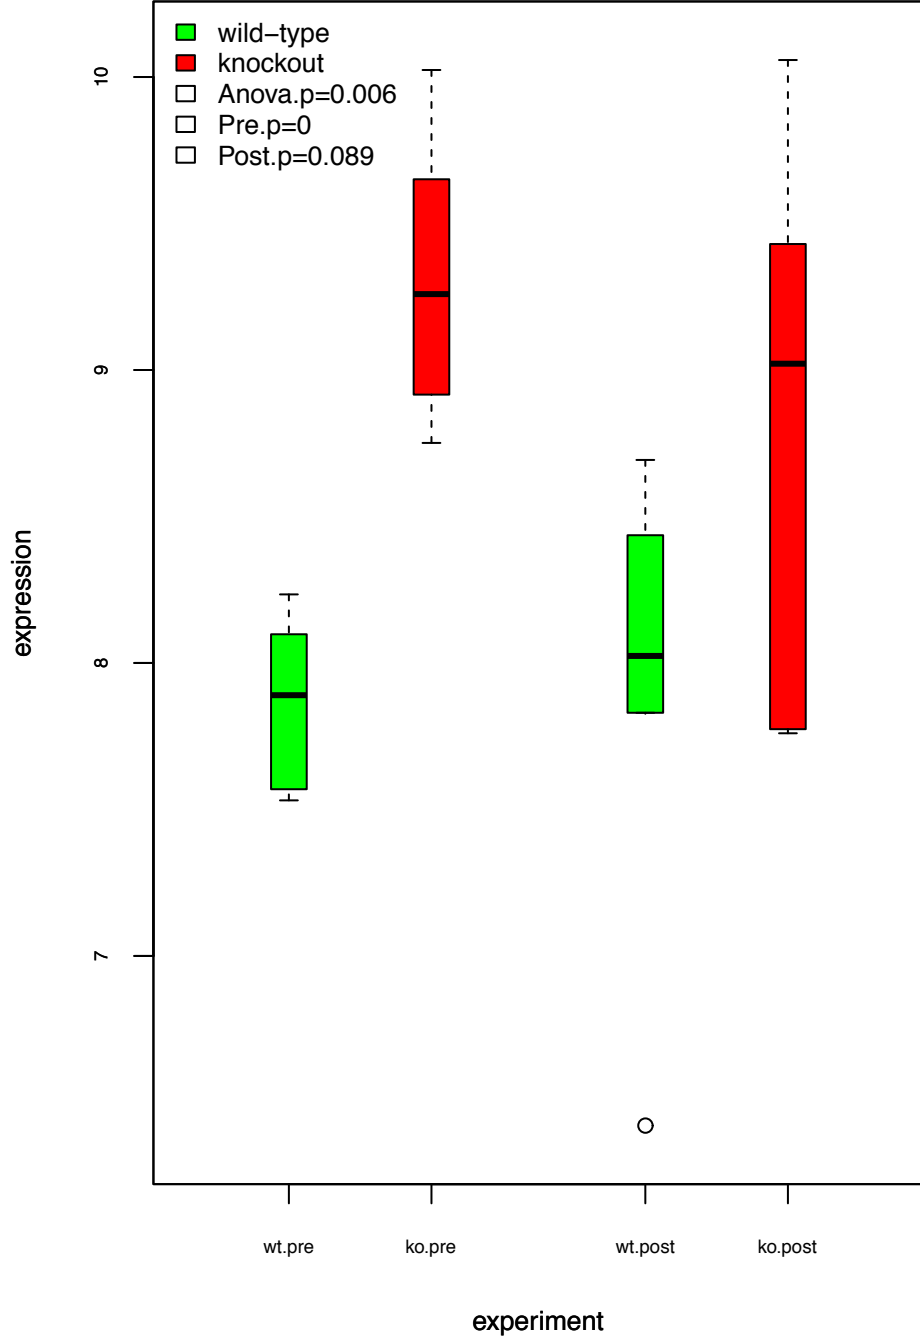

# Igf1

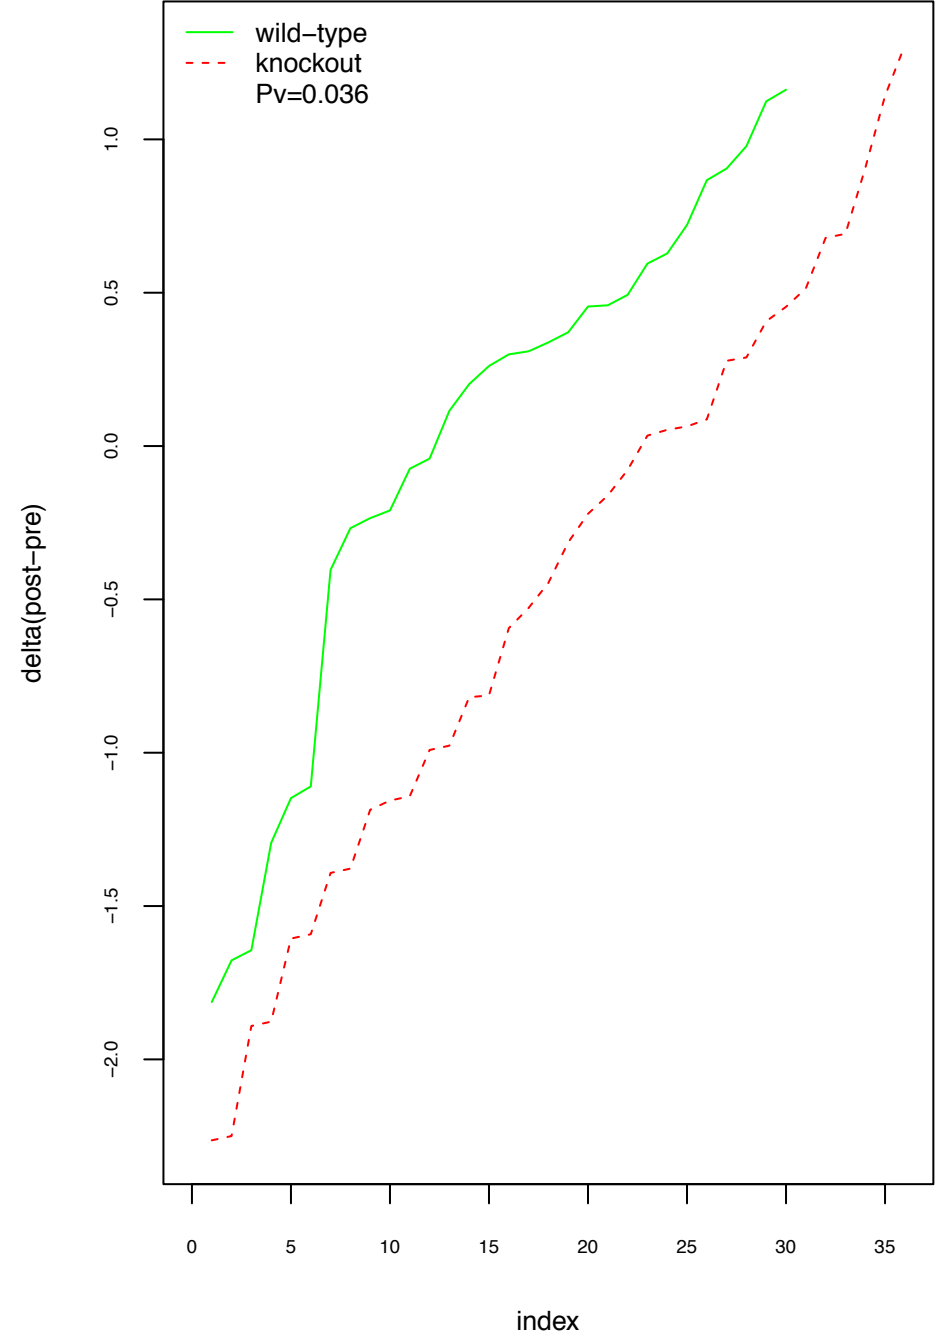

# lfg2

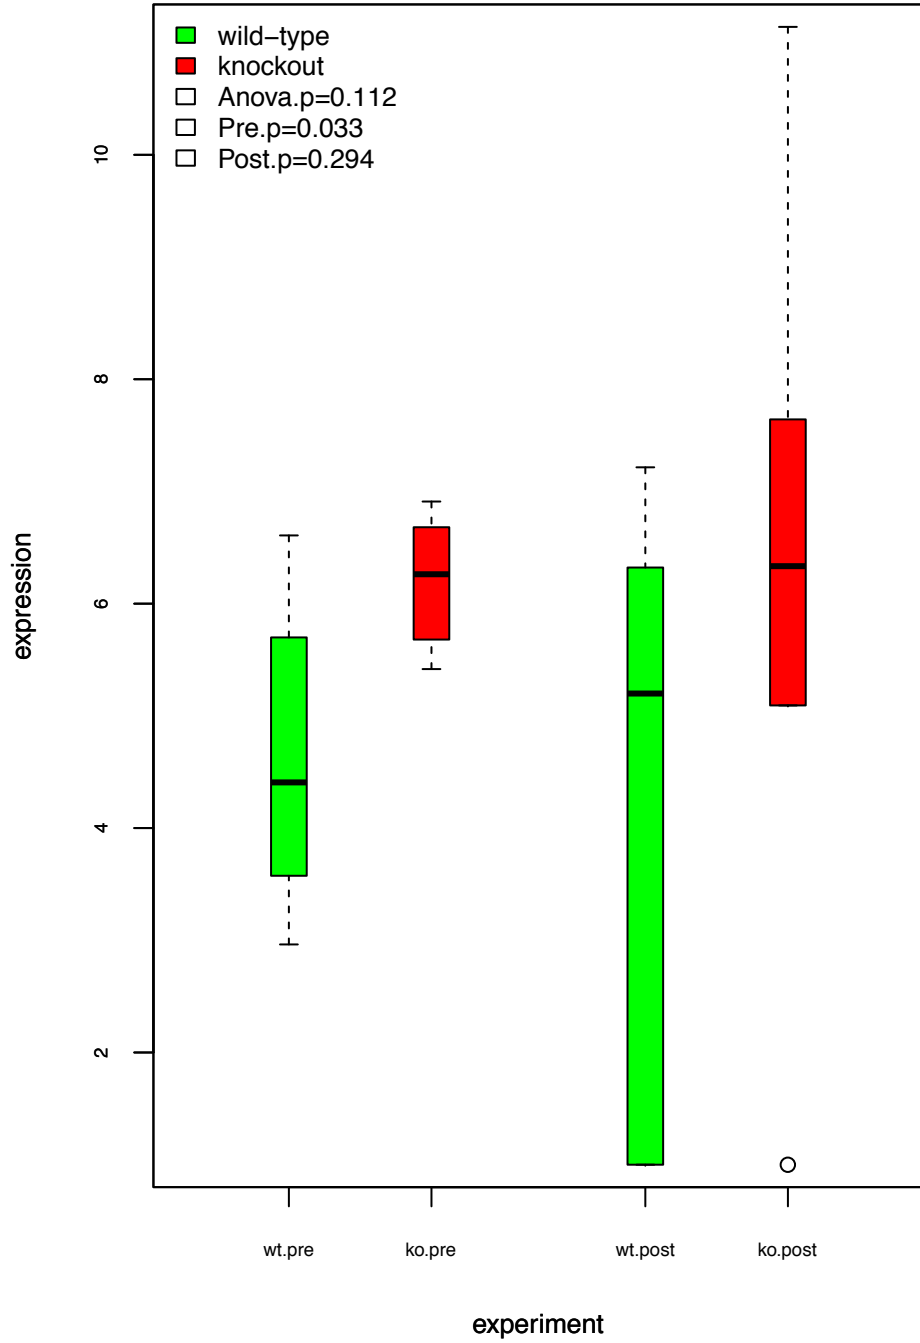

# lfg2

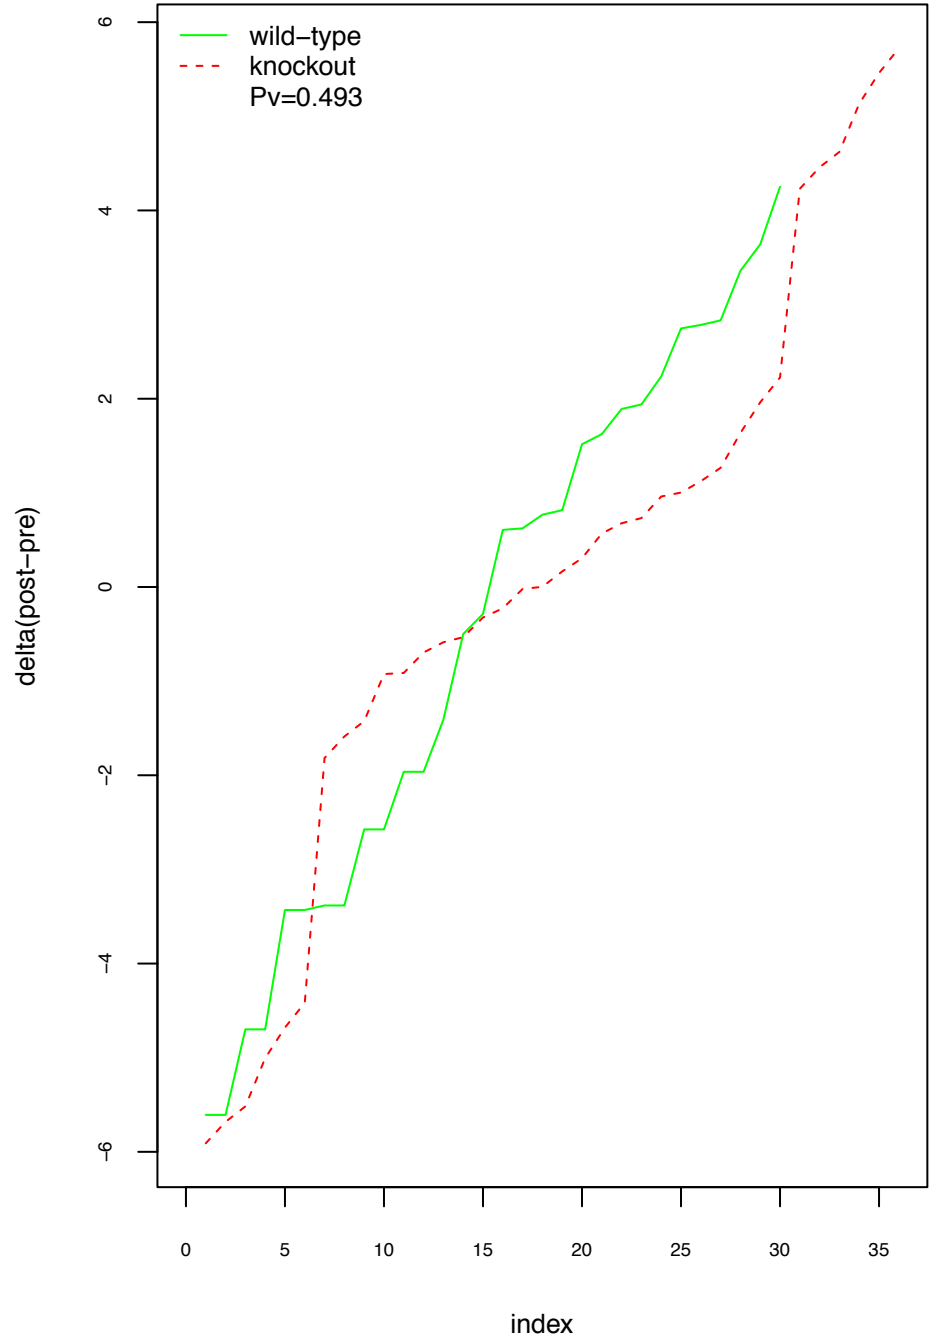

# Id1

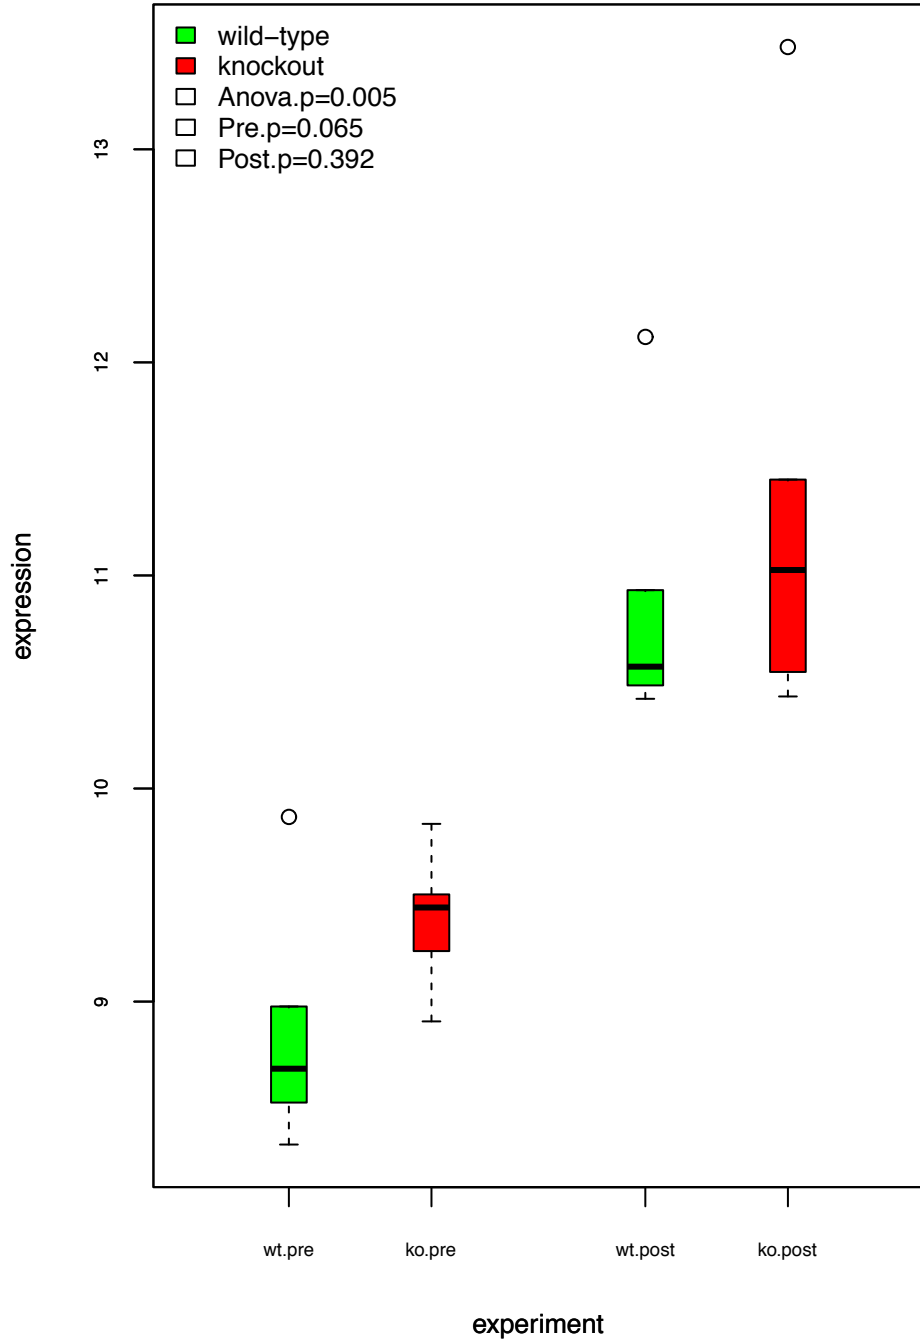

# Id1

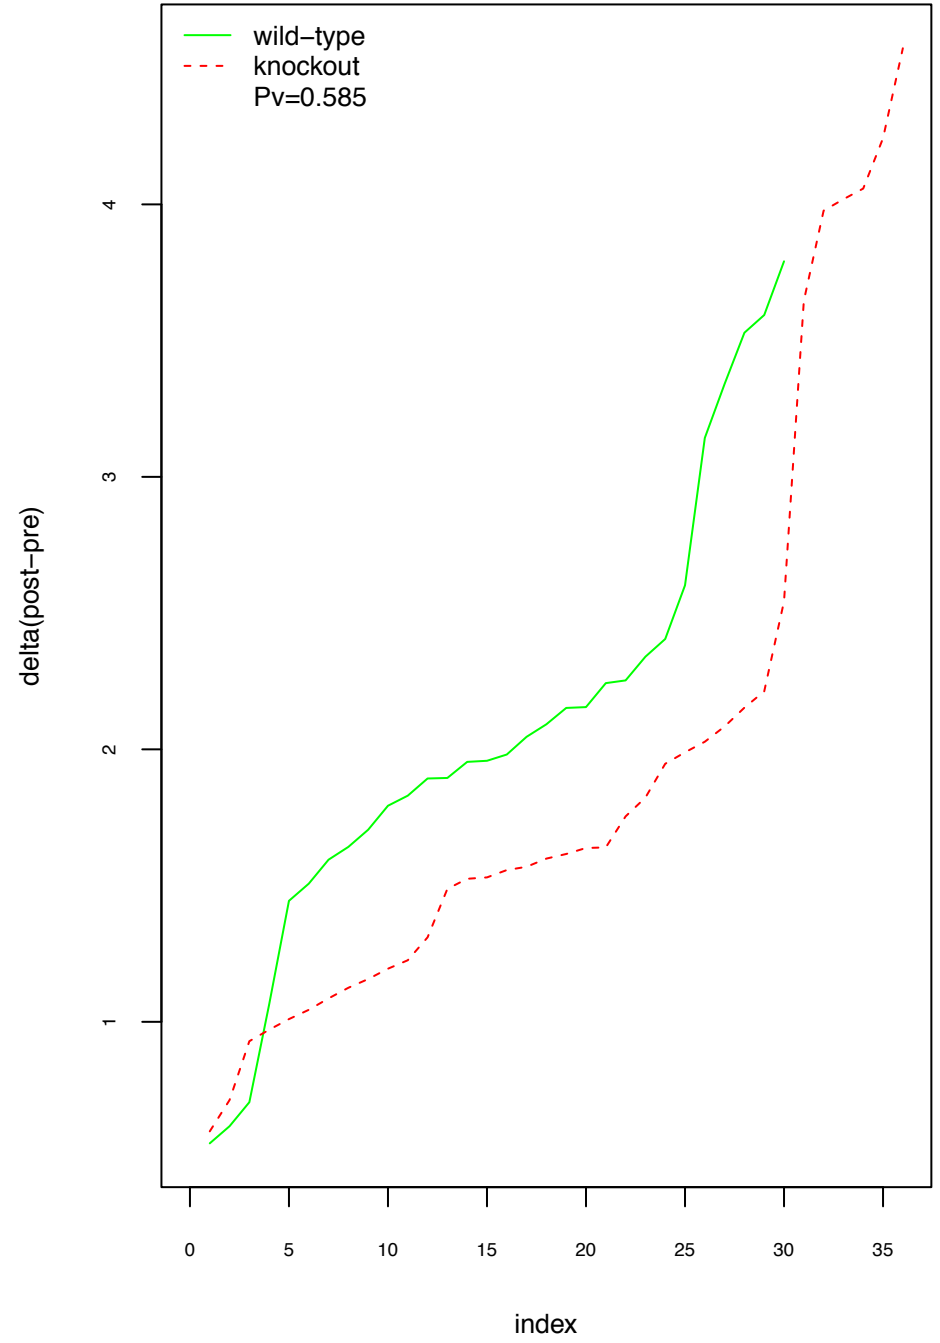

## Jag2

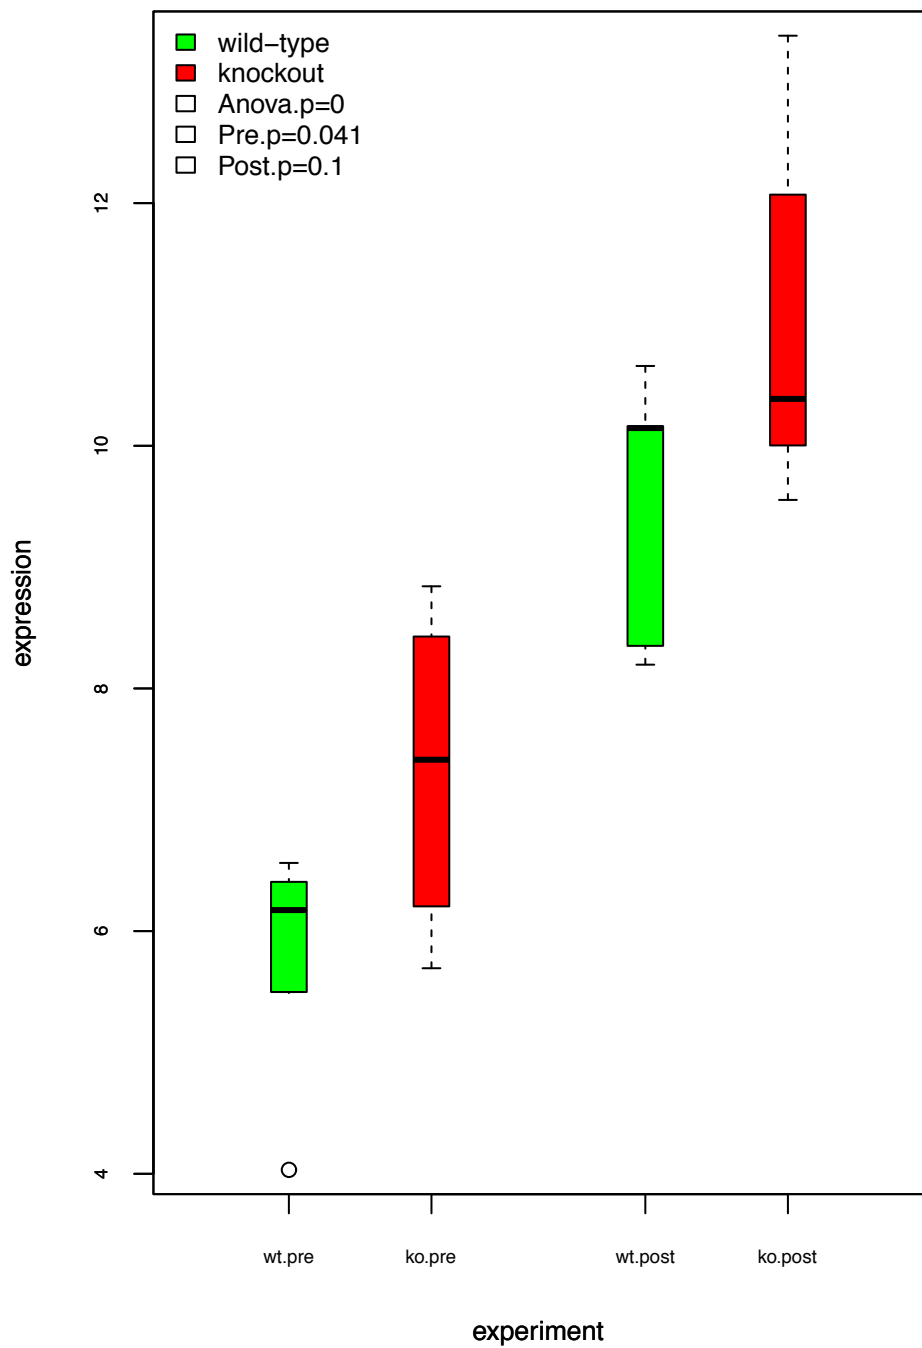

## Jag2

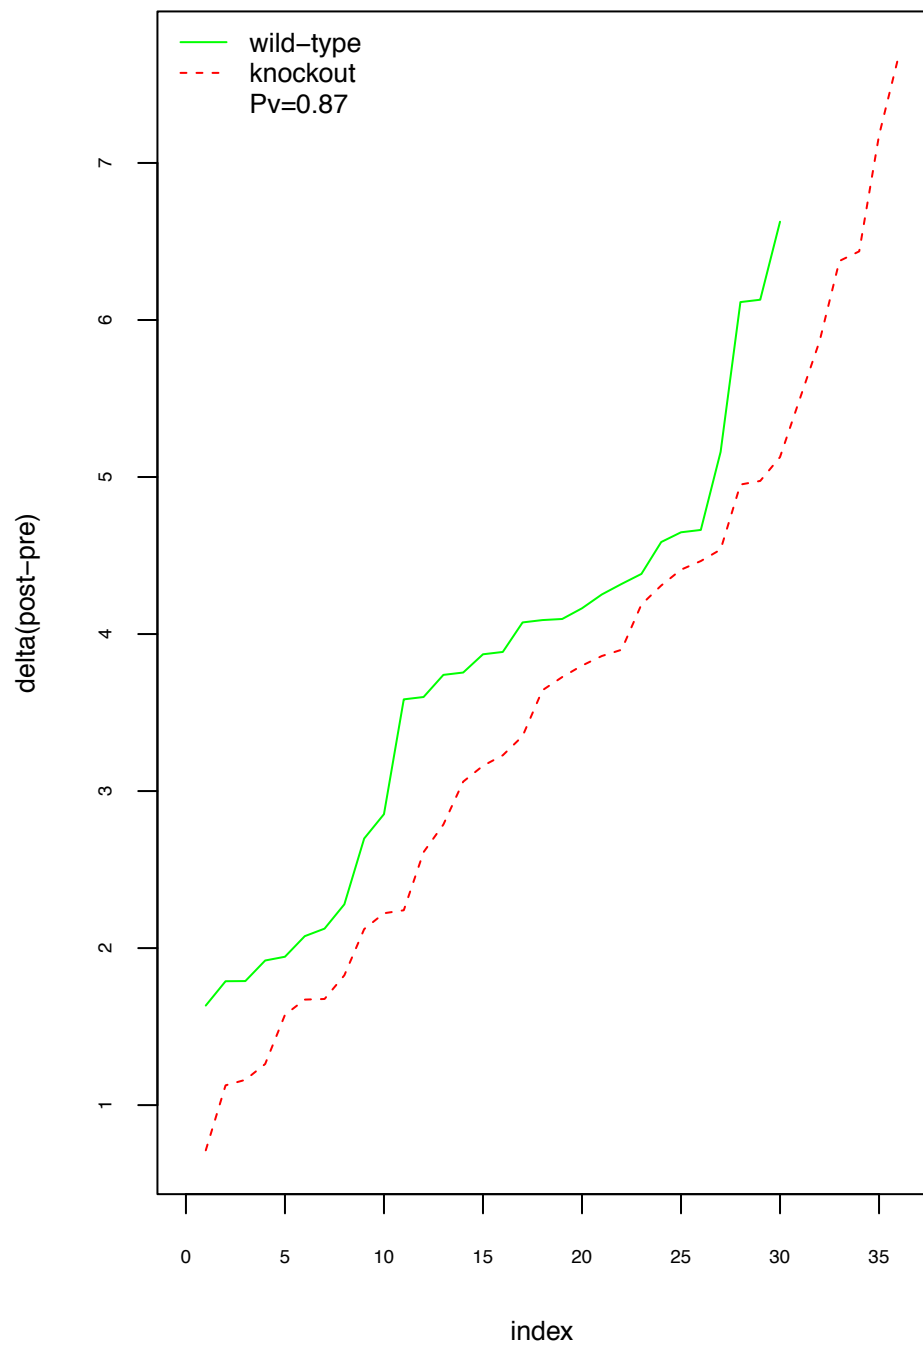

# Lrp6

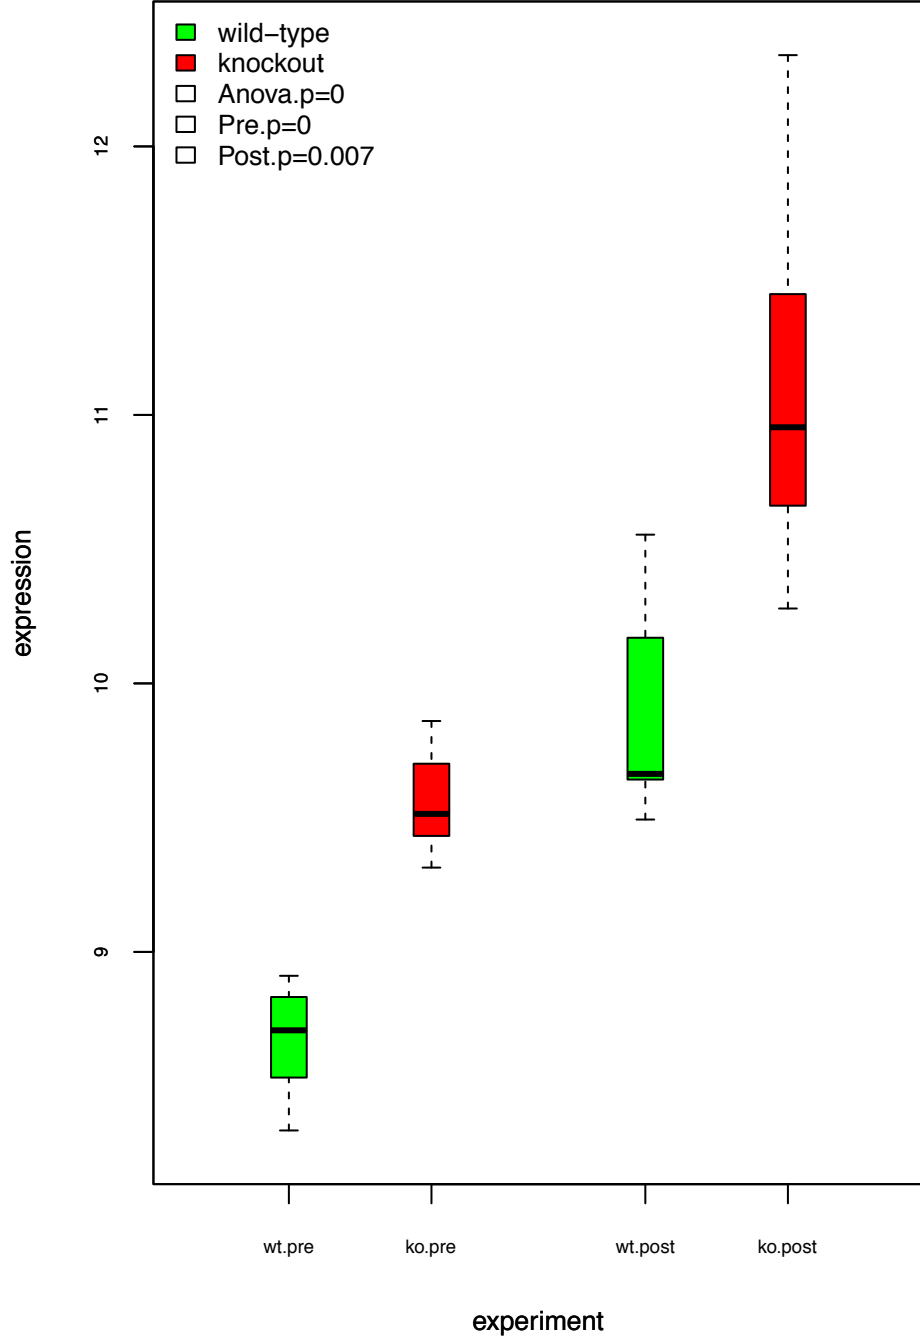

# Lrp6

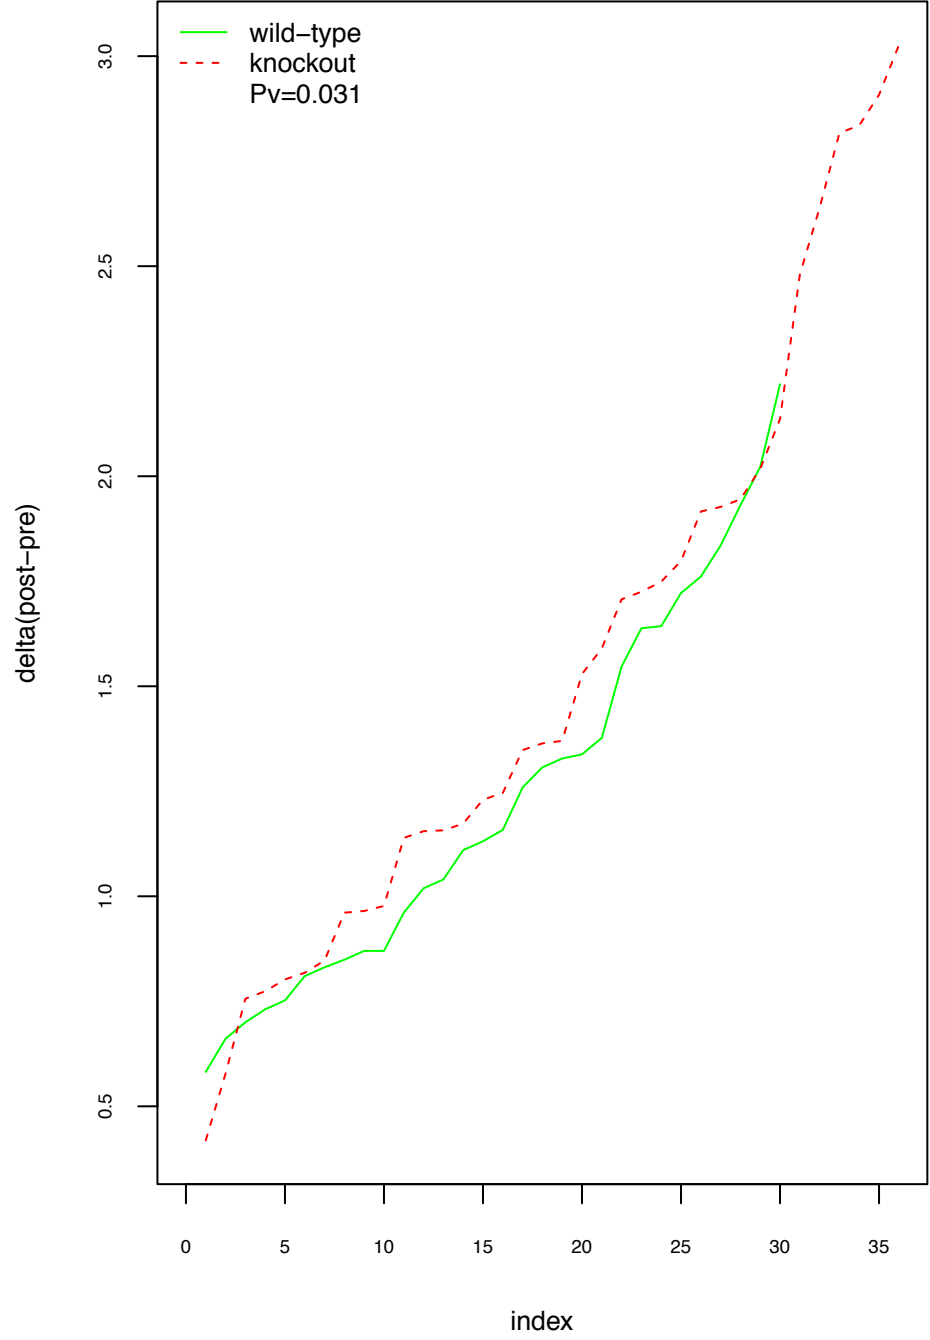

# Lrp5

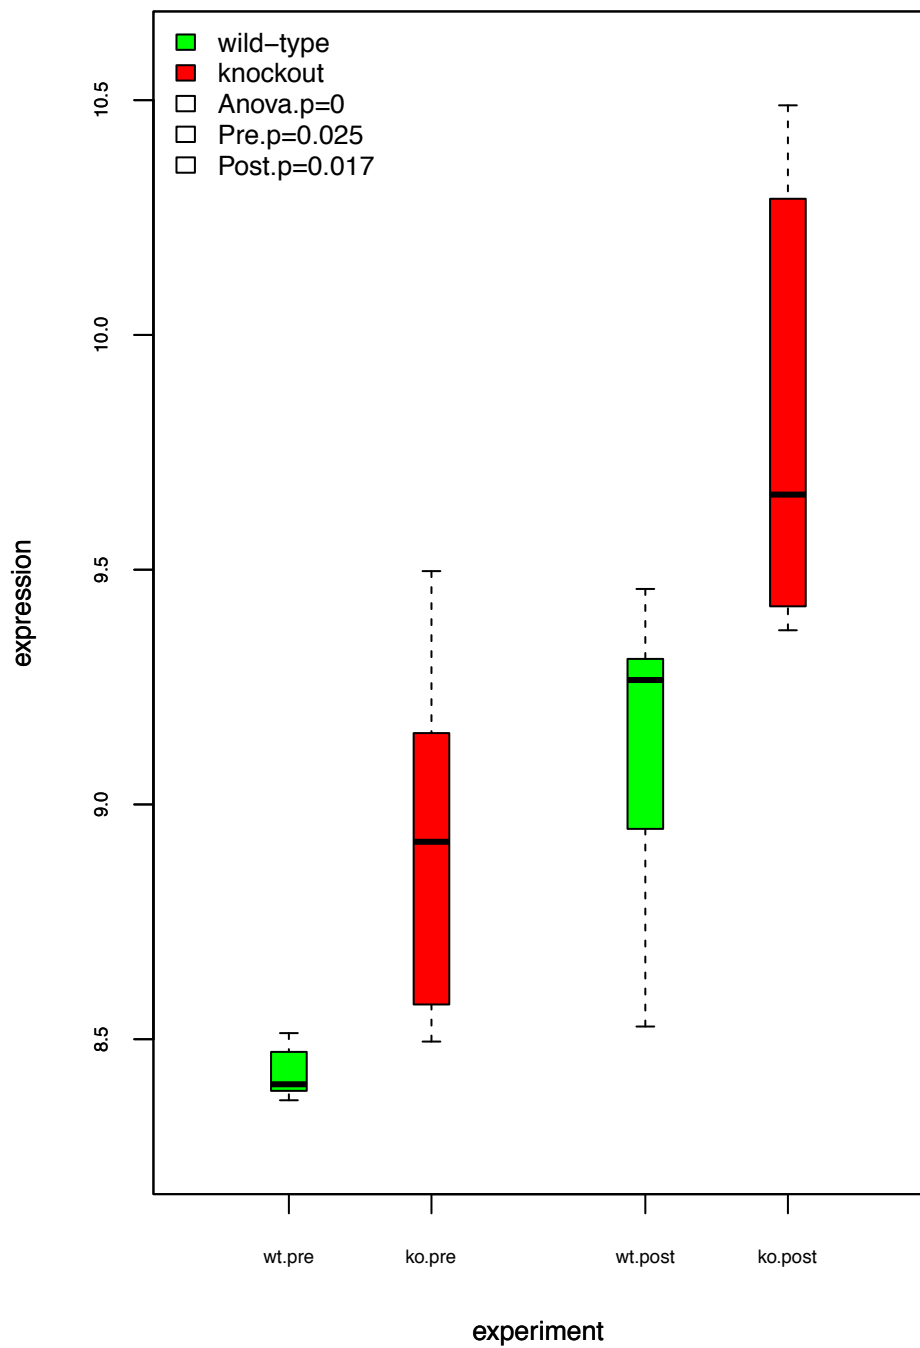

# Lrp5

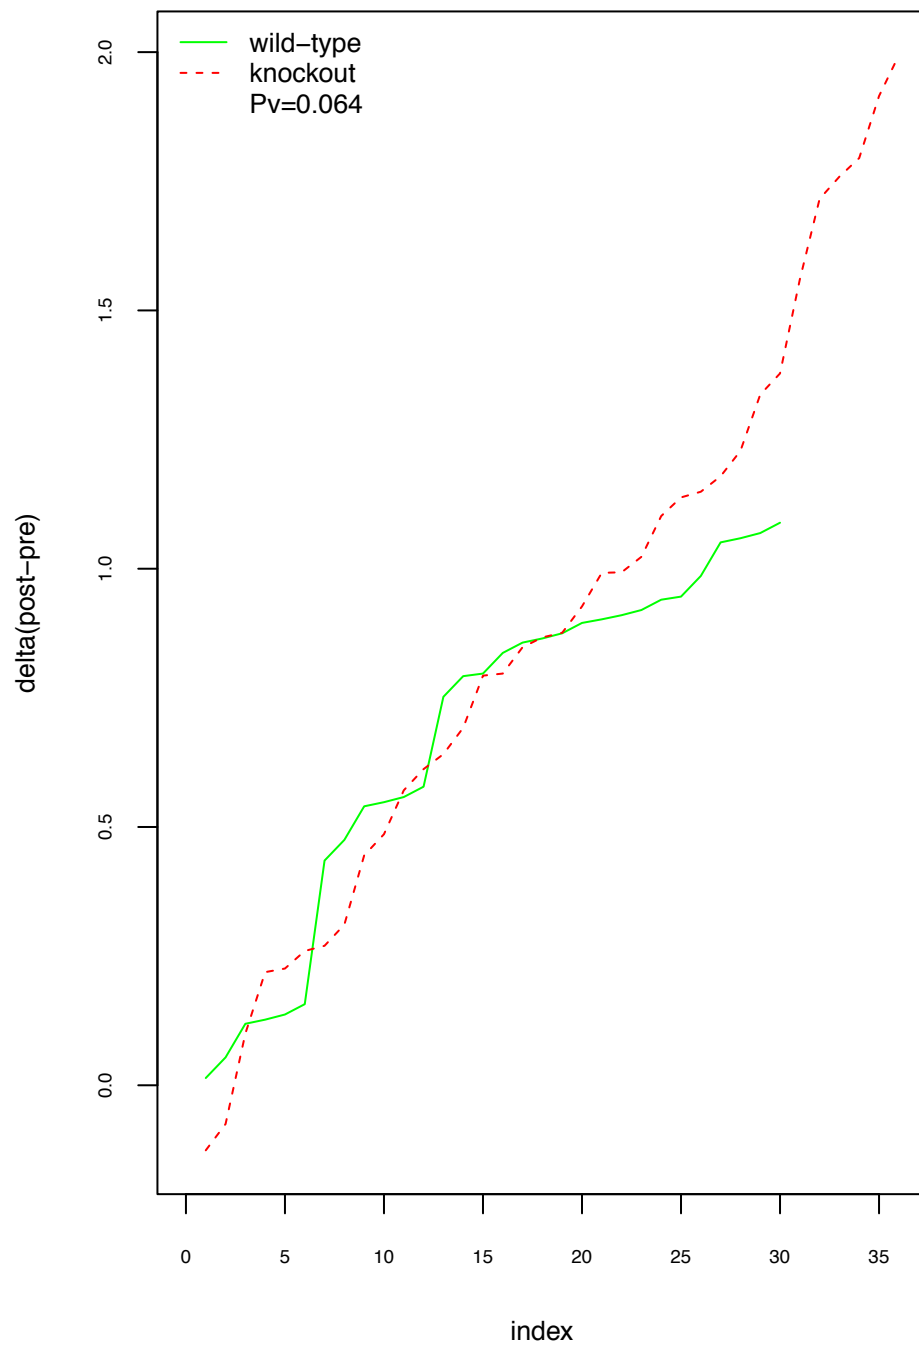

# Lef1

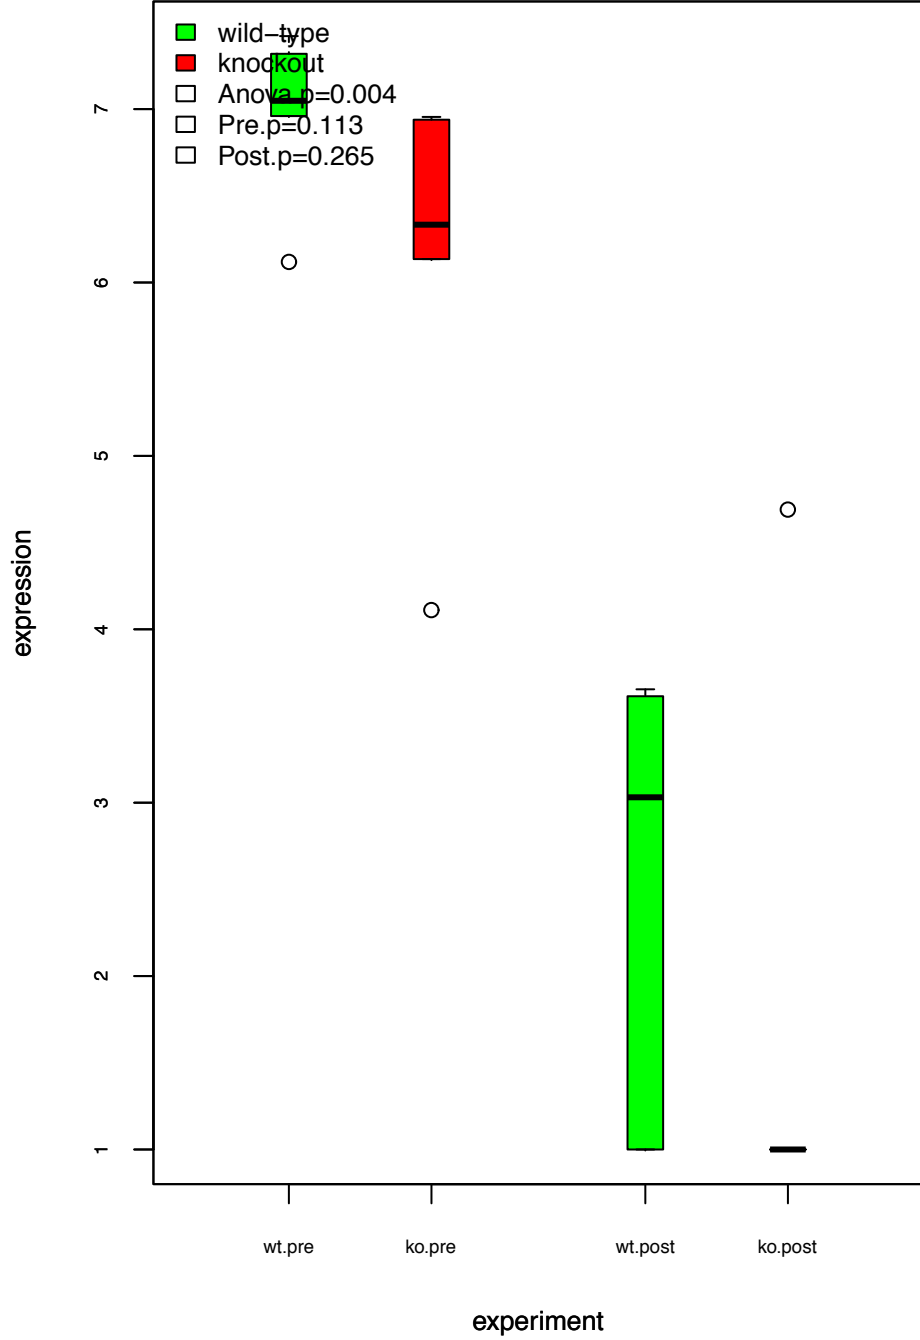

# Lef1

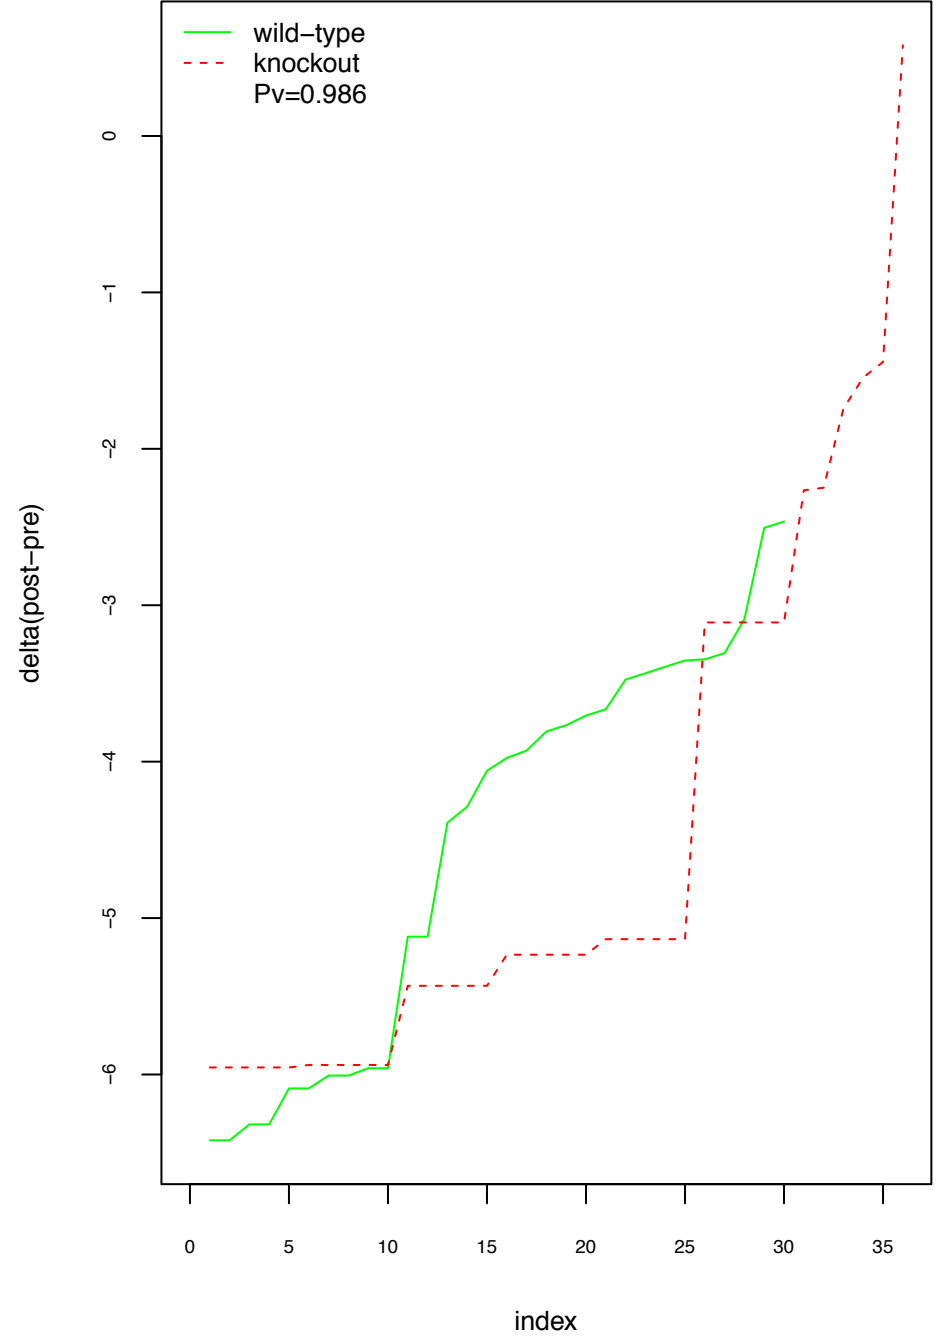

# Myod

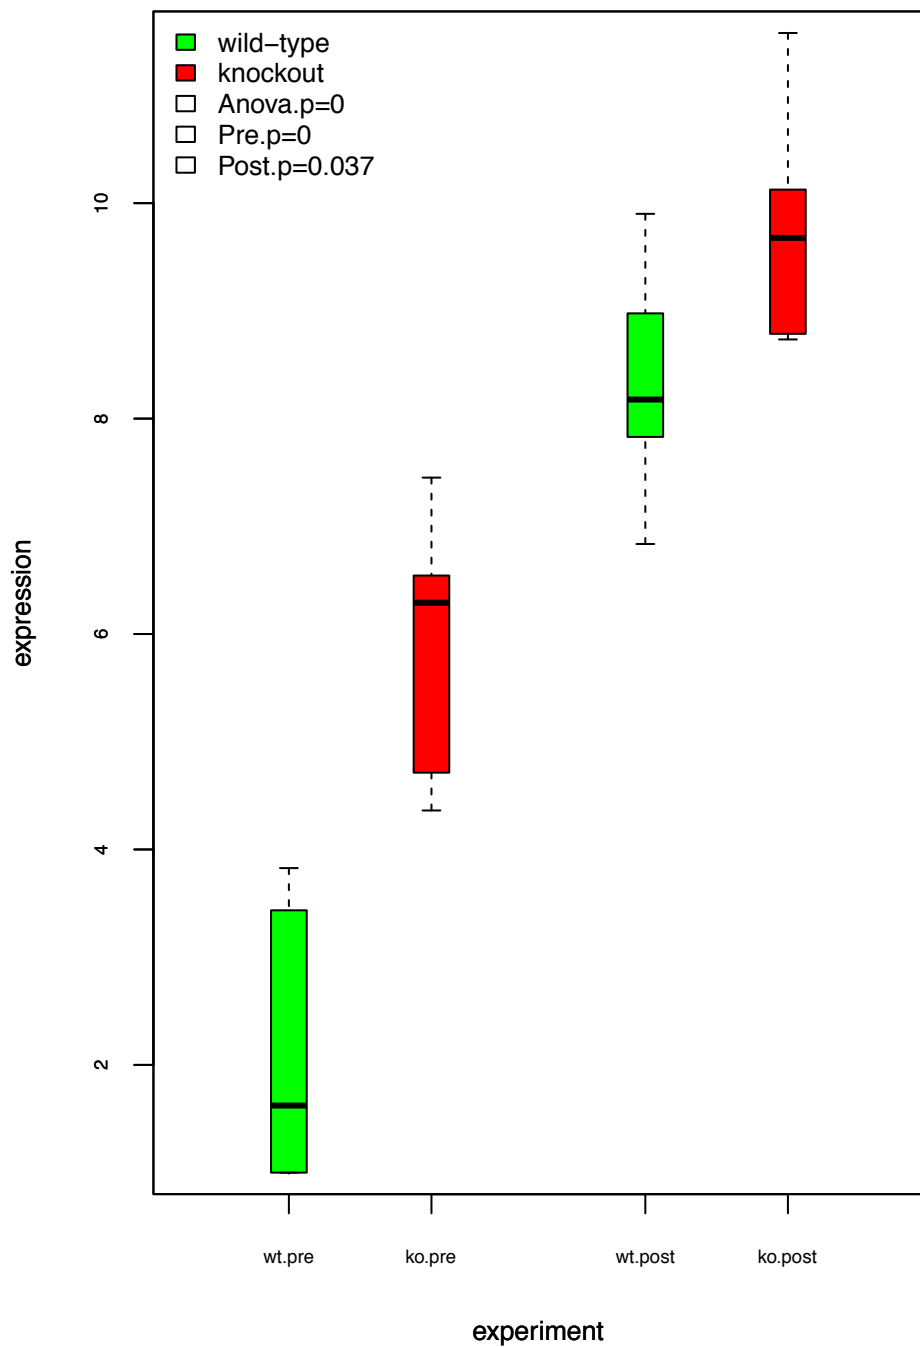

# Myod

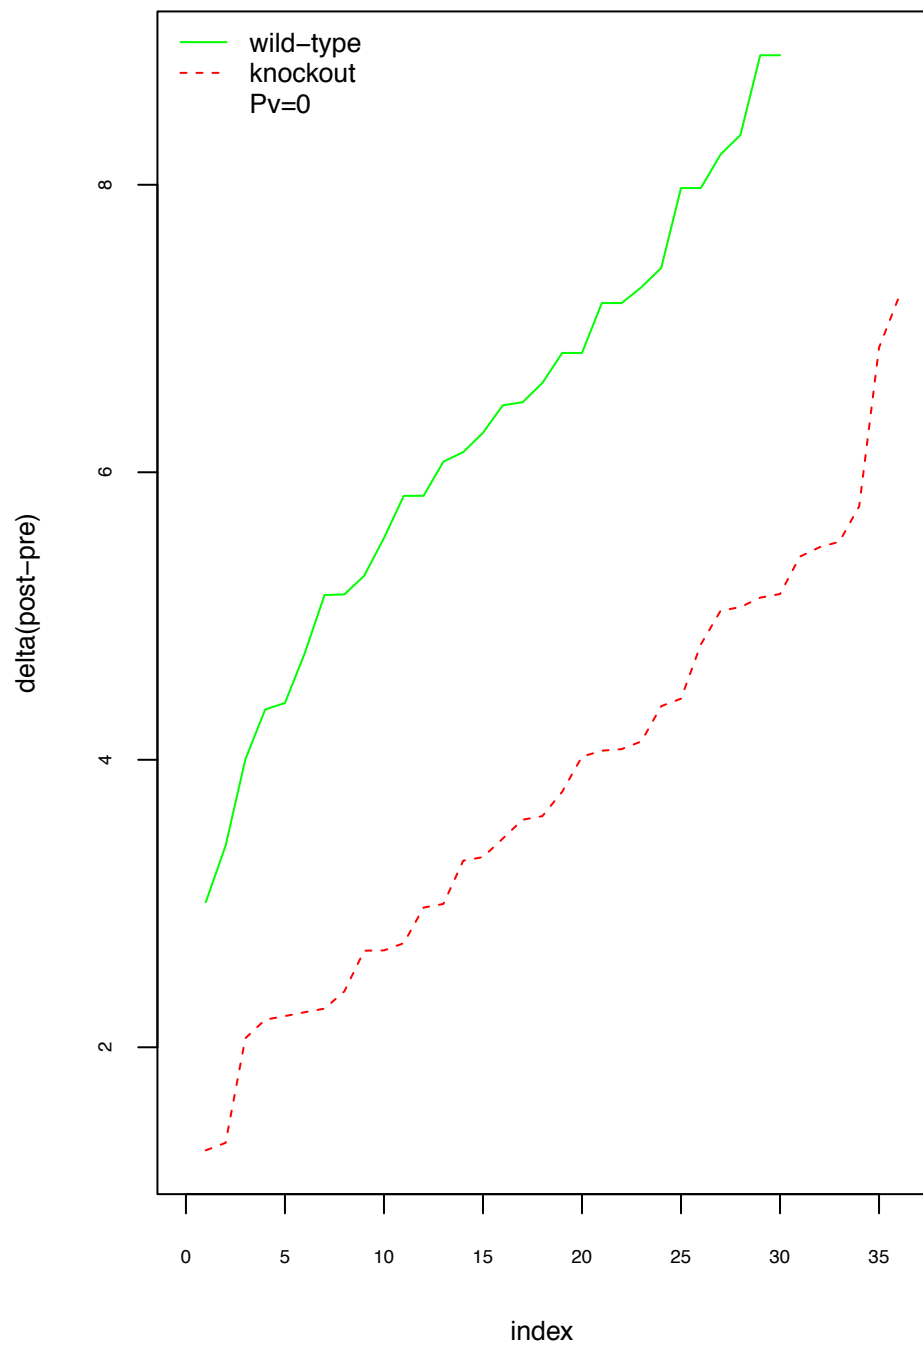



### Myh1

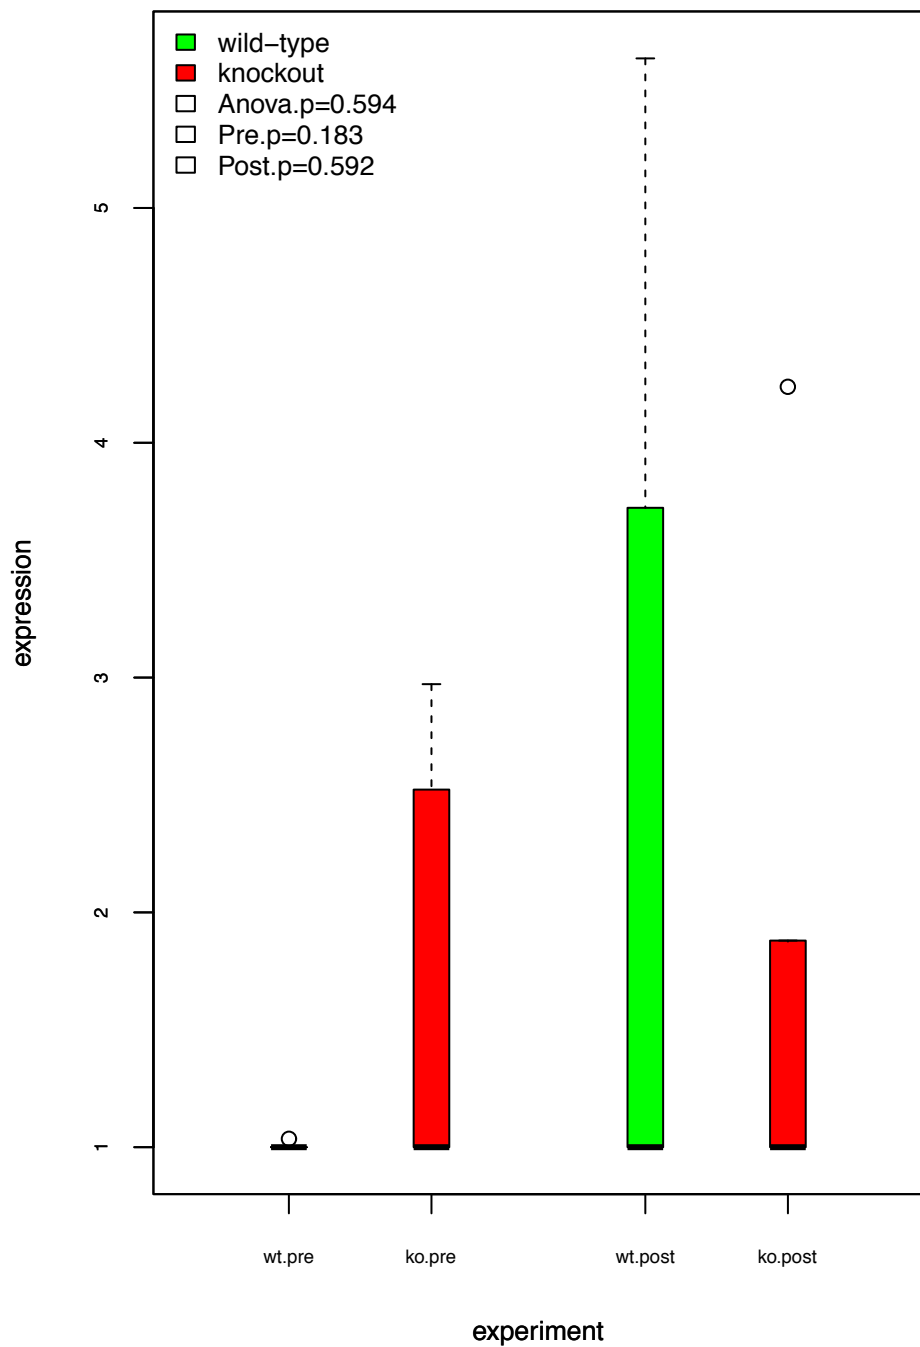

### Myh1

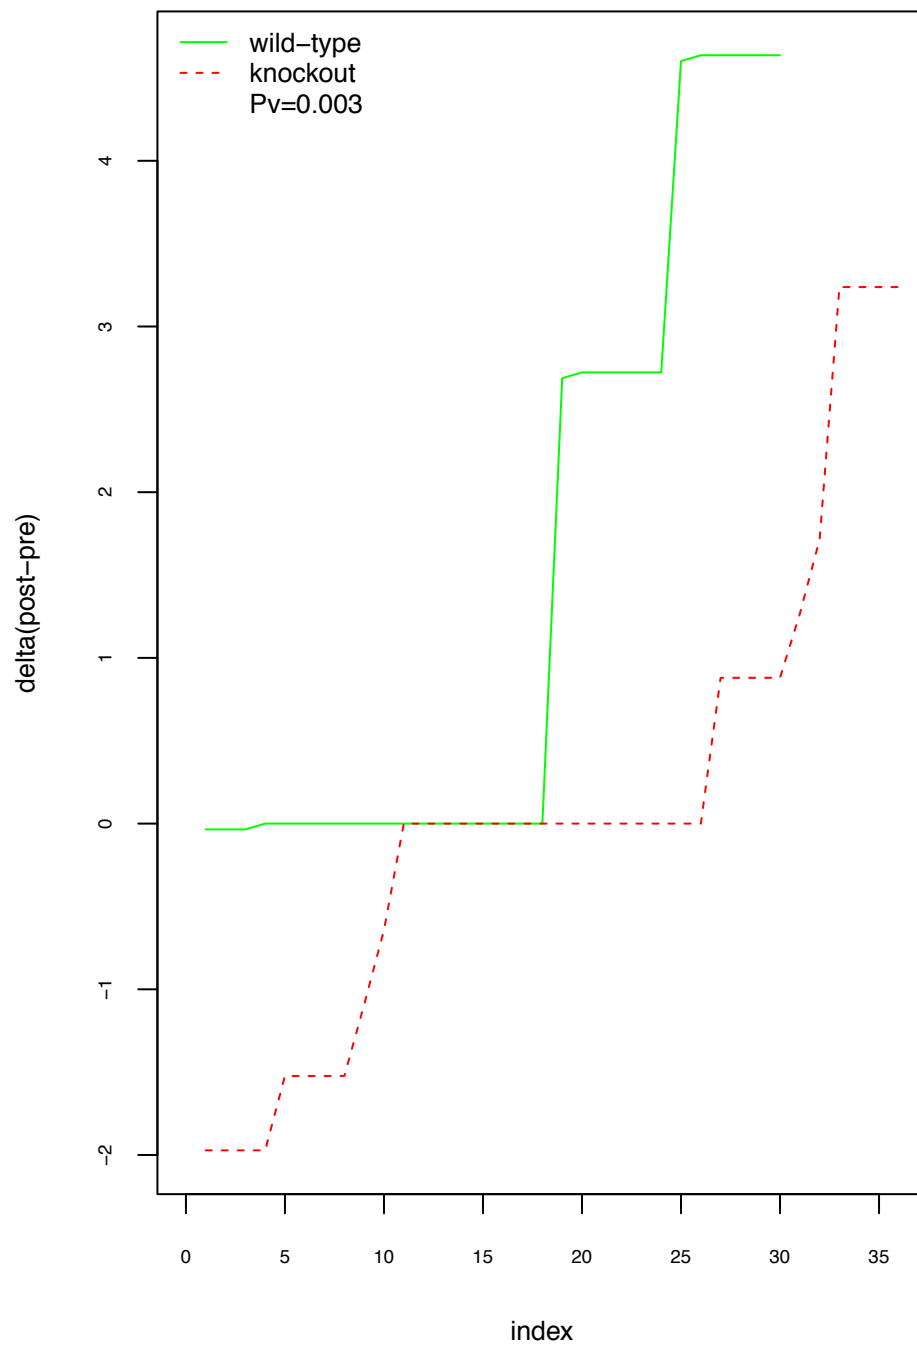

### Msx2

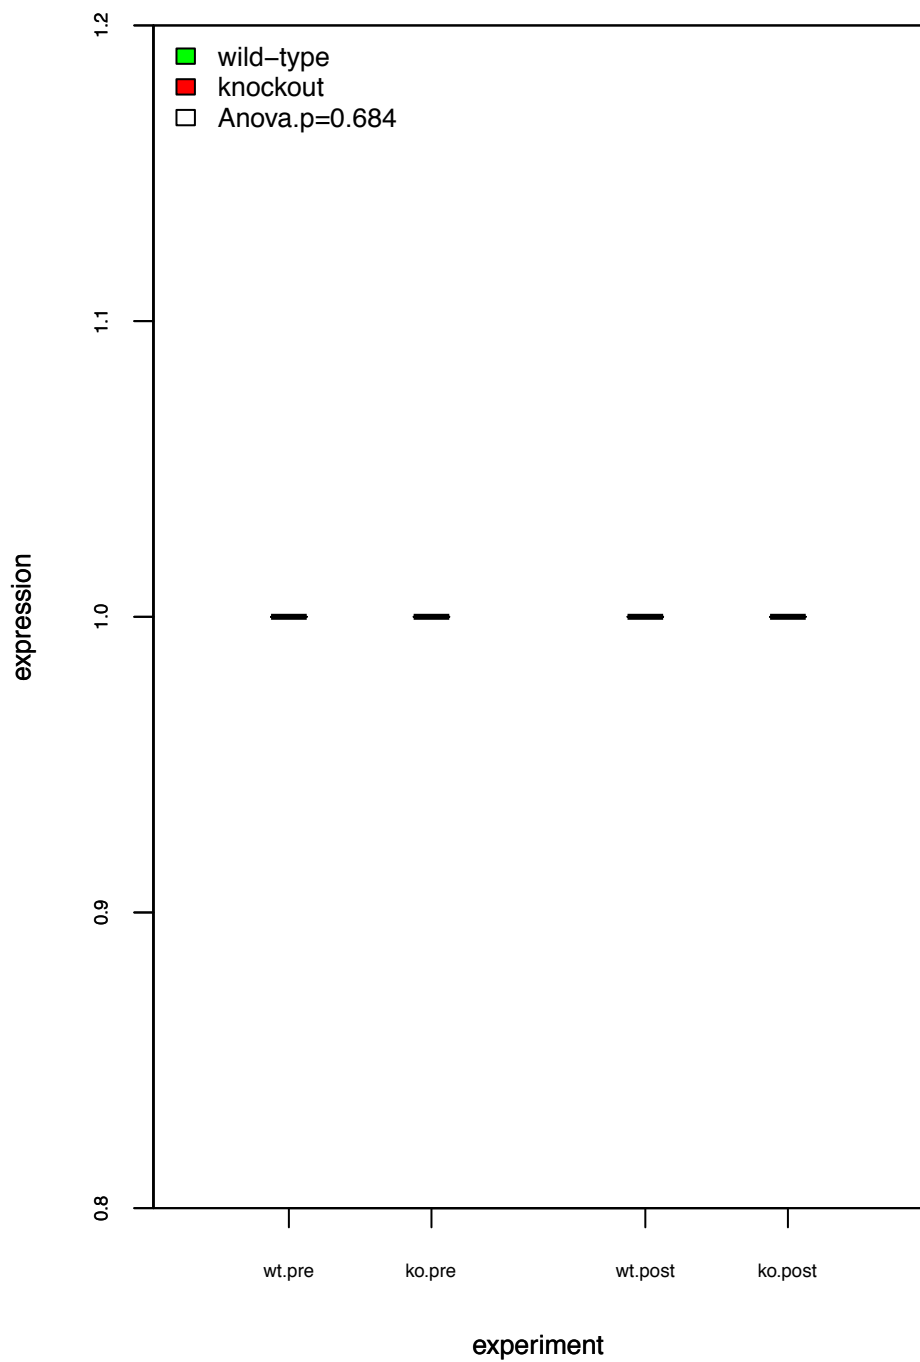

### Msx2



### Mstn

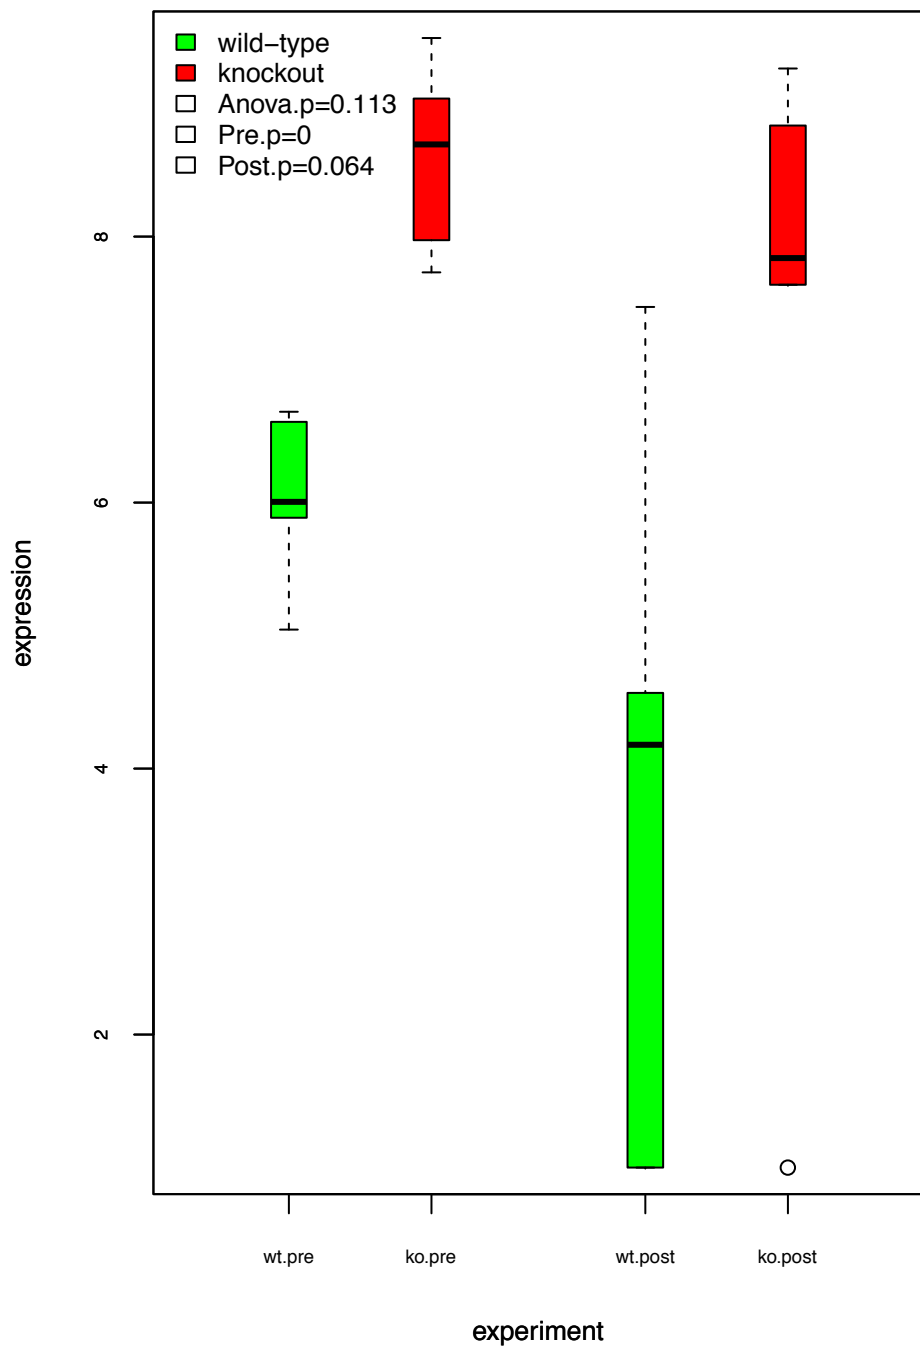

### Mstn

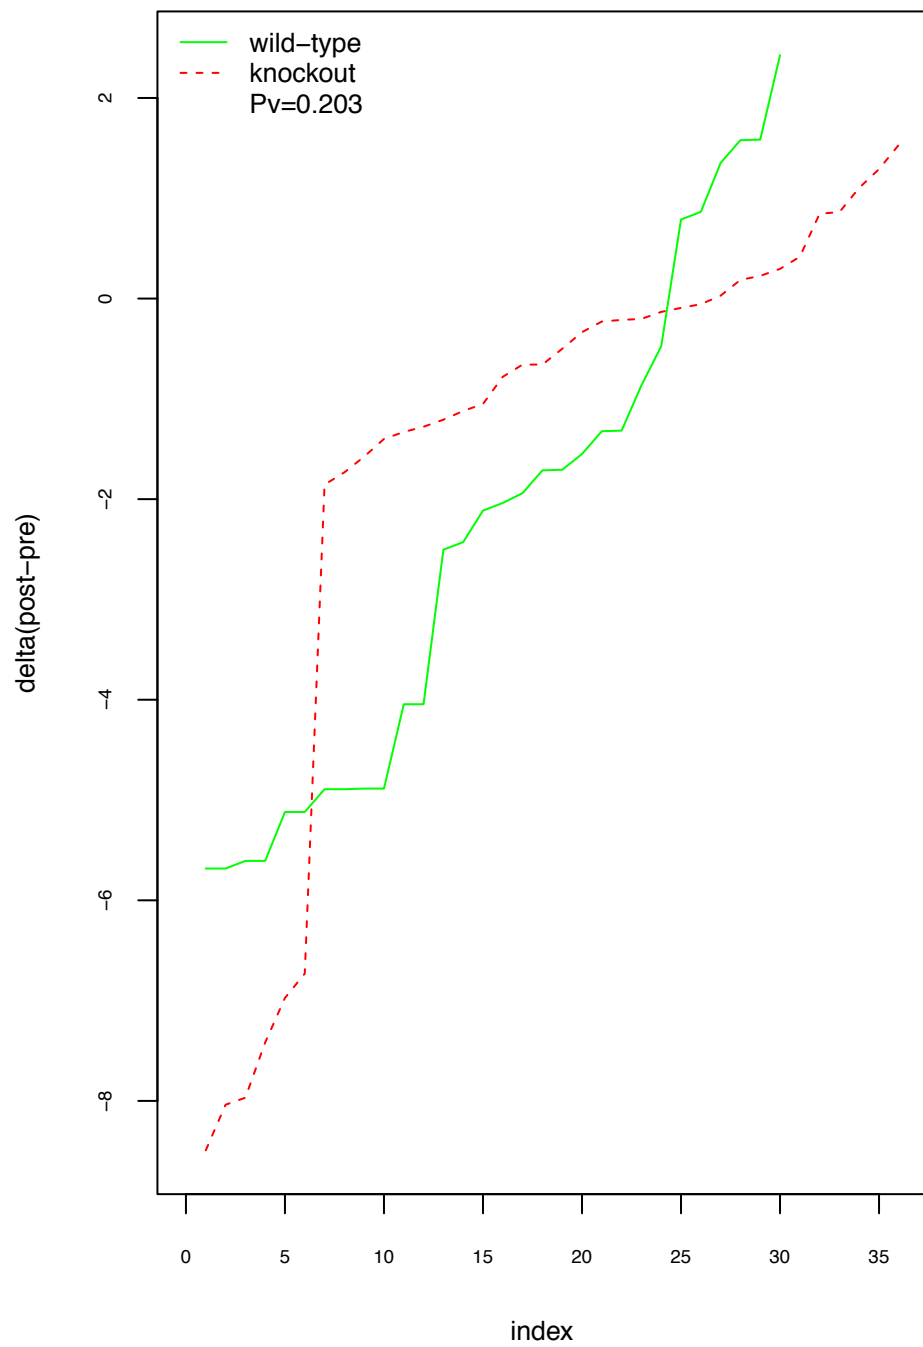

# MMP13

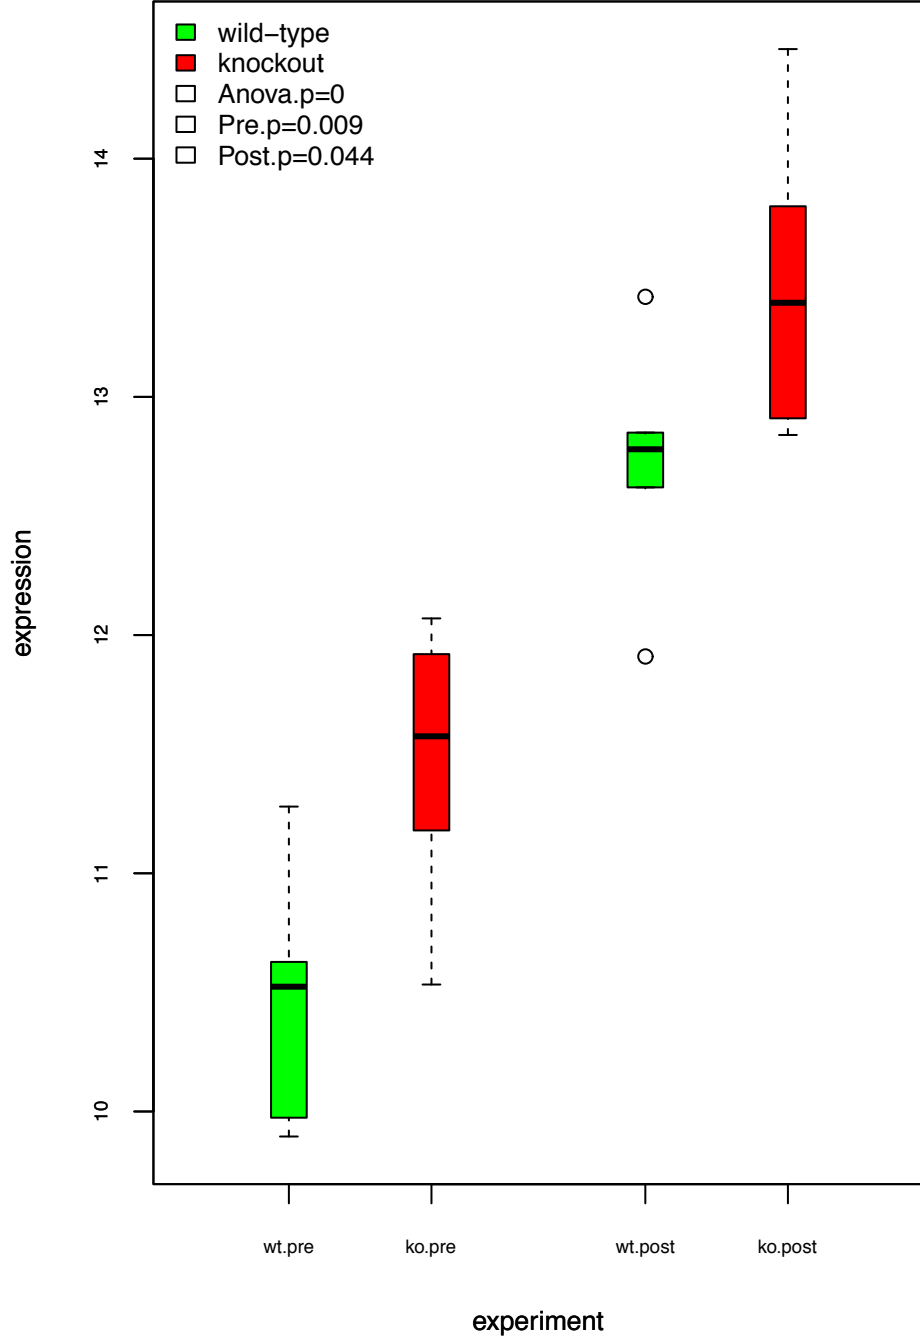

# MMP13

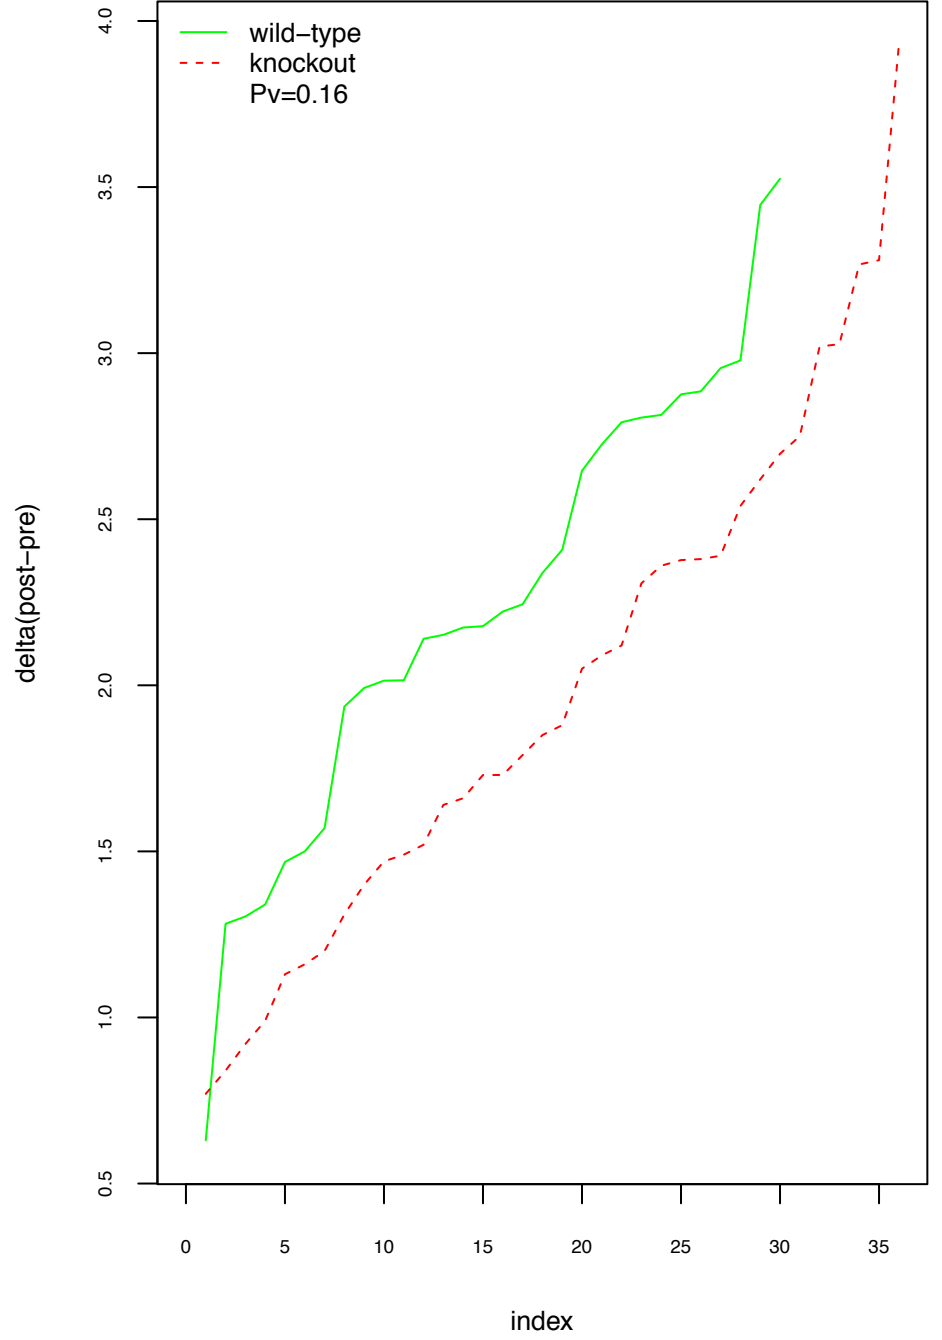

# MMP9

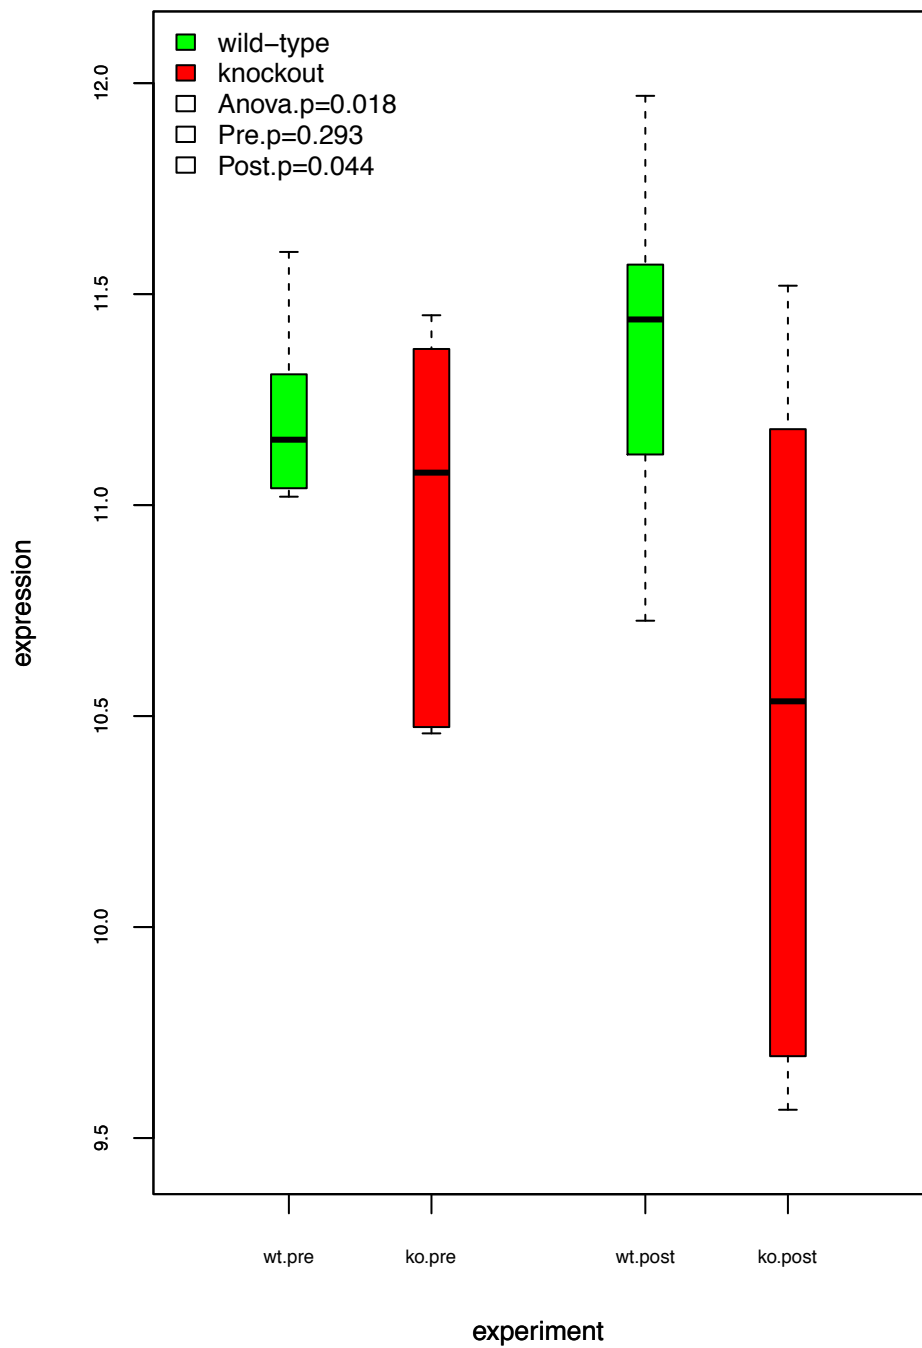

# MMP9

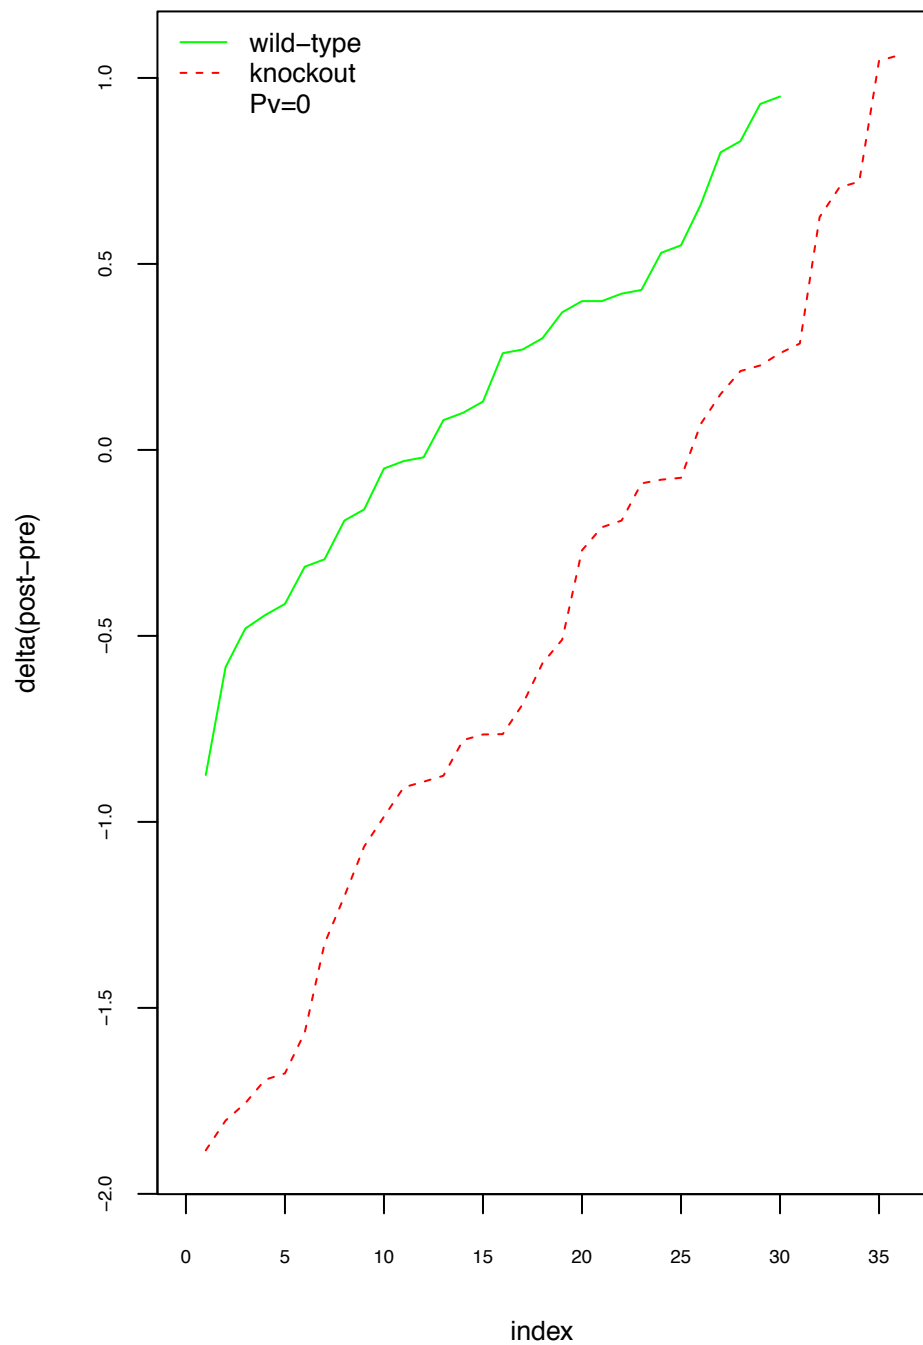

## Mef2c

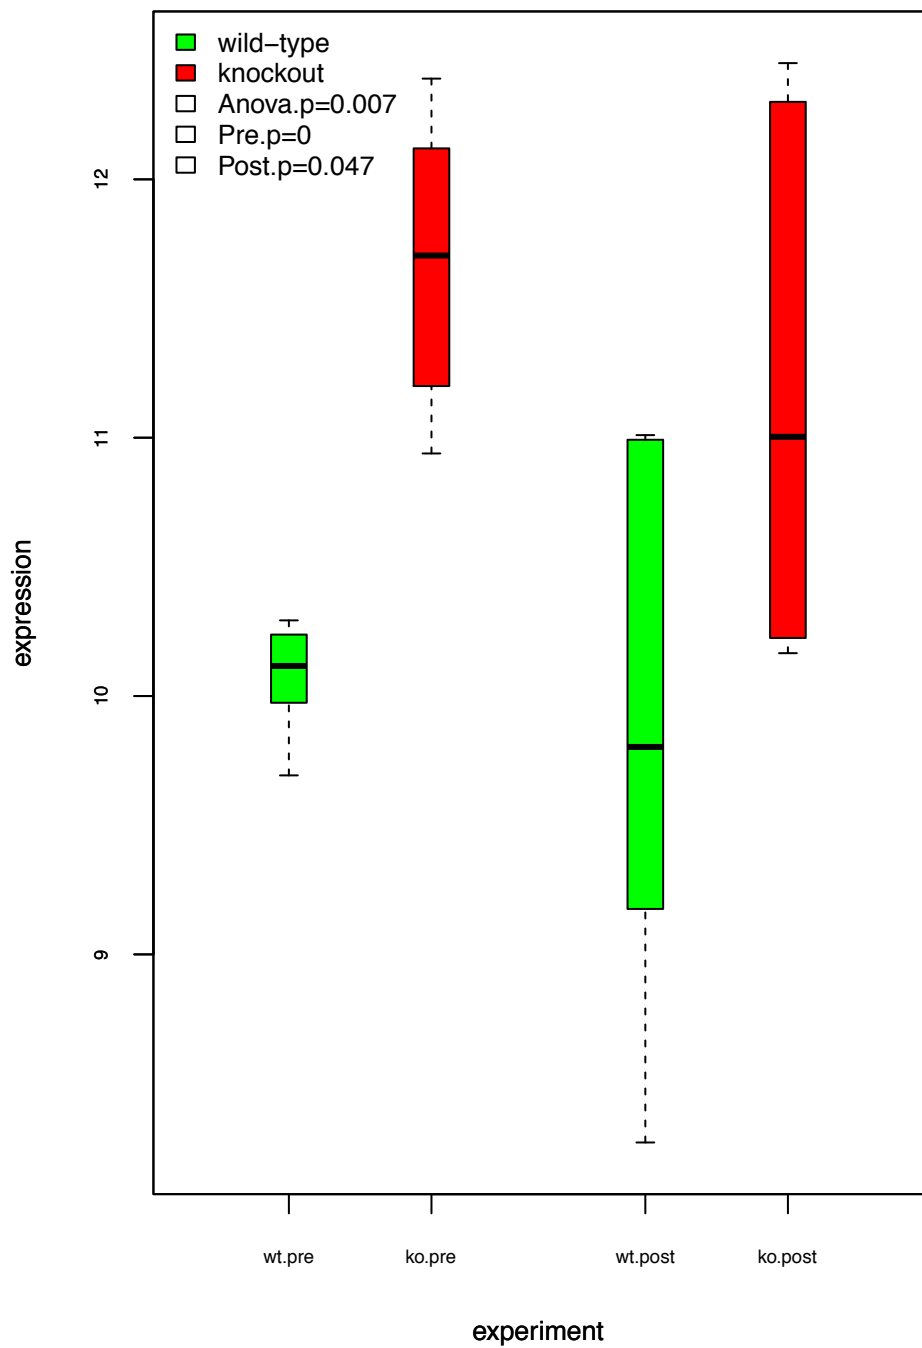

## Mef2c

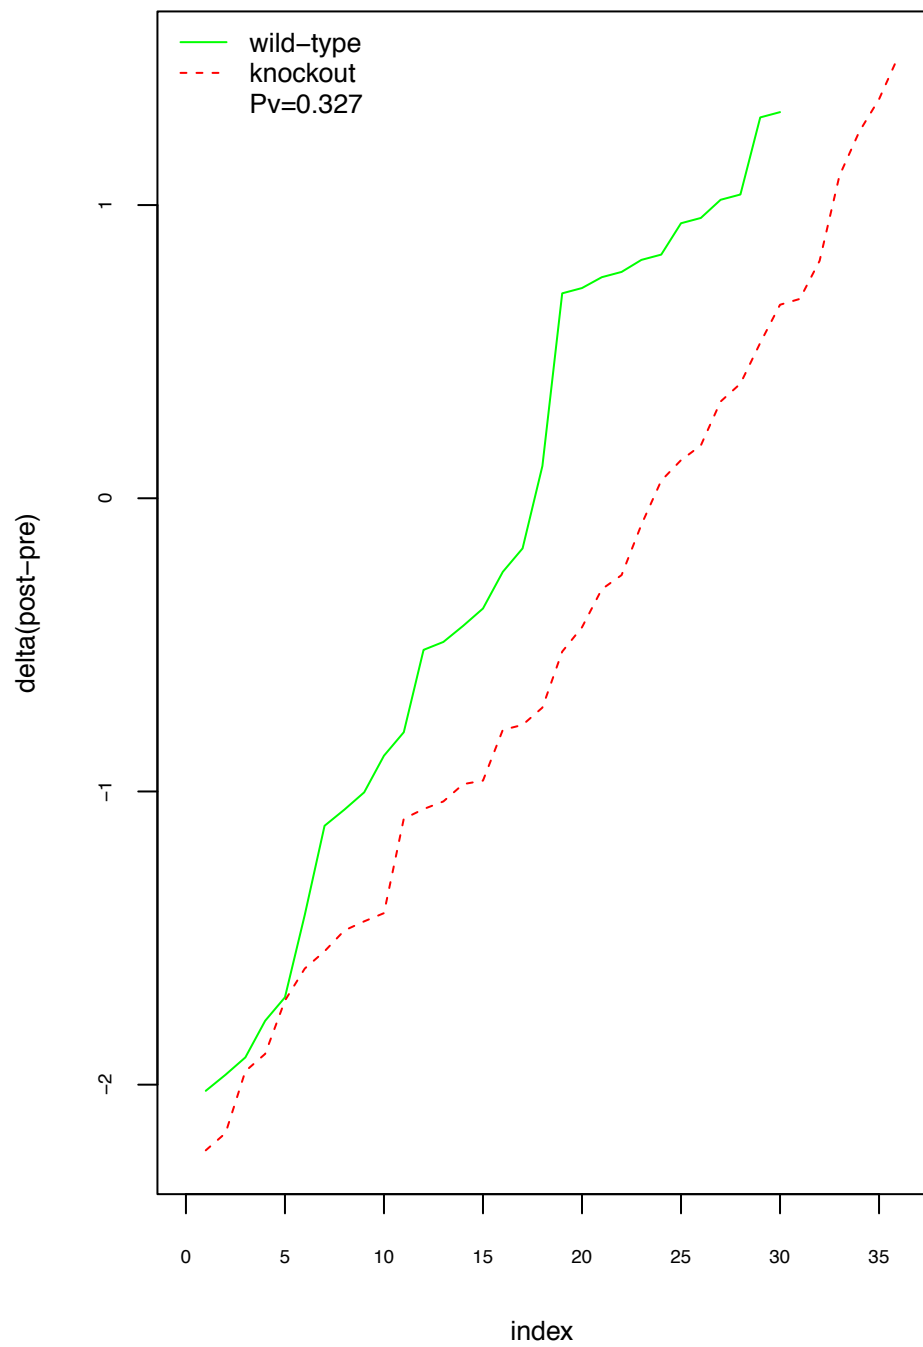

### MCAM\_CD146

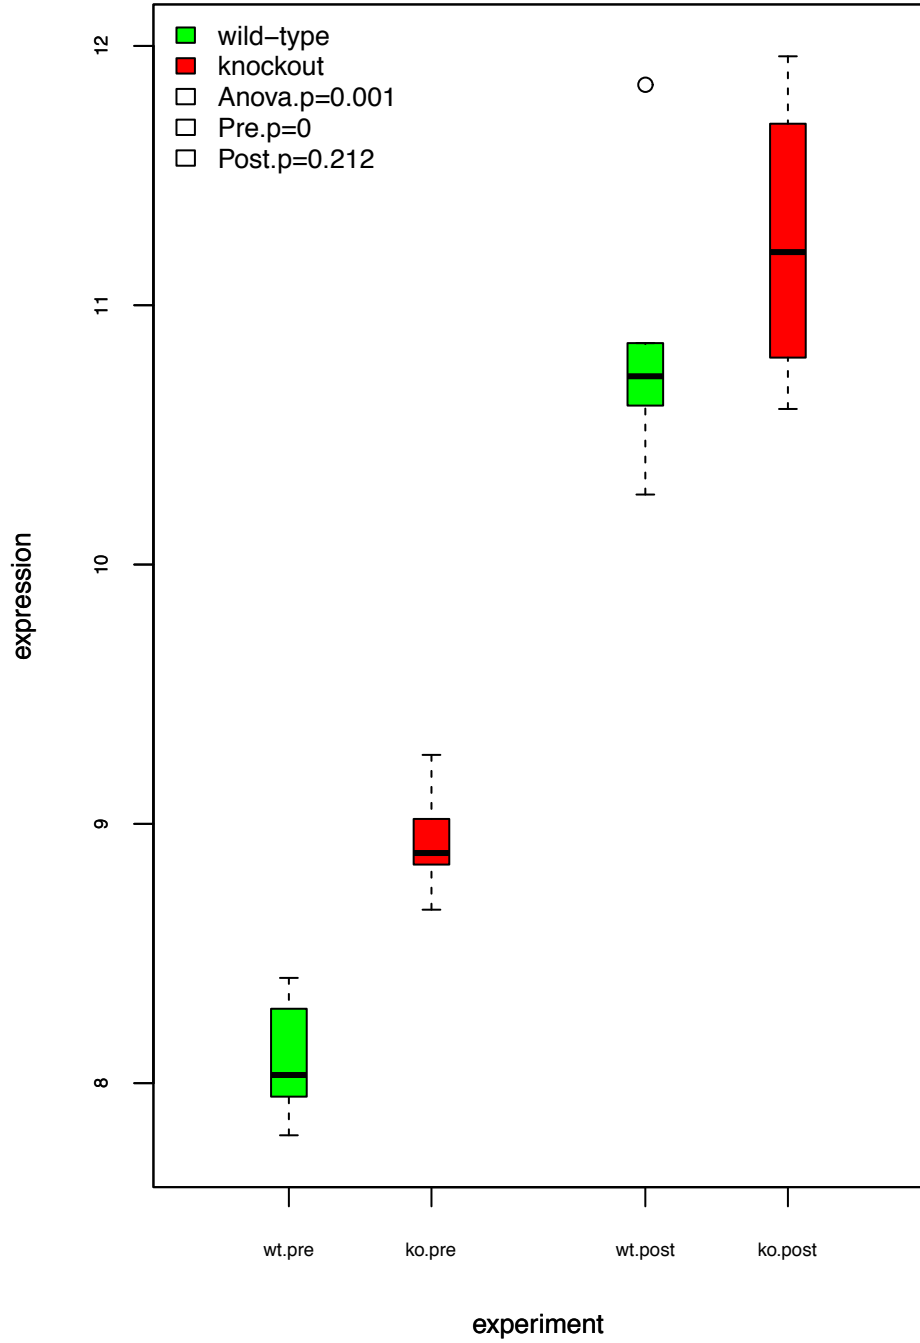

### MCAM\_CD146

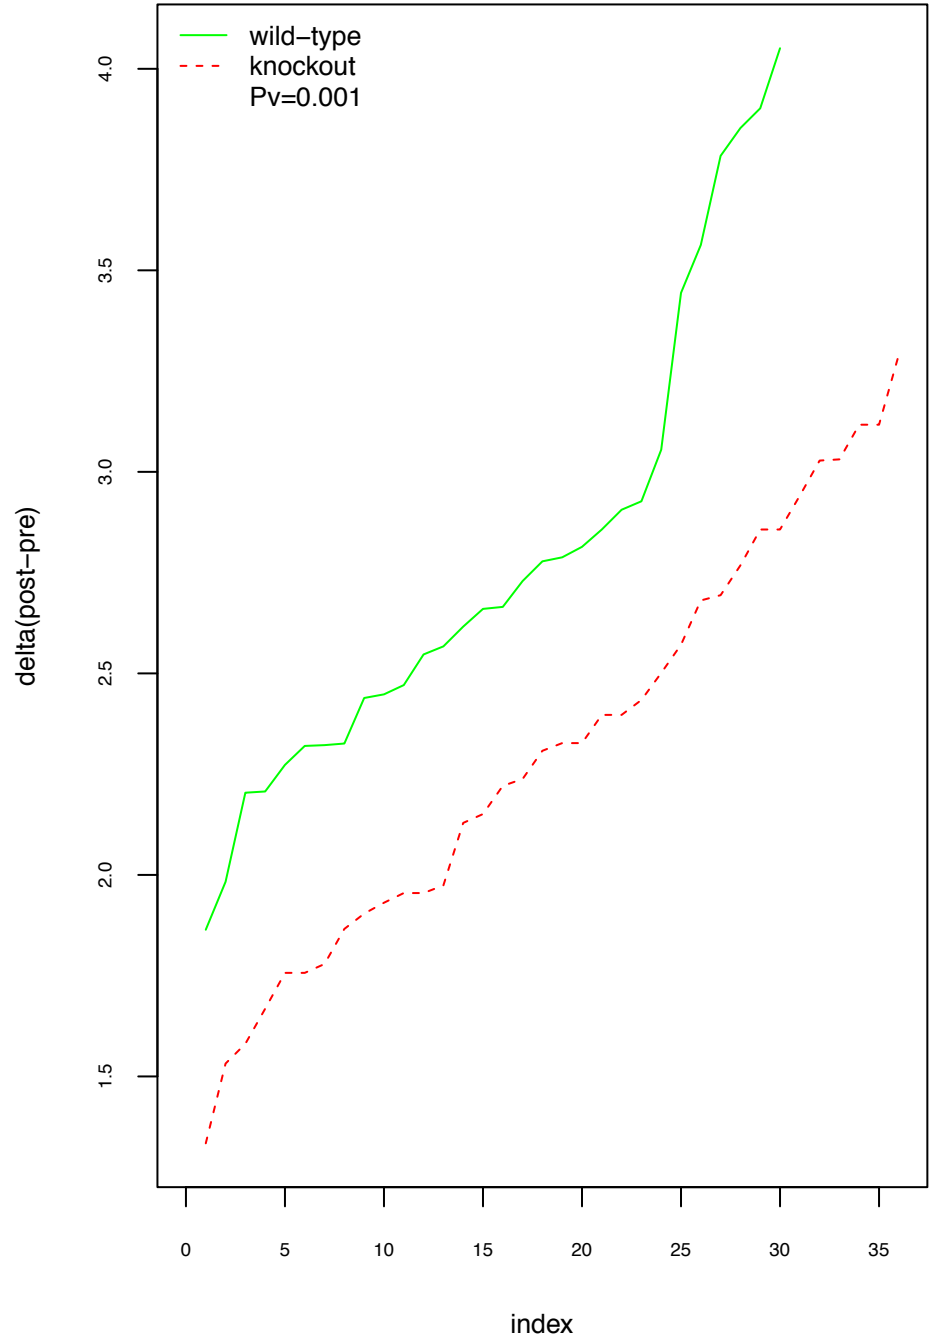

### Matn1

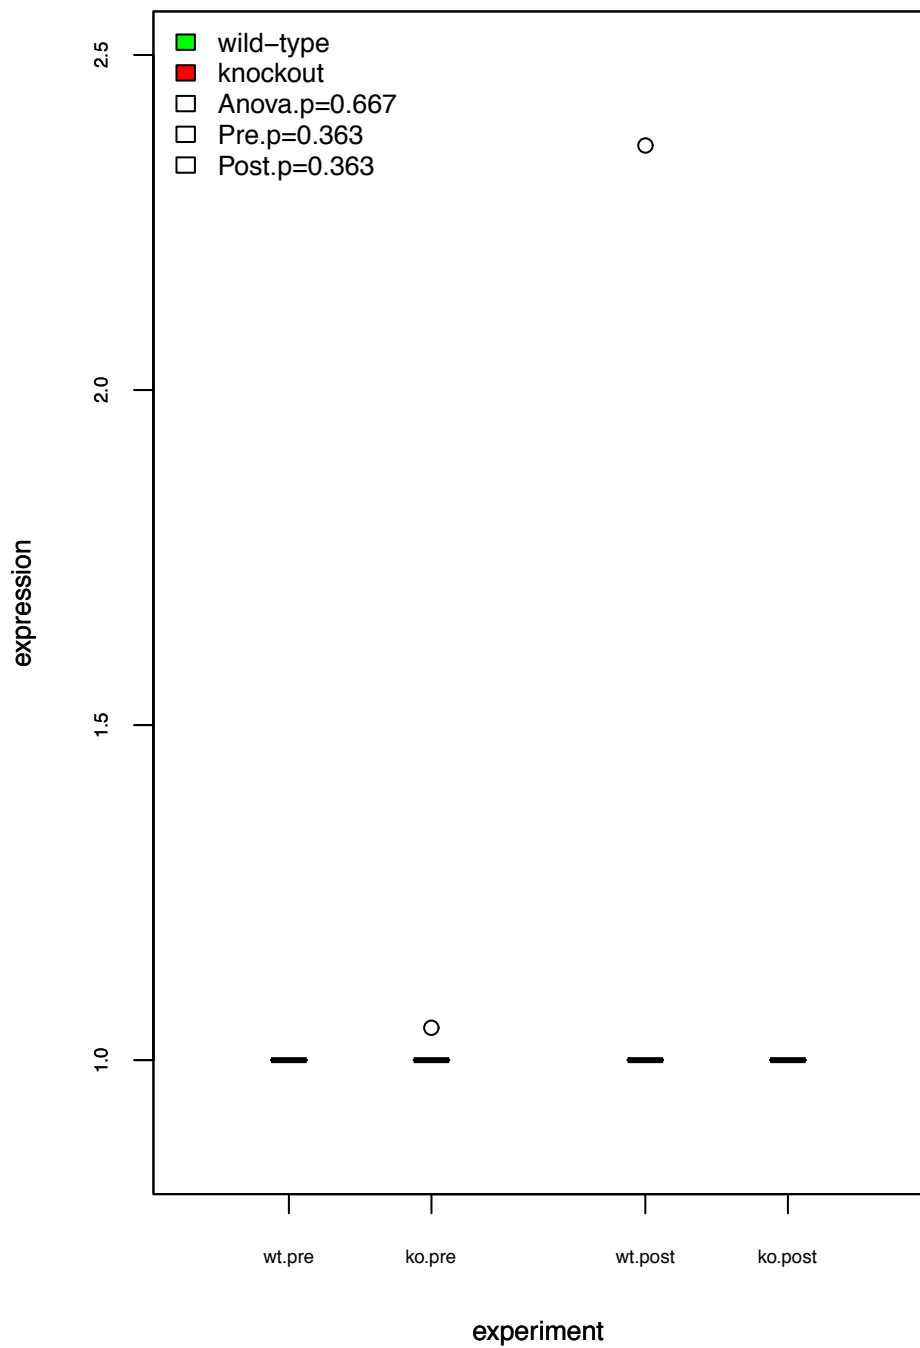

### Matn1

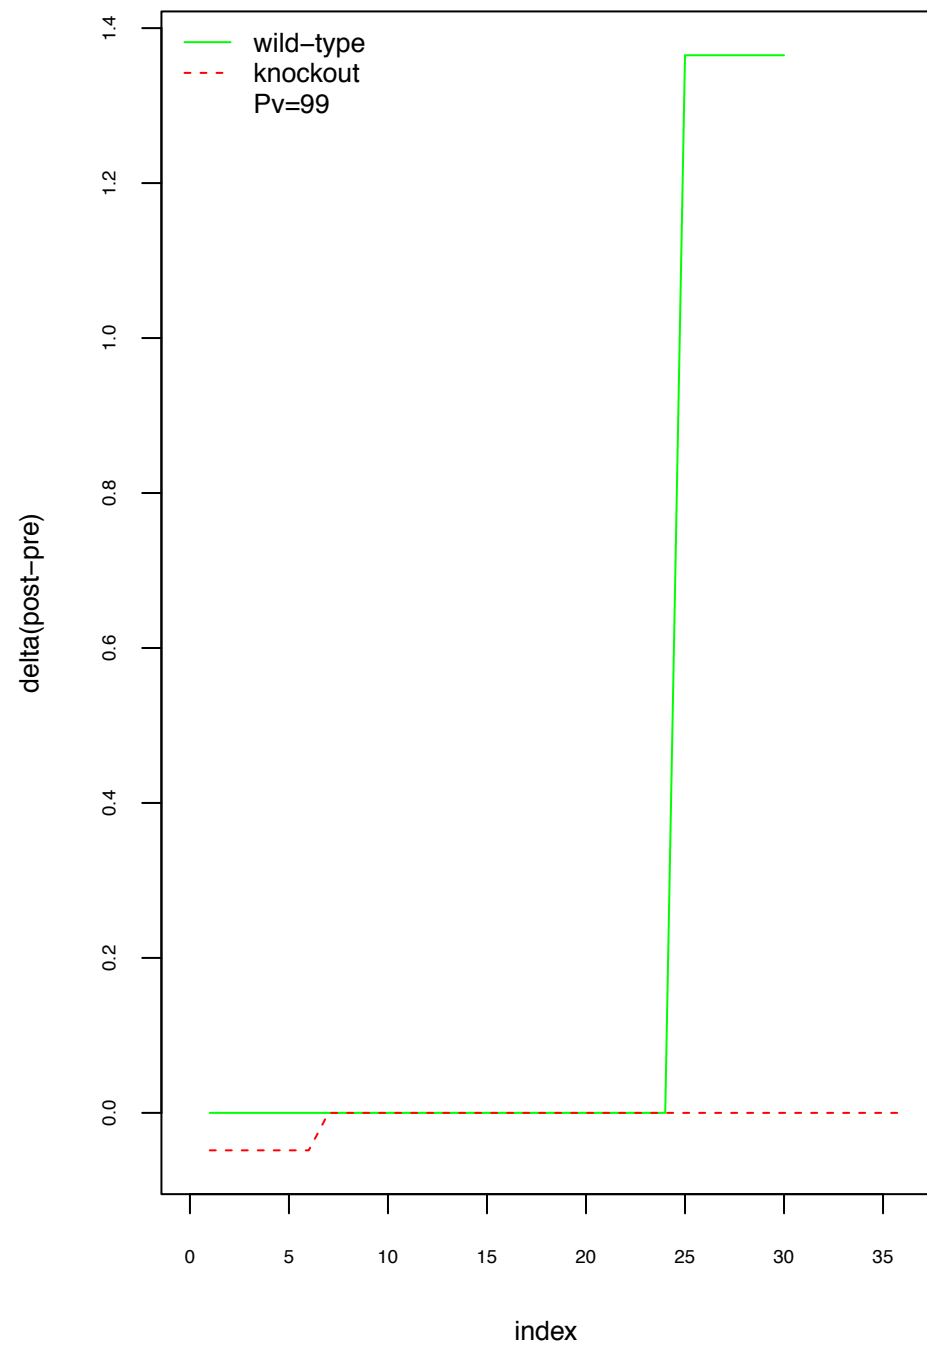



## Notch2

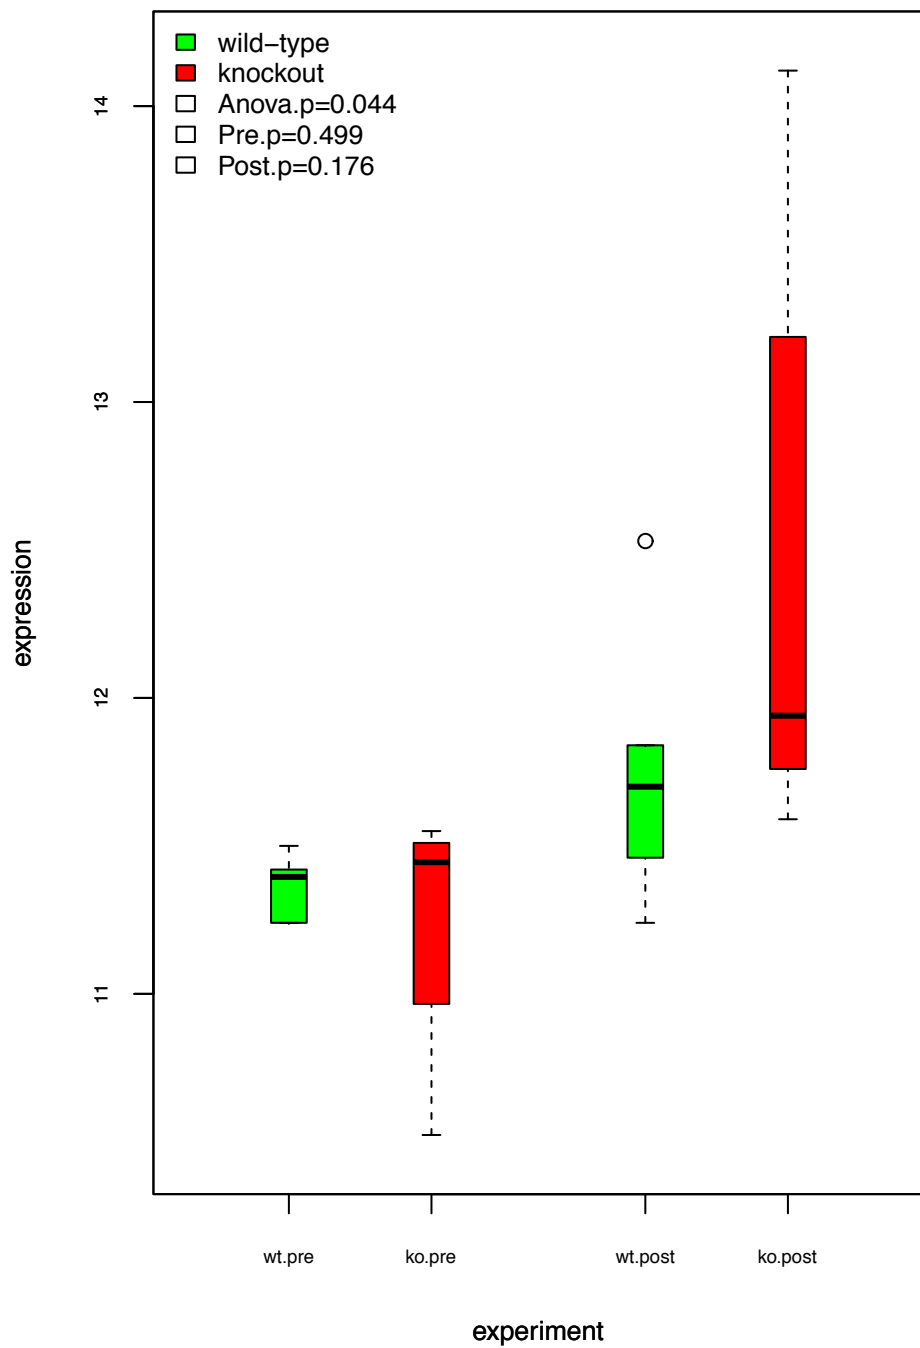

## Notch2

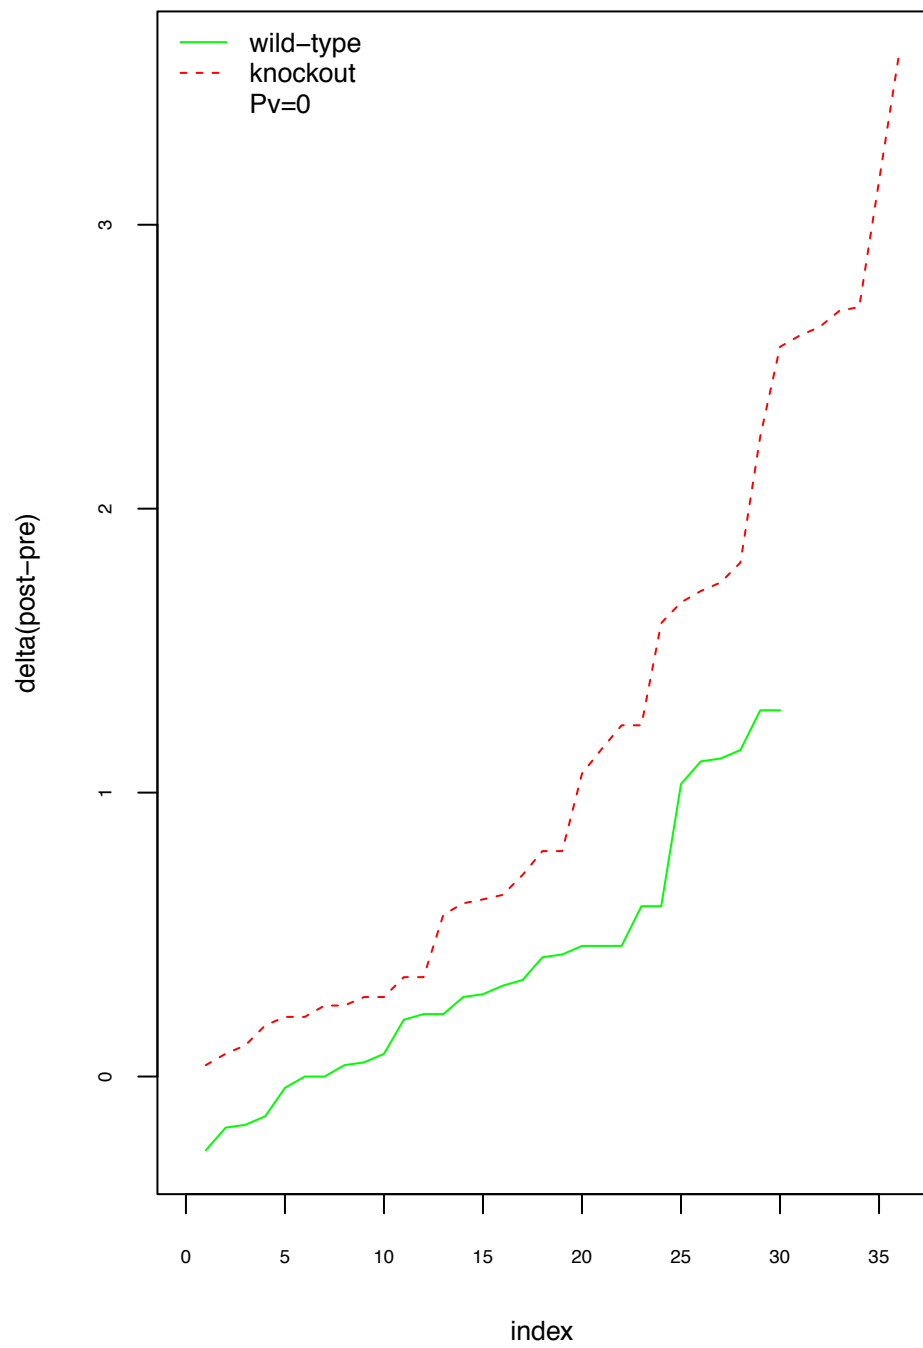

# Notch1

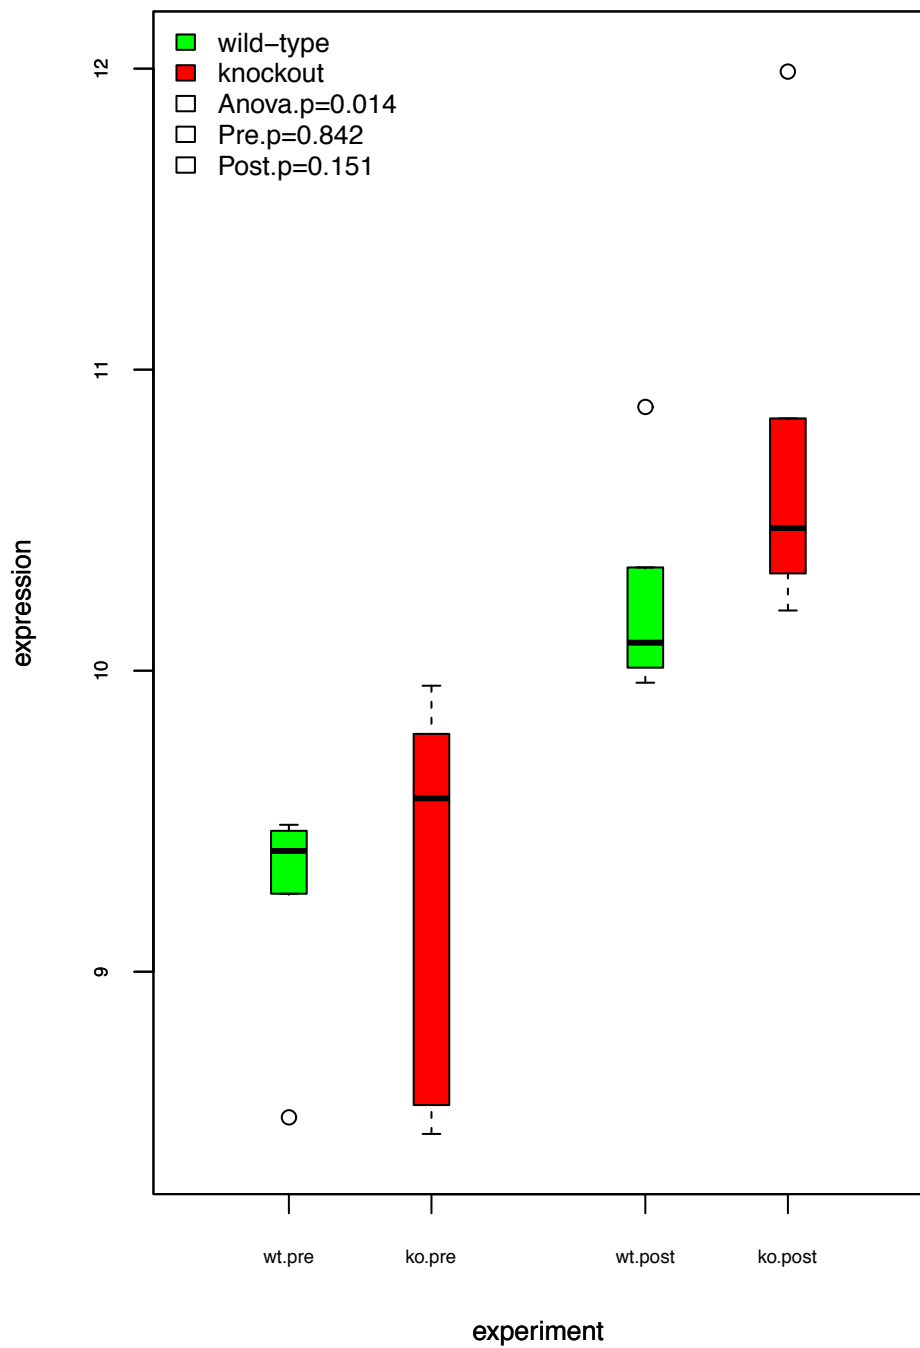

# Notch1

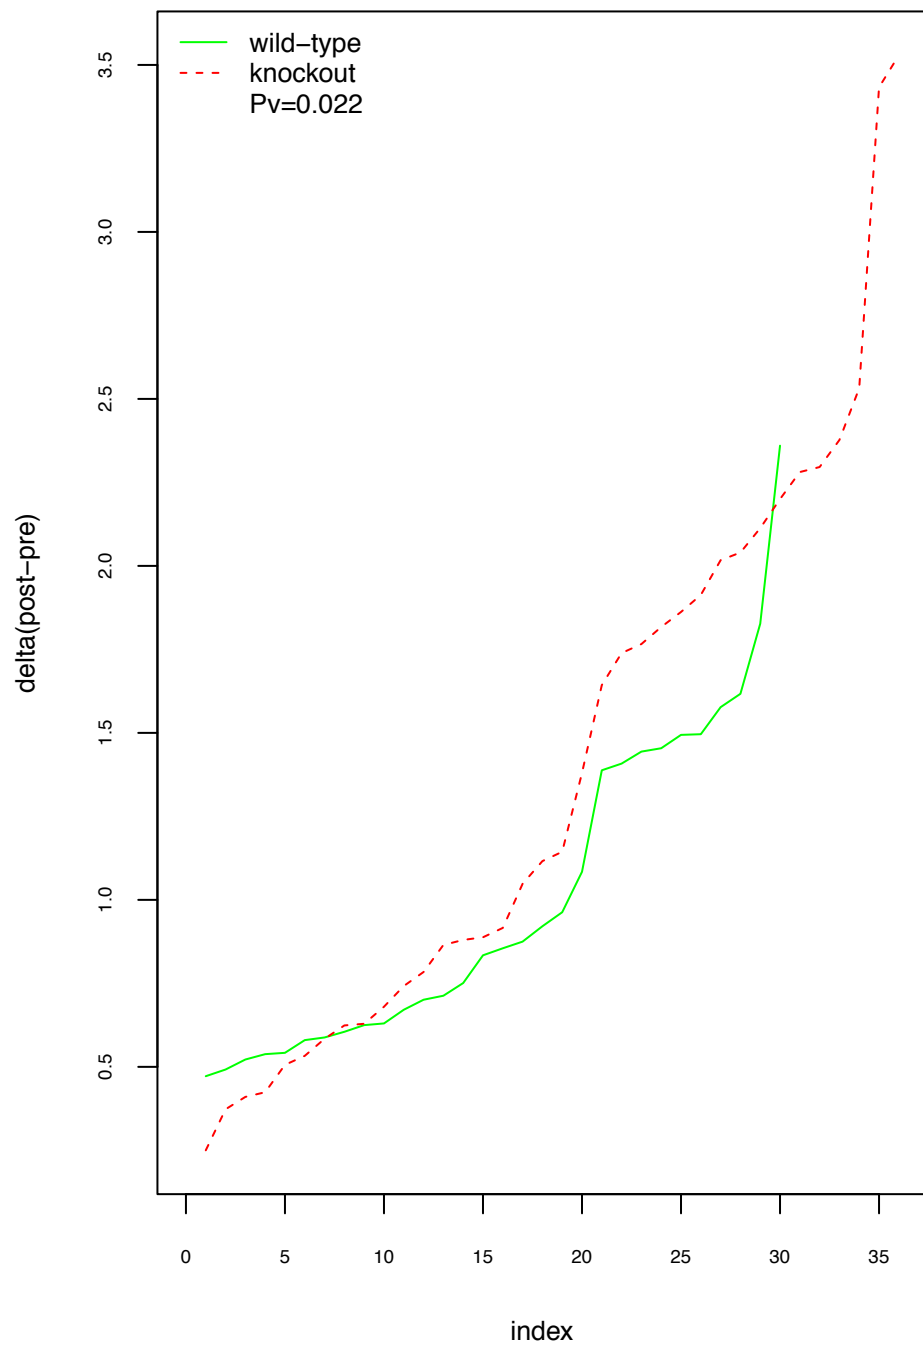

# Nog

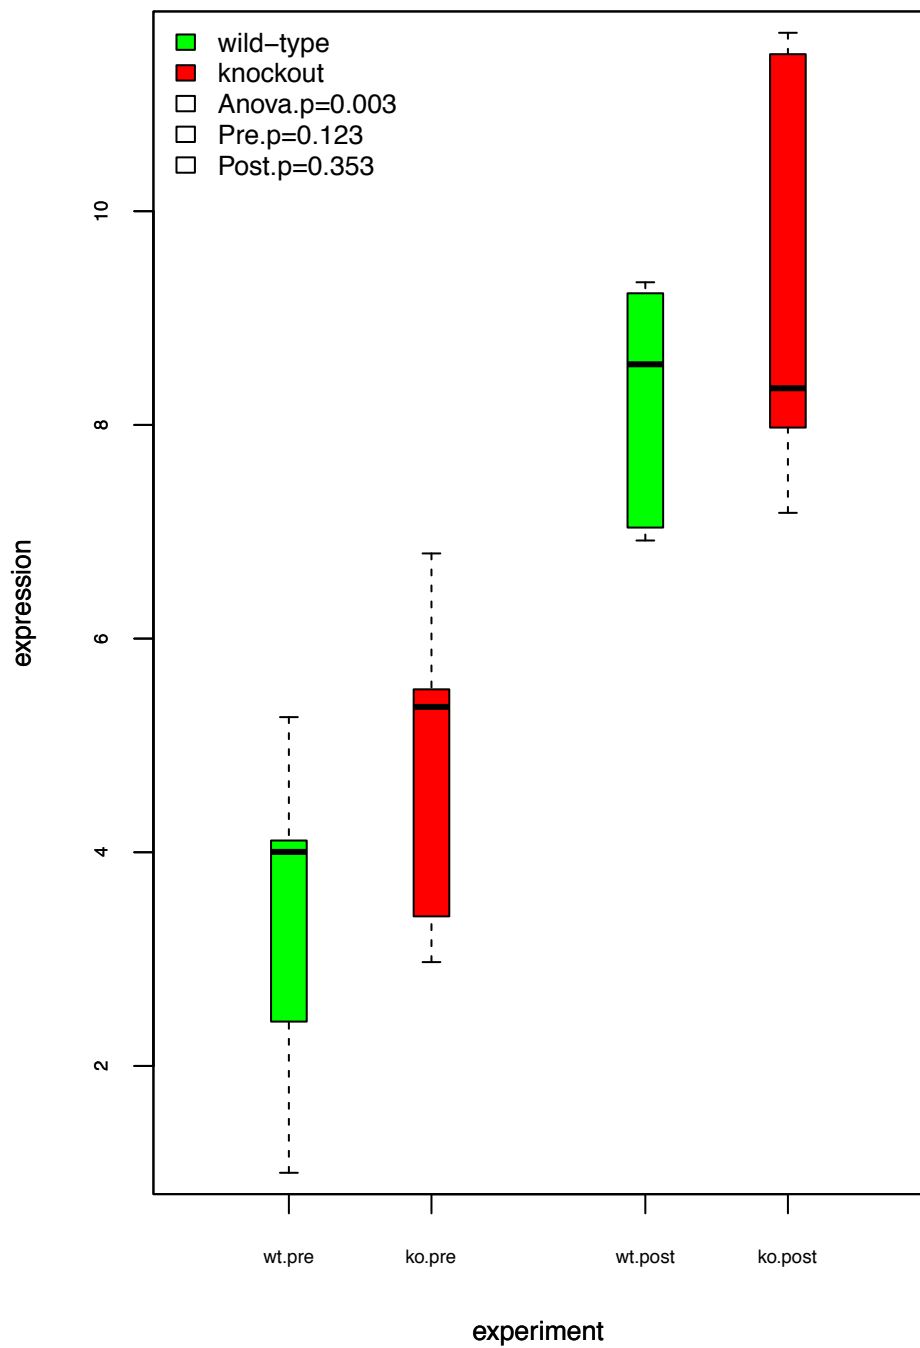

# Nog

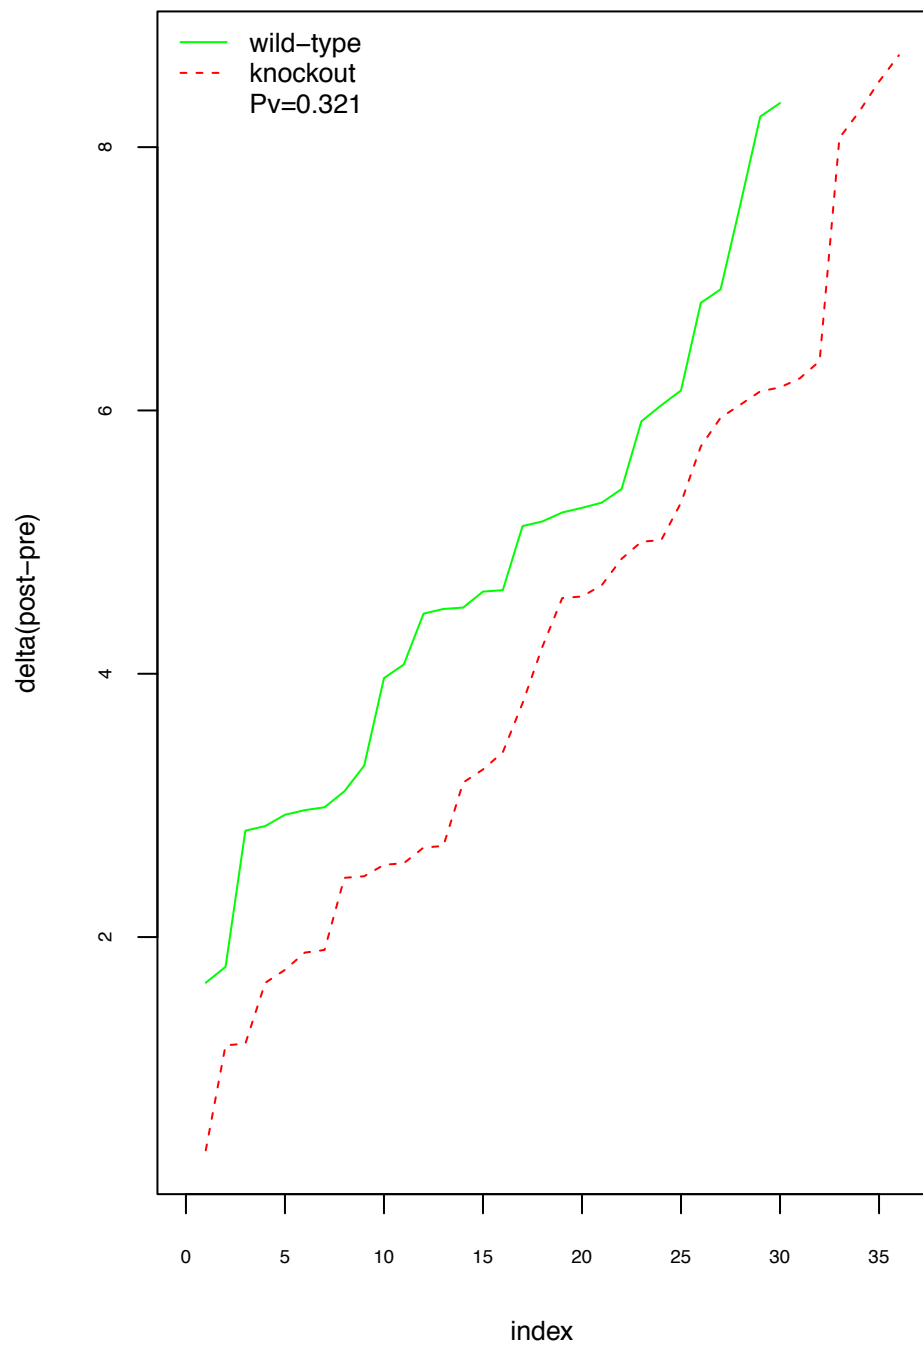

### Nanog



### Nanog

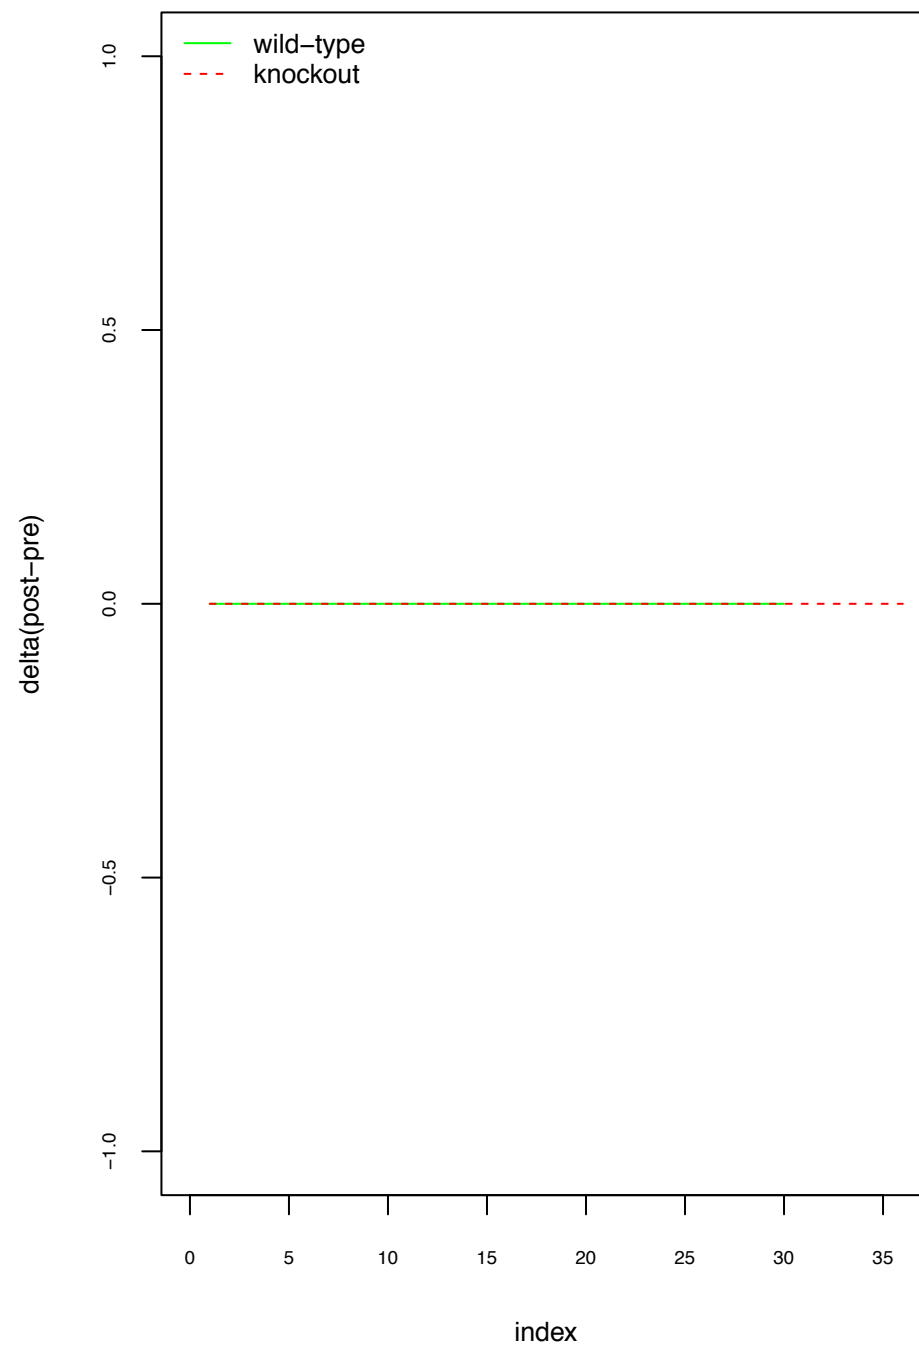

### Osx(Sp7)

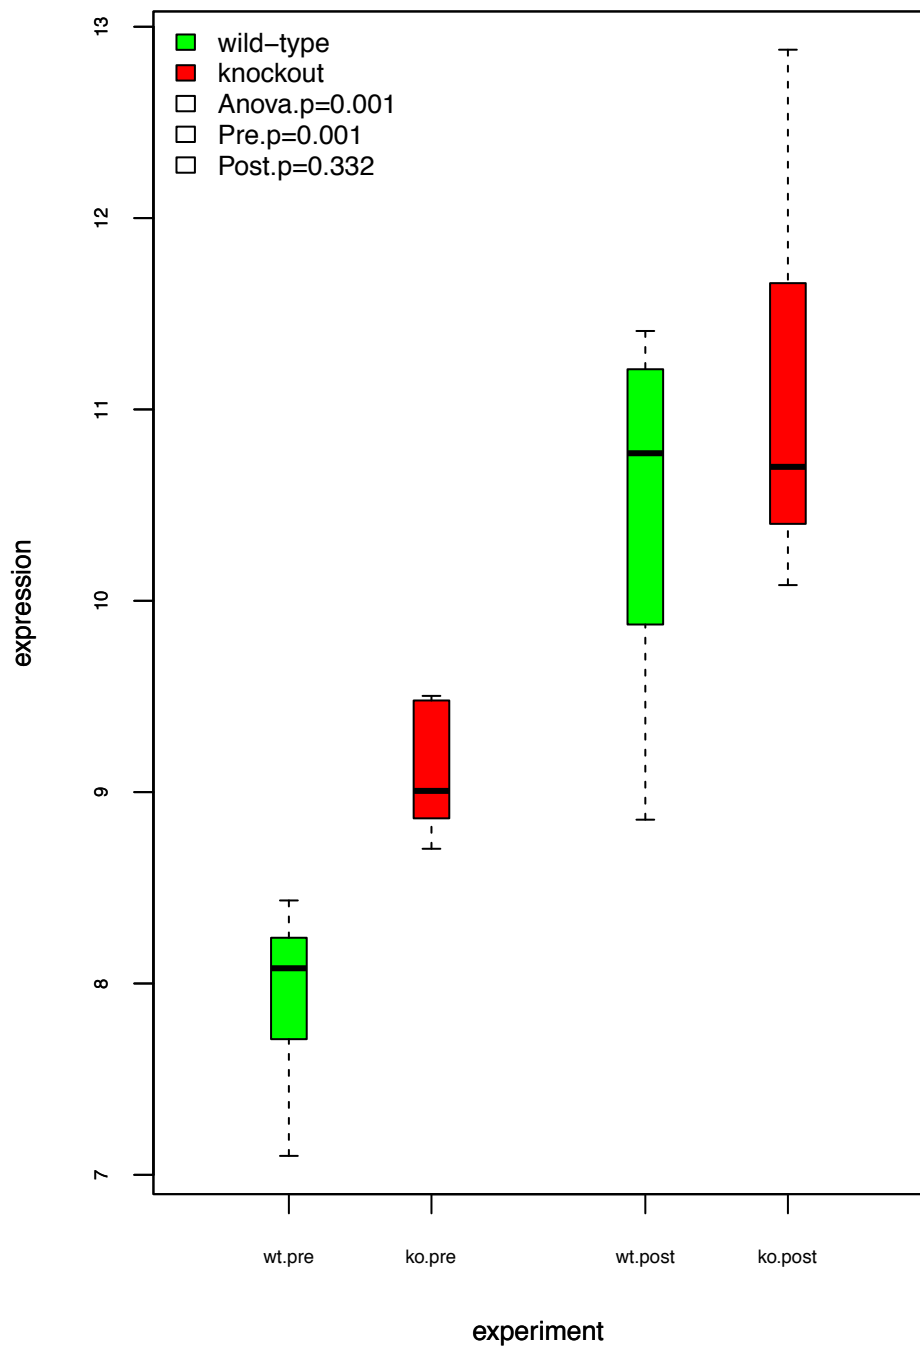

### Osx(Sp7)

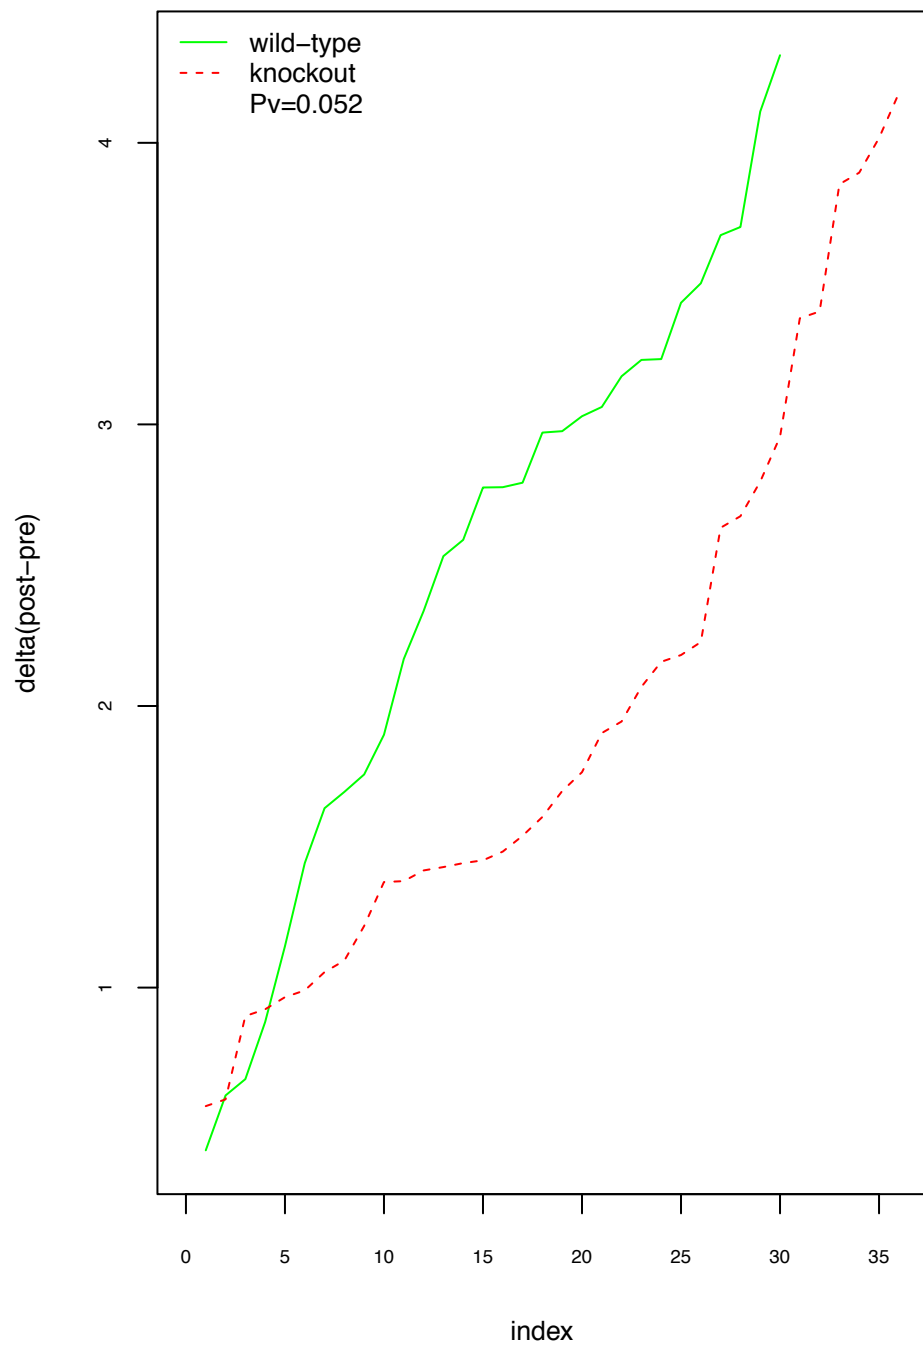

# OPG

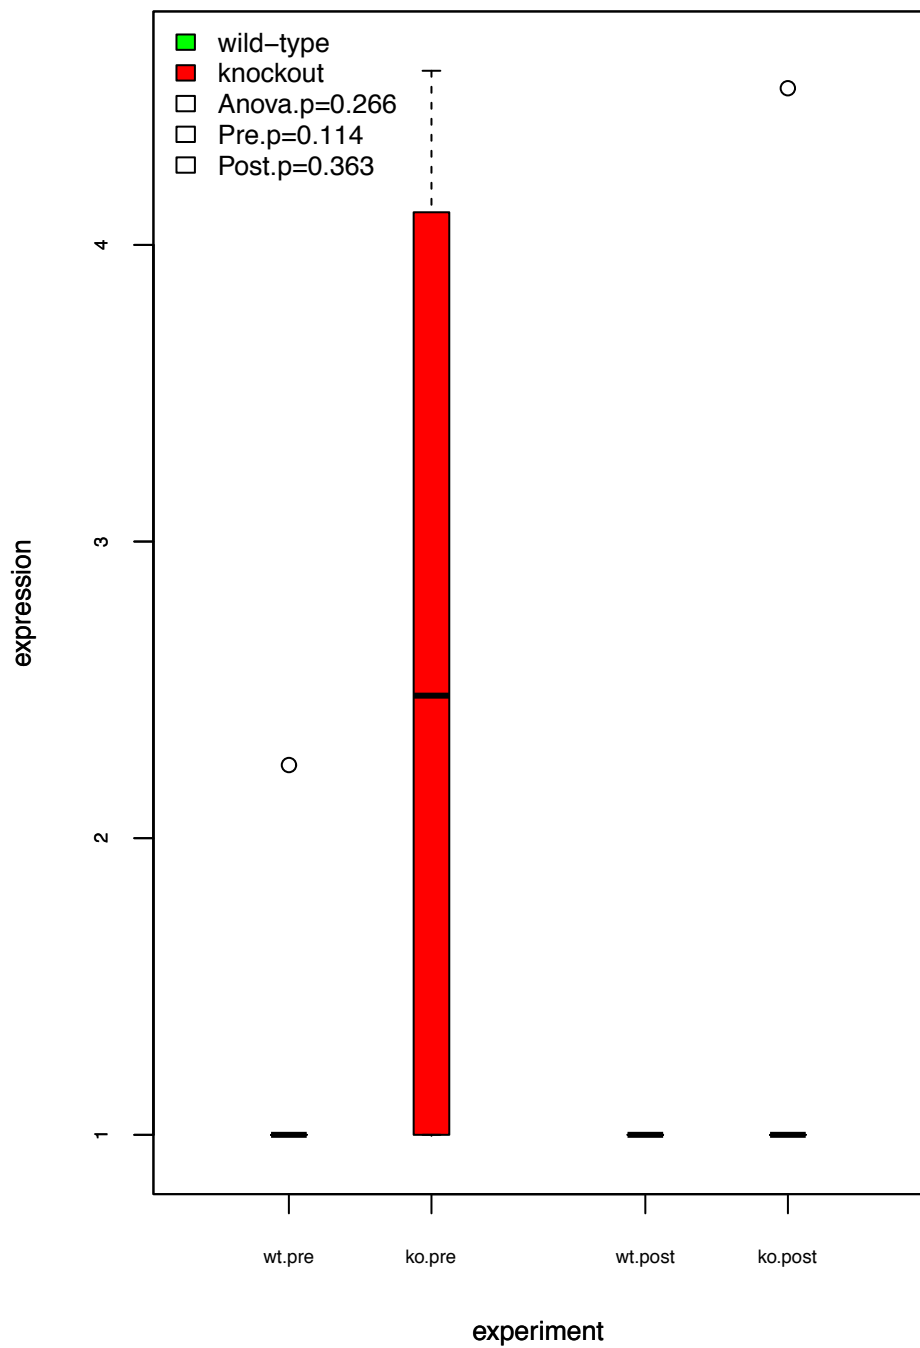

# OPG

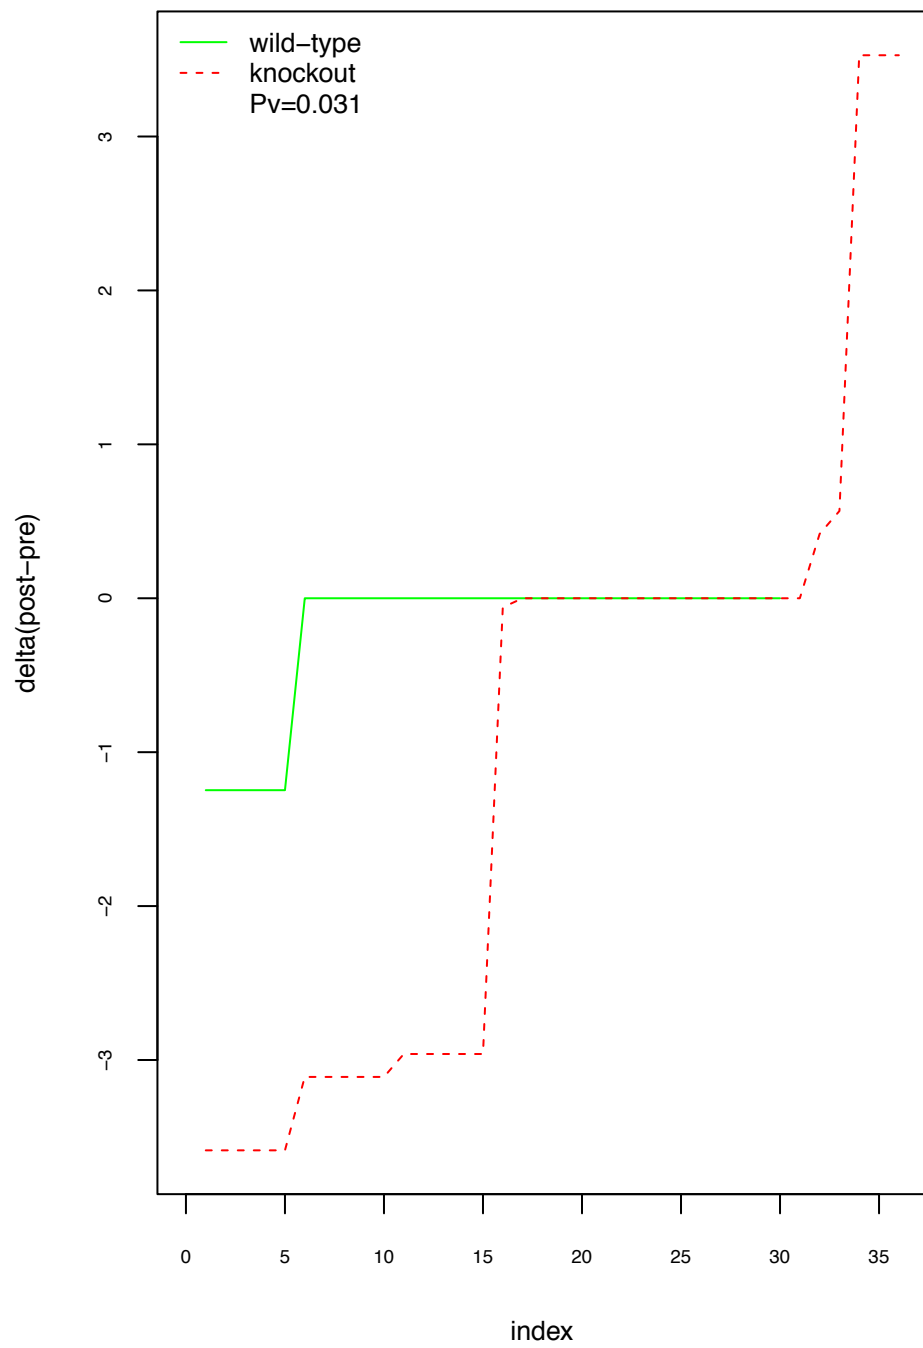

### PTHrP

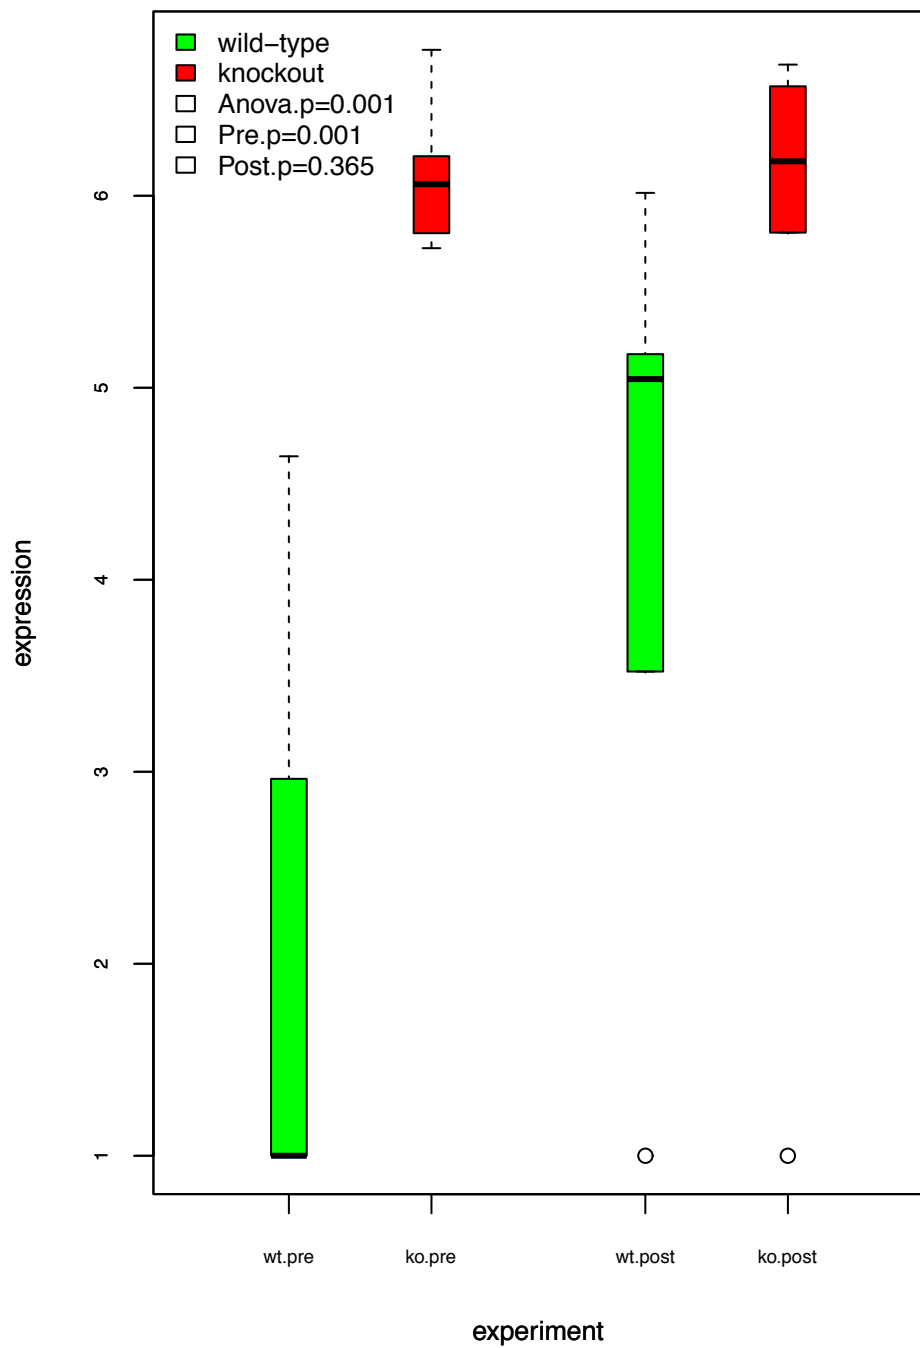

### PTHrP

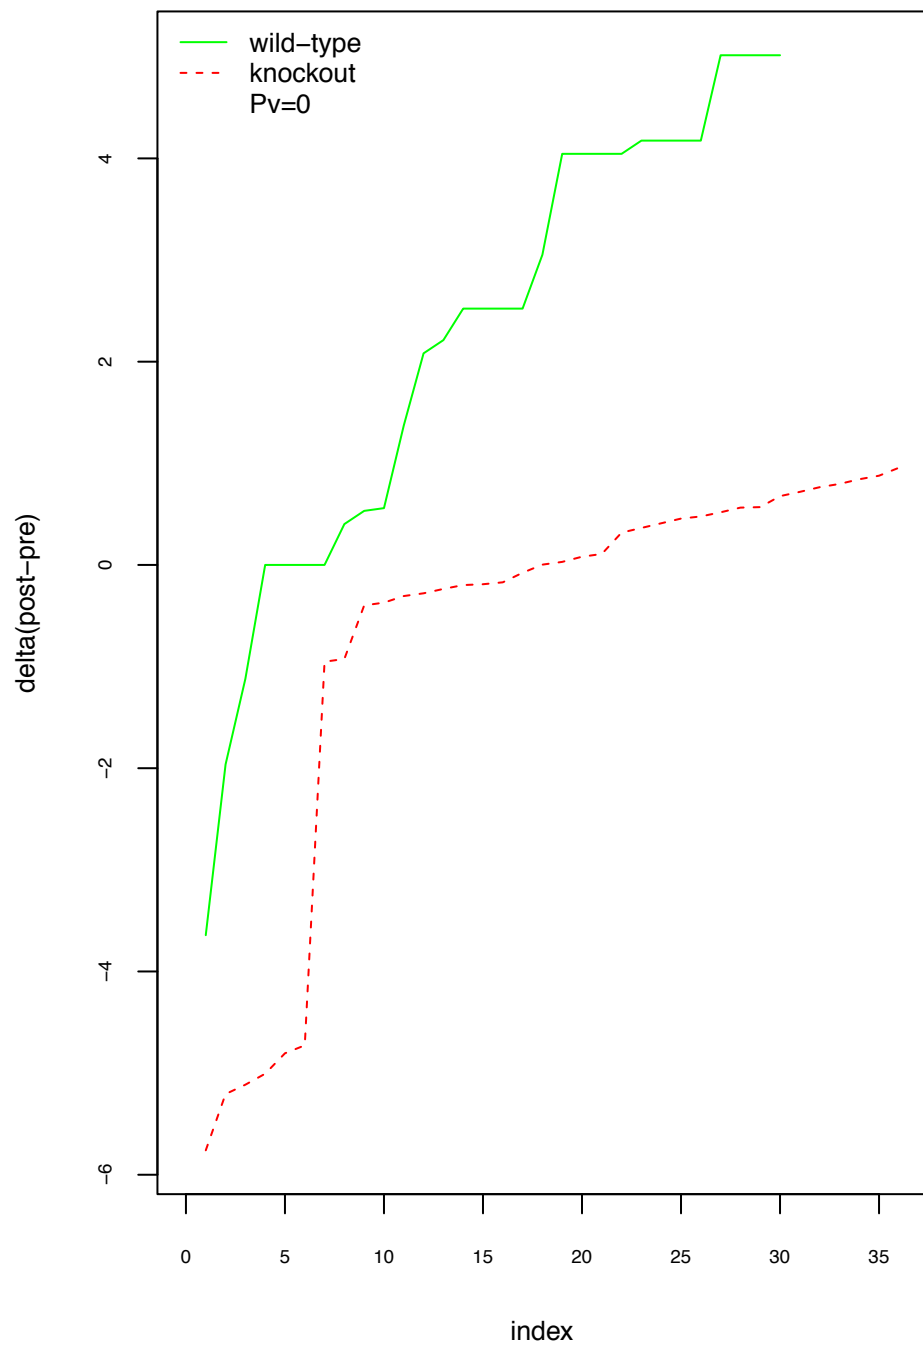

# Pth1r

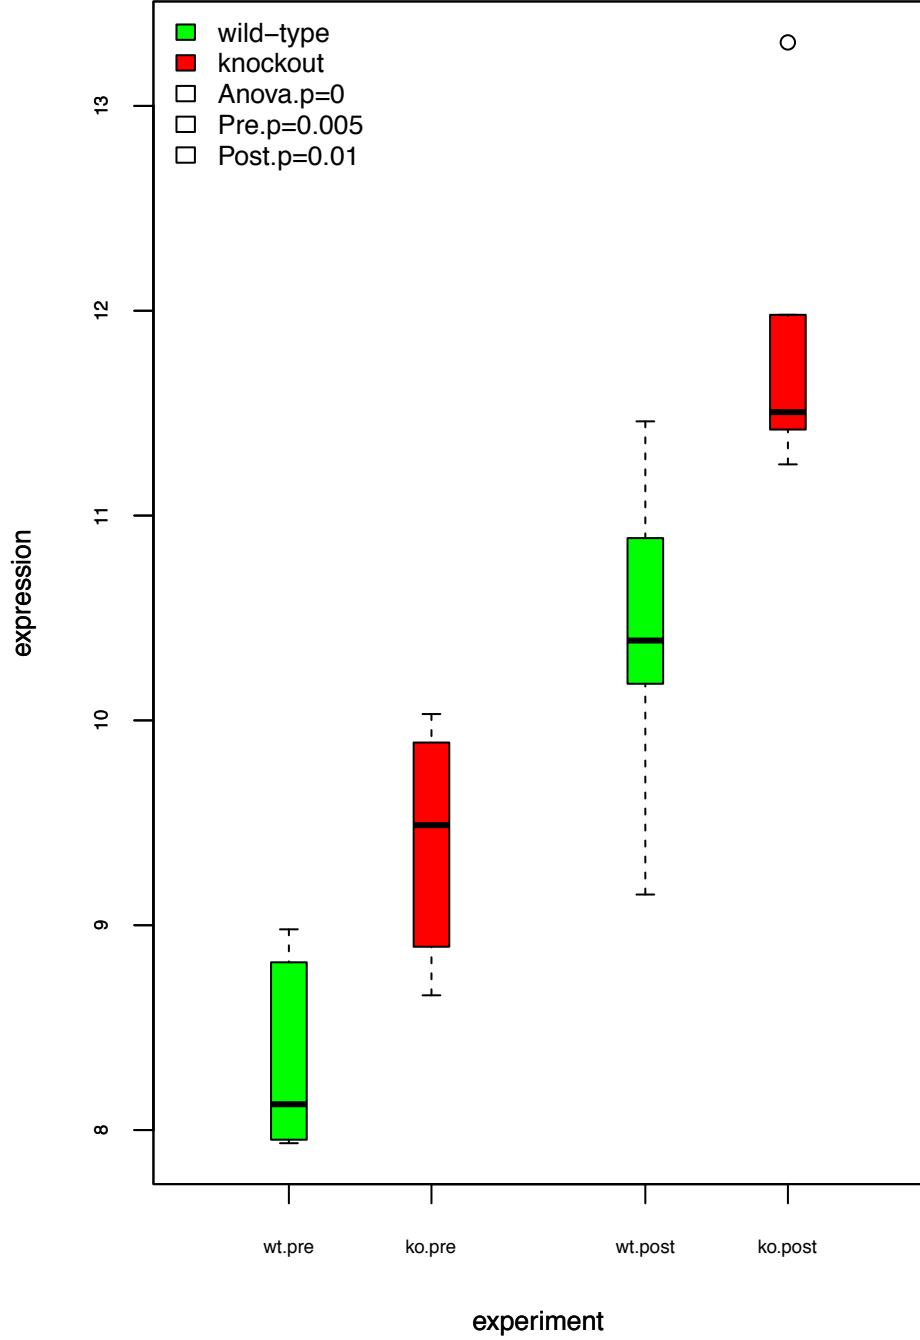

# Pth1r

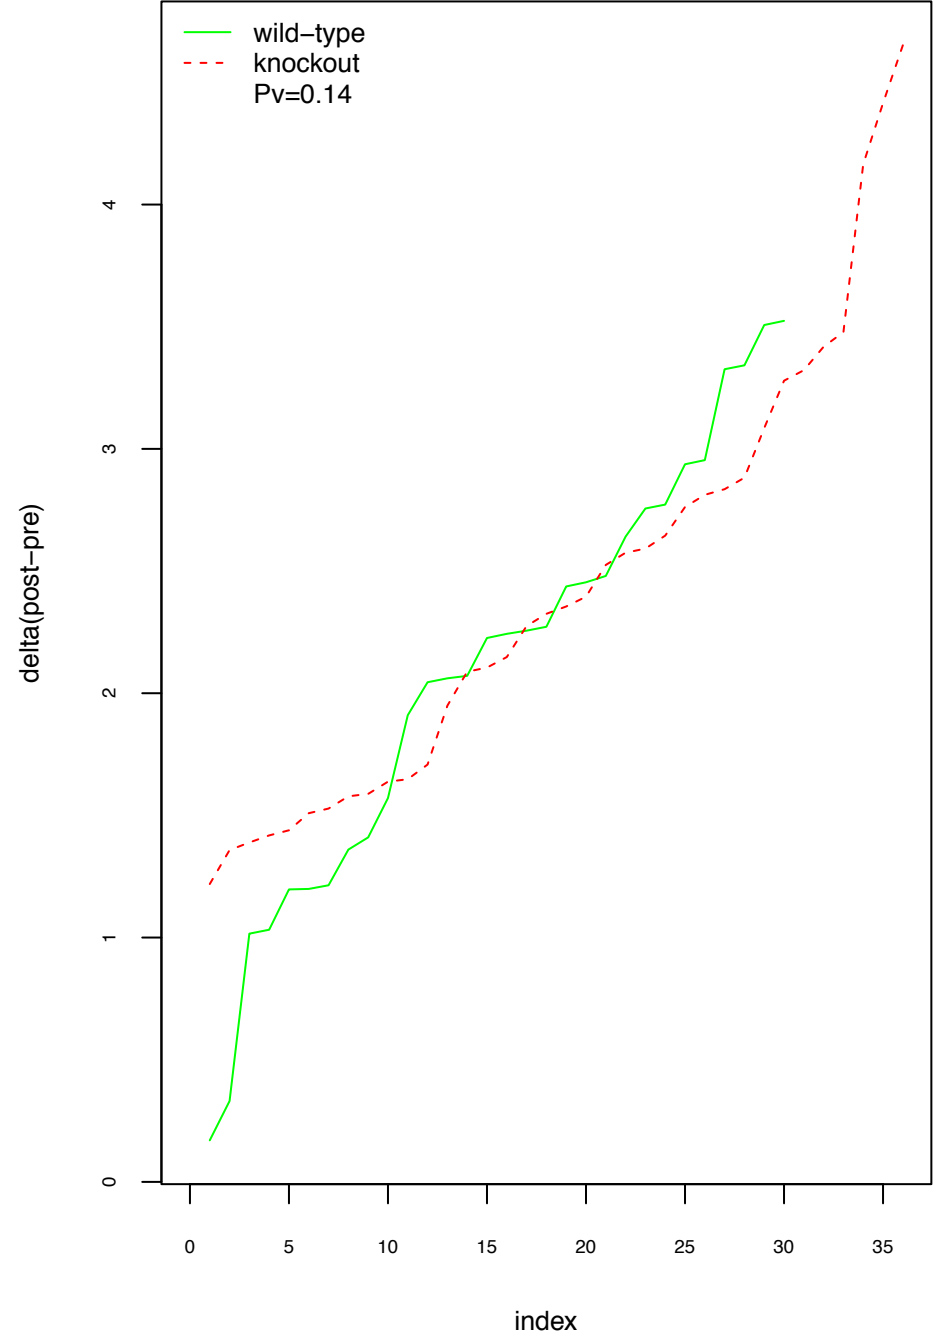



### Pten

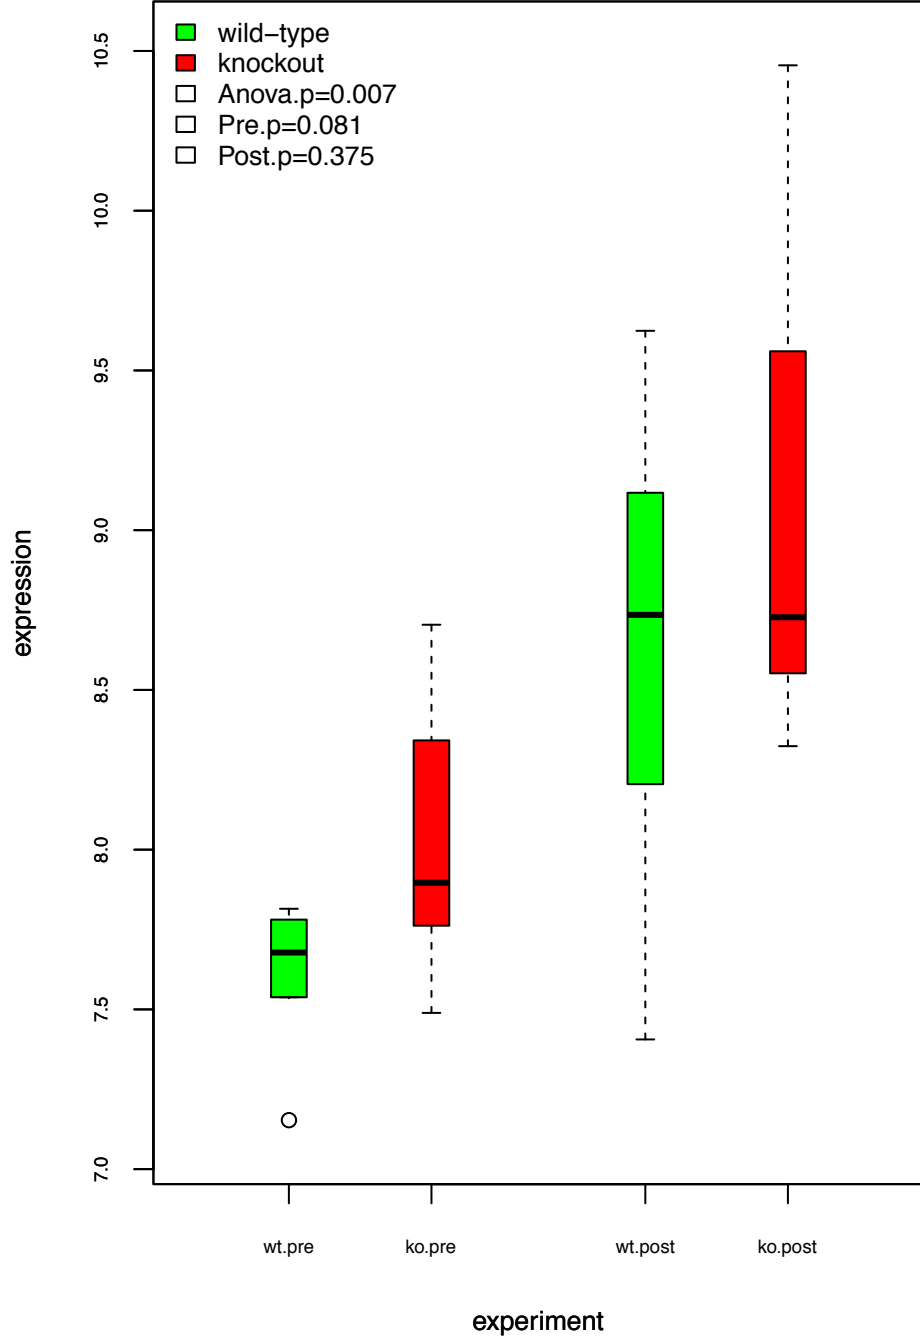

### Pten

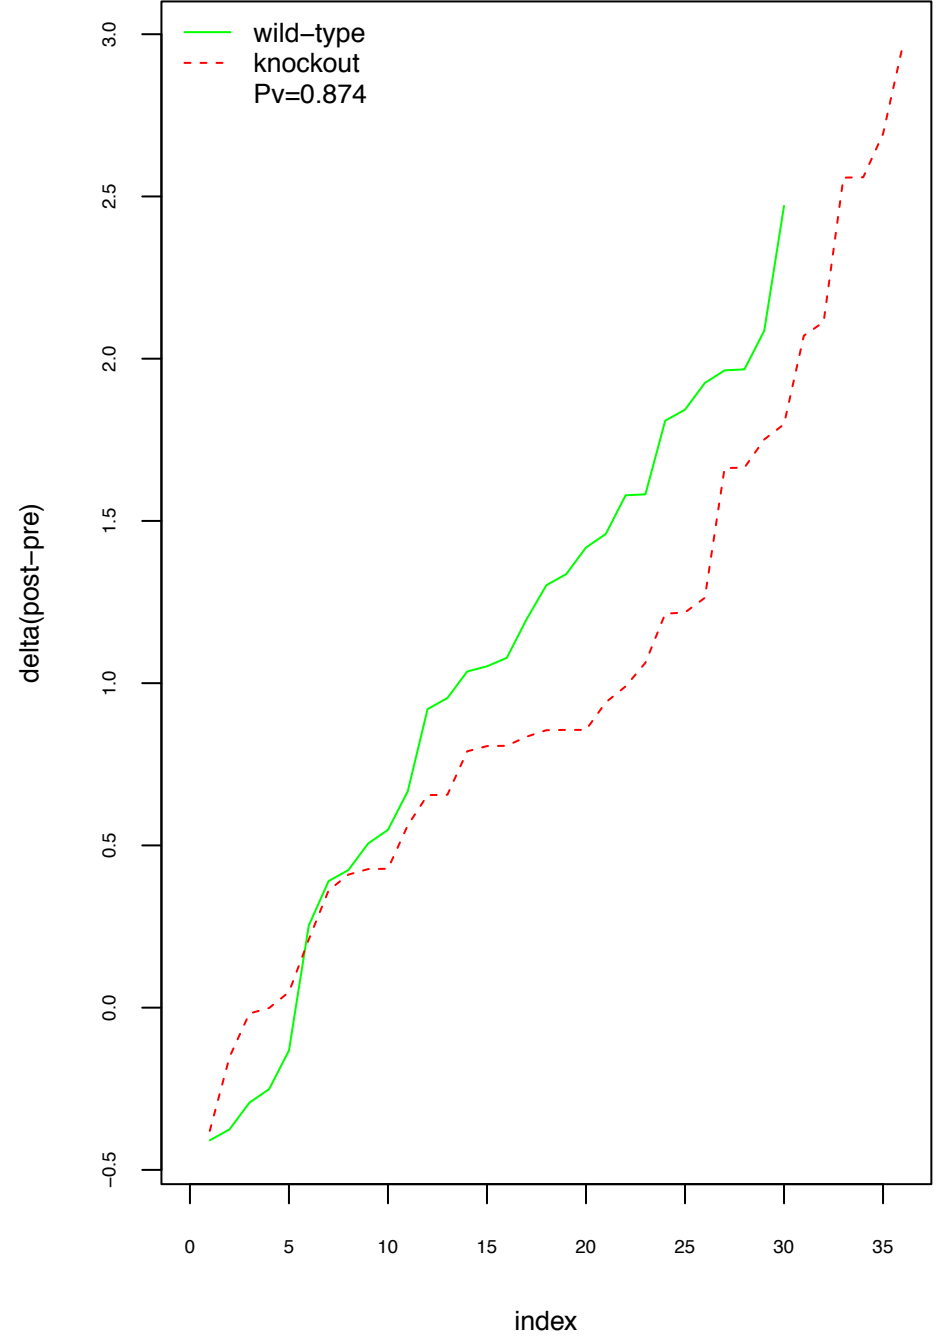

### Ptch1

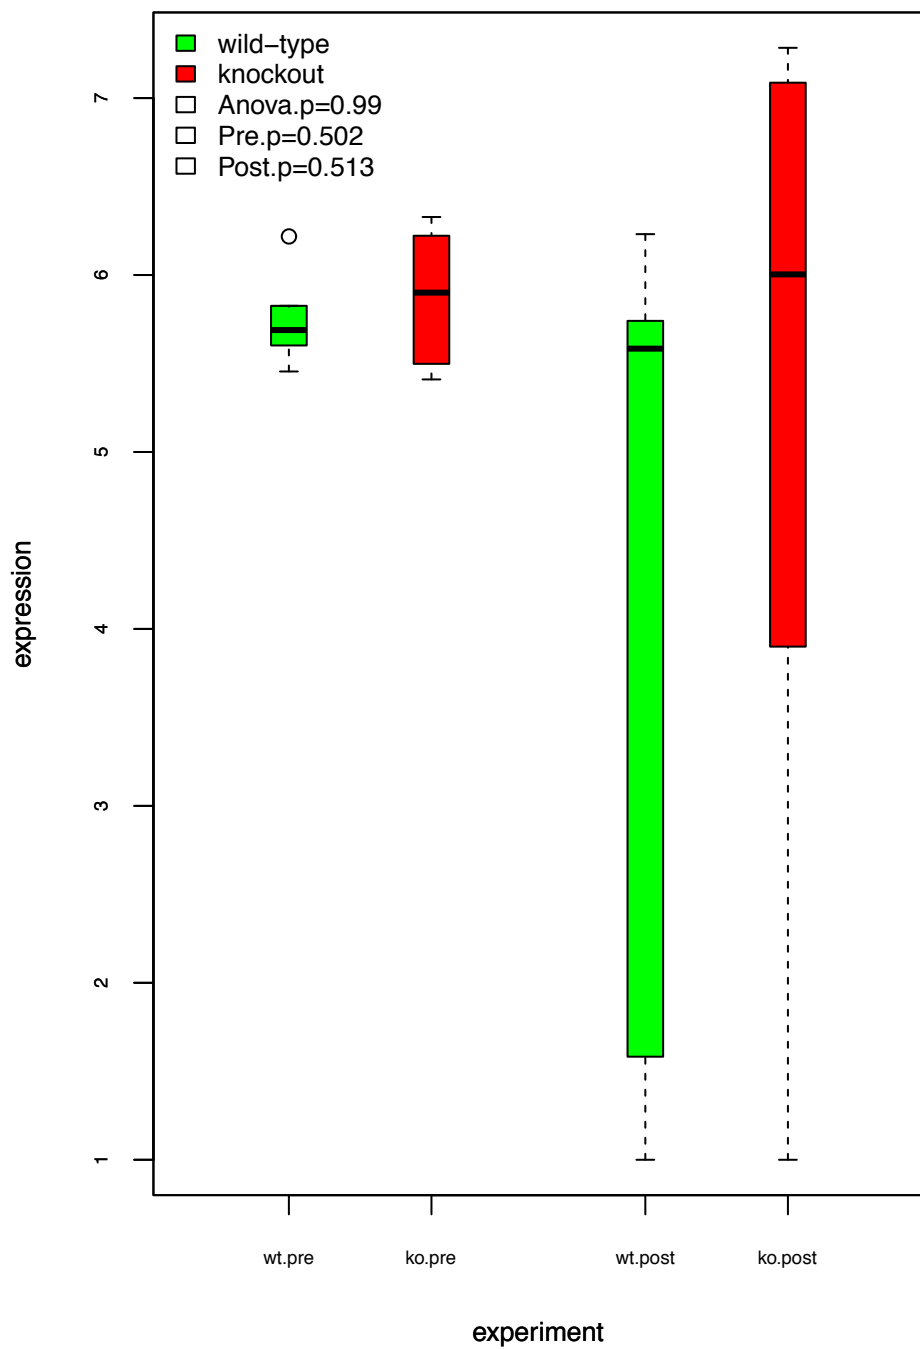

### Ptch1

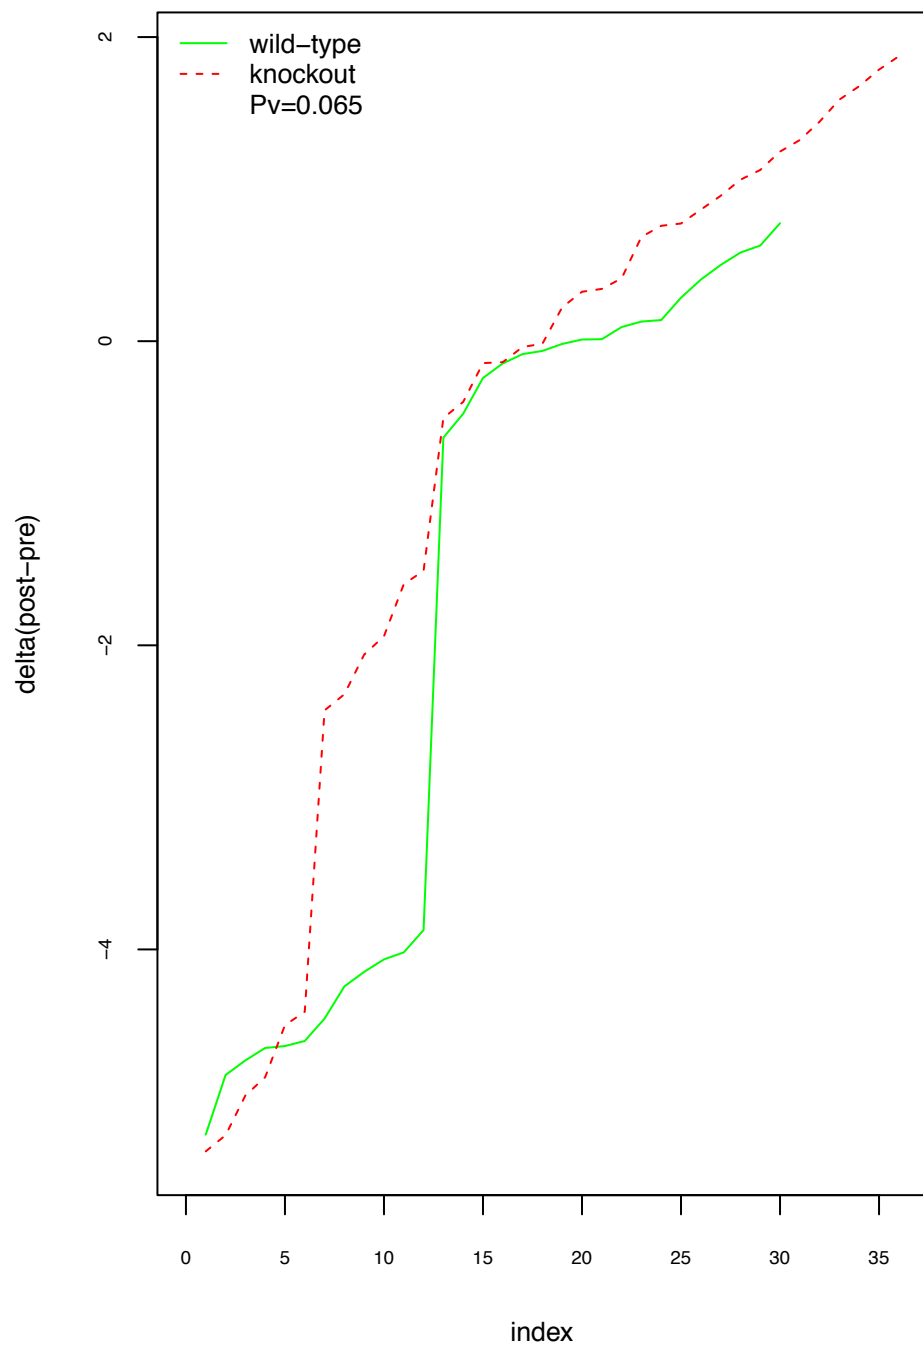

# Prrx1

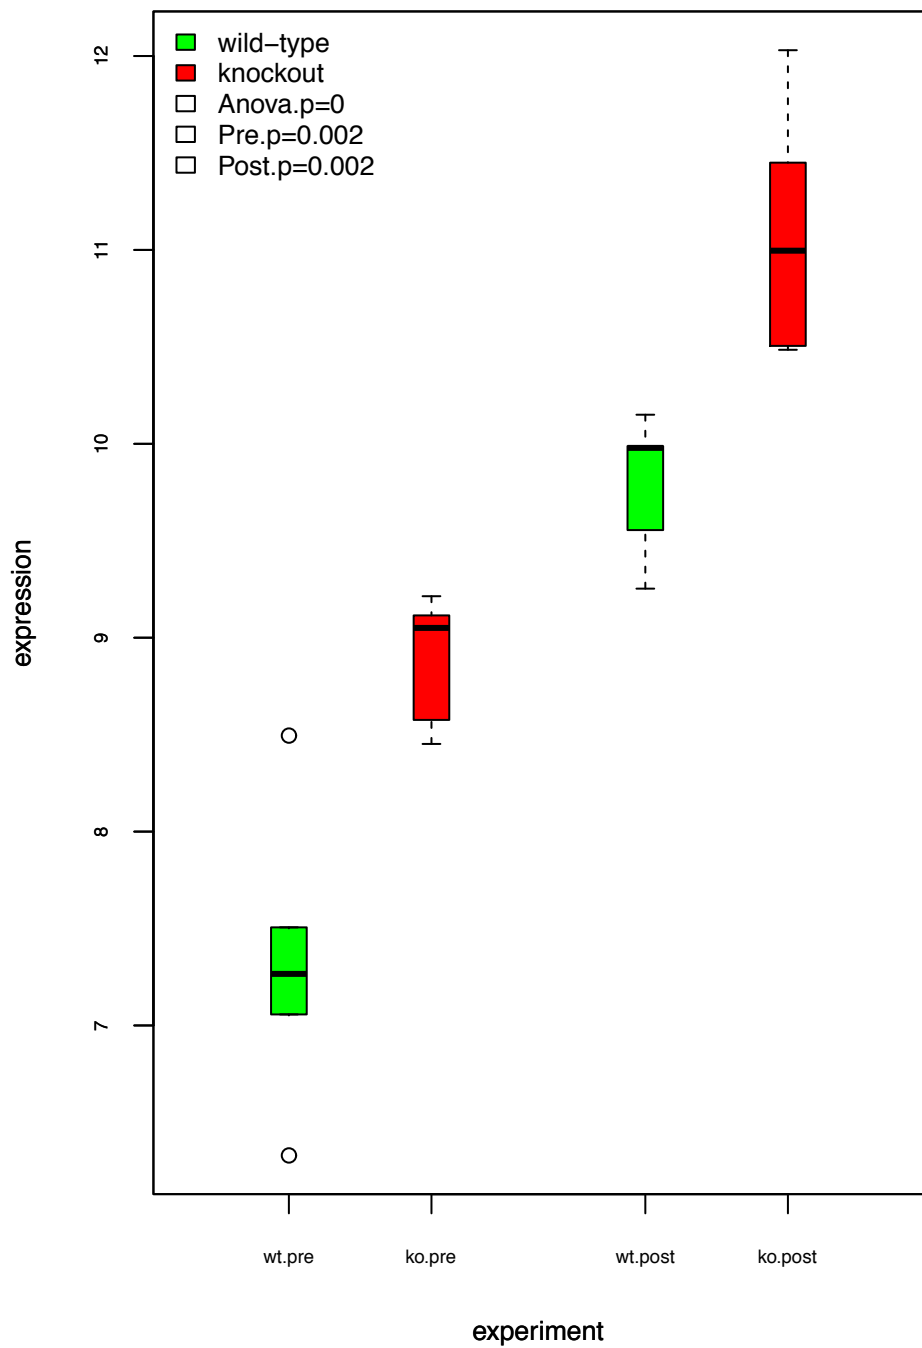

# Prrx1

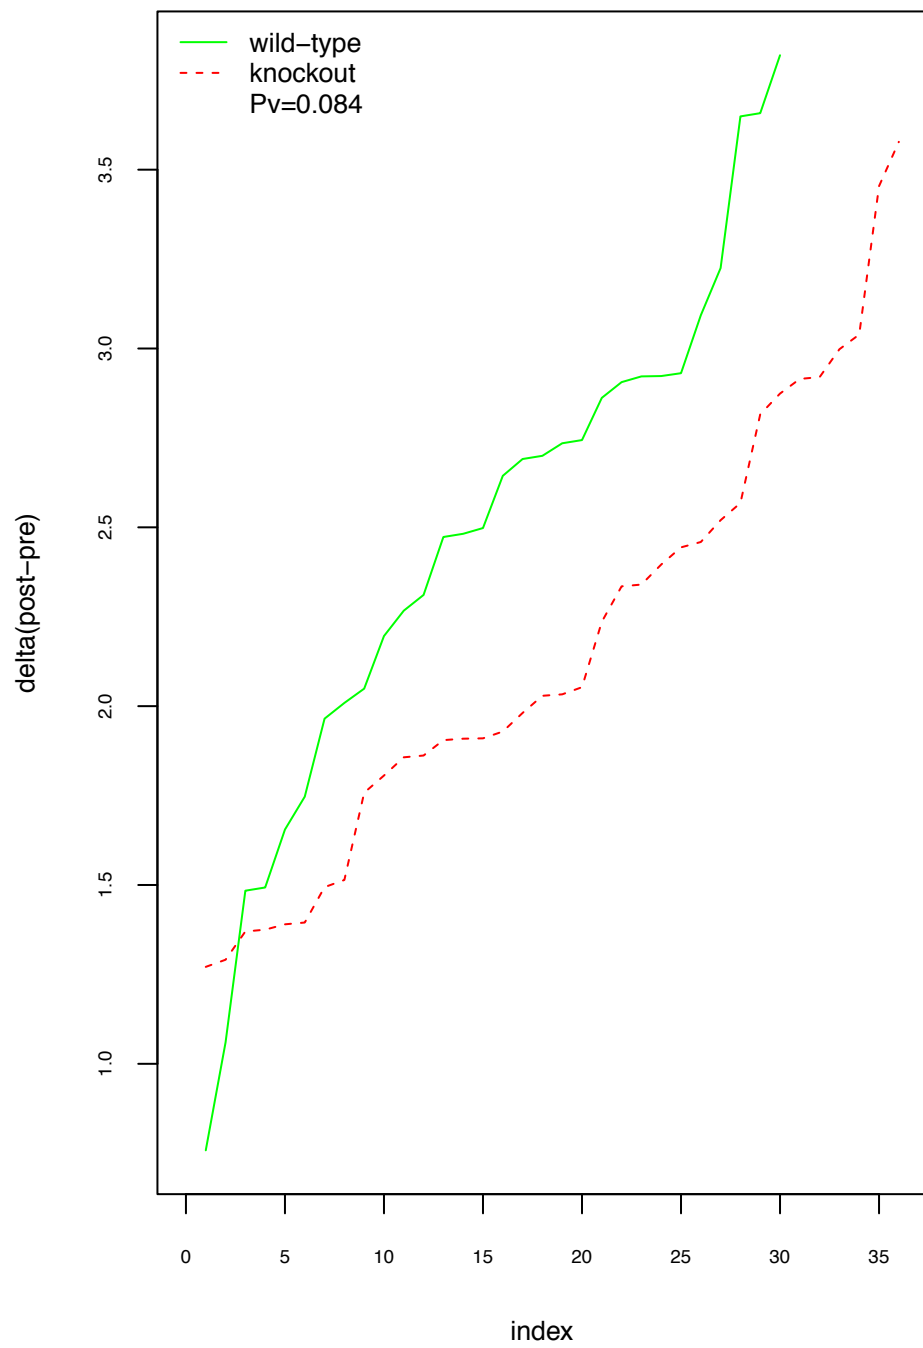

### Prg4

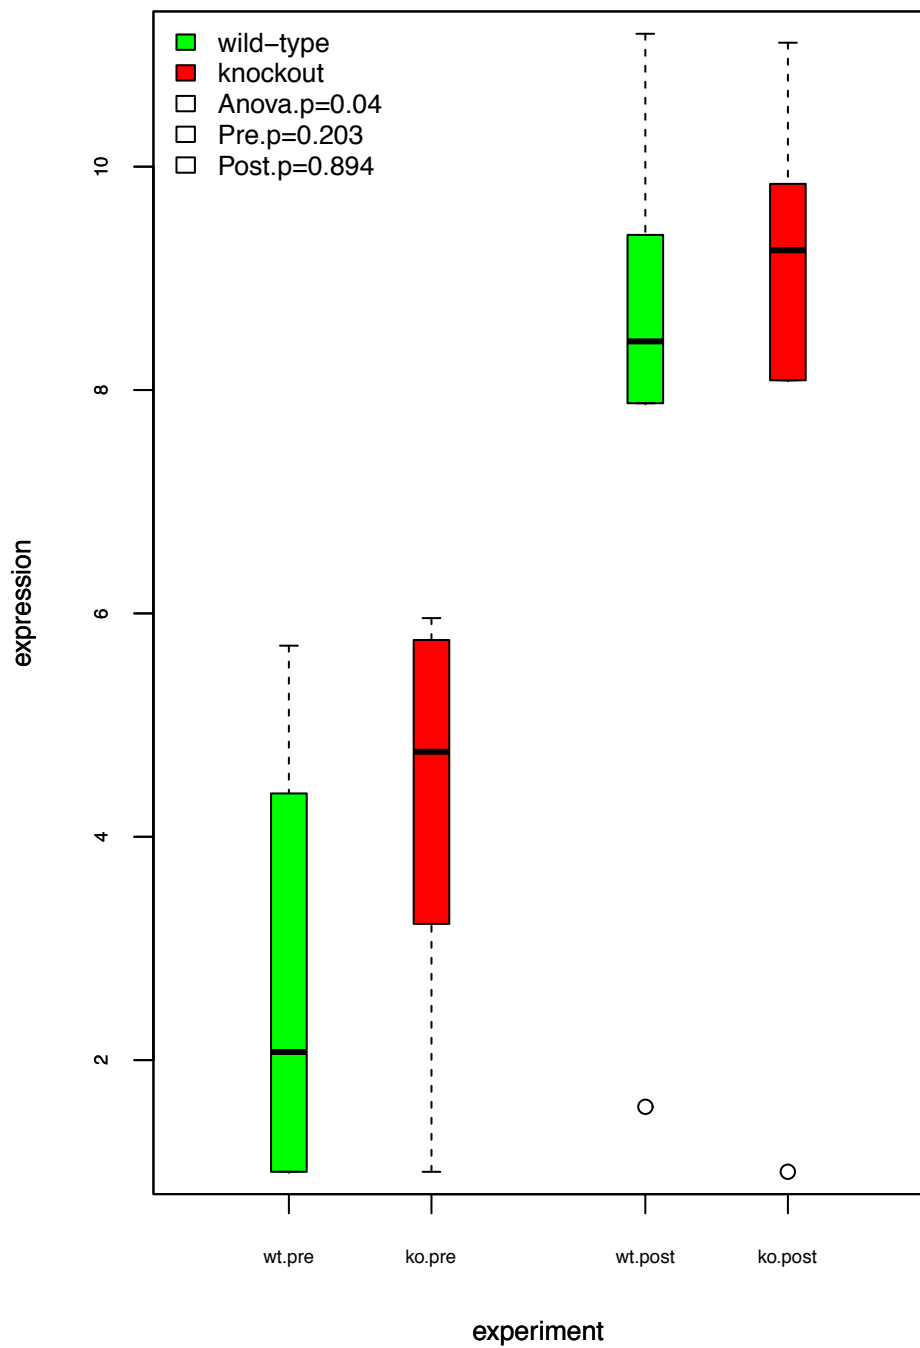

### Prg4

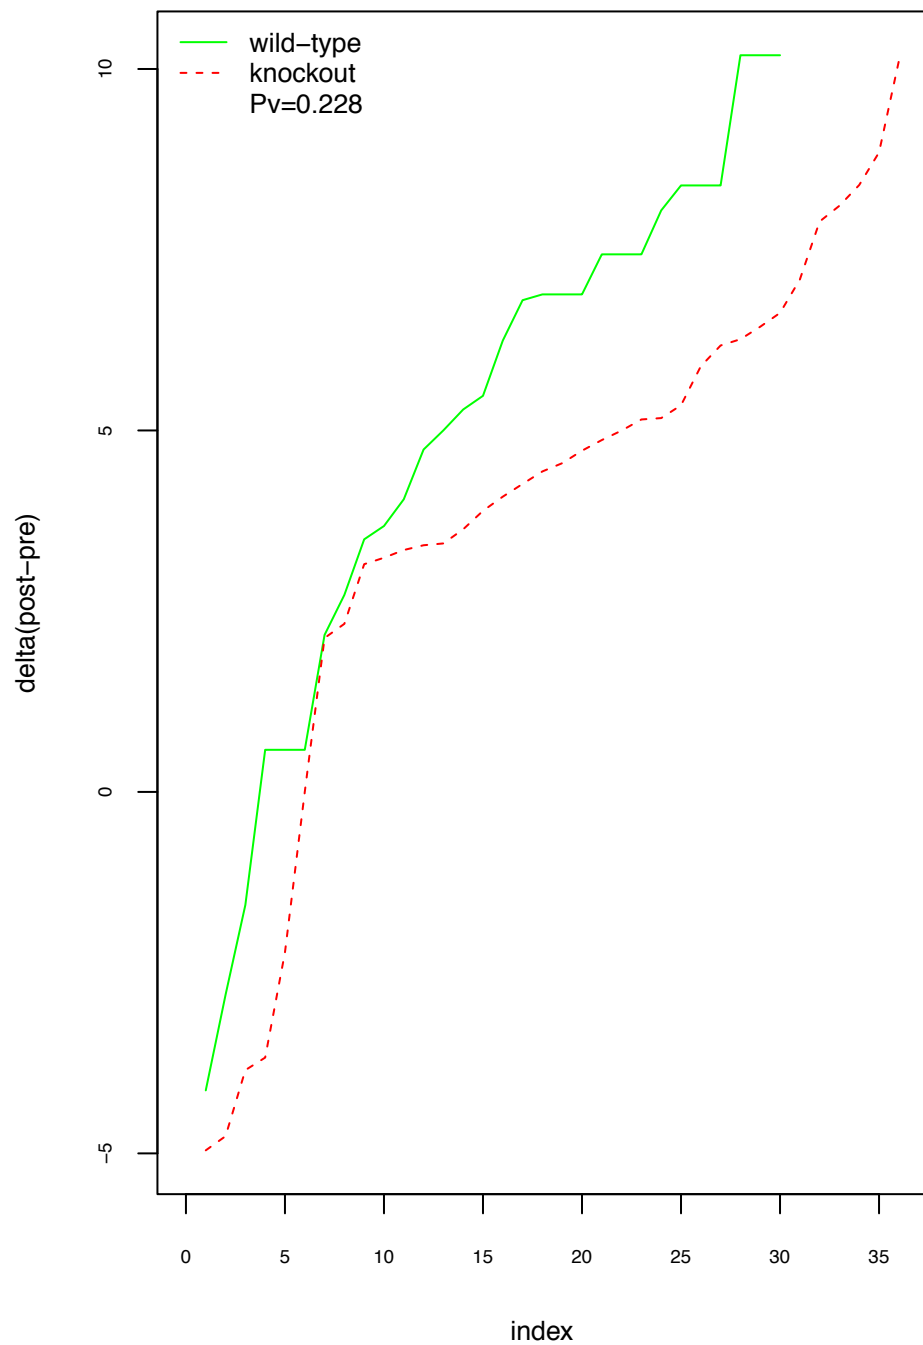

### Pparg

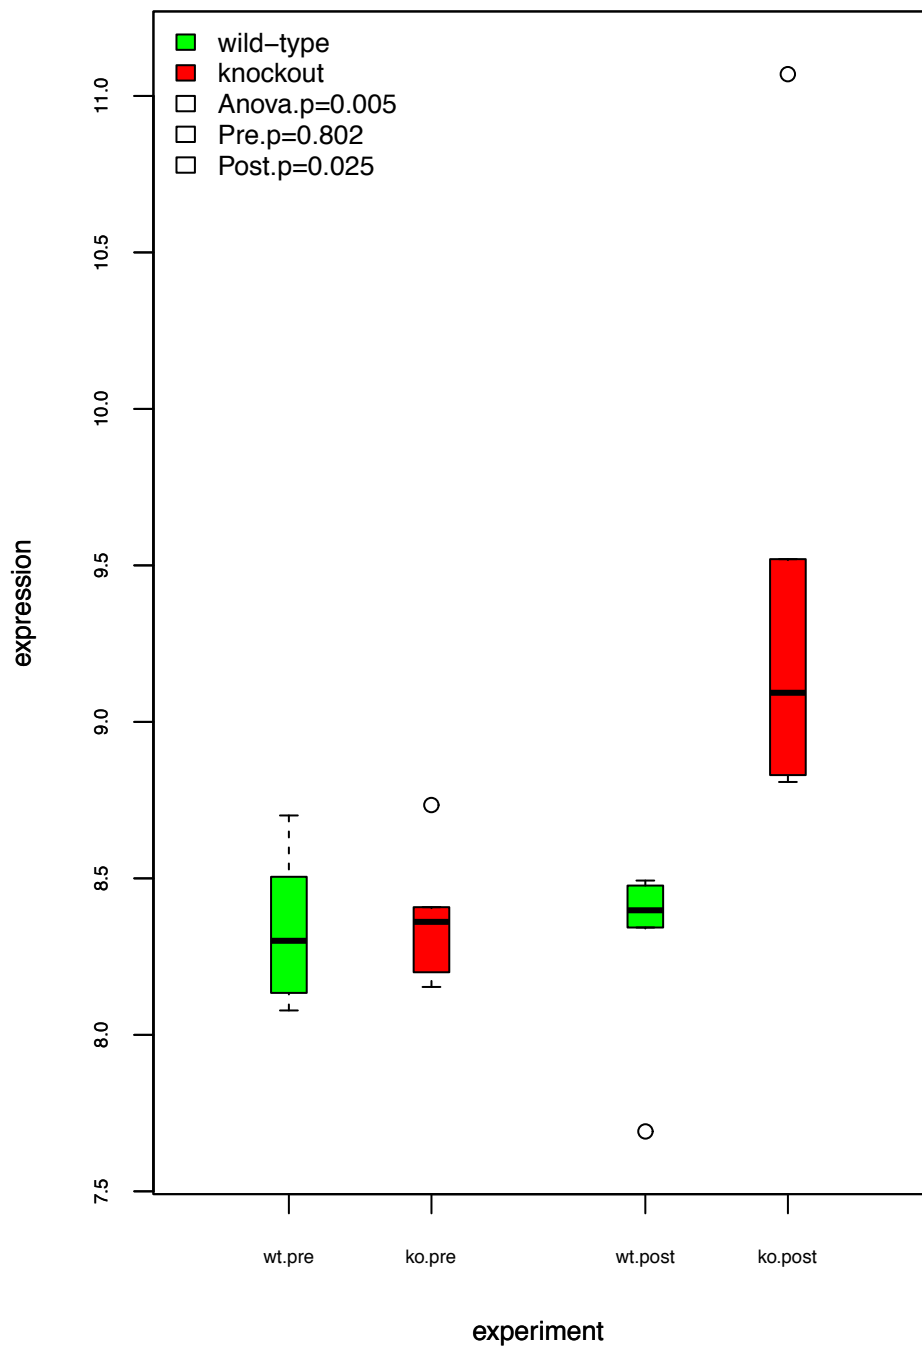

### Pparg

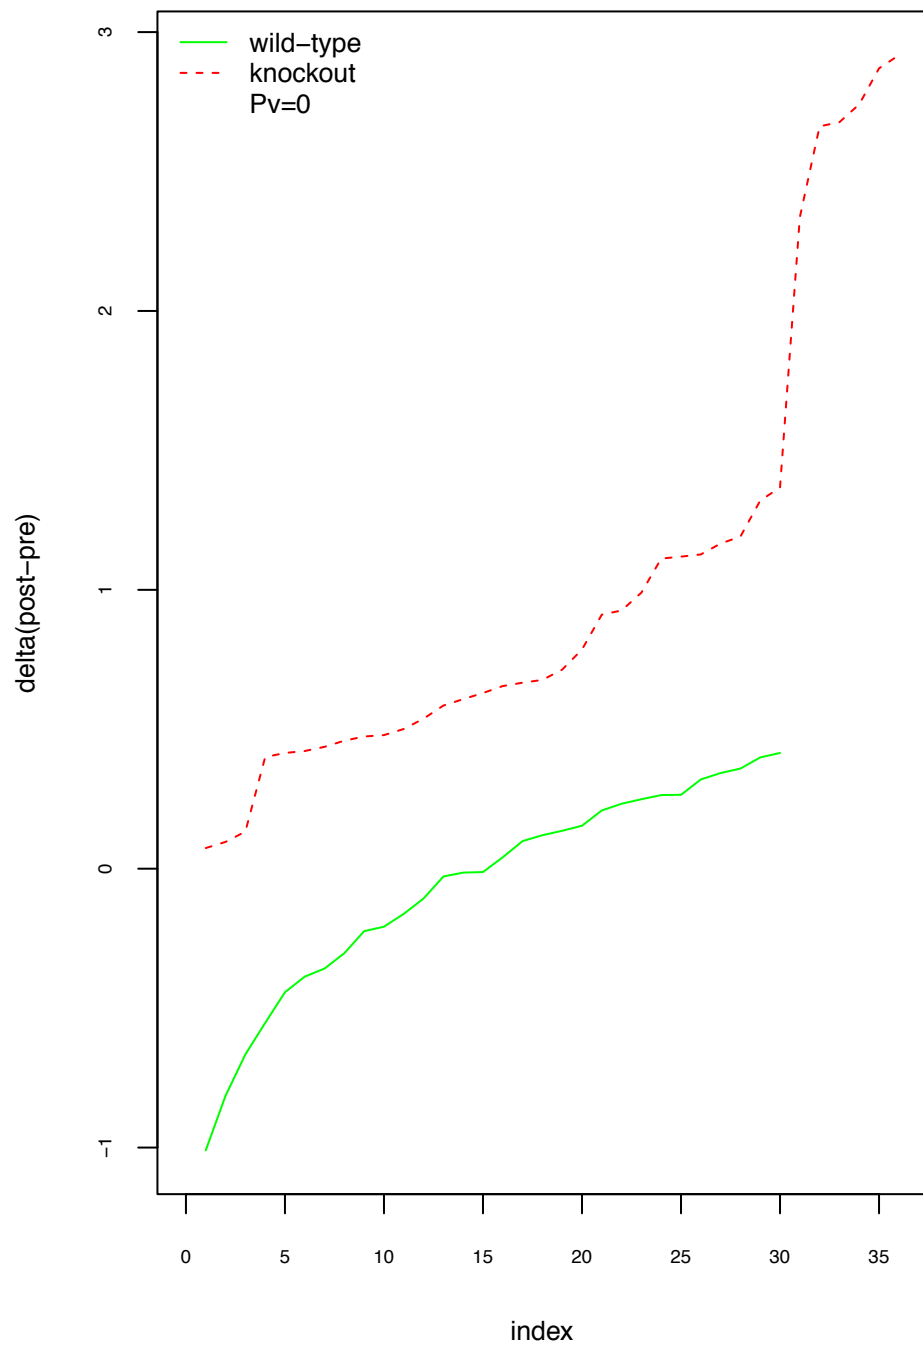

### Pou5f1(Oct4)



### Pou5f1(Oct4)

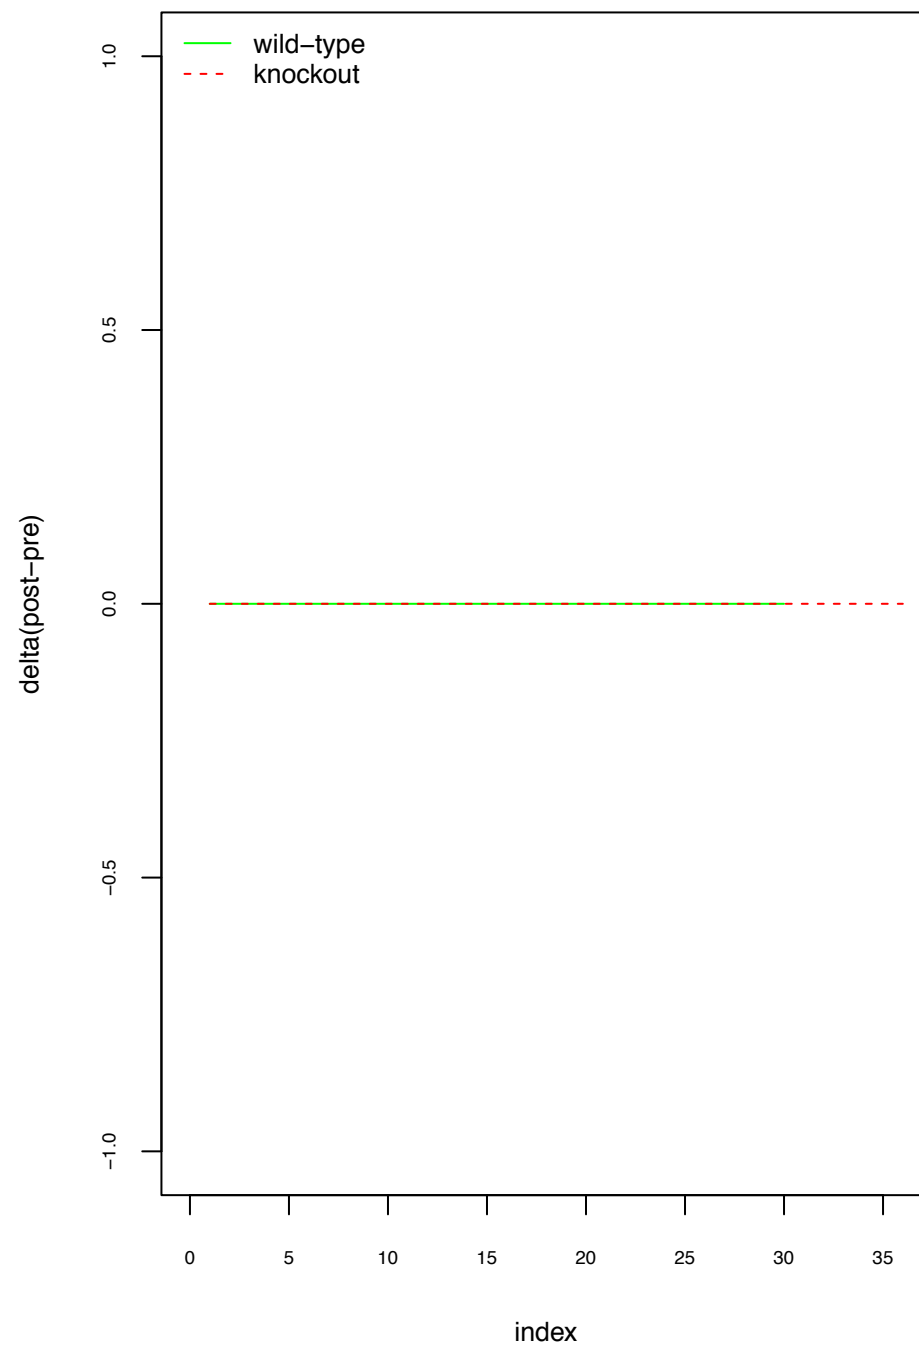

## Postn

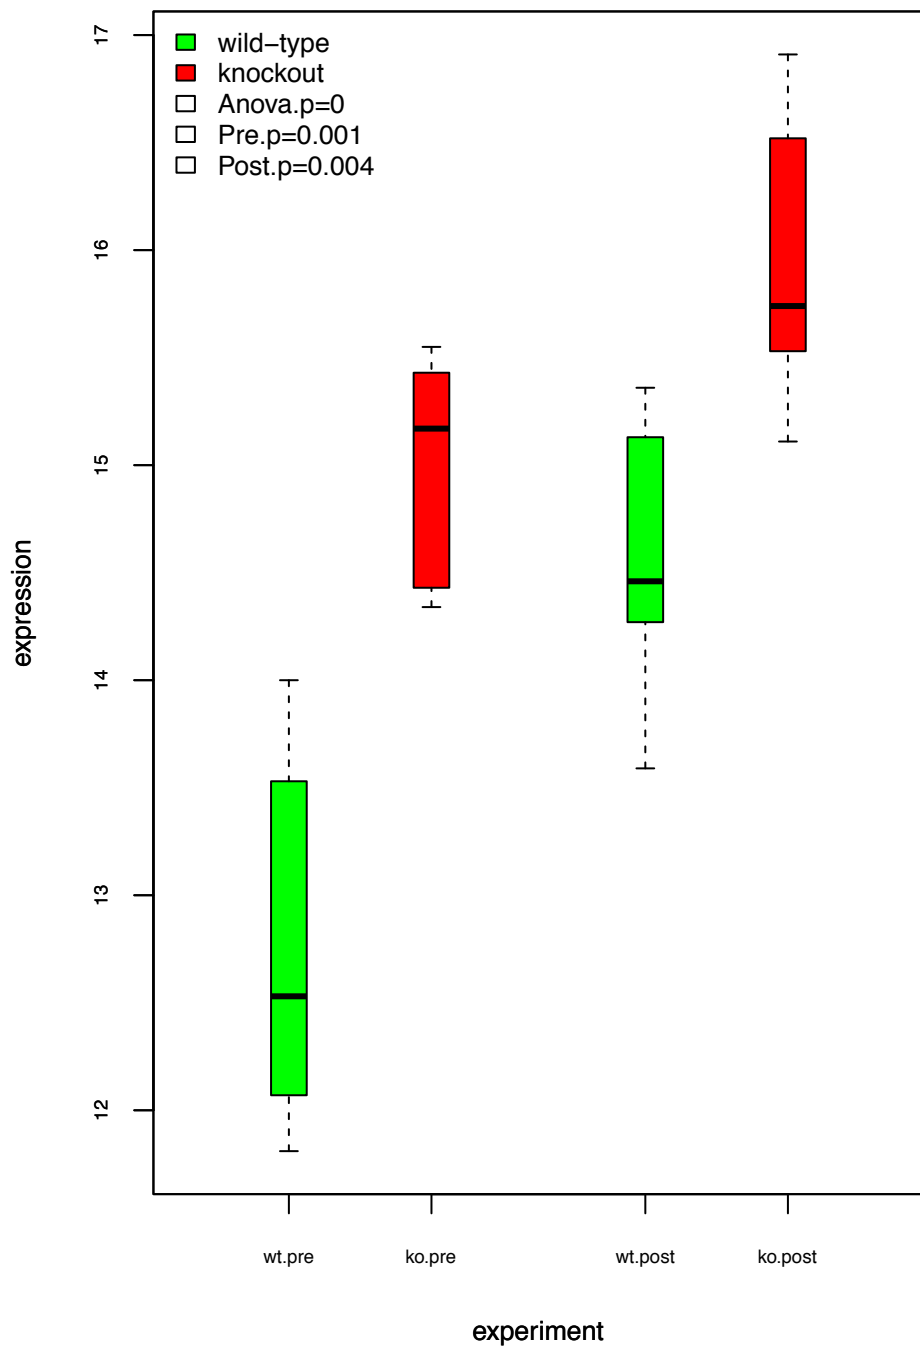

## Postn

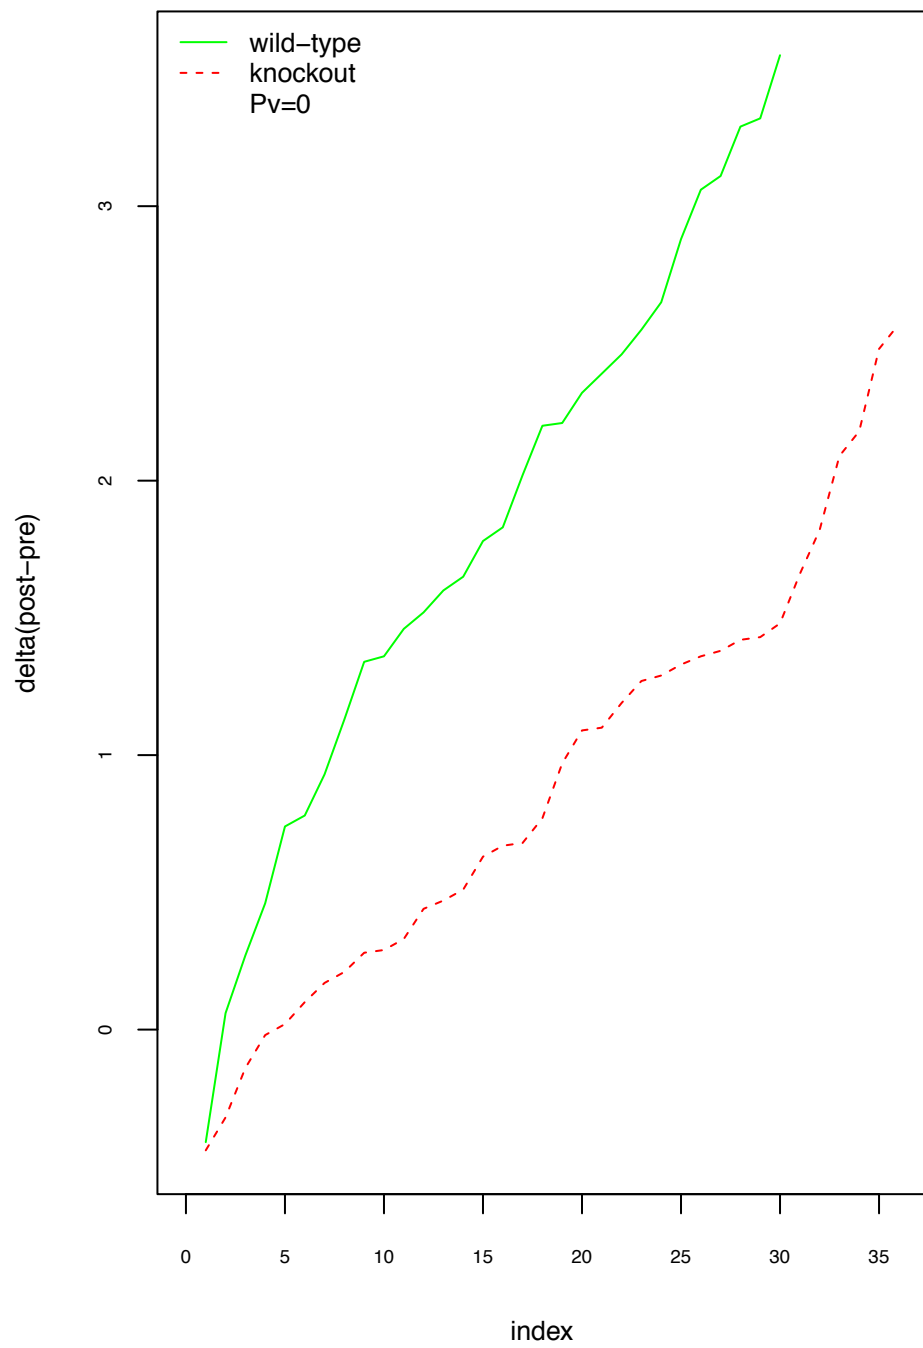

## Runx2

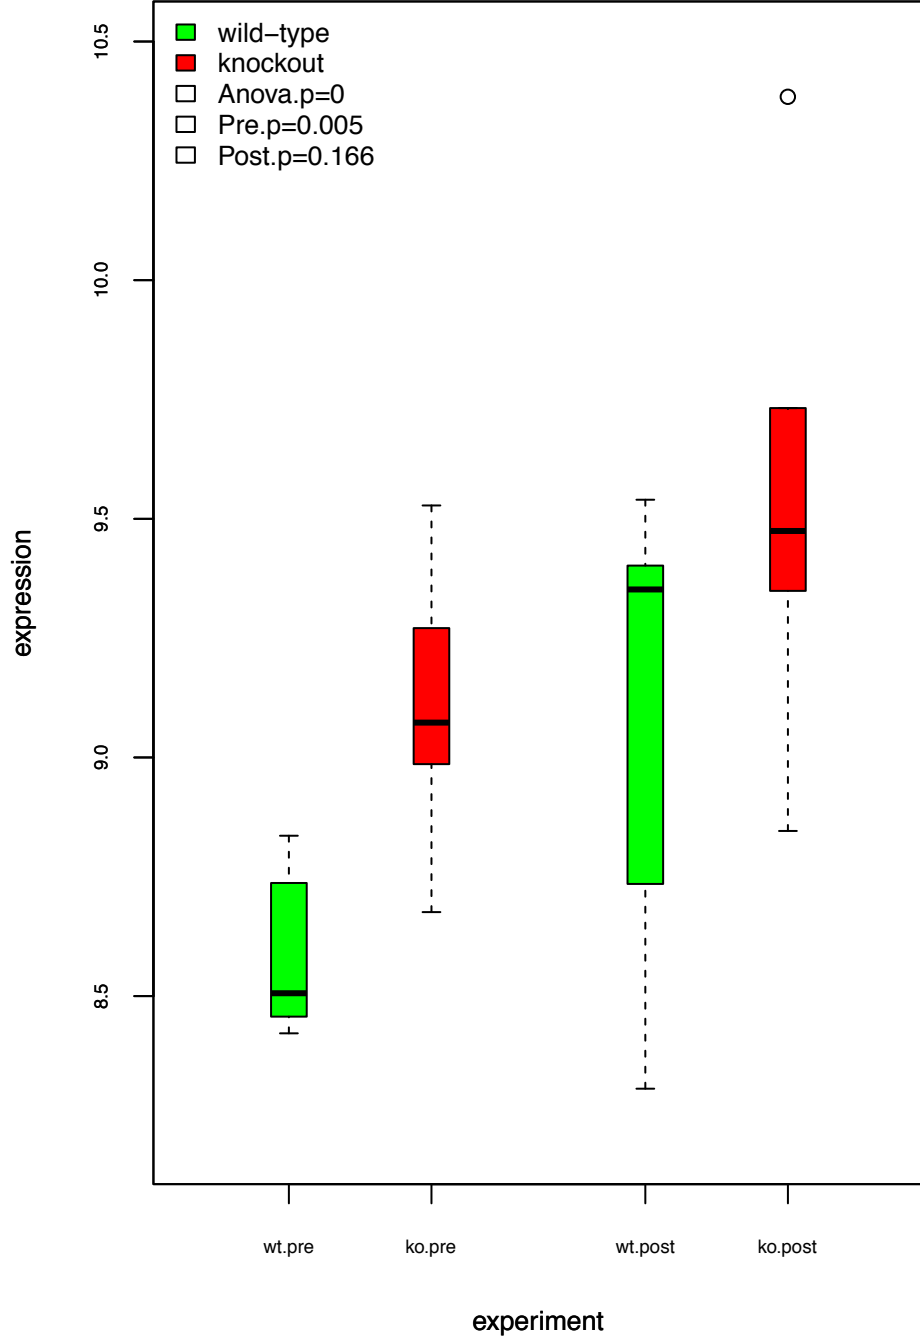

## Runx2

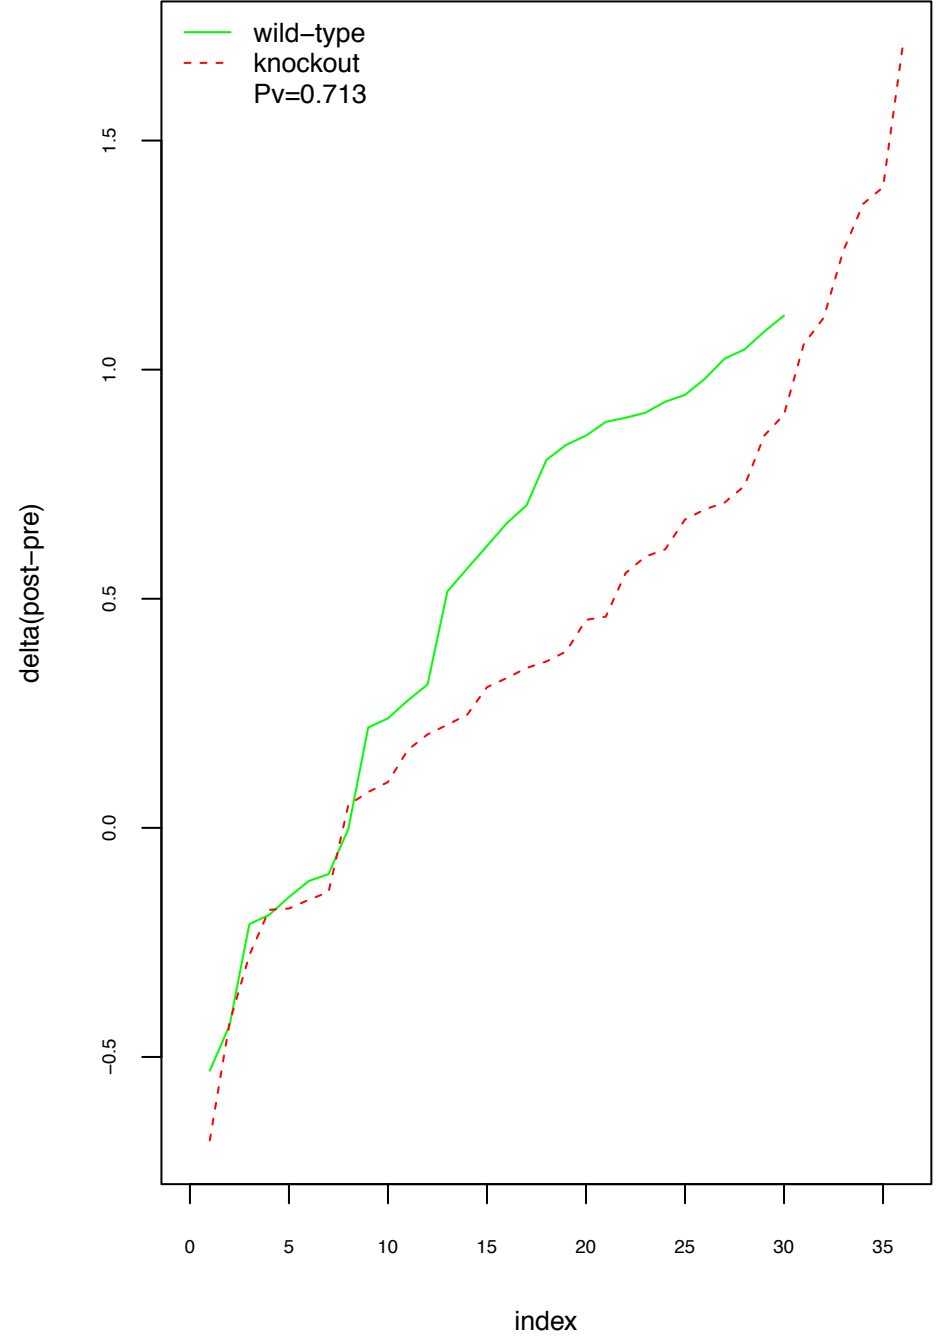



# Rexo1

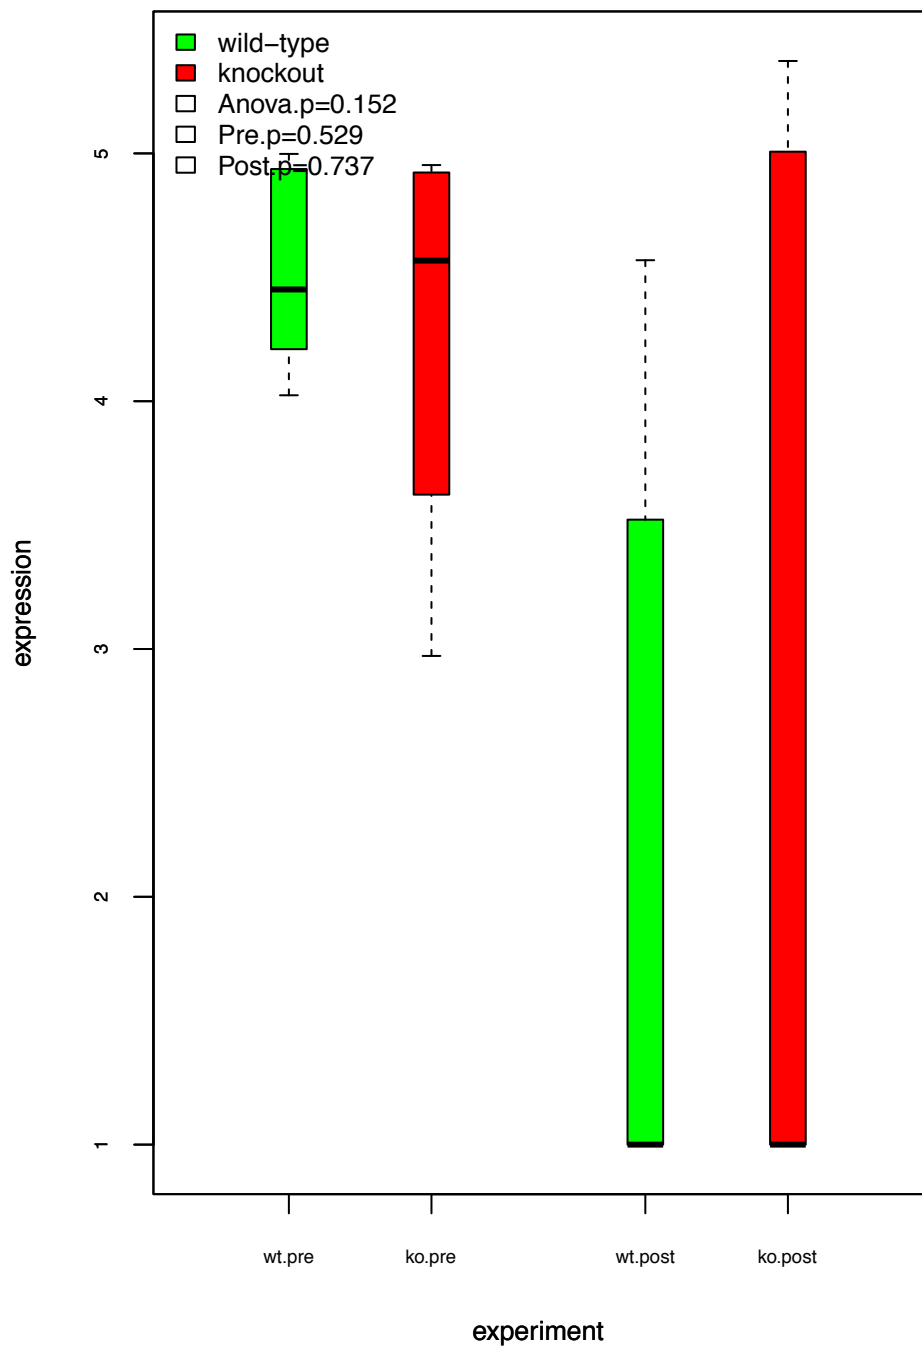

# Rexo1

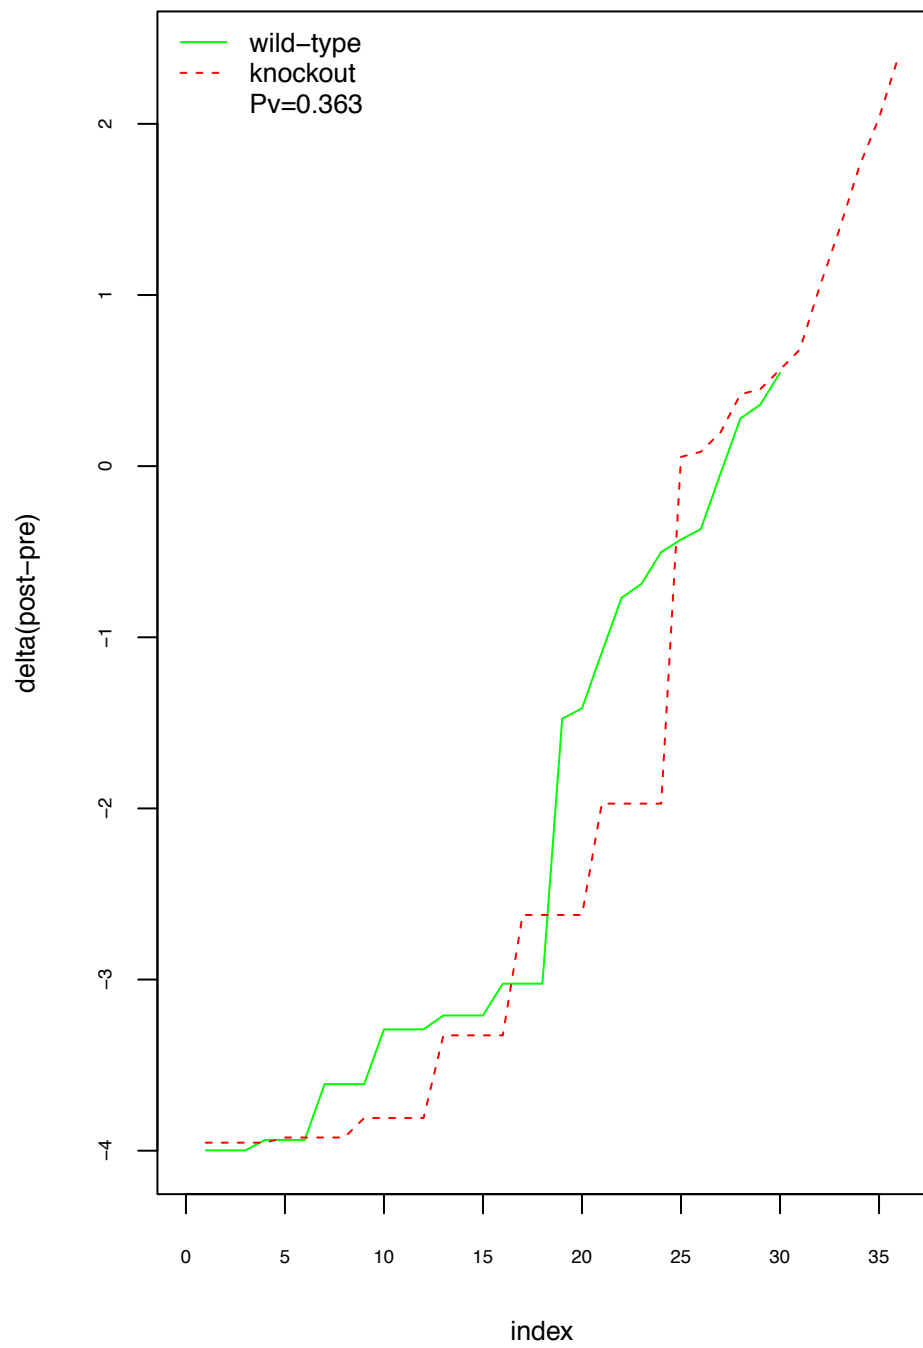

# RANKL

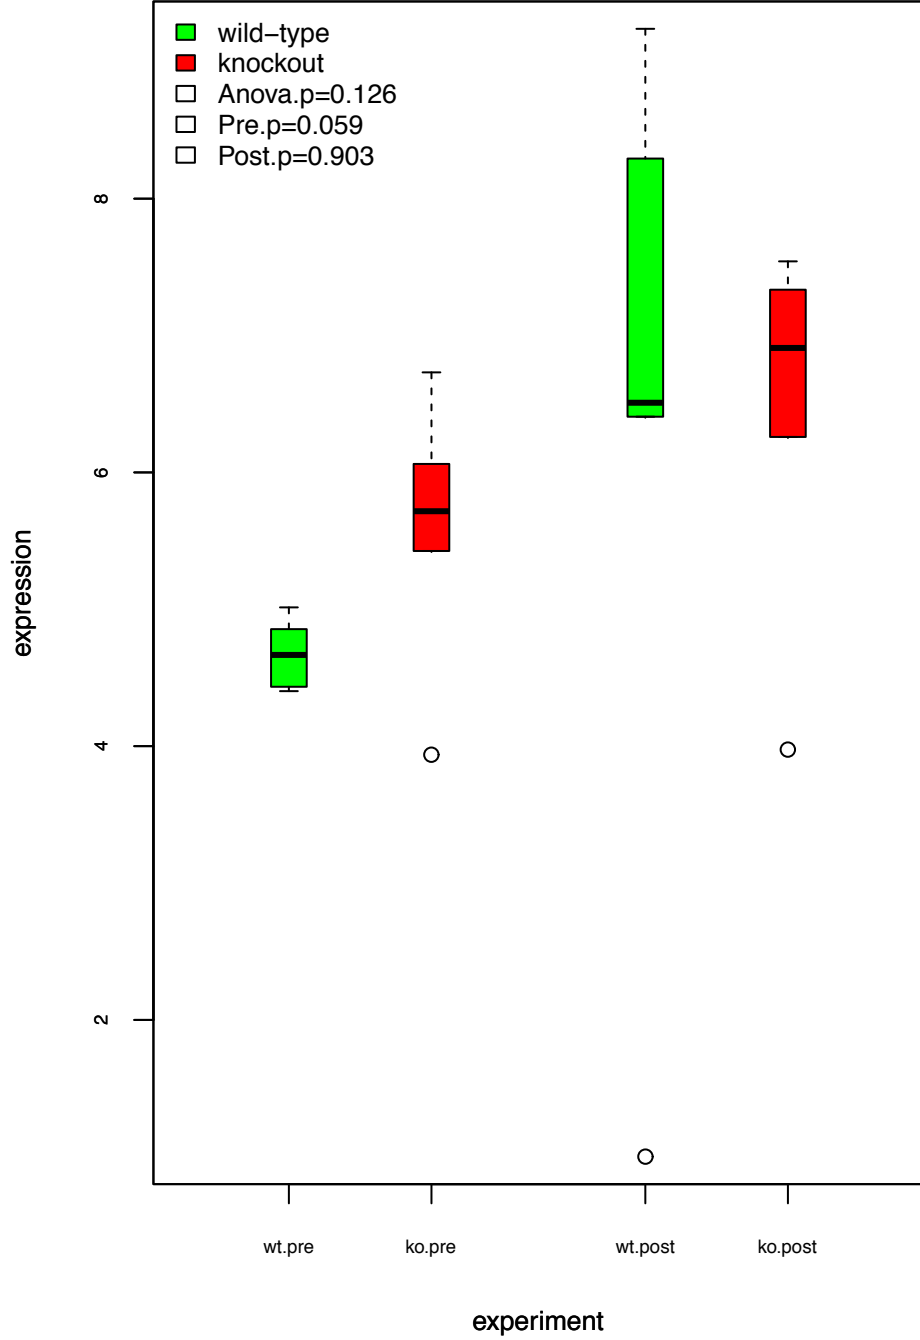

# RANKL

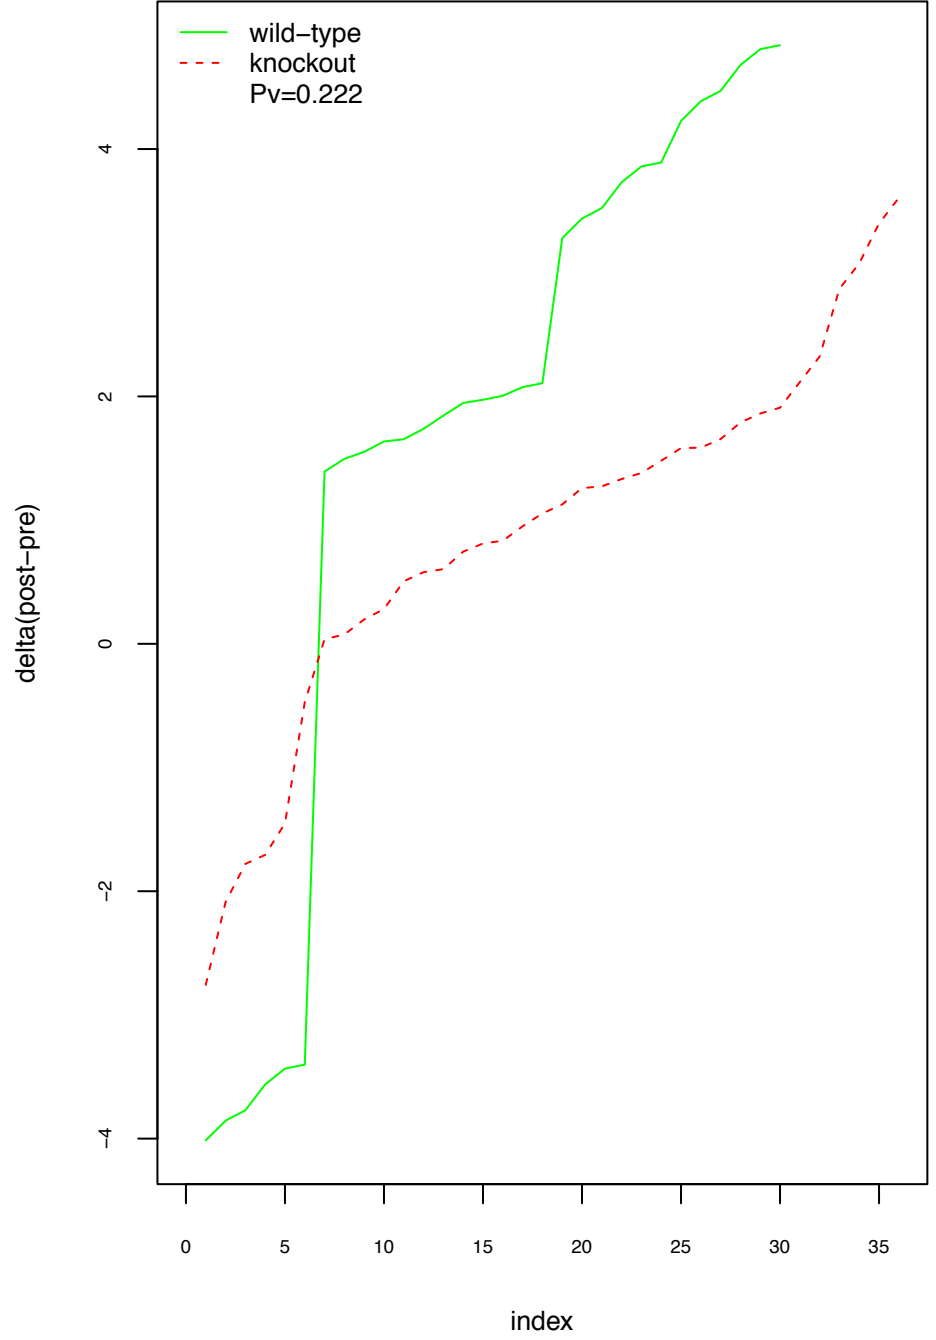

# Spp1

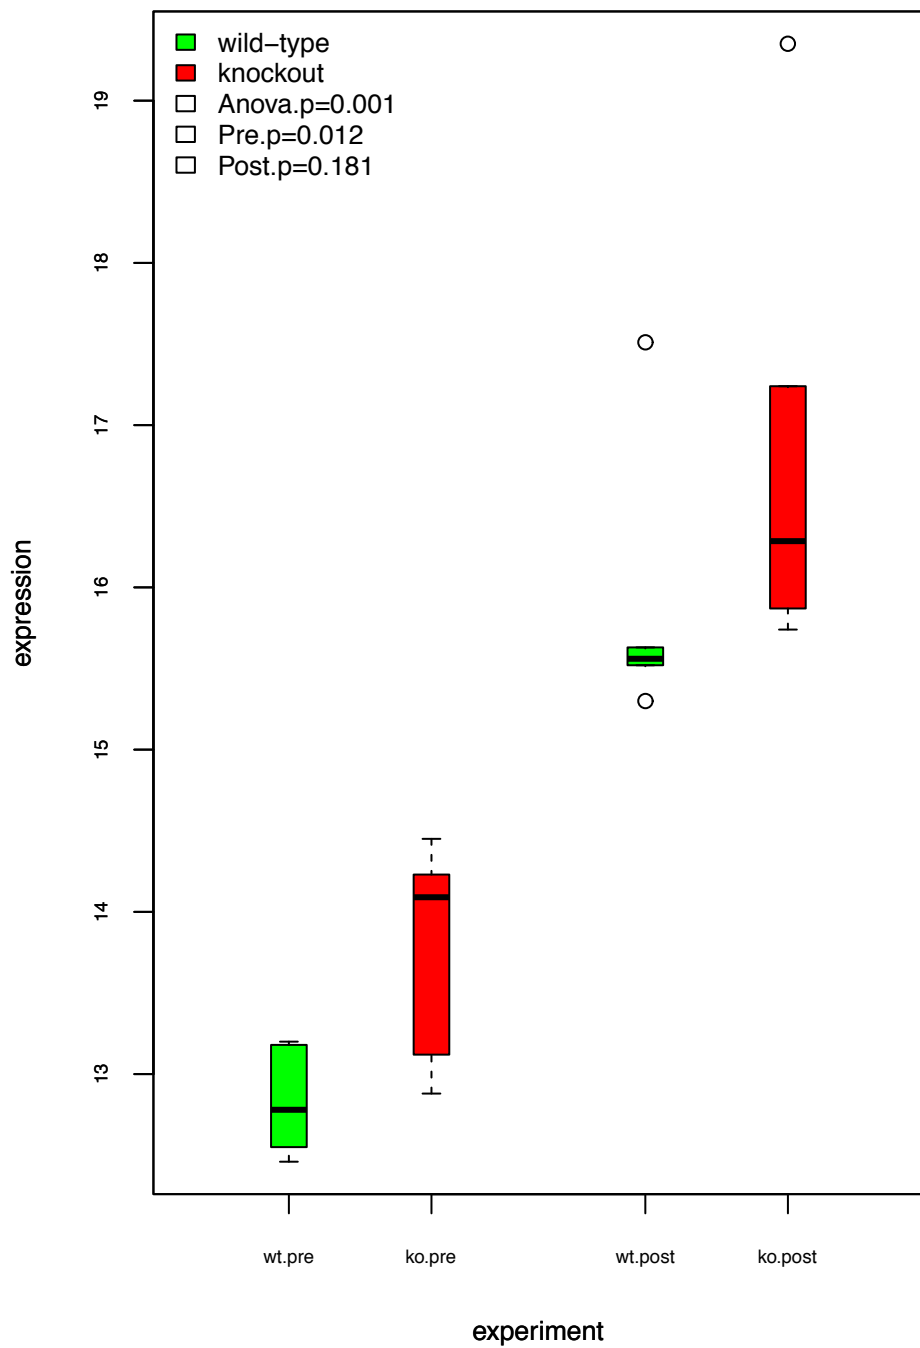

# Spp1

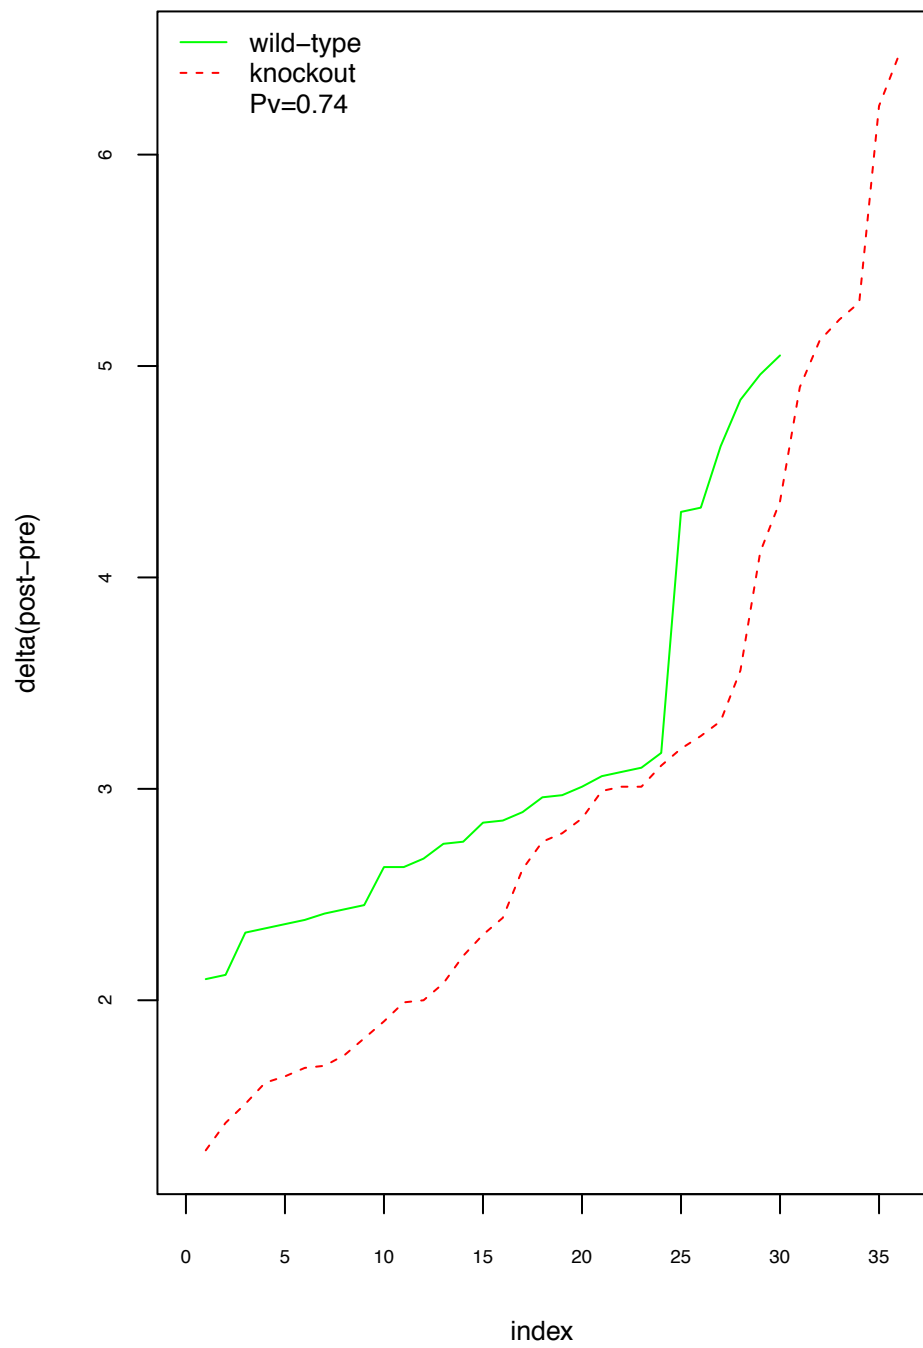

# Sparc

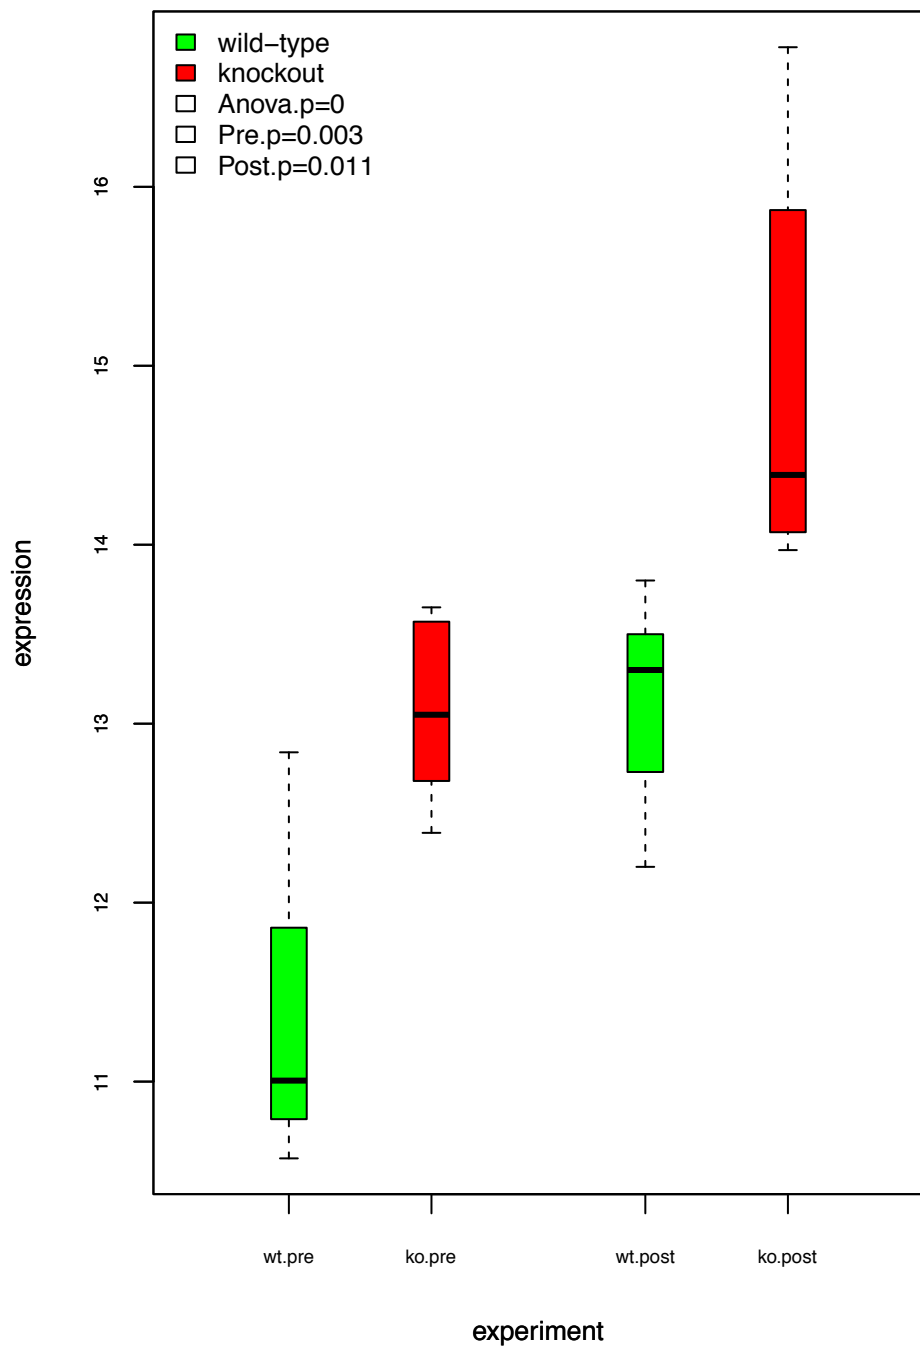

# Sparc

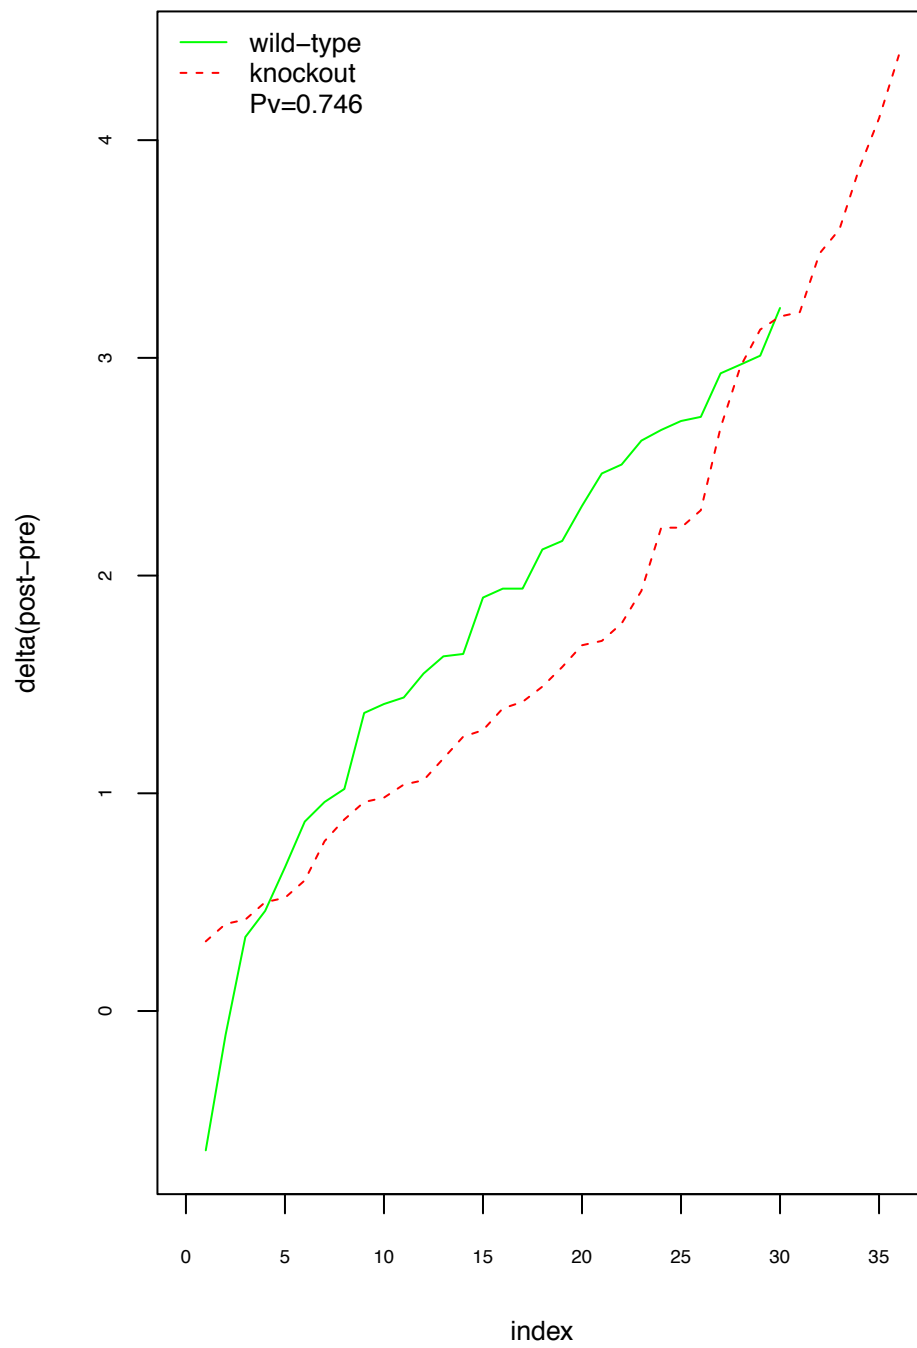

### Sox9

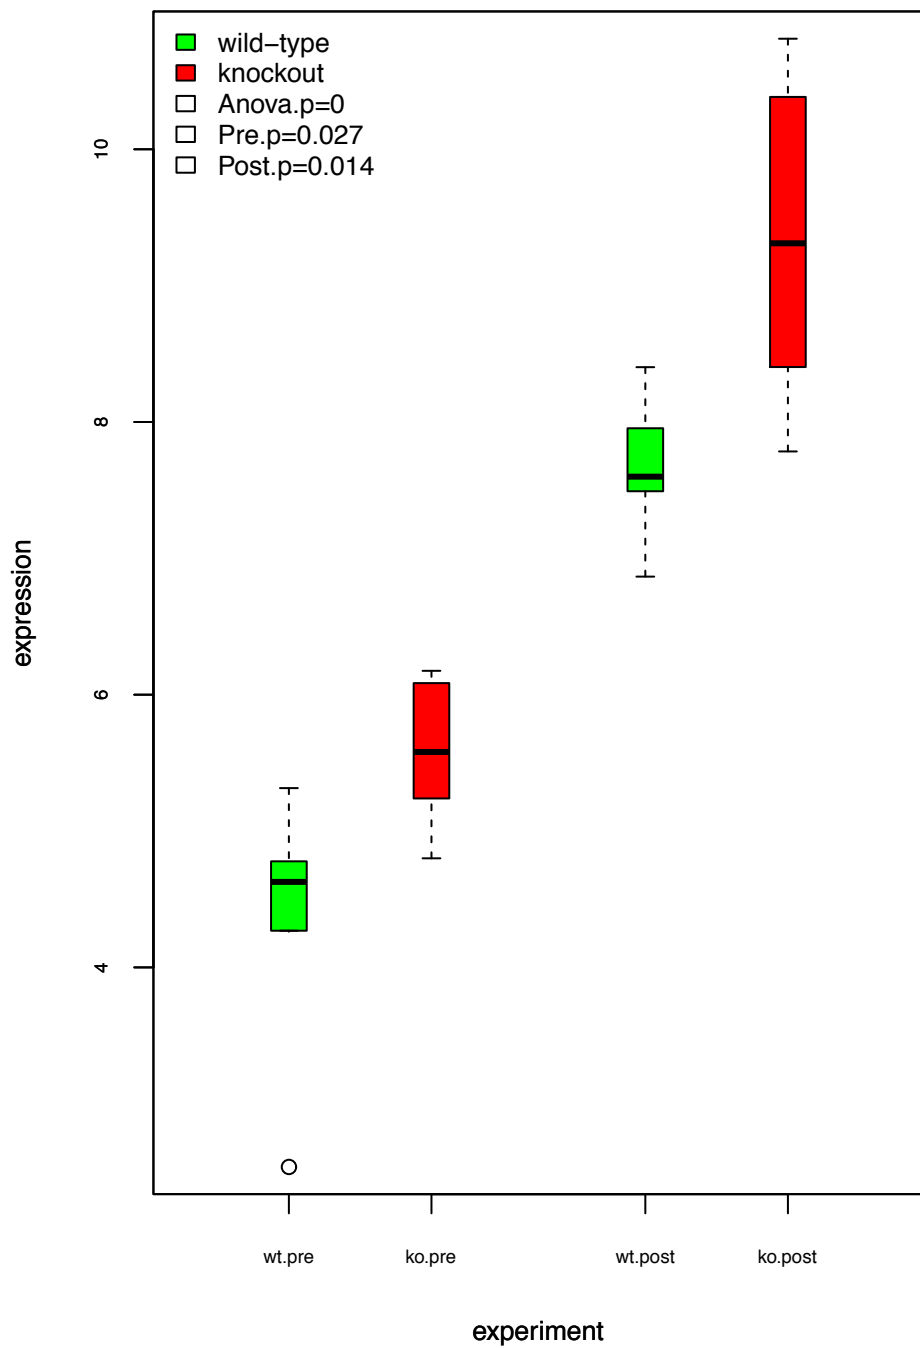

### Sox9

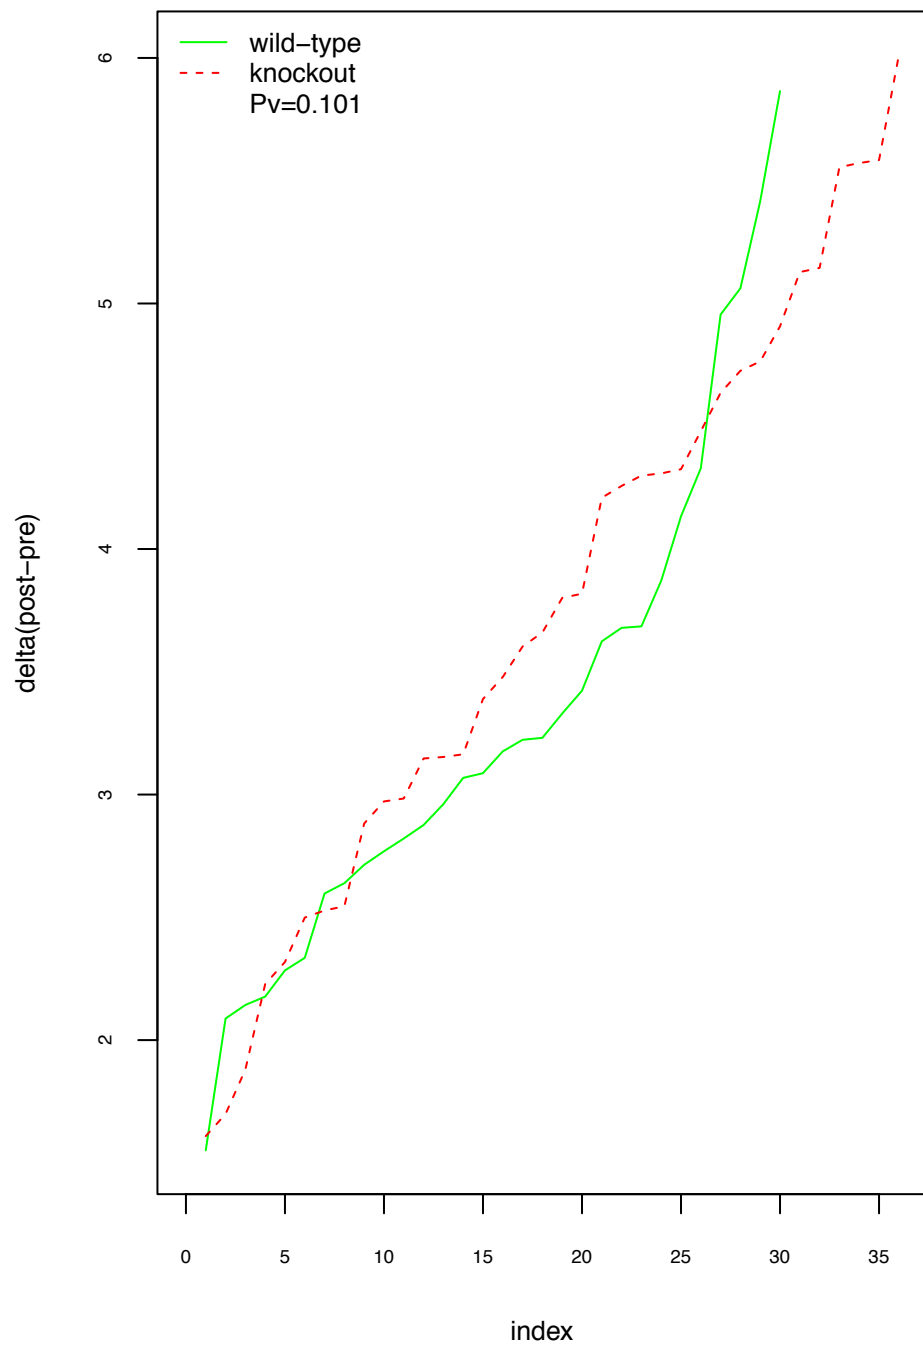

## Sost

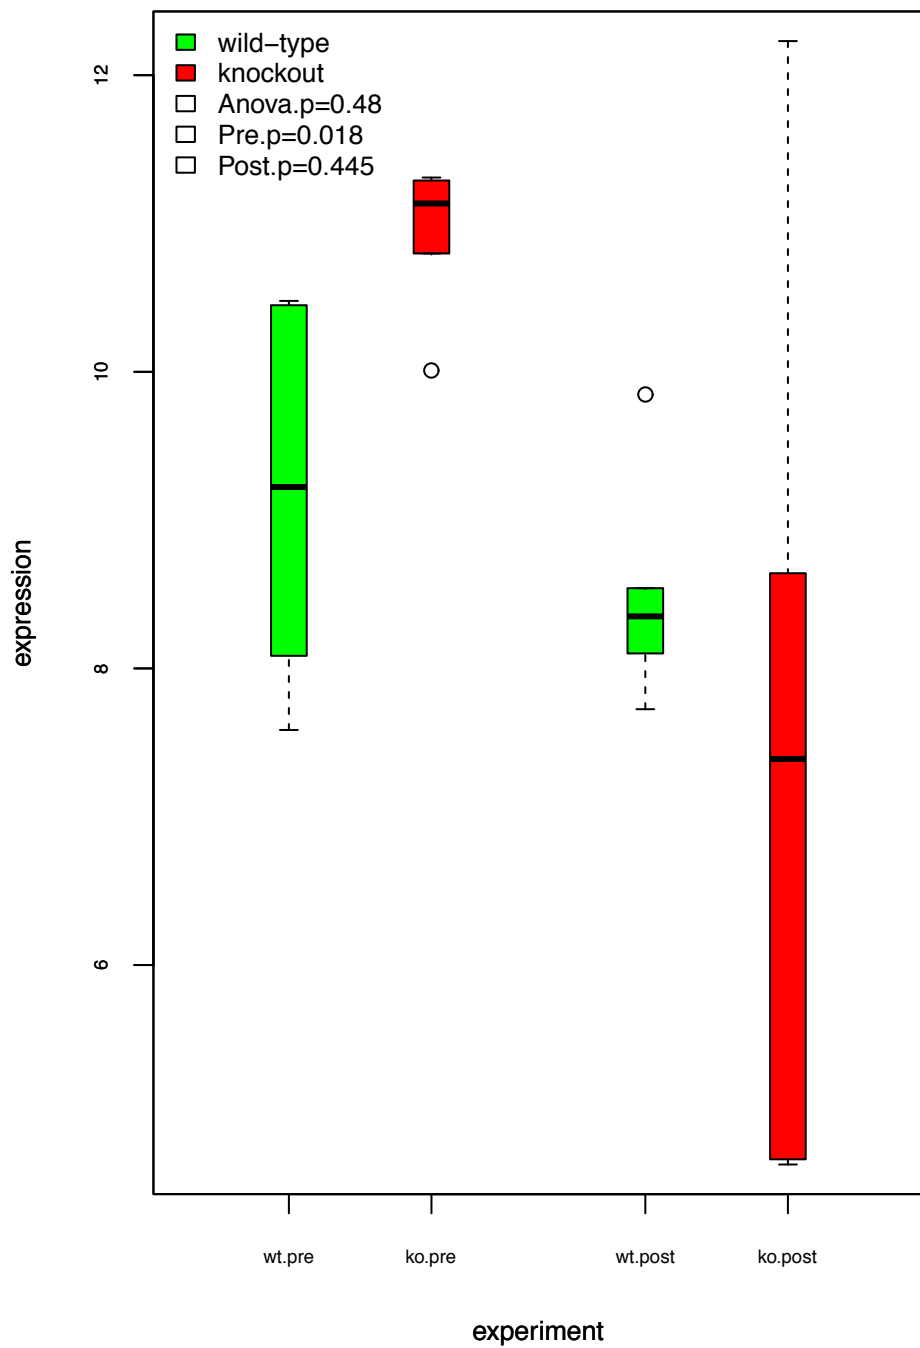

## Sost

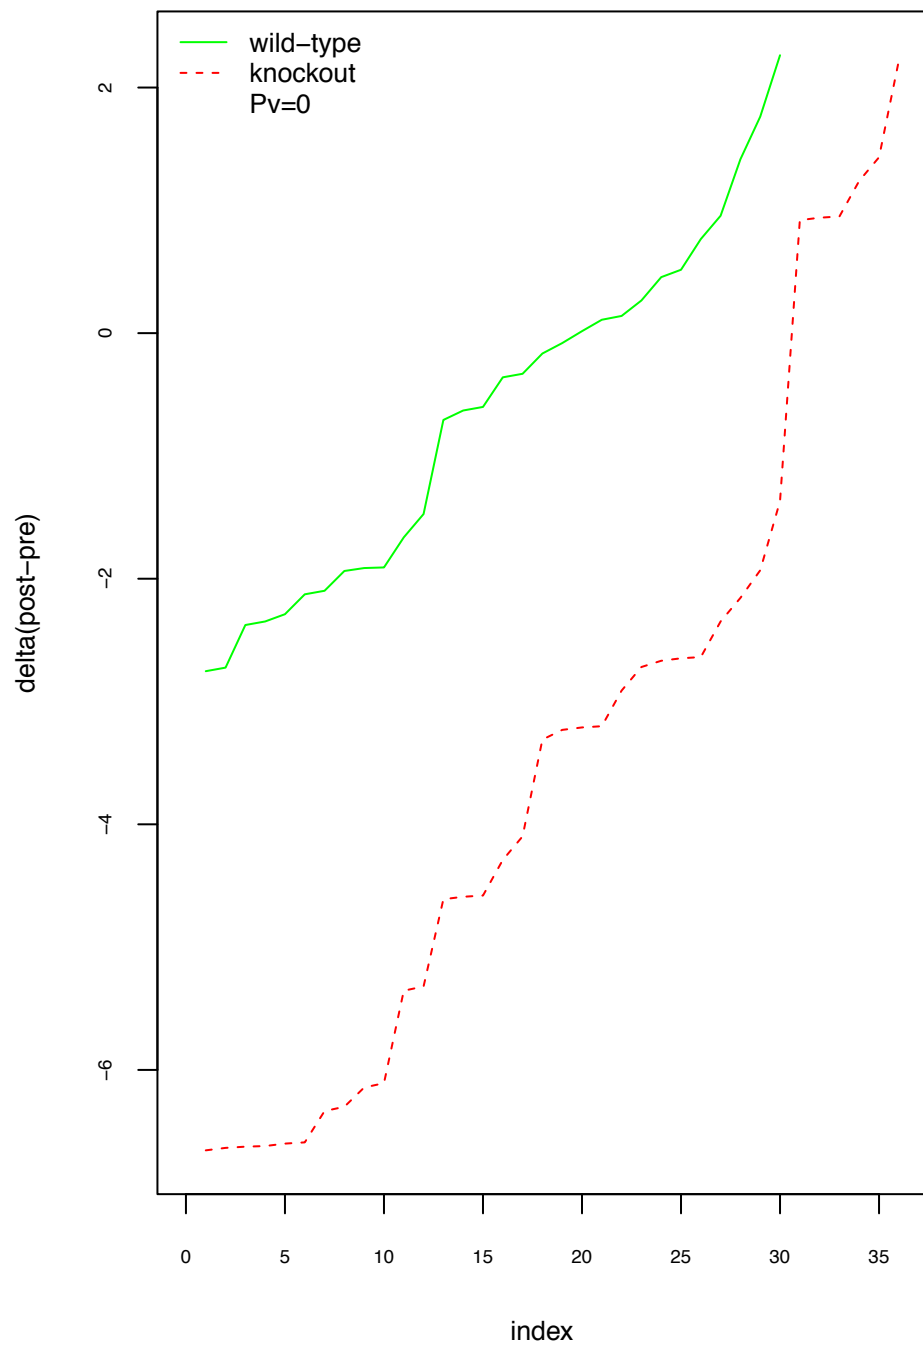

### Smo

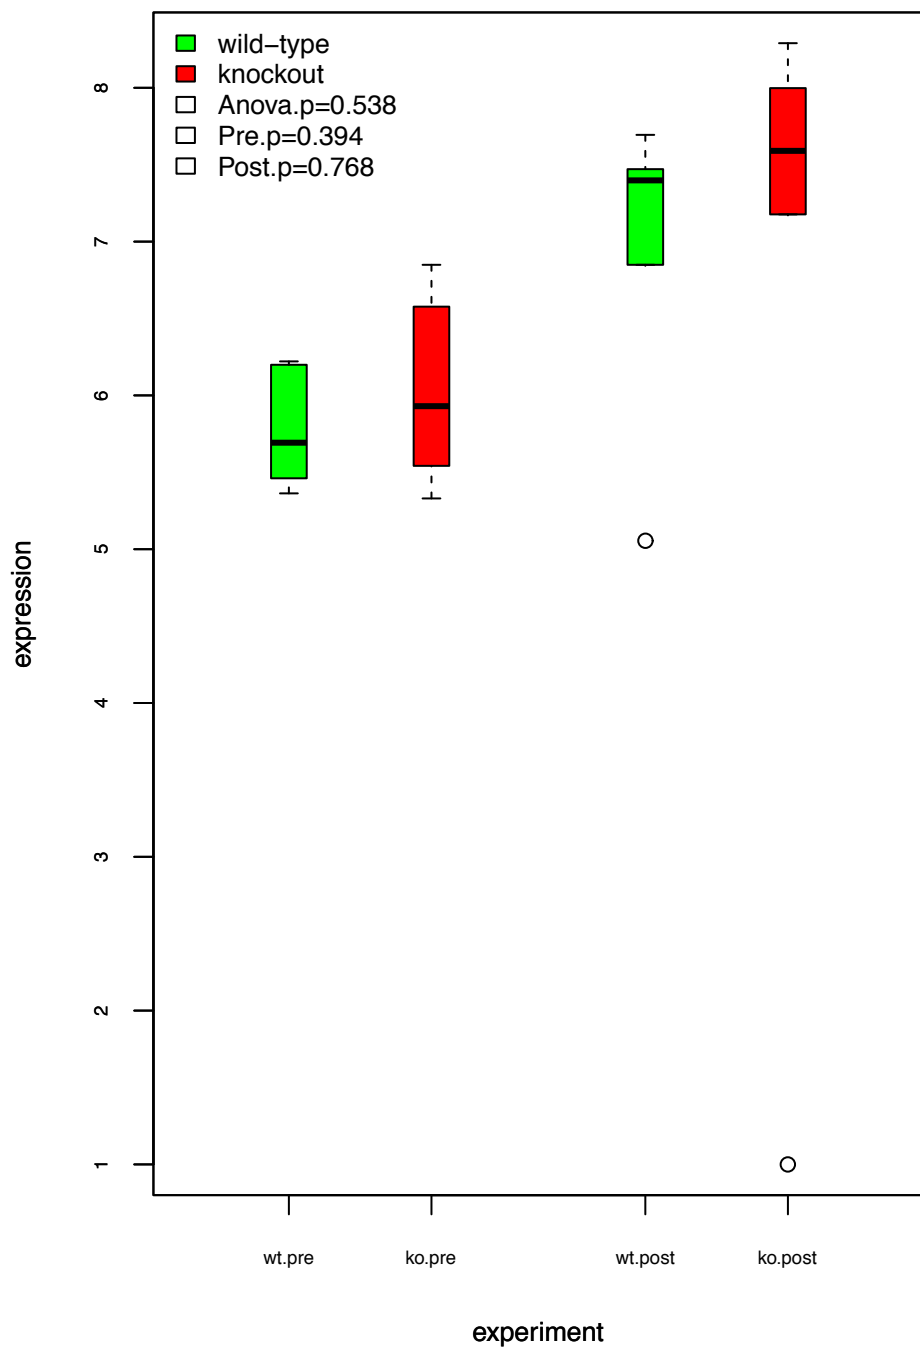

### Smo

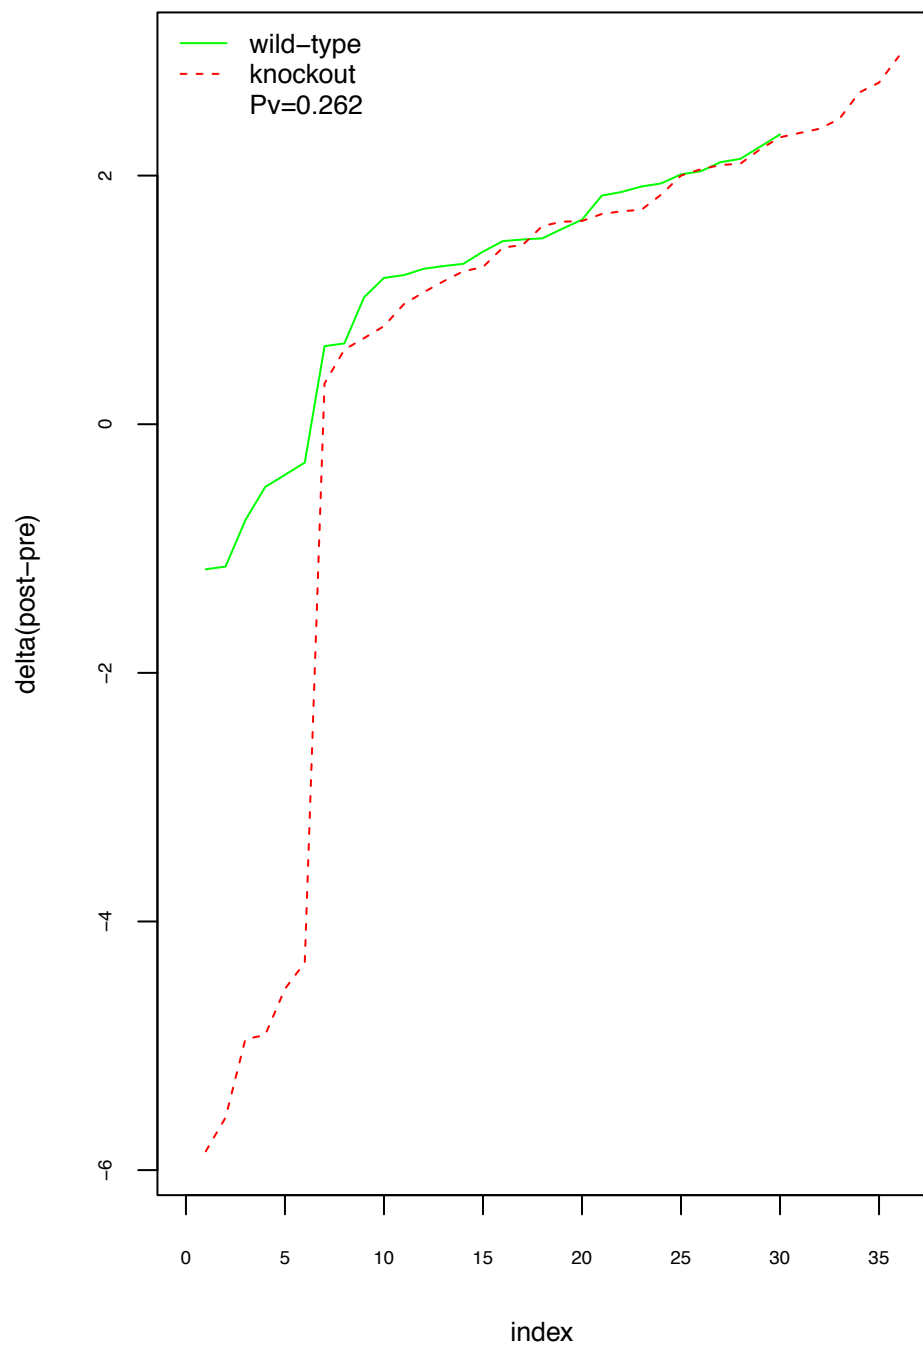

### Smad8

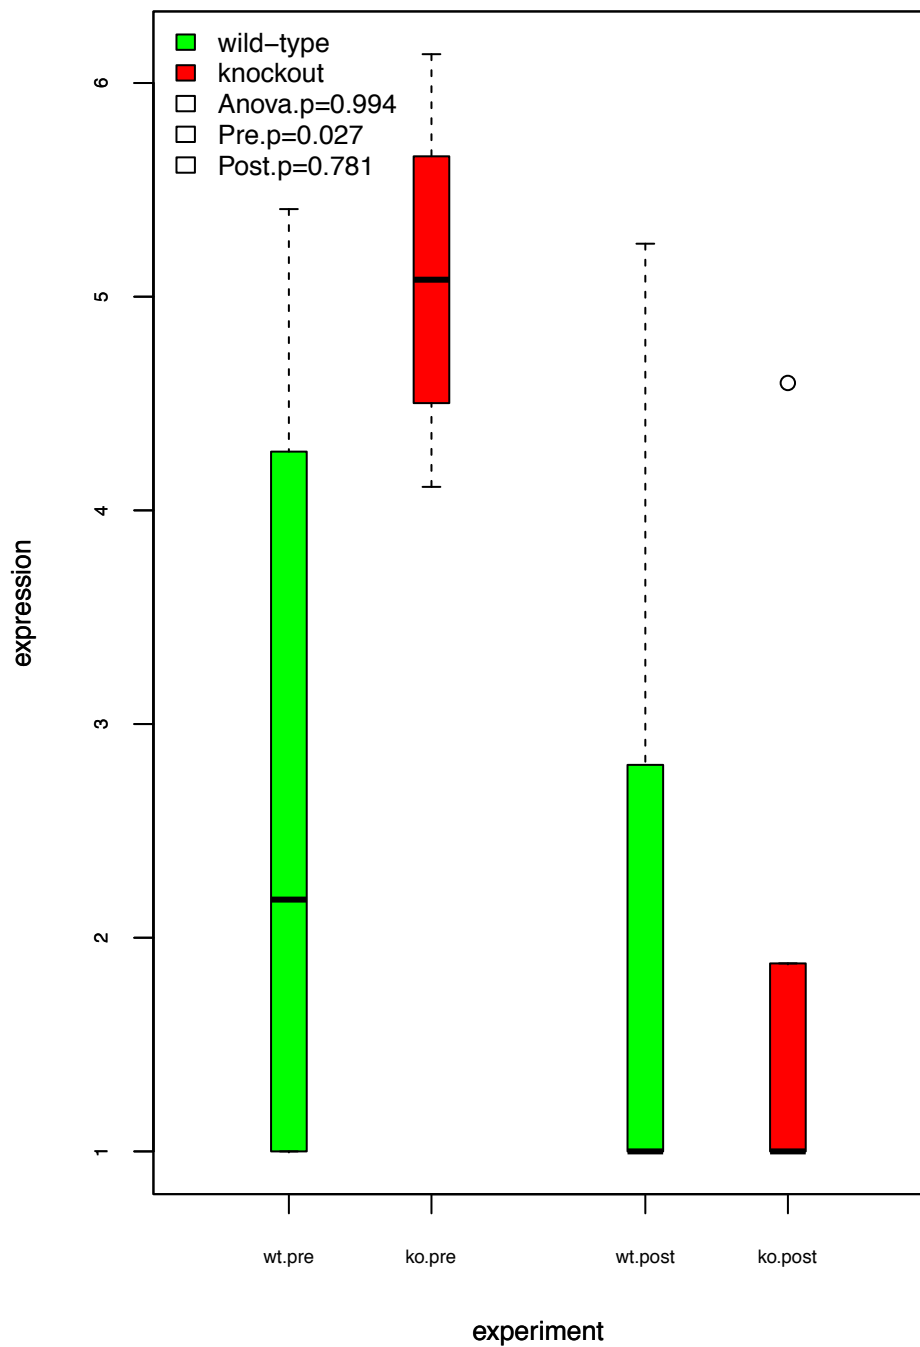

### Smad8

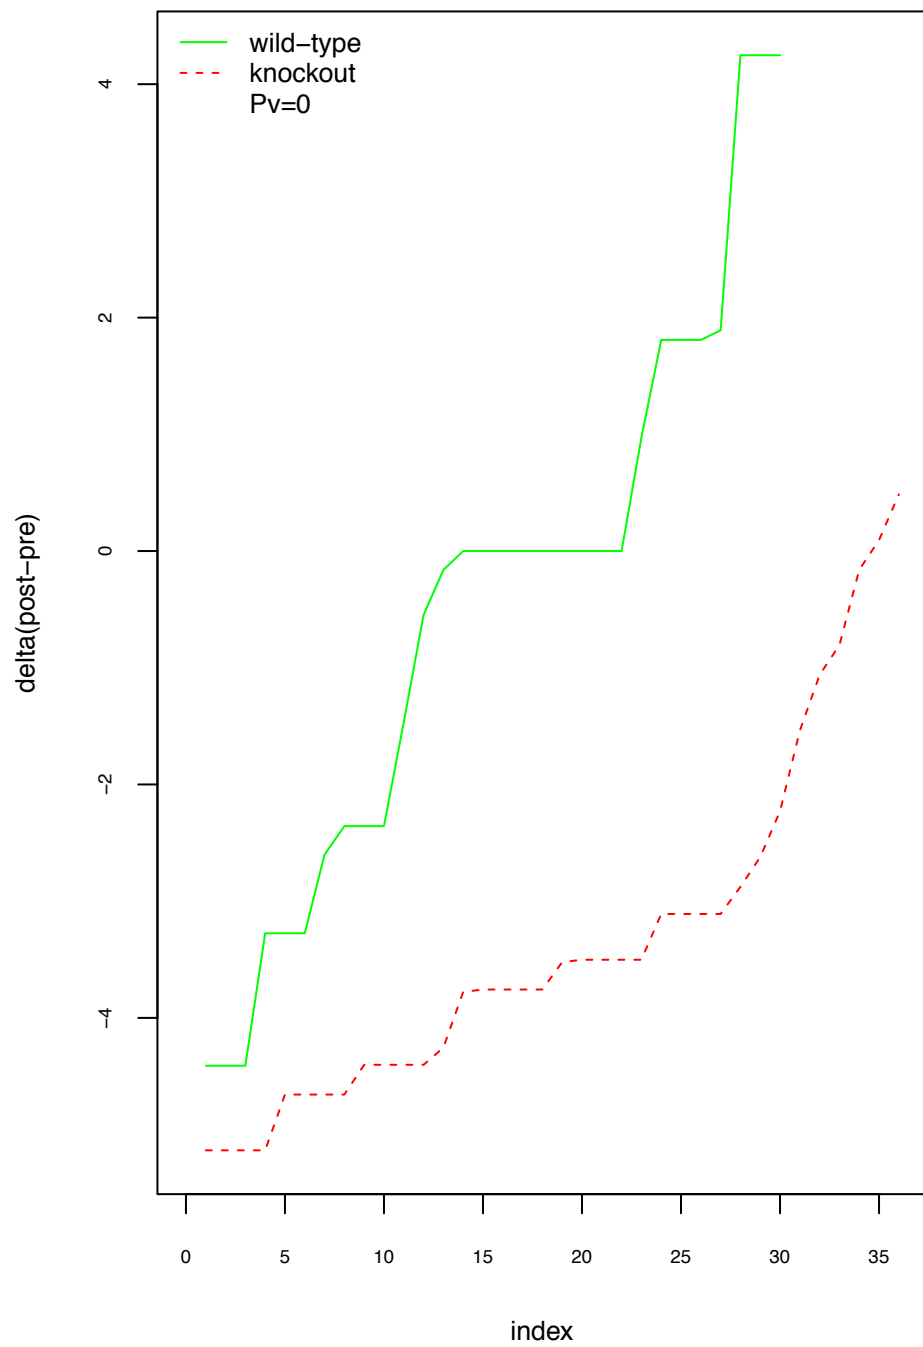



## Smad7

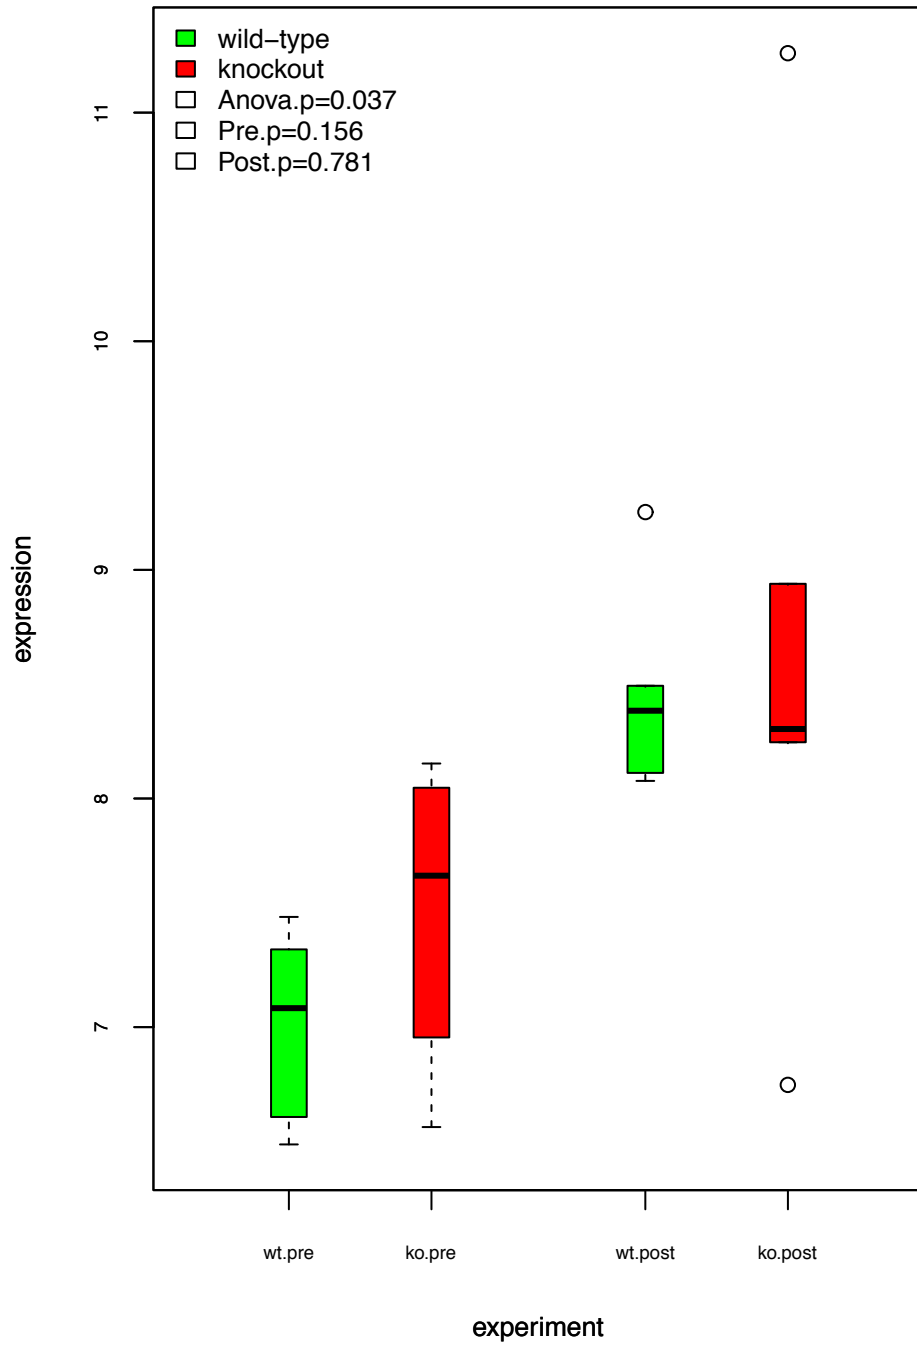

## Smad7

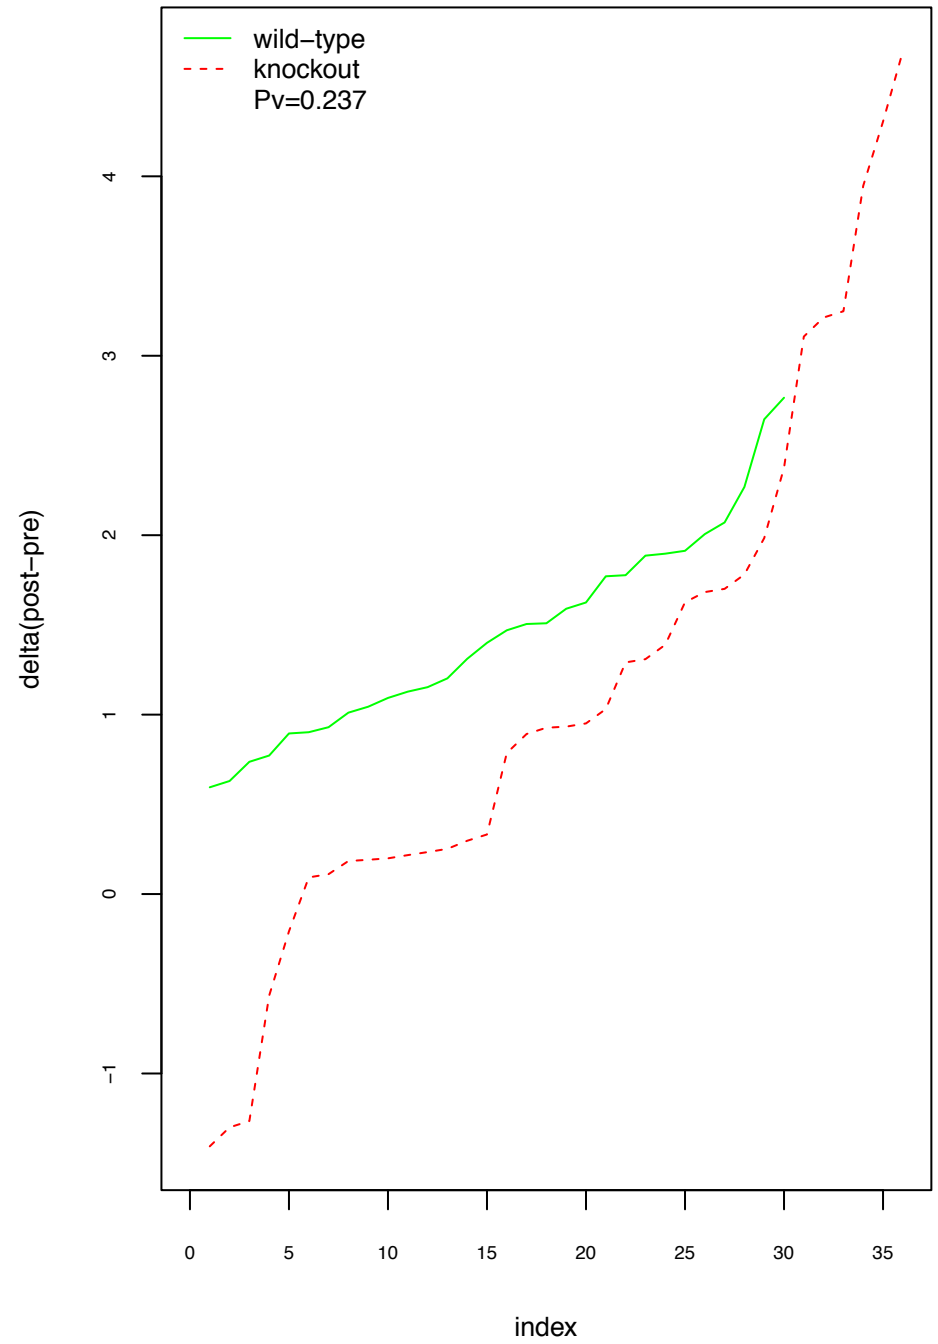

### Smad6

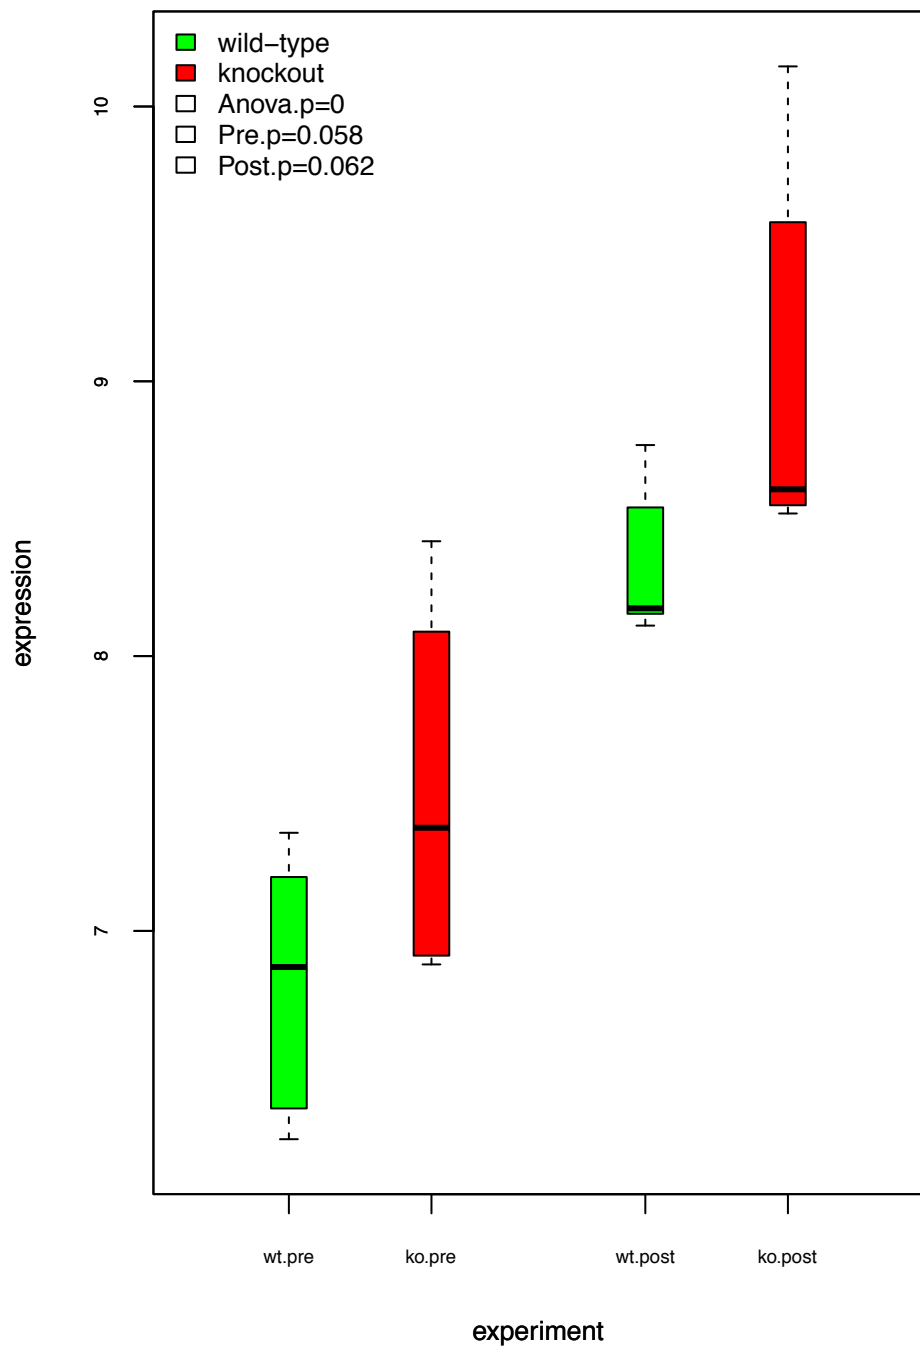

### Smad6

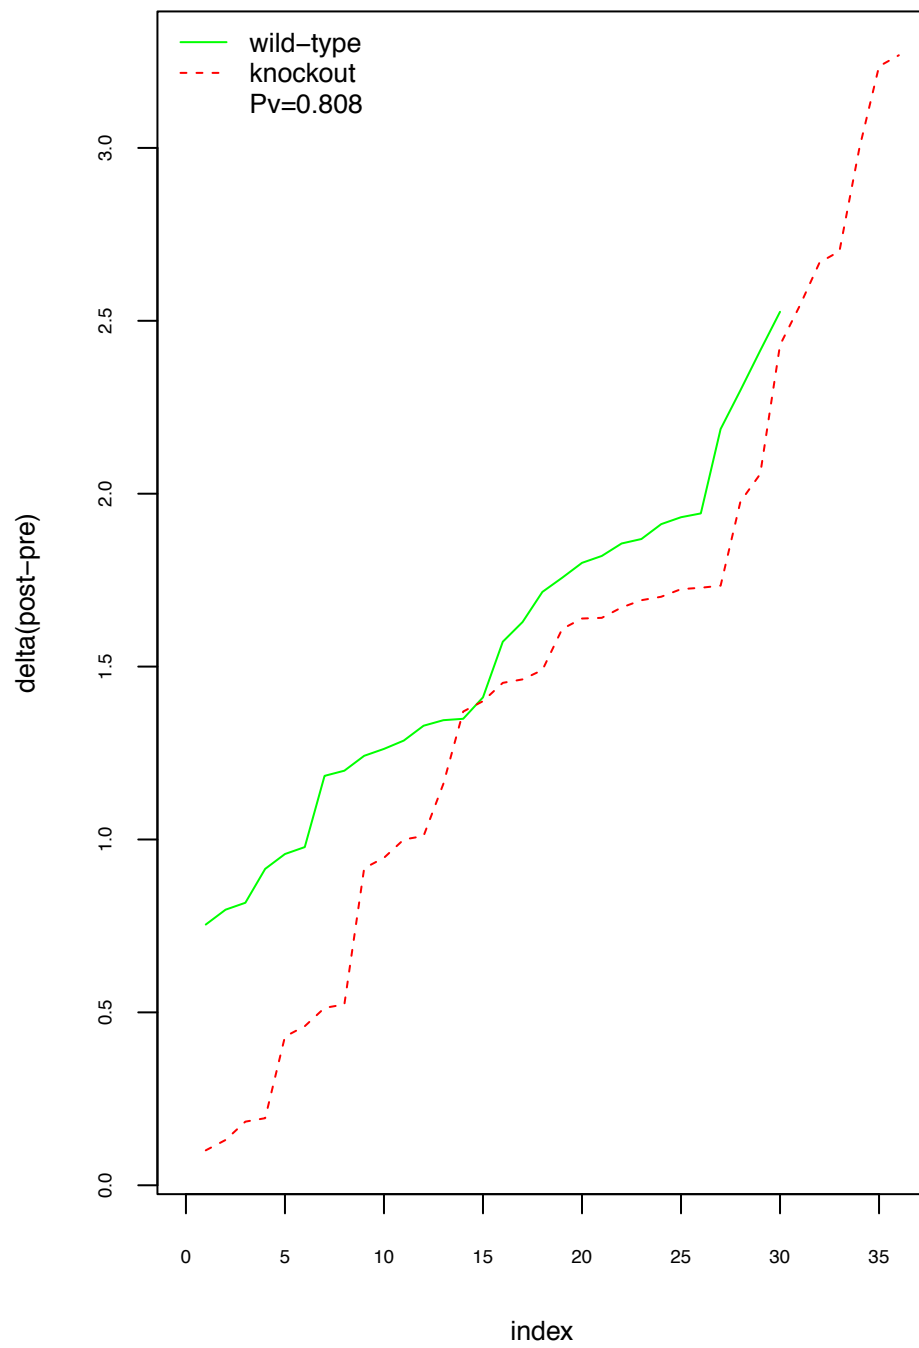

# Smad5

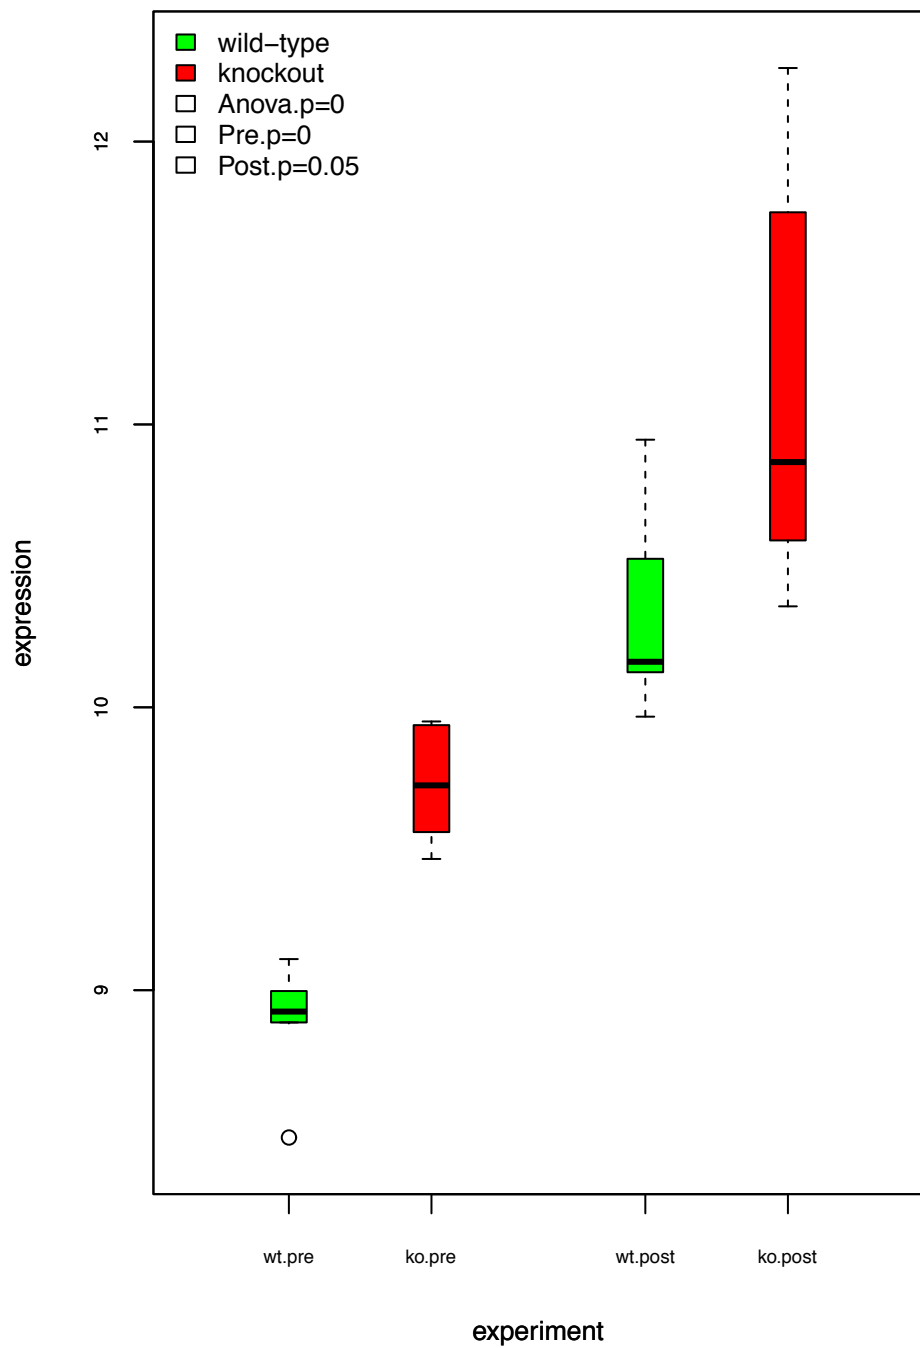

# Smad5

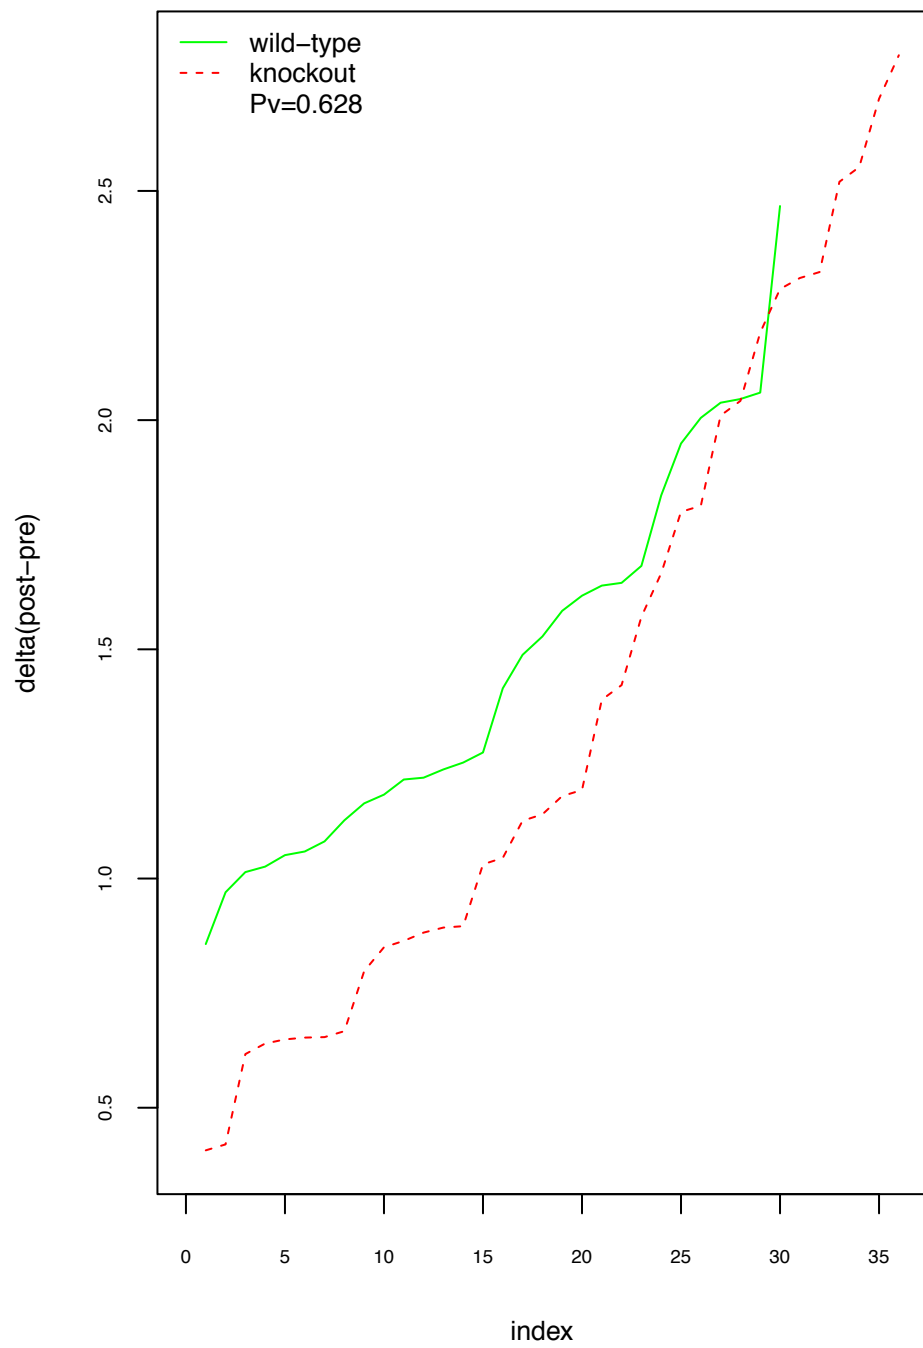

### Smad3

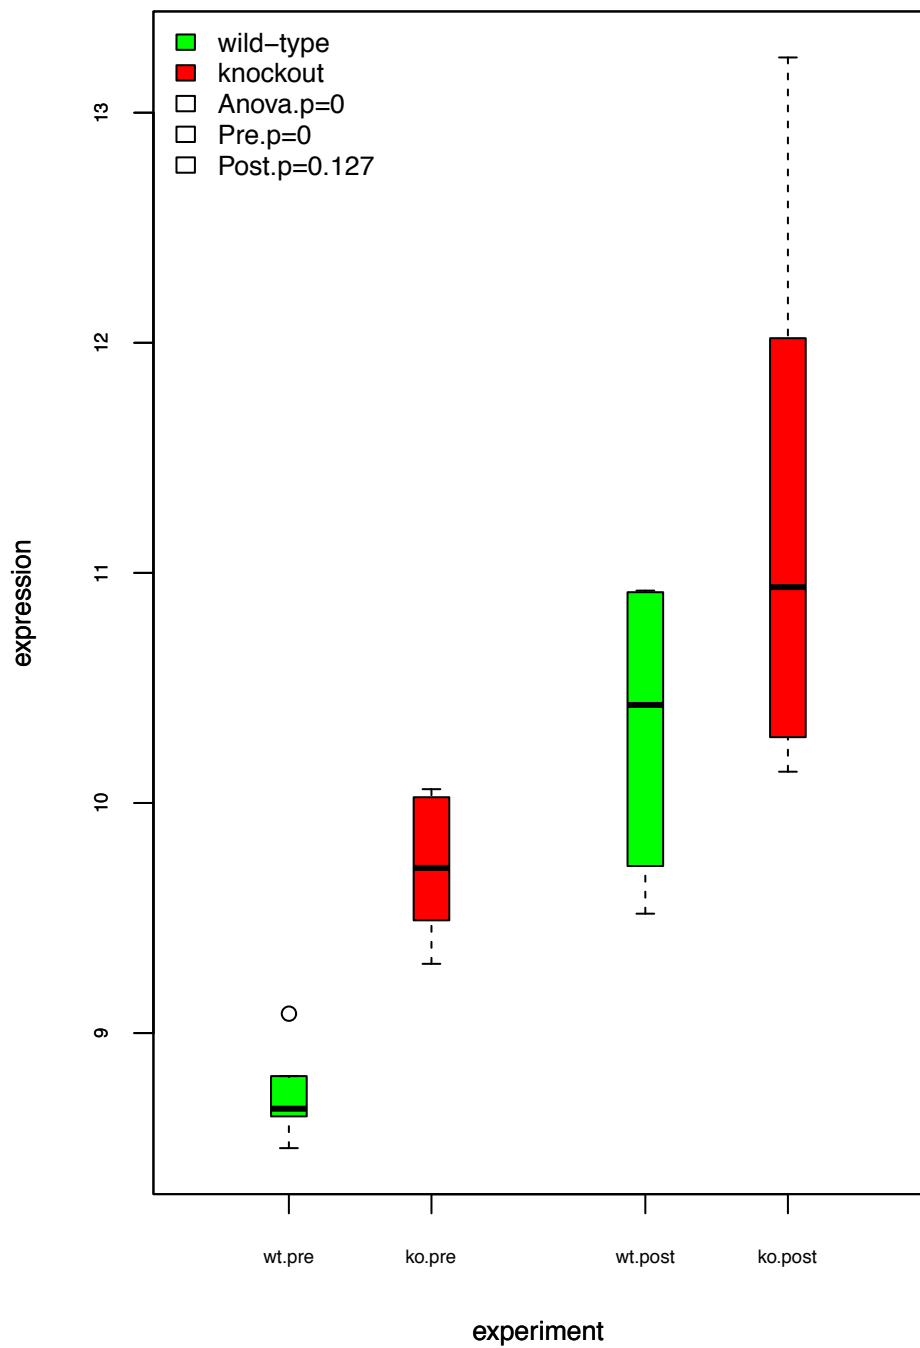

### Smad3

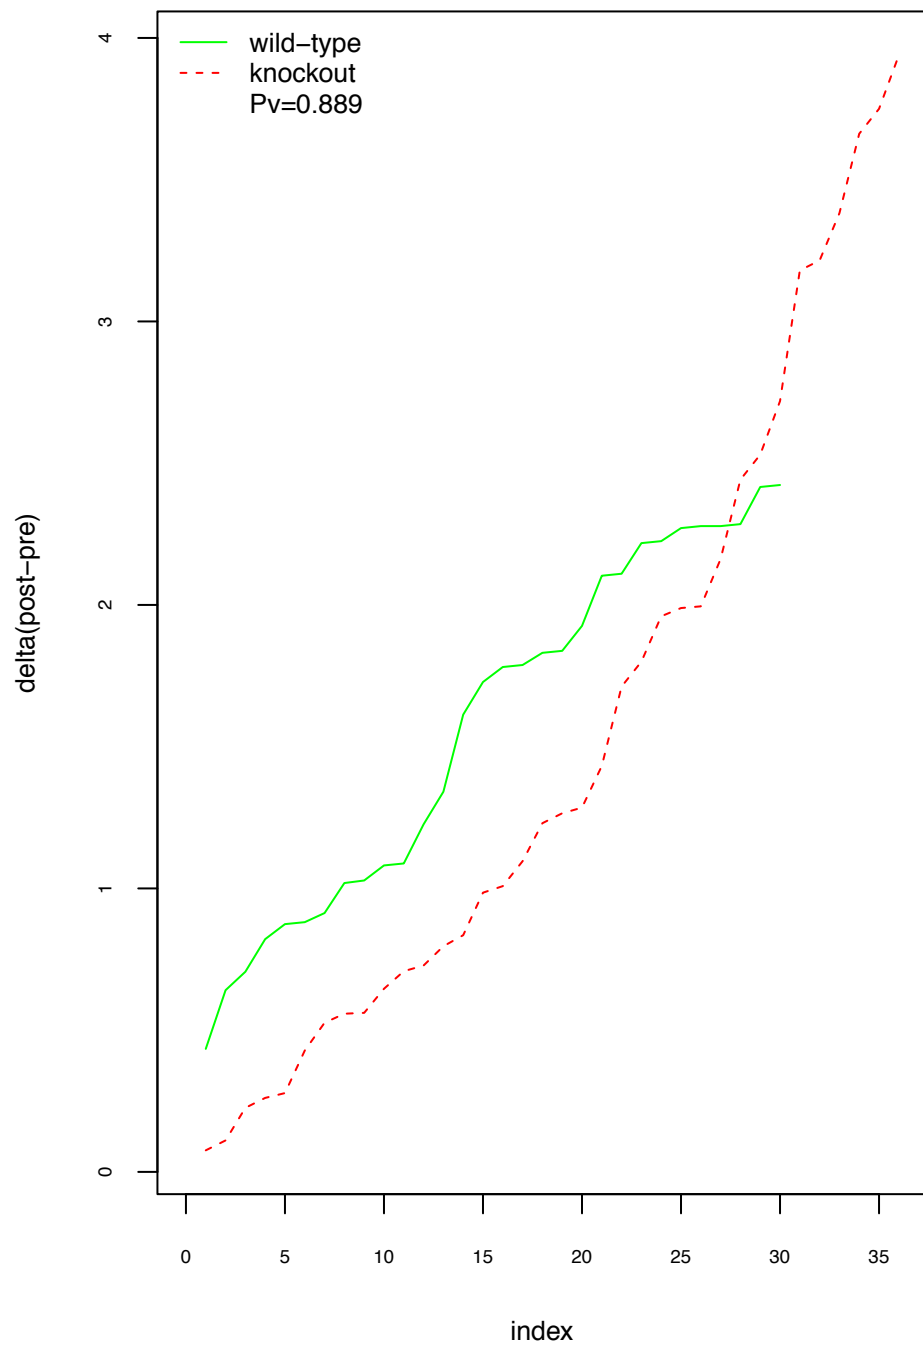

## Smad2

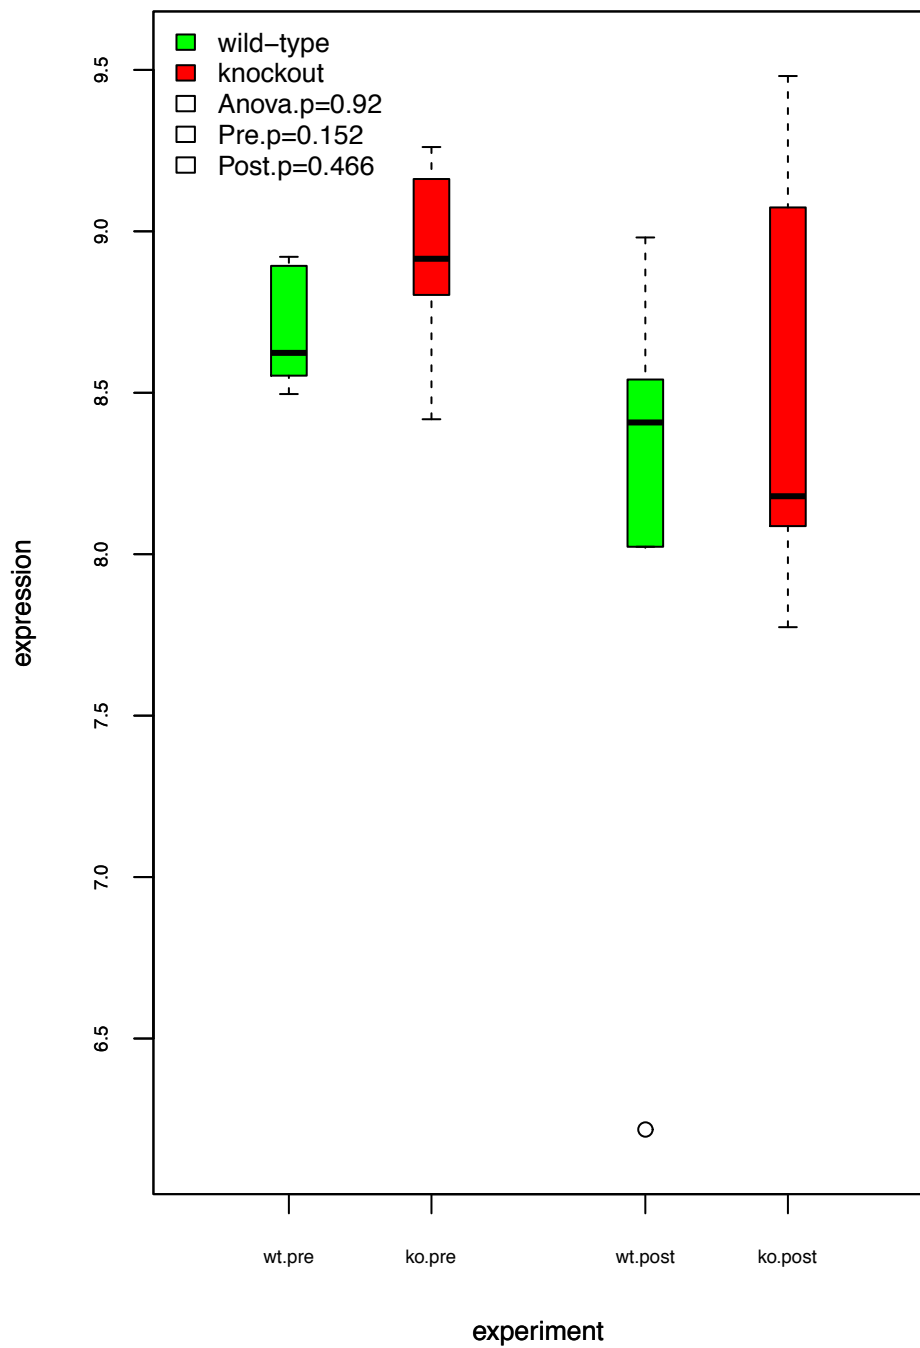

## Smad2

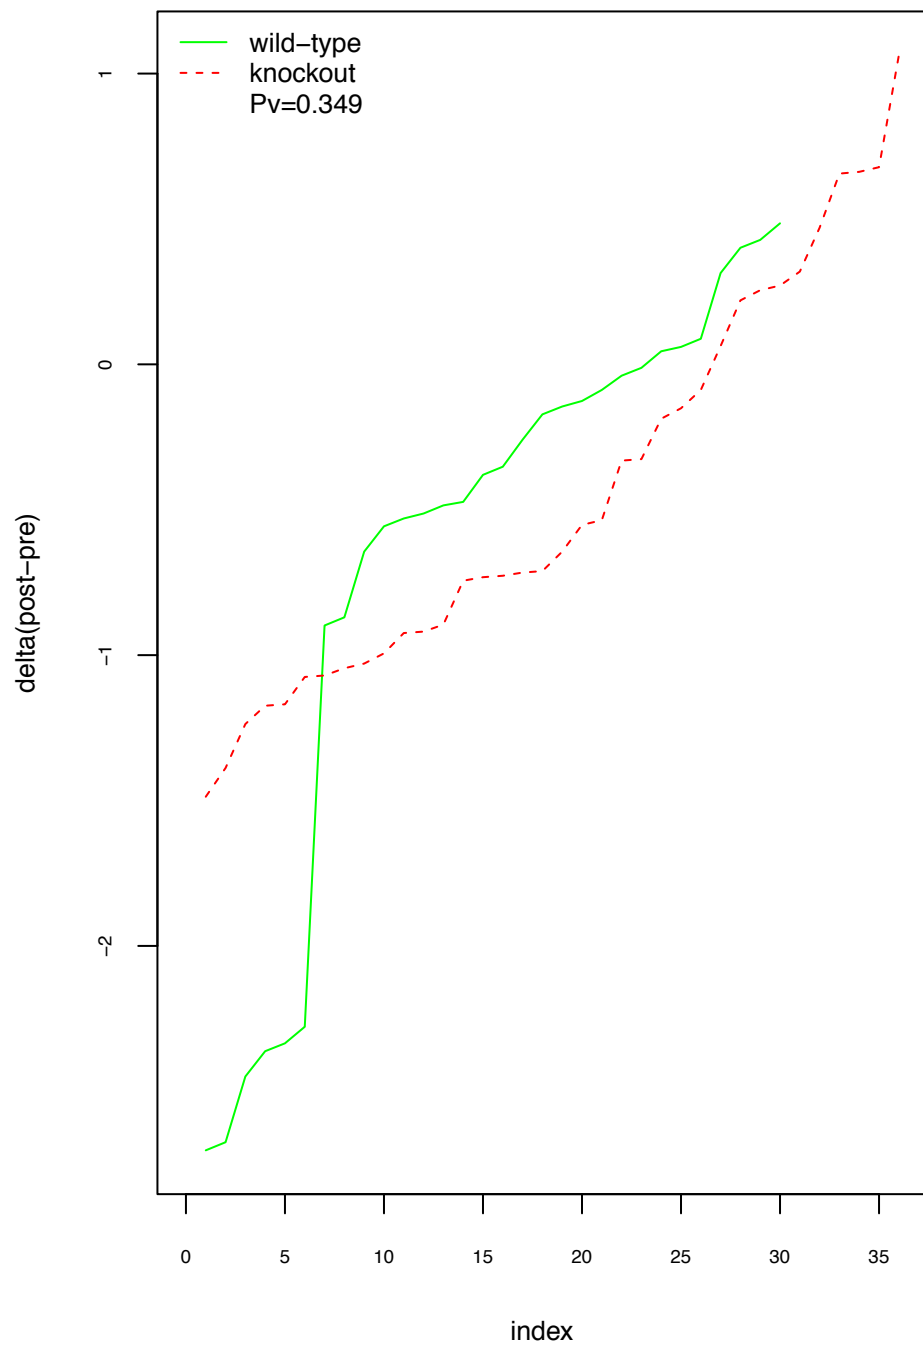

# Smad1

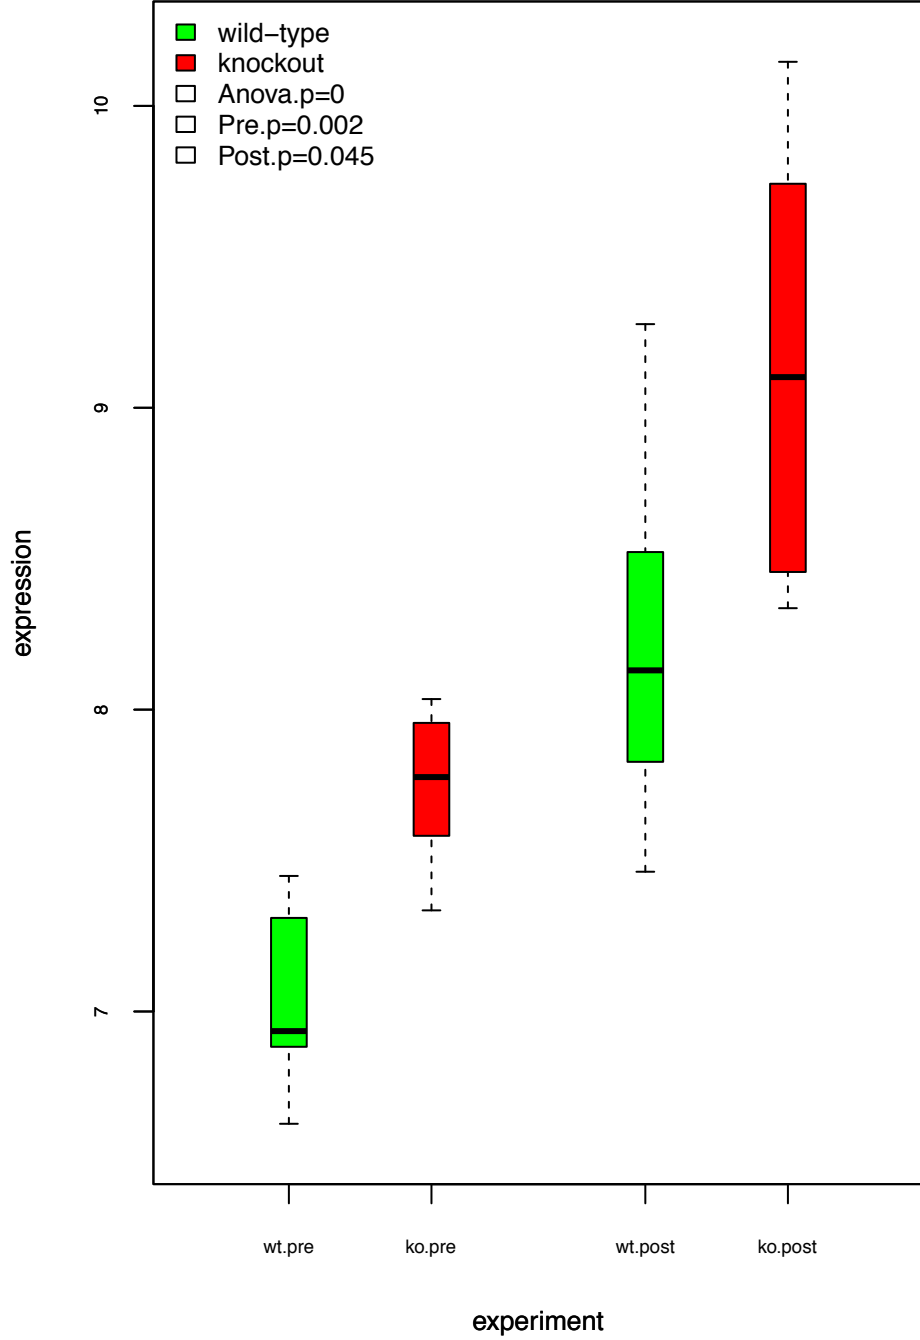

# Smad1

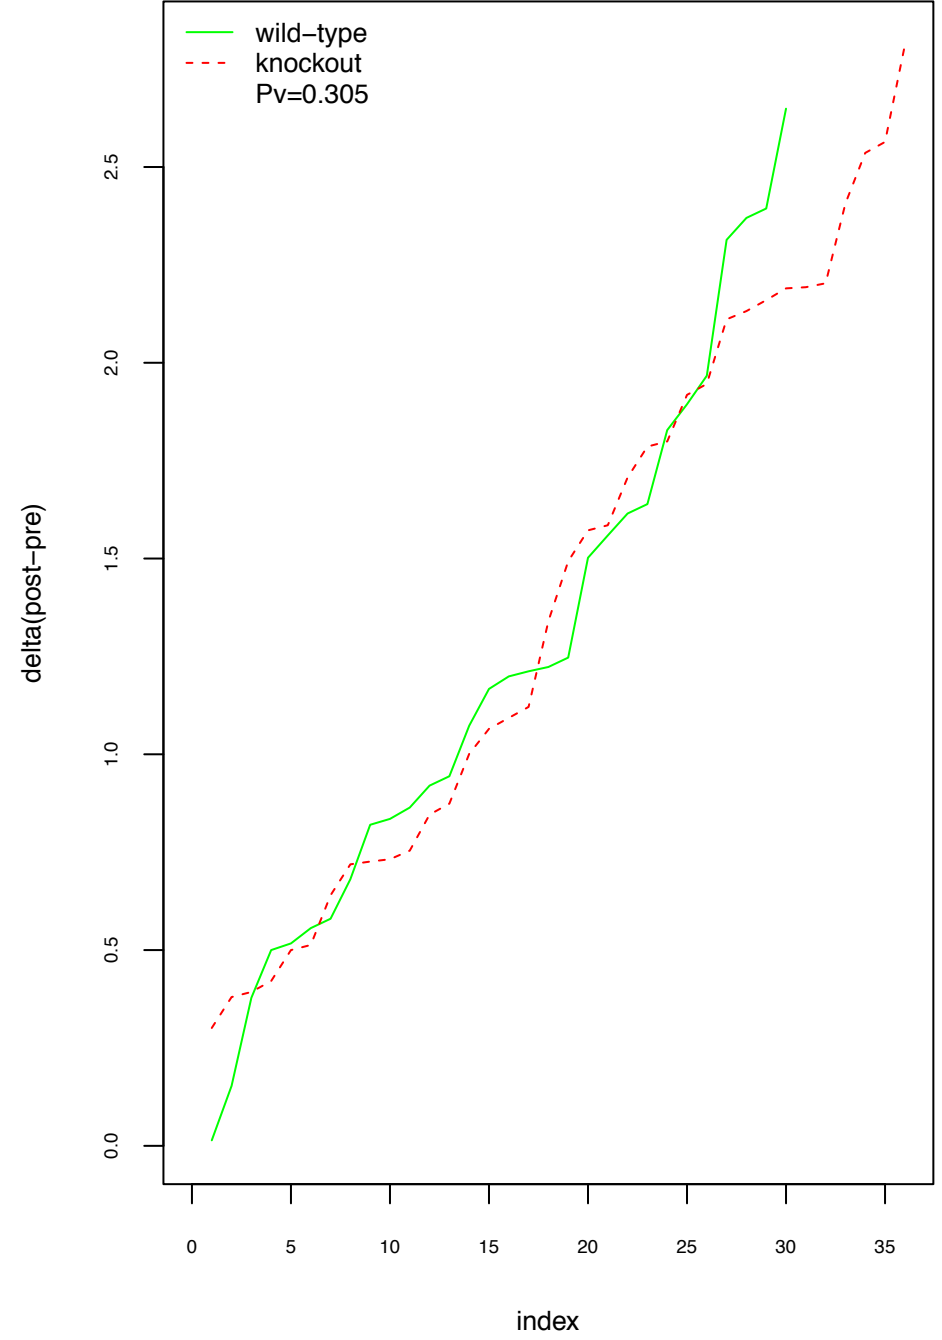

### Sfrp5

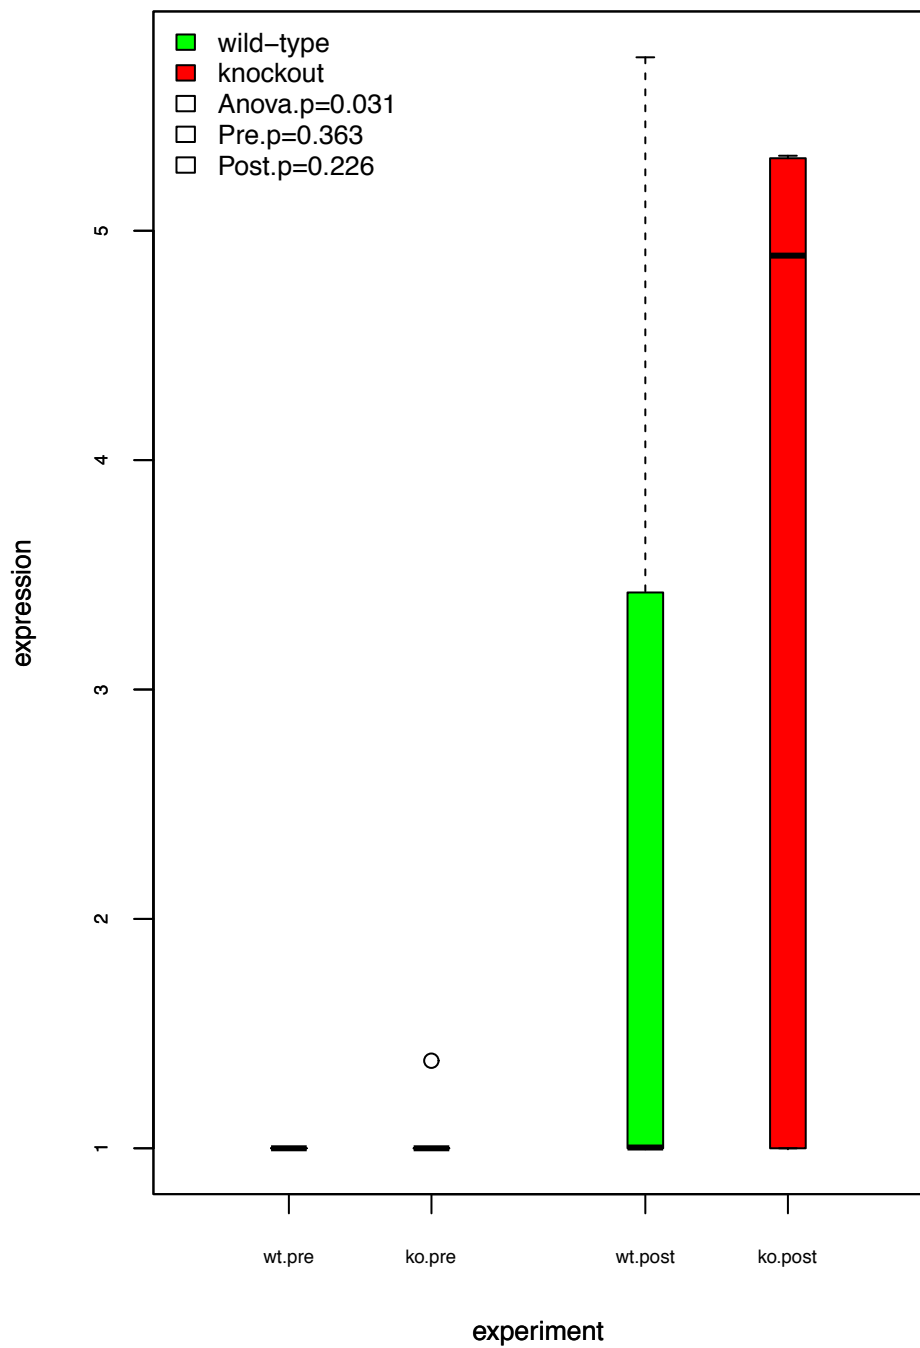

### Sfrp5

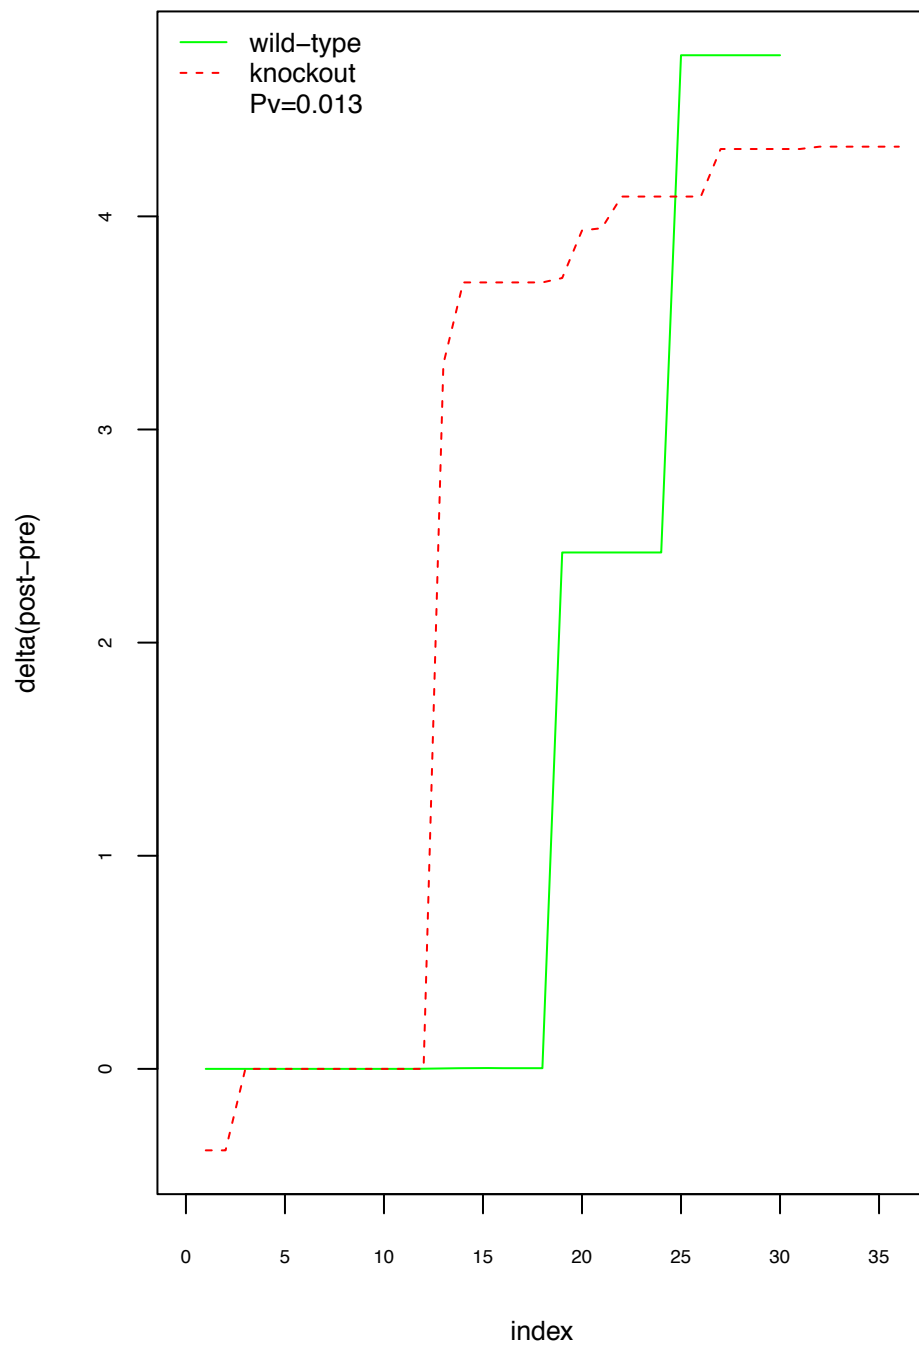

### Sfrp4

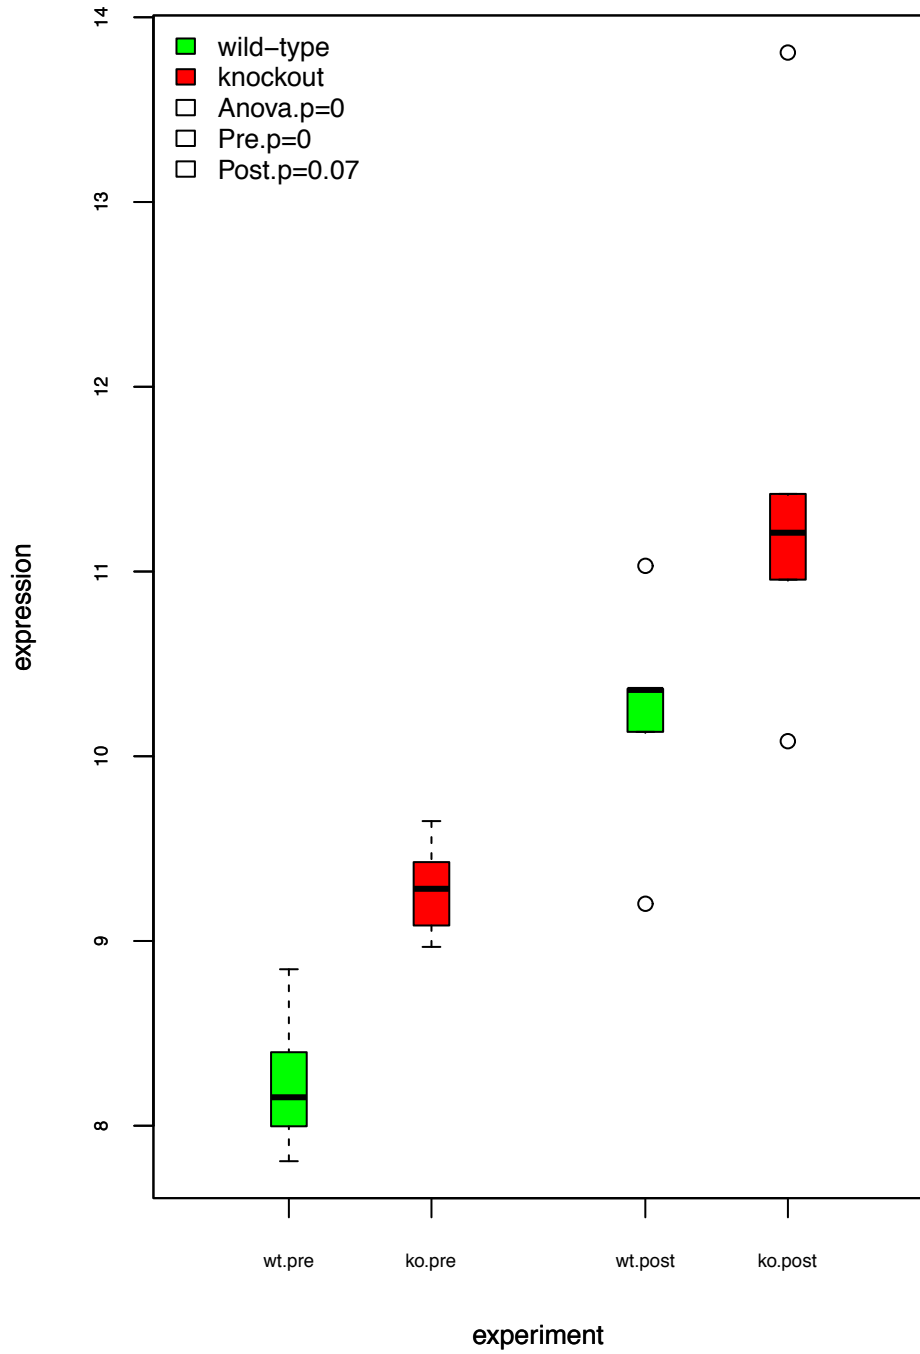

### Sfrp4

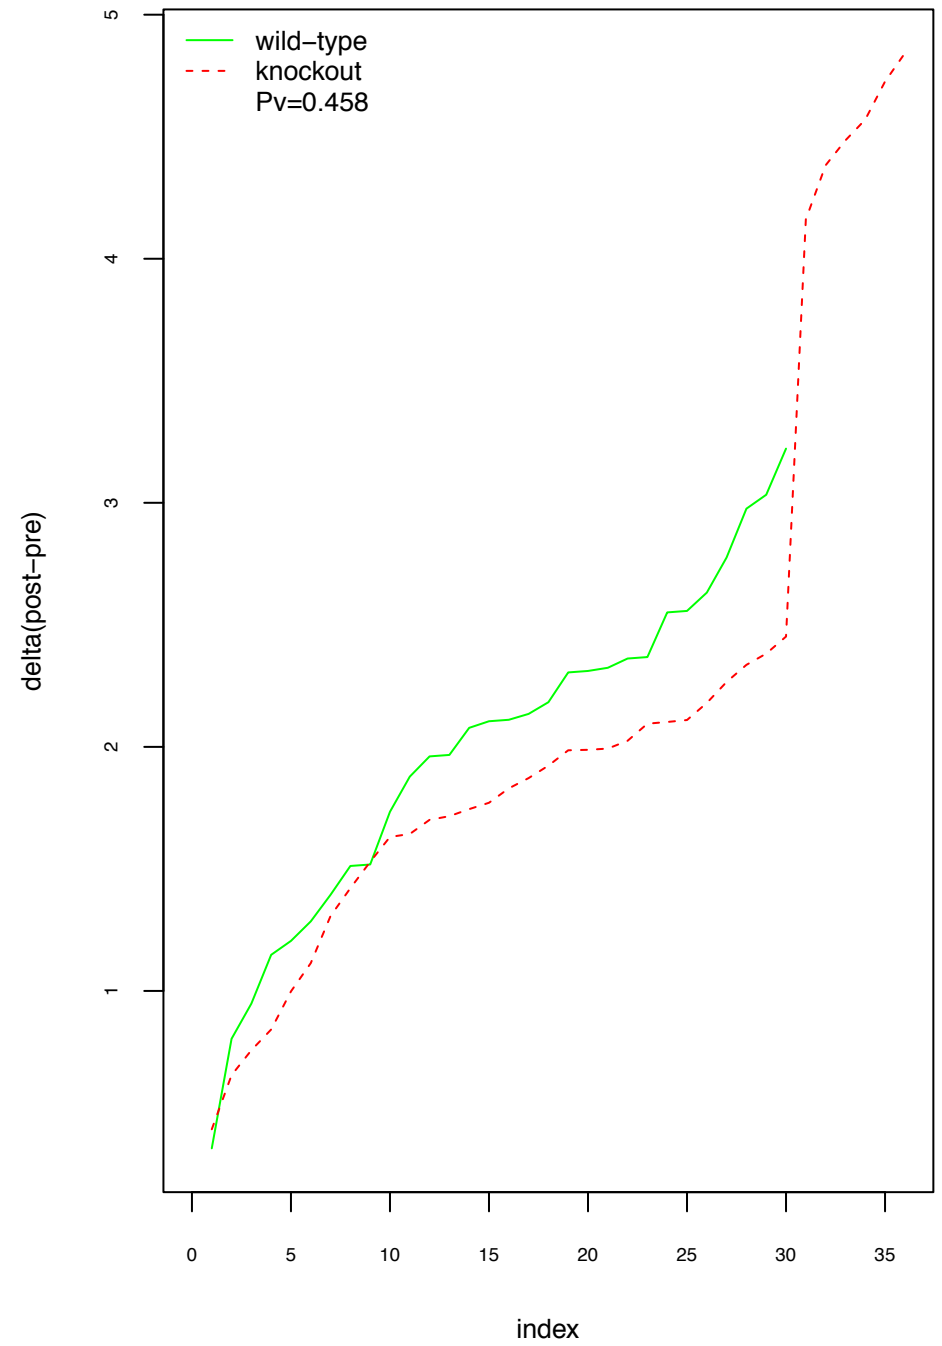



## Sfrp2

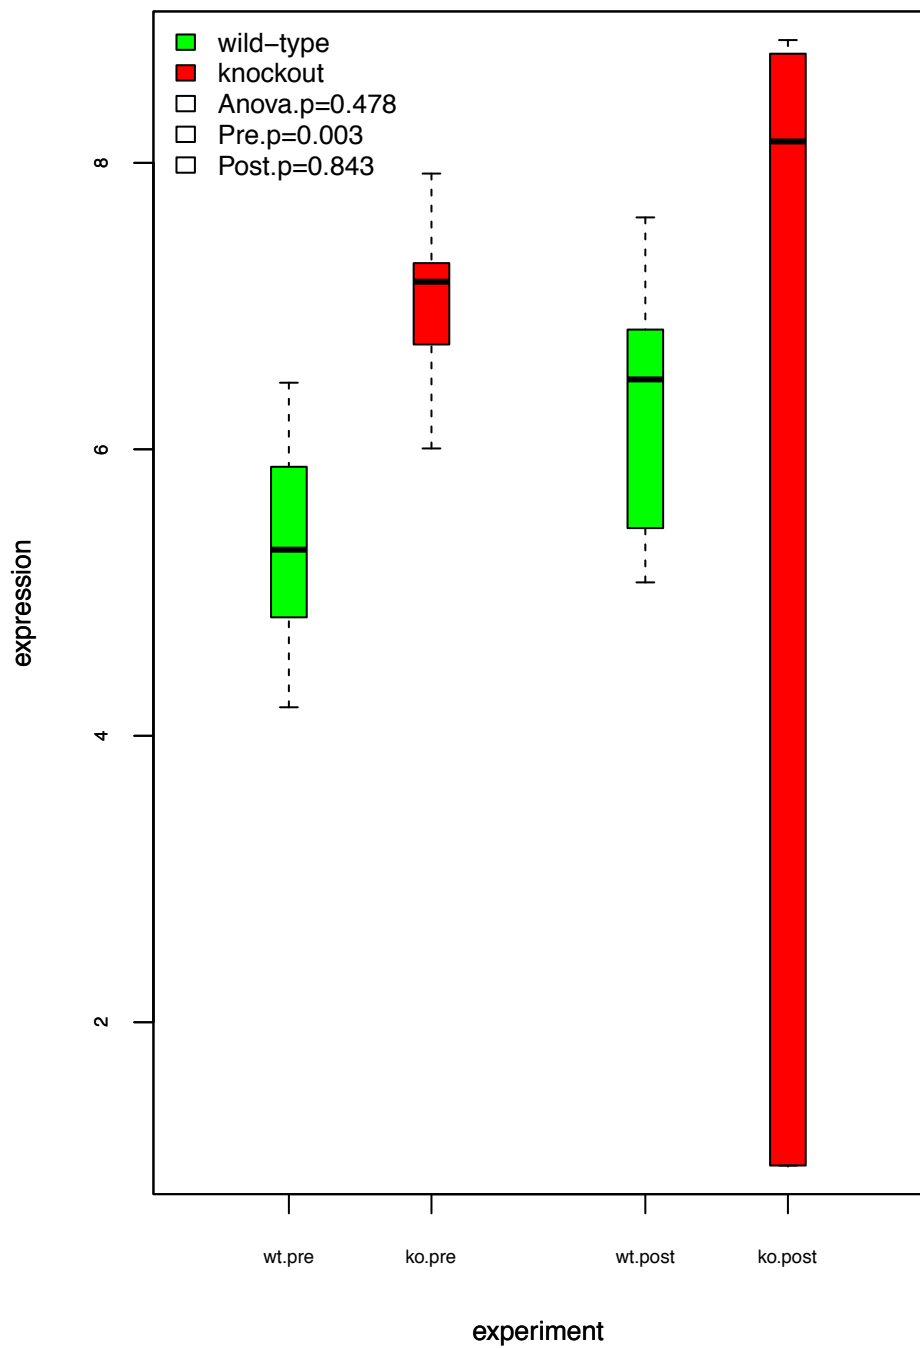

## Sfrp2

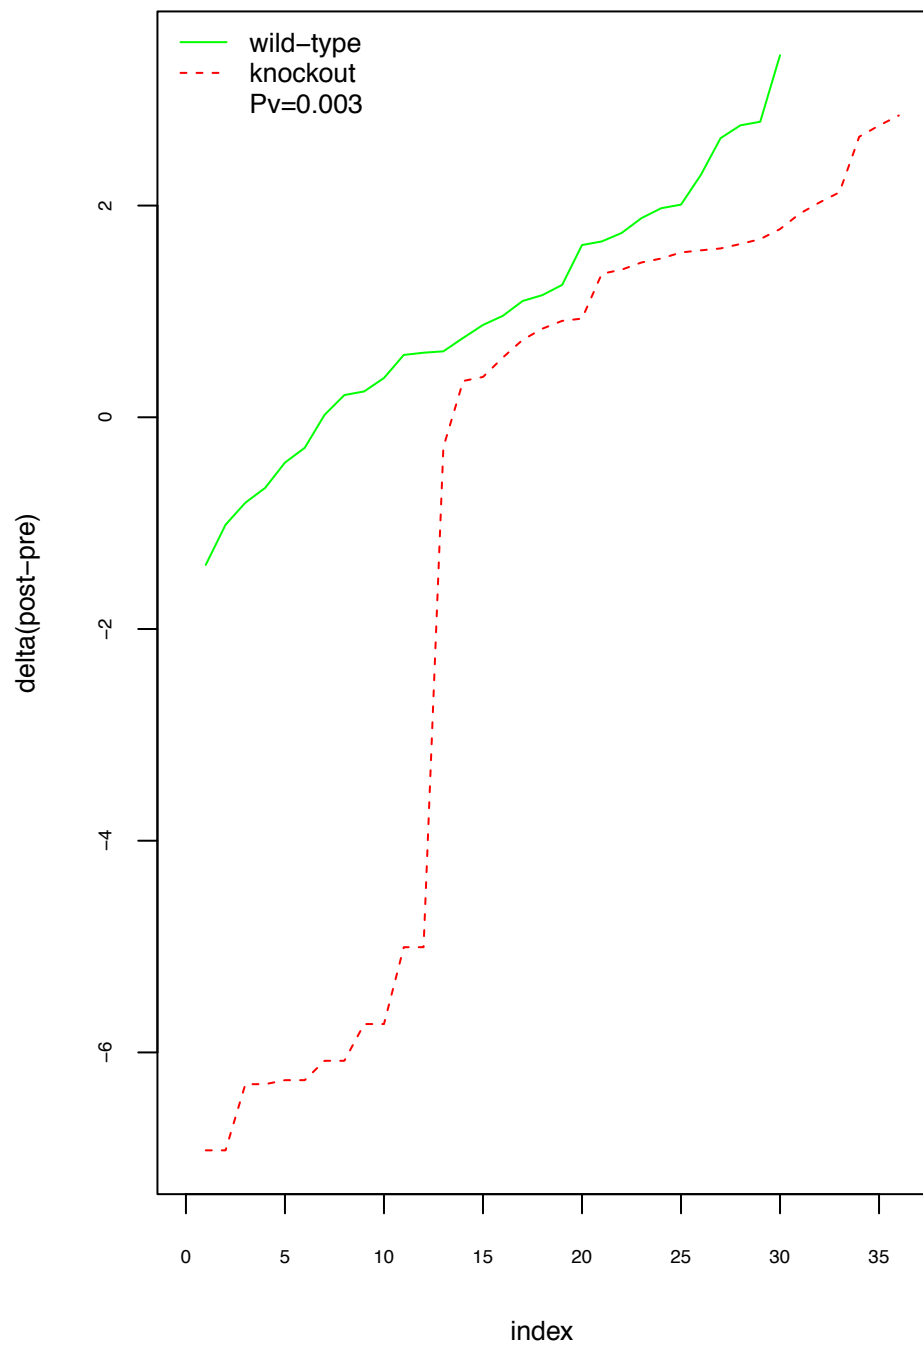

### Sfrp1

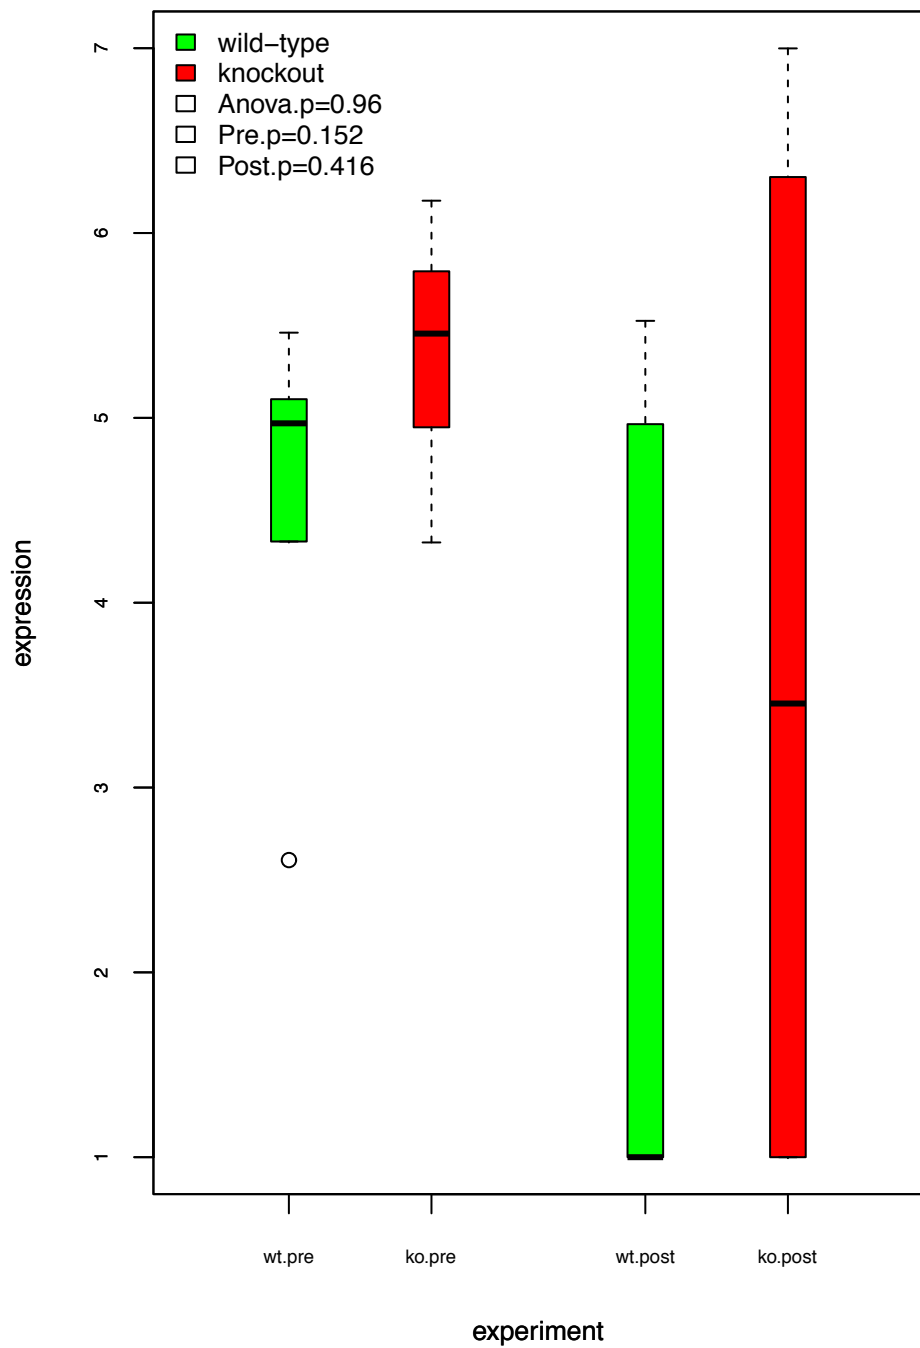

### Sfrp1

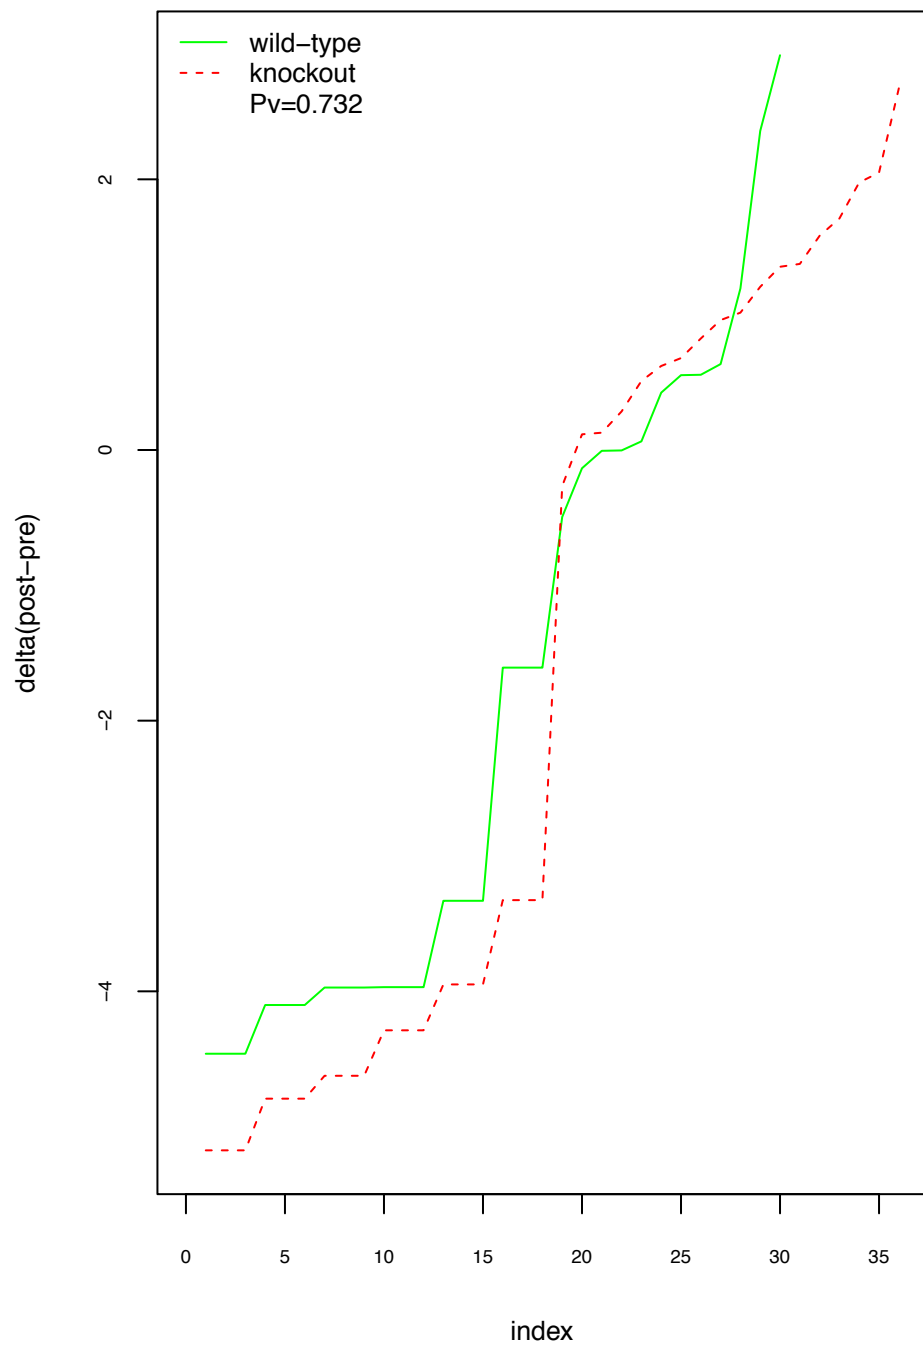

# Scx

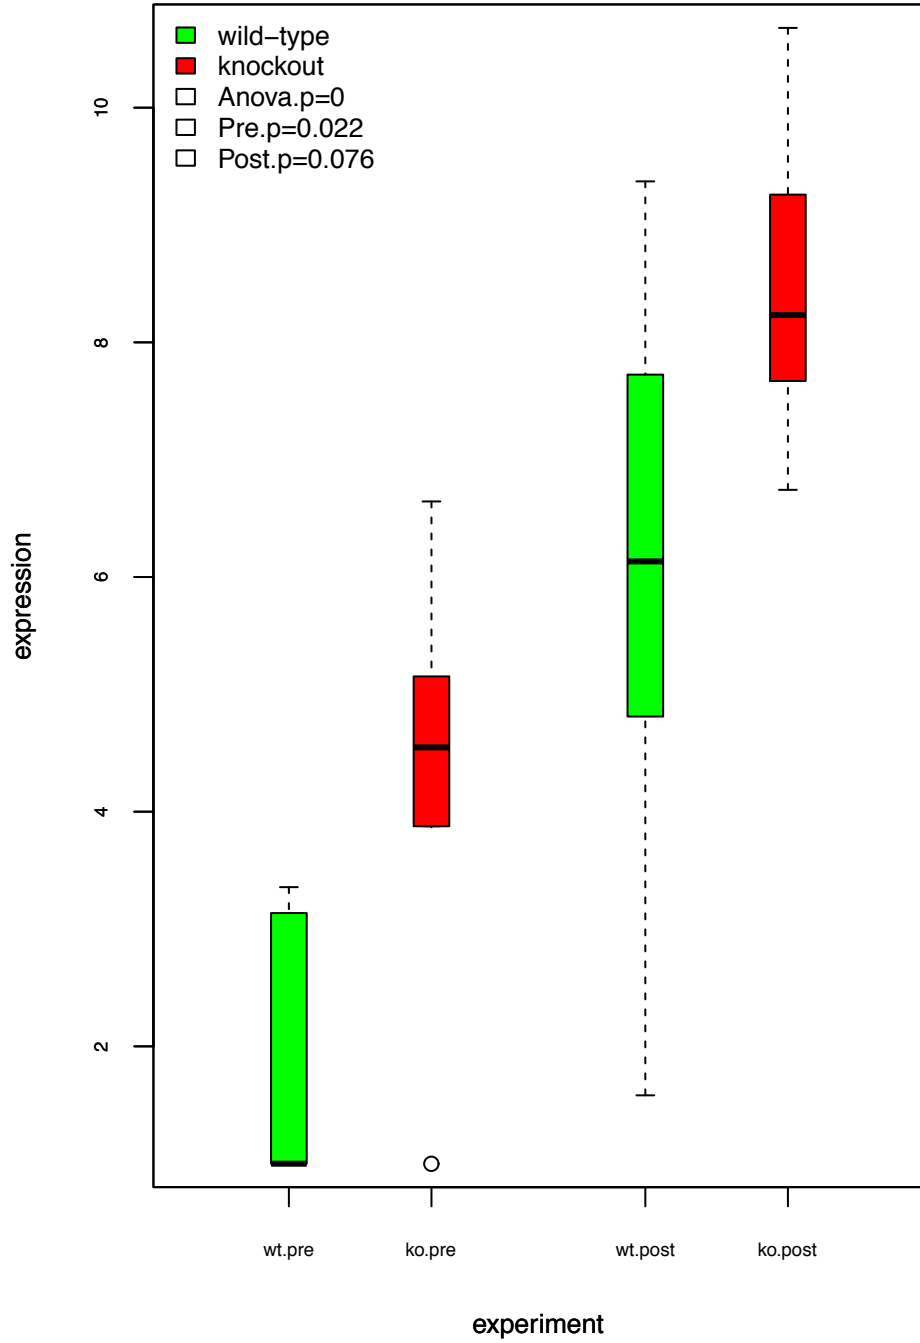

# Scx

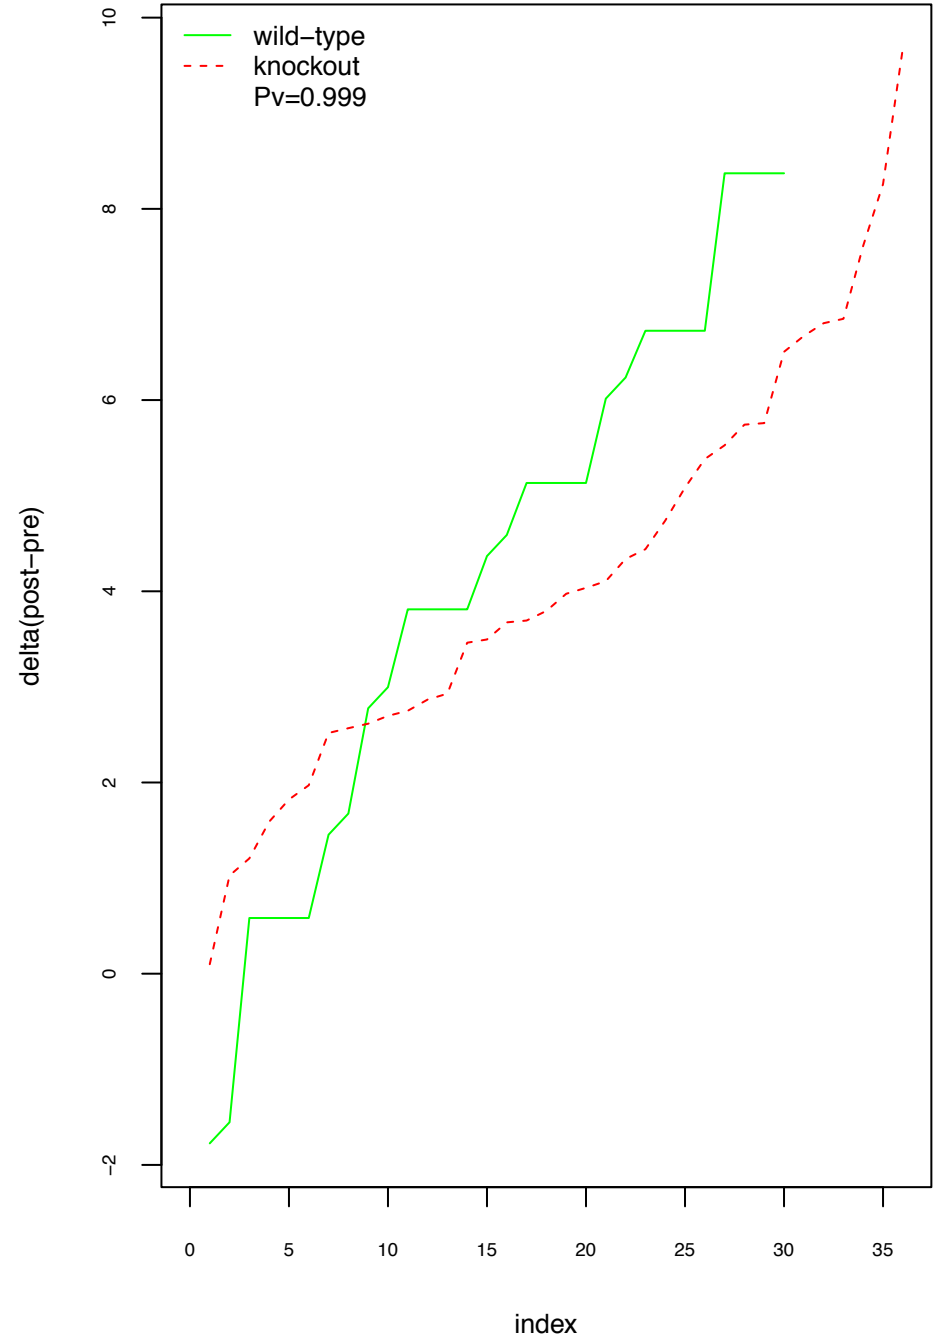

### Schnurri3

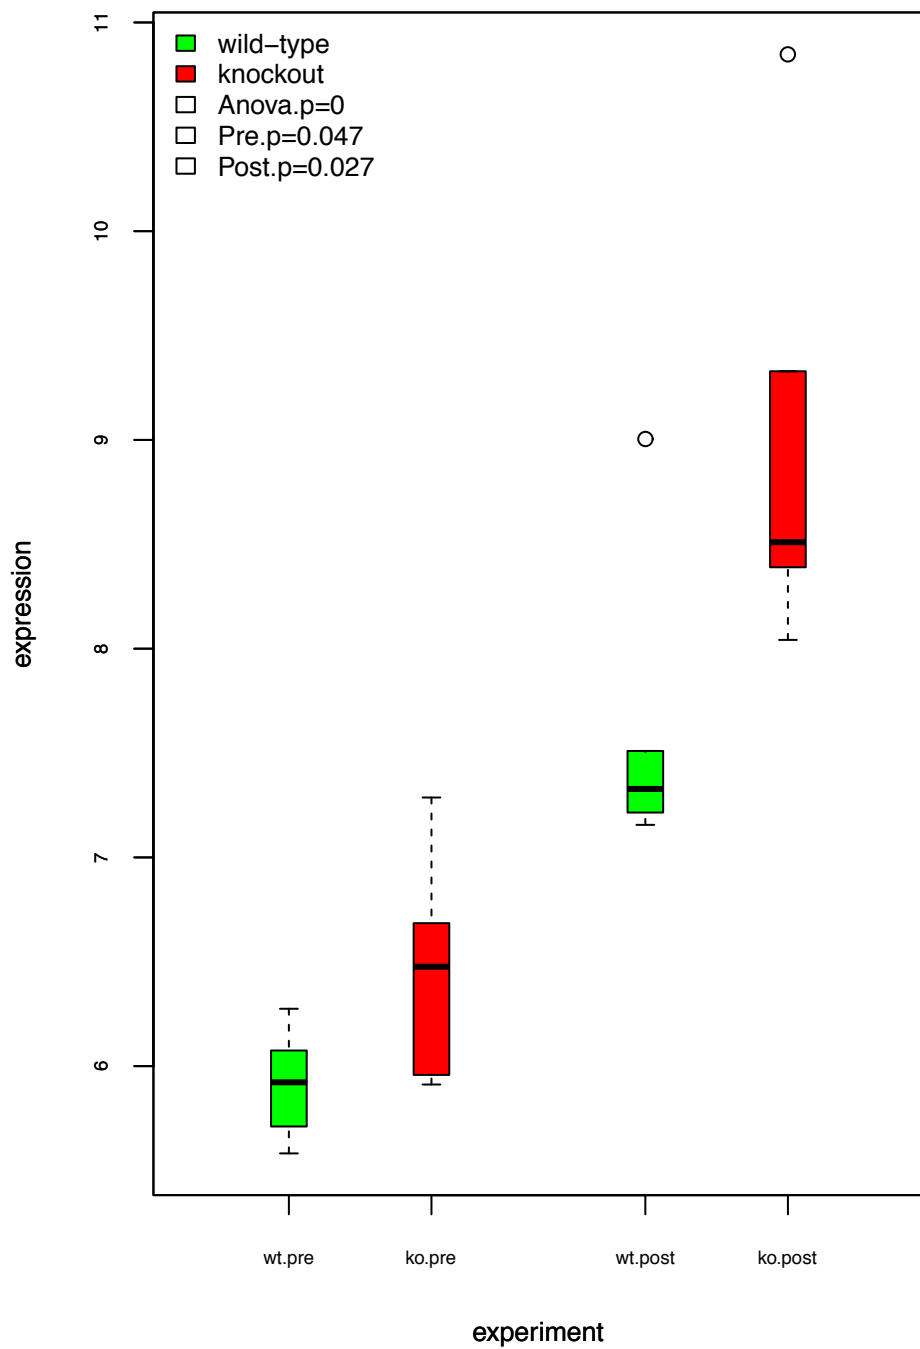

### Schnurri3

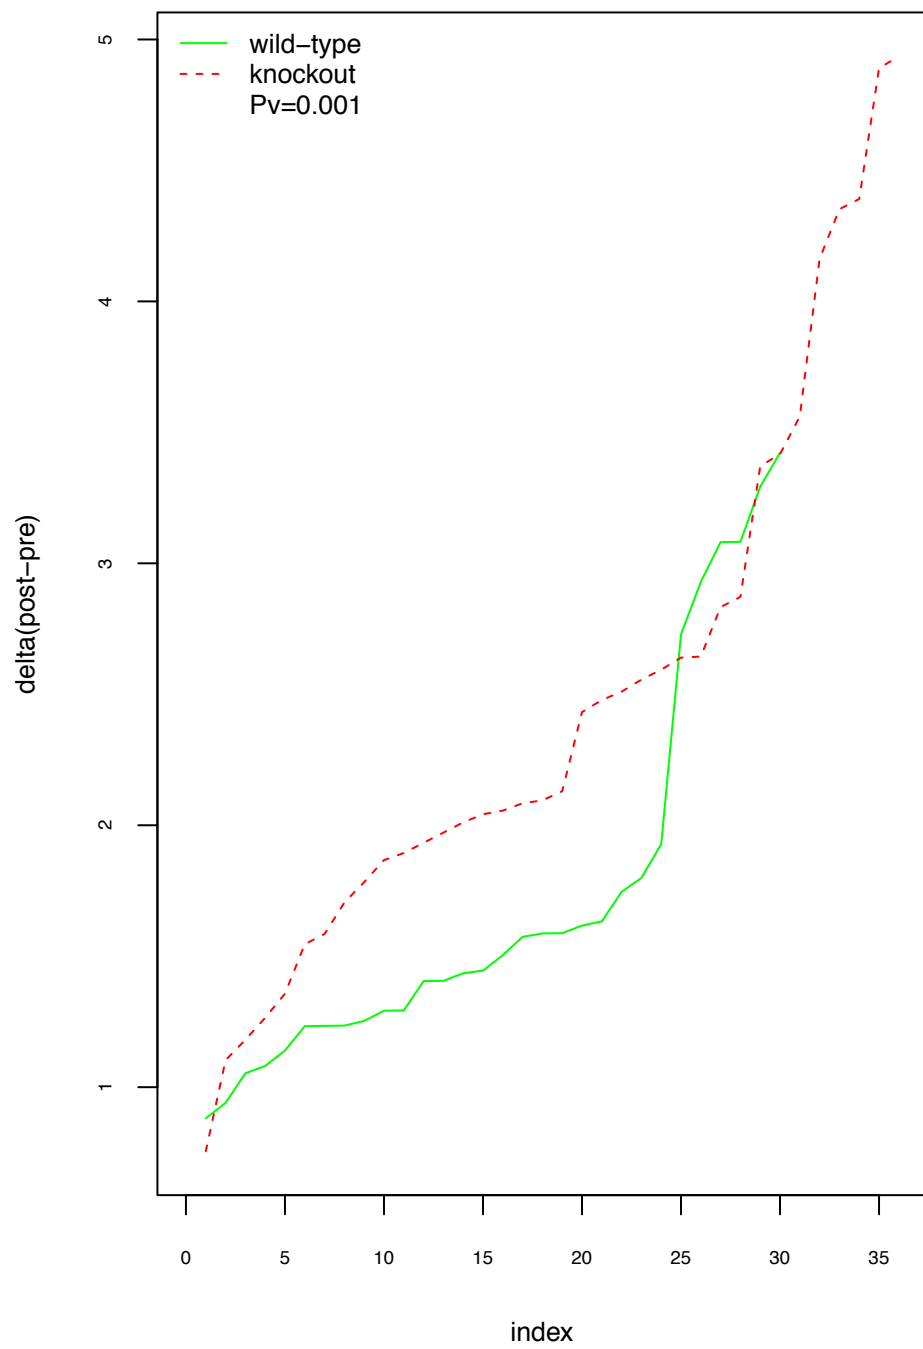

# TUBB5

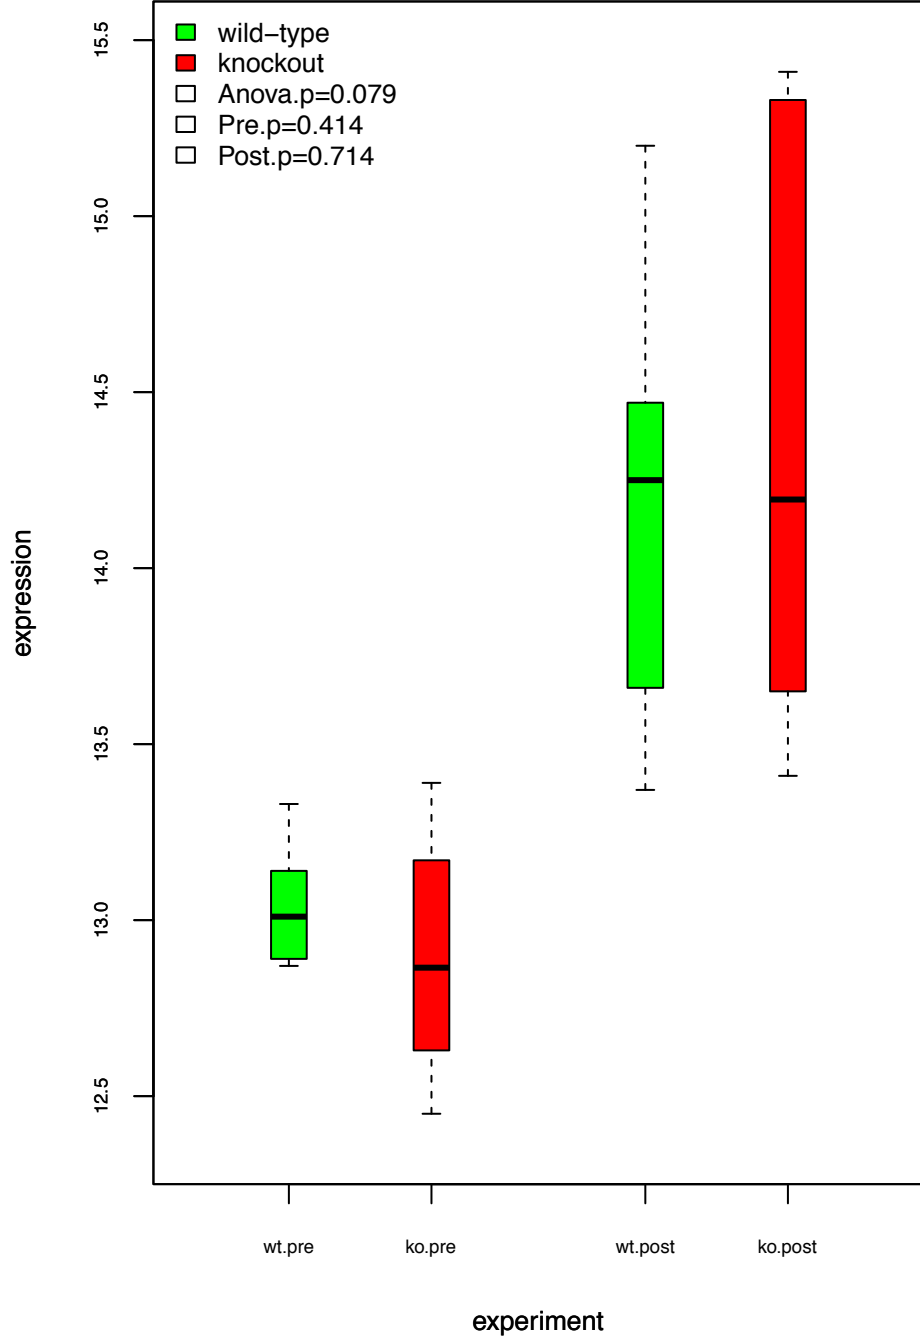

# TUBB5

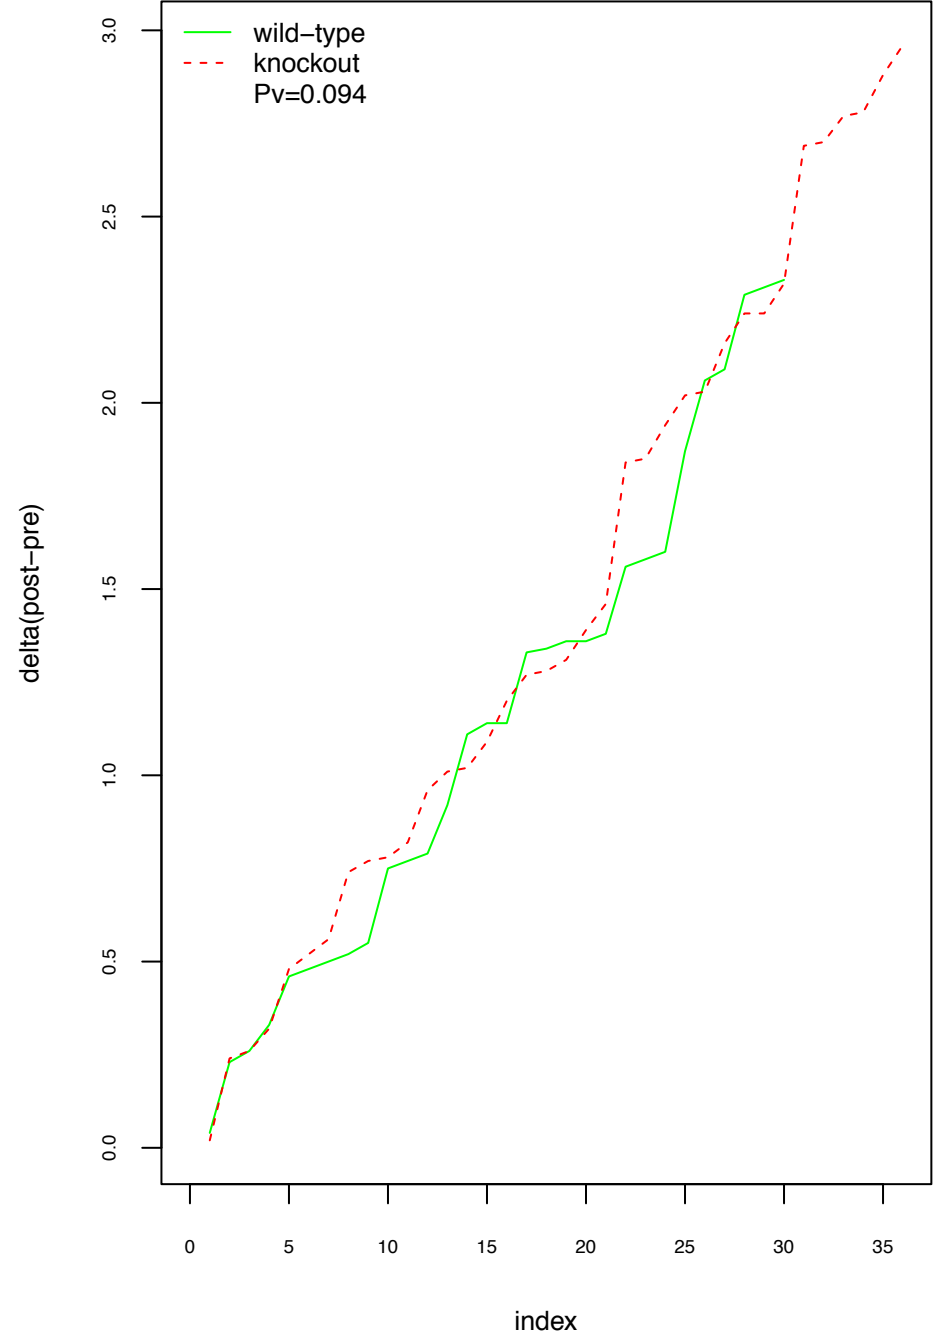

### TRbeta

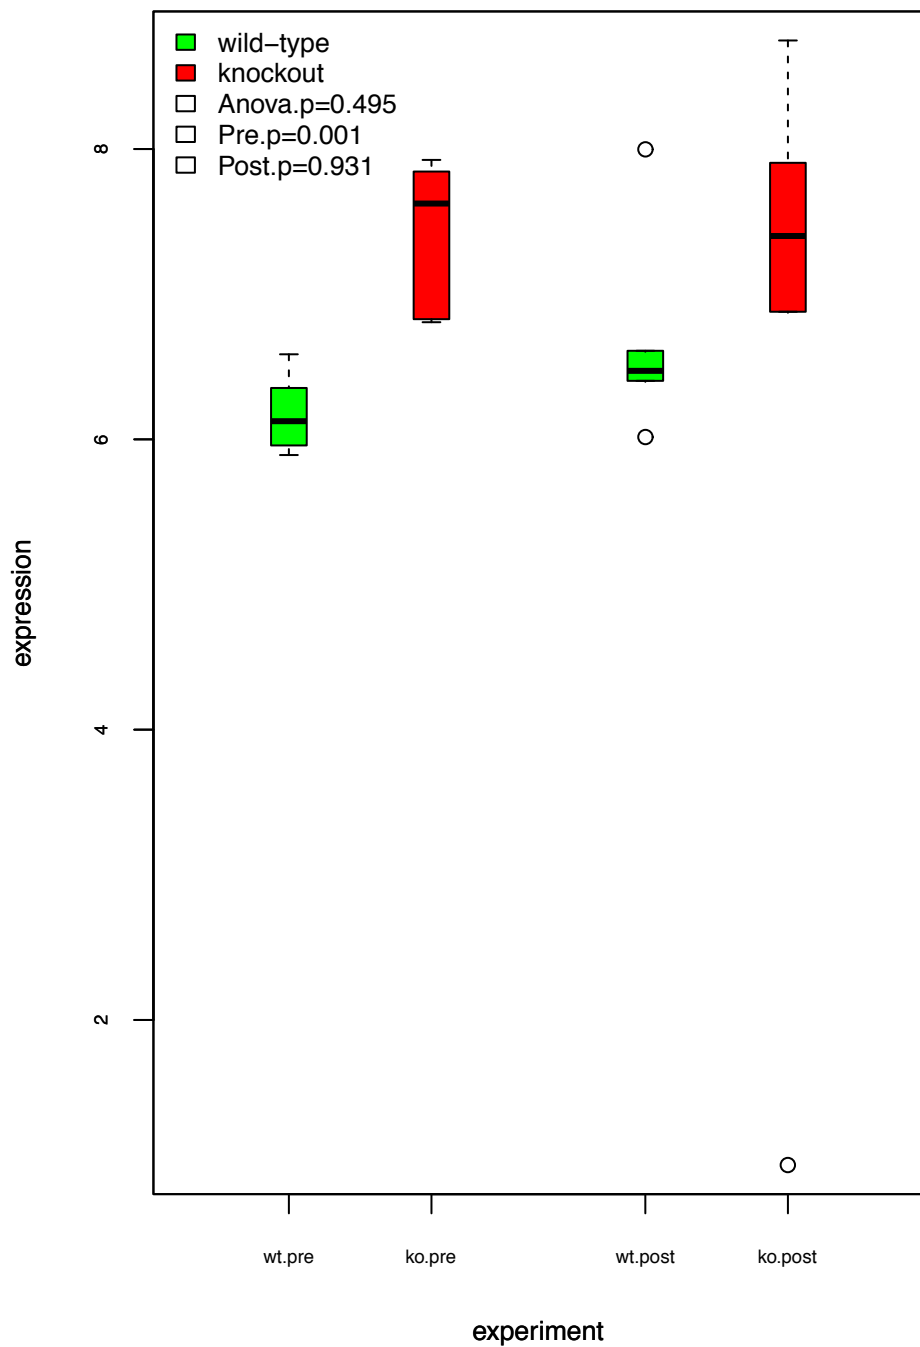

### TRbeta

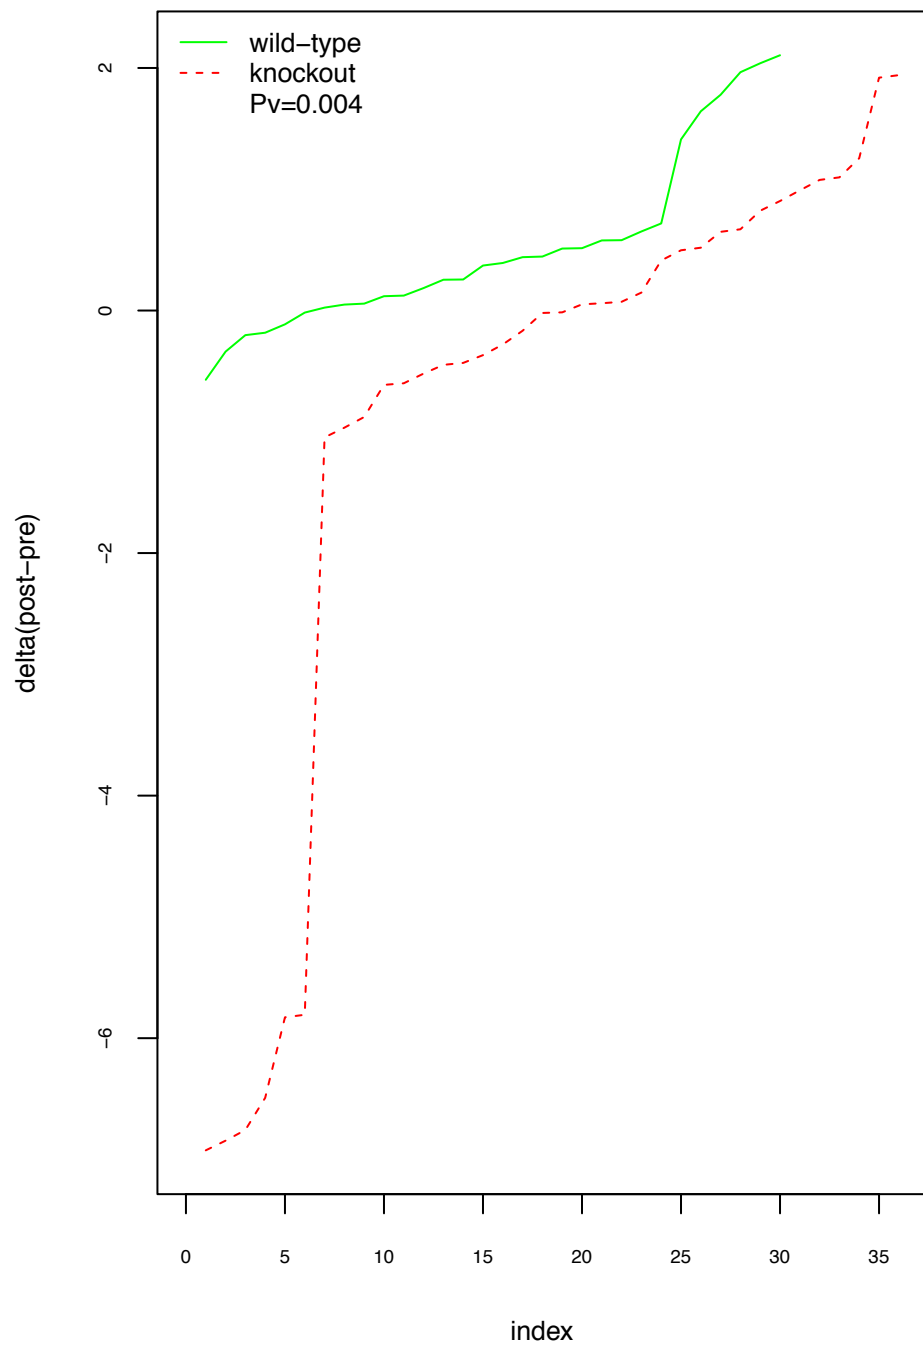

## TRalpha

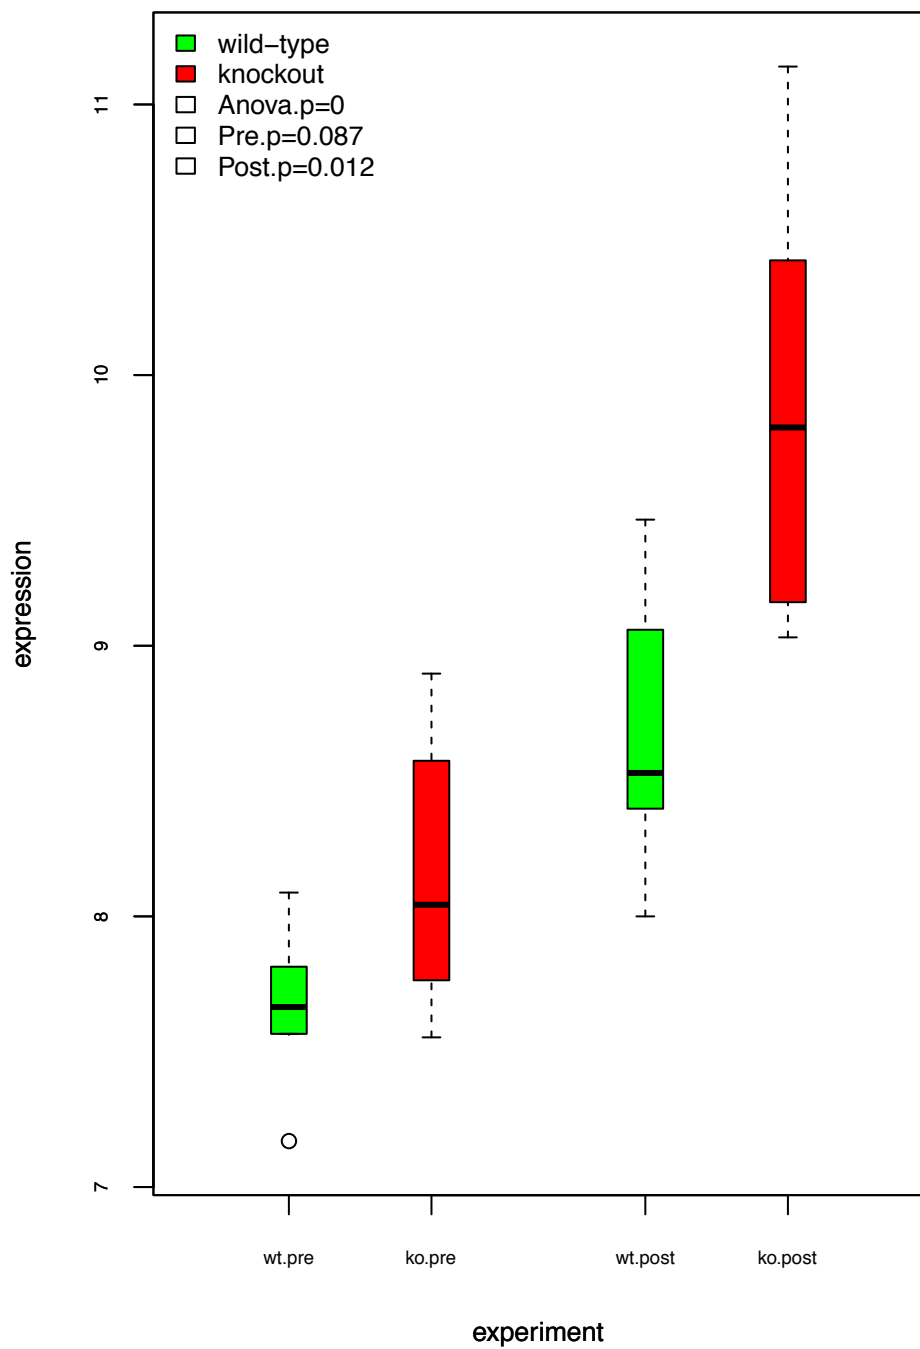

## TRalpha

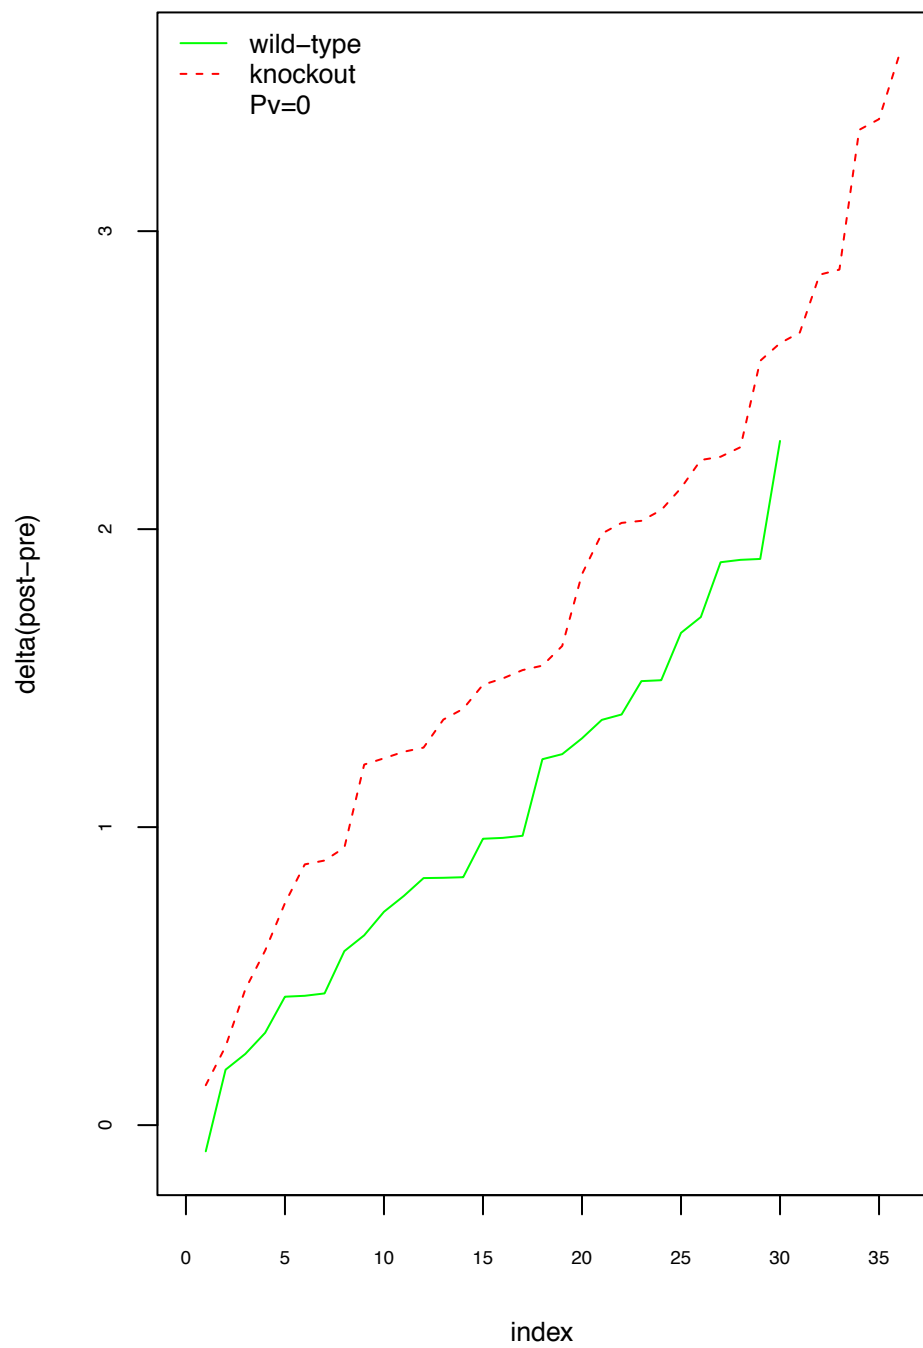

# Tnn

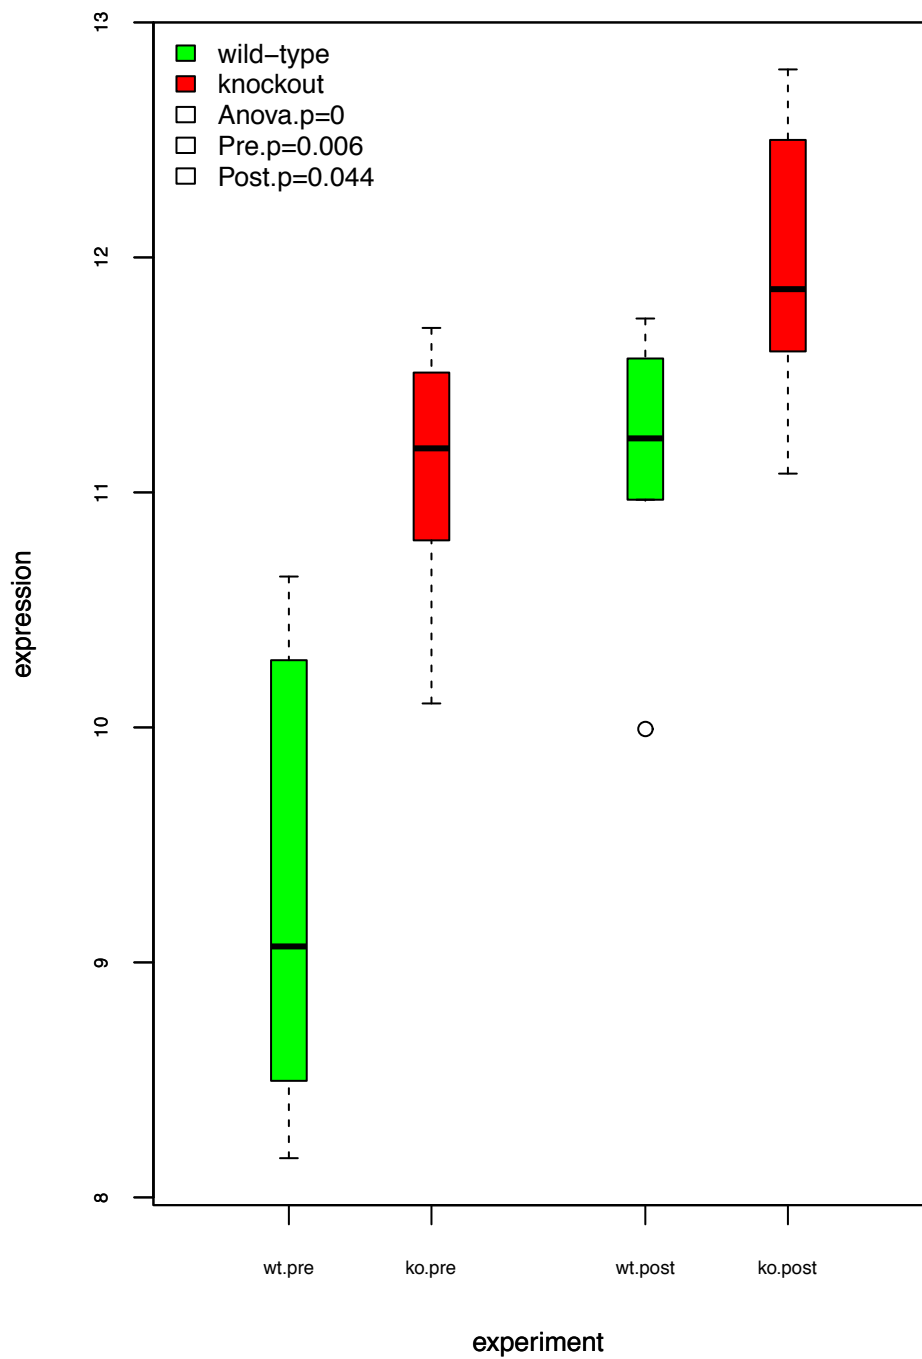

# Tnn

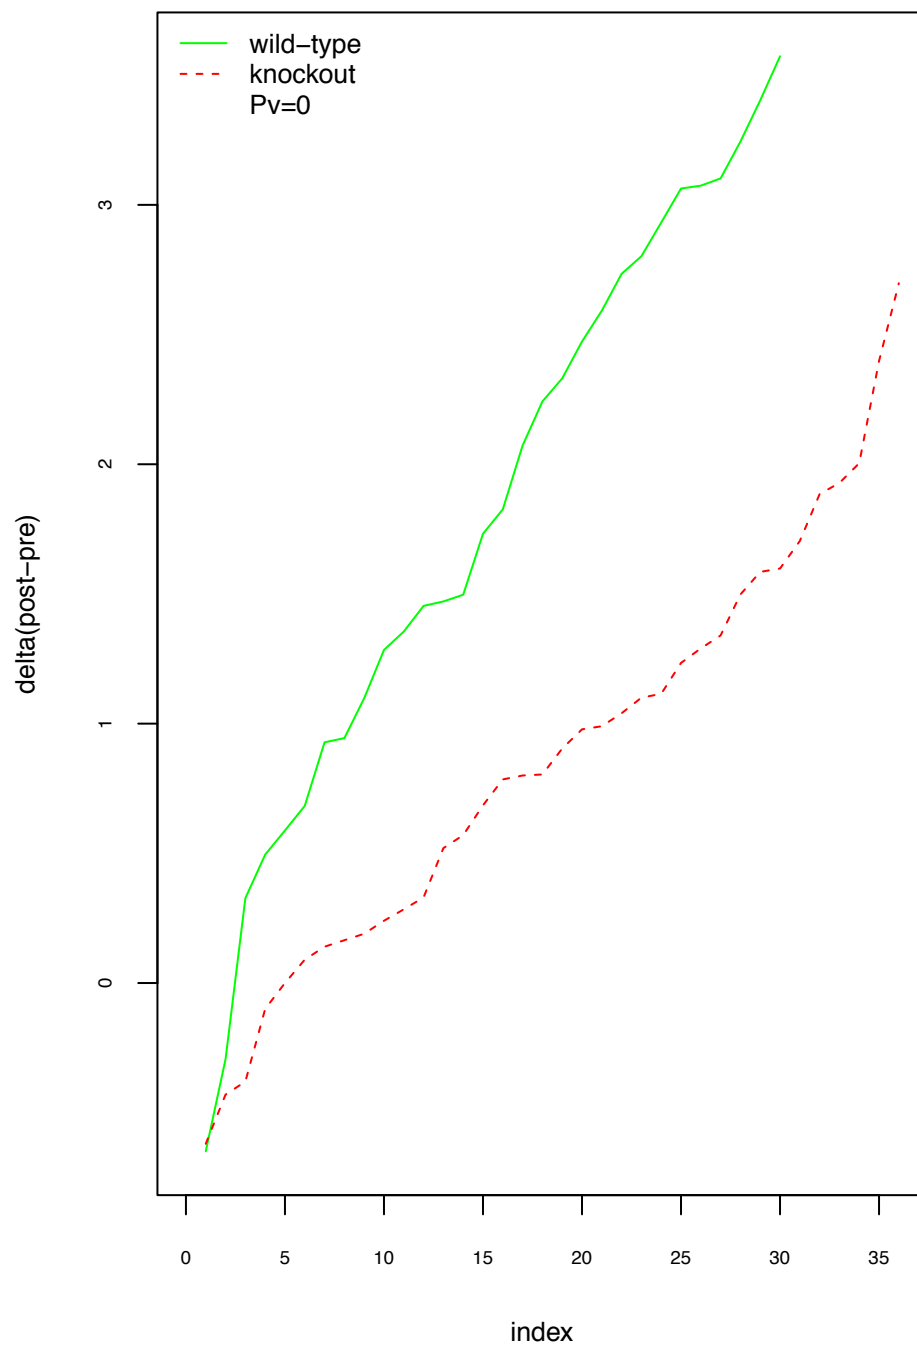



### Tnfrsf1a

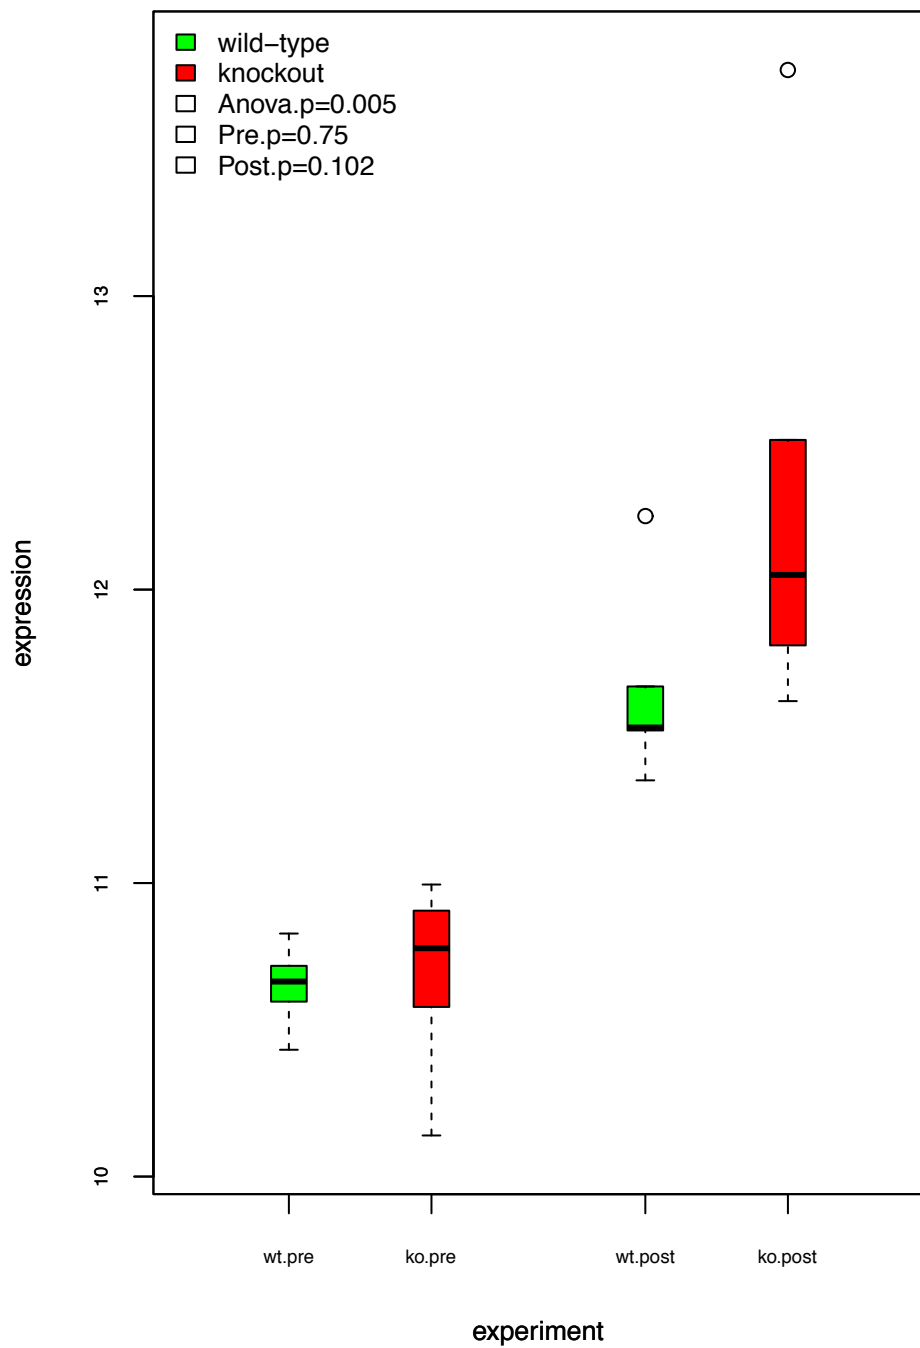

### Tnfrsf1a

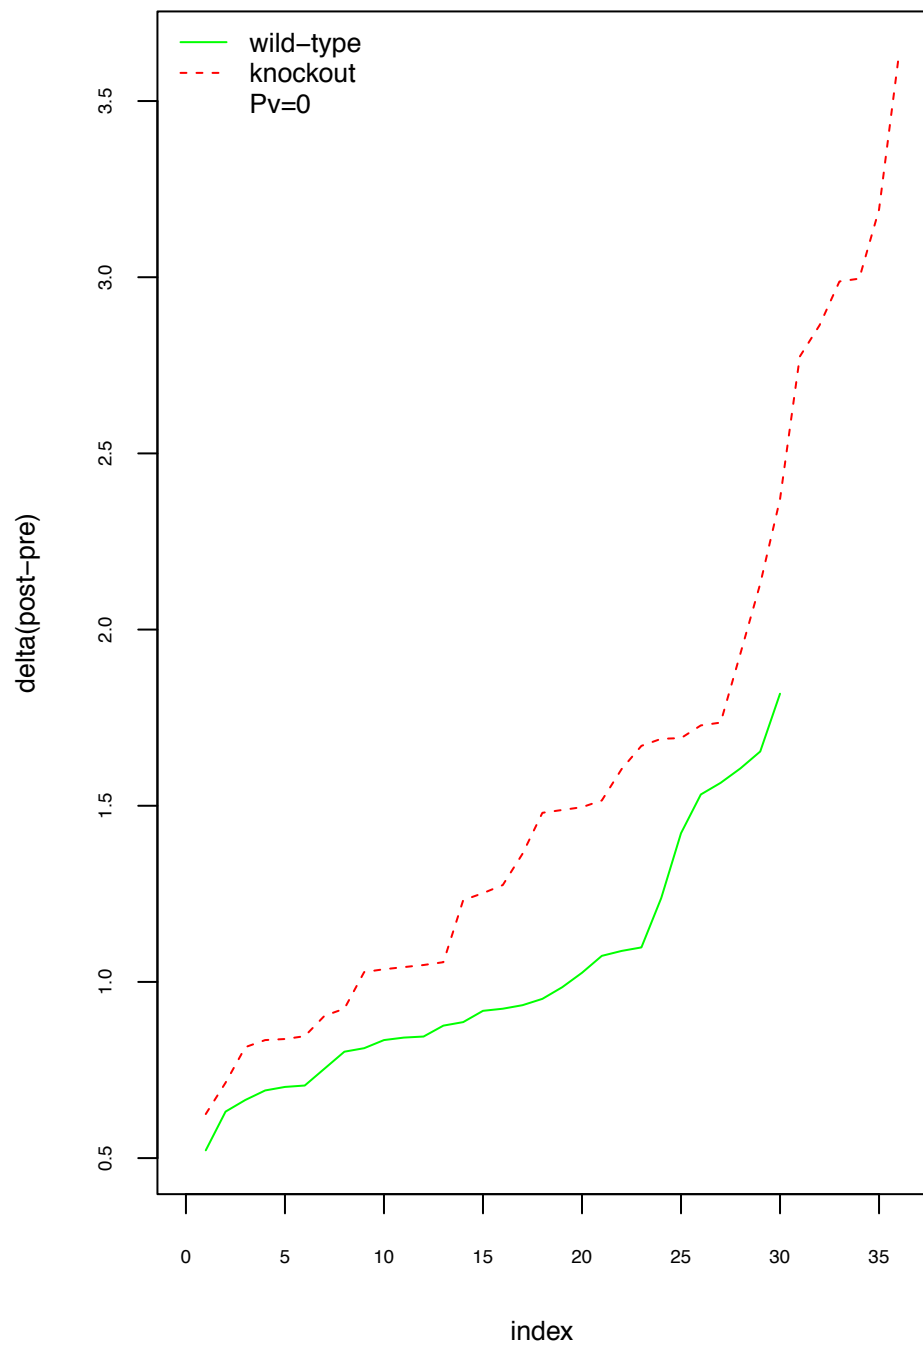

# Tnf

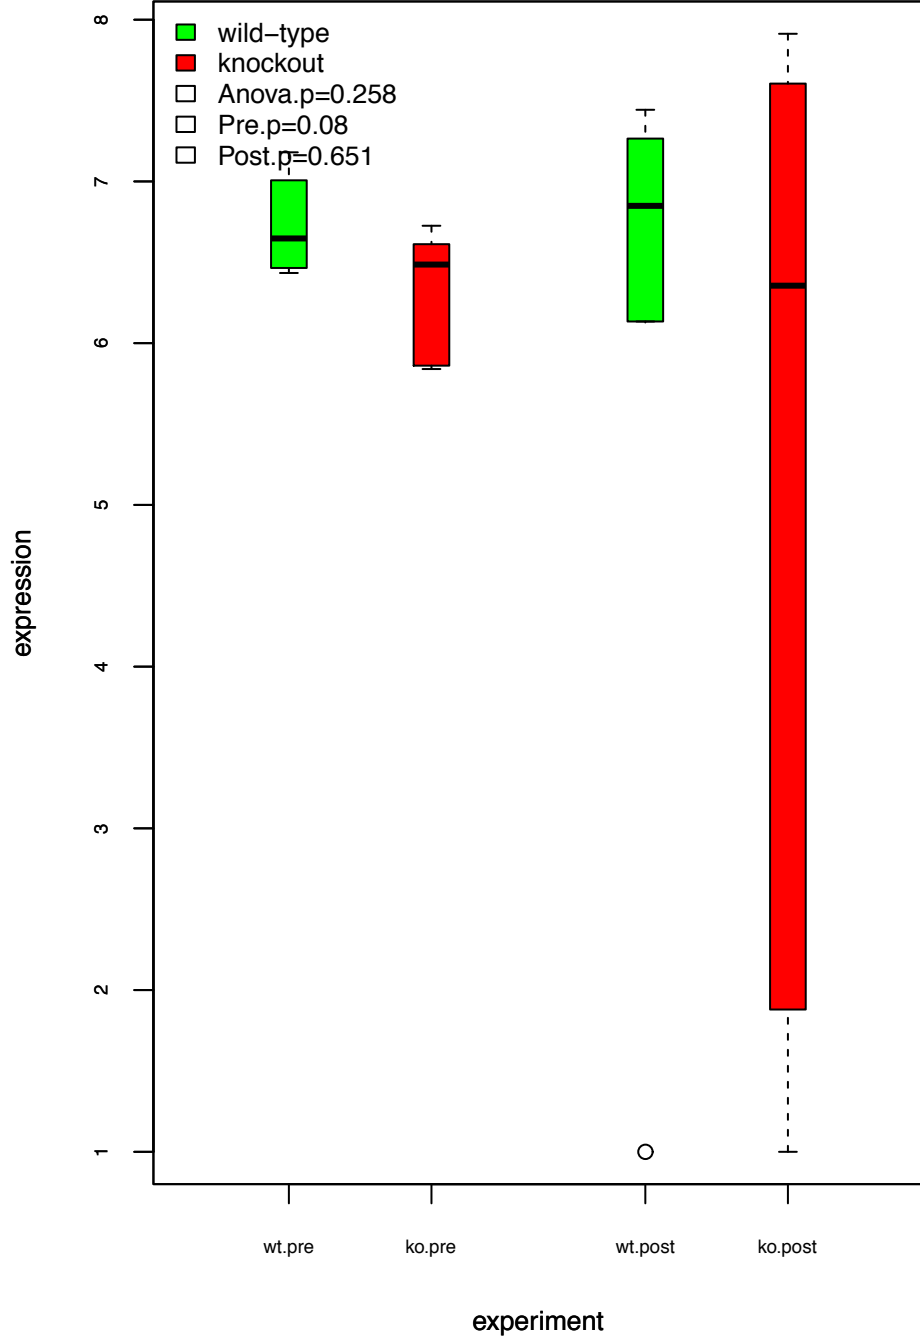

# Tnf

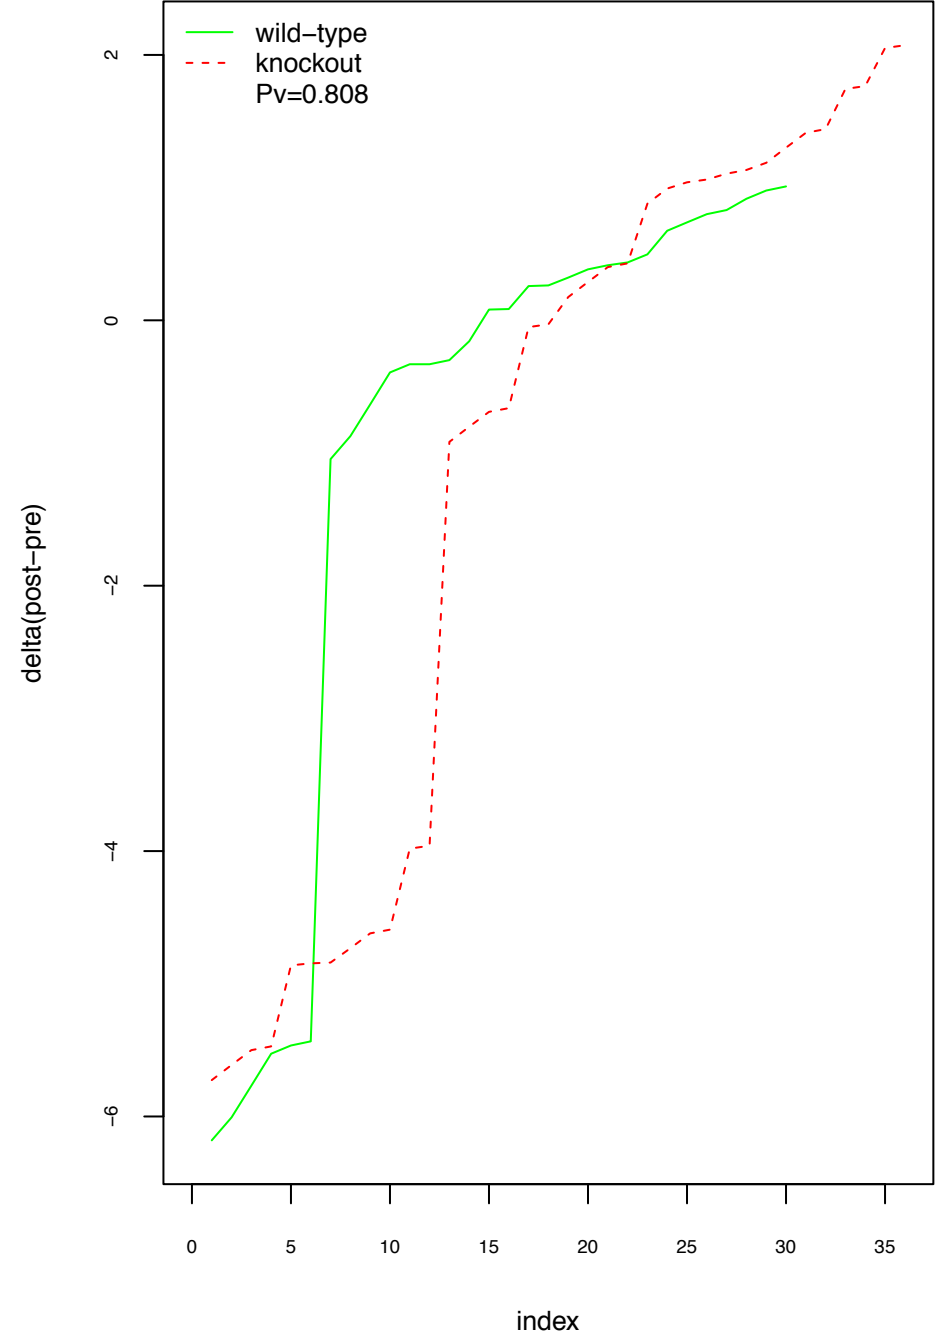

# Tnc

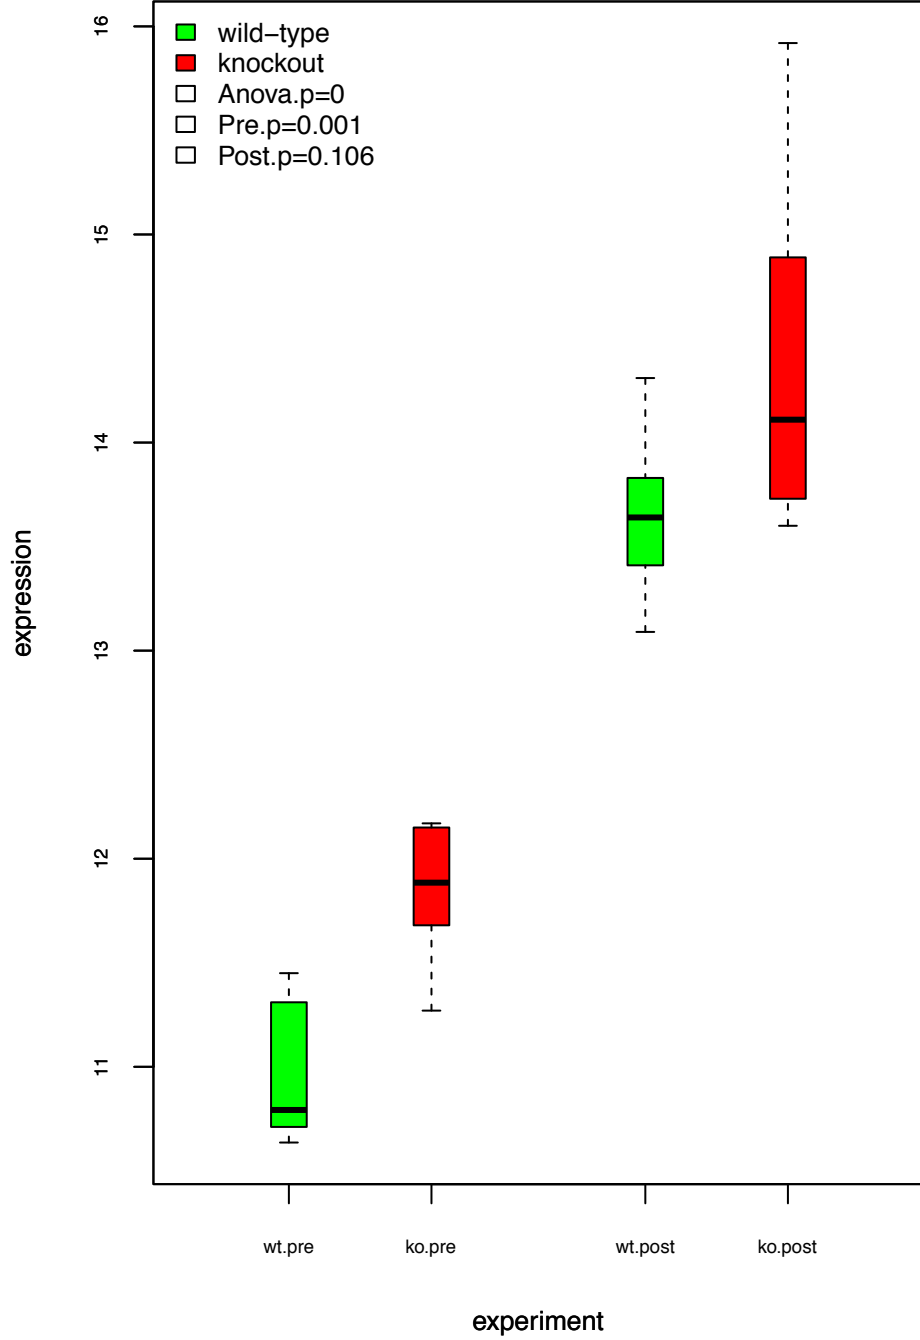

# Tnc

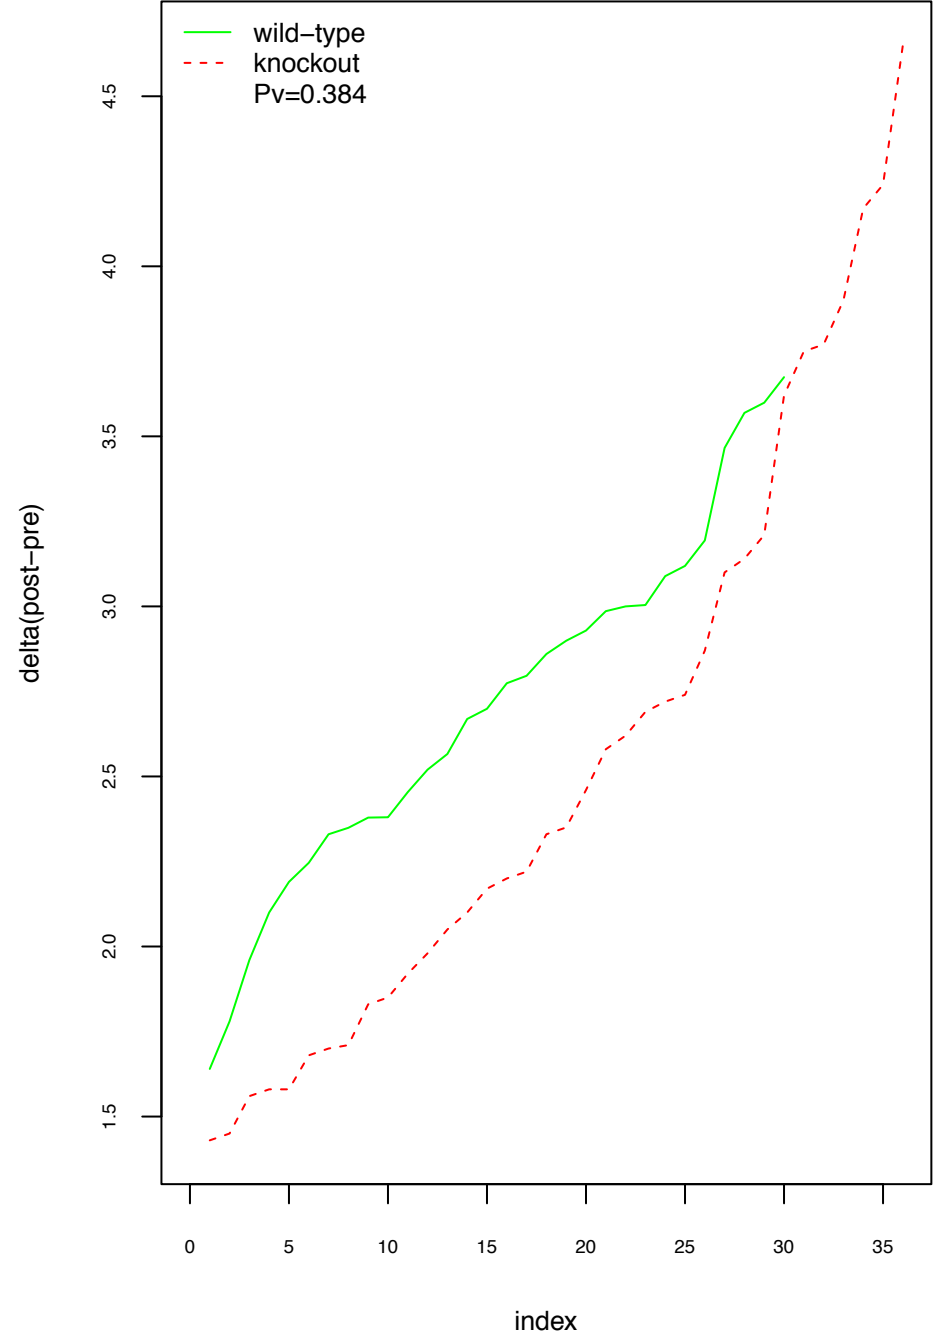

## Thbs2

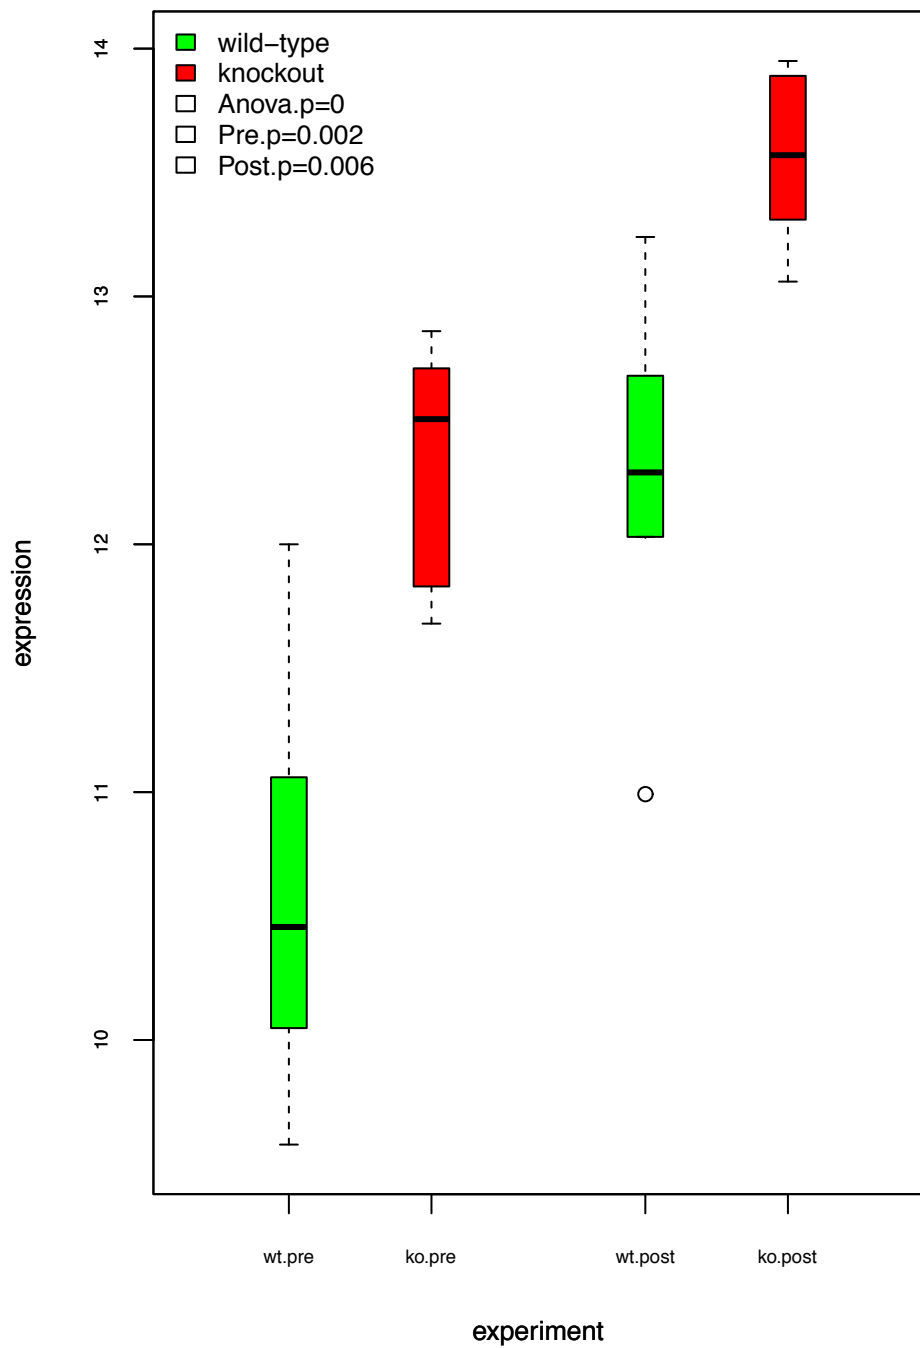

## Thbs2

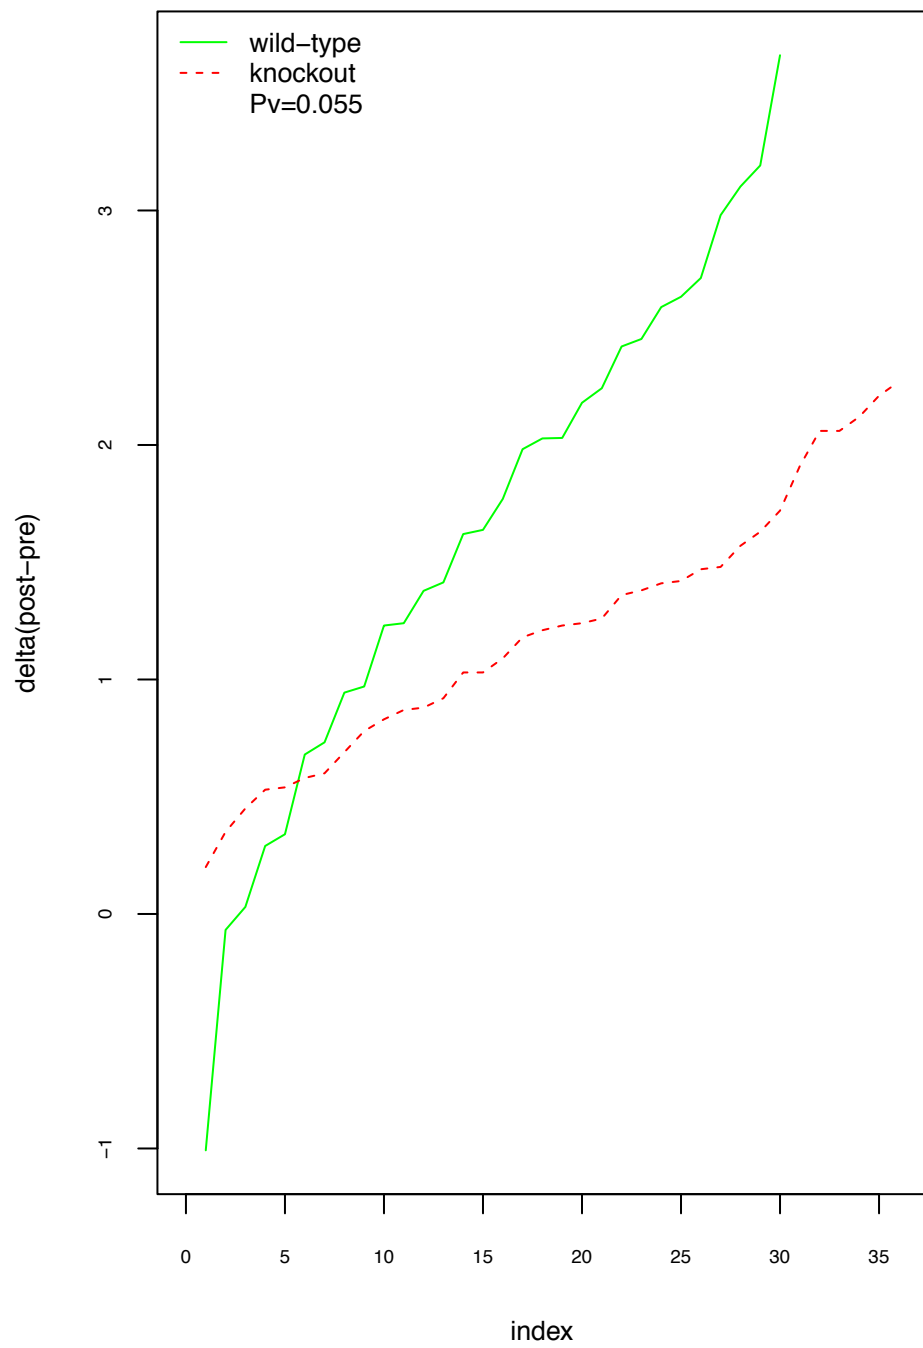

## Tgfbr2

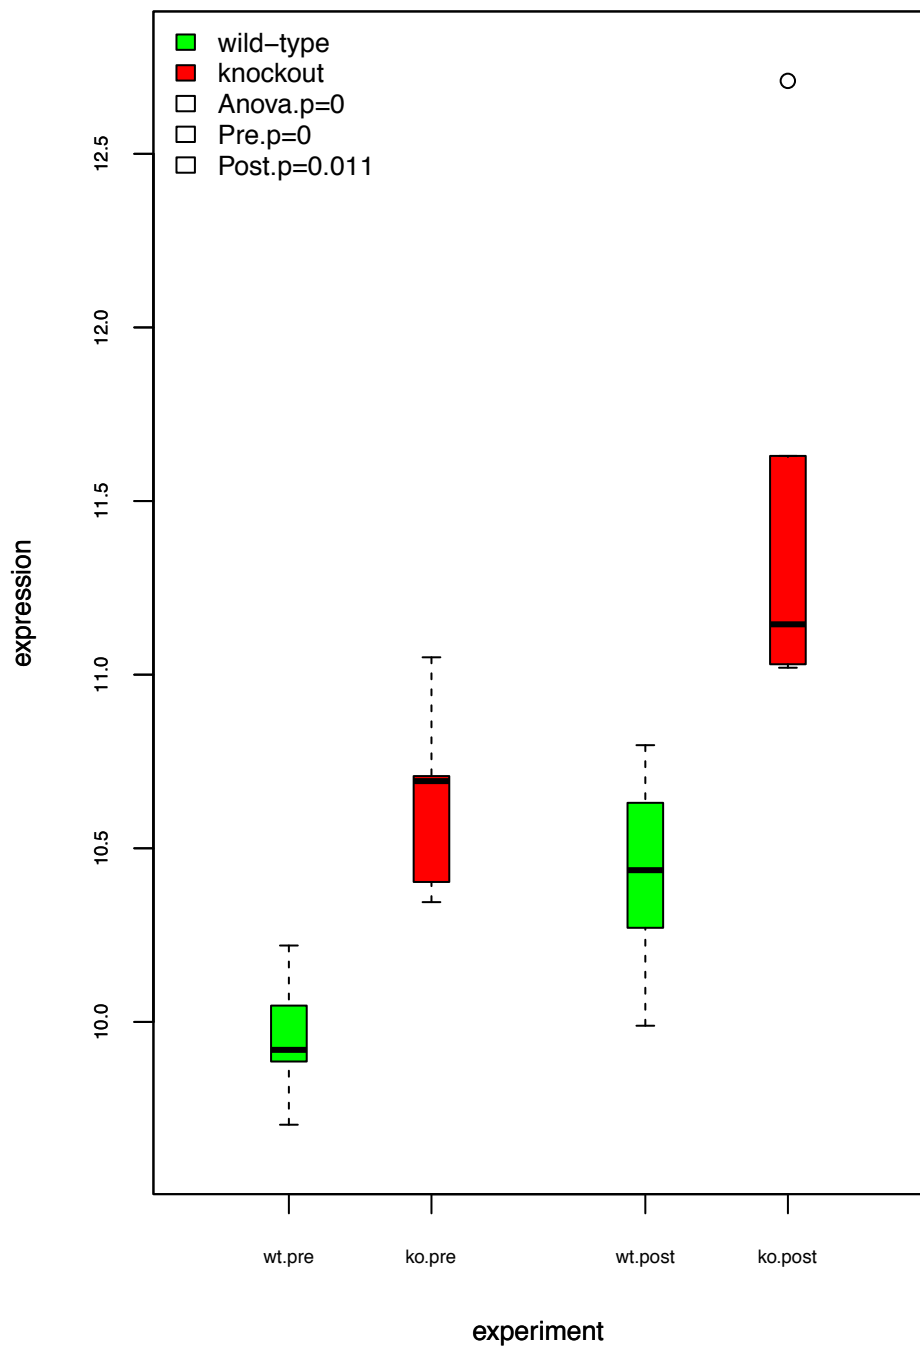

## Tgfbr2

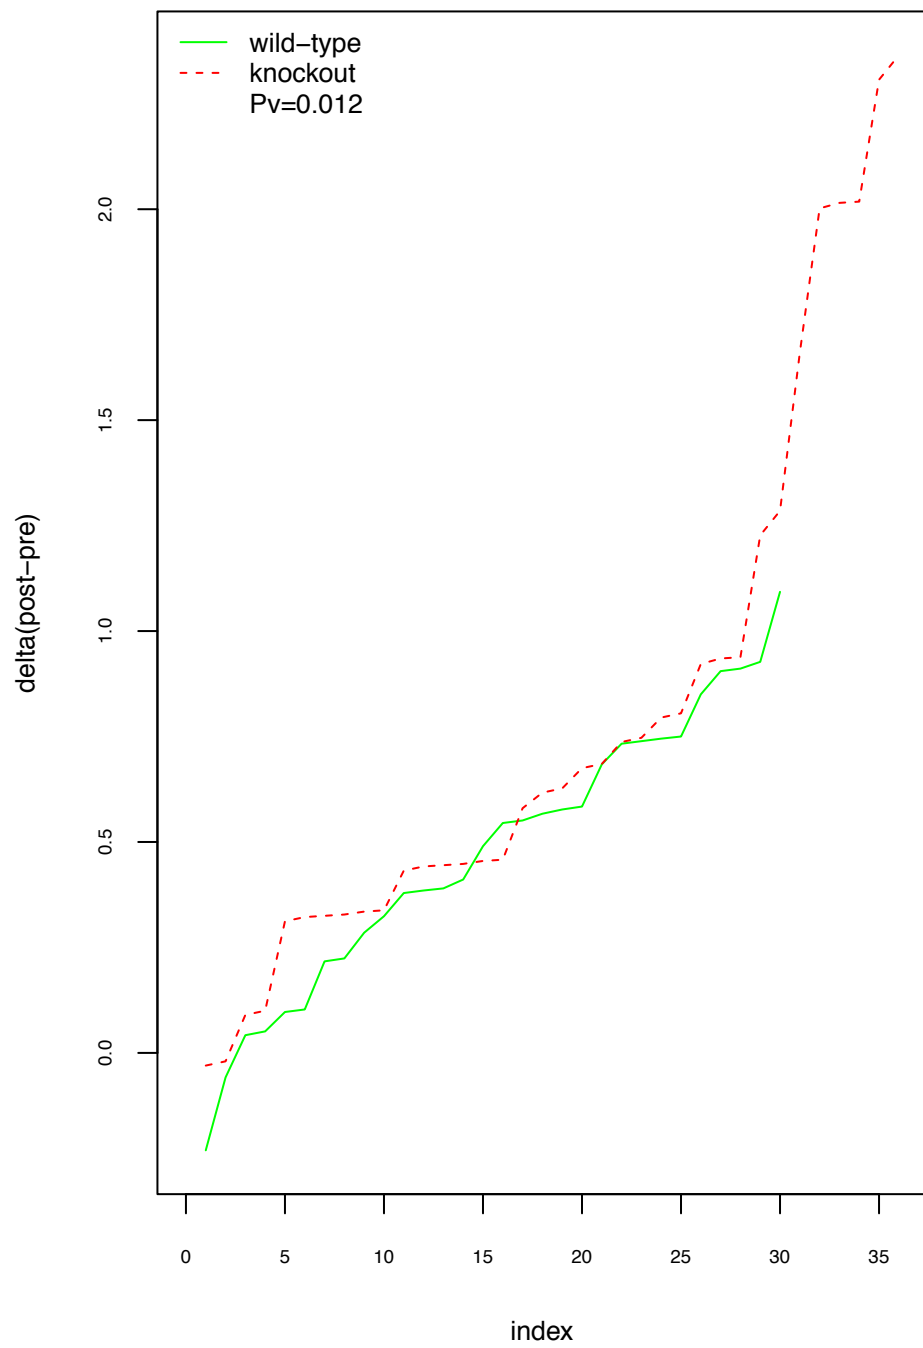

# Tgfb1

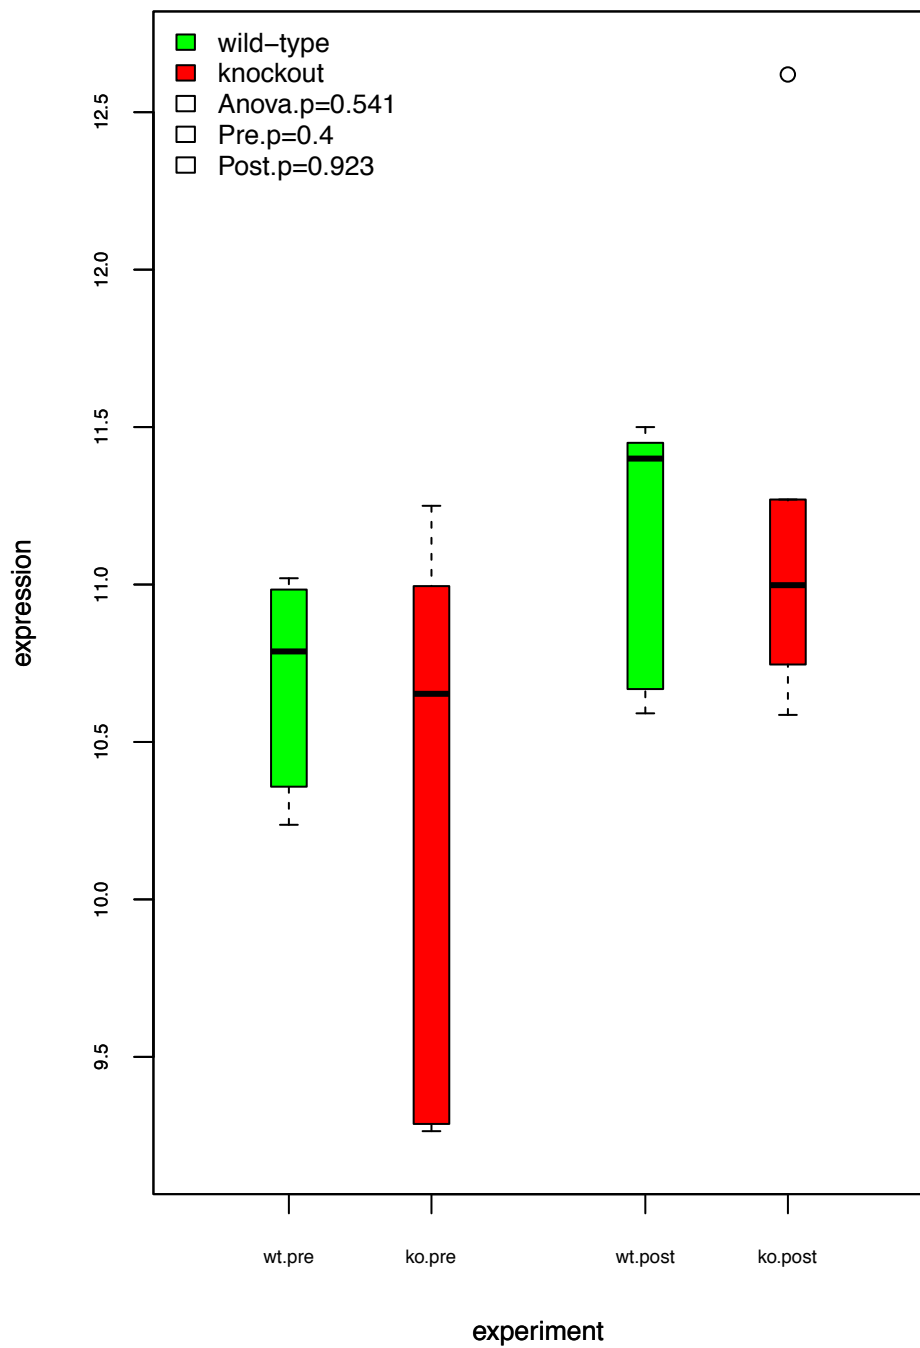

# Tgfb1

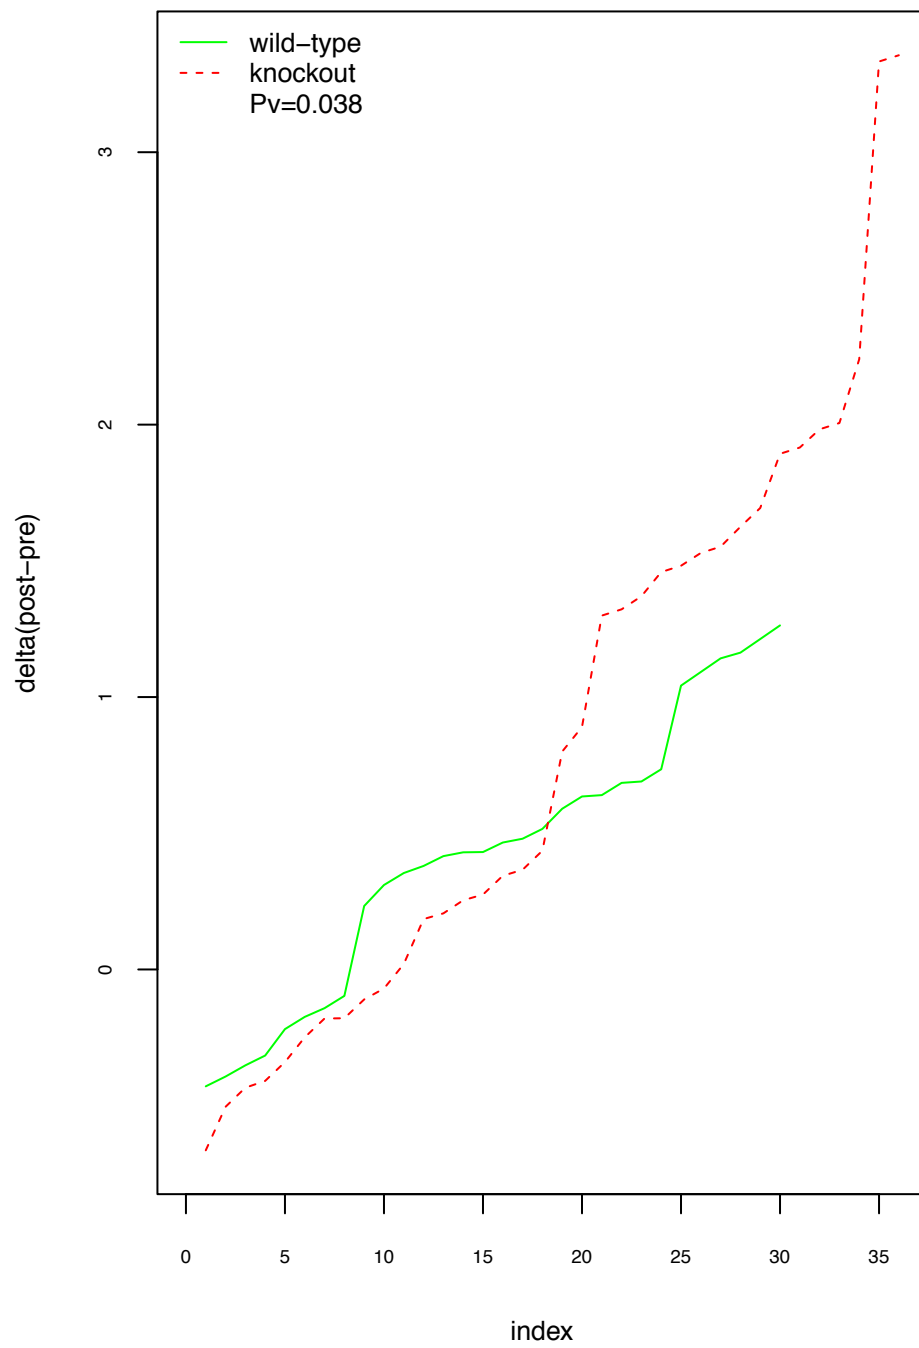

# Tek

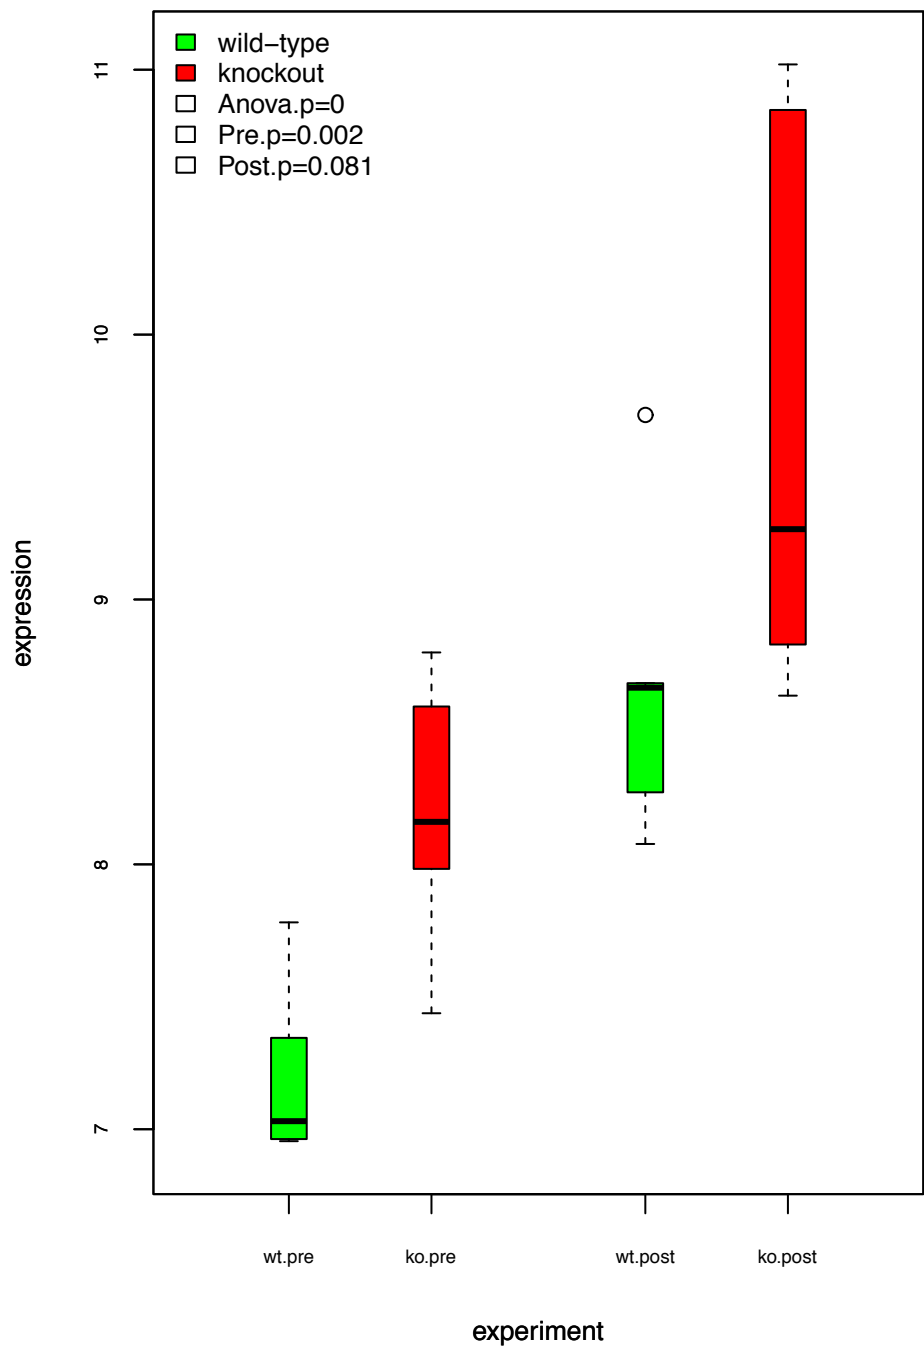

# Tek

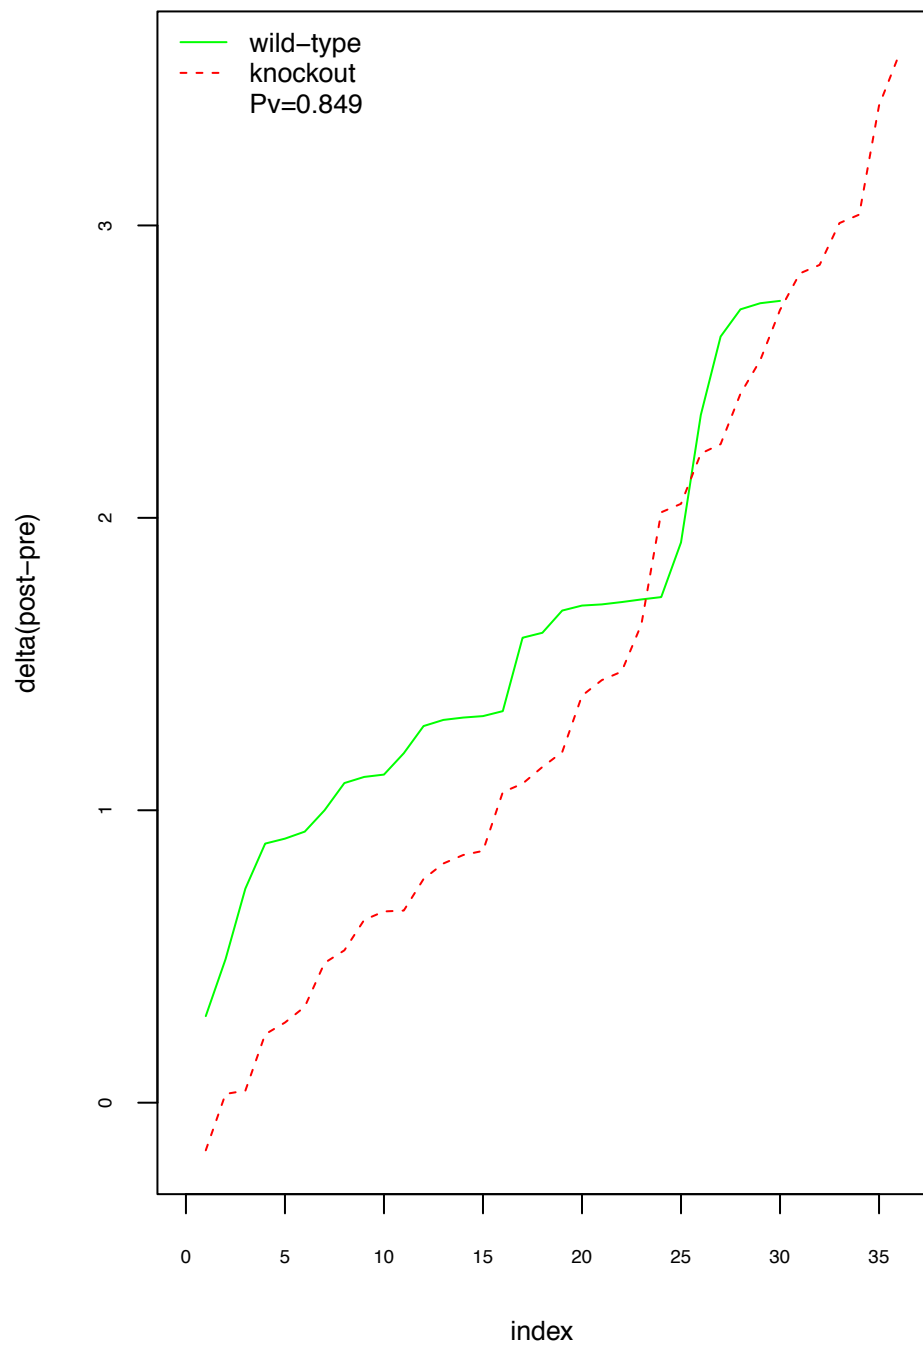

## Tbx5

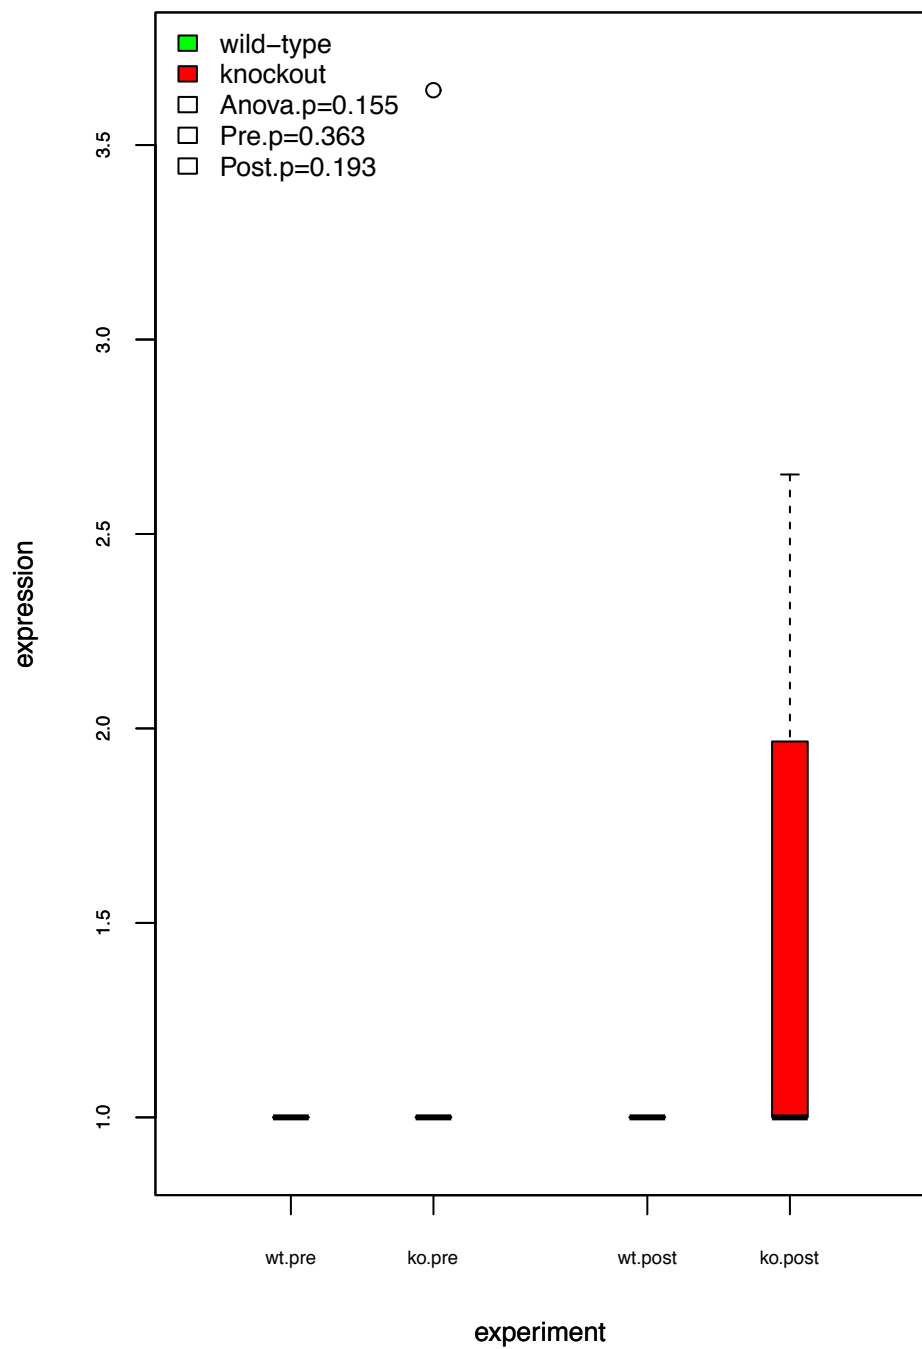

## Tbx5

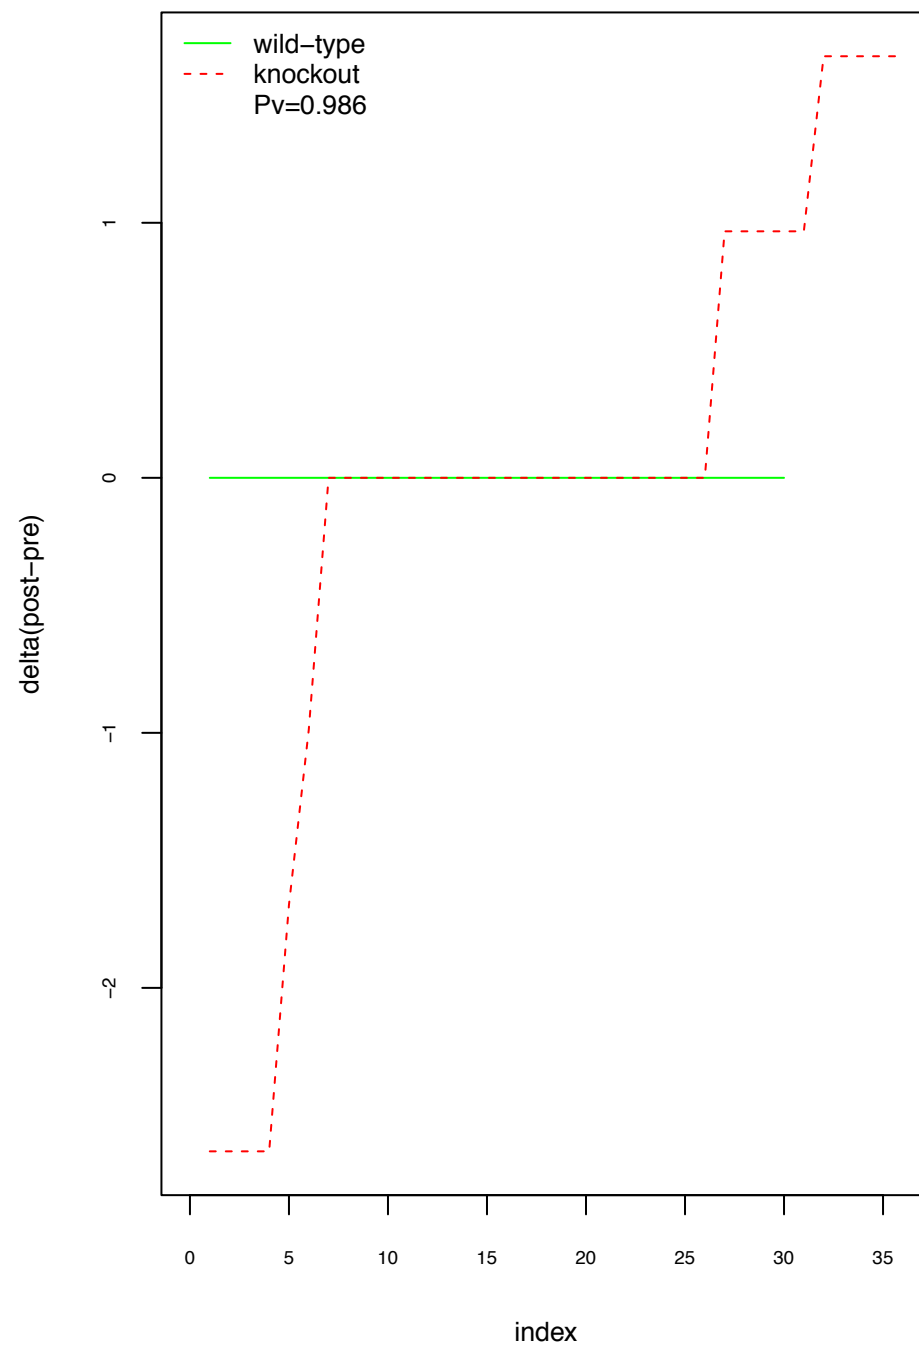



### Tbx4

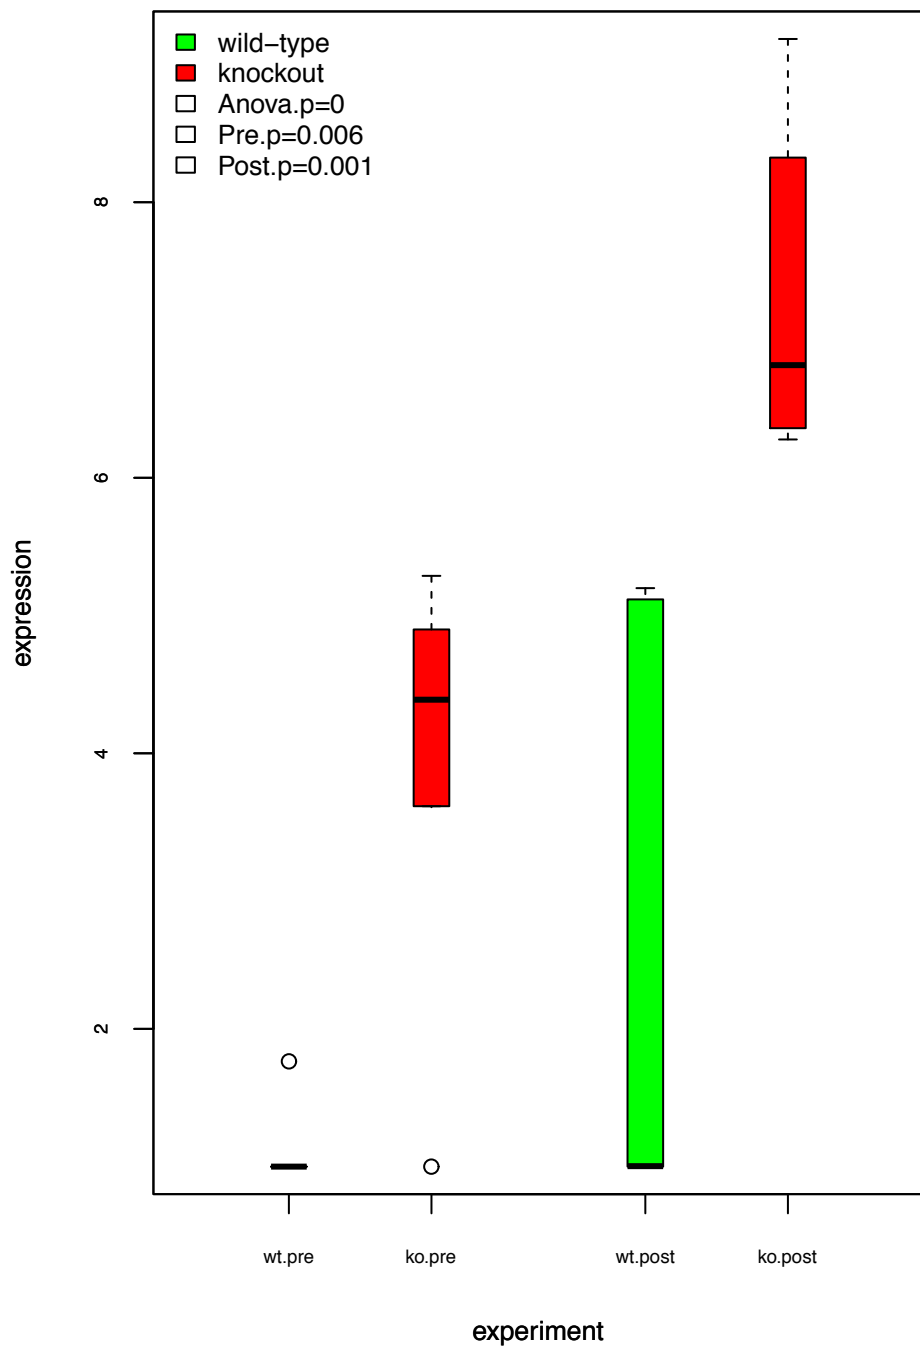

### Tbx4

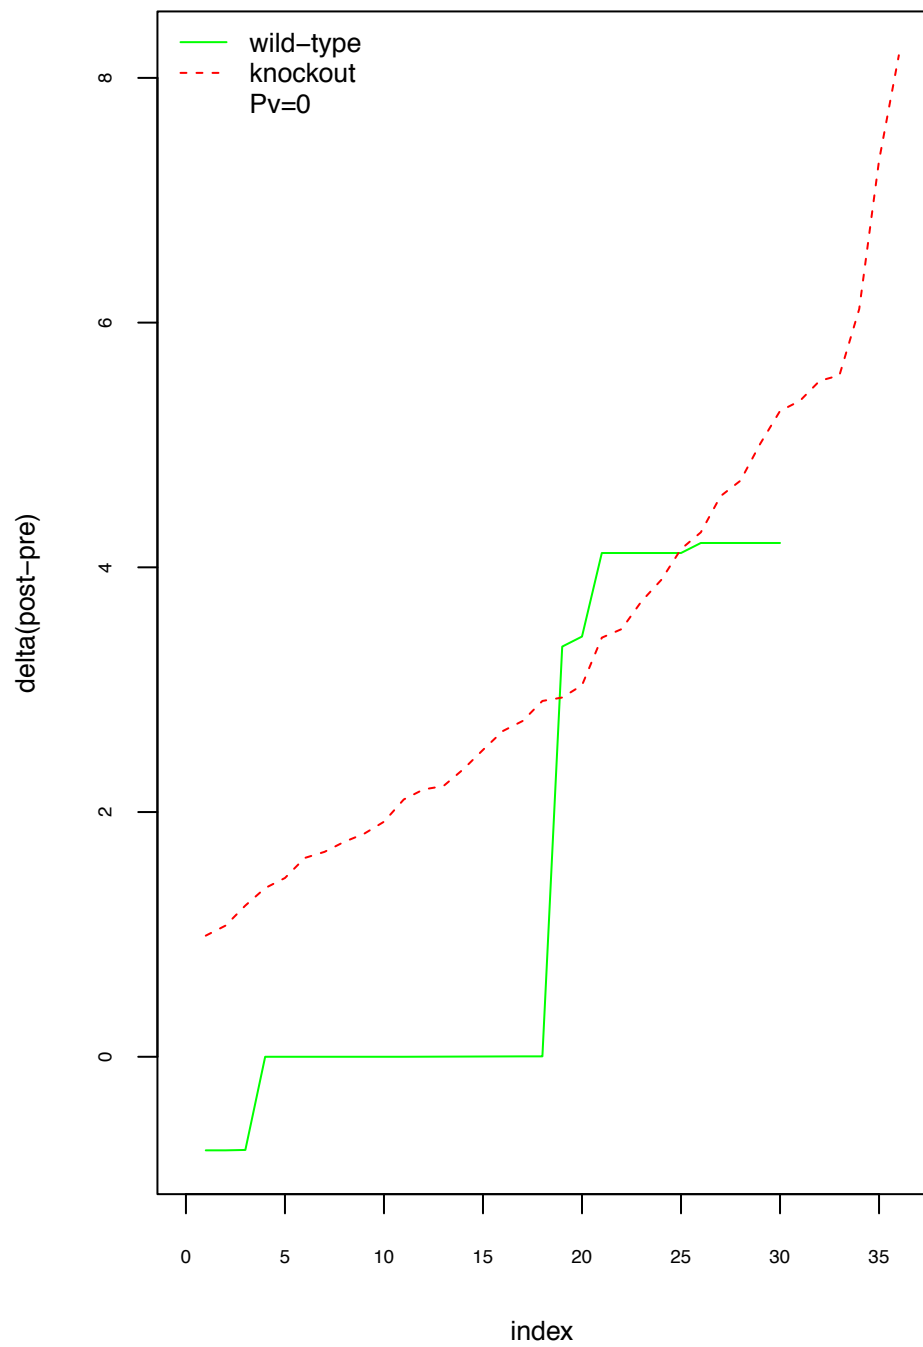

# TBP

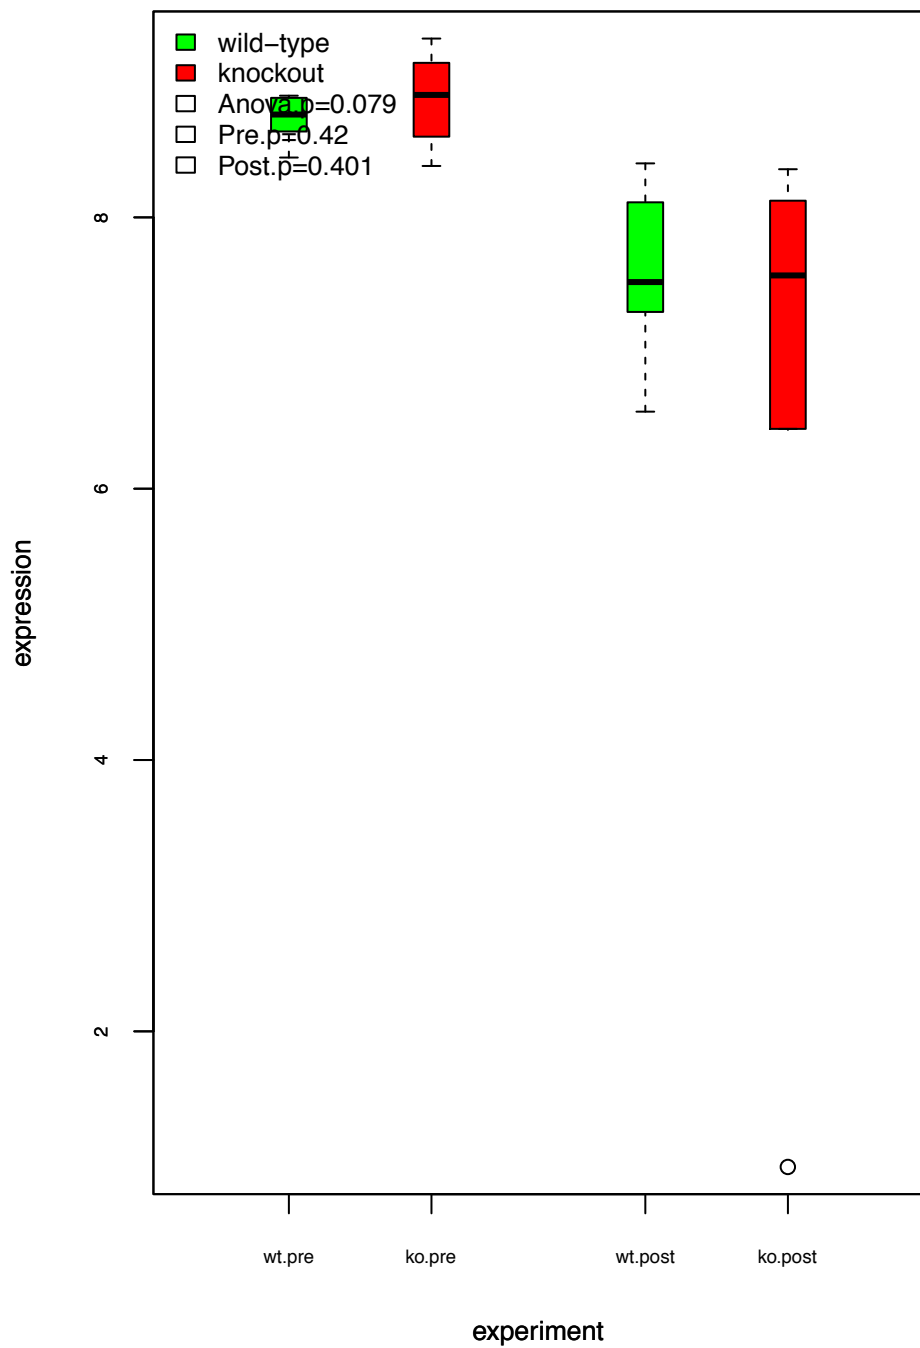

# TBP

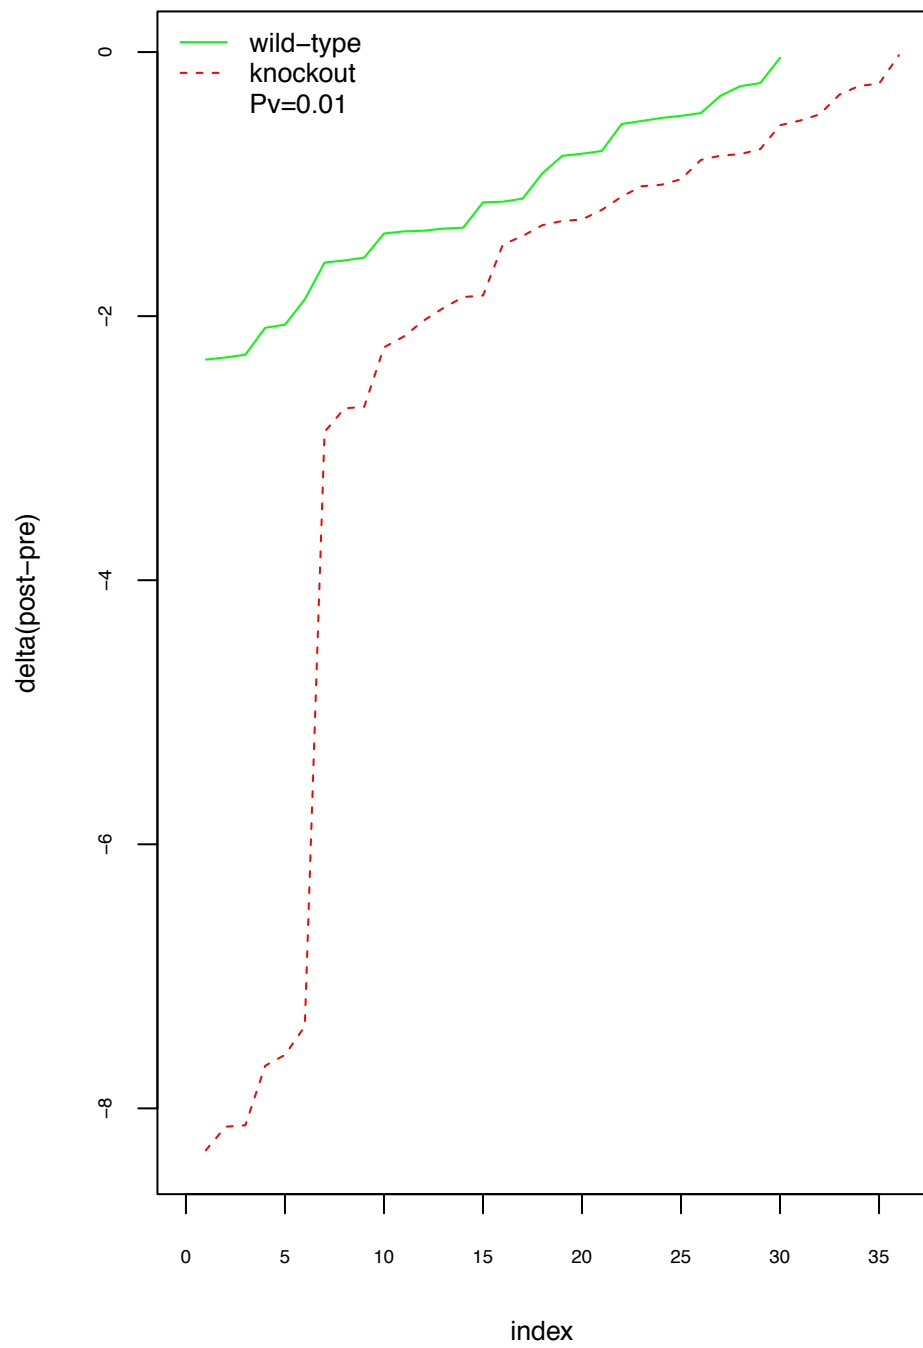

### vegfr-2

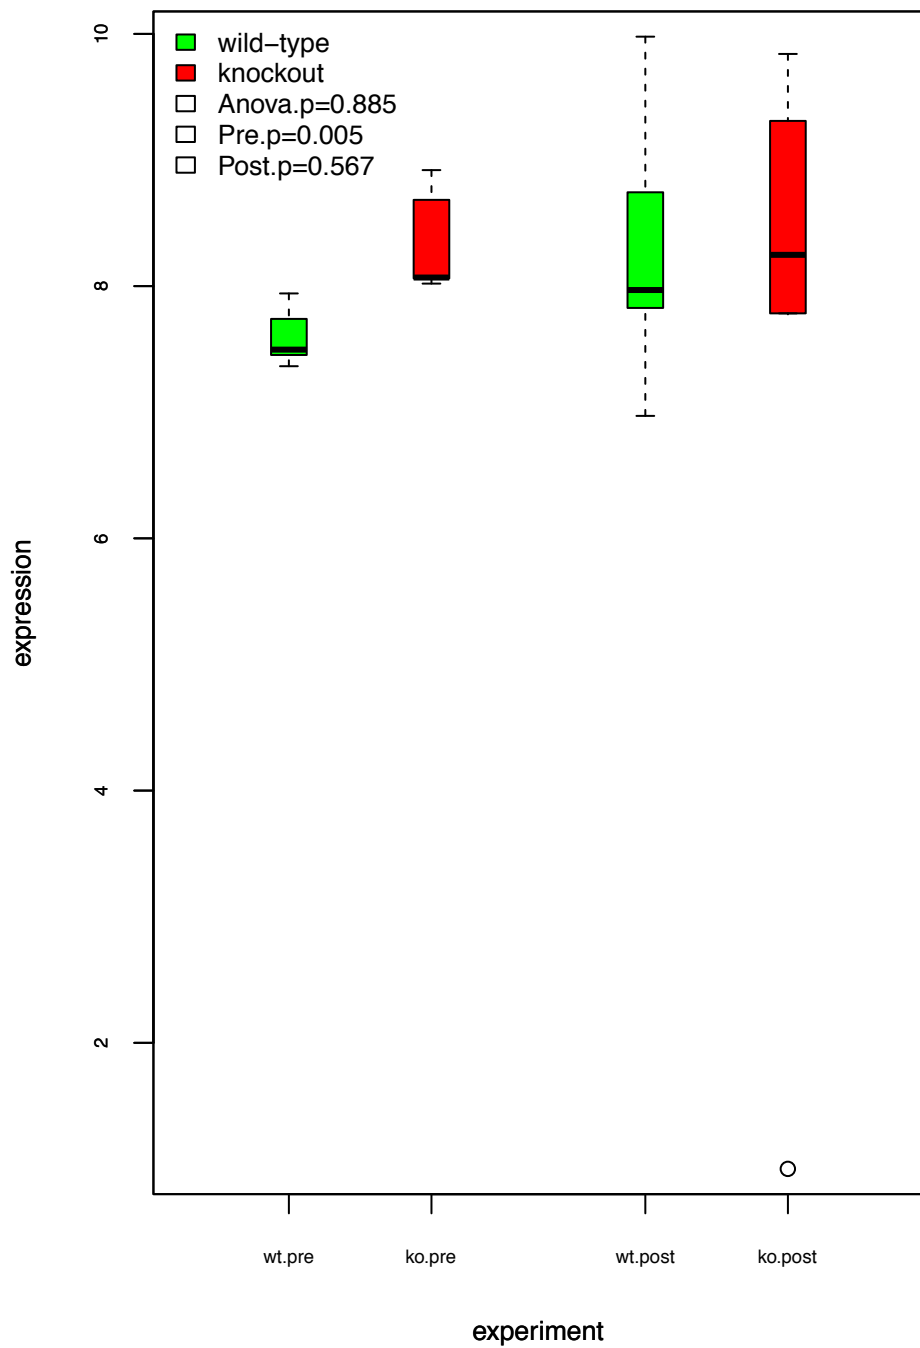

### vegfr-2

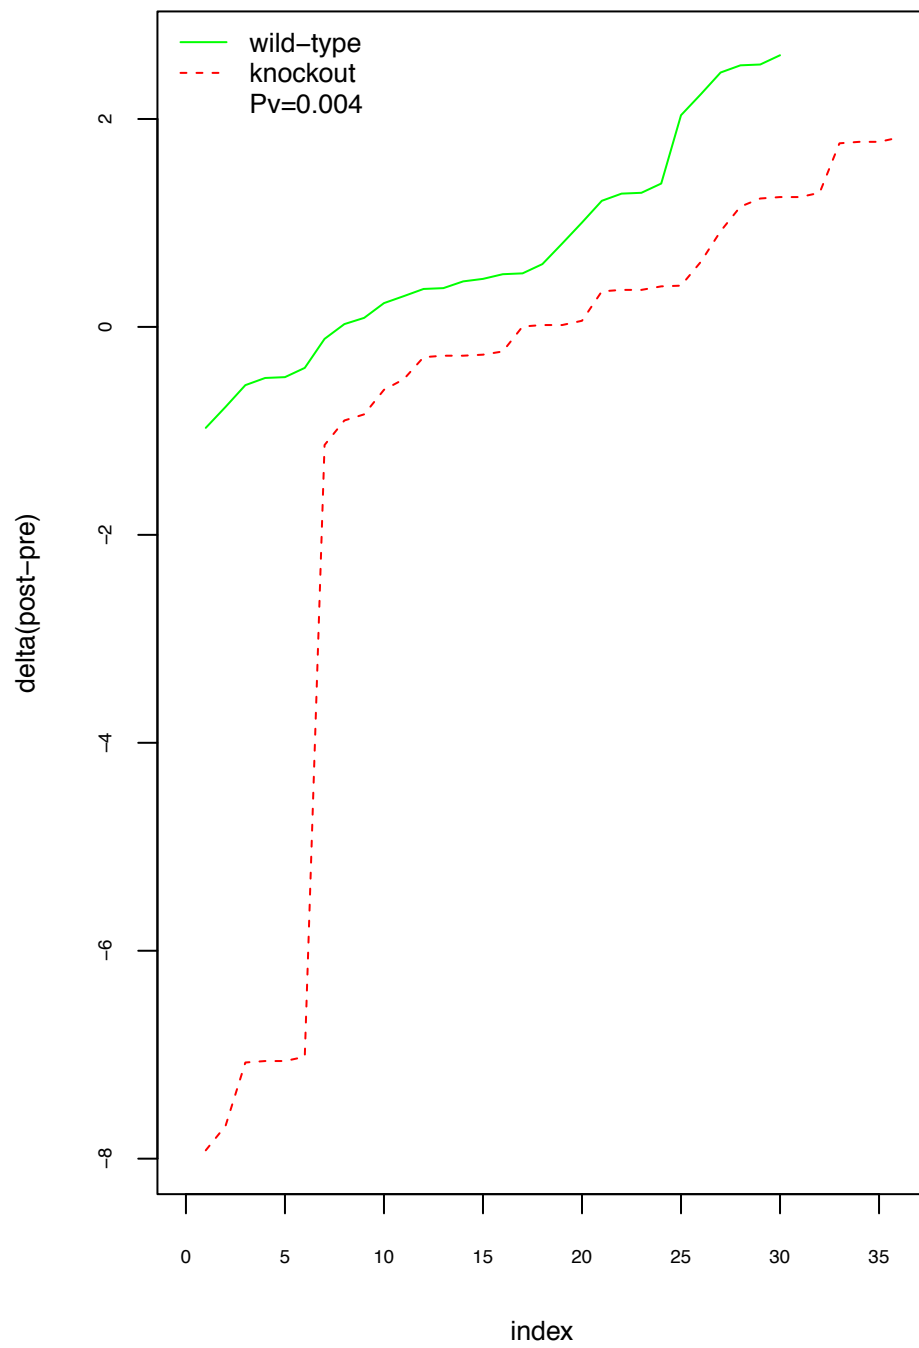

### Vegfb

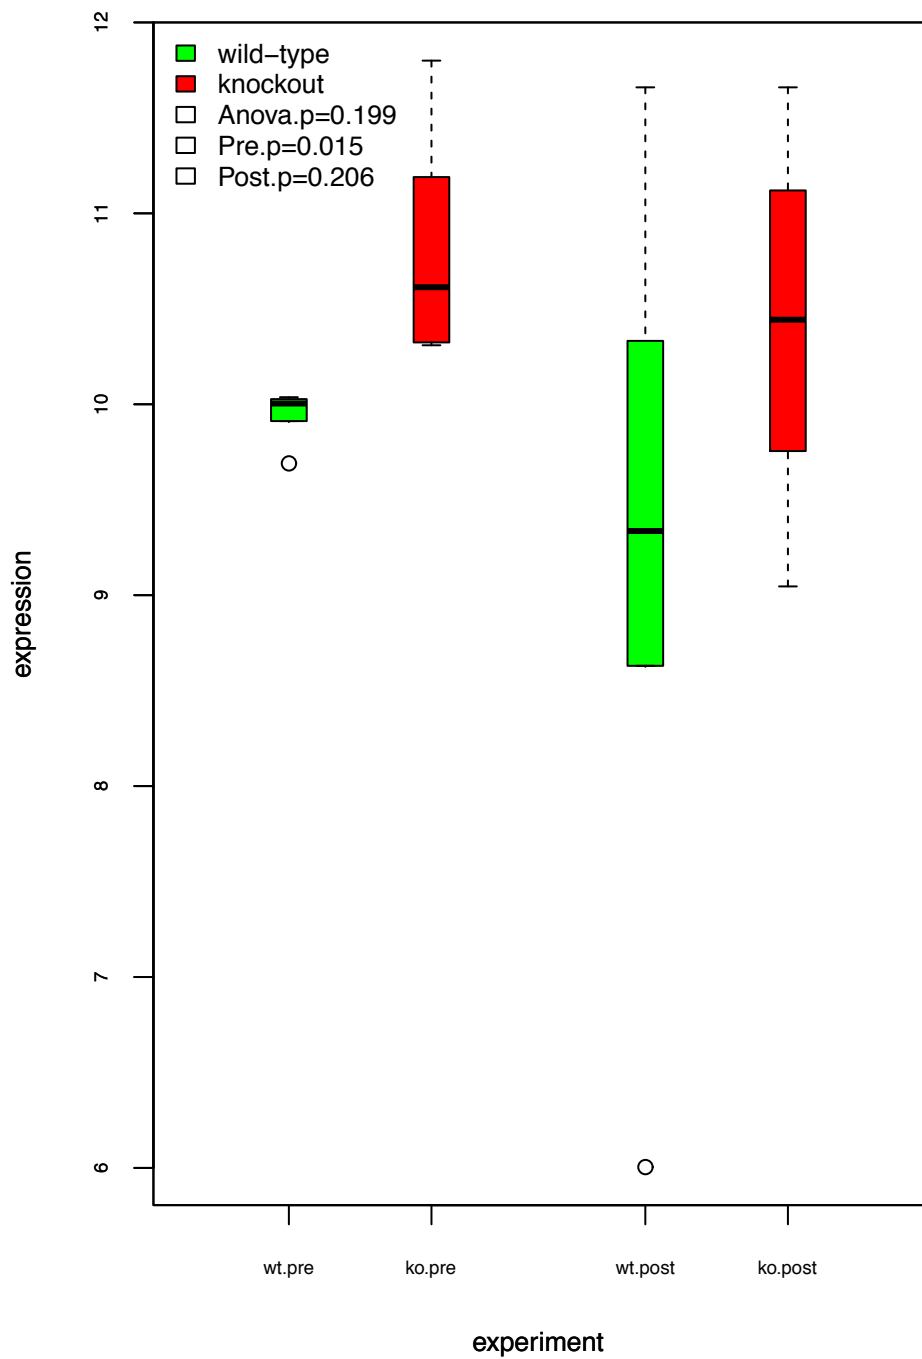

### Vegfb

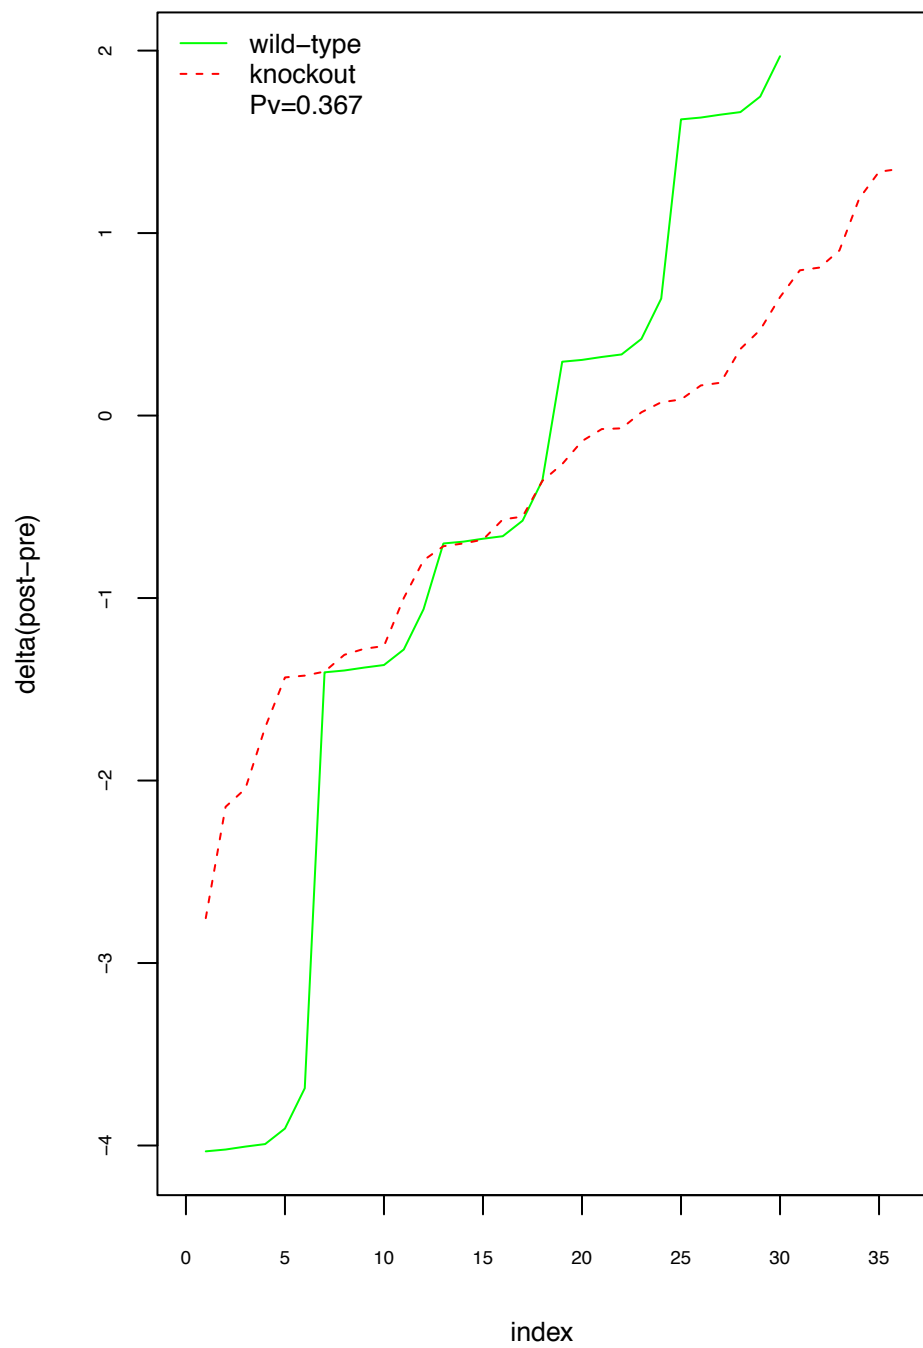

### Vegfa

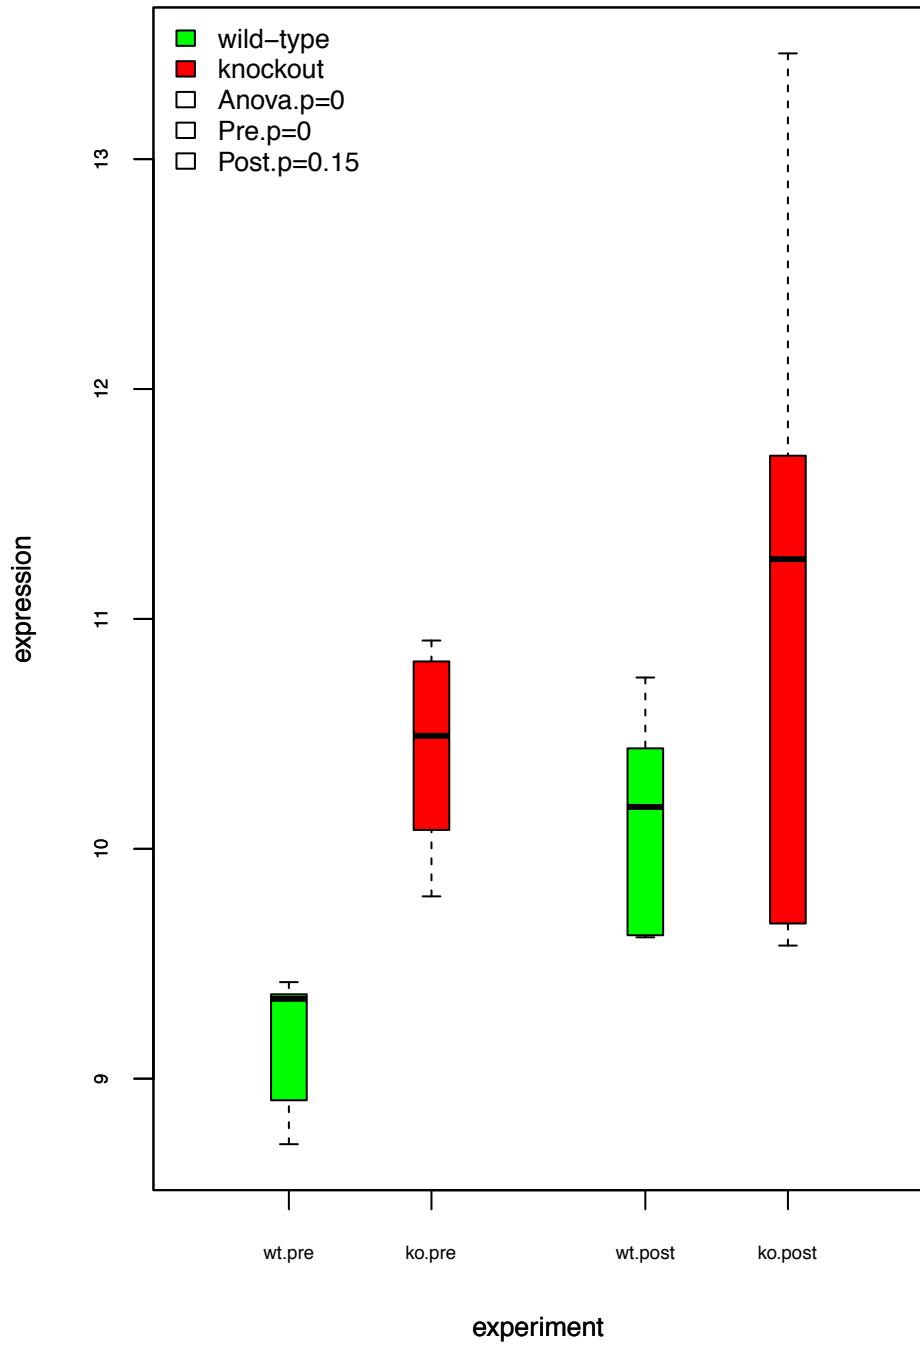

### Vegfa

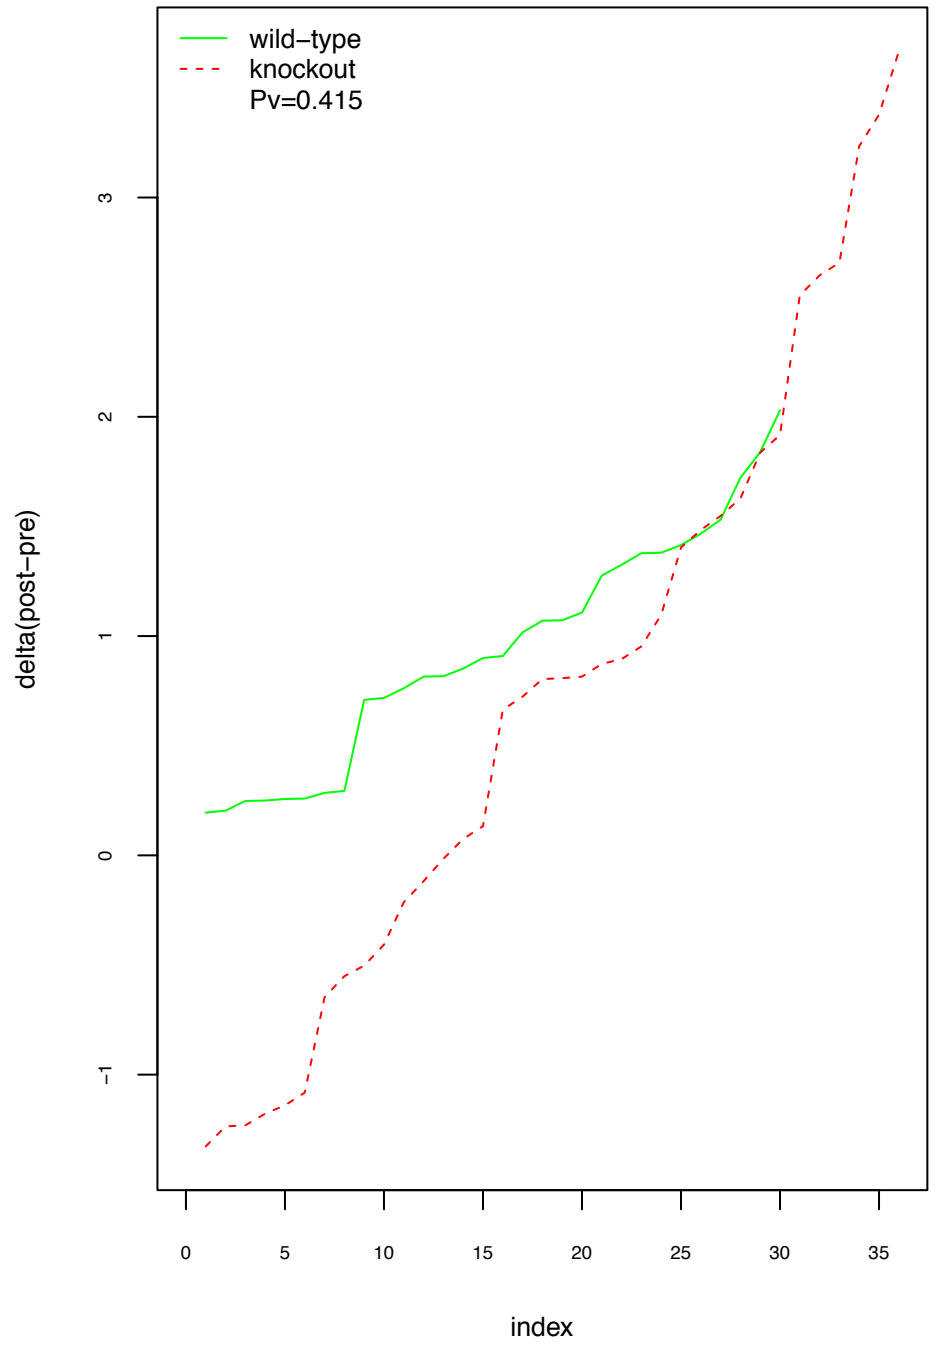

### Wsb1

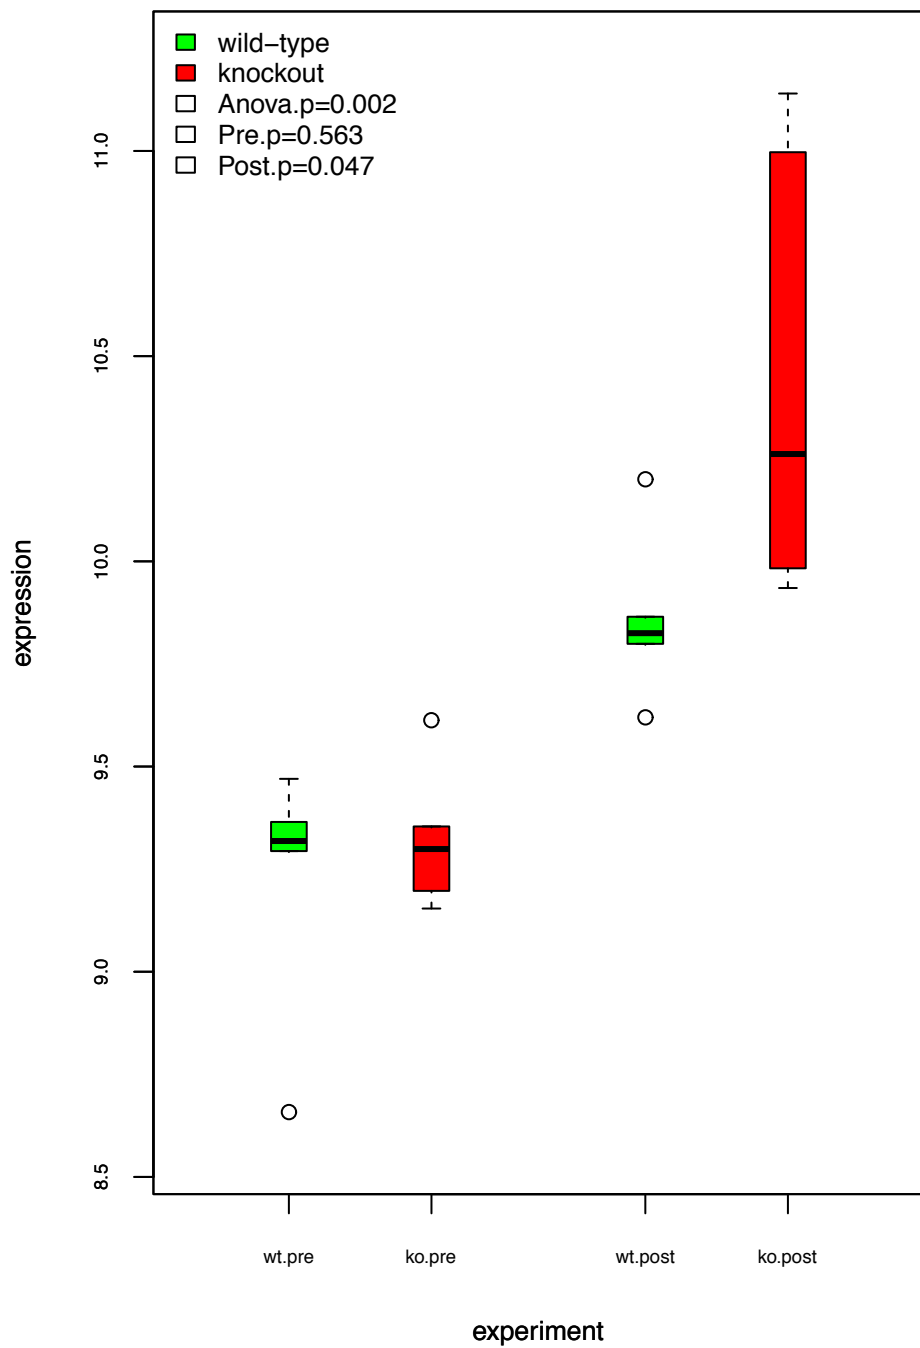

### Wsb1

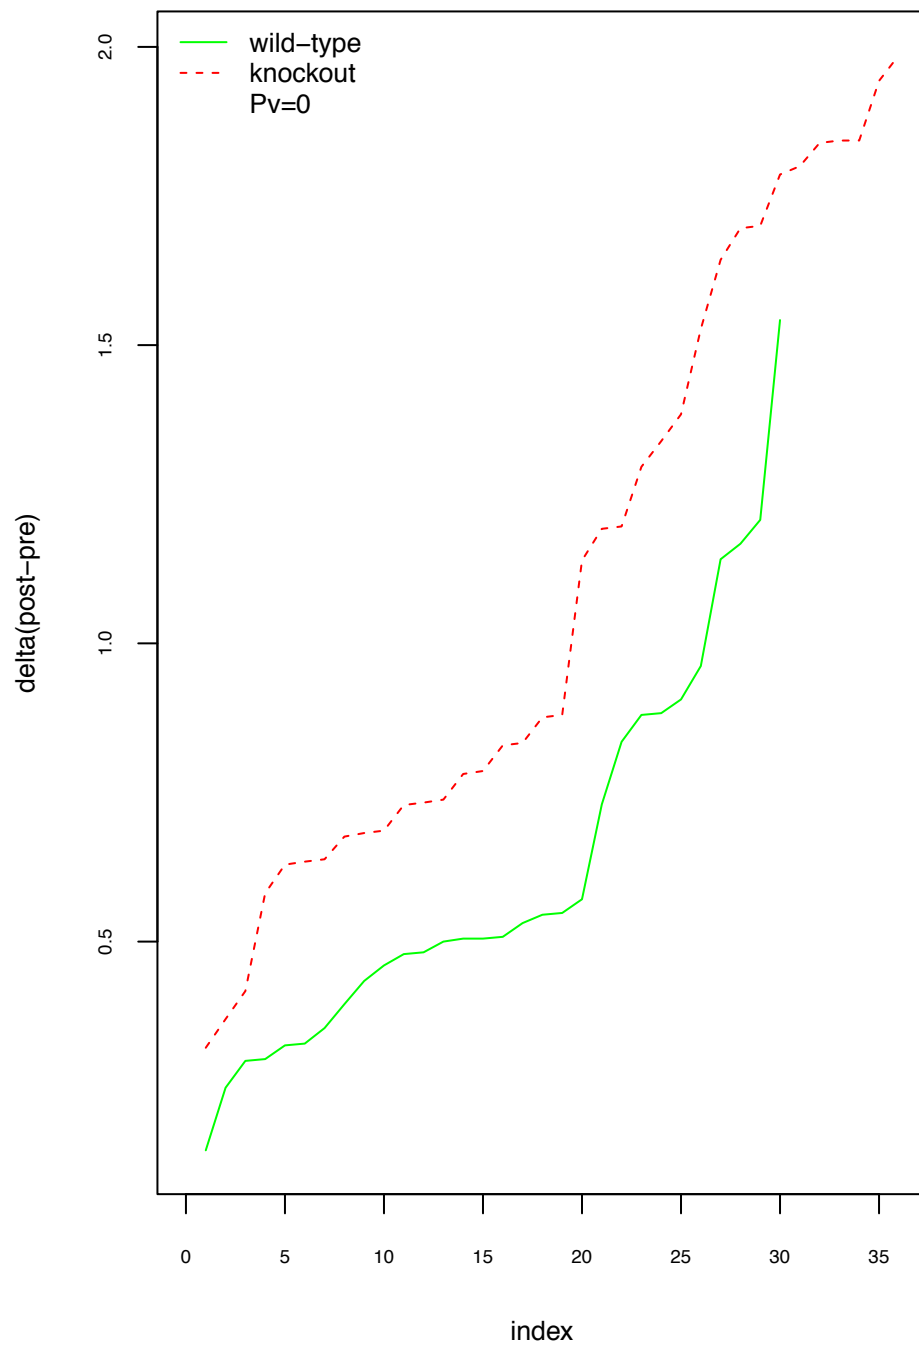

# Wnt10b

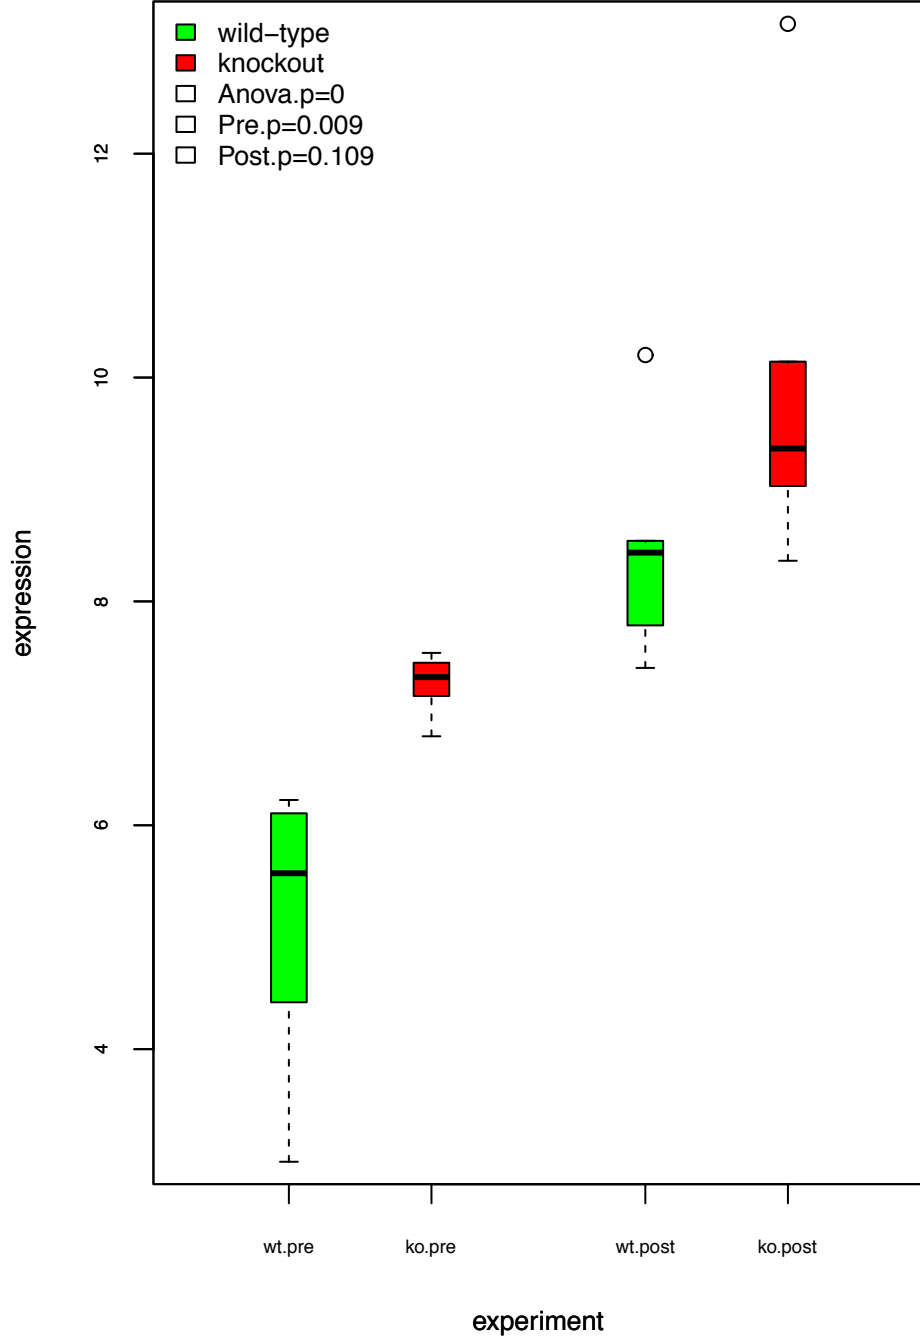

# Wnt10b

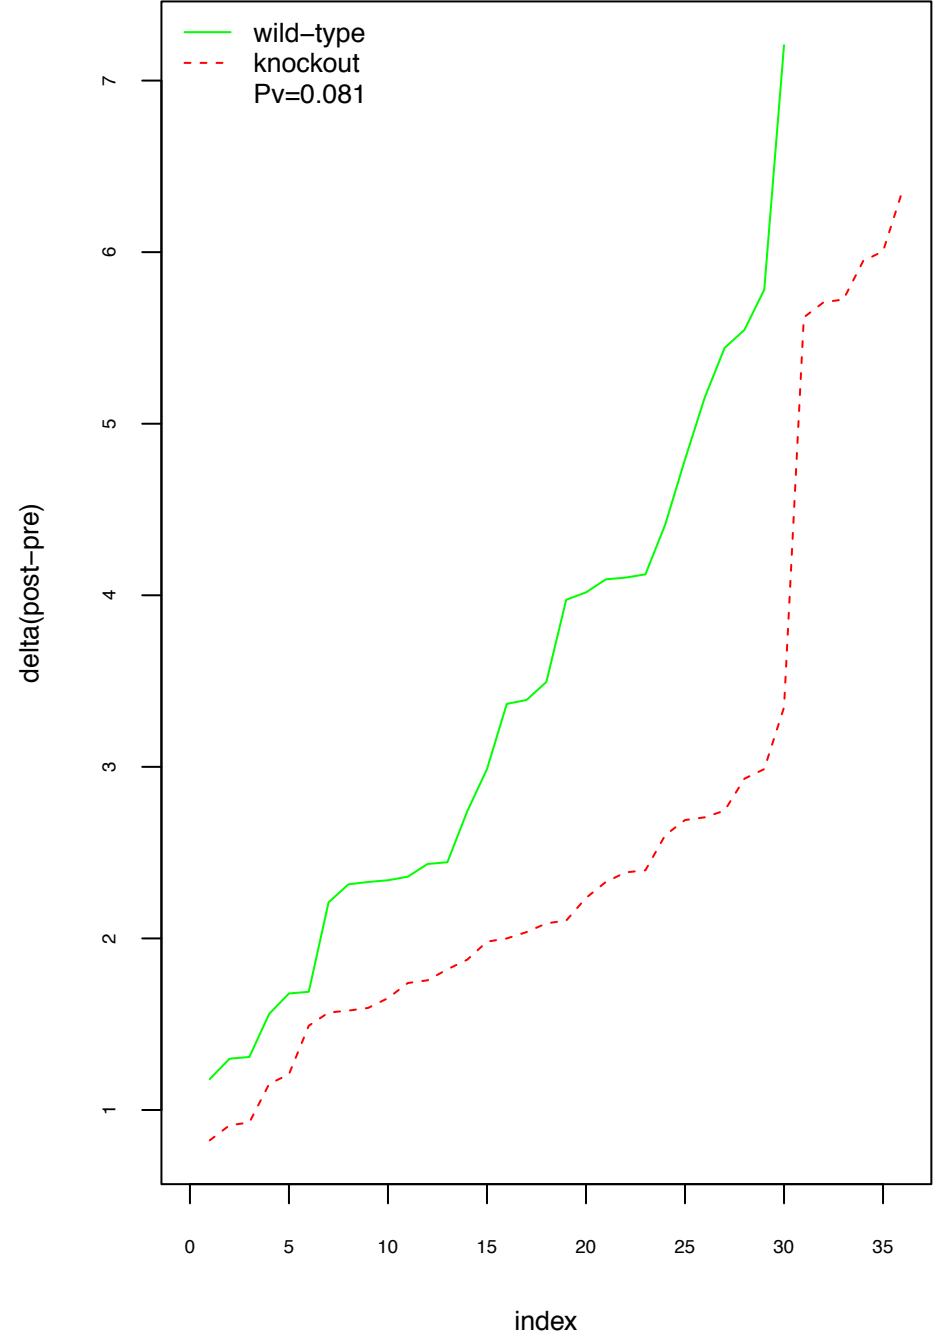

### Wnt9a

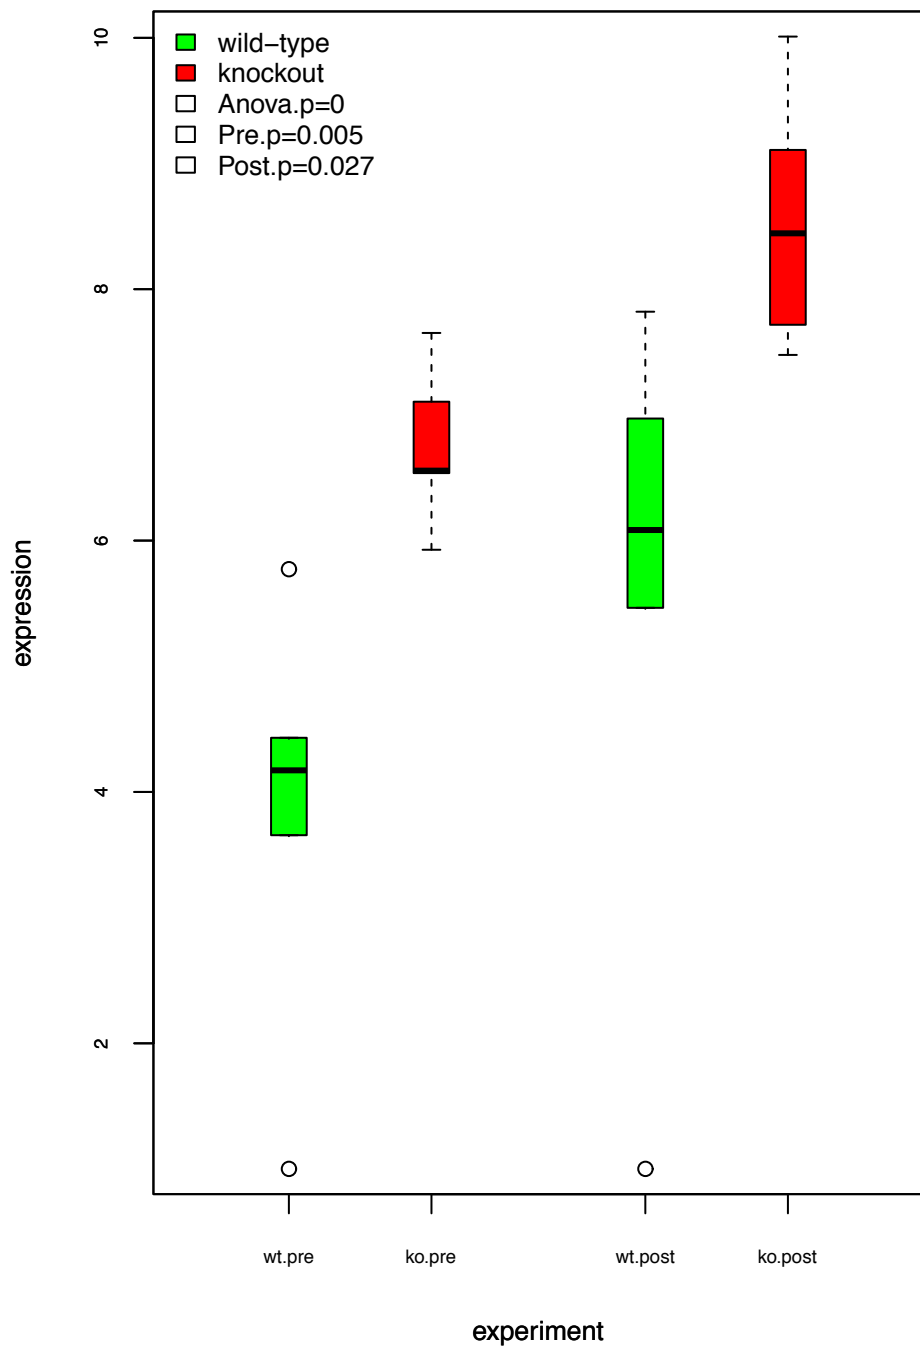

### Wnt9a

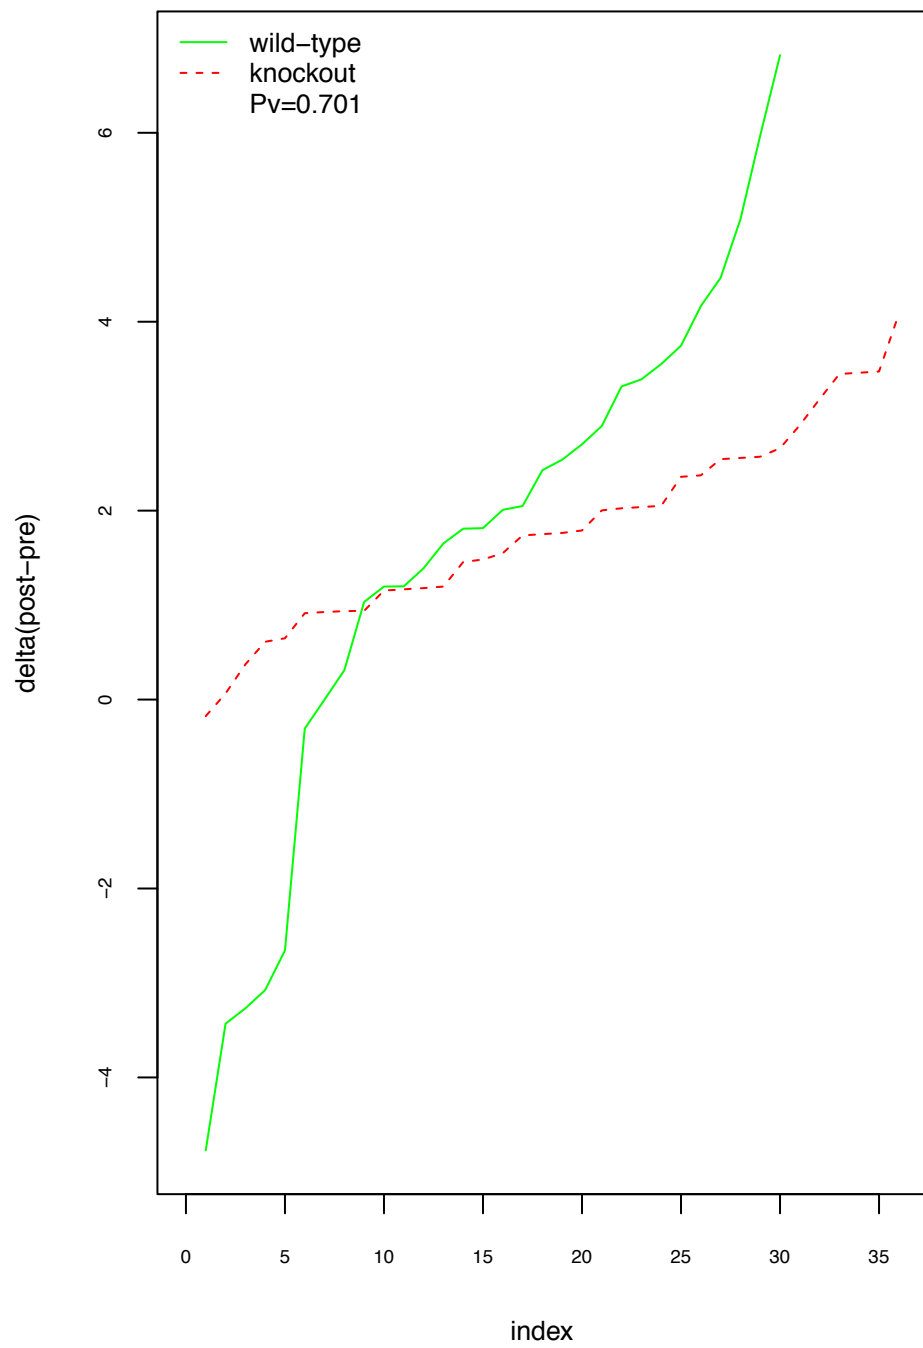



### Wnt7b

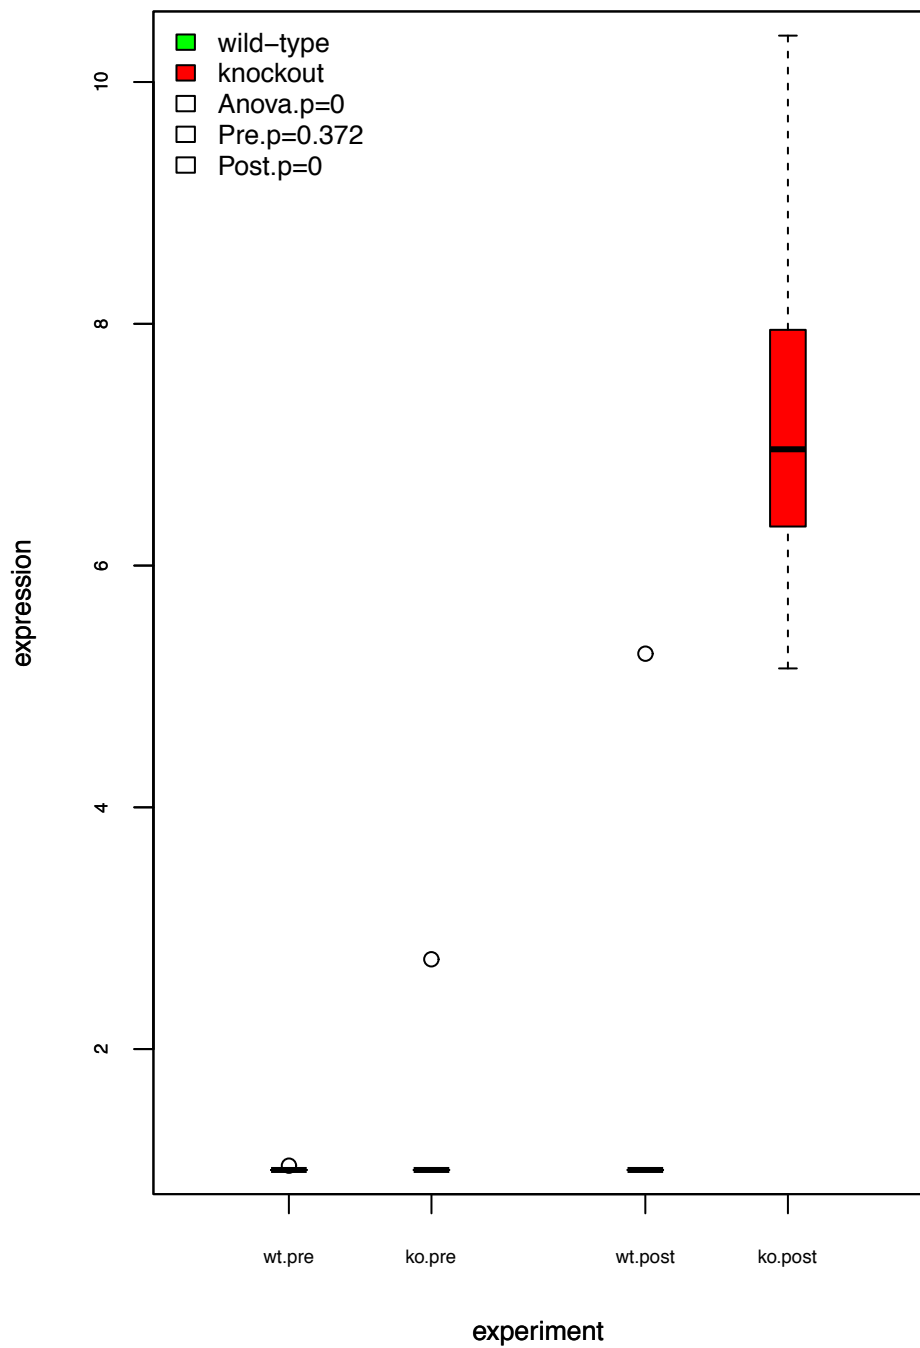

### Wnt7b

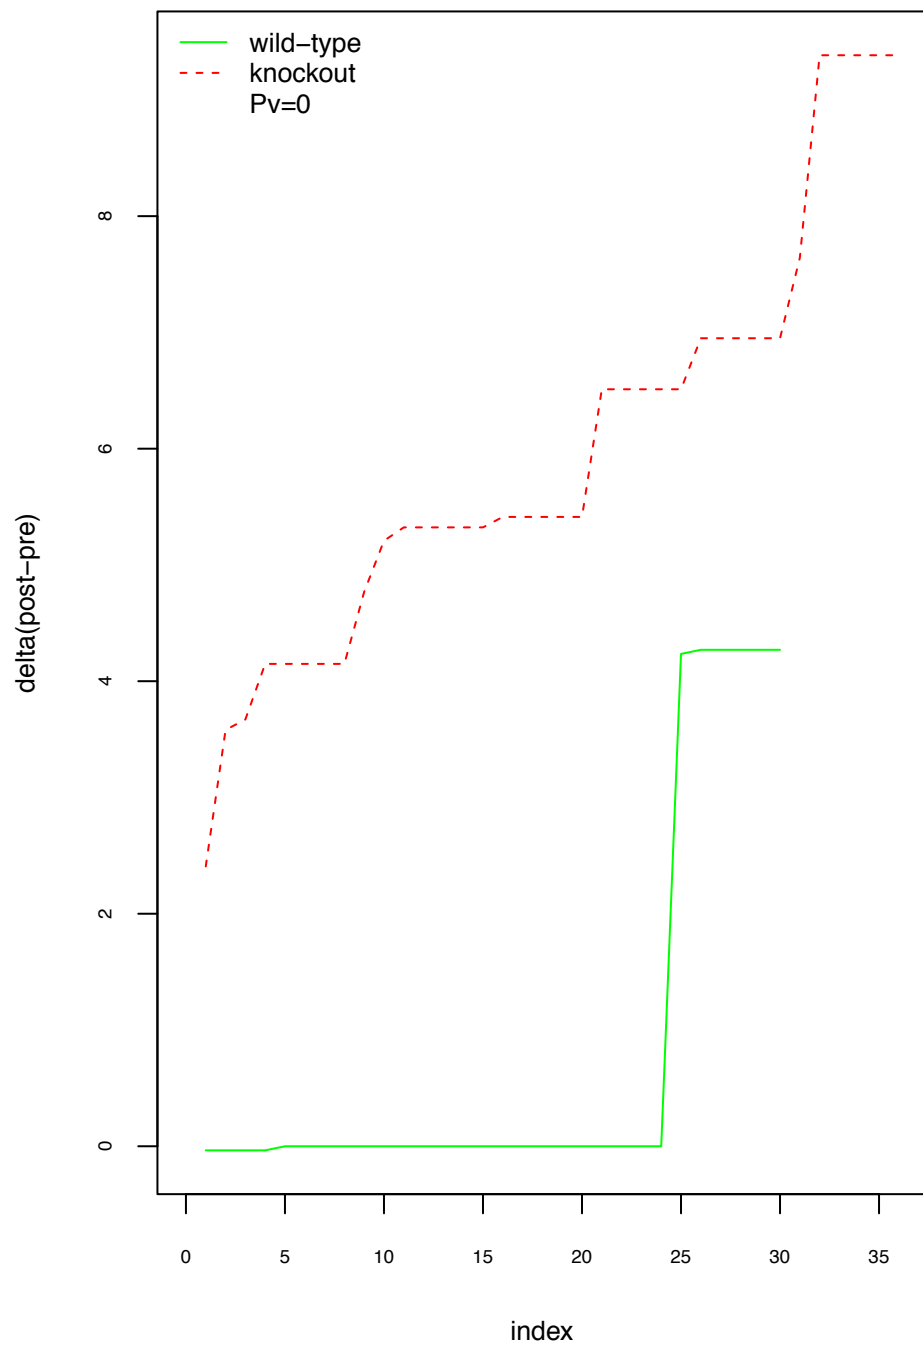

### Wnt5a

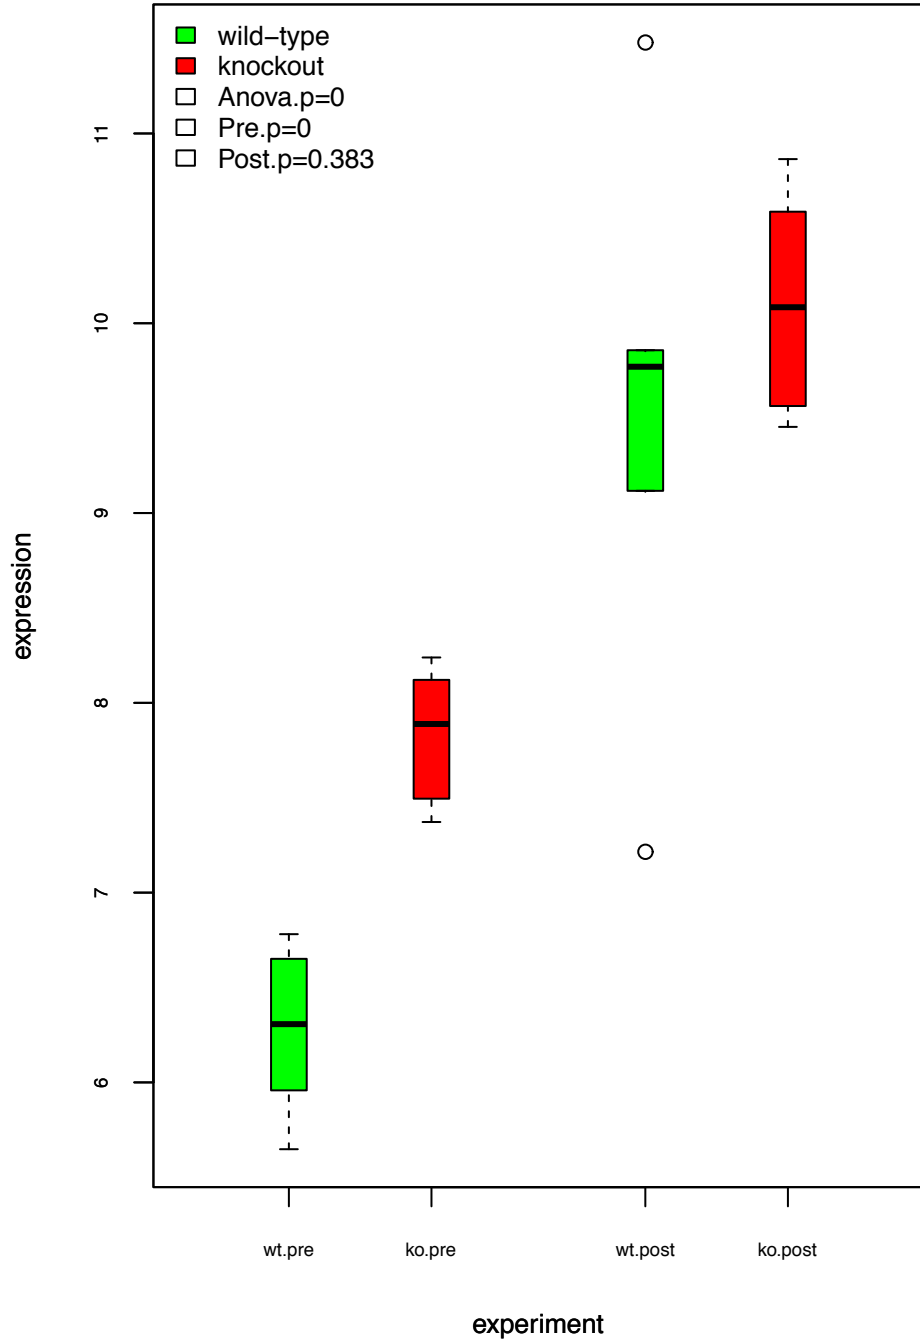

### Wnt5a

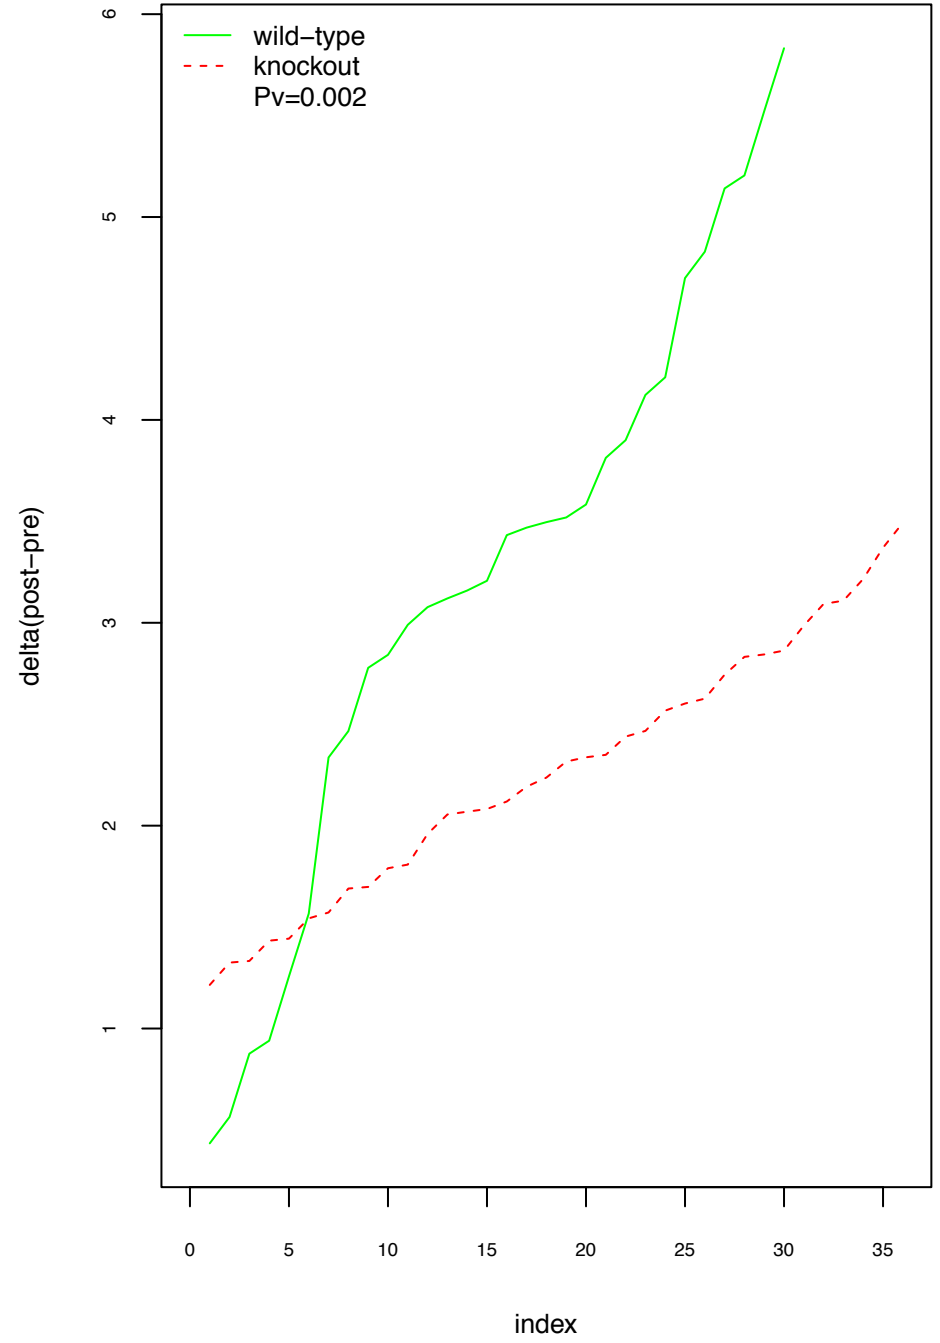

### Wnt4

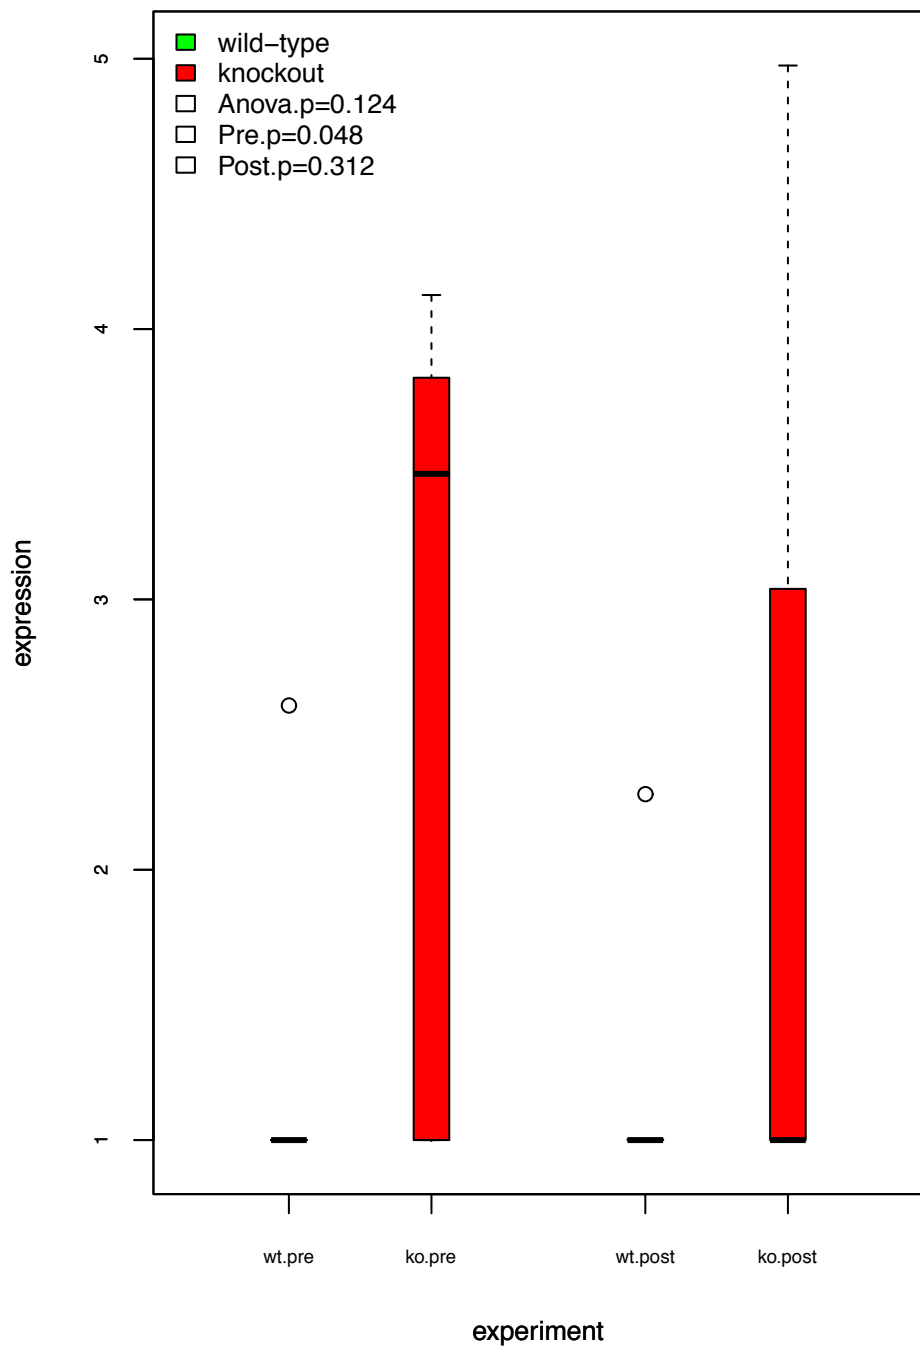

### Wnt4

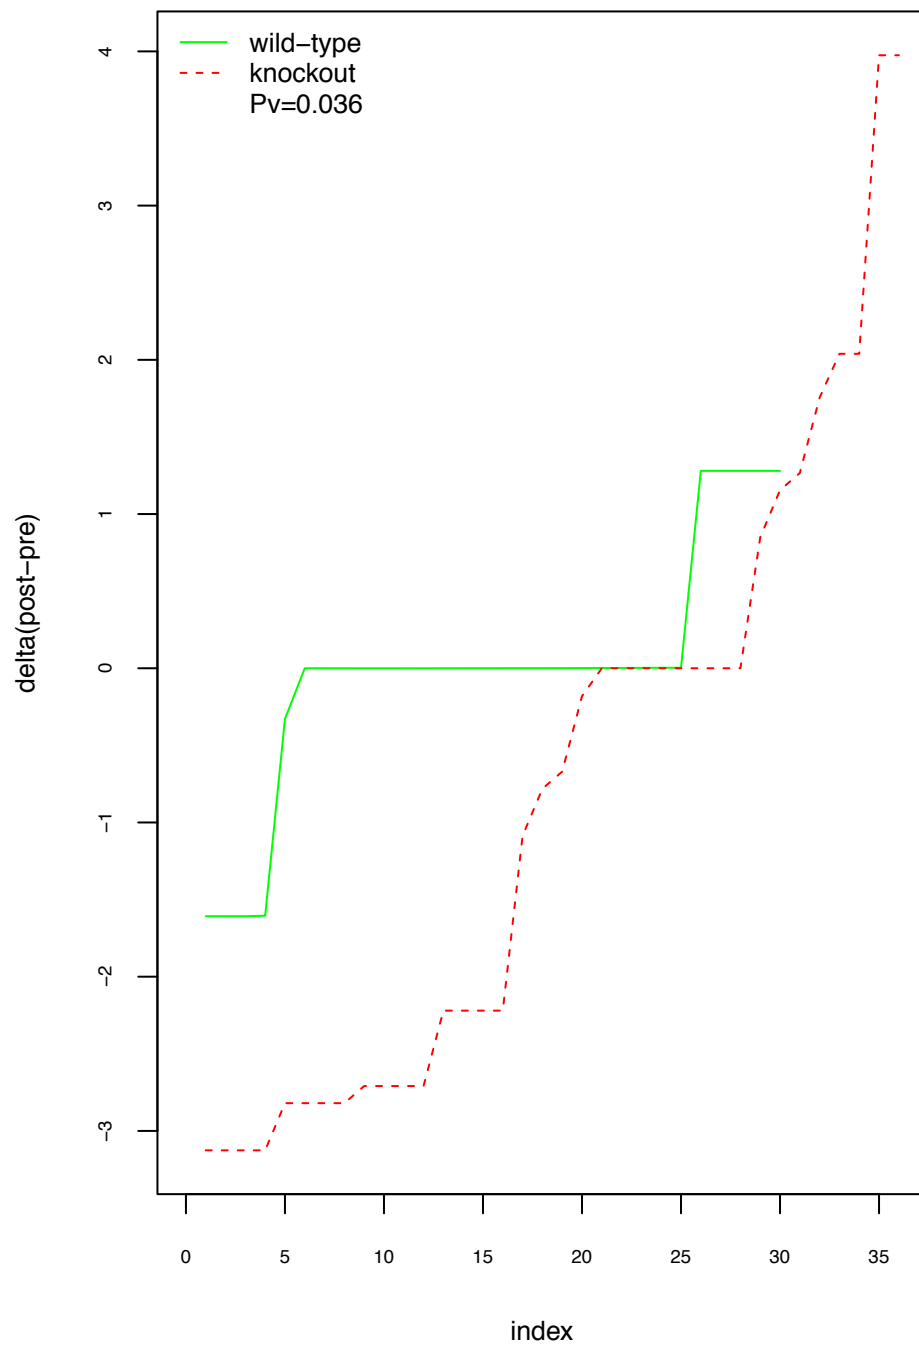

# Wnt3a

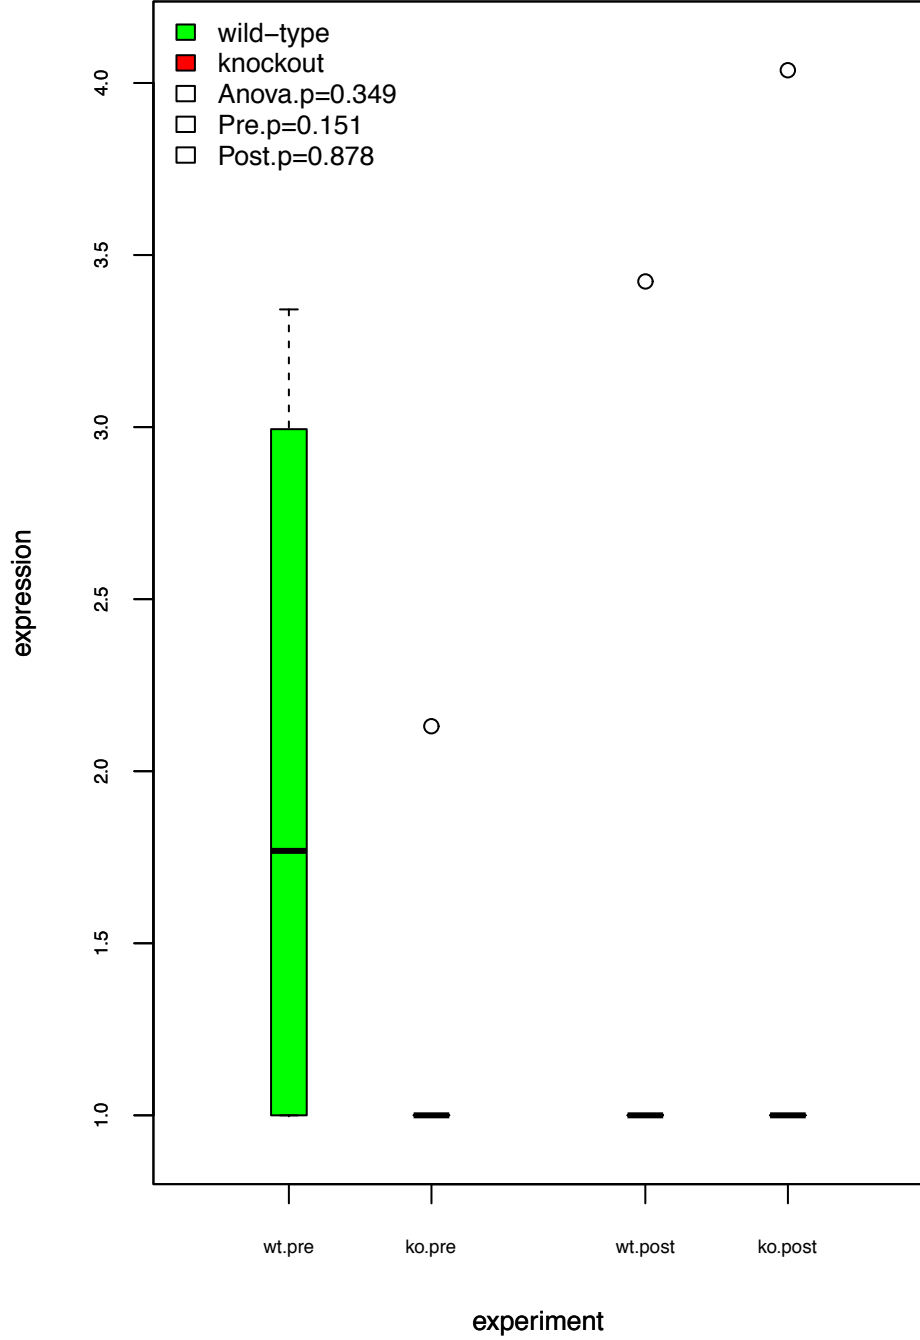

# Wnt3a

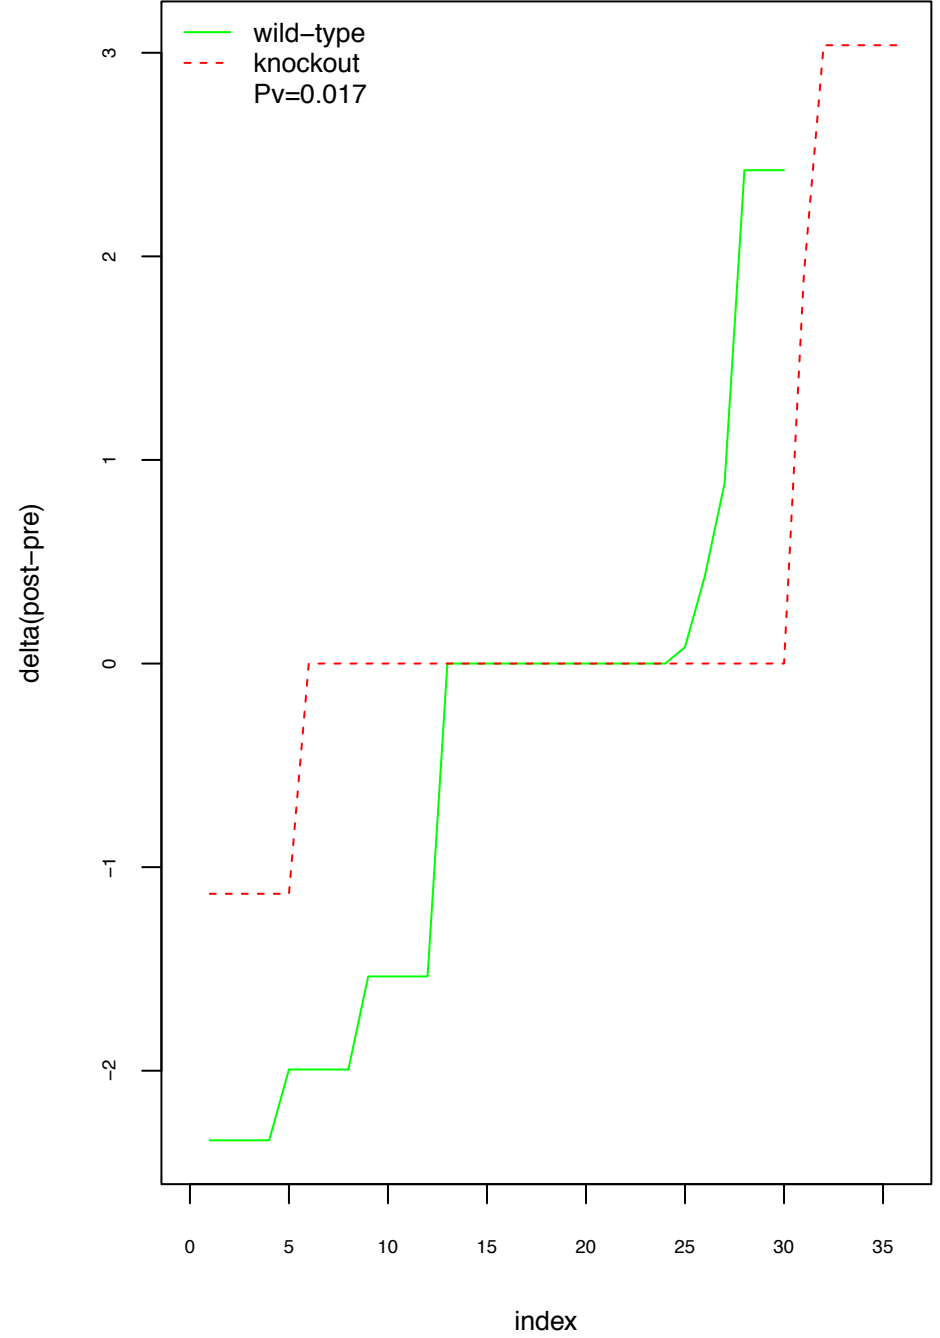

### Wnt3

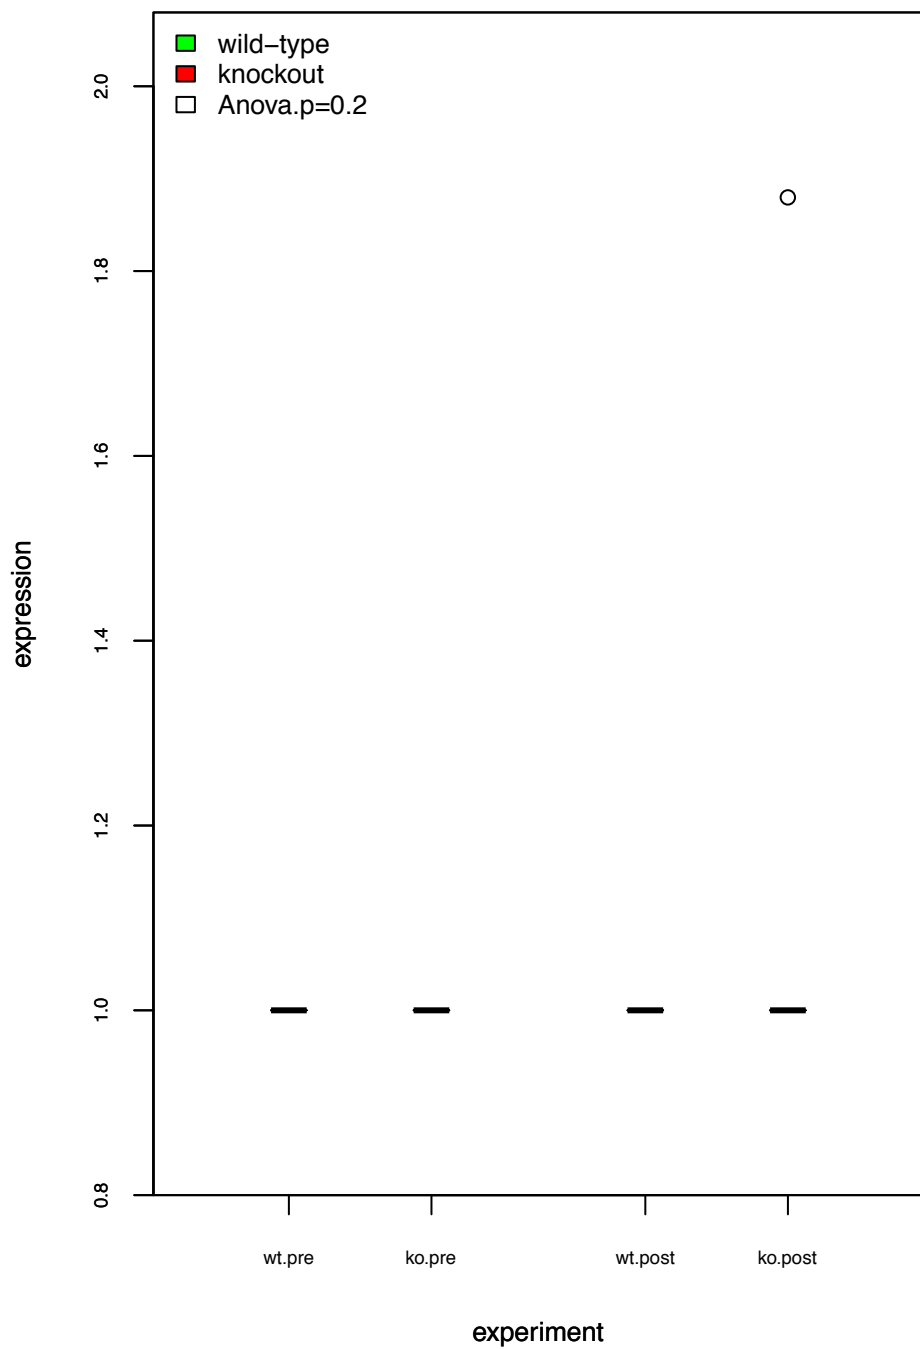

### Wnt3

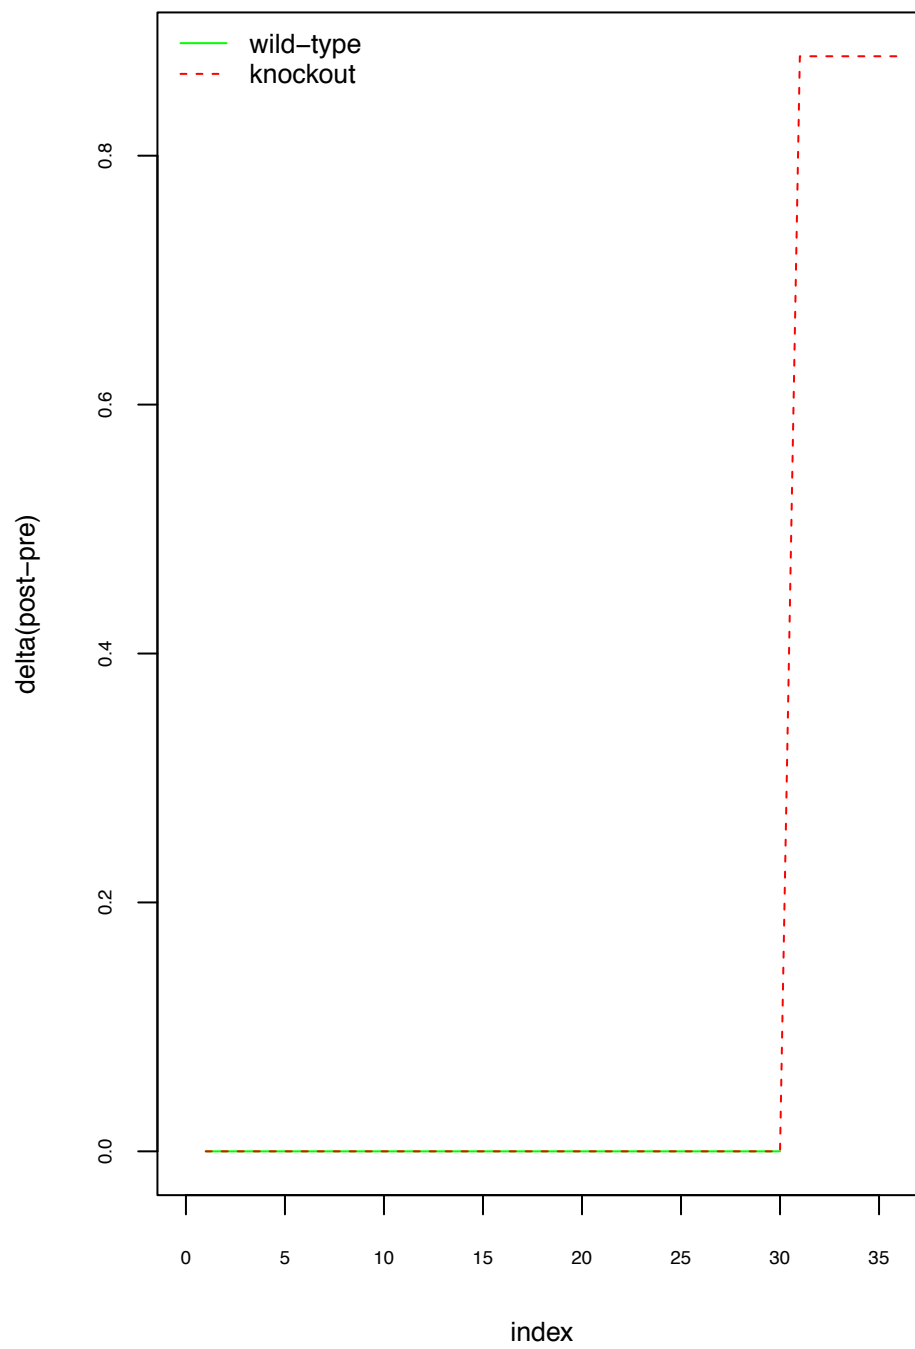

## Wnt2b

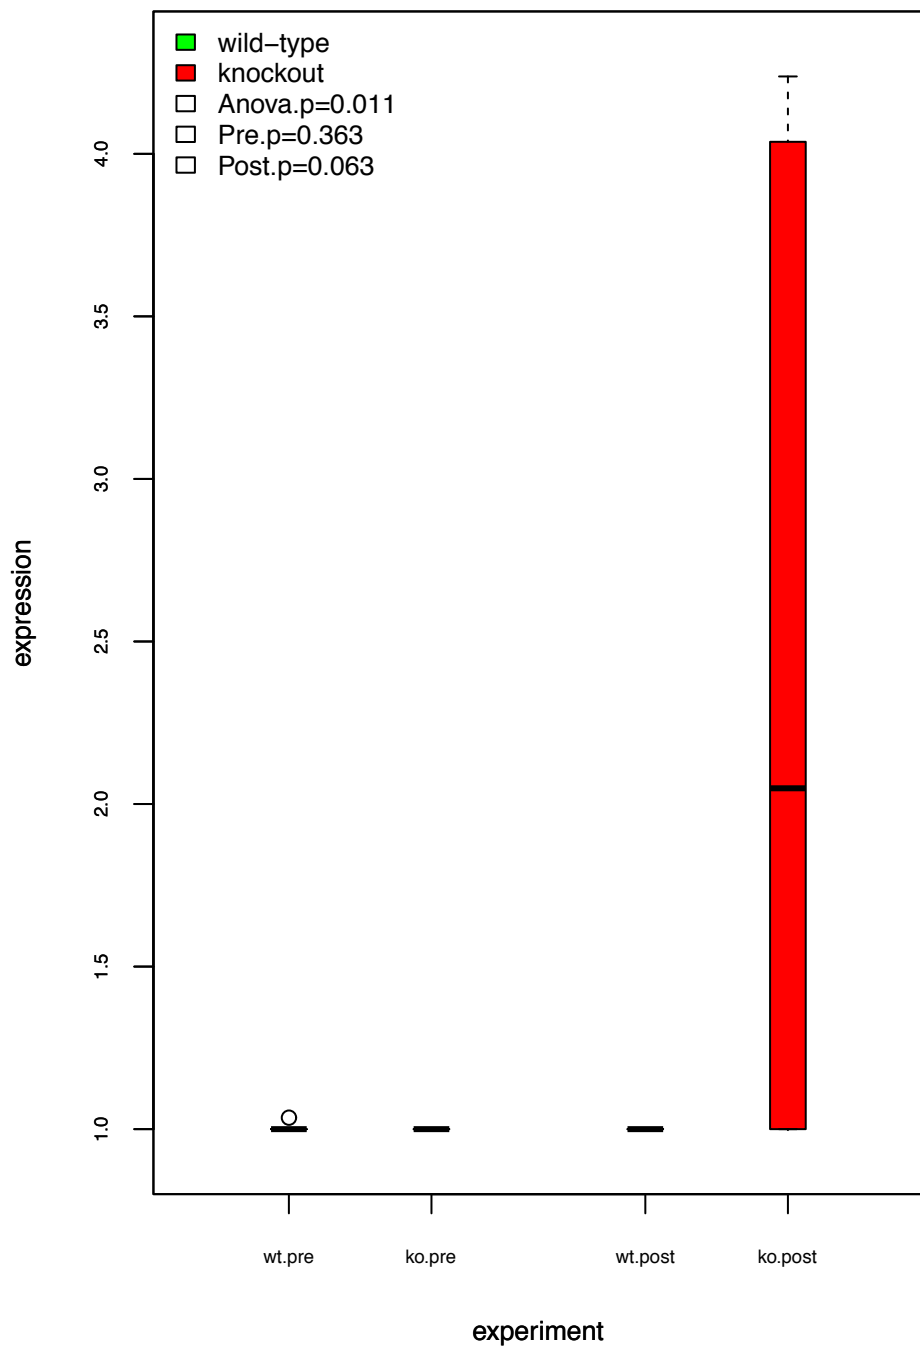

## Wnt2b

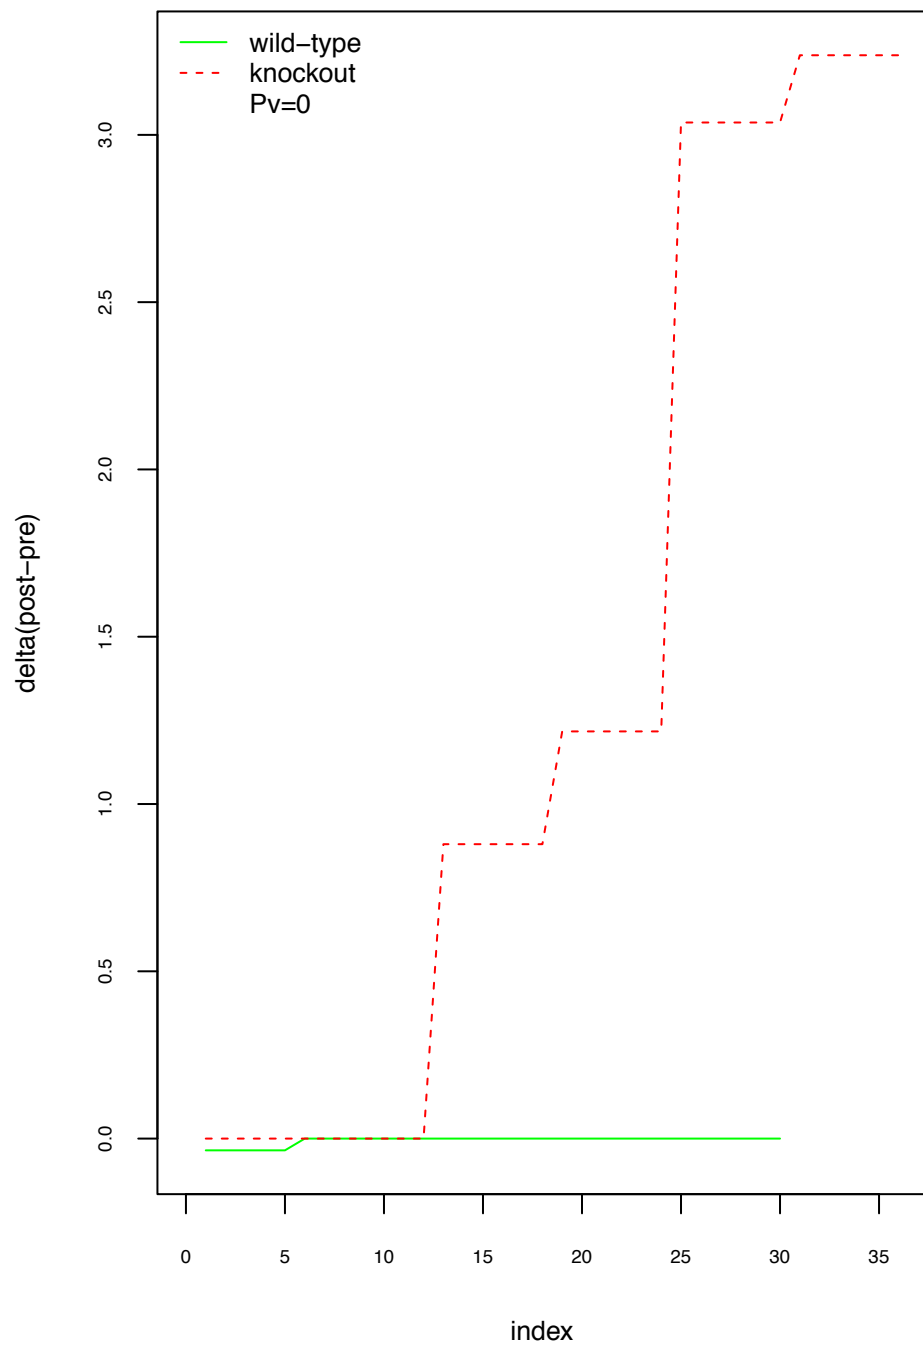

## Wnt1

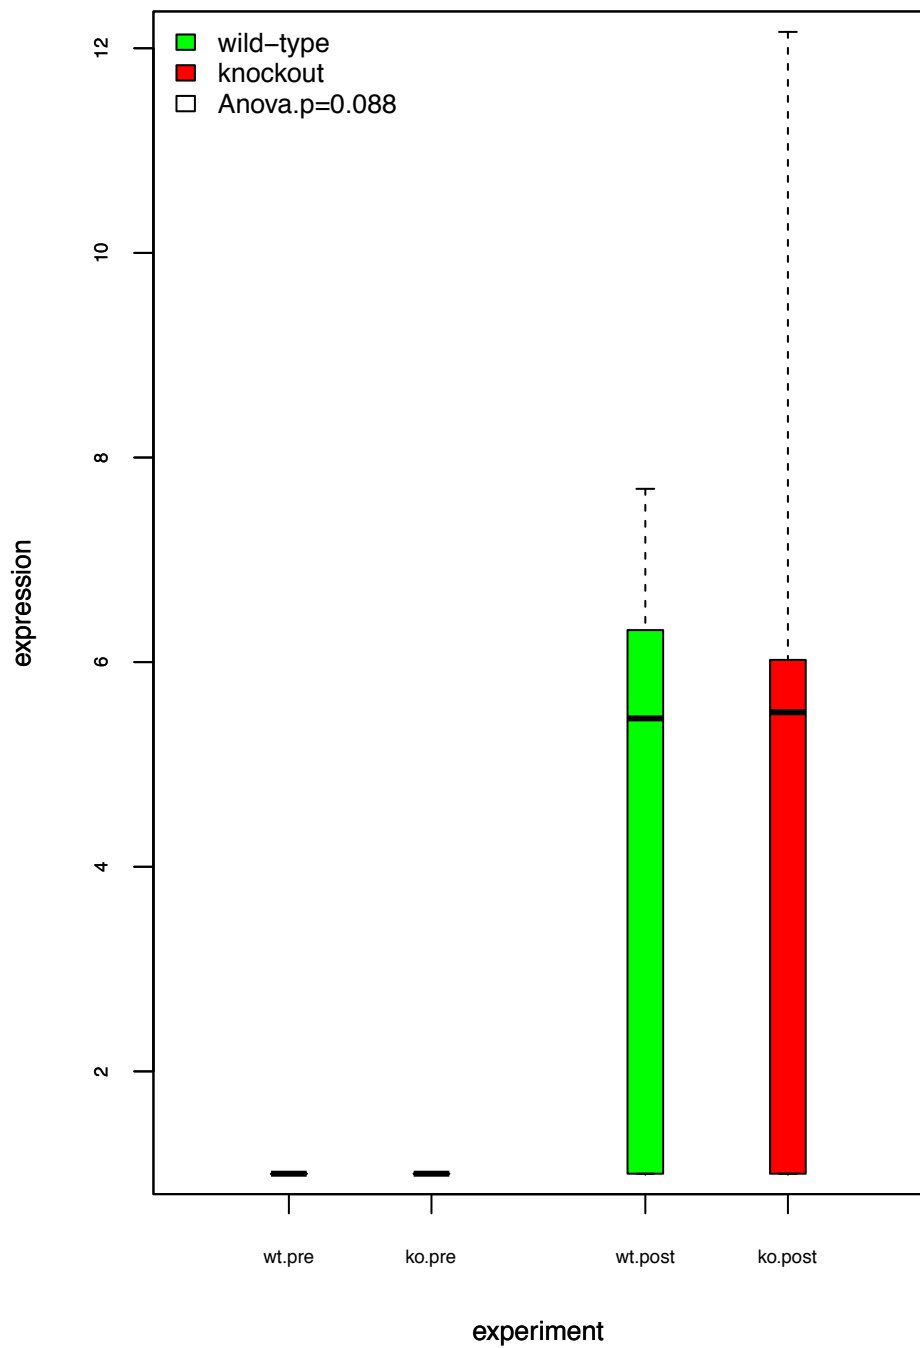

## Wnt1

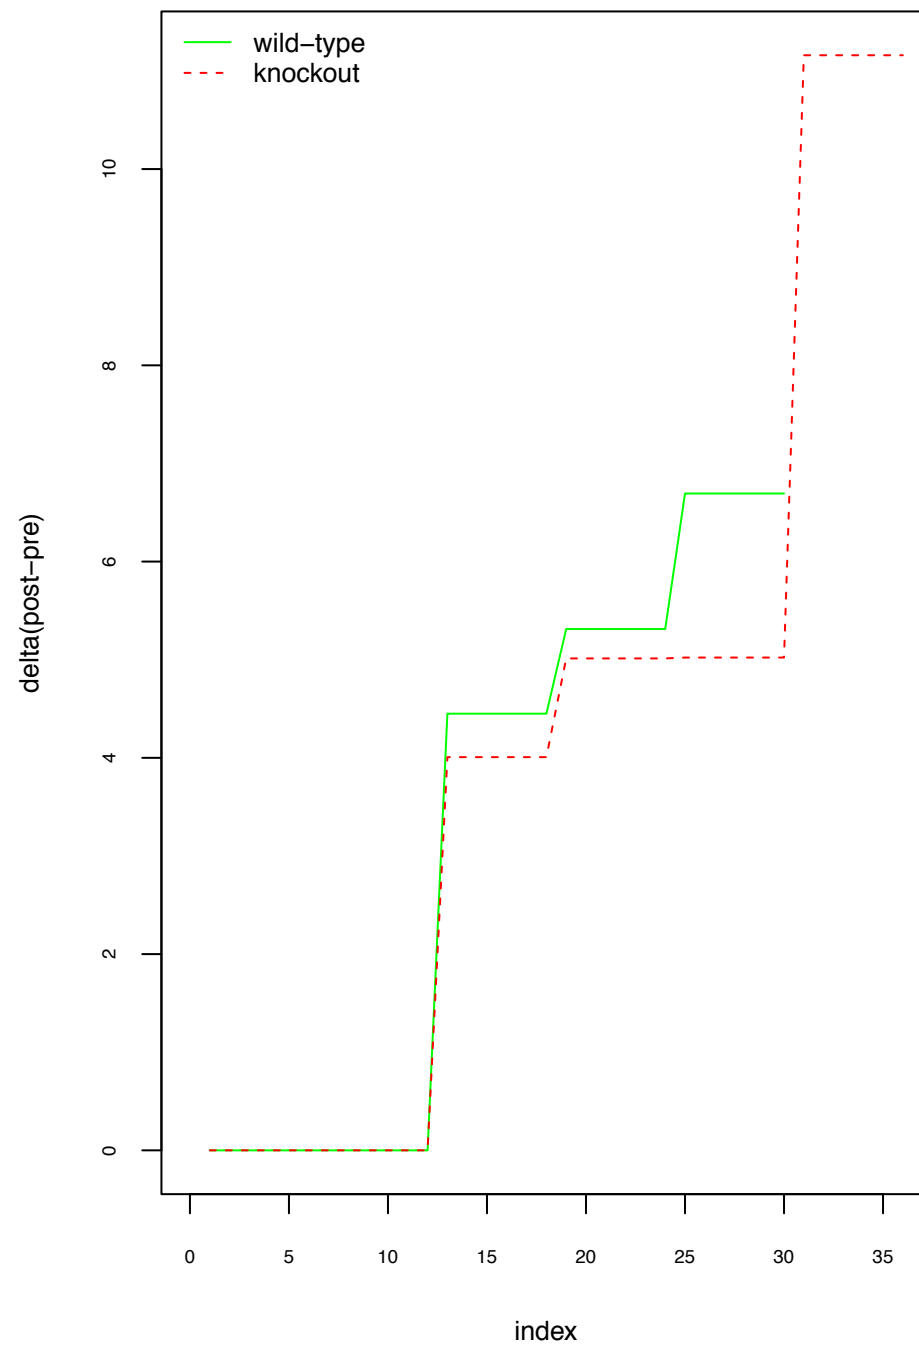

### Wif1

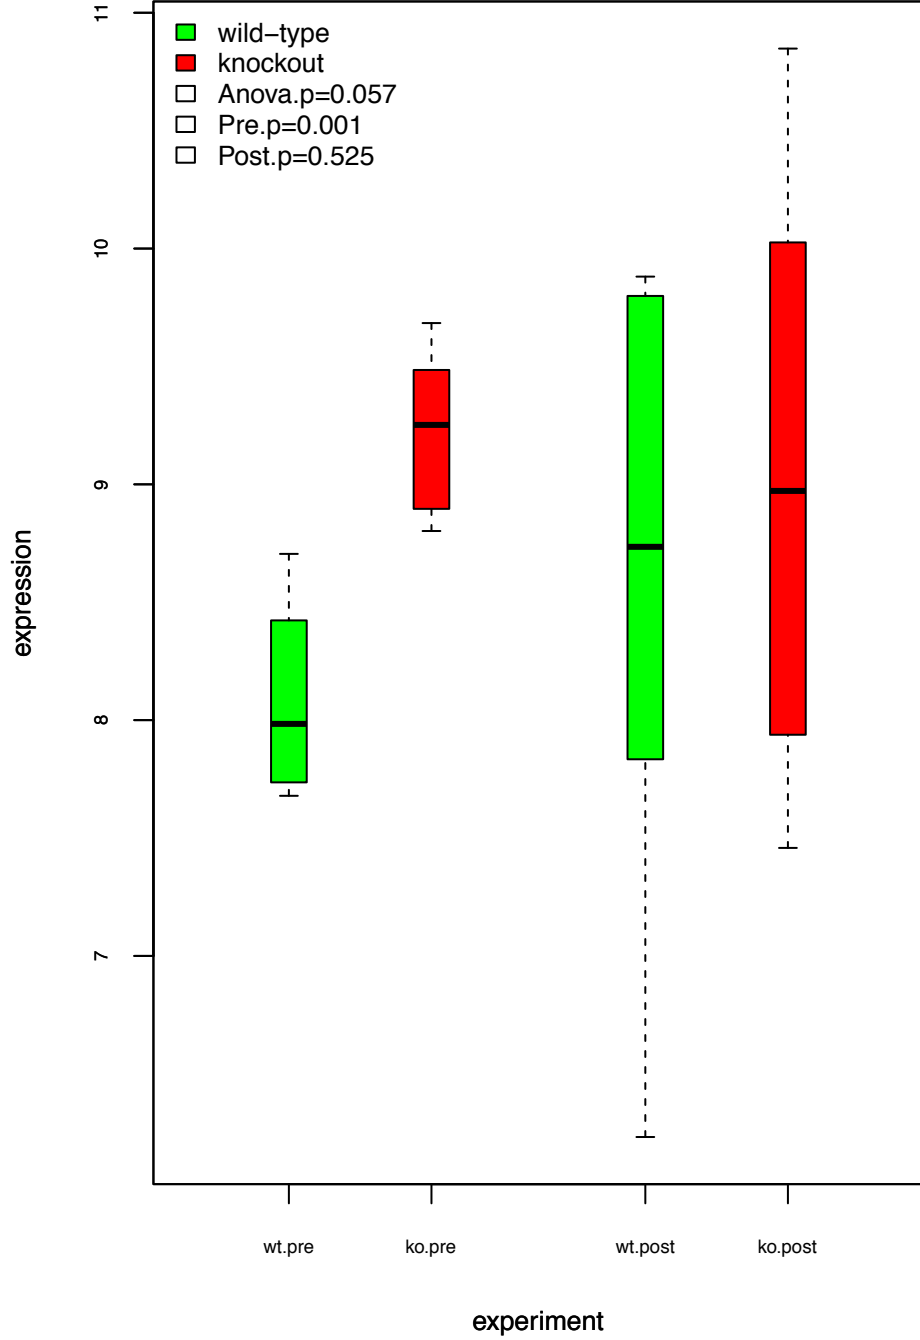

### Wif1

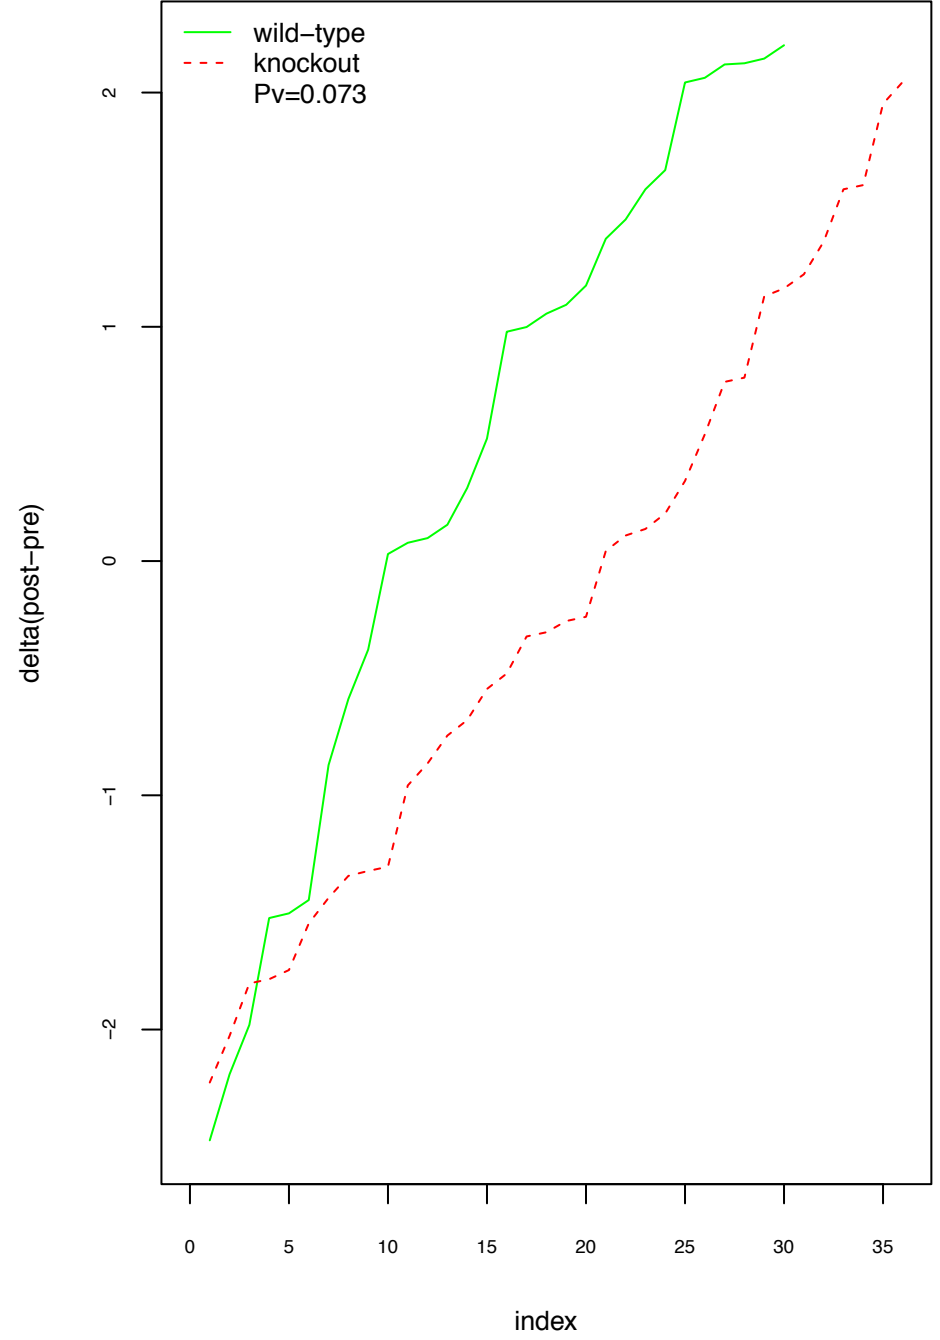

Supplement: NIHMS1036202-supplement-5.pdf [file NIHMS1036202-supplement-5.pdf]
